# Supplementary material for: Lipidomic profiles, lipid trajectories and clinical biomarkers in female elite endurance athletes
Source: PubMed Central journal article supplement (PMC7012926; doi:10.1038/s41598-020-59127-8), 2020-02-11

# SUPPLEMENTARY TEXT 2

Lipid trajectories of 201  
individual lipidomics features

| Feature                                  | Page |
|------------------------------------------|------|
| GLYCEROLIPIDS                            |      |
| TG(14:0/16:0/18:1)                       | 10   |
| TG(14:0/18:1/18:1)                       | 13   |
| TG(14:0/18:2/18:2)                       | 16   |
| TG(16:0/18:0/18:1)                       | 19   |
| TG(16:0/18:2/18:2)                       | 22   |
| TG(16:0/18:2/18:3)                       | 25   |
| TG(16:0/18:2/22:6)                       | 28   |
| TG(16:0/22:5/18:1) or TG(20:4/18:1/18:1) | 31   |
| TG(18:0/18:1/20:4)                       | 34   |
| TG(18:1/12:0/18:1) or TG(18:2/16:0/14:0) | 37   |
| TG(18:1/18:1/16:0)                       | 40   |
| TG(18:1/18:1/18:1)                       | 43   |
| TG(18:1/18:1/22:6)                       | 46   |
| TG(18:1/18:2/18:2)                       | 49   |
| TG(18:2/18:1/16:0)                       | 52   |
| TG(18:2/18:1/18:1)                       | 55   |
| TG(18:2/18:2/18:2) or TG(18:3/18:2/18:1) | 58   |
| TG(18:2/22:5/16:0)                       | 61   |
| TG(40:0)                                 | 64   |
| TG(40:1)                                 | 67   |
| TG(42:0)                                 | 70   |
| TG(42:1)                                 | 73   |
| TG(42:2)                                 | 76   |
| TG(44:1)                                 | 79   |
| TG(44:2)                                 | 82   |
| TG(45:0)                                 | 85   |
| TG(46:0)                                 | 88   |
| TG(46:1)                                 | 91   |
| TG(46:2)                                 | 94   |

|            |     |
|------------|-----|
| TG(47:1)   | 97  |
| TG(47:2)   | 100 |
| TG(48:1)   | 103 |
| TG(49:0)   | 106 |
| TG(49:1)   | 109 |
| TG(49:2)   | 112 |
| TG(49:3)   | 115 |
| TG(50:0)   | 118 |
| TG(50:0).1 | 121 |
| TG(50:1)   | 124 |
| TG(50:2)   | 127 |
| TG(50:3)   | 130 |
| TG(50:3).1 | 133 |
| TG(50:4)   | 136 |
| TG(50:5)   | 139 |
| TG(51:1)   | 142 |
| TG(51:2)   | 145 |
| TG(51:2).1 | 148 |
| TG(51:3)   | 151 |
| TG(51:4)   | 154 |
| TG(52:0)   | 157 |
| TG(52:1)   | 160 |
| TG(52:2)   | 163 |
| TG(52:3)   | 166 |
| TG(52:4)   | 169 |
| TG(52:5)   | 172 |
| TG(52:6)   | 175 |
| TG(52:7)   | 178 |
| TG(53:1)   | 181 |
| TG(53:2)   | 184 |
| TG(53:2).1 | 187 |

|           |     |
|-----------|-----|
| TG(53:3)  | 190 |
| TG(53:4)  | 193 |
| TG(53:5)  | 196 |
| TG(54:1)  | 199 |
| TG(54:2)  | 202 |
| TG(54:3)  | 205 |
| TG(54:4)  | 208 |
| TG(54:5)  | 211 |
| TG(54:6)  | 214 |
| TG(54:7)  | 217 |
| TG(54:8)  | 220 |
| TG(55:2)  | 223 |
| TG(55:3)  | 226 |
| TG(55:4)  | 229 |
| TG(55:5)  | 232 |
| TG(55:6)  | 235 |
| TG(55:7)  | 238 |
| TG(56:1)  | 241 |
| TG(56:2)  | 244 |
| TG(56:3)  | 247 |
| TG(56:4)  | 250 |
| TG(56:5)  | 253 |
| TG(56:6)  | 256 |
| TG(56:7)  | 259 |
| TG(56:8)  | 262 |
| TG(56:9)  | 265 |
| TG(58:10) | 268 |
| TG(58:11) | 271 |
| TG(58:3)  | 274 |
| TG(58:4)  | 277 |
| TG(58:5)  | 280 |

|                      |     |
|----------------------|-----|
| TG(58:6)             | 283 |
| TG(58:7)             | 286 |
| TG(58:8)             | 289 |
| TG(58:9)             | 292 |
| TG(60:10)            | 295 |
| TG(60:11)            | 298 |
| TG(60:12)            | 301 |
| TG(60:7)             | 304 |
| TG(60:9)             | 307 |
| TG(62:13)            | 310 |
| GLYCEROPHOSPHOLIPIDS |     |
| LPC(16:0e)           | 314 |
| LPC(16:0p)           | 317 |
| LPC(16:1)            | 320 |
| LPC(18:1)            | 323 |
| LPC(18:2)            | 326 |
| LPC(20:3)            | 329 |
| LPC(20:4)            | 332 |
| LPC(22:5)            | 335 |
| LPC(22:6)            | 338 |
| PC(30:0)             | 341 |
| PC(31:1)             | 344 |
| PC(32:0)             | 347 |
| PC(32:1)             | 350 |
| PC(32:2)             | 353 |
| PC(33:1)             | 356 |
| PC(34:1)             | 359 |
| PC(34:2)             | 362 |
| PC(34:3)             | 365 |
| PC(35:1)             | 368 |
| PC(35:2)             | 371 |

|                 |     |
|-----------------|-----|
| PC(35:3)        | 374 |
| PC(35:4)        | 377 |
| PC(36:1)        | 380 |
| PC(36:2)        | 383 |
| PC(36:3)        | 386 |
| PC(36:4)        | 389 |
| PC(36:5)        | 392 |
| PC(36:6)        | 395 |
| PC(37:1)        | 398 |
| PC(37:2)        | 401 |
| PC(37:3)        | 404 |
| PC(37:4)        | 407 |
| PC(37:6)        | 410 |
| PC(38:1)        | 413 |
| PC(38:2)        | 416 |
| PC(38:3)        | 419 |
| PC(38:4)        | 422 |
| PC(38:5)        | 425 |
| PC(38:6)        | 428 |
| PC(38:7)        | 431 |
| PC(40:3)        | 434 |
| PC(40:4)        | 437 |
| PC(40:5)        | 440 |
| PC(40:6)        | 443 |
| PC(40:7)        | 446 |
| PC(40:8)        | 449 |
| PC(42:5)        | 452 |
| PC(42:6)        | 455 |
| PC(O-20:0/22:4) | 458 |
| PC(O-20:0/22:6) | 461 |
| PC(O-22:2/22:3) | 464 |

|                                    |     |
|------------------------------------|-----|
| PC(O-32:0)                         | 467 |
| PC(O-32:1)                         | 470 |
| PC(O-34:2)                         | 473 |
| PC(O-34:3)                         | 476 |
| PC(O-36:2)                         | 479 |
| PC(O-36:3)                         | 482 |
| PC(O-36:4)                         | 485 |
| PC(O-36:5)                         | 488 |
| PC(O-38:3) or PC(P-38:2)           | 491 |
| PC(O-38:4)                         | 494 |
| PC(O-38:5)                         | 497 |
| PC(O-38:6)                         | 500 |
| PC(O-40:4)                         | 503 |
| PC(O-40:6)                         | 506 |
| PC(O-42:3)                         | 509 |
| PC(P-18:0/22:6)                    | 512 |
| PC(P-20:0/22:4)                    | 515 |
| PE(34:2)                           | 518 |
| PE(36:4)                           | 521 |
| PE(38:4)                           | 524 |
| PE(38:6)                           | 527 |
| PE(O-16:0/22:6) or PE(P-18:0/20:5) | 530 |
| PE(O-38:5) or PE(P-38:4)           | 533 |
| PE(P-18:0/22:6)                    | 536 |
| SPHINGOLIPIDS                      |     |
| SM(42:2)                           | 540 |
| SM(d16:1/18:1) or SM(d18:2/16:0)   | 543 |
| SM(d18:0/14:0)                     | 546 |
| SM(d18:1/12:0)                     | 549 |
| SM(d18:1/24:0) or SM(d18:0/24:1)   | 552 |
| SM(d18:1/24:0)                     | 555 |

|                                 |     |
|---------------------------------|-----|
| SM(d18:1/26:1)                  | 558 |
| SM(d18:2/14:0)                  | 561 |
| SM(d18:2/18:1)                  | 564 |
| SM(d18:2/24:1)                  | 567 |
| SM(d32:1)                       | 570 |
| SM(d33:1)                       | 573 |
| SM(d34:1)                       | 576 |
| SM(d36:1)                       | 579 |
| SM(d36:2)                       | 582 |
| SM(d38:0)                       | 585 |
| SM(d38:1)                       | 588 |
| SM(d38:2)                       | 591 |
| SM(d39:1)                       | 594 |
| SM(d40:1)                       | 597 |
| SM(d40:2)                       | 600 |
| SM(d41:1)                       | 603 |
| SM(d41:2)                       | 606 |
| MISCELLANEOUS                   |     |
| CE(18:2) + Unknown CE(667.6219) | 610 |
| Fragment: CE signature ion      | 613 |



# GLYCEROLIPIDS

Line plot of TG(14:0/16:0/18:1)

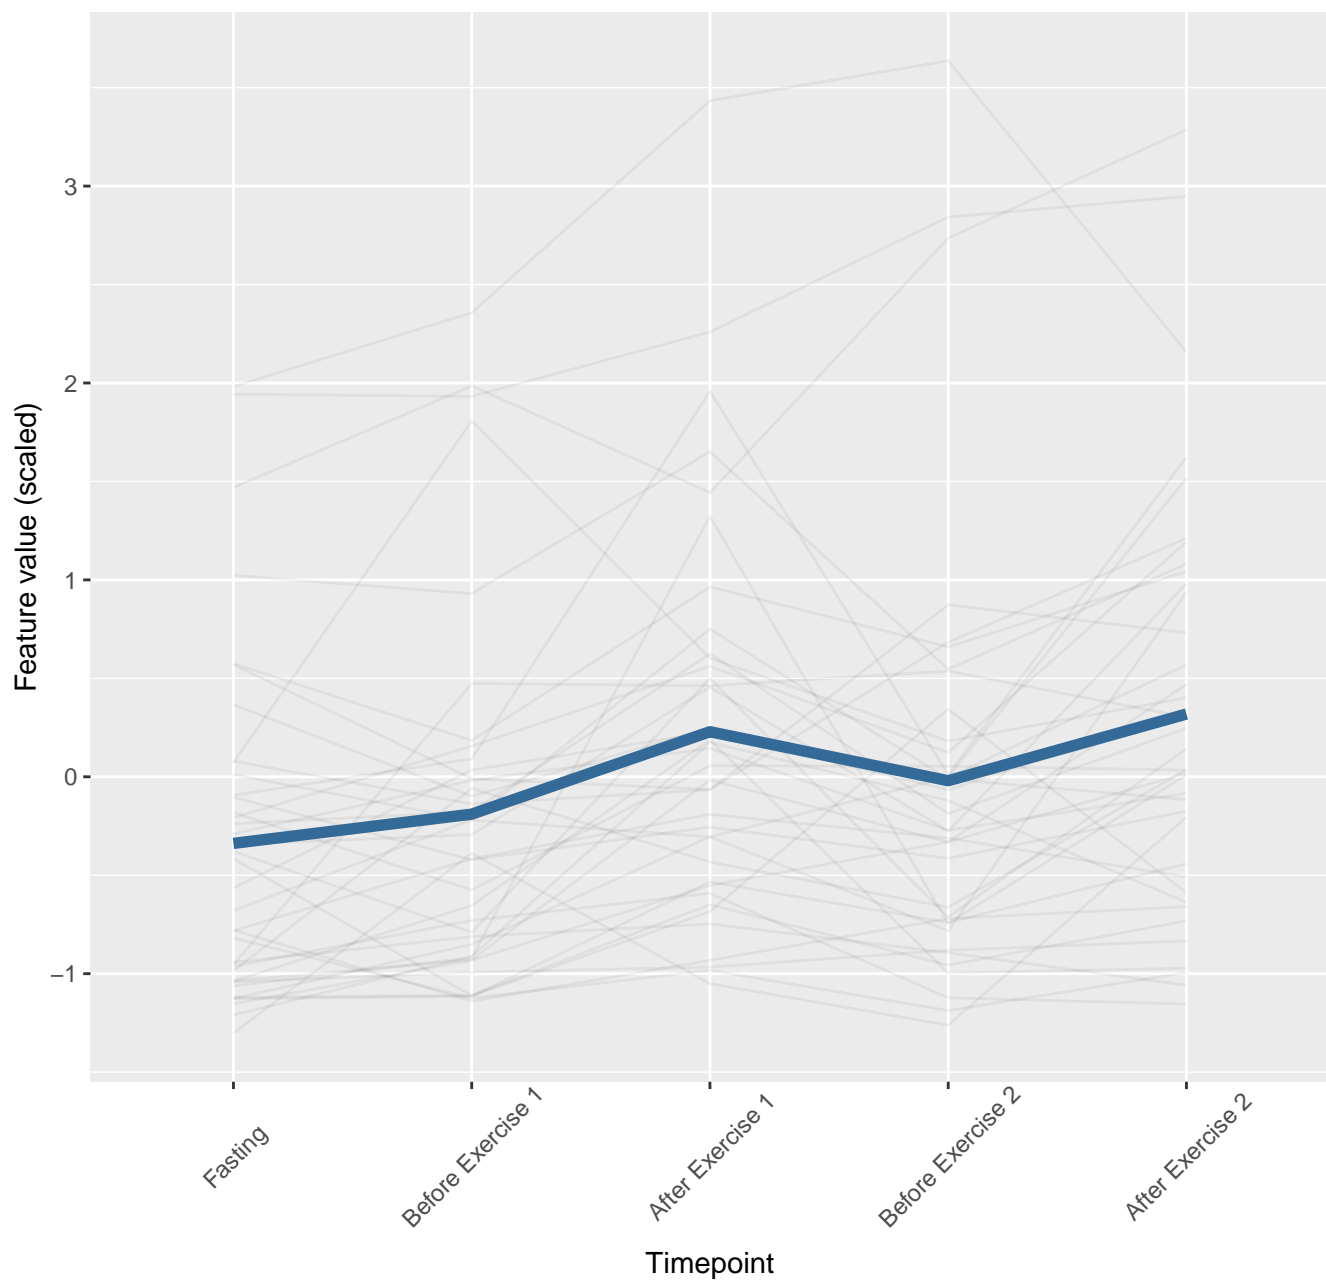

Line plot of TG(14:0/16:0/18:1)

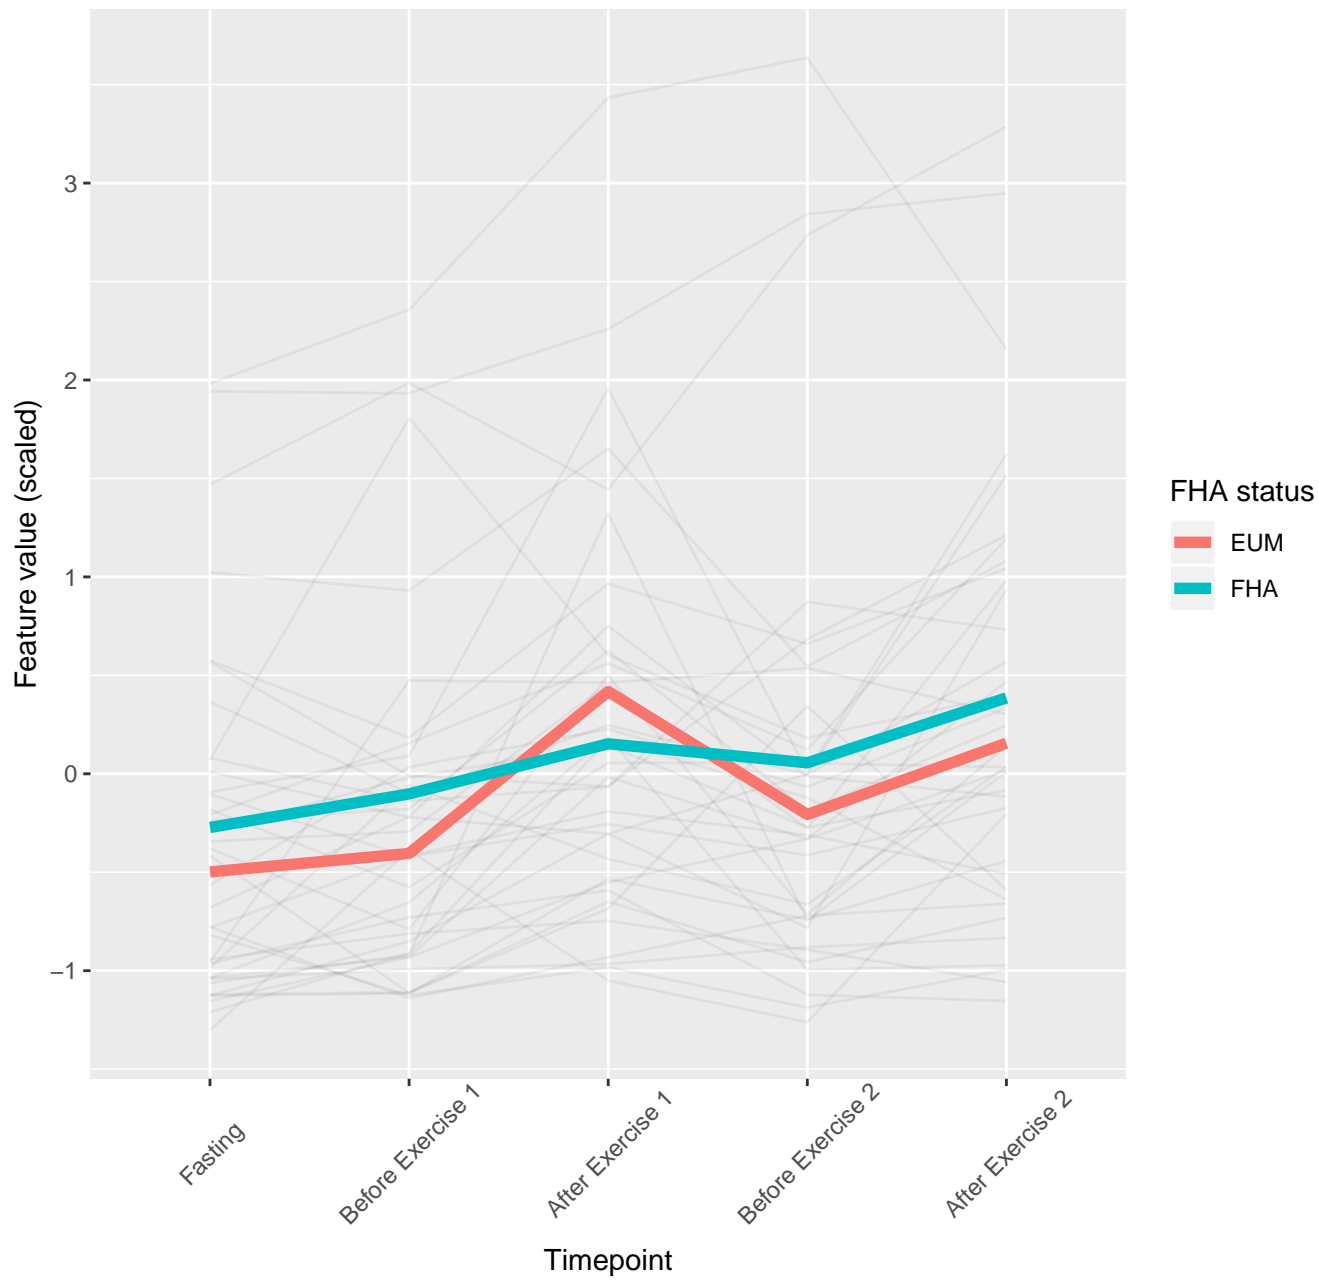

Line plot of TG(14:0/16:0/18:1)

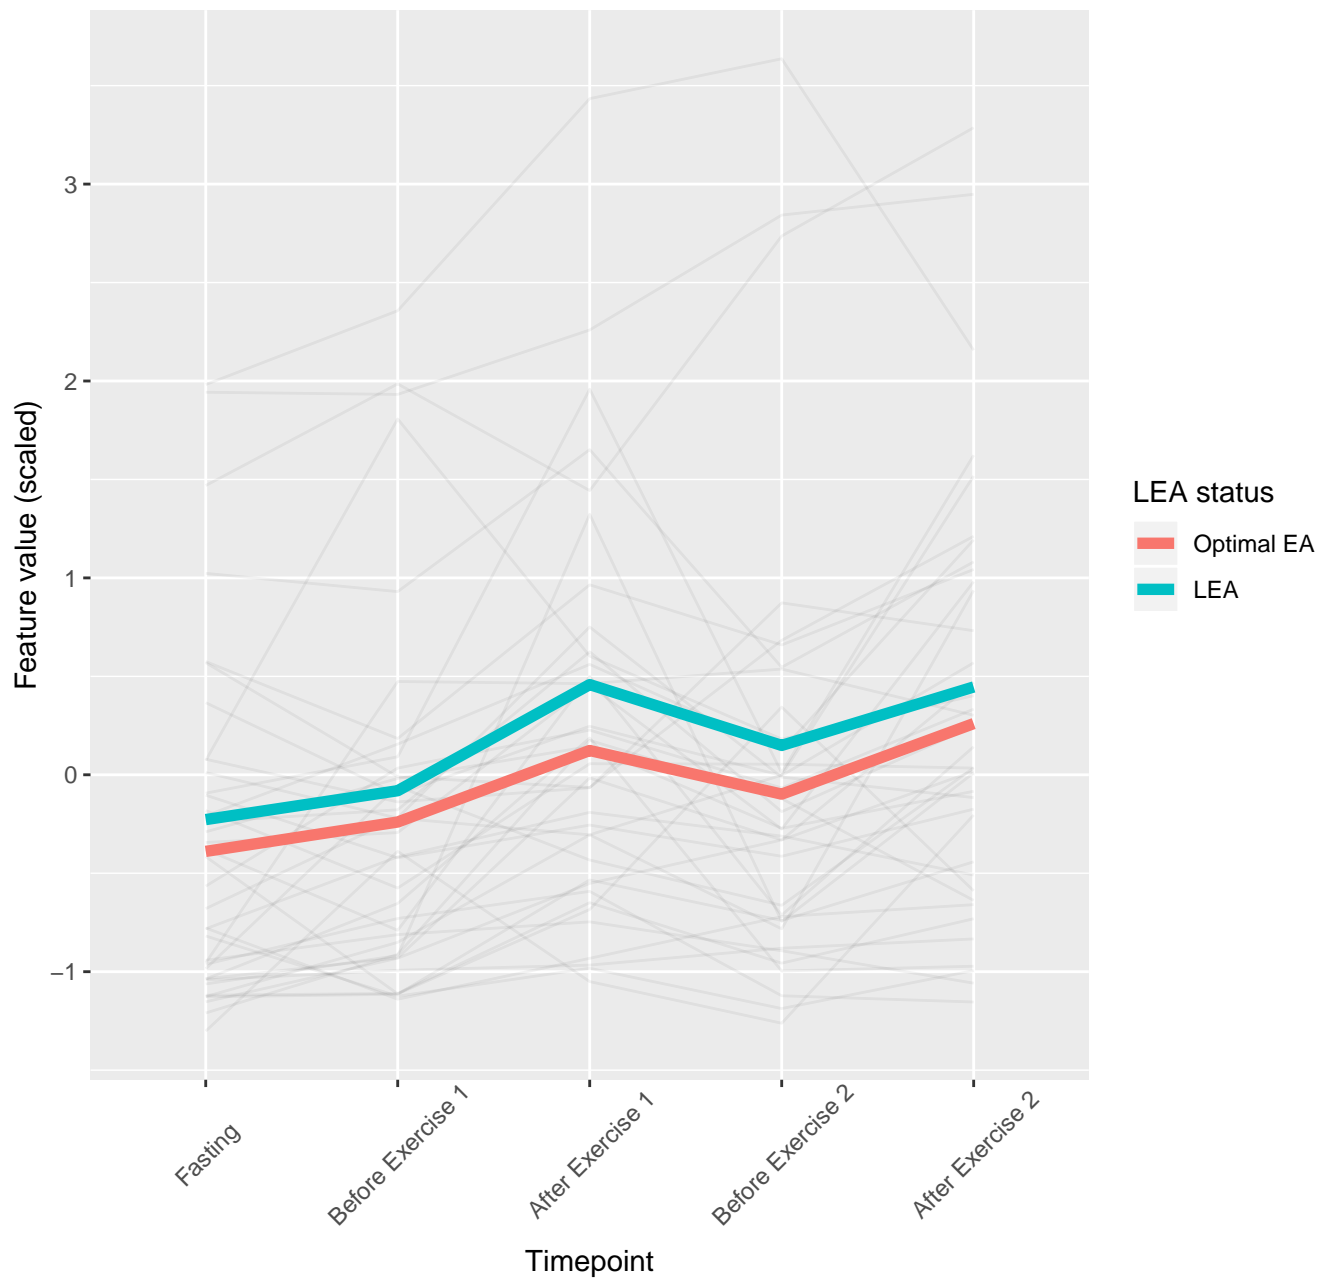

Line plot of TG(14:0/18:1/18:1)

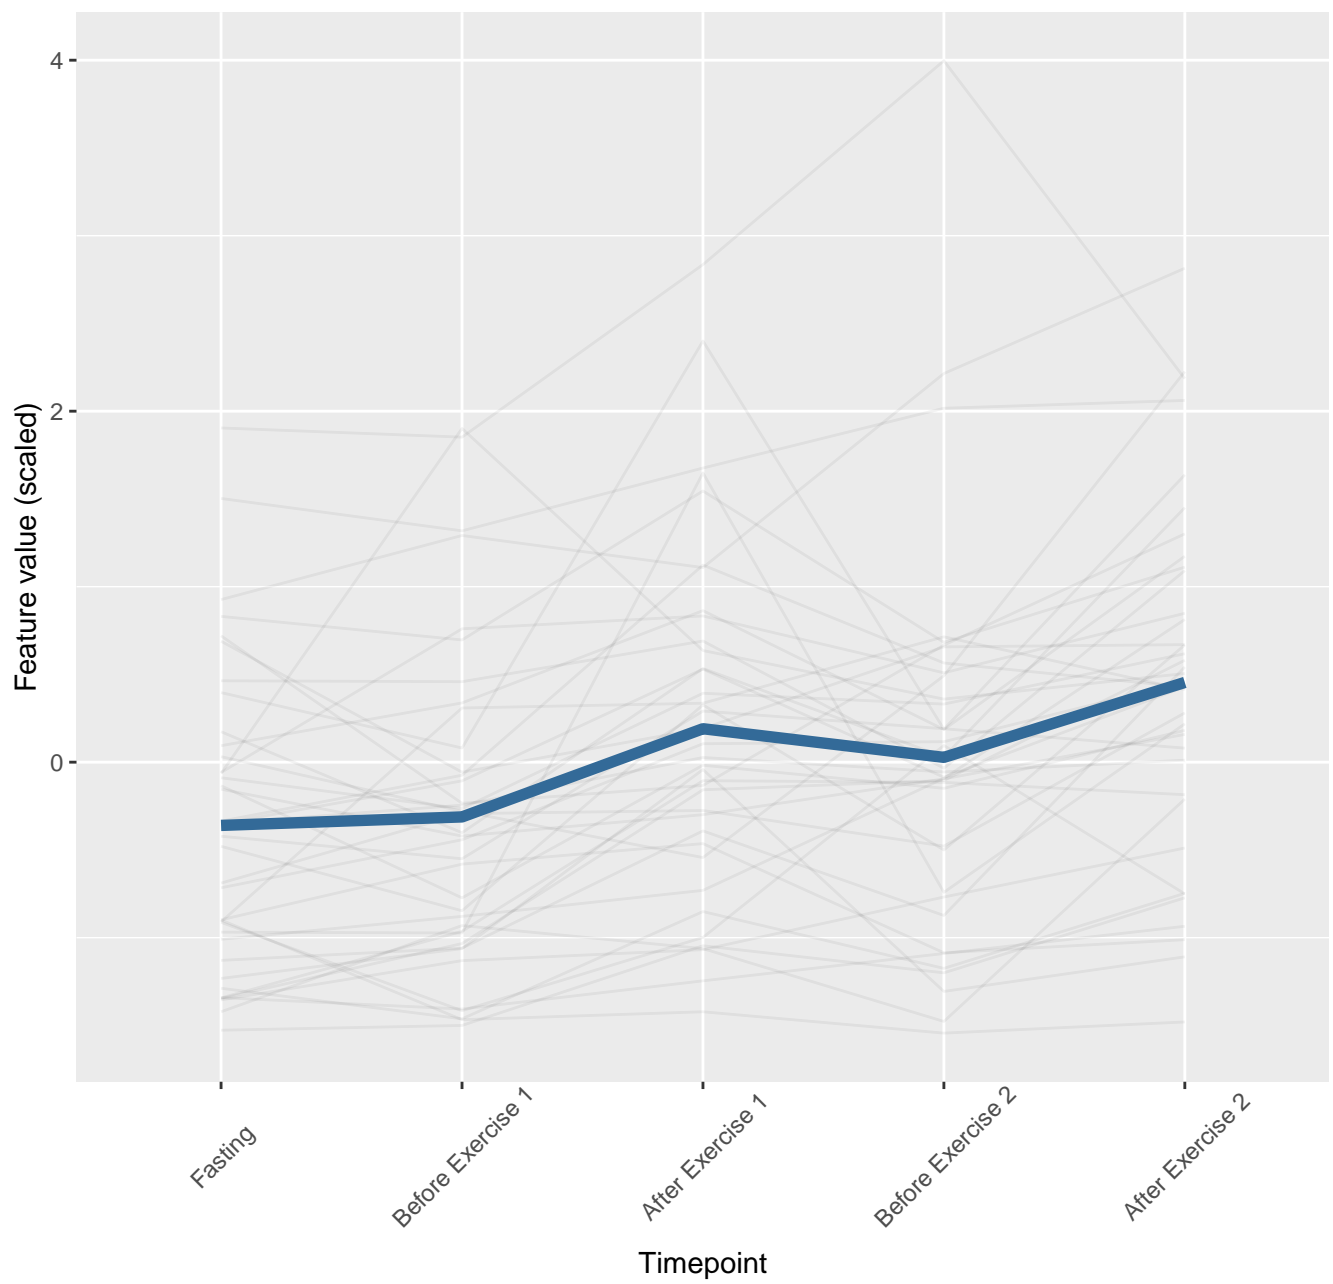

Line plot of TG(14:0/18:1/18:1)

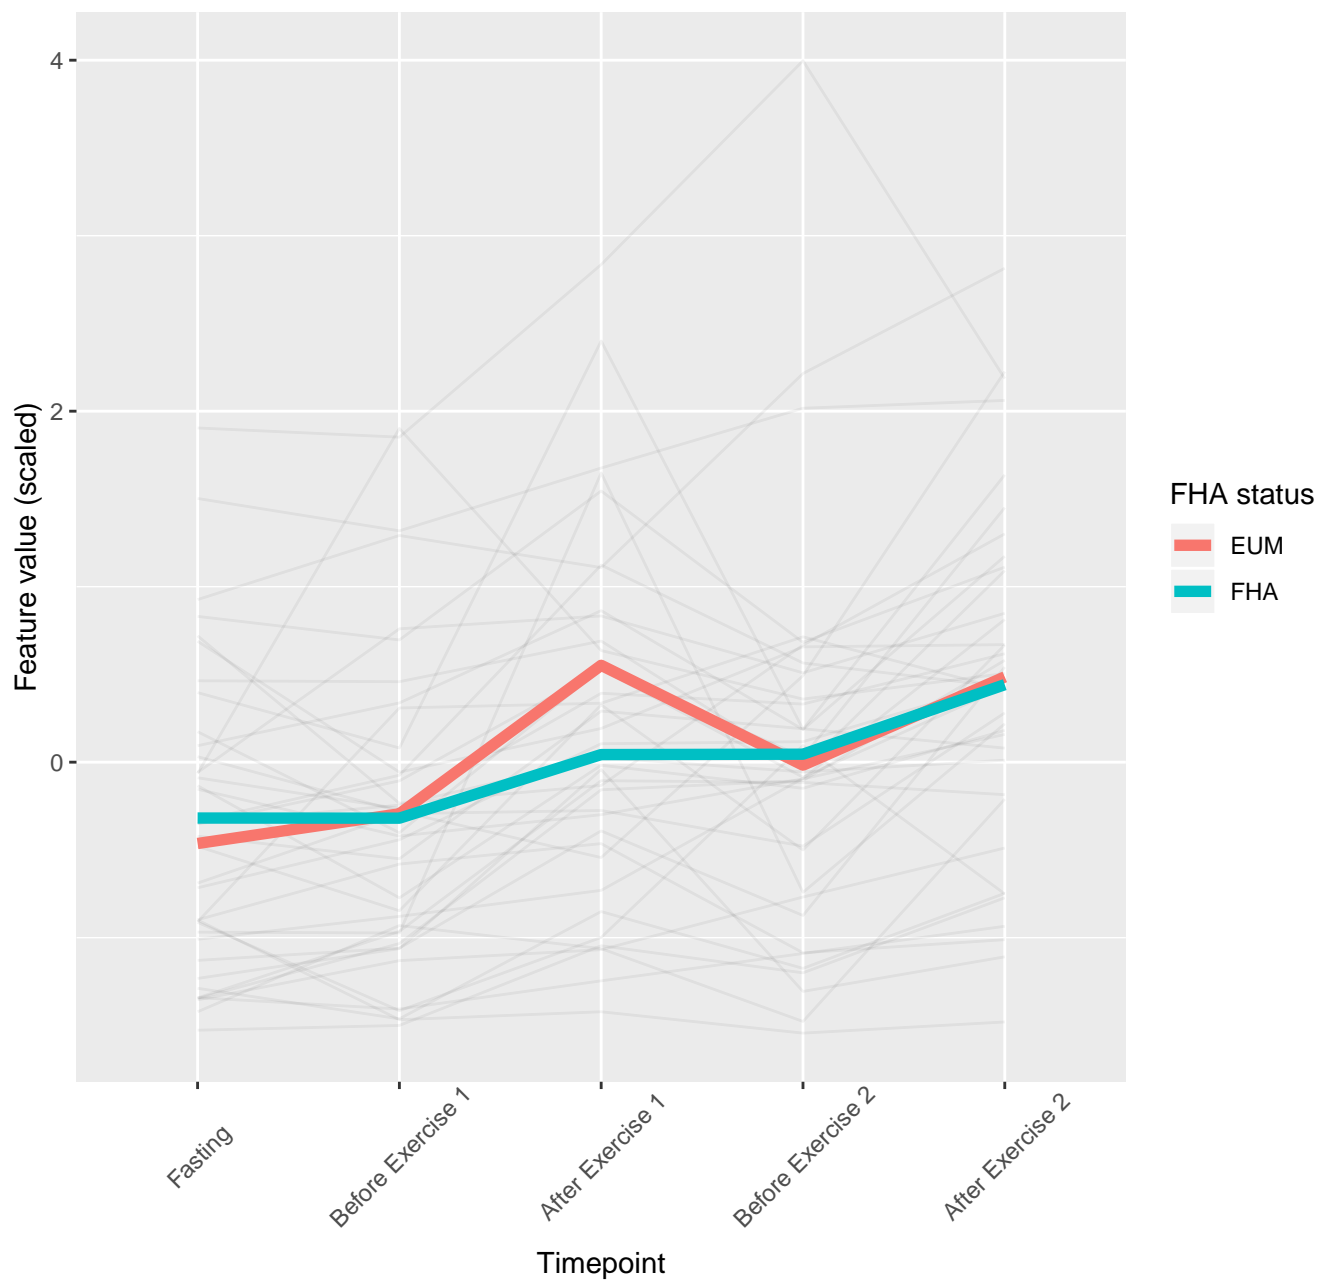

Line plot of TG(14:0/18:1/18:1)

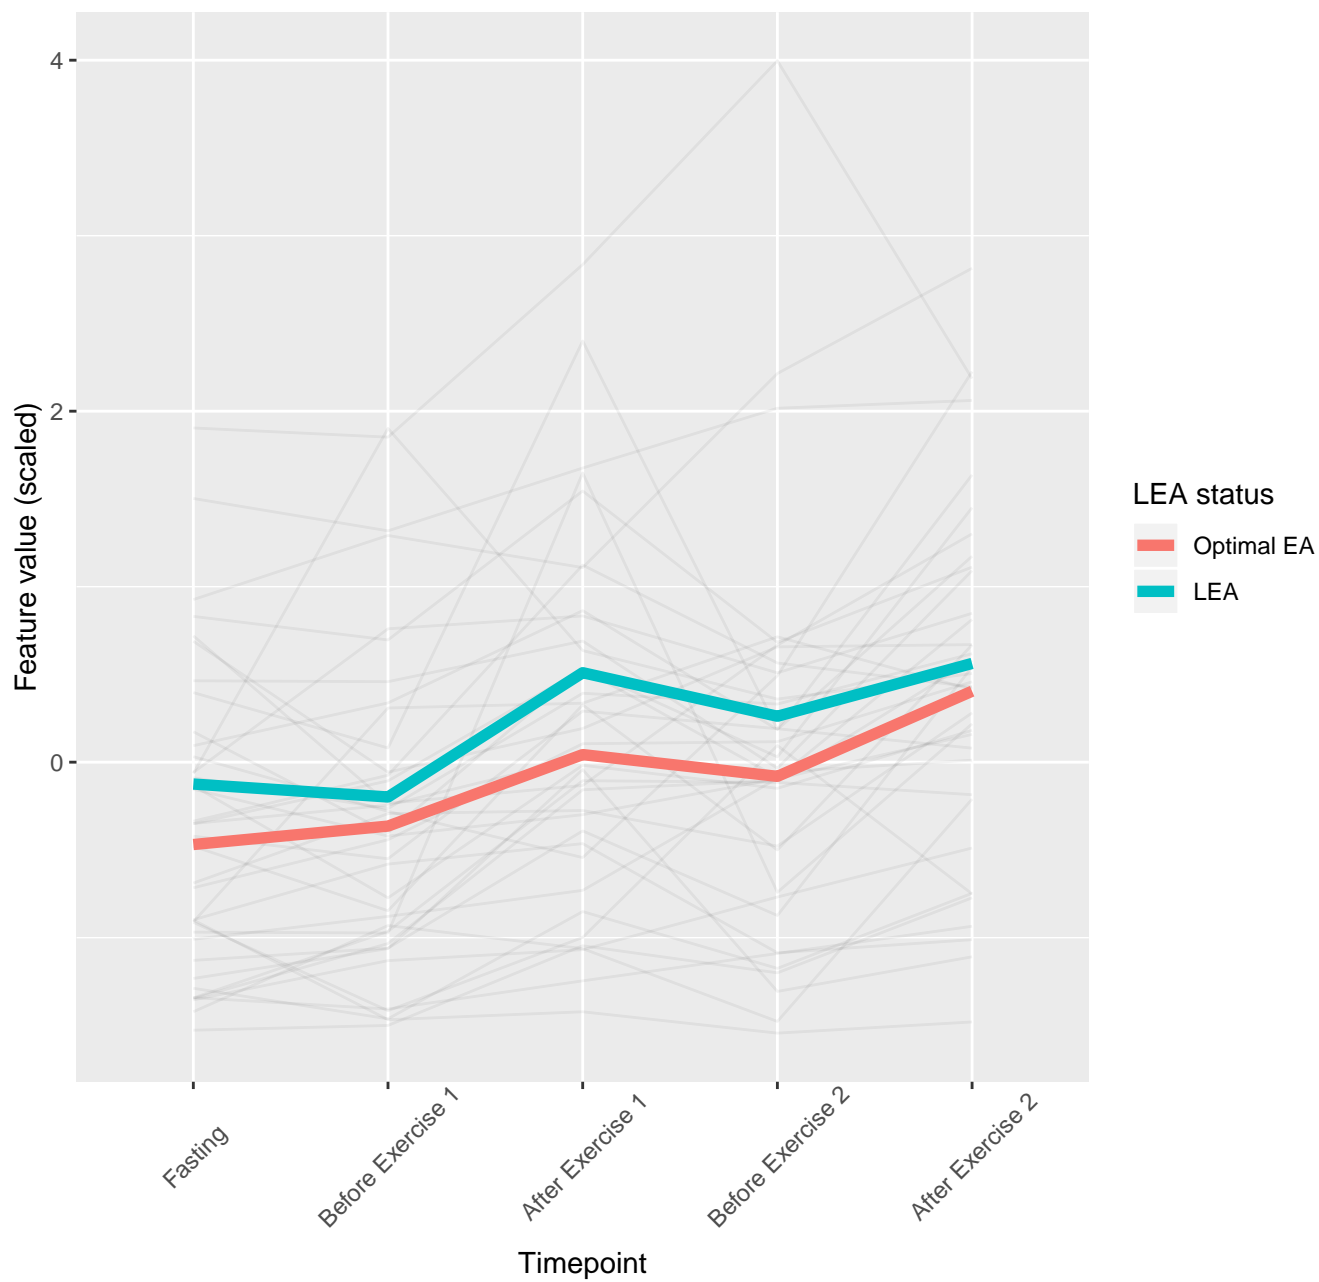

Line plot of TG(14:0/18:2/18:2)

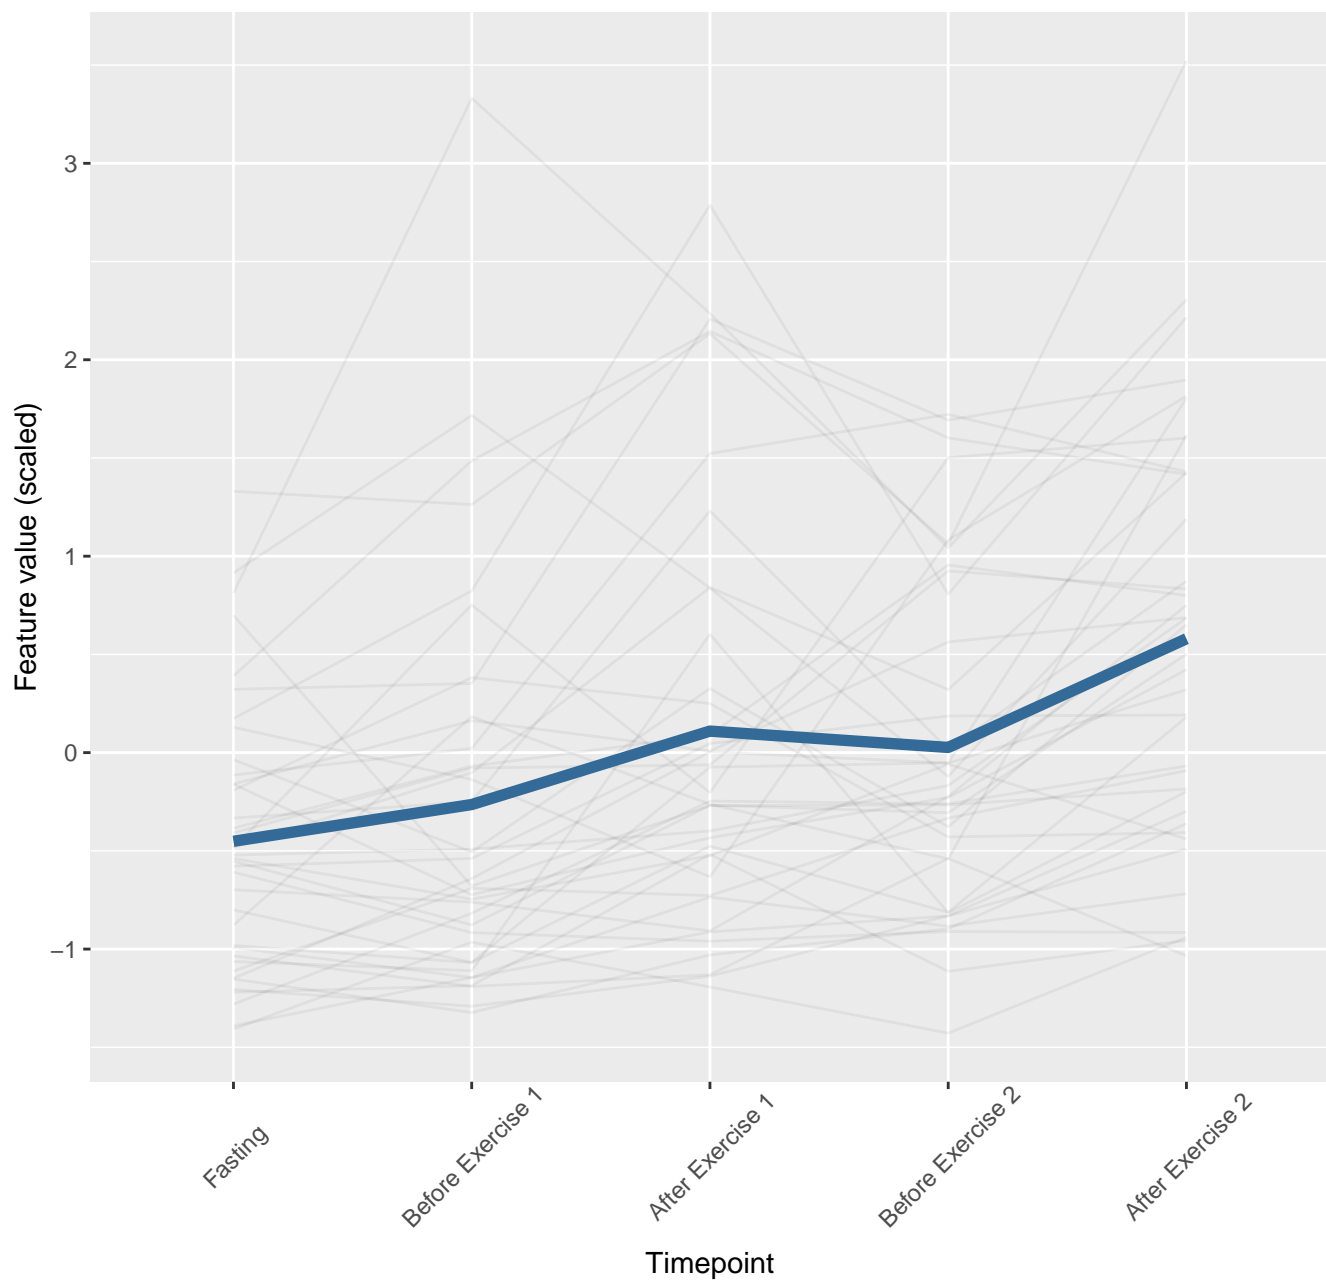



Line plot of TG(14:0/18:2/18:2)

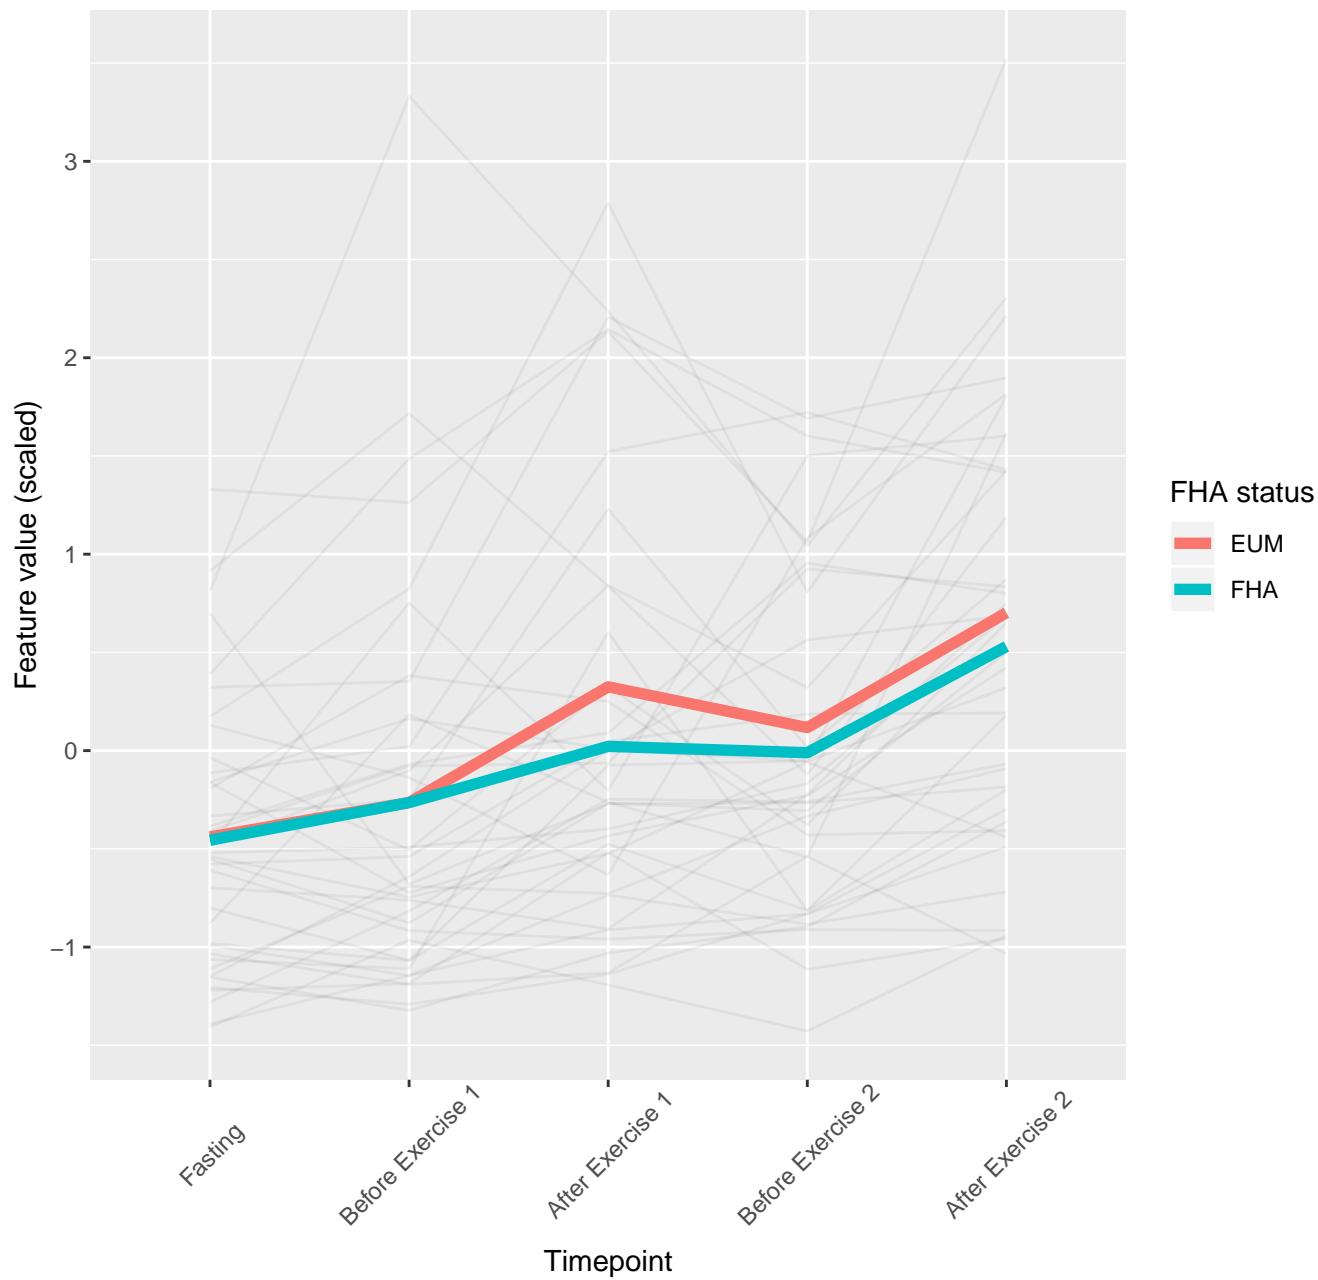

Line plot of TG(14:0/18:2/18:2)

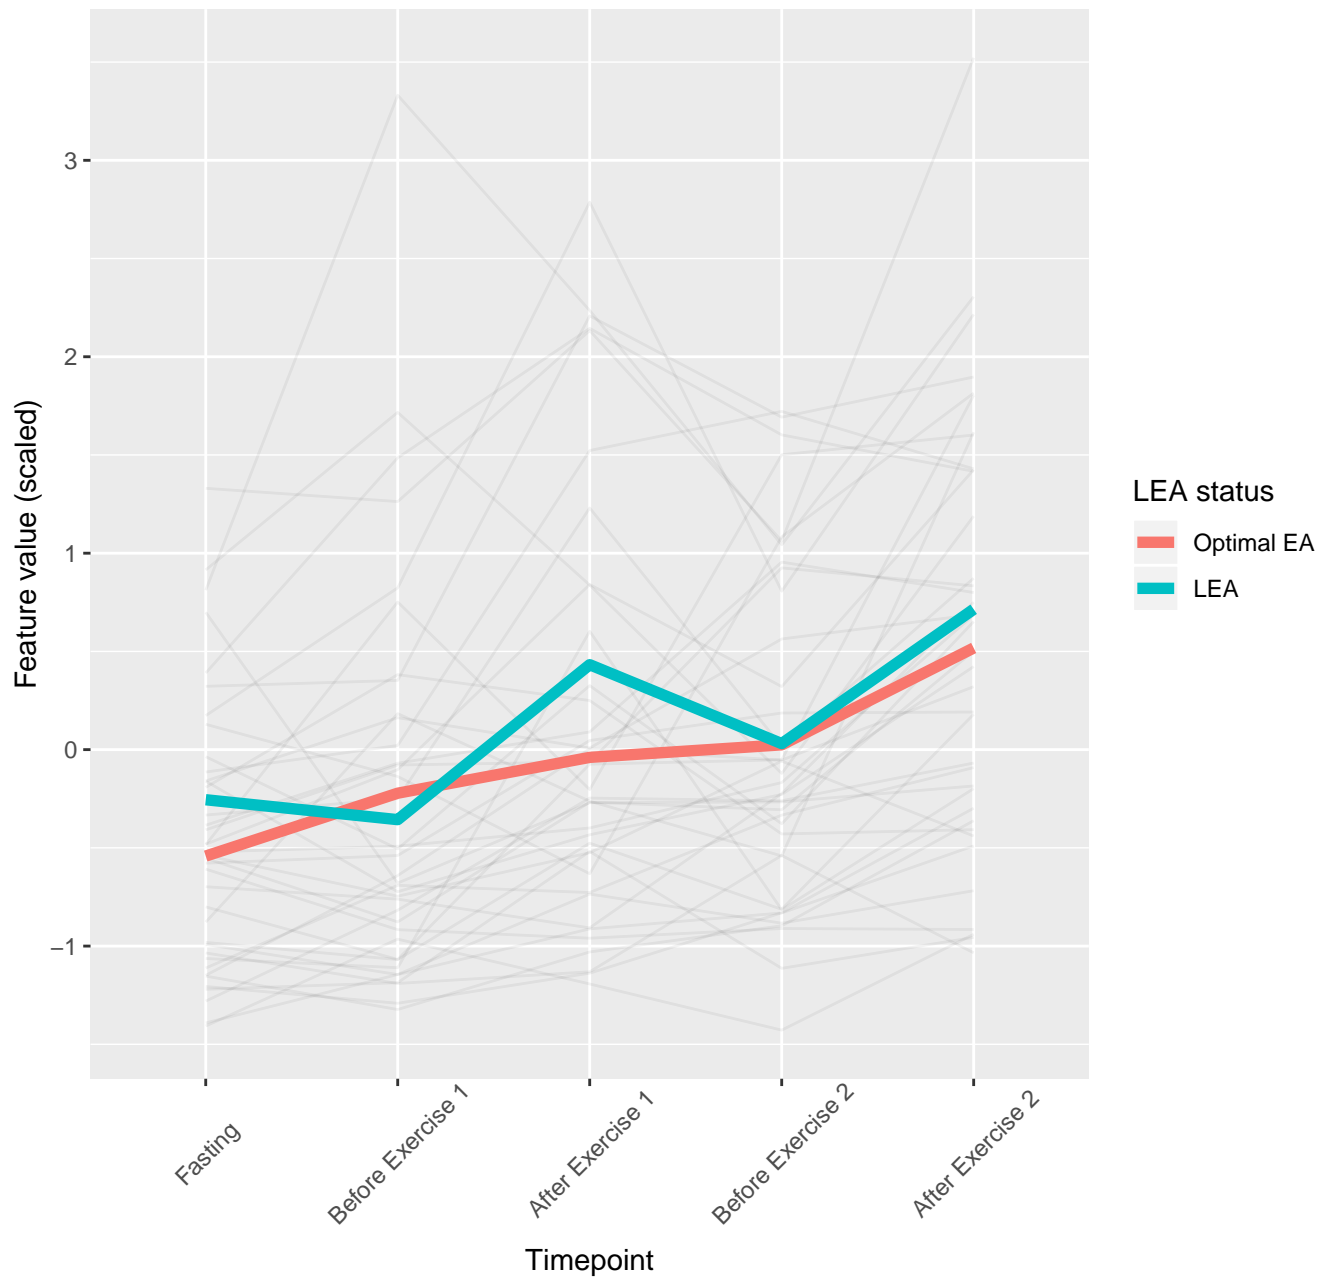

Line plot of TG(16:0/18:0/18:1)

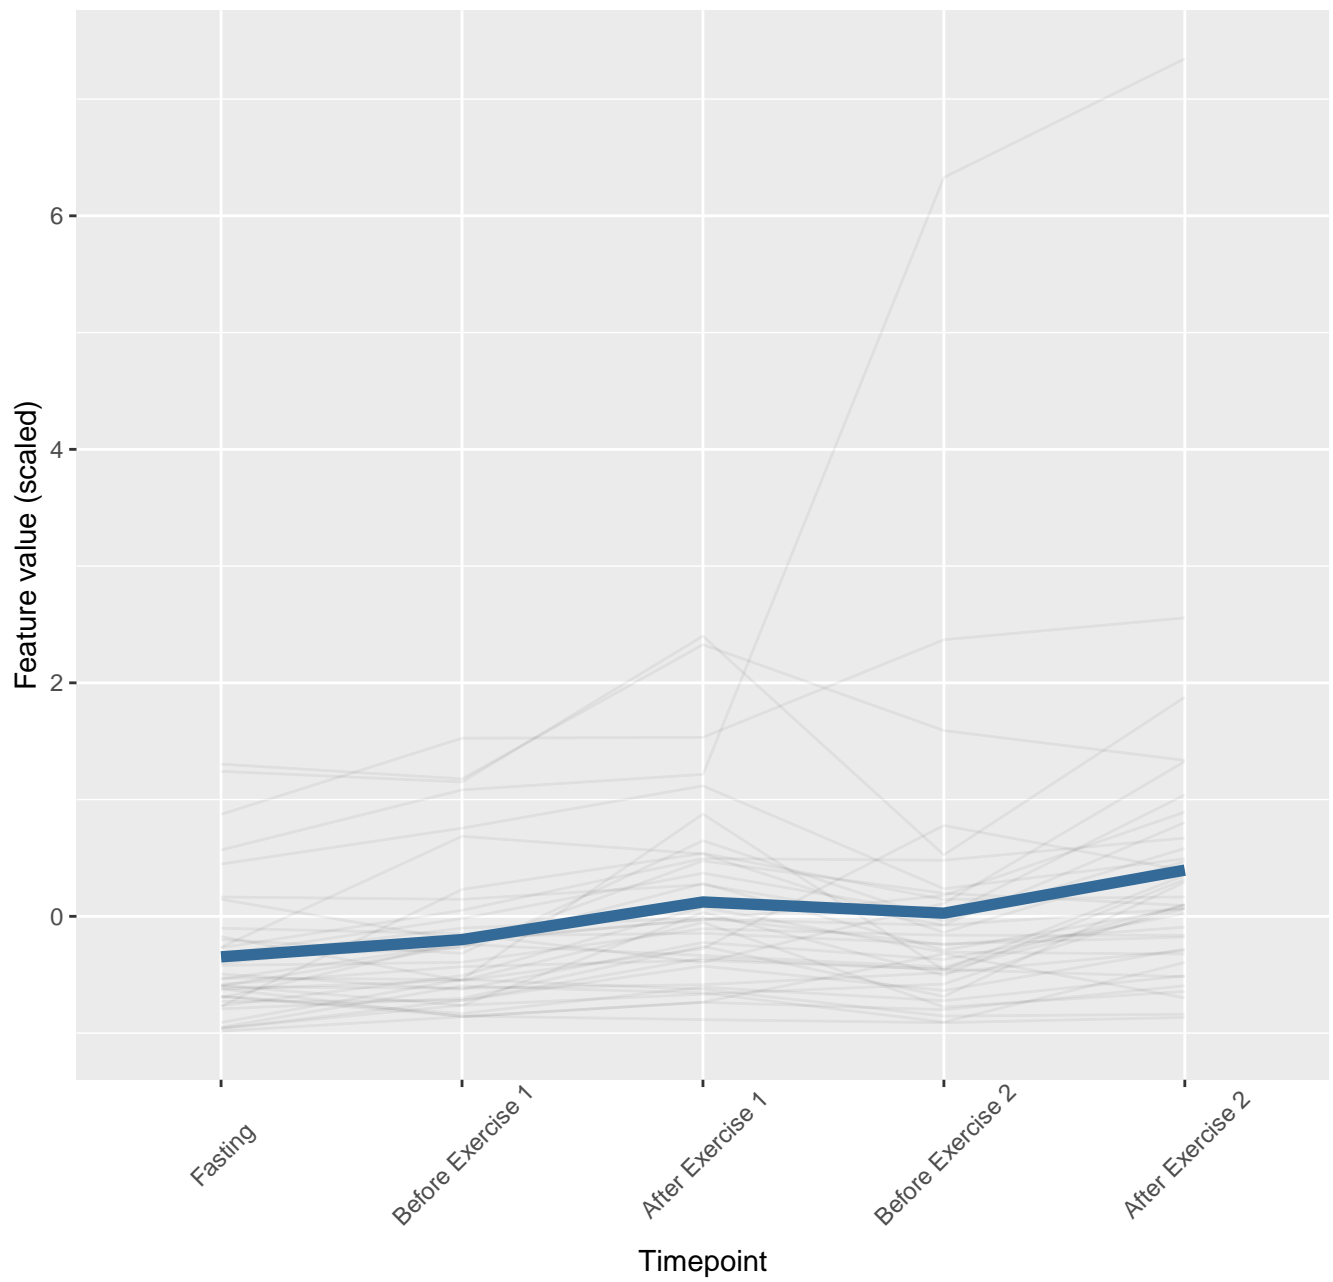

Line plot of TG(16:0/18:0/18:1)

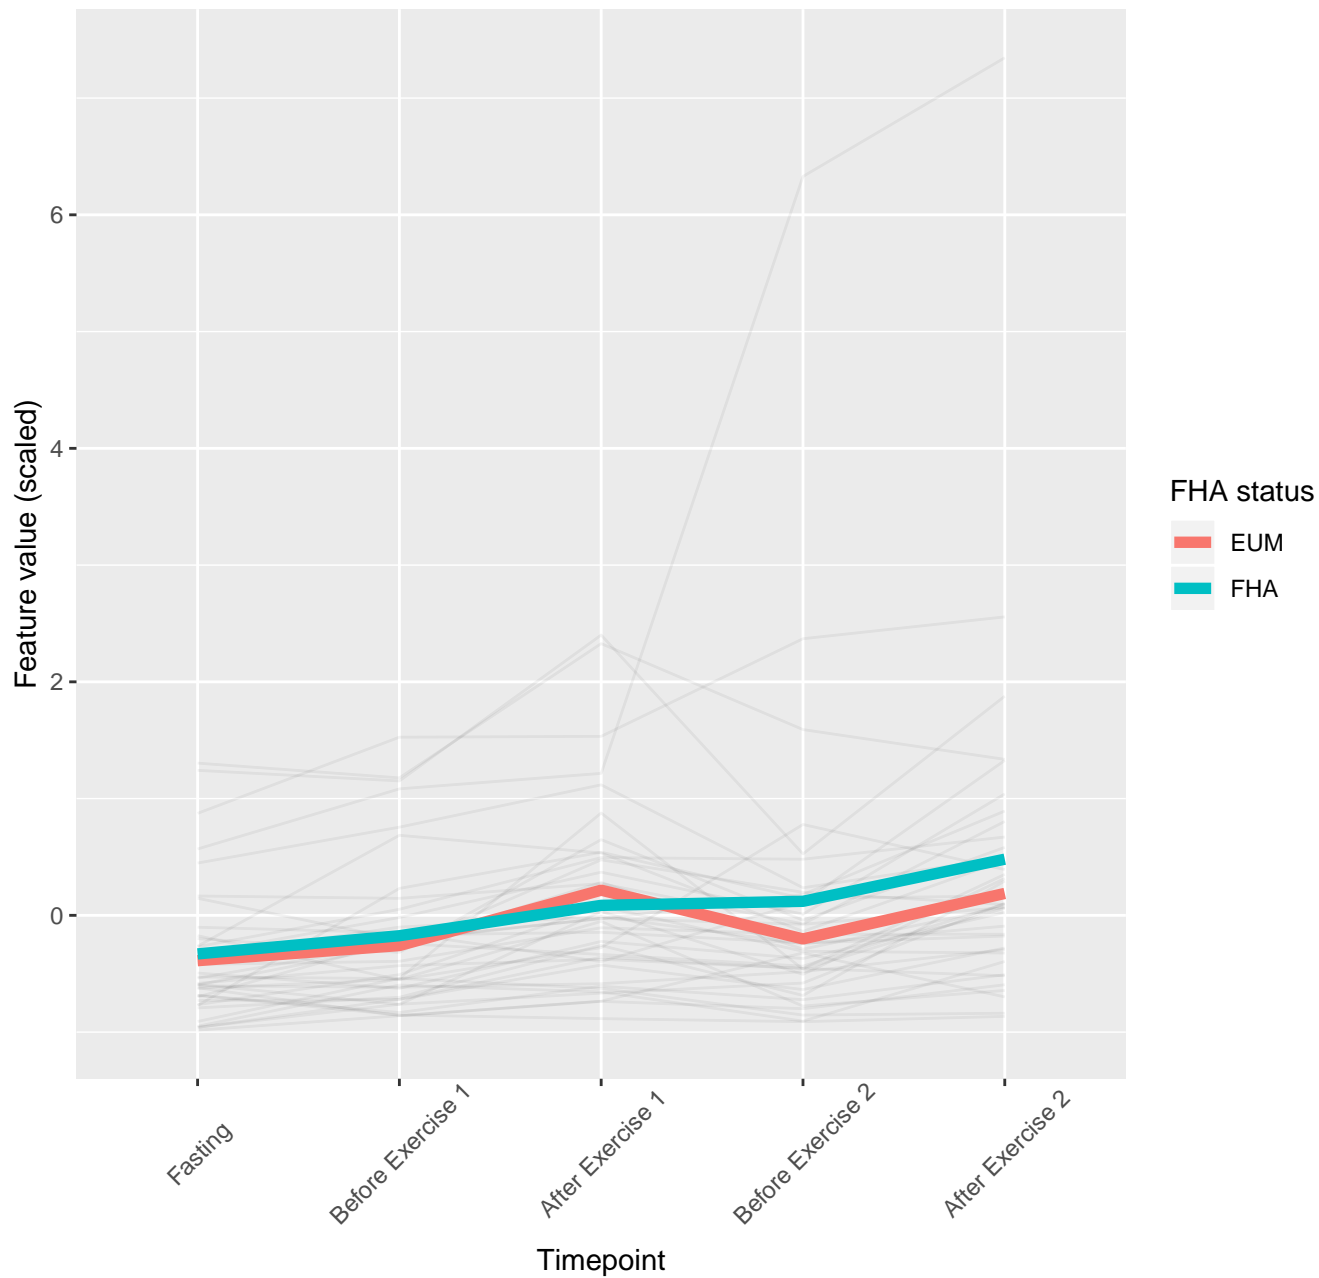

Line plot of TG(16:0/18:0/18:1)

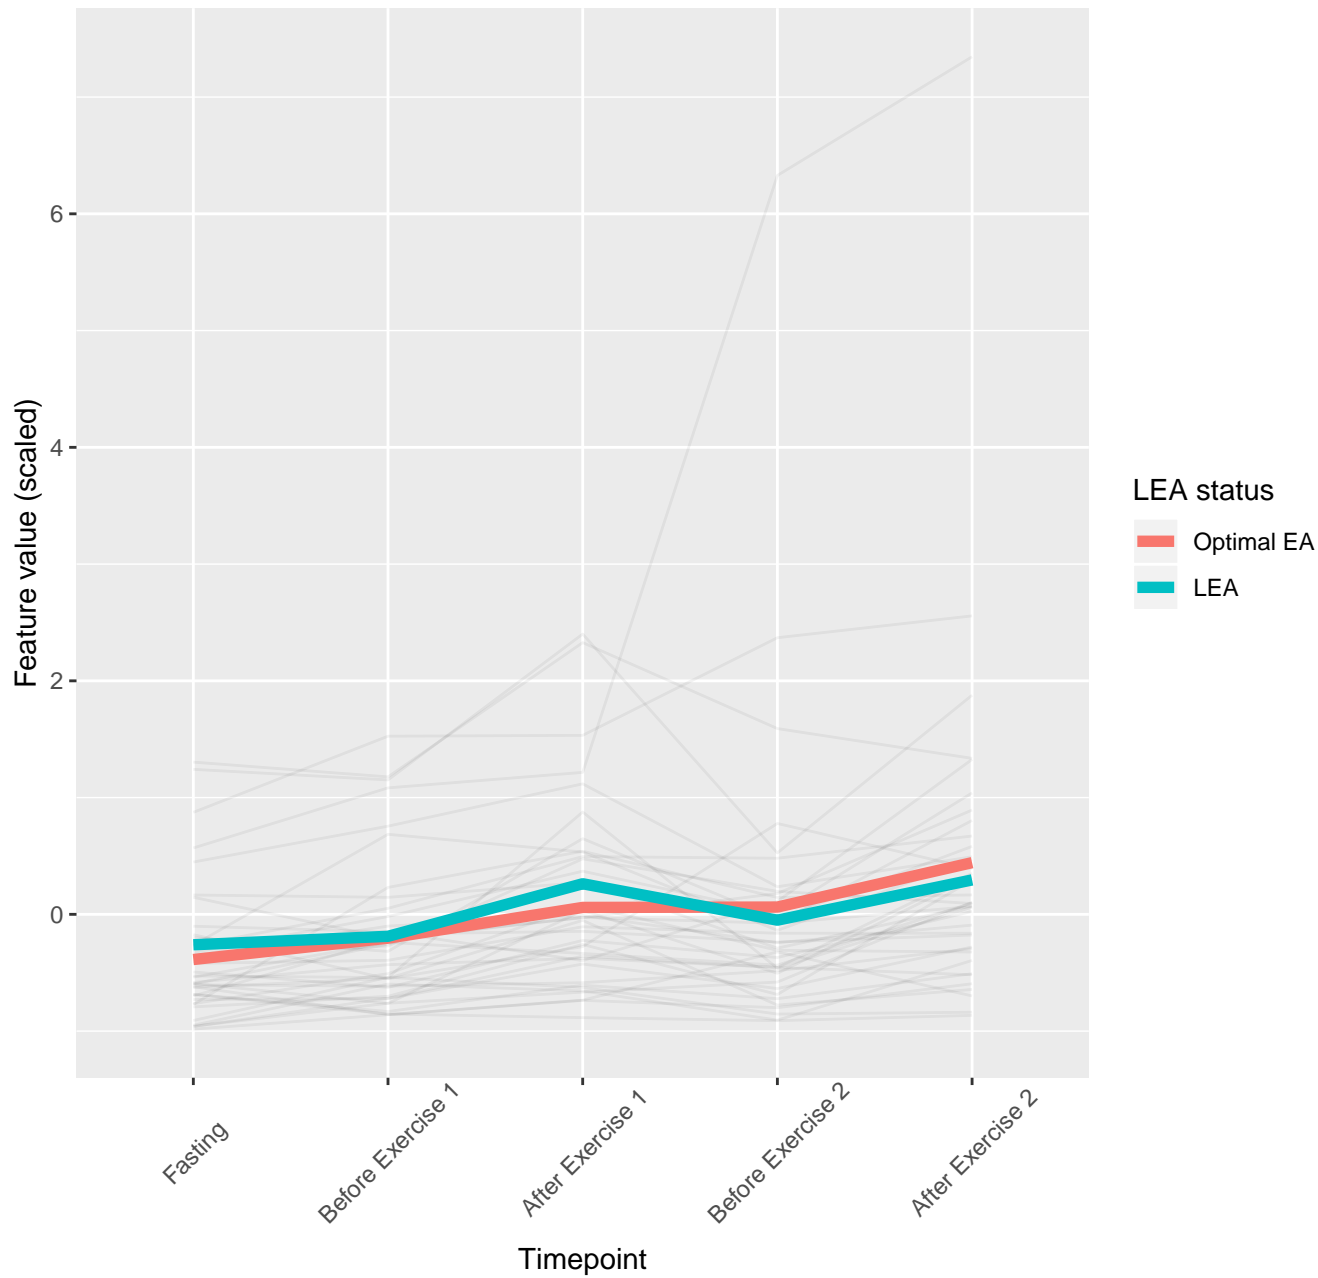

Line plot of TG(16:0/18:2/18:2)

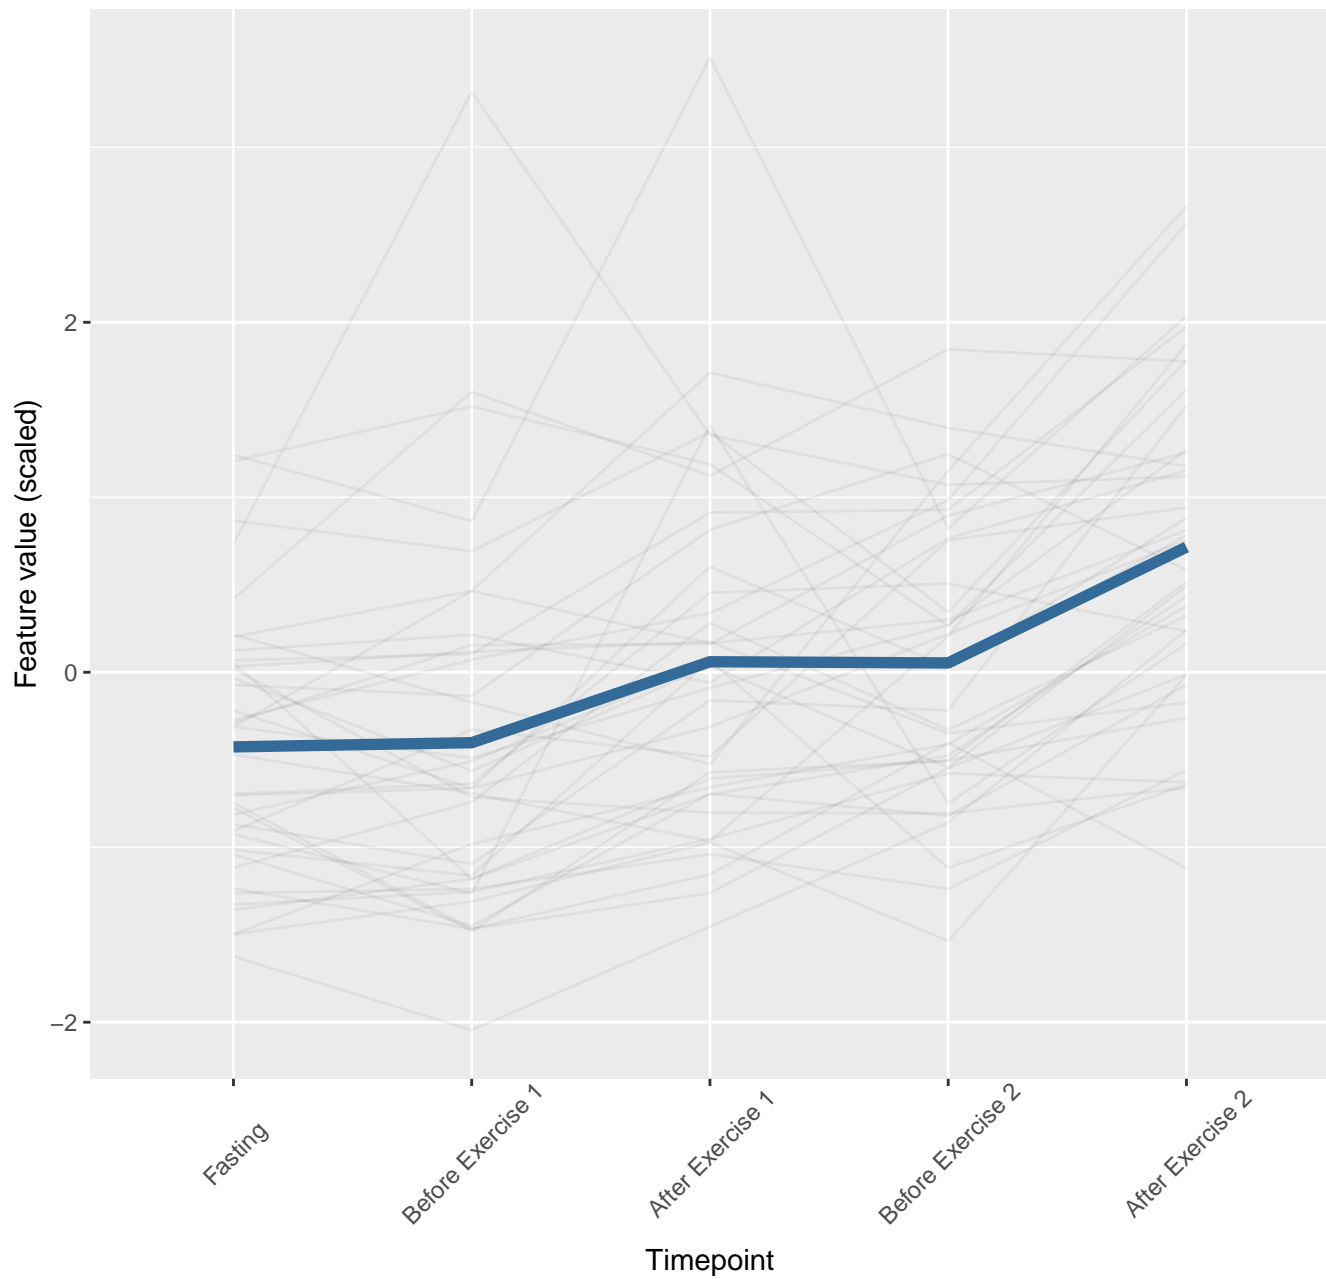

Line plot of TG(16:0/18:2/18:2)

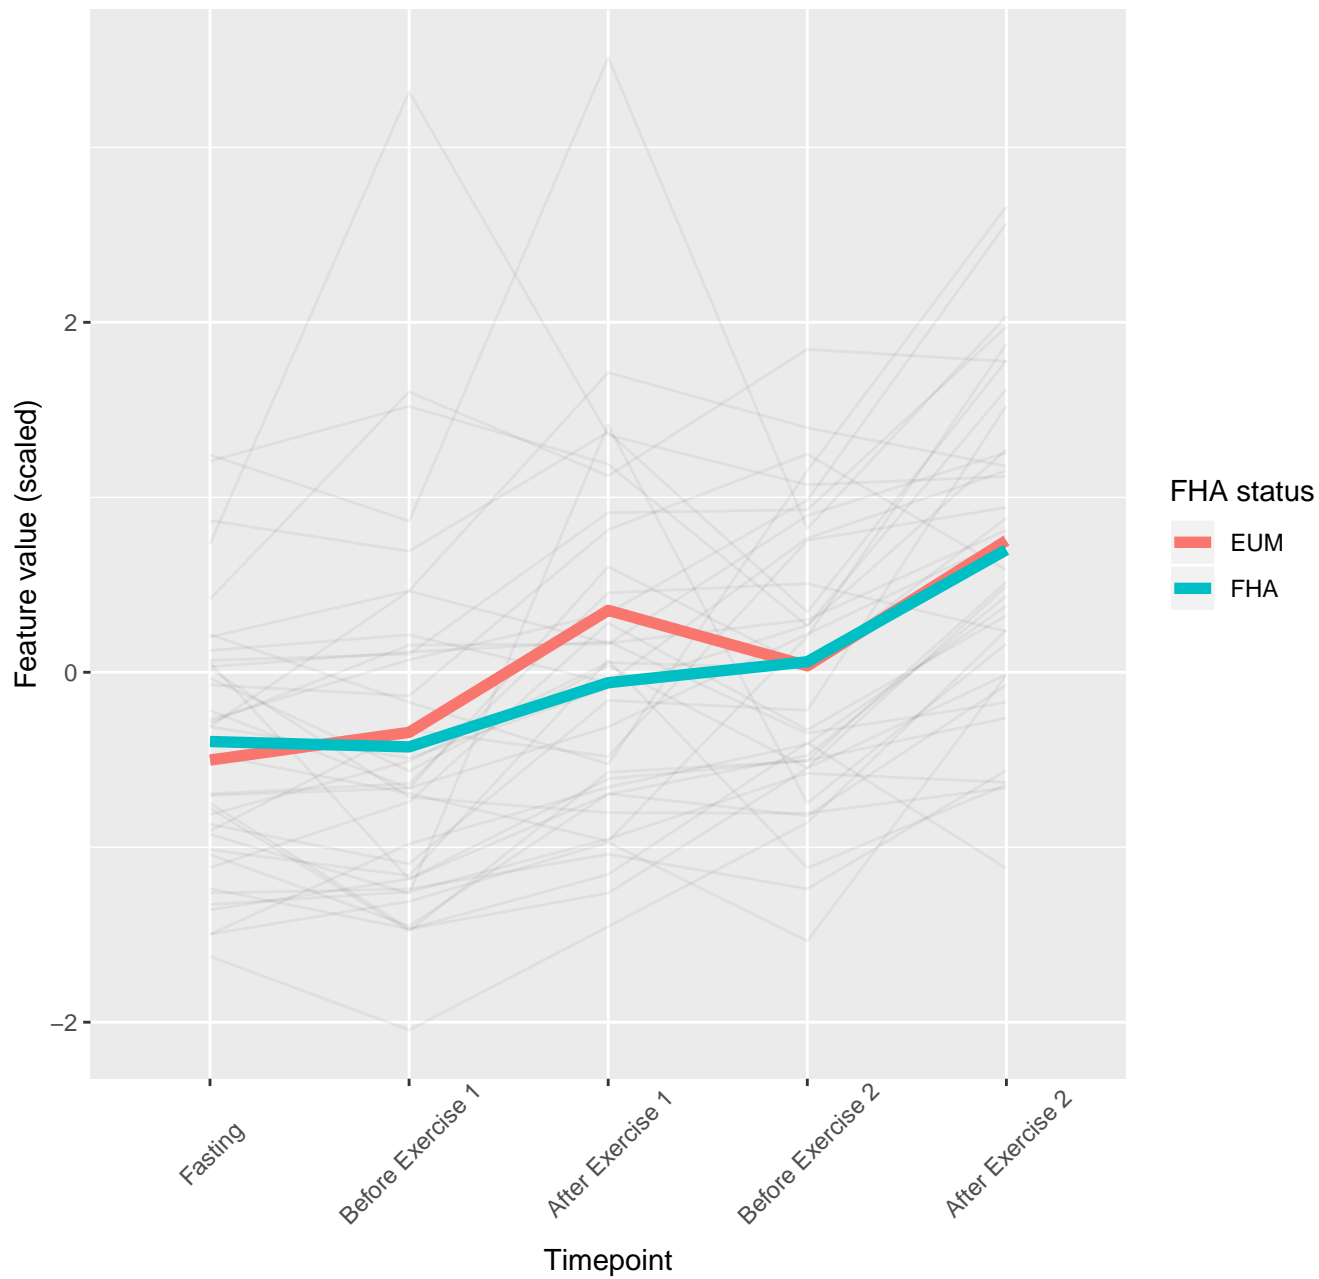

Line plot of TG(16:0/18:2/18:2)

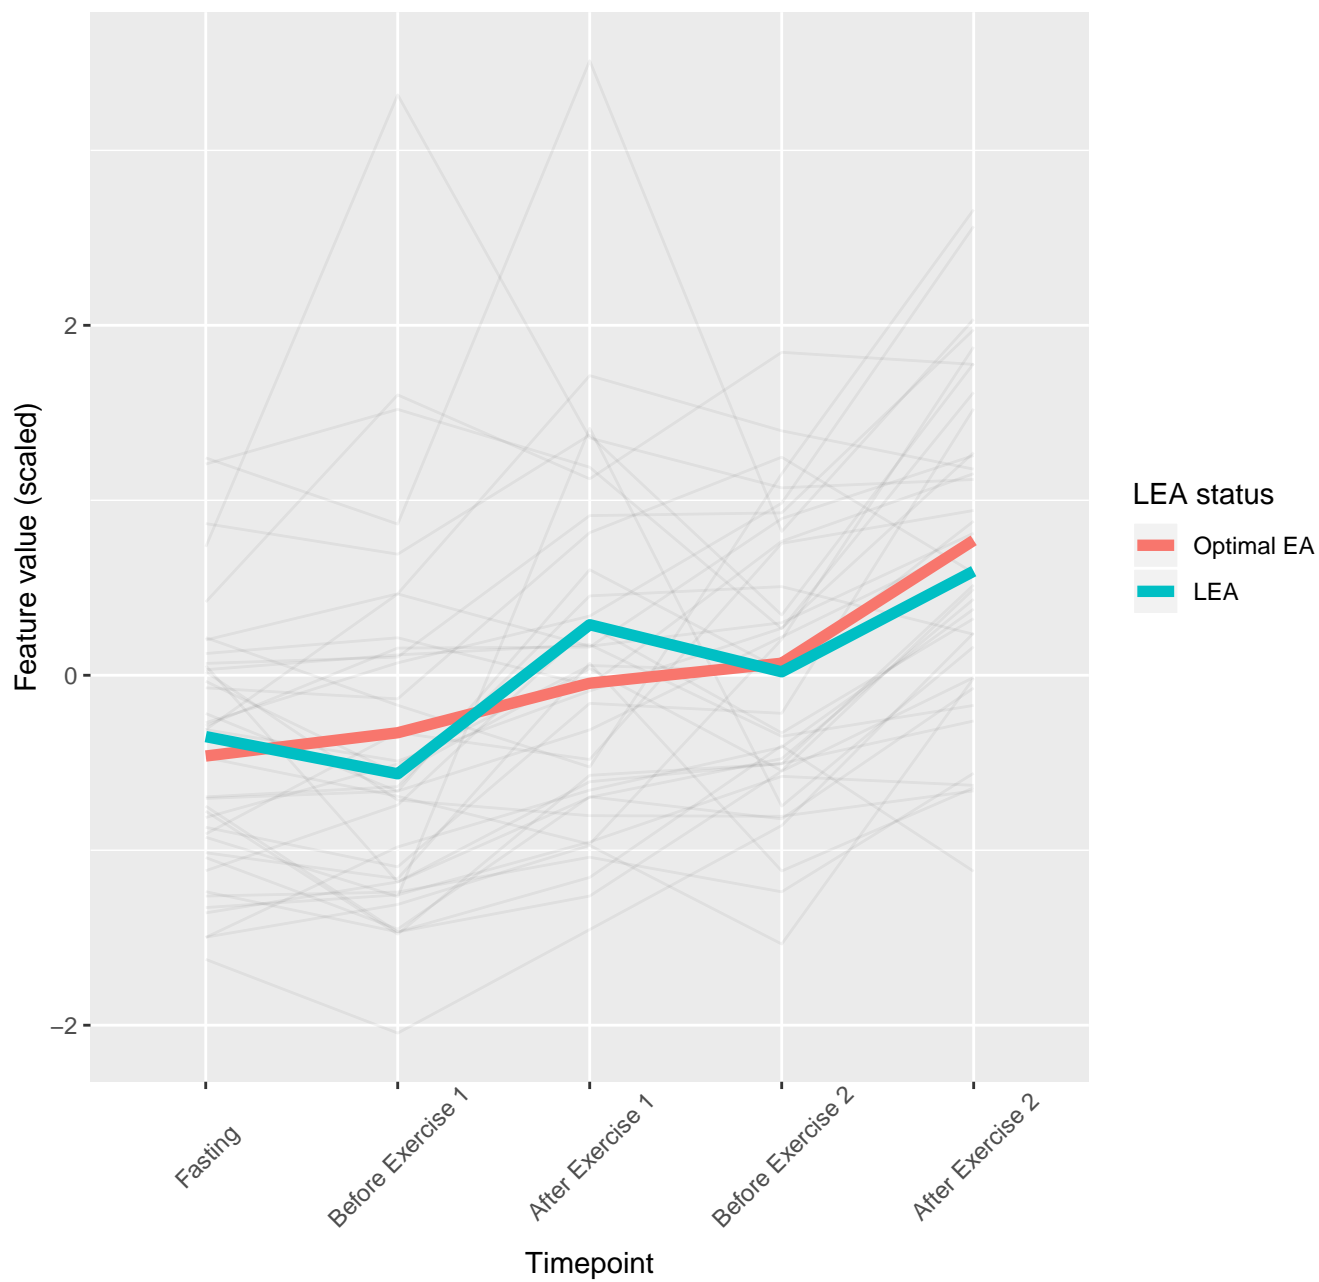



Line plot of TG(16:0/18:2/18:3)

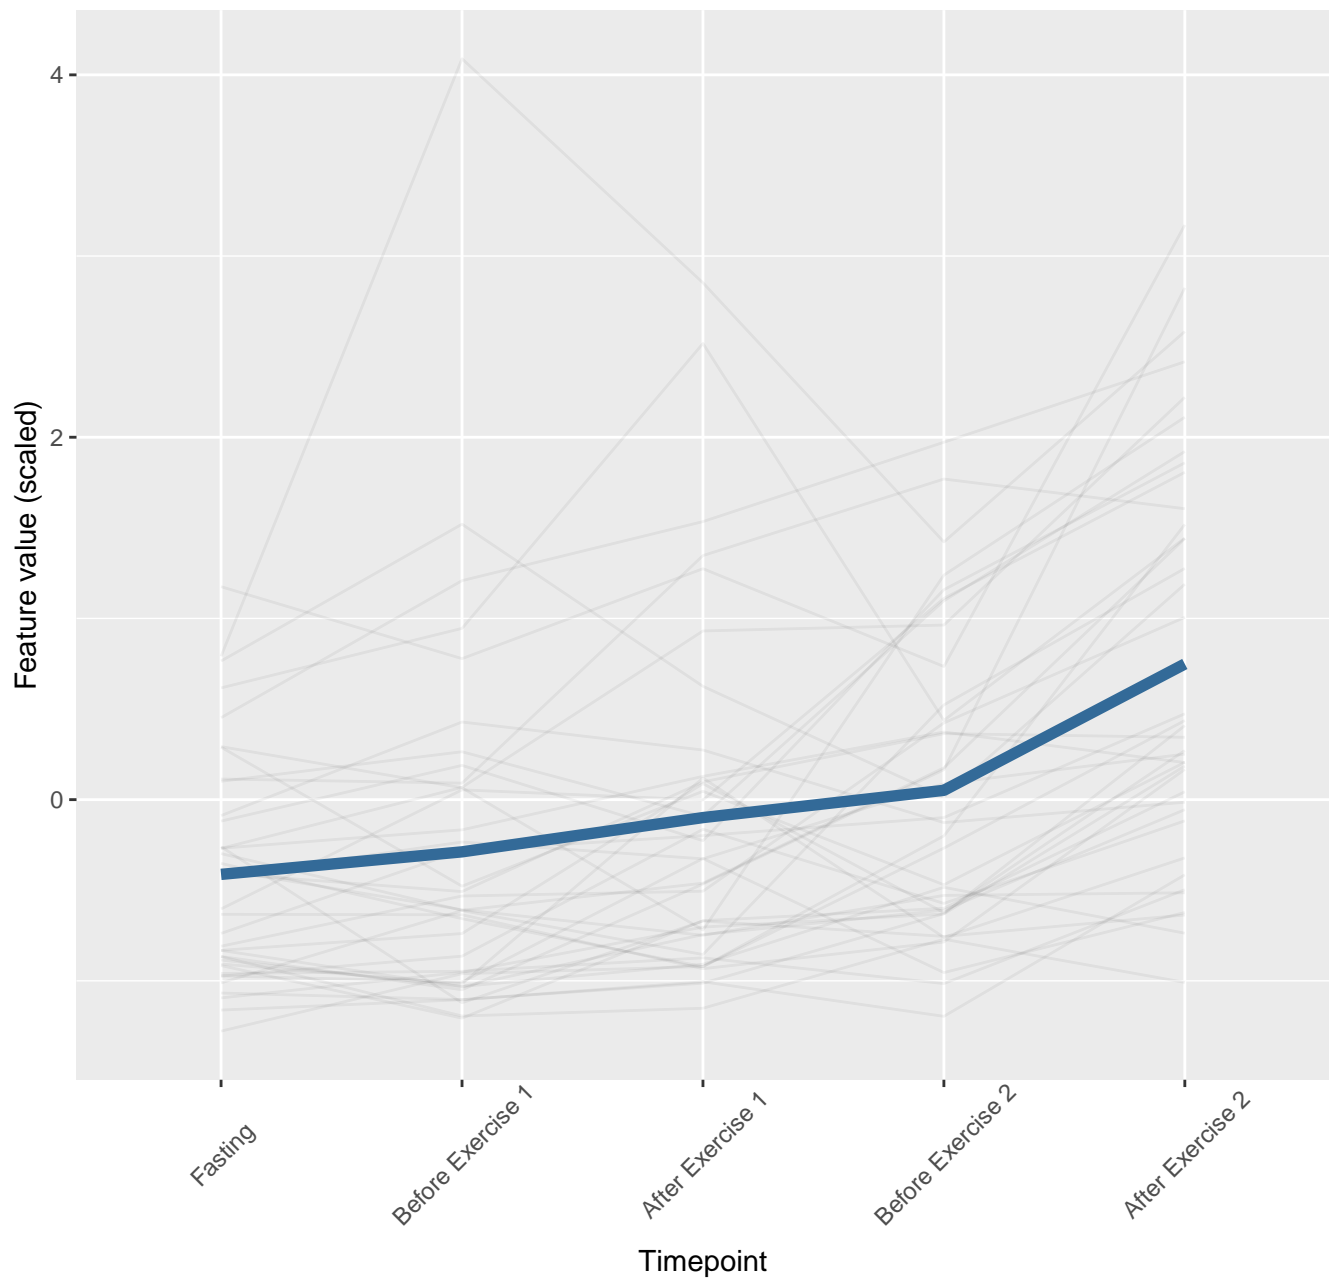

Line plot of TG(16:0/18:2/18:3)

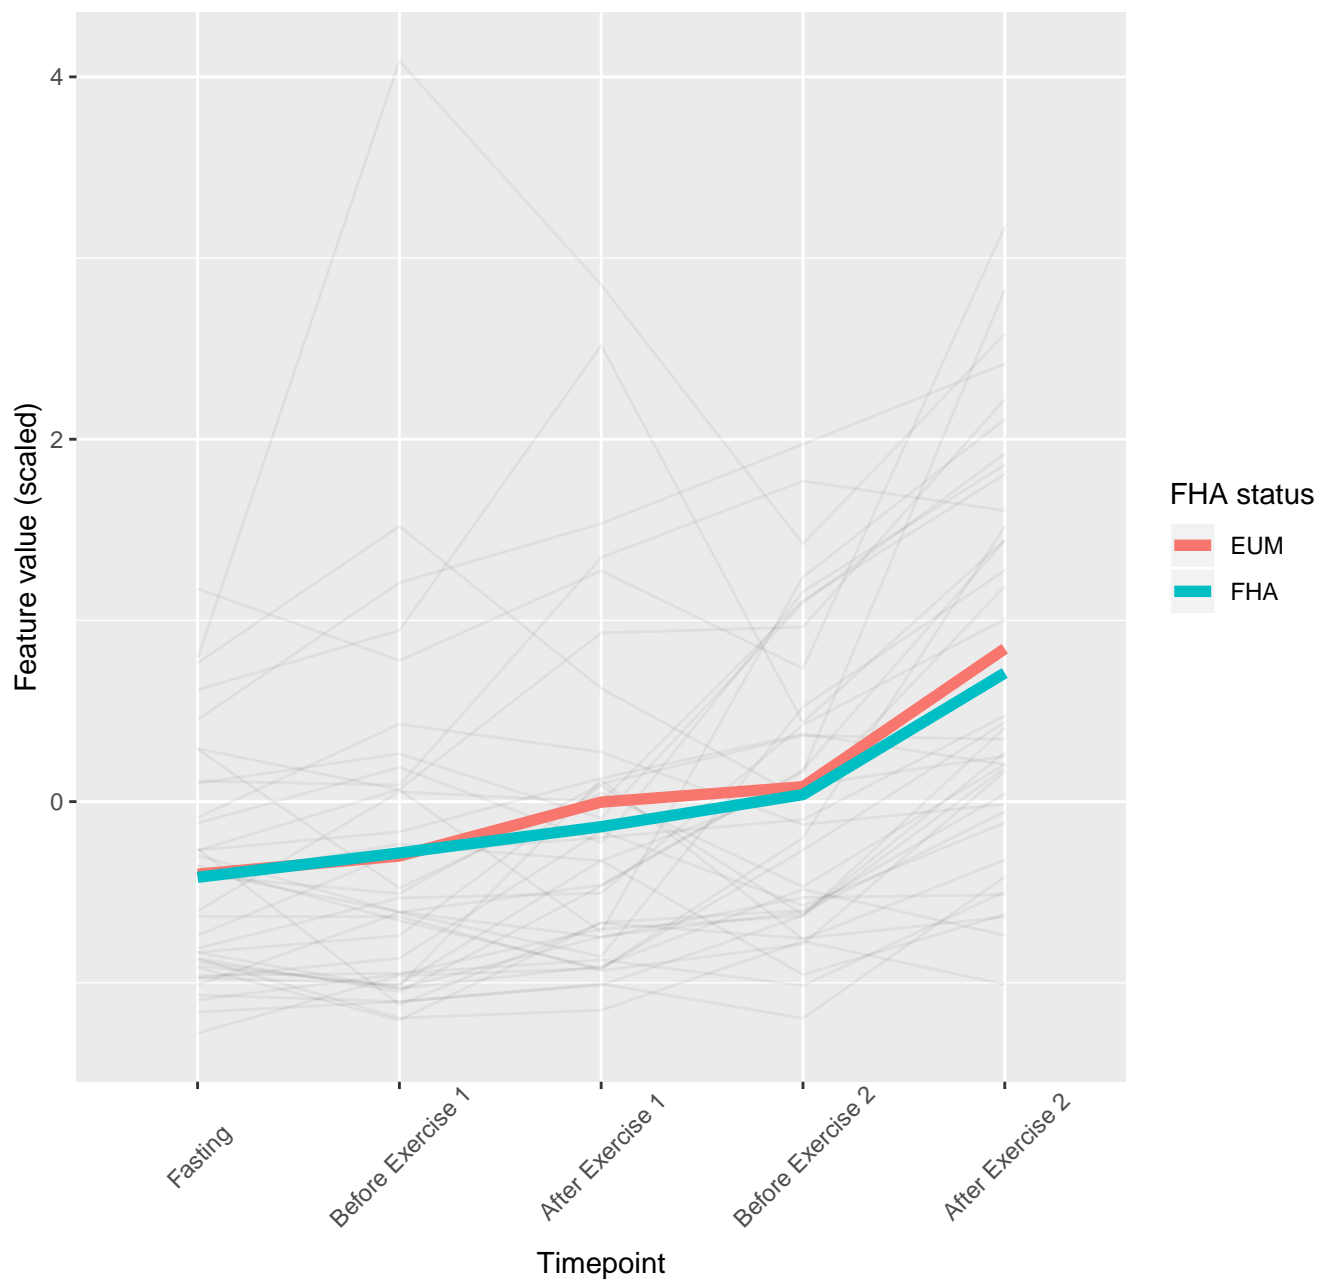

Line plot of TG(16:0/18:2/18:3)

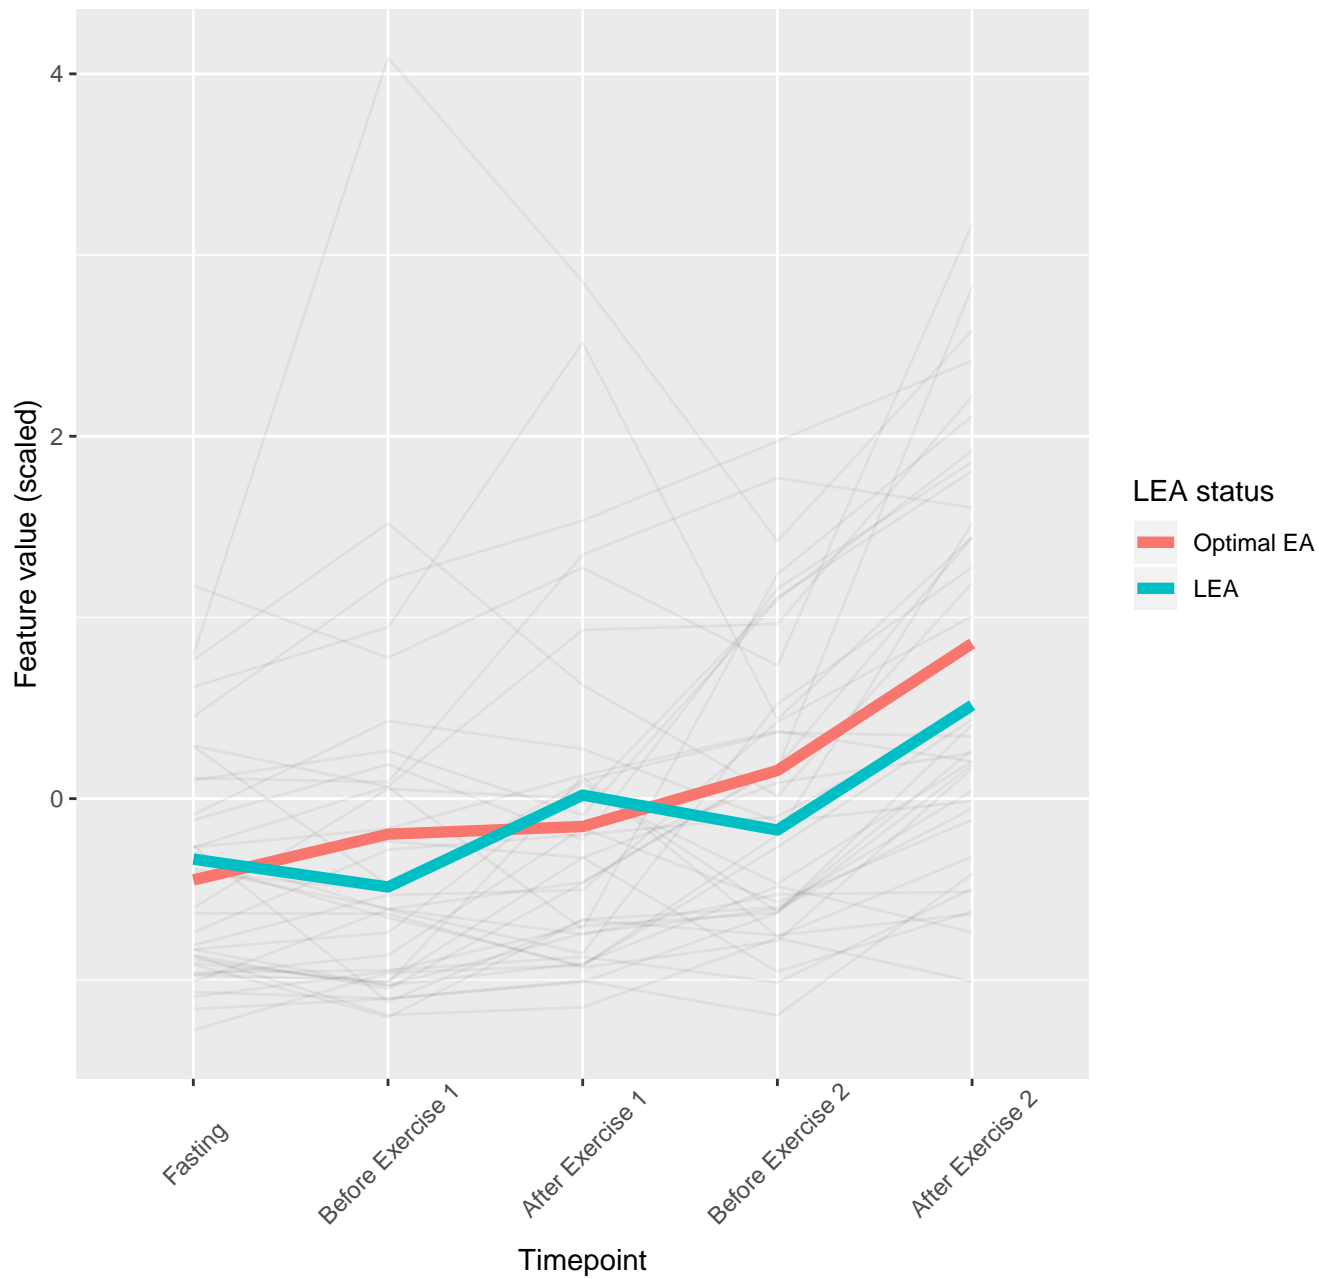

Line plot of TG(16:0/18:2/22:6)

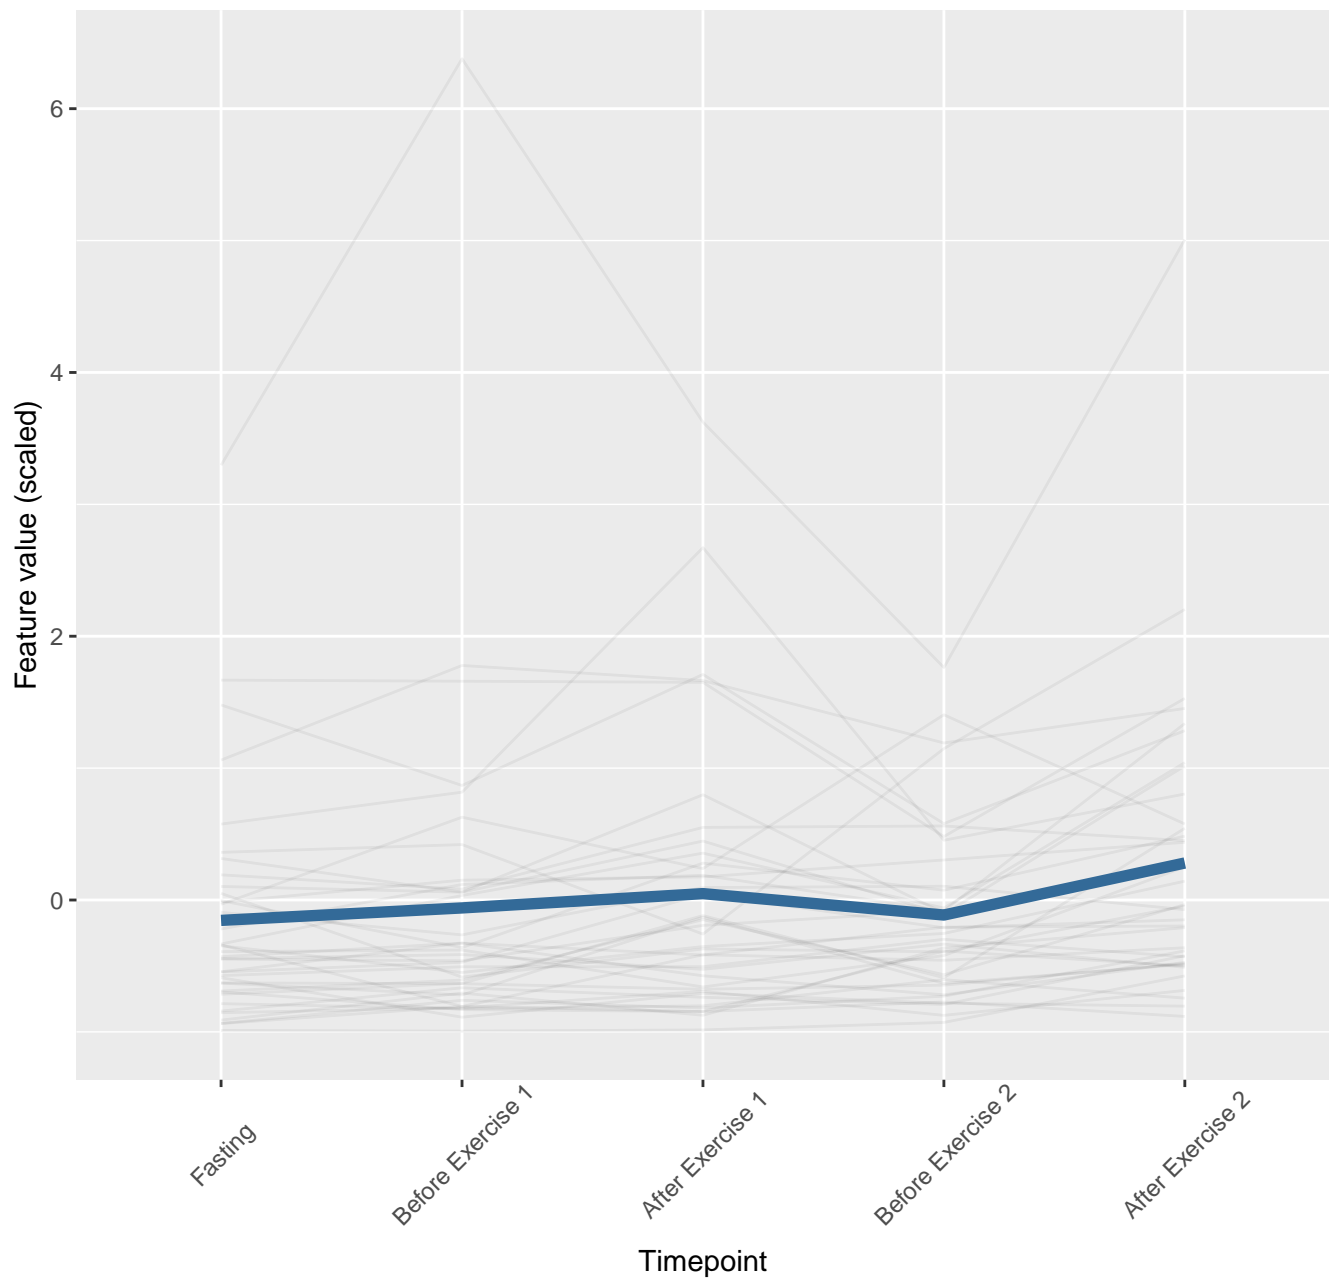

Line plot of TG(16:0/18:2/22:6)

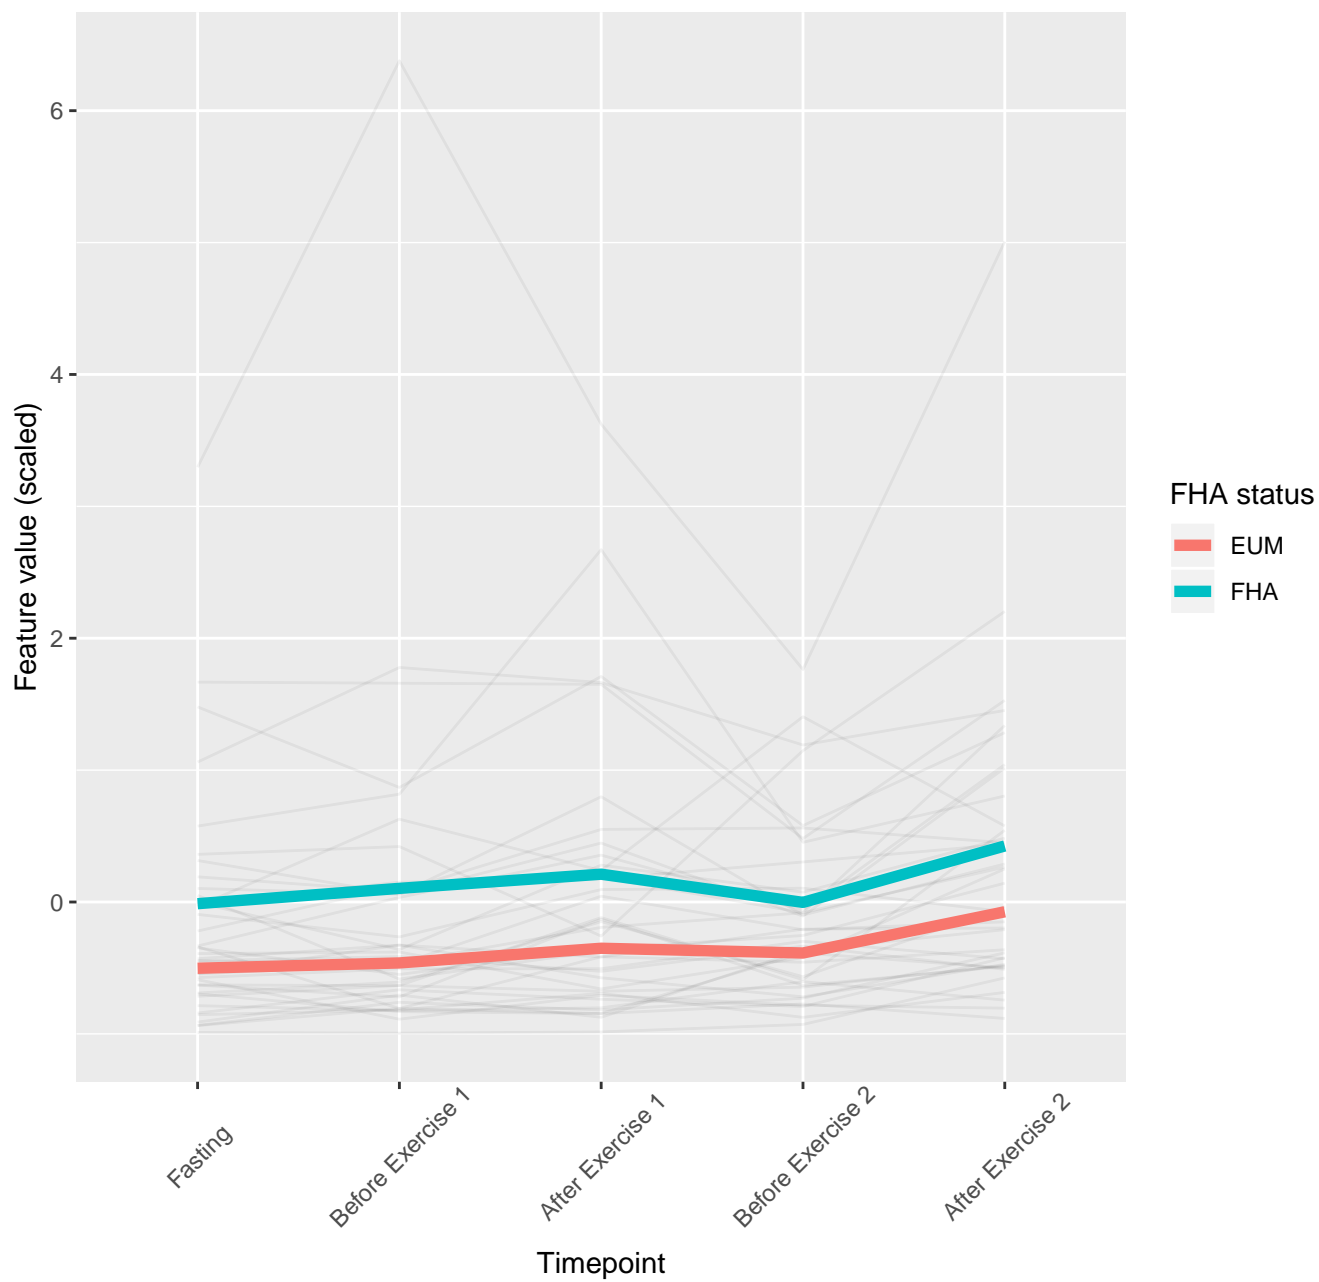

Line plot of TG(16:0/18:2/22:6)

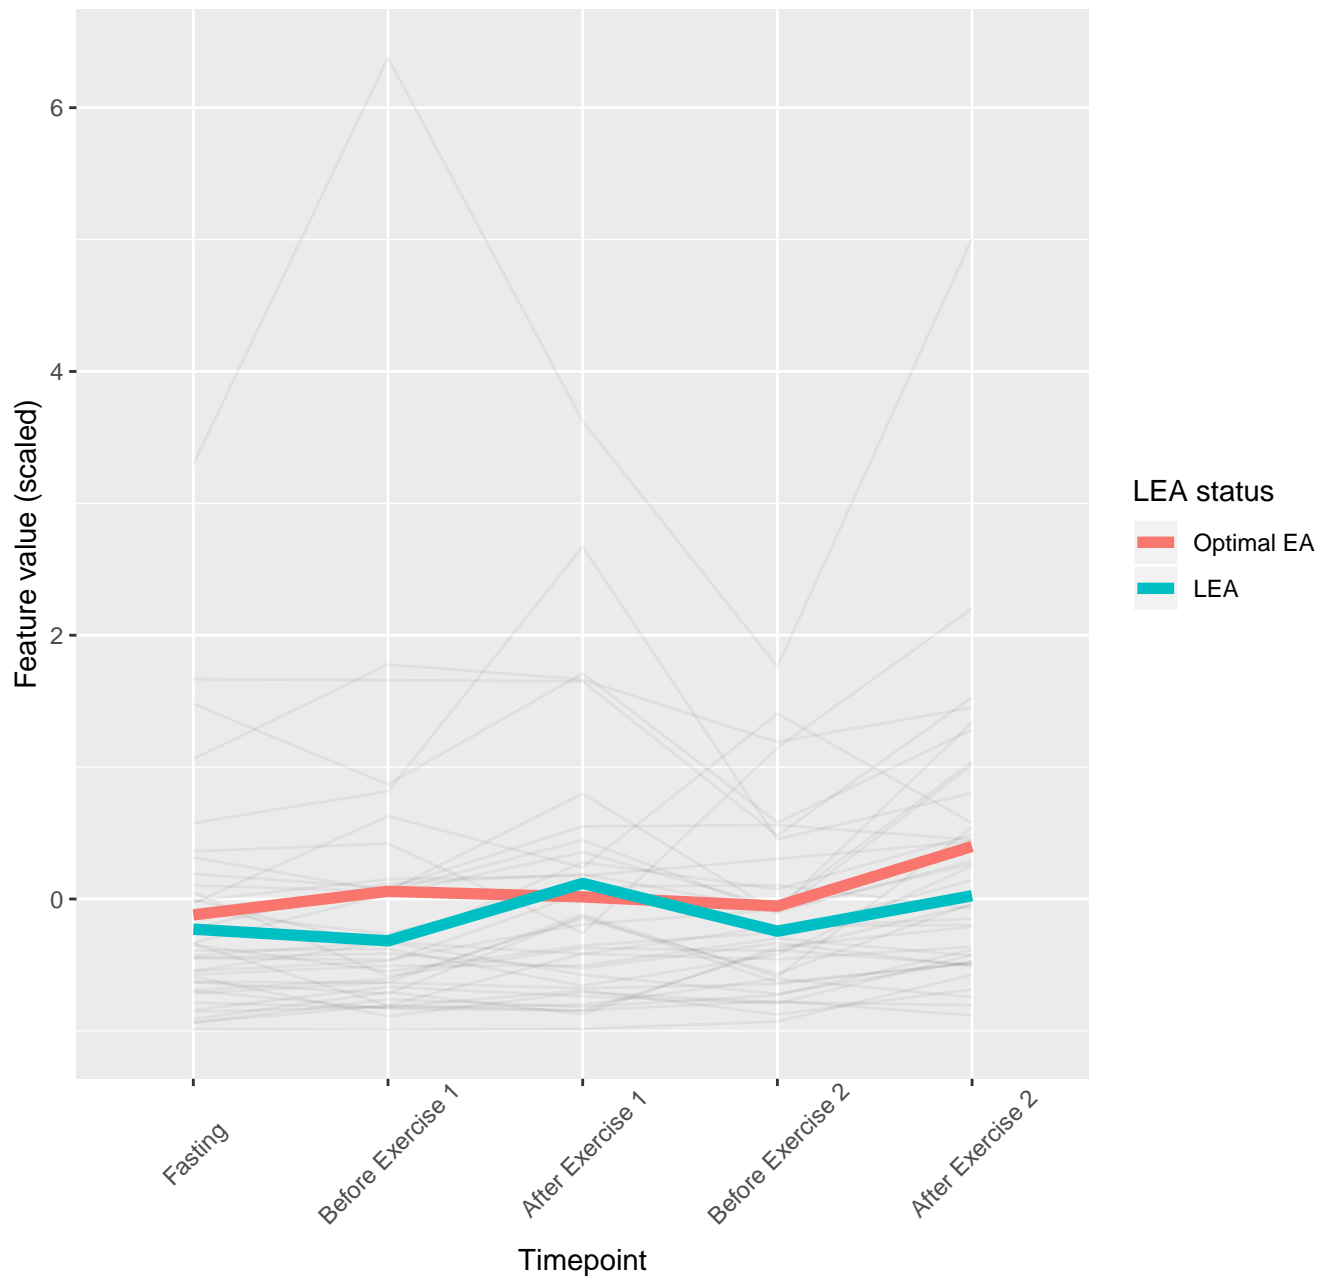

Line plot of TG(16:0/22:5/18:1) or TG(20:4/18:1/18:1)

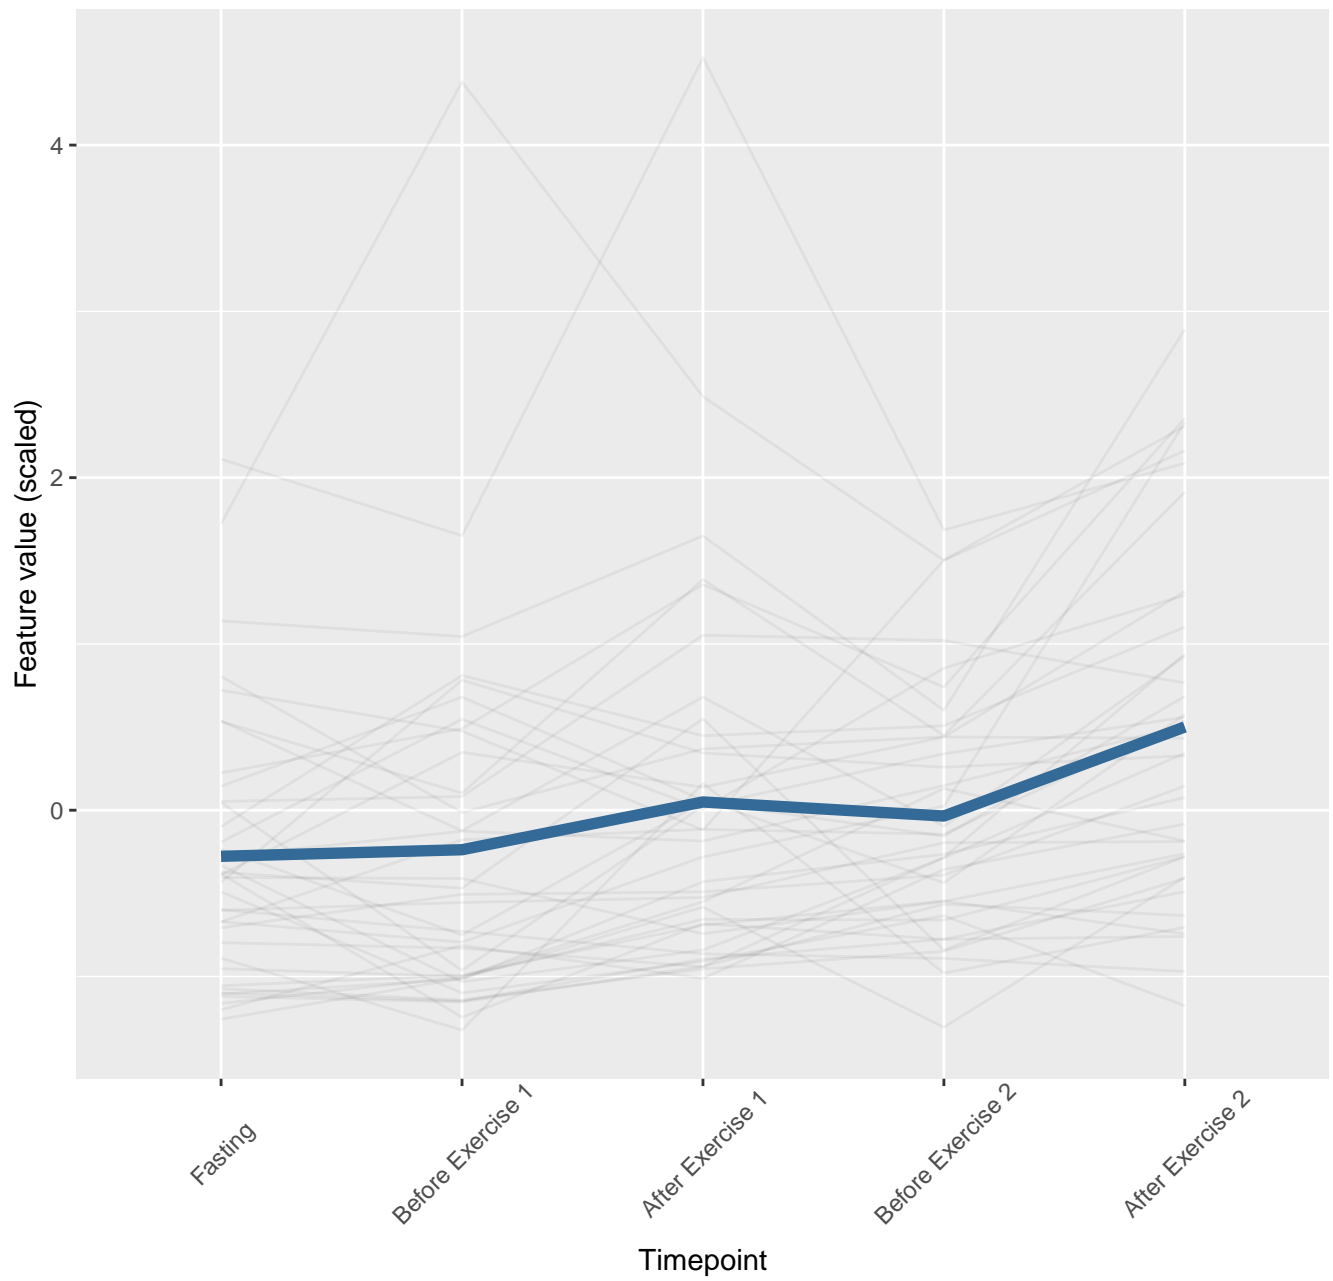

Line plot of TG(16:0/22:5/18:1) or TG(20:4/18:1/18:1)

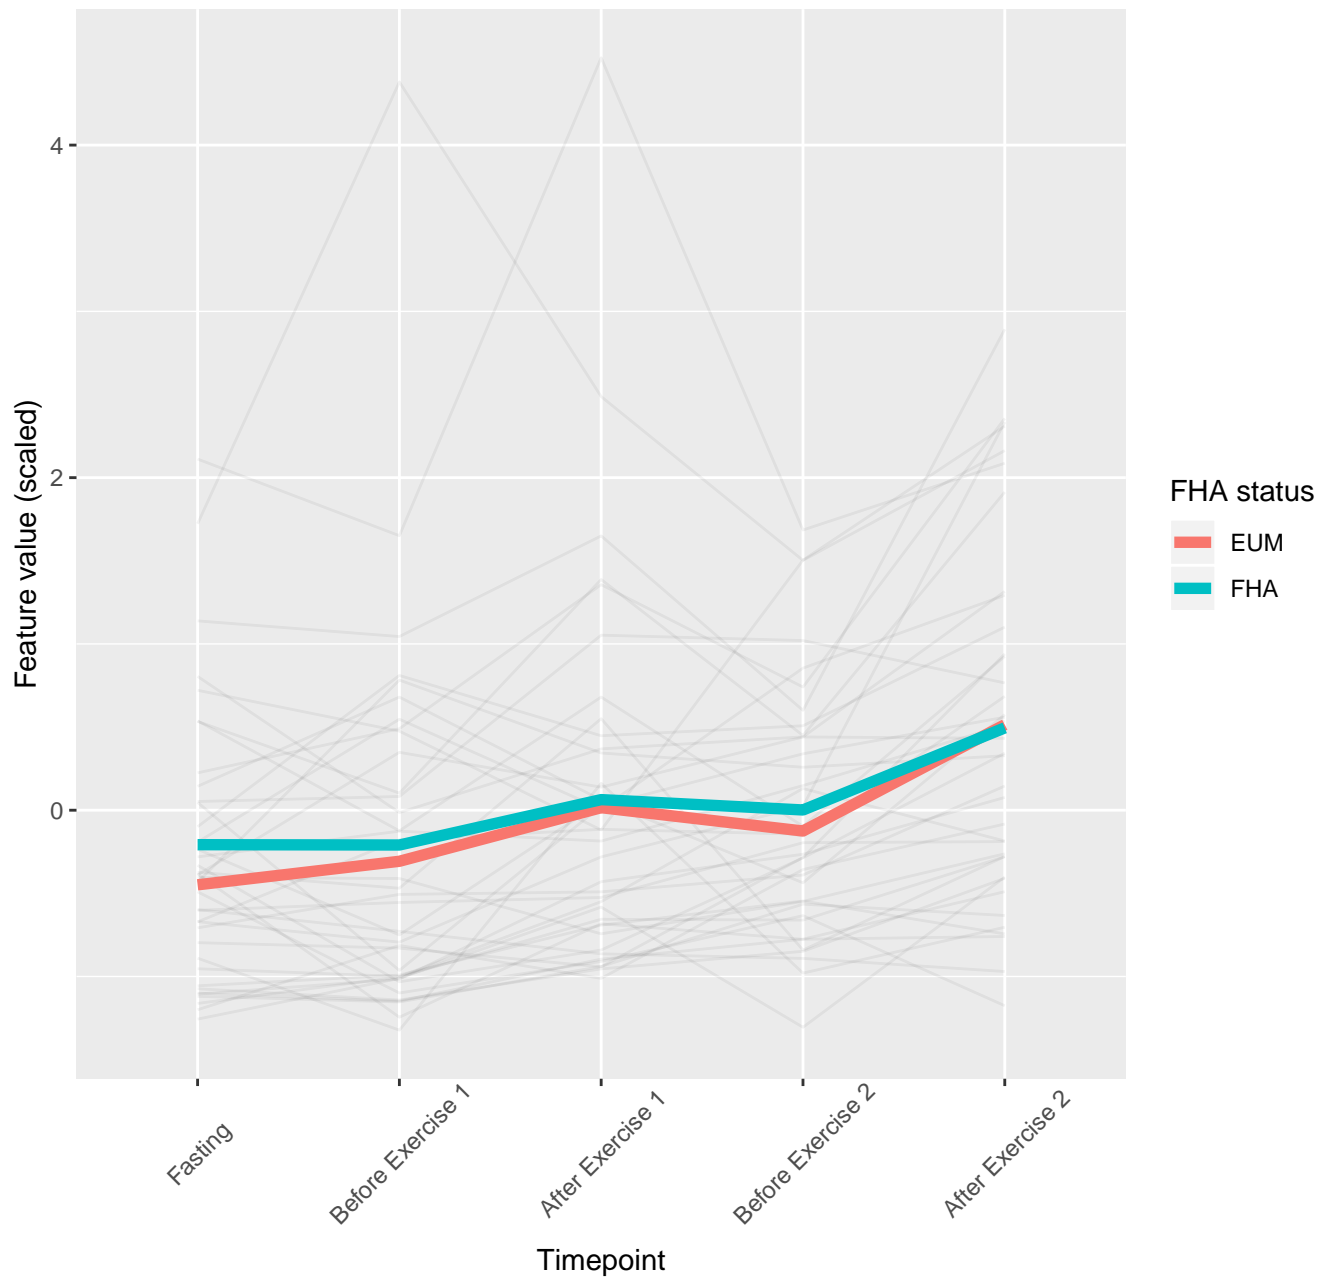



Line plot of TG(16:0/22:5/18:1) or TG(20:4/18:1/18:1)

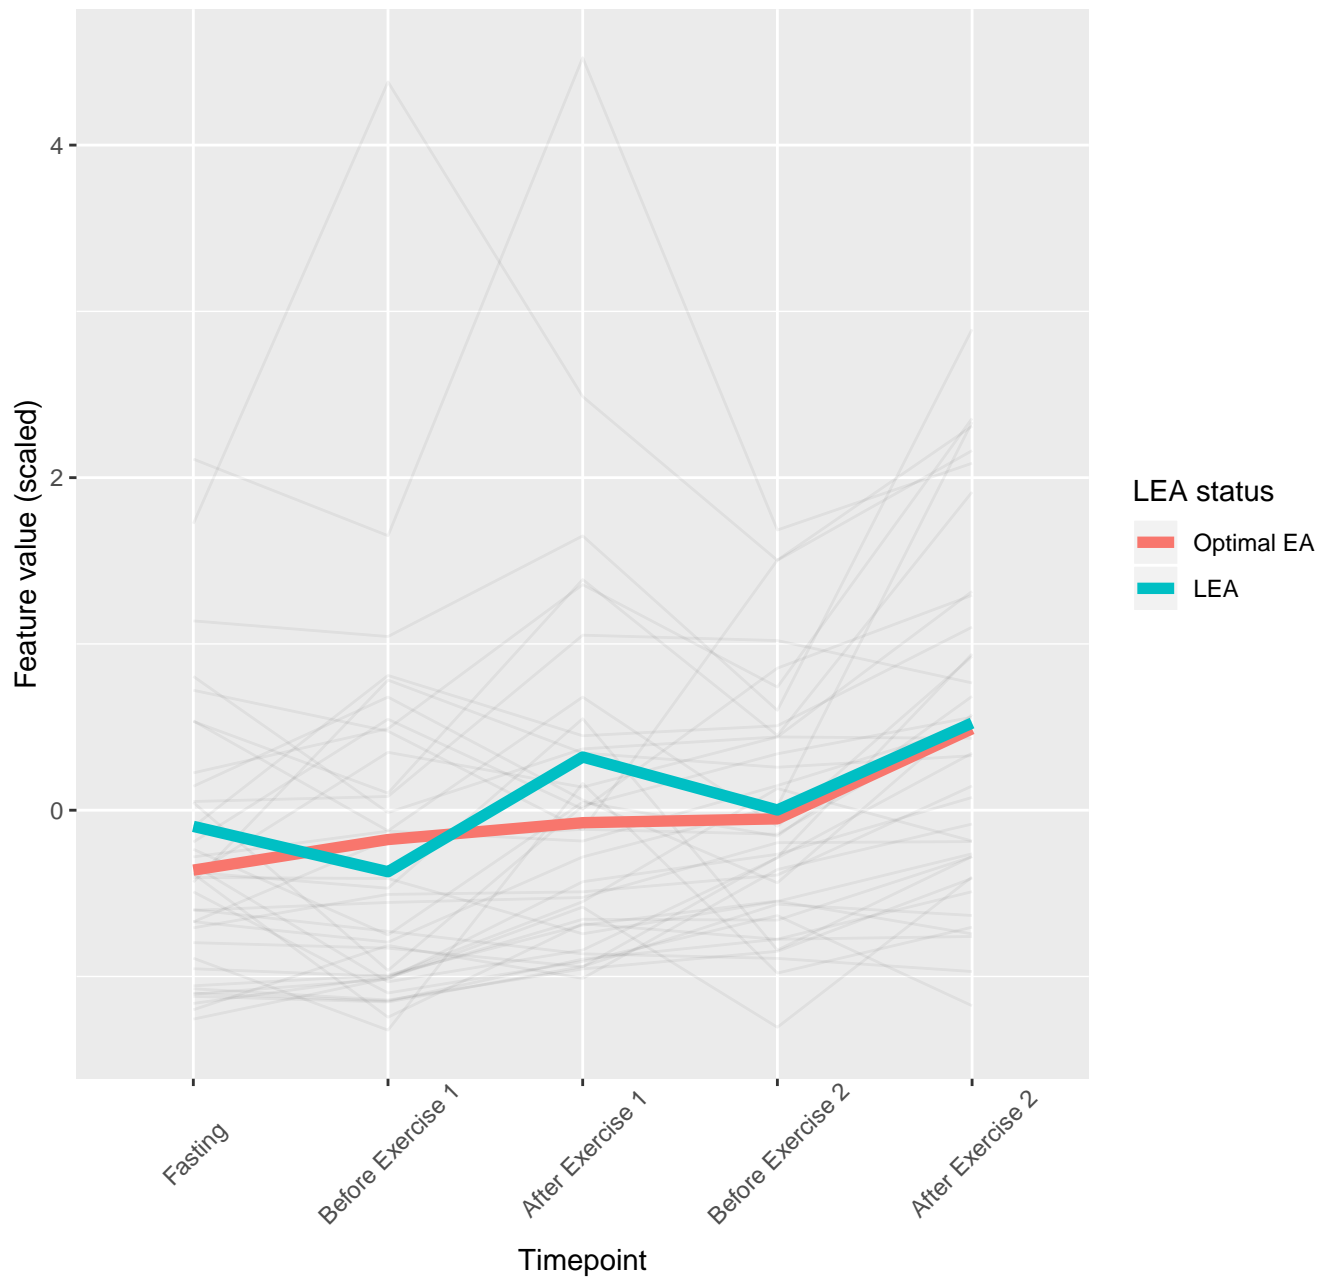

Line plot of TG(18:0/18:1/20:4)

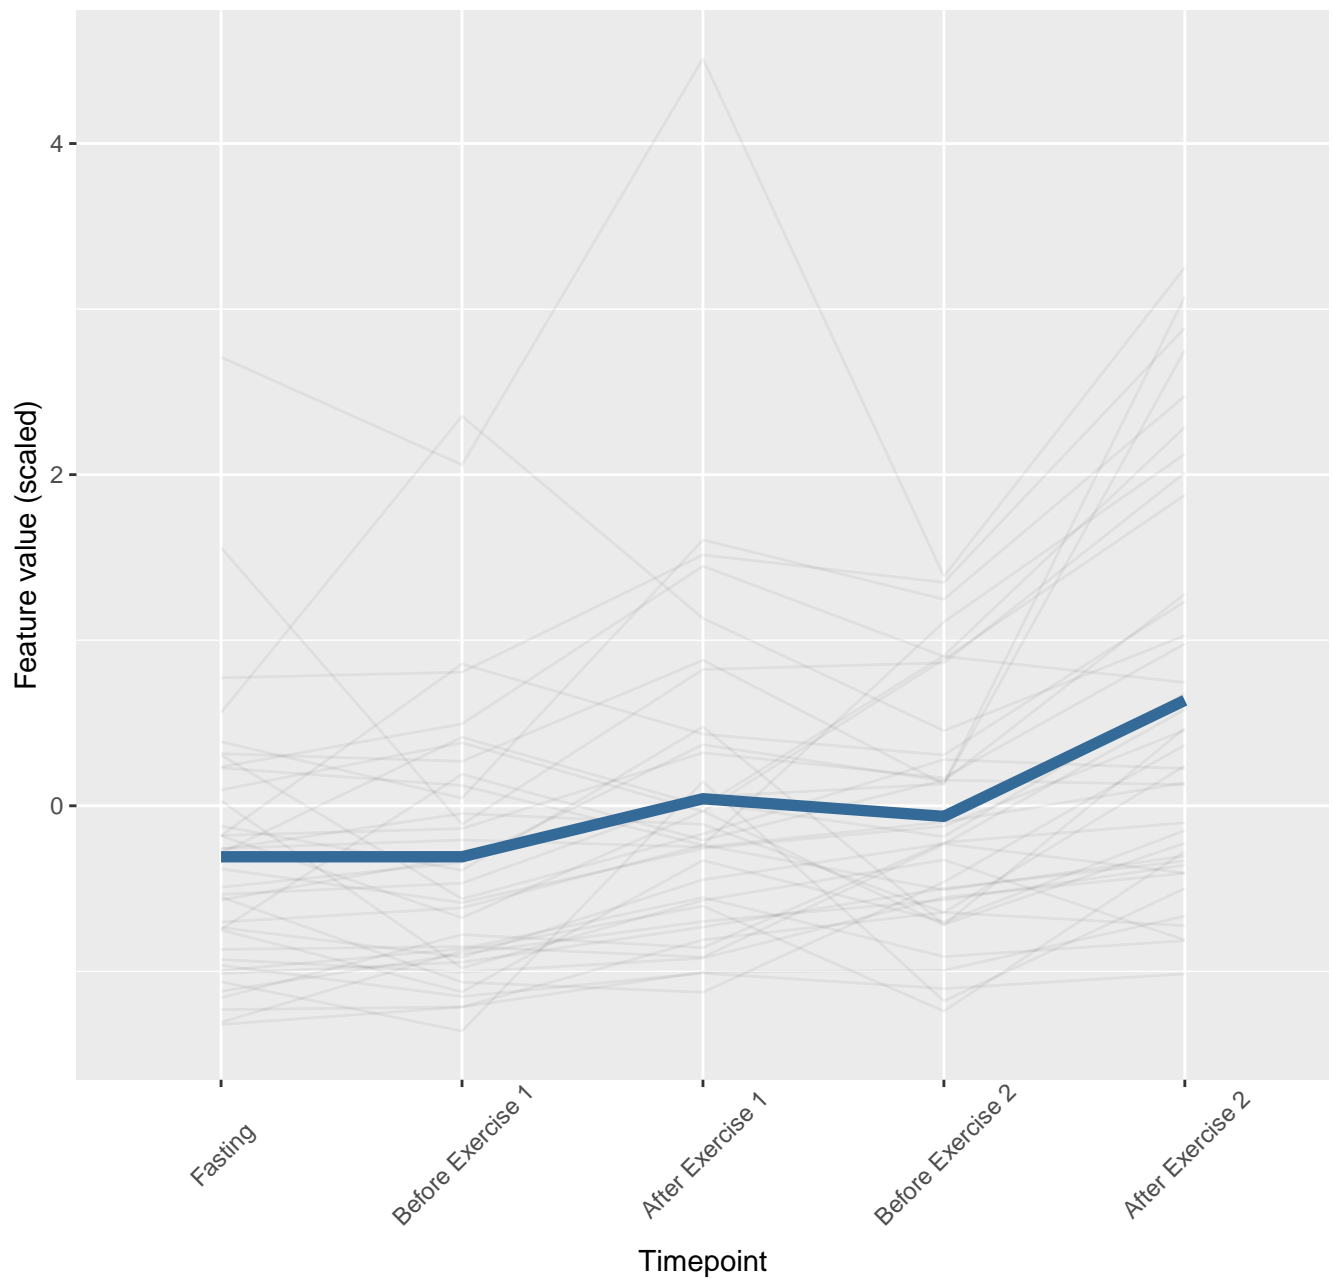

Line plot of TG(18:0/18:1/20:4)

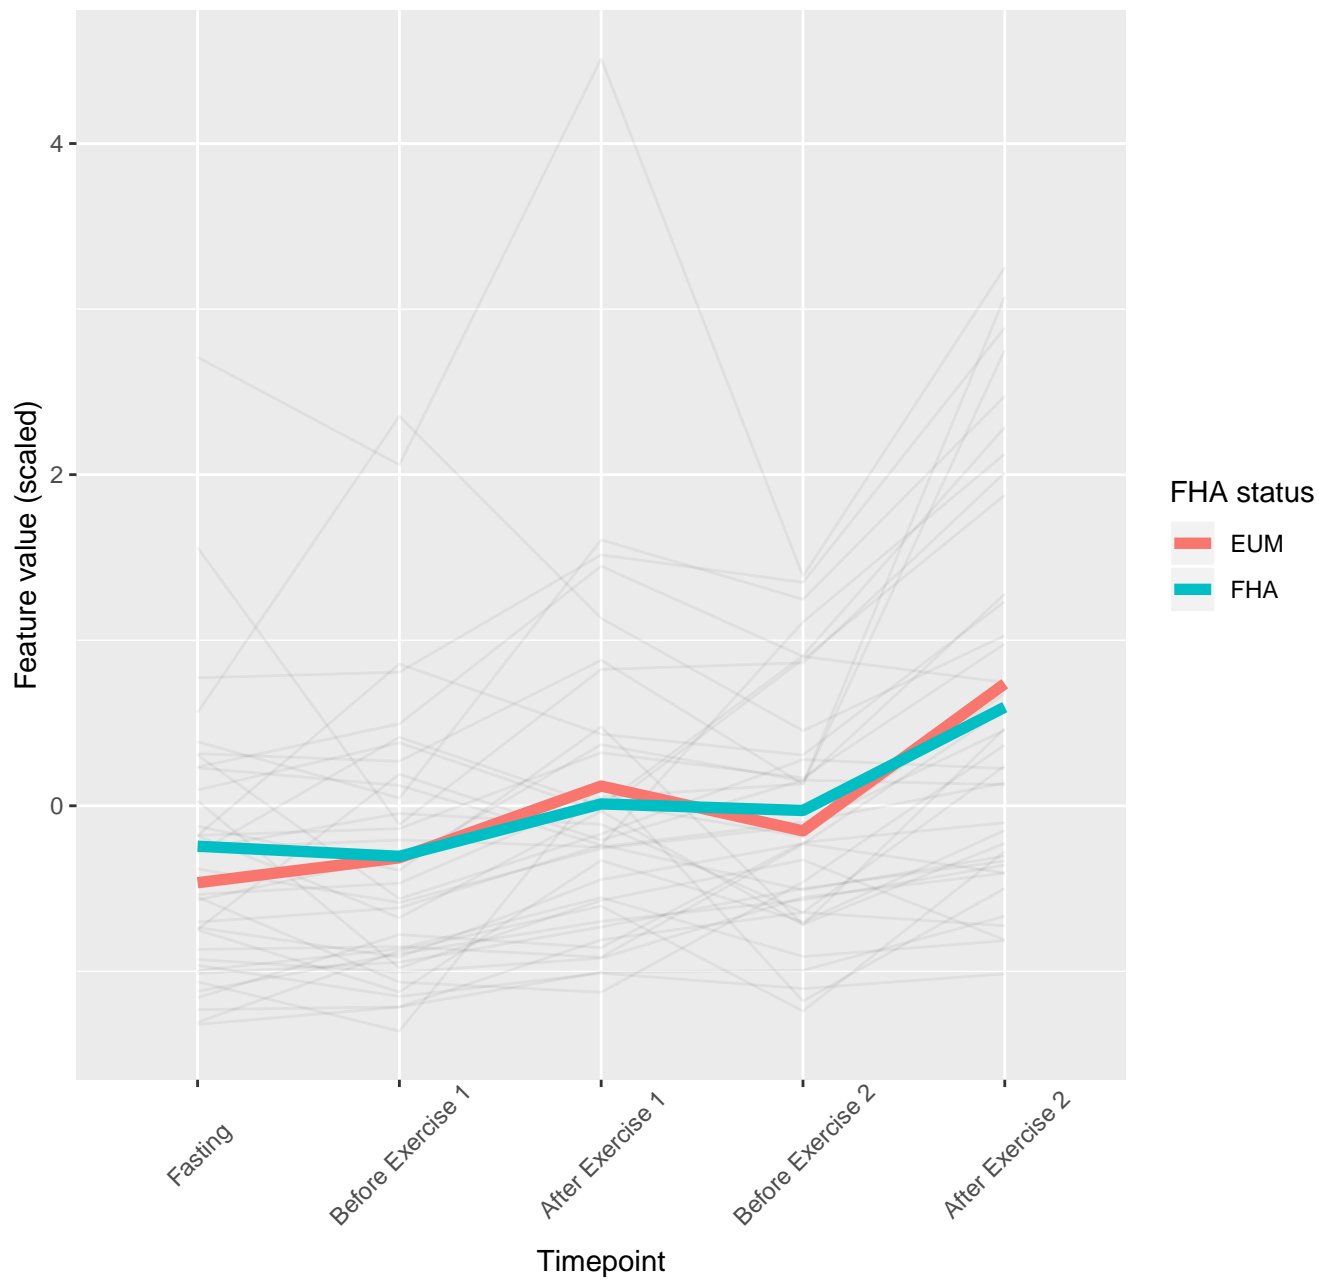

Line plot of TG(18:0/18:1/20:4)

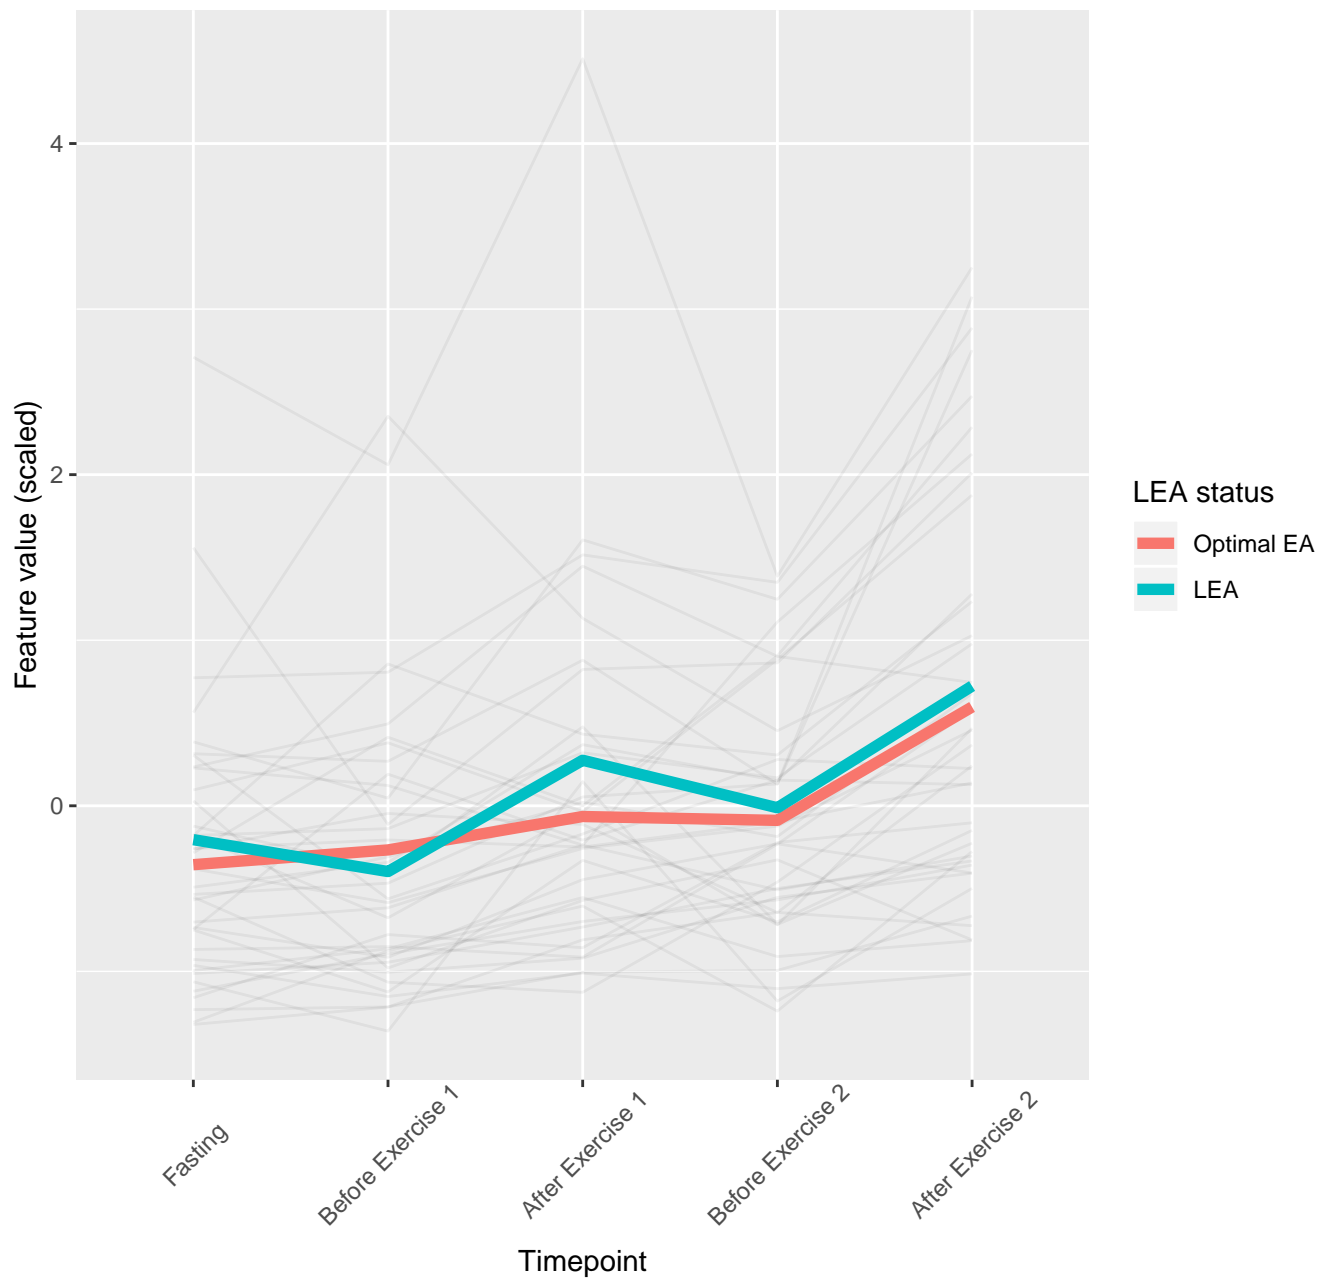

Line plot of TG(18:1/12:0/18:1) or TG(18:2/16:0/14:0)

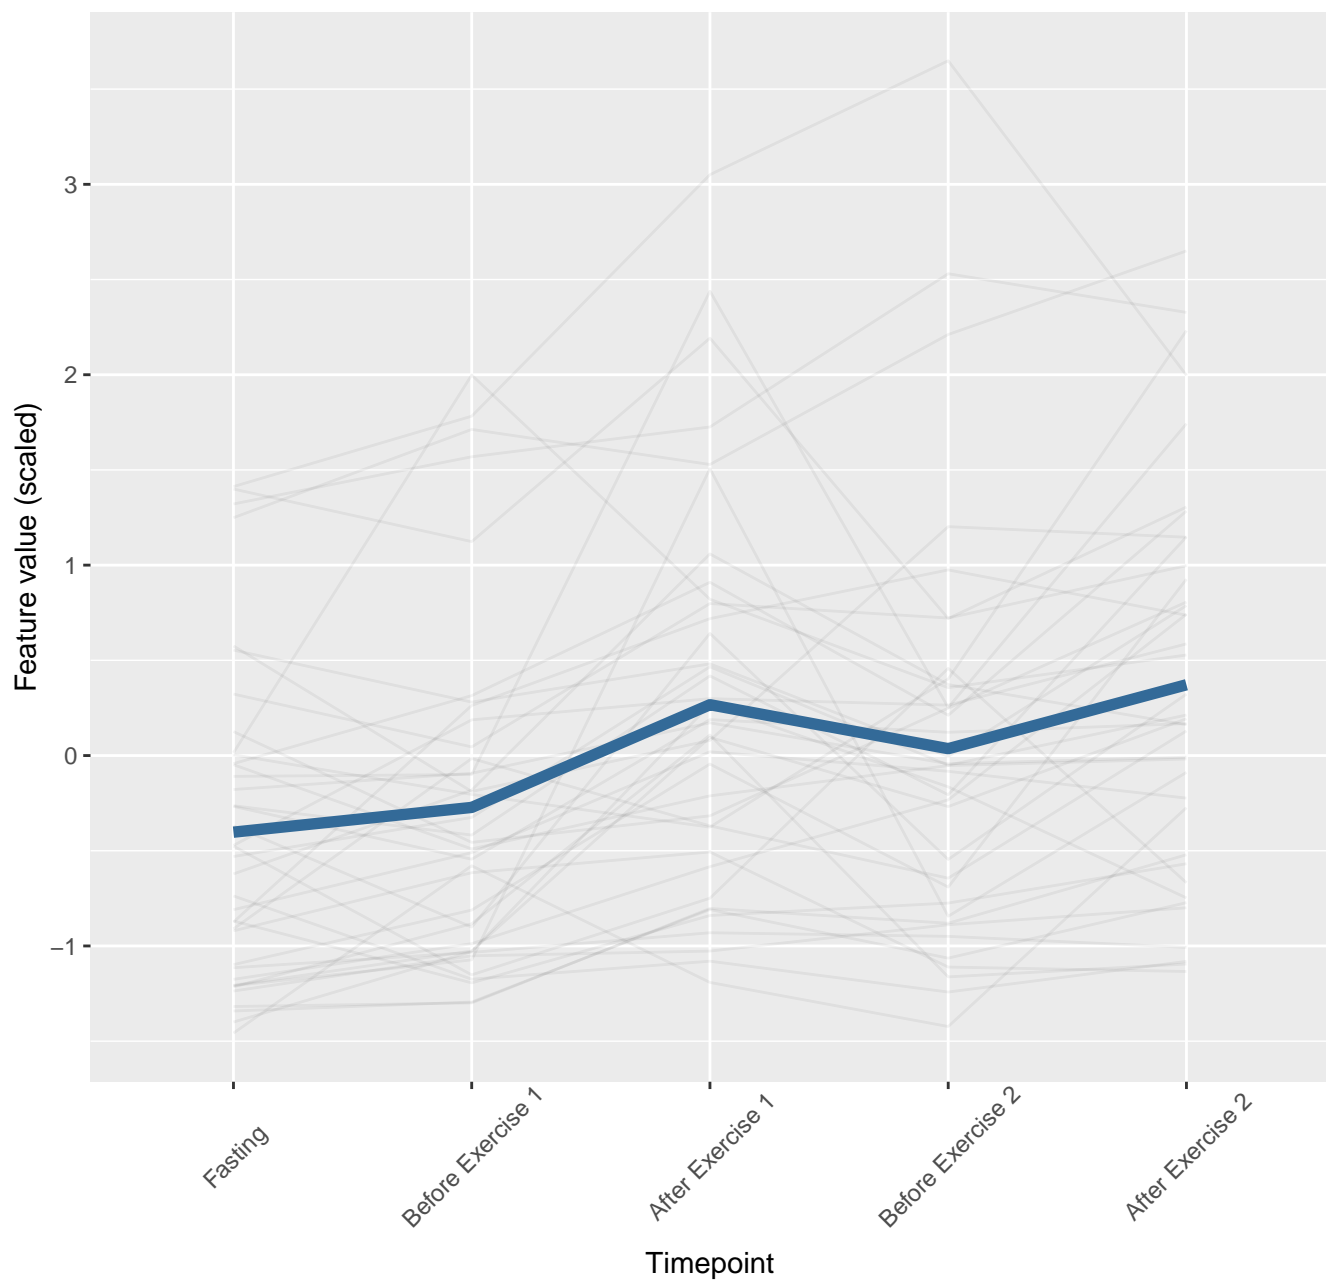

Line plot of TG(18:1/12:0/18:1) or TG(18:2/16:0/14:0)

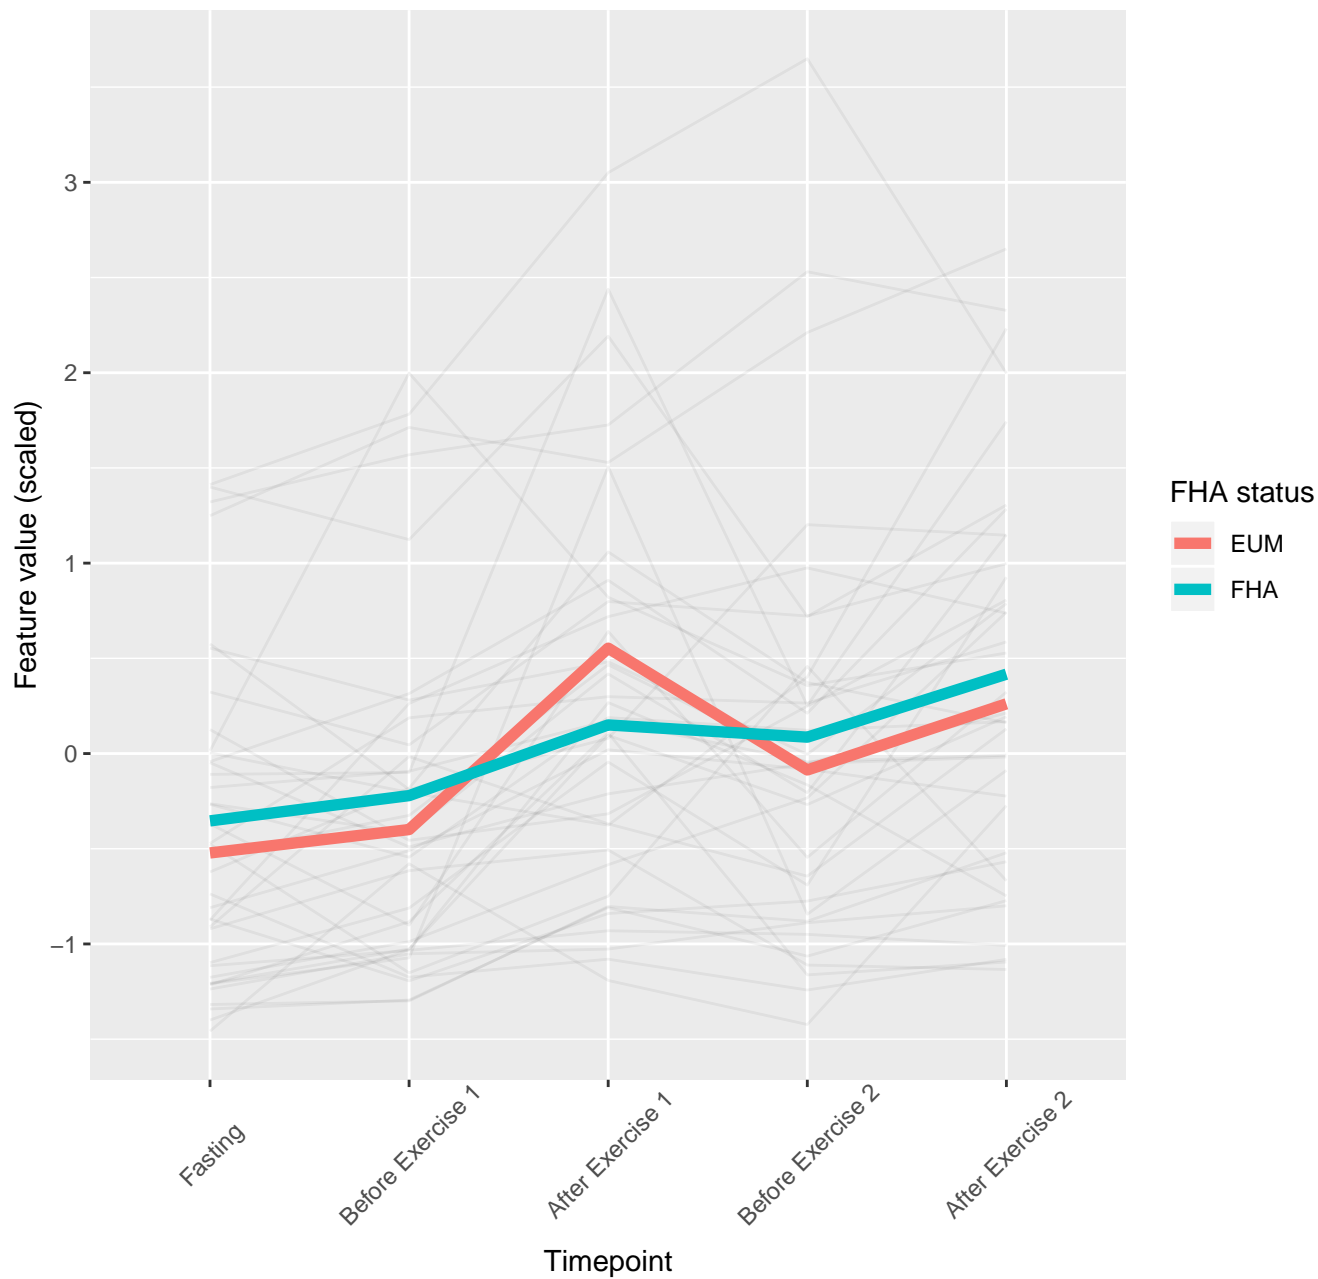

Line plot of TG(18:1/12:0/18:1) or TG(18:2/16:0/14:0)

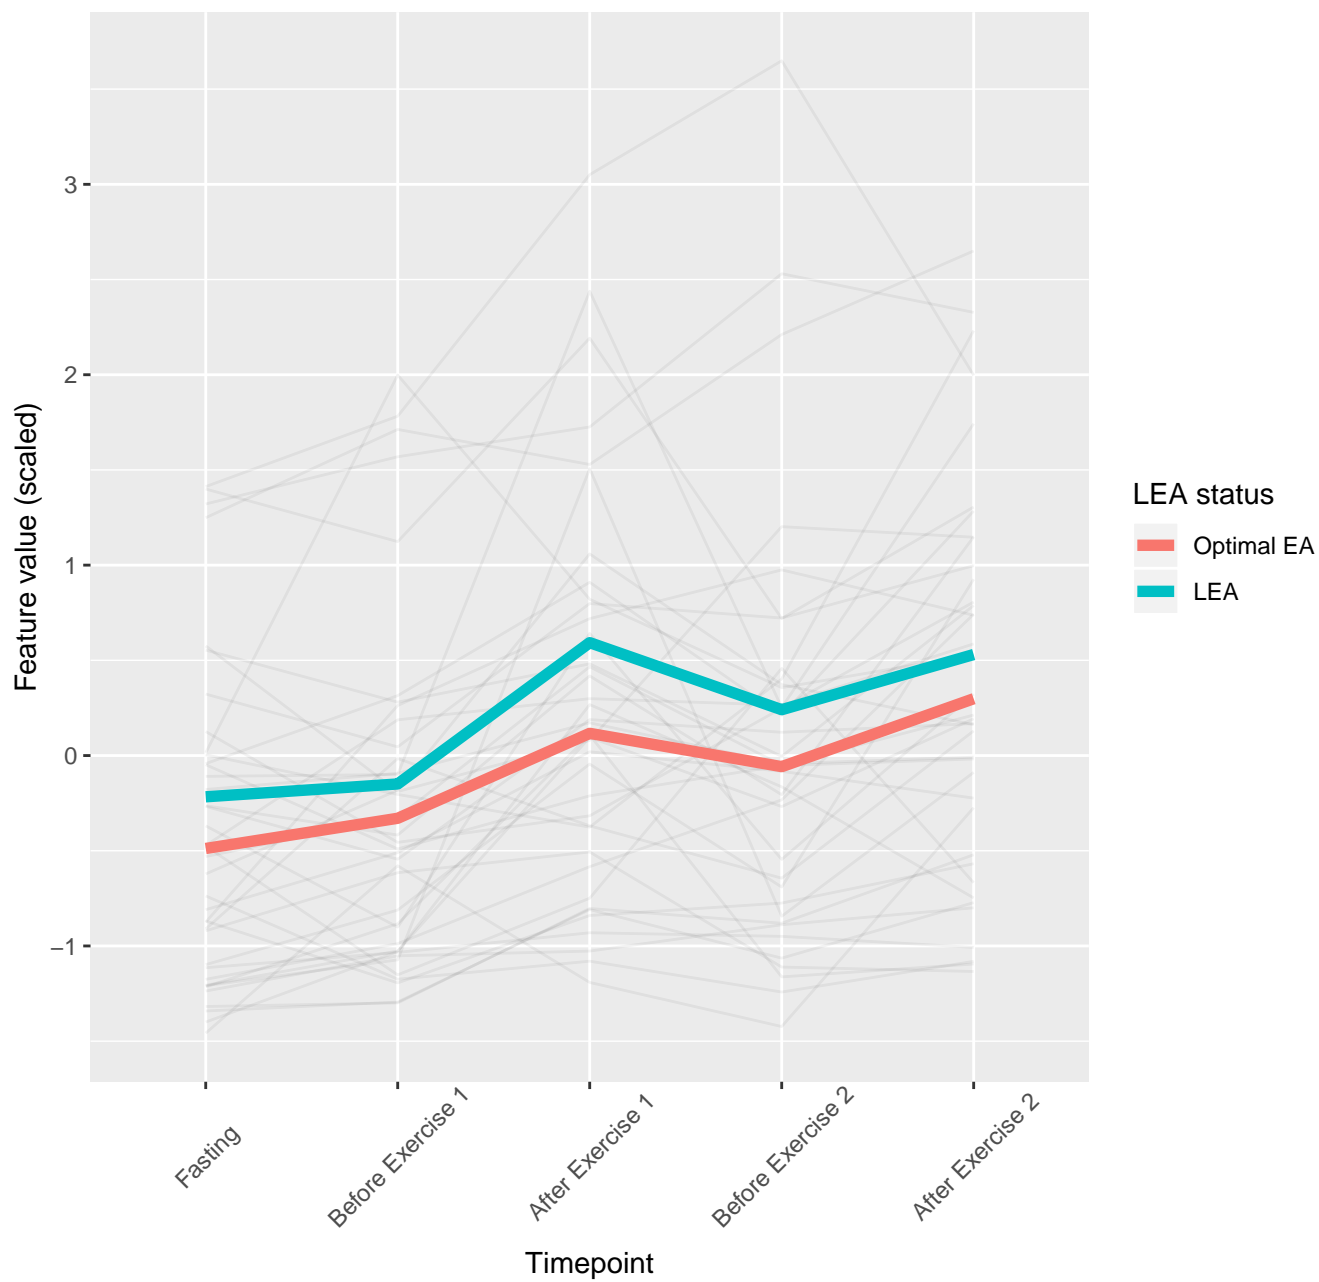

Line plot of TG(18:1/18:1/16:0)

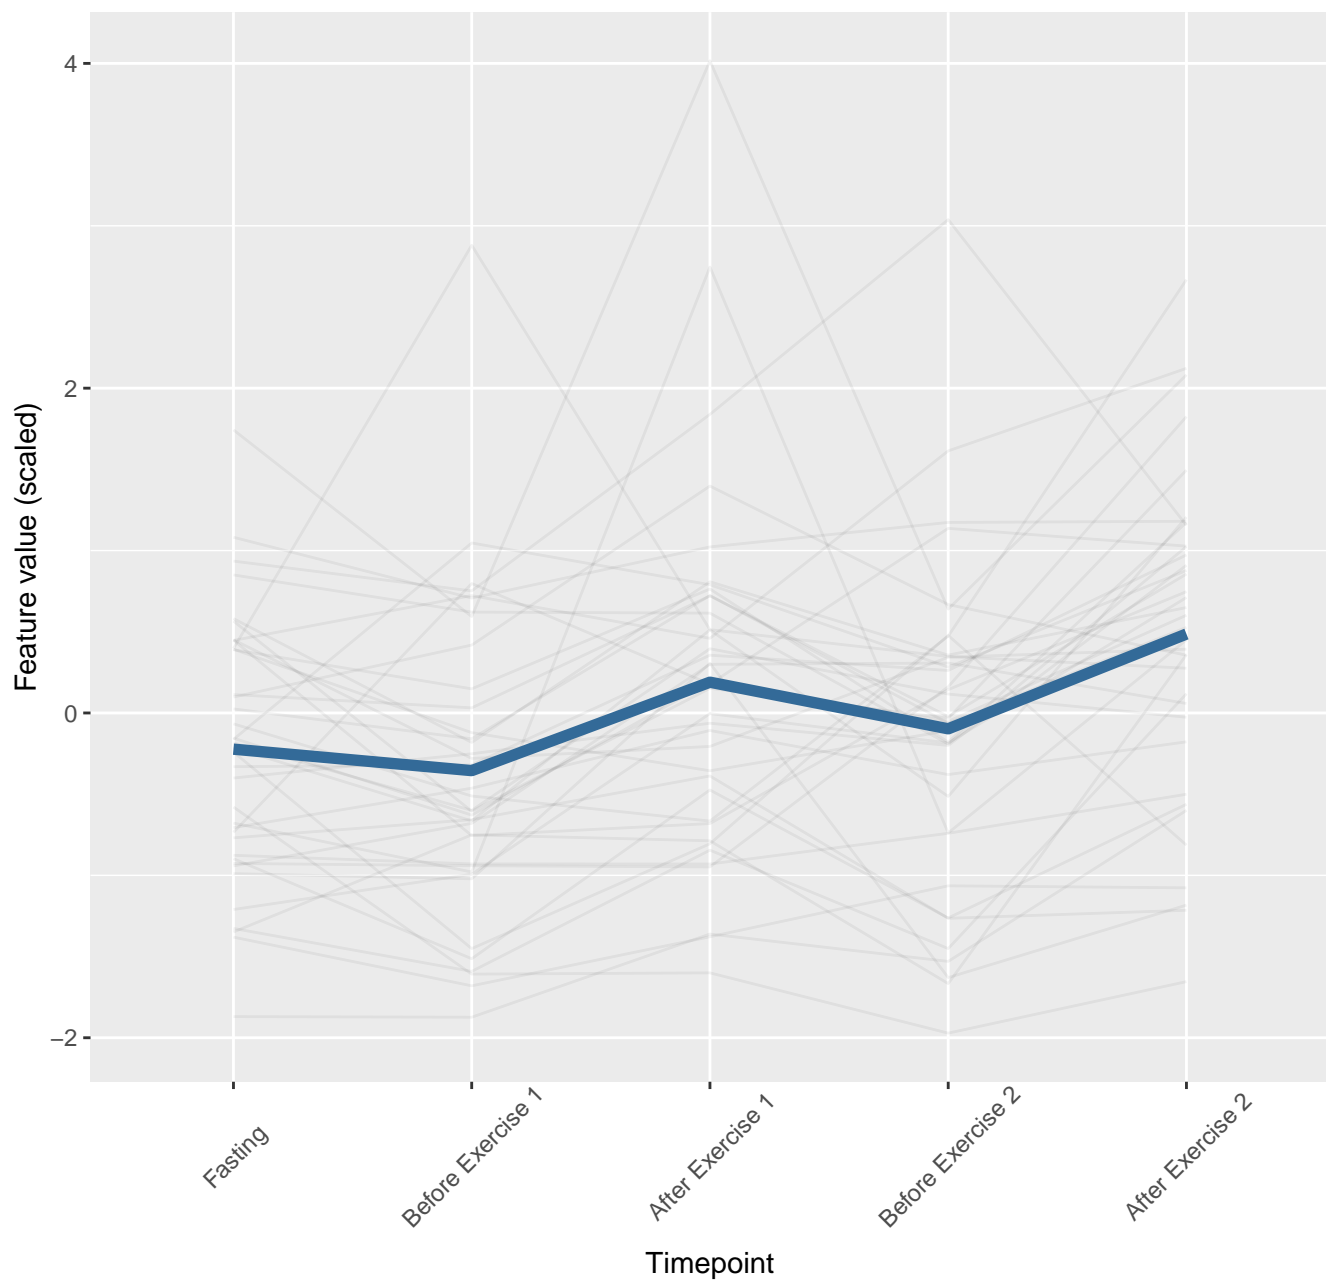



Line plot of TG(18:1/18:1/16:0)

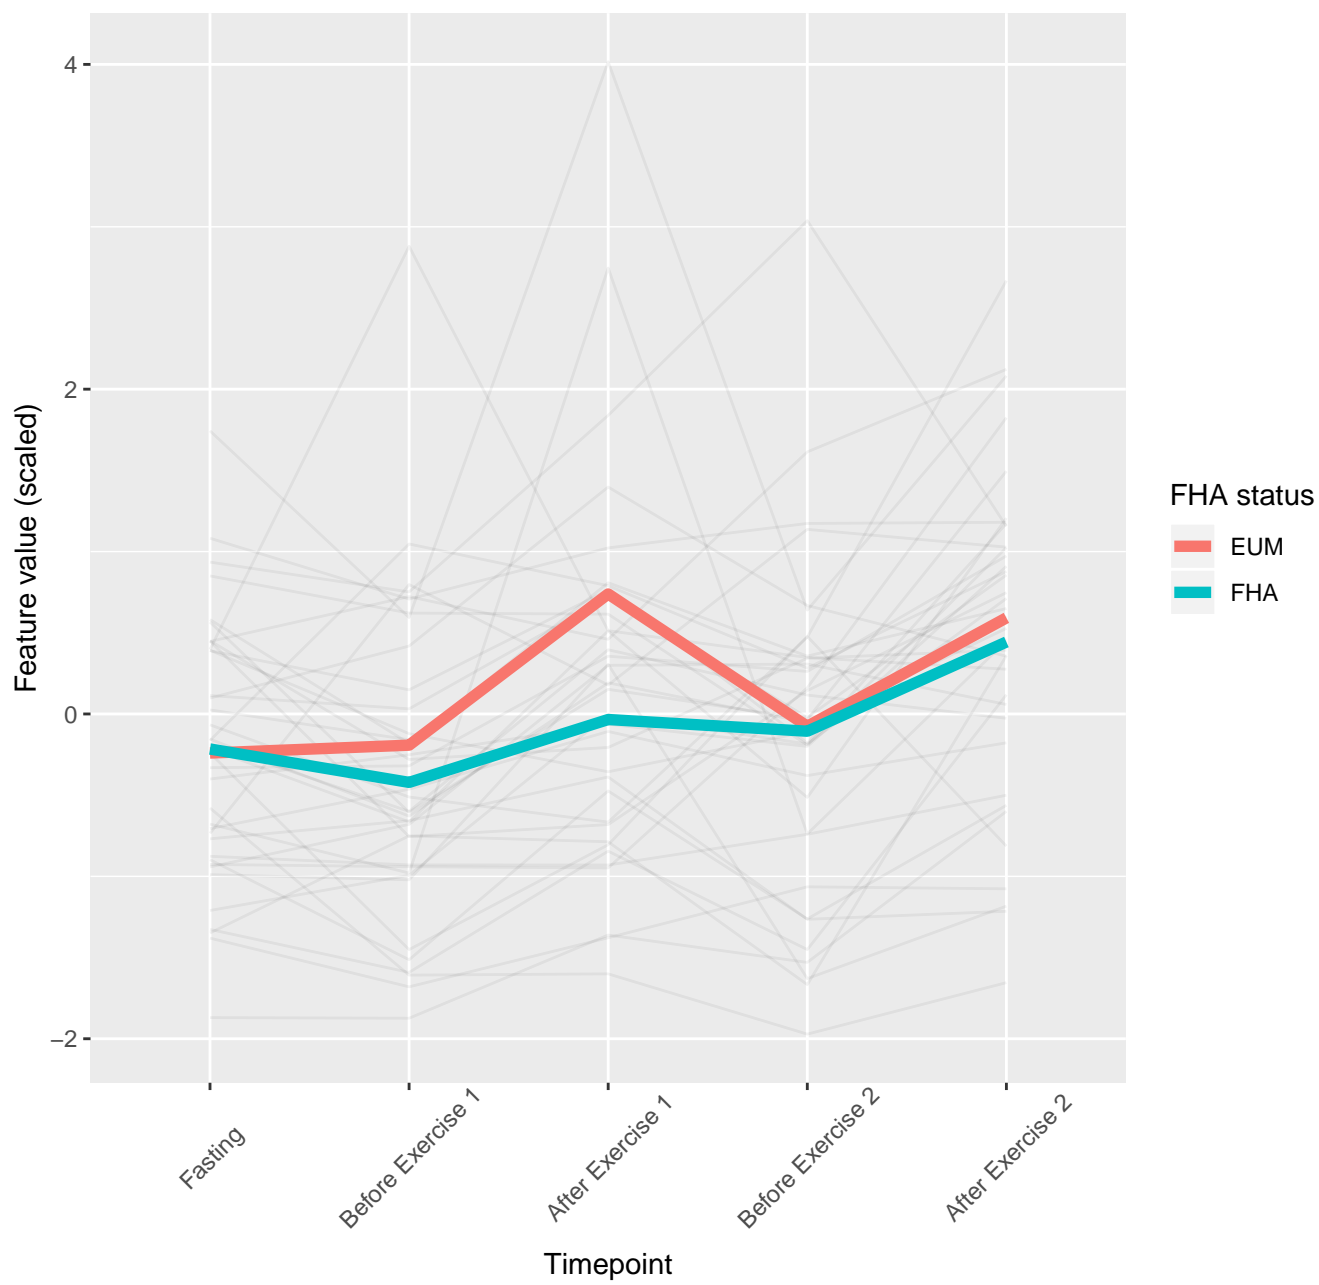

Line plot of TG(18:1/18:1/16:0)

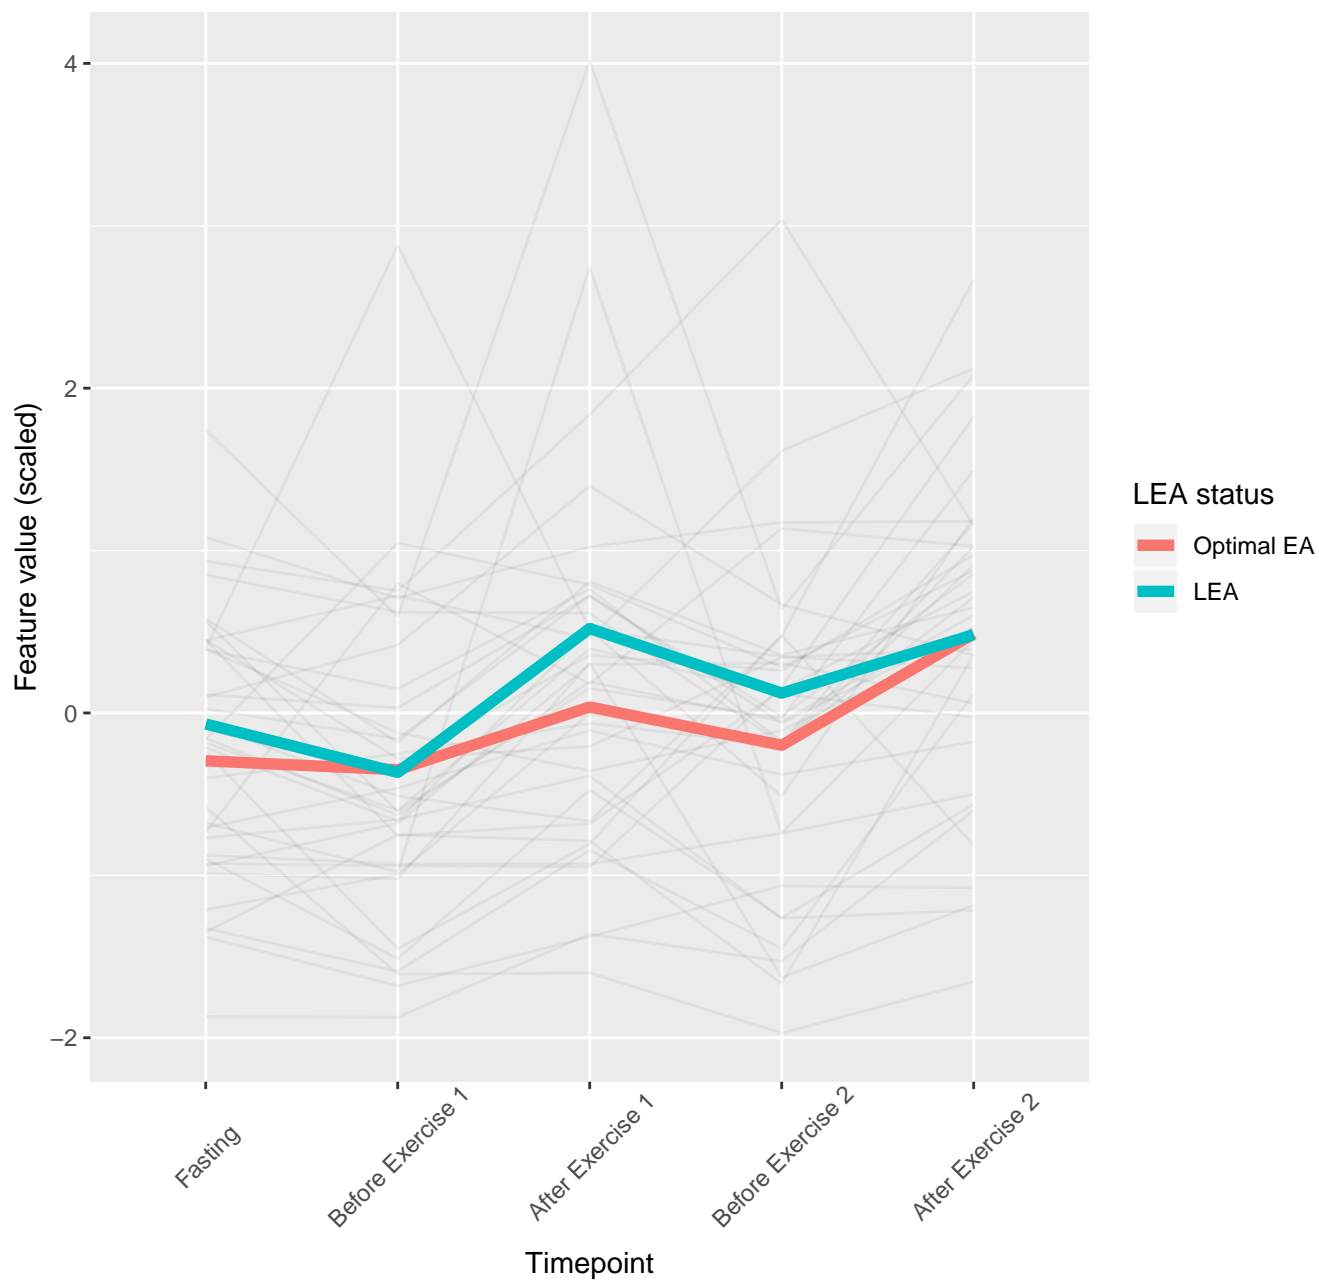

Line plot of TG(18:1/18:1/18:1)

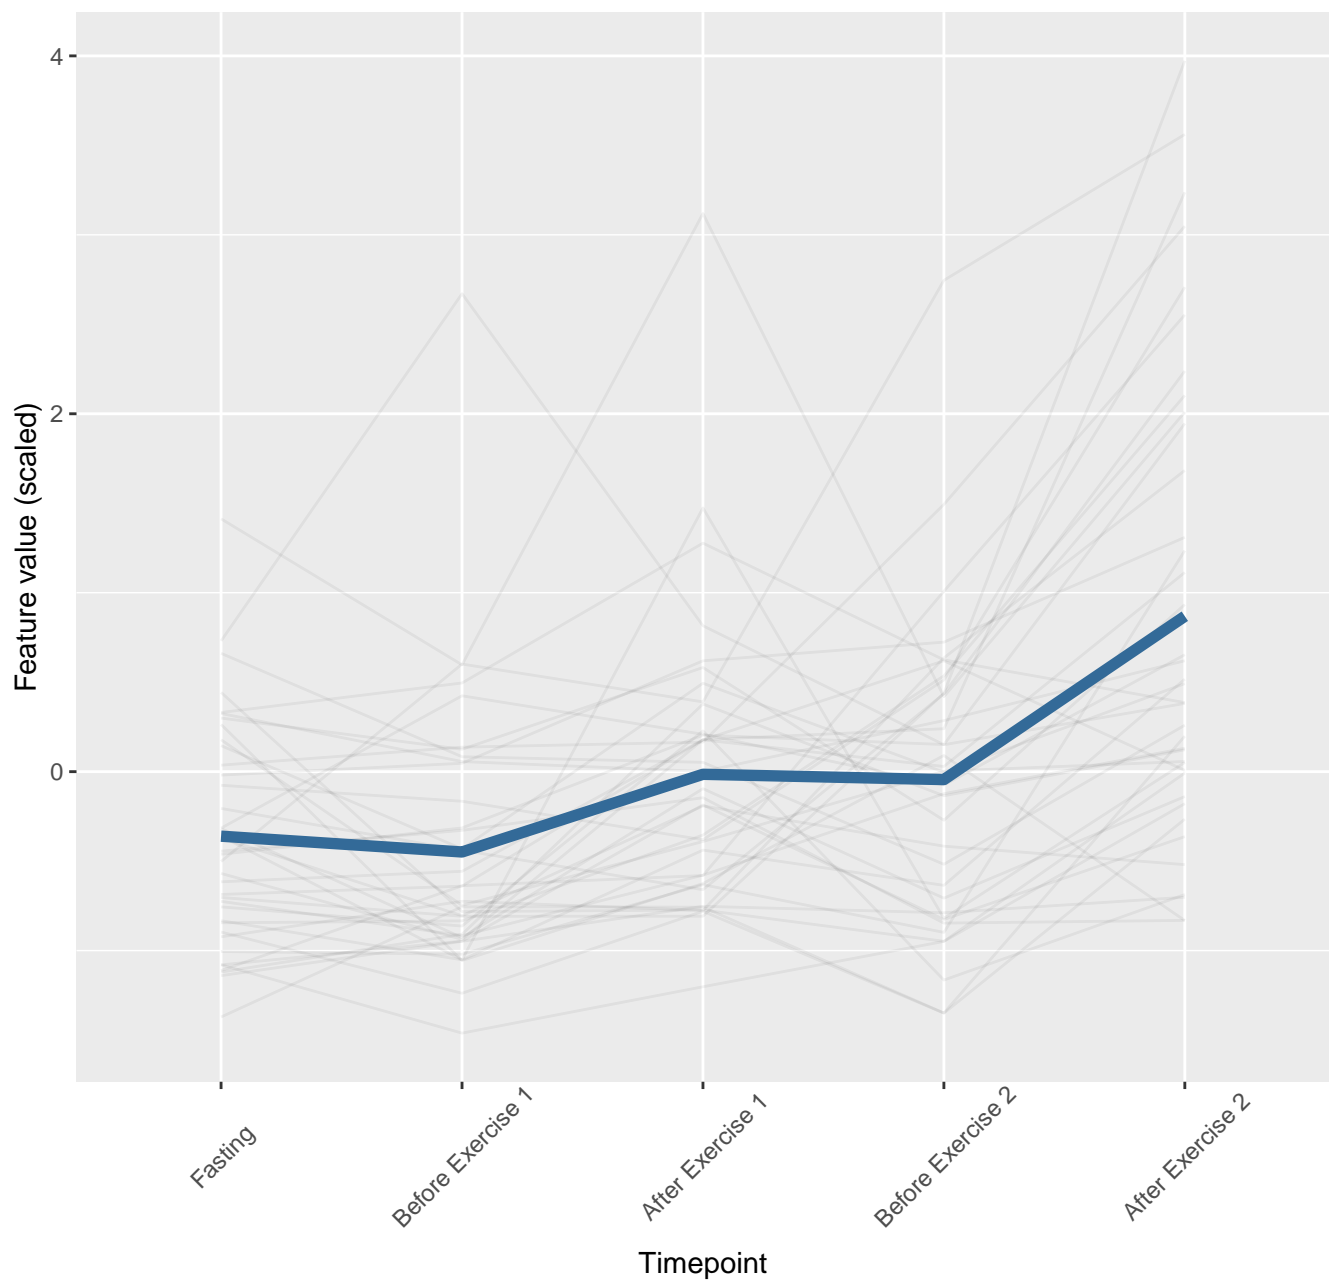

Line plot of TG(18:1/18:1/18:1)

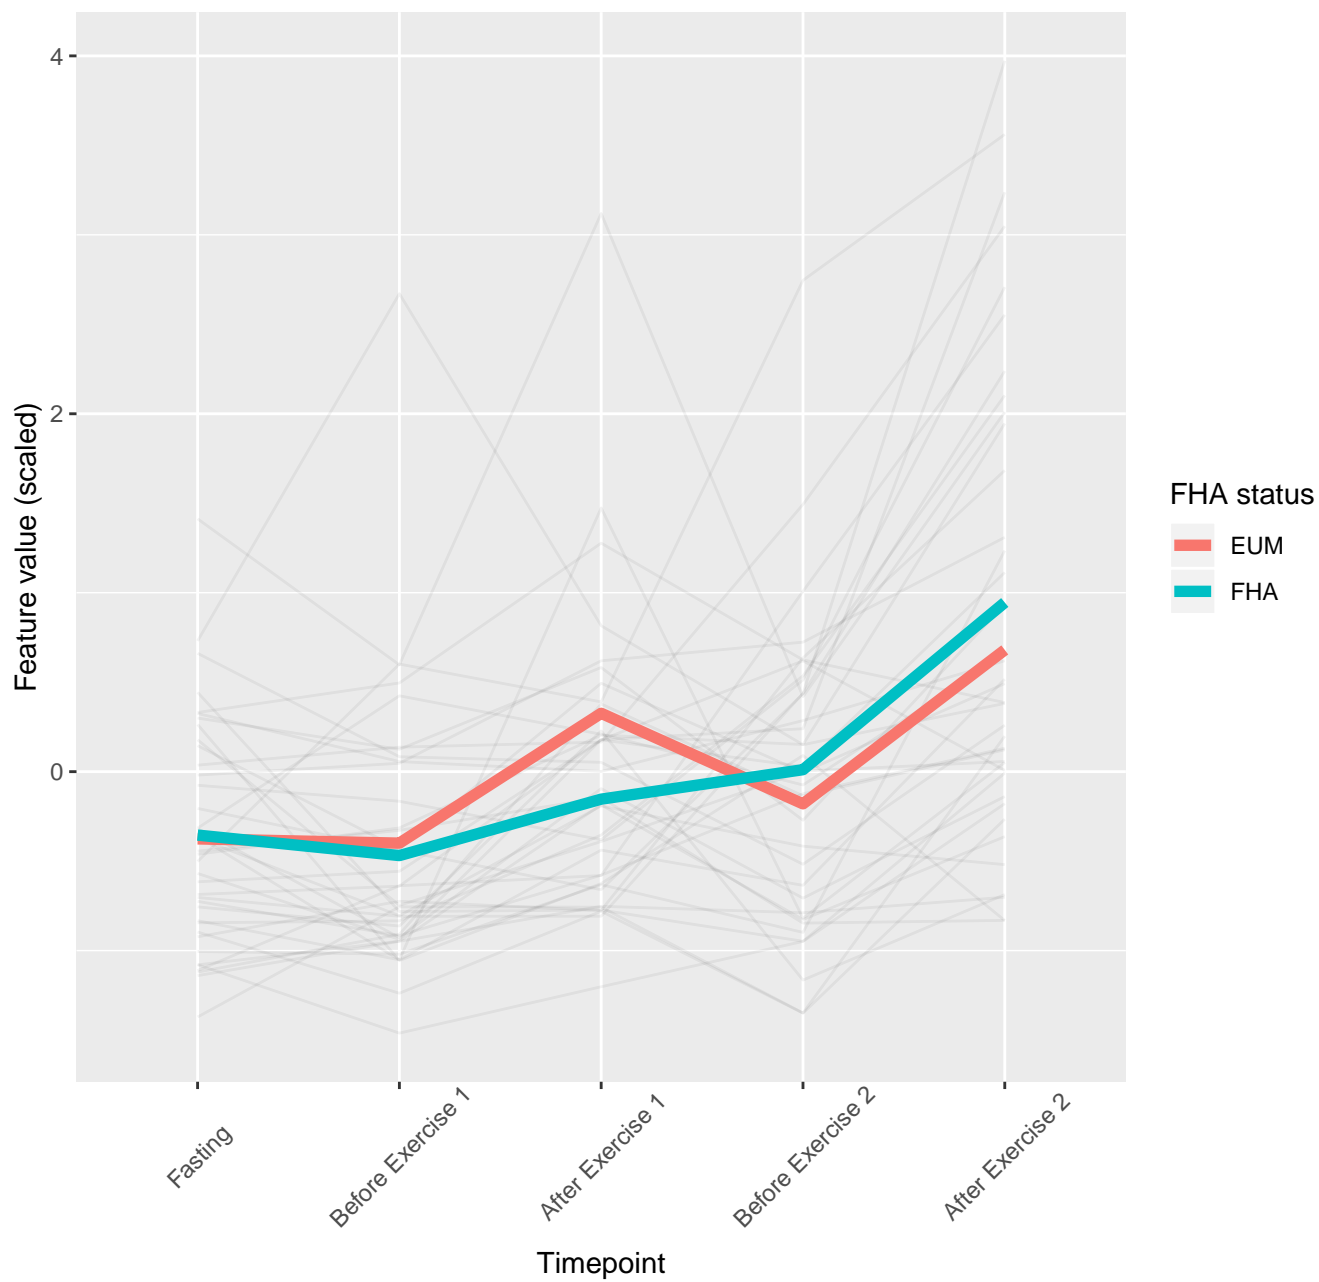

Line plot of TG(18:1/18:1/18:1)

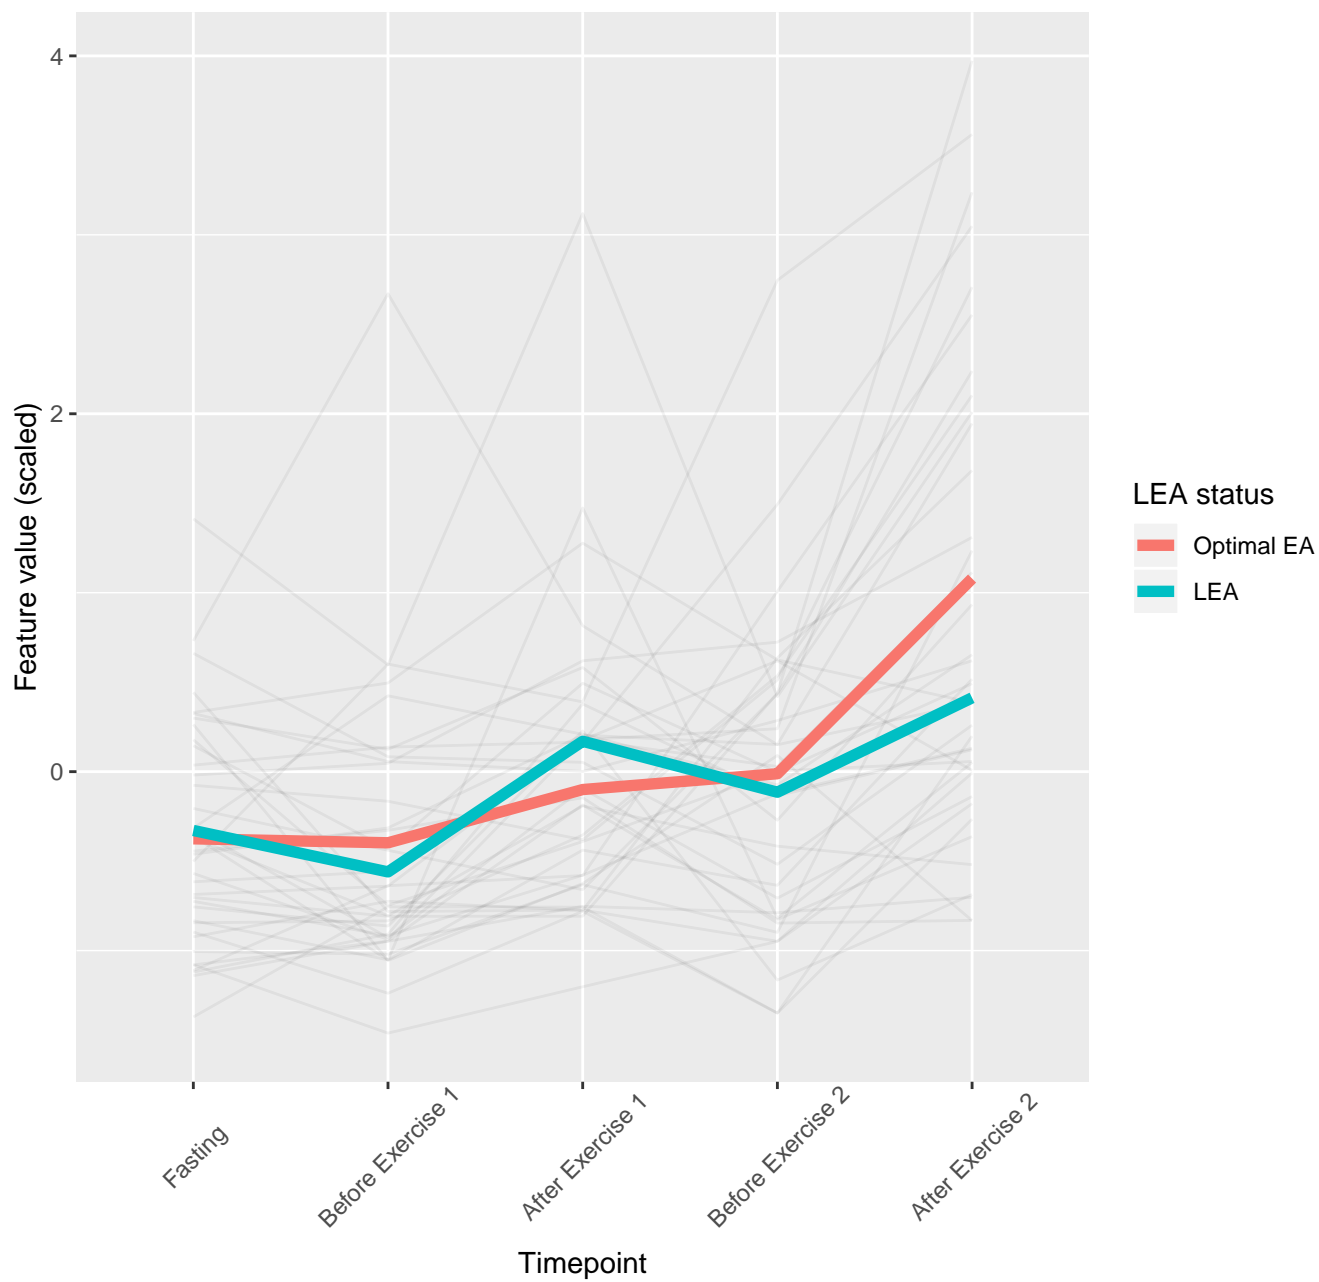

Line plot of TG(18:1/18:1/22:6)

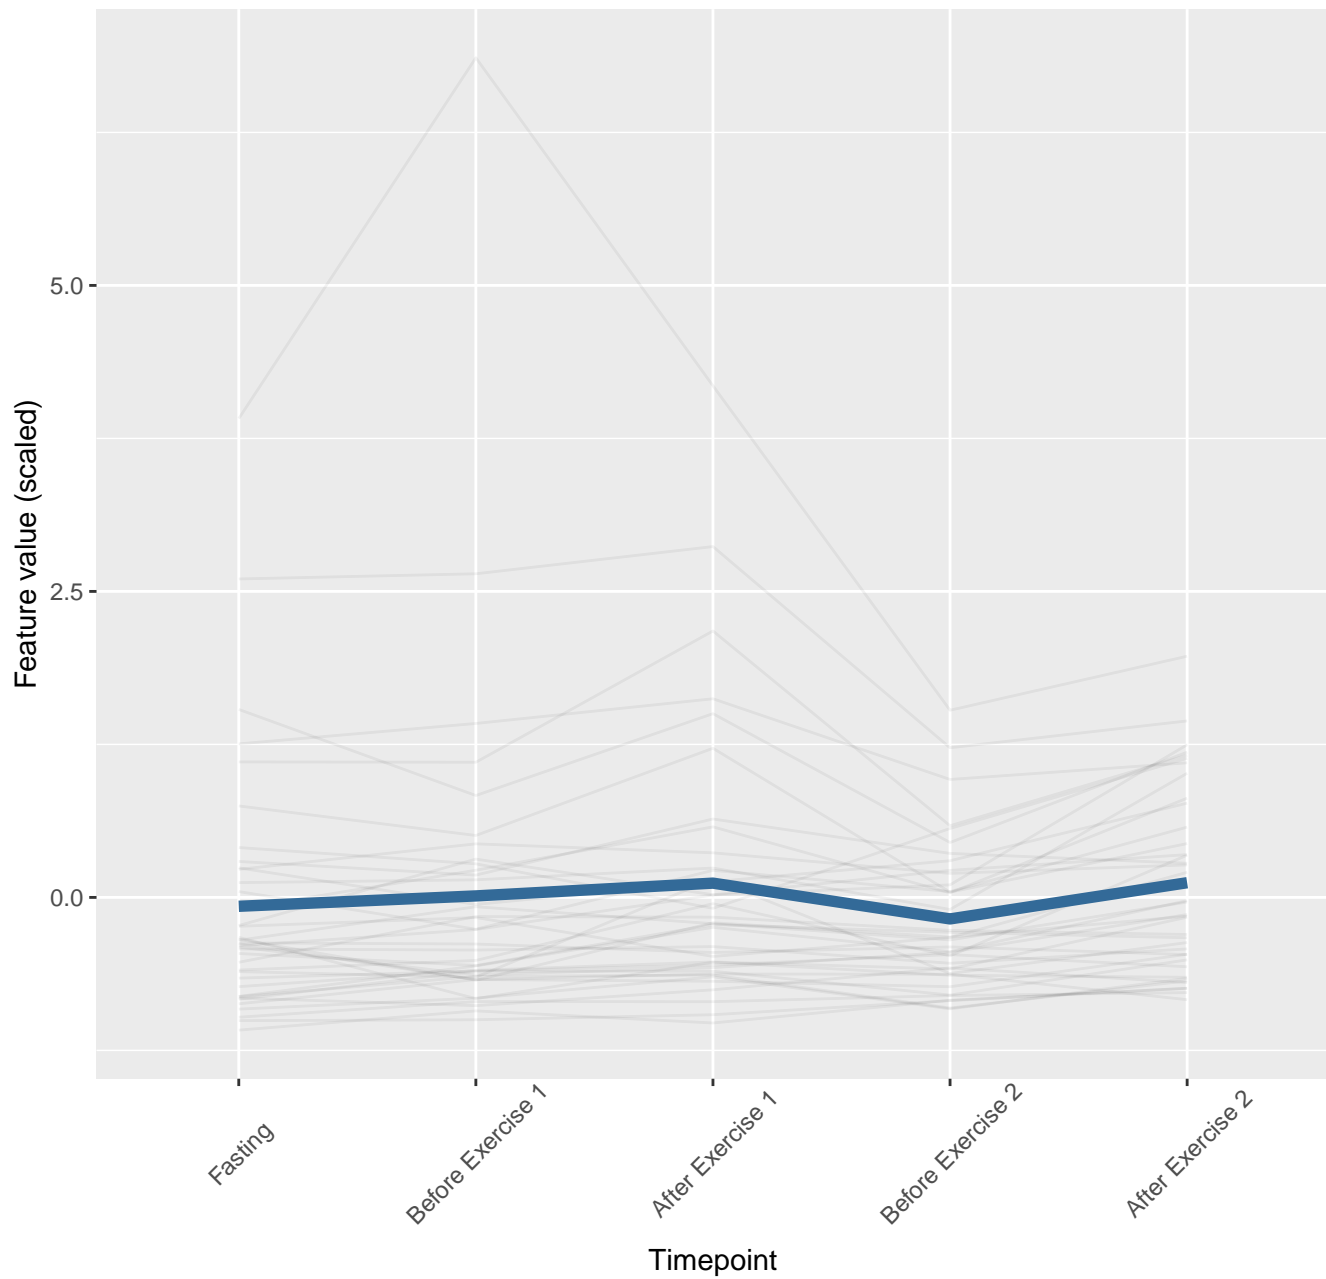

Line plot of TG(18:1/18:1/22:6)

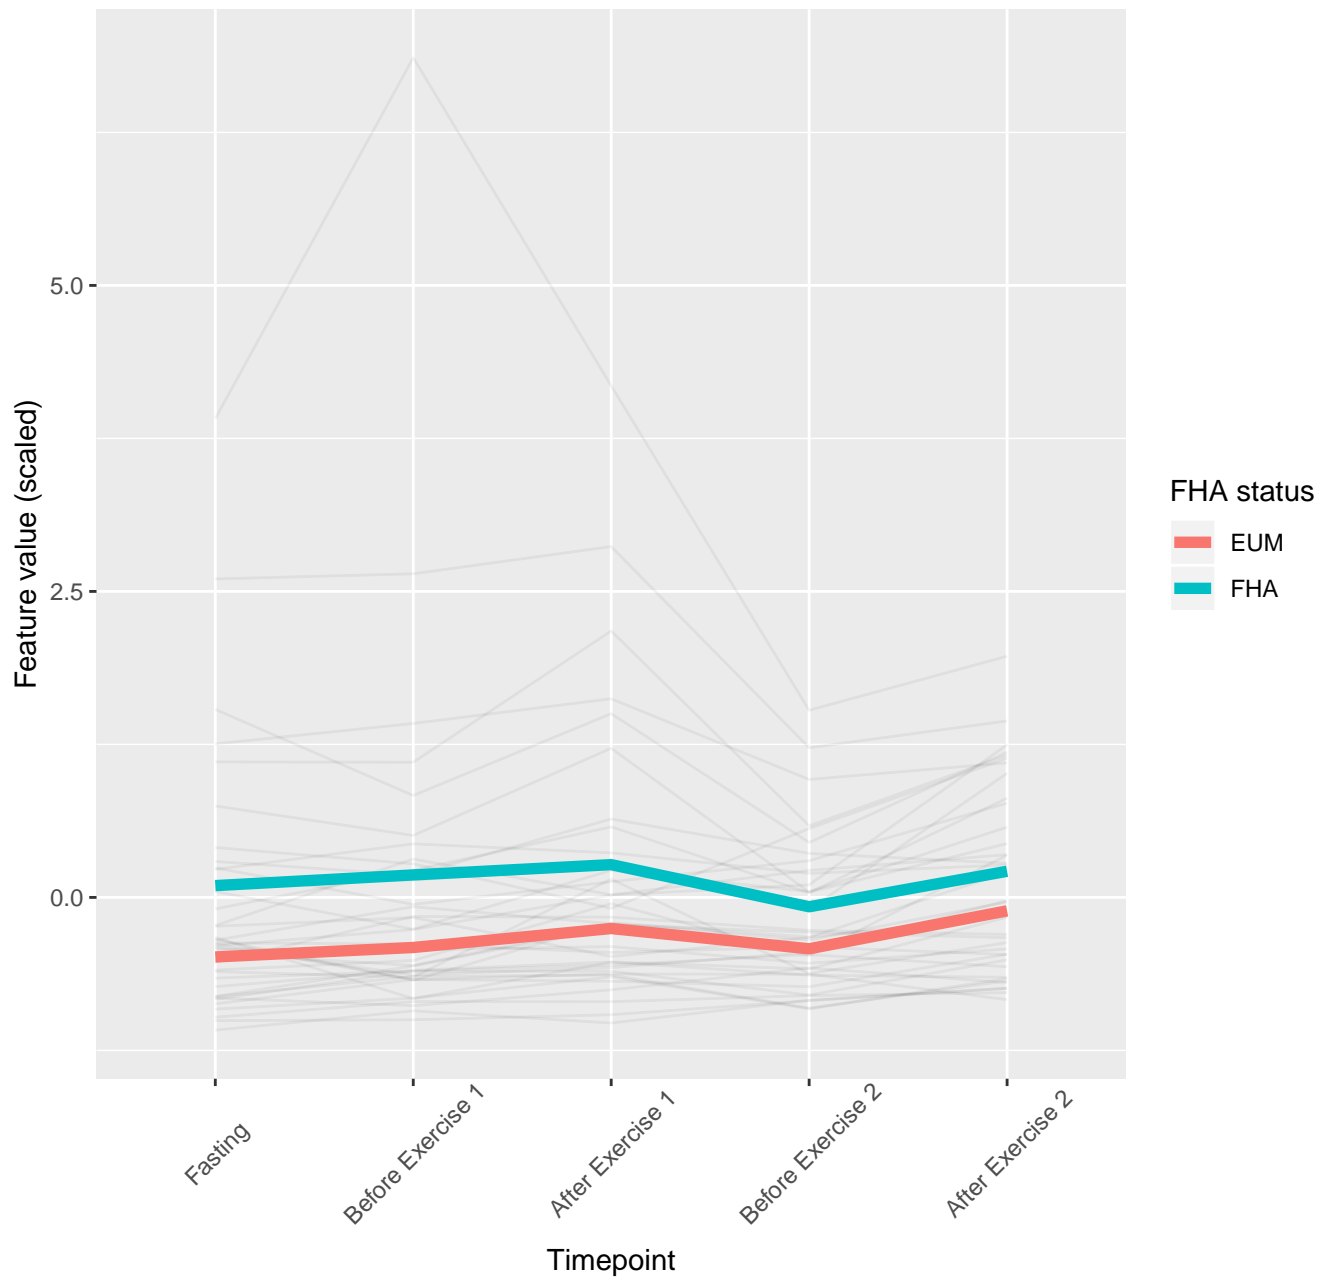

Line plot of TG(18:1/18:1/22:6)

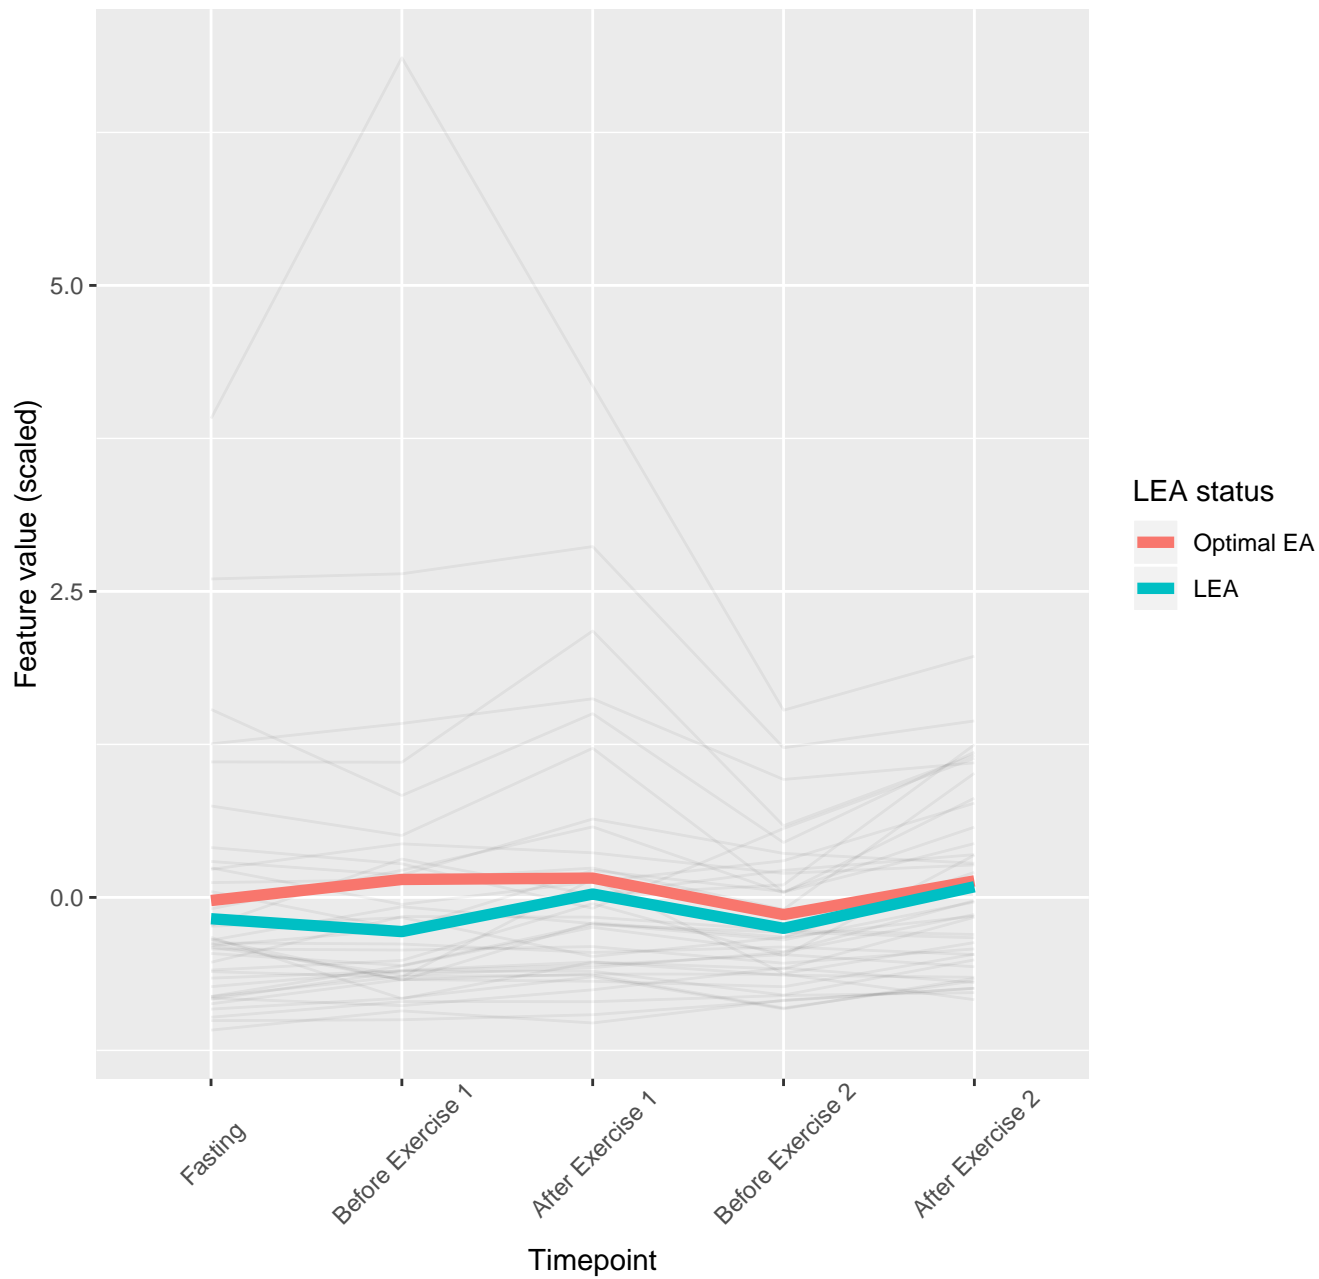



Line plot of TG(18:1/18:2/18:2)

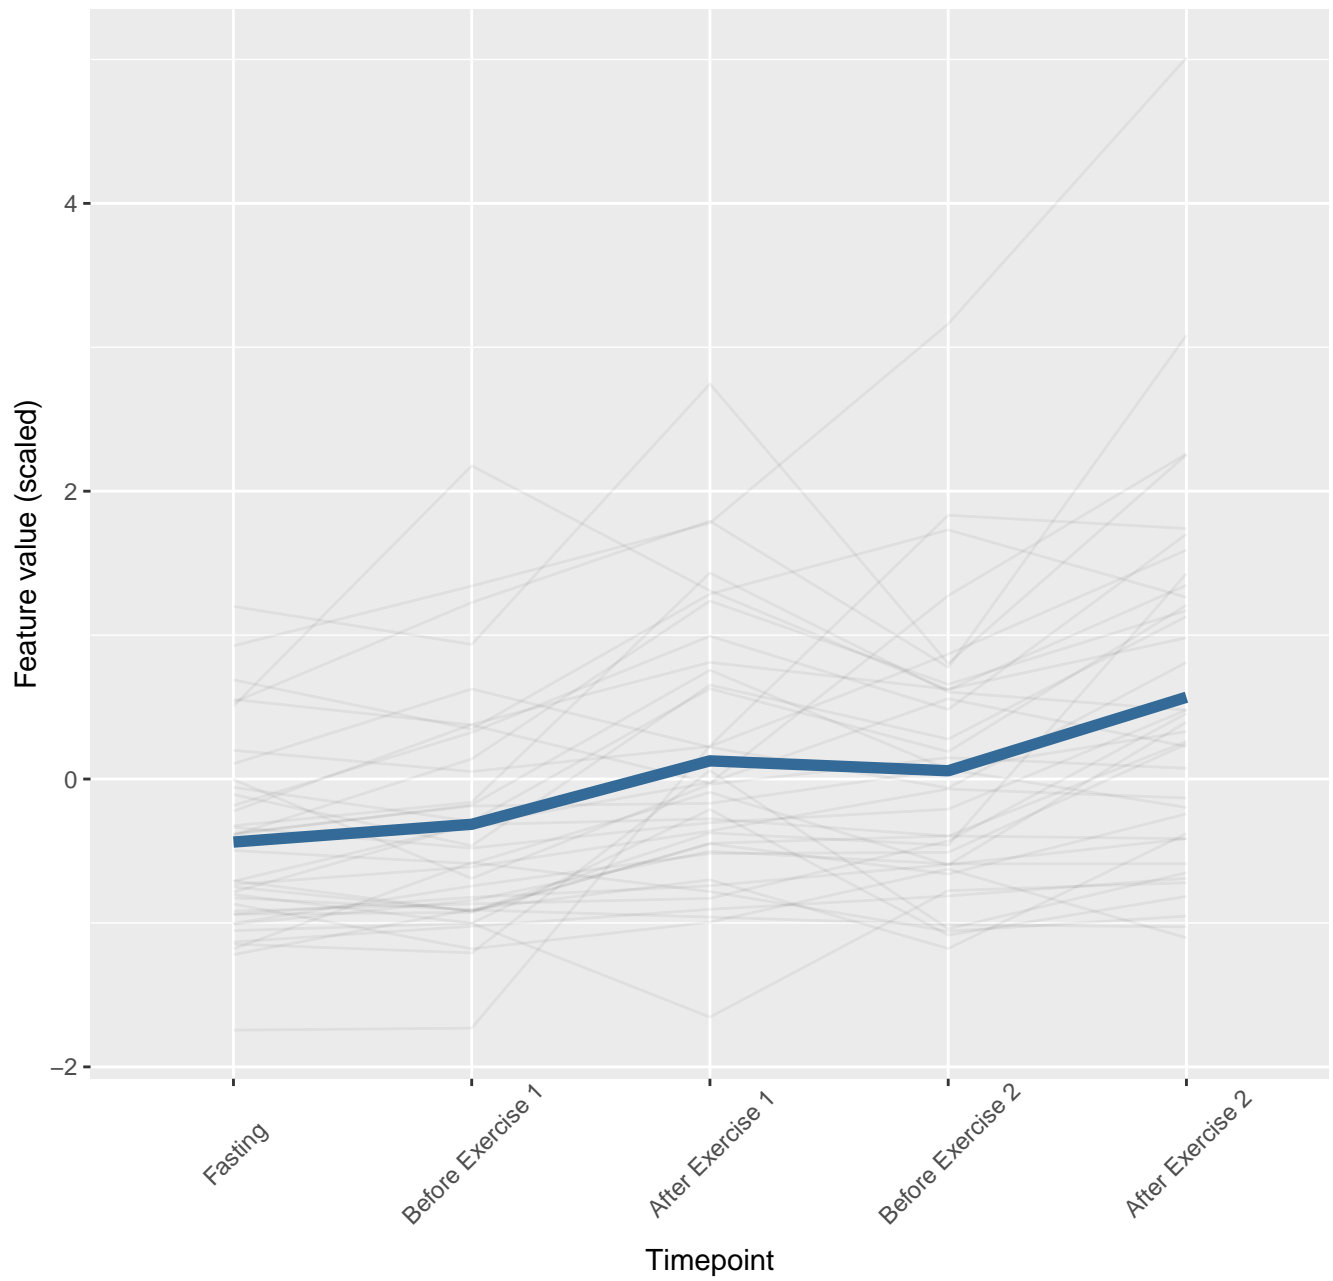

Line plot of TG(18:1/18:2/18:2)

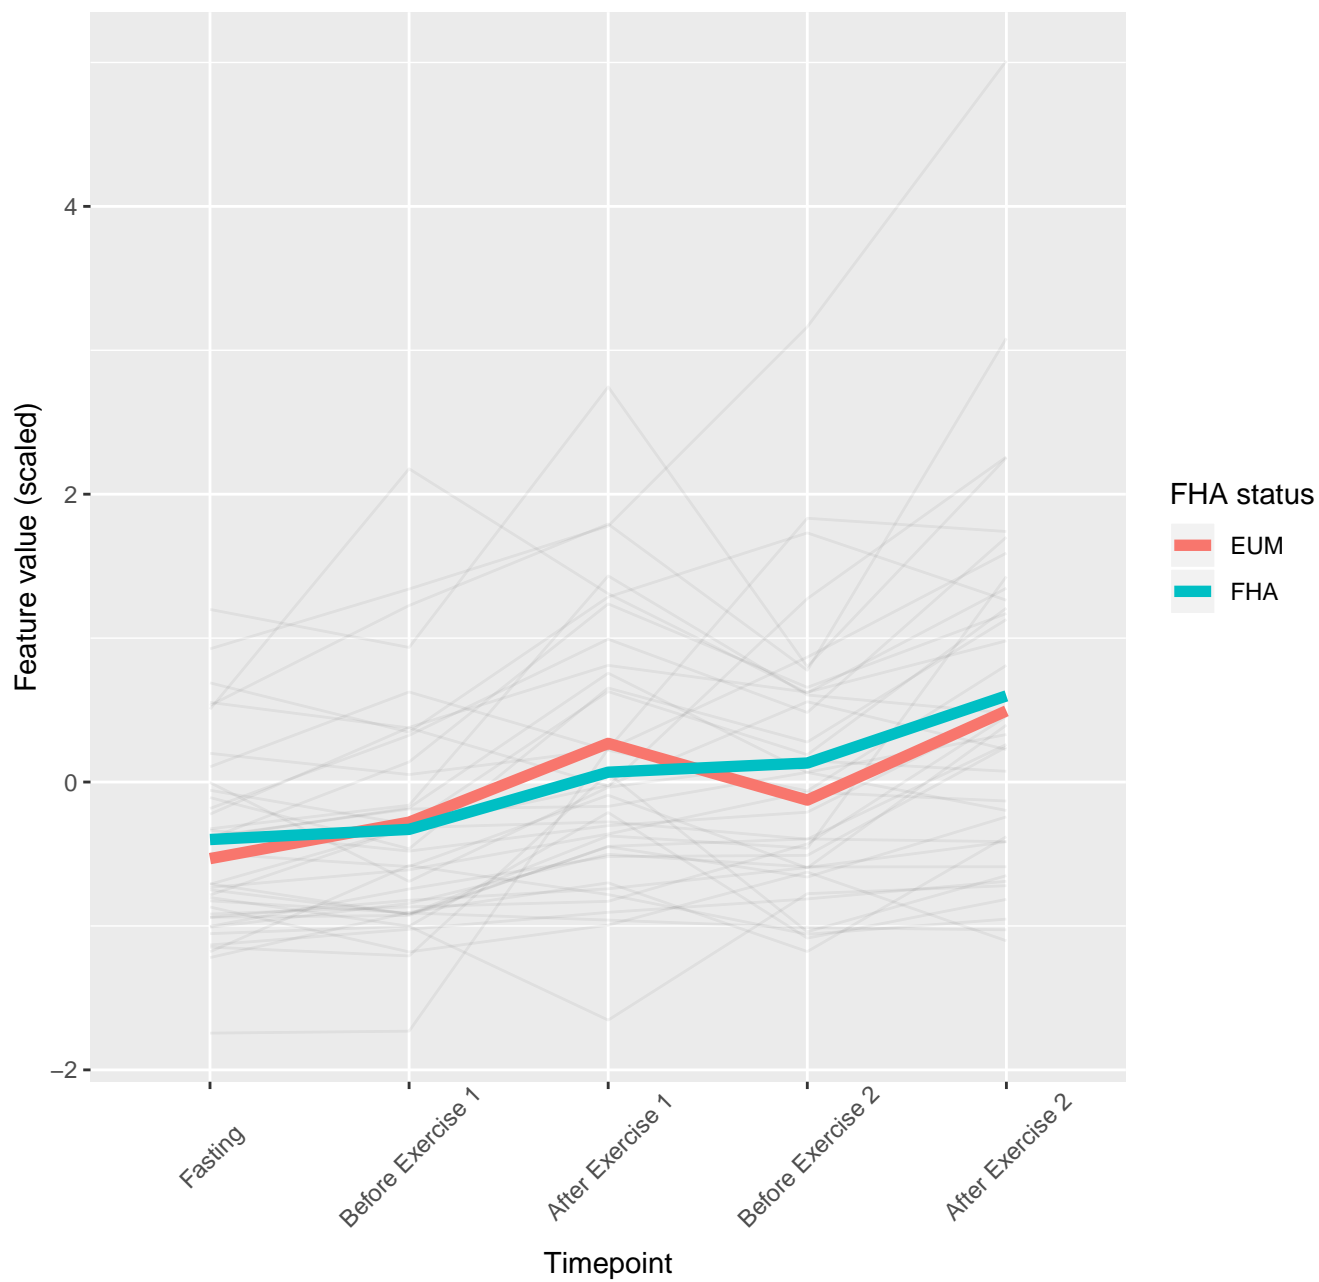

Line plot of TG(18:1/18:2/18:2)

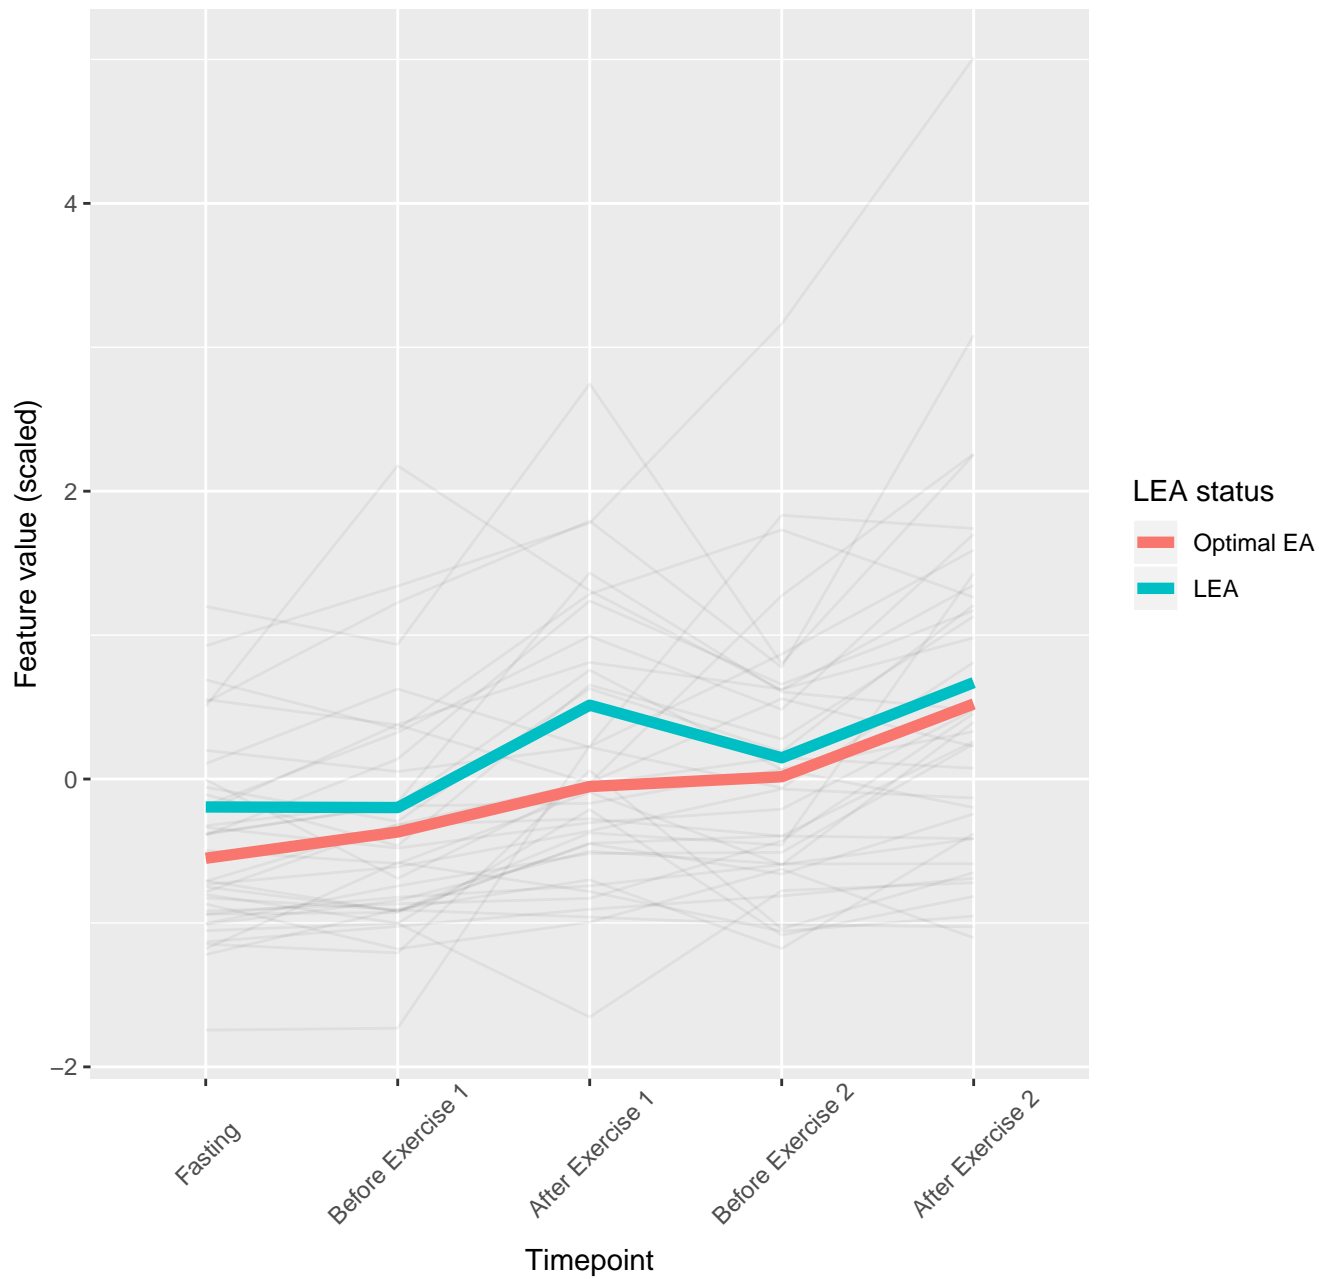

Line plot of TG(18:2/18:1/16:0)

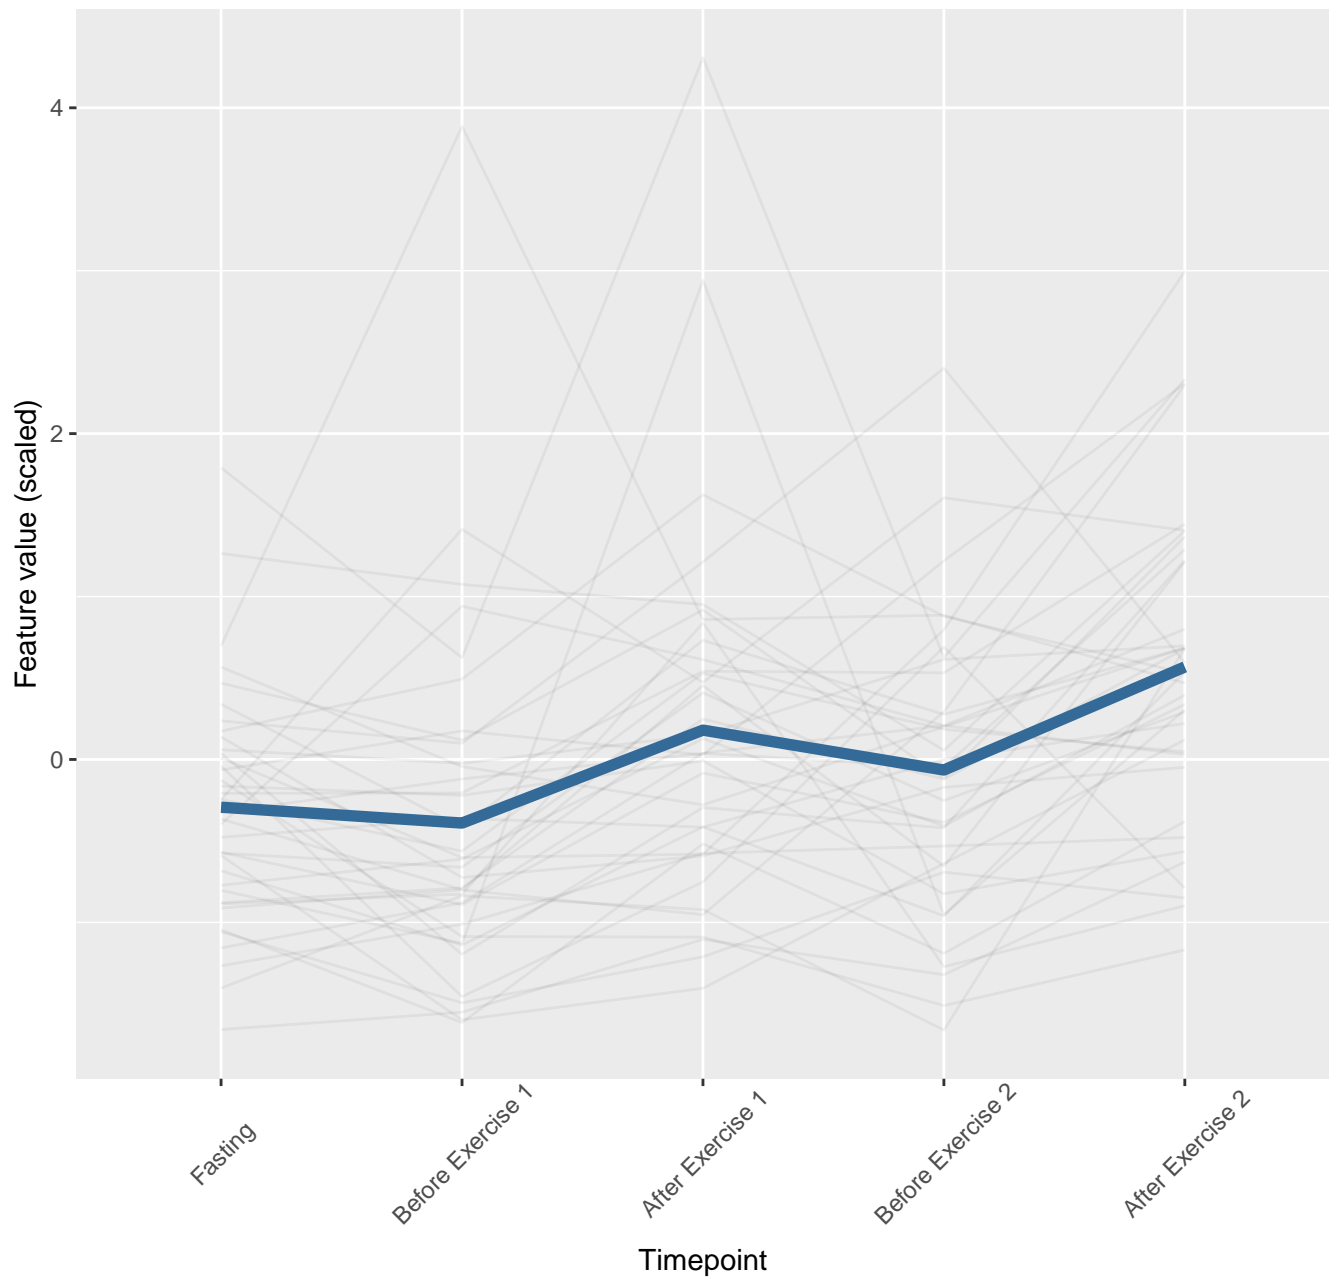

Line plot of TG(18:2/18:1/16:0)

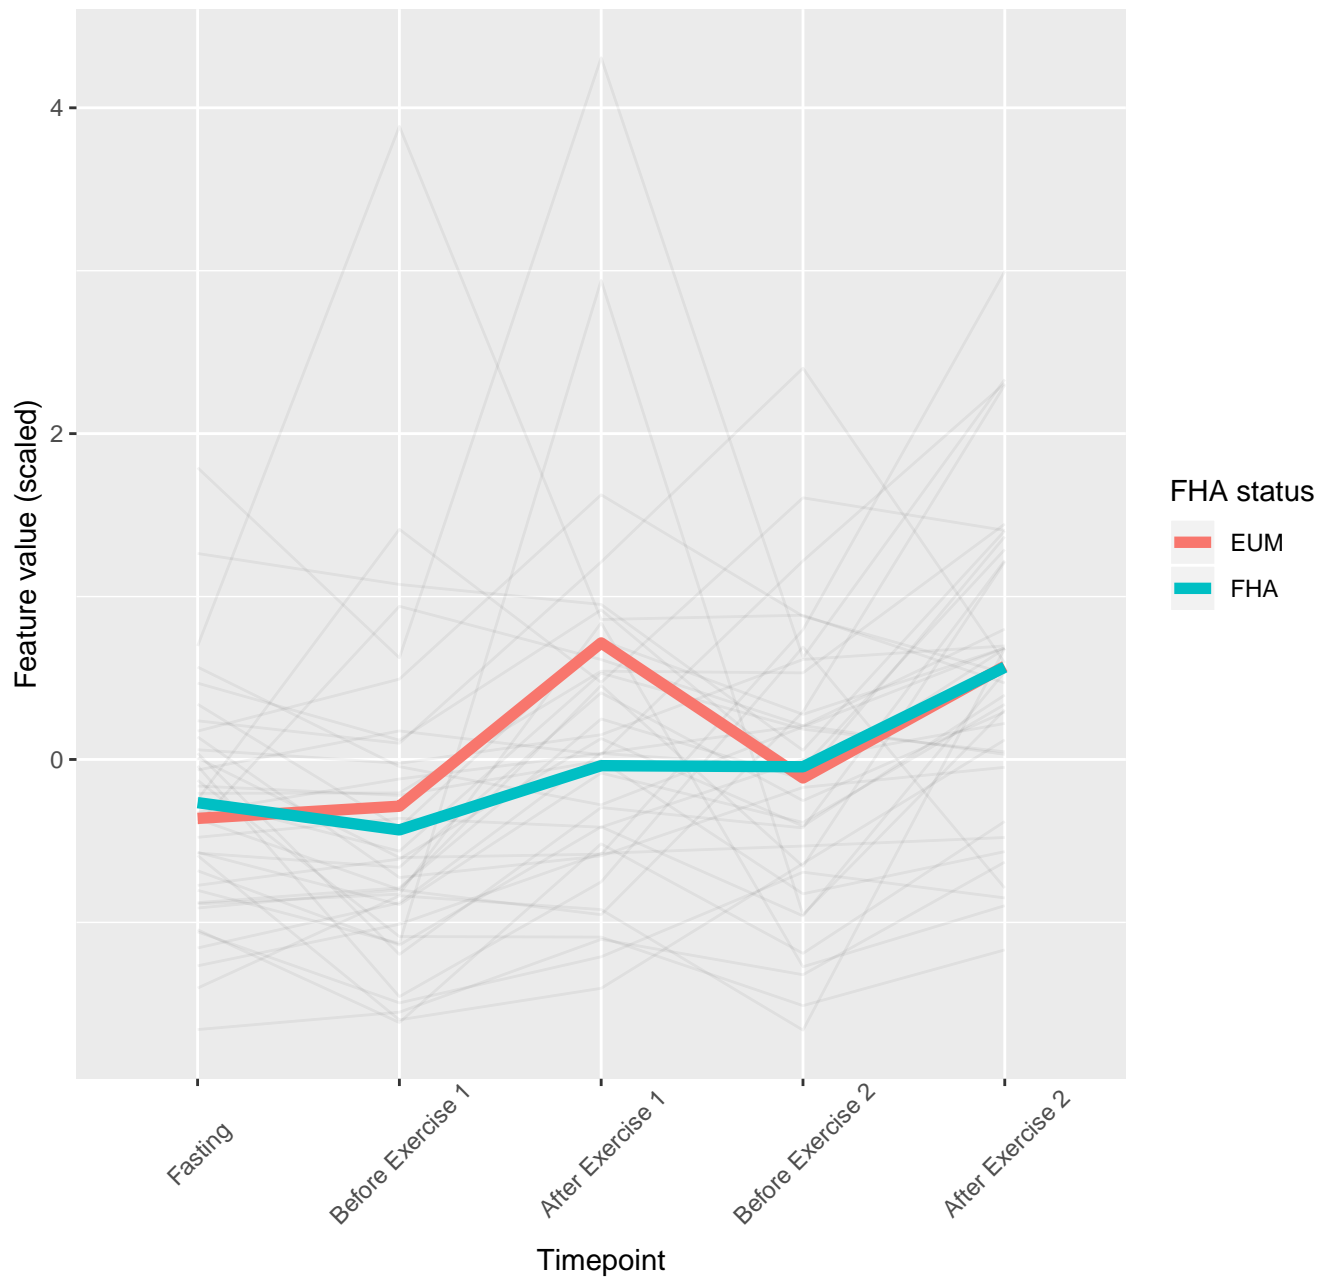

Line plot of TG(18:2/18:1/16:0)

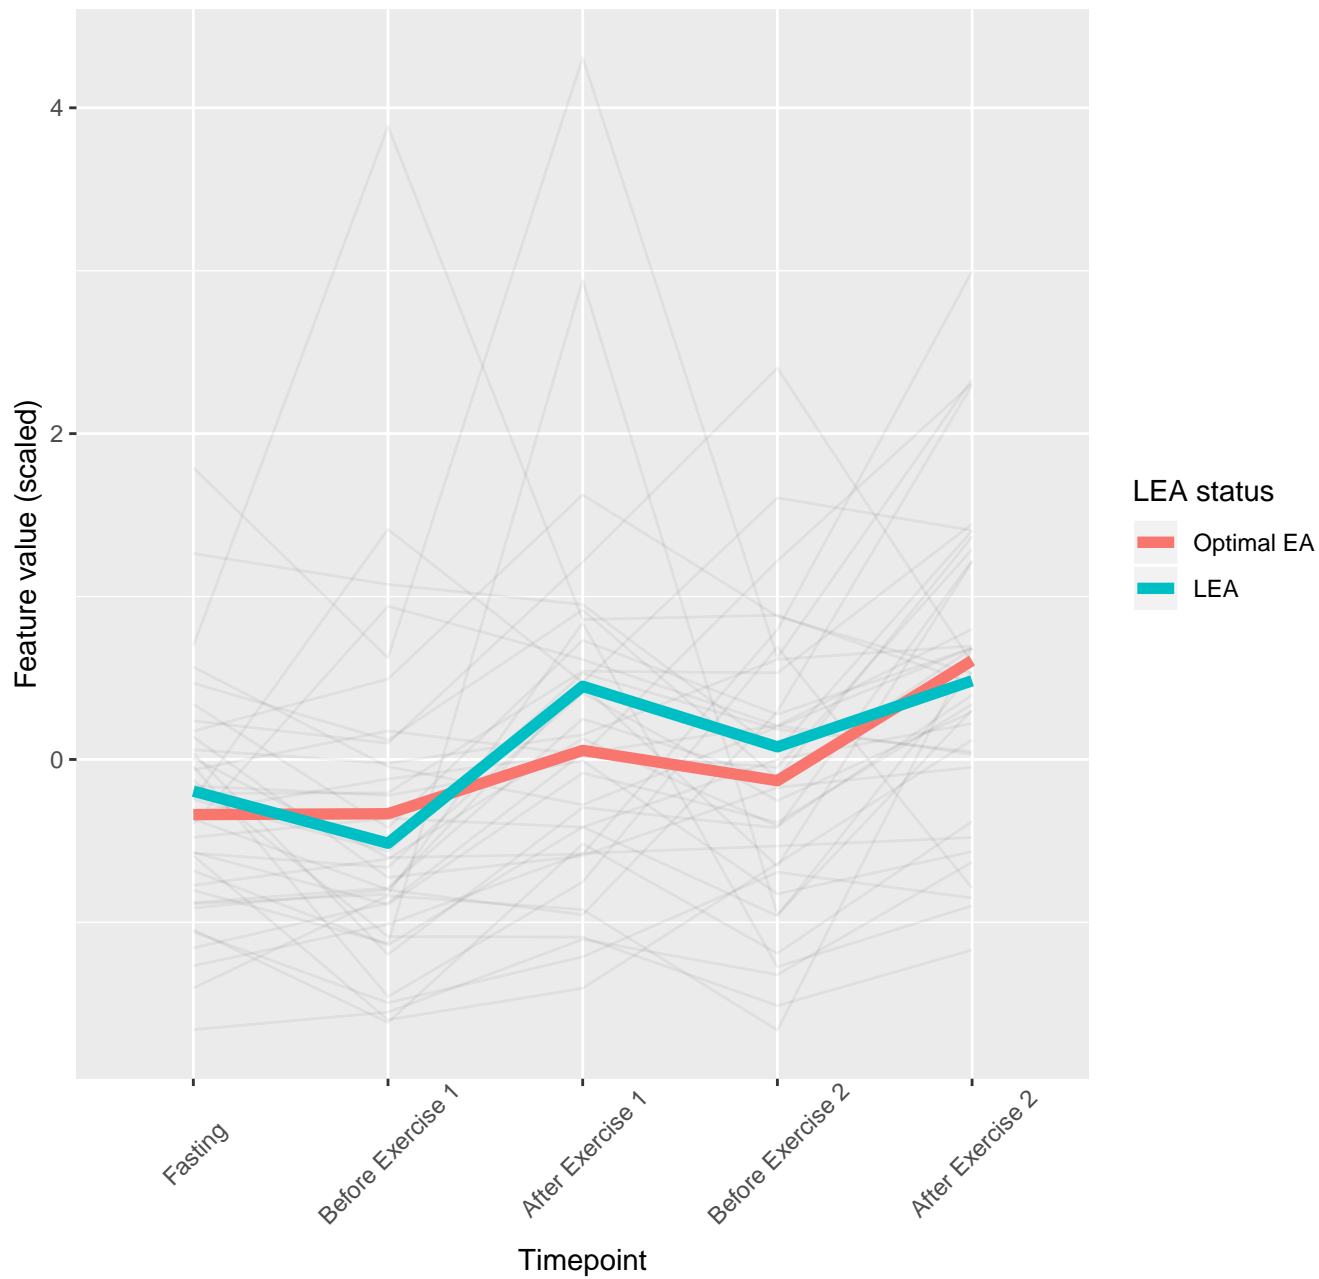

Line plot of TG(18:2/18:1/18:1)

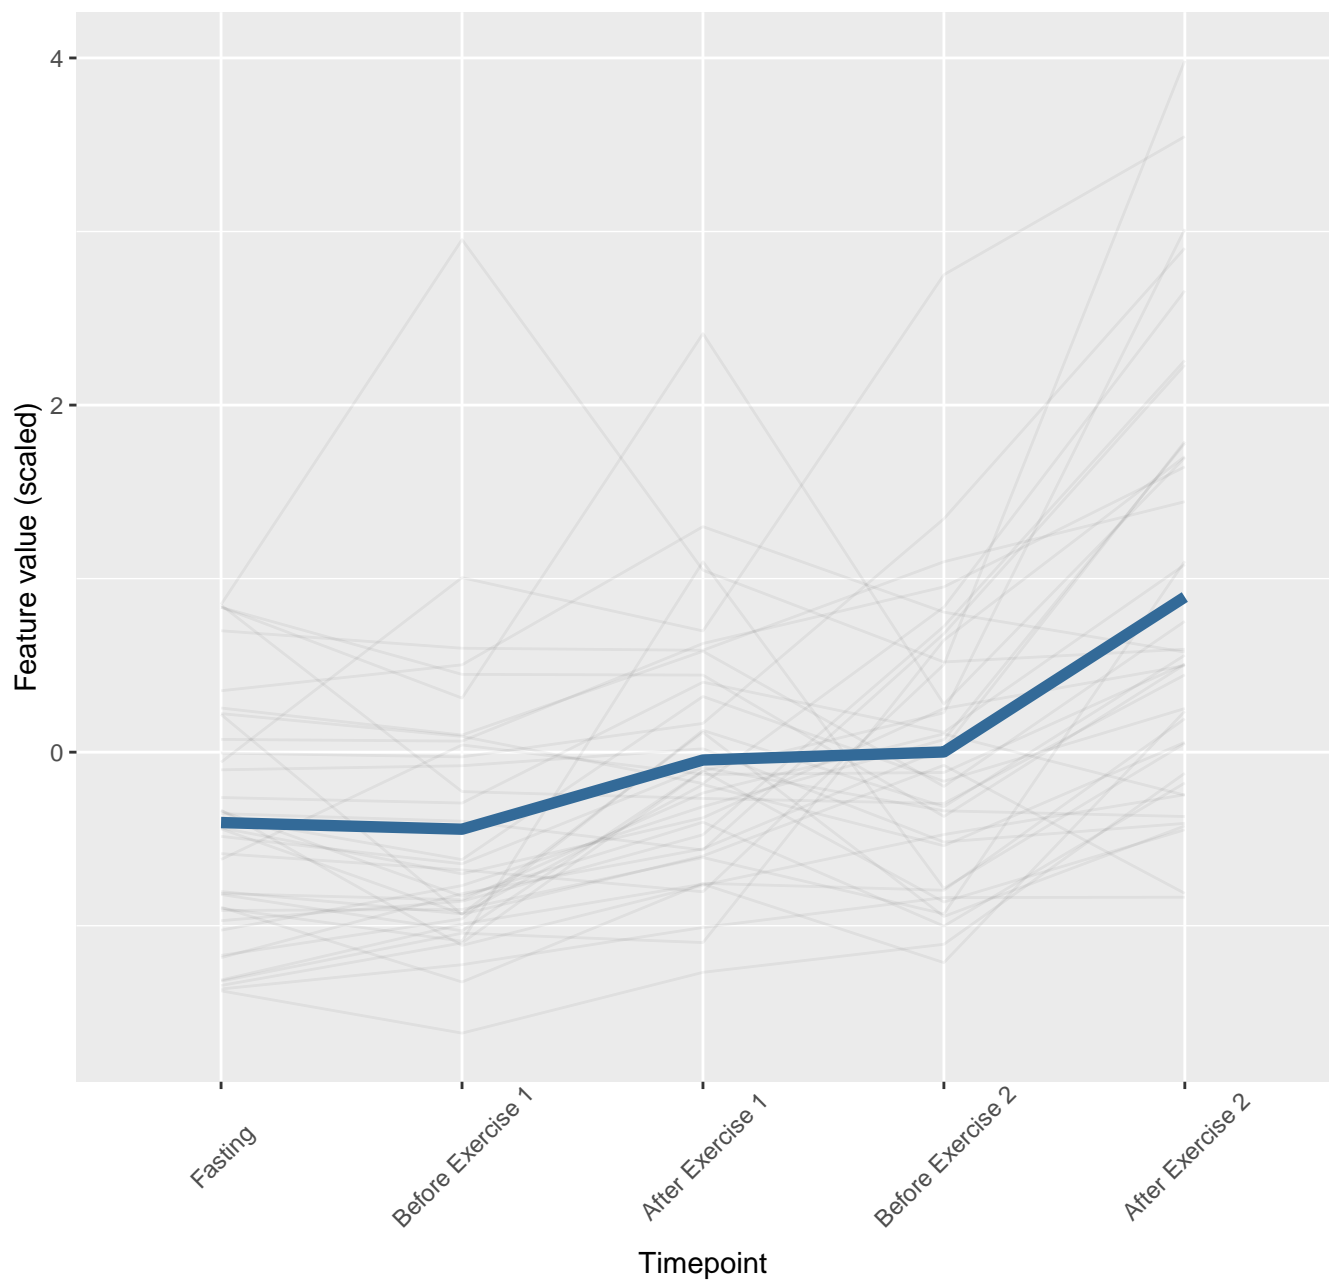

Line plot of TG(18:2/18:1/18:1)

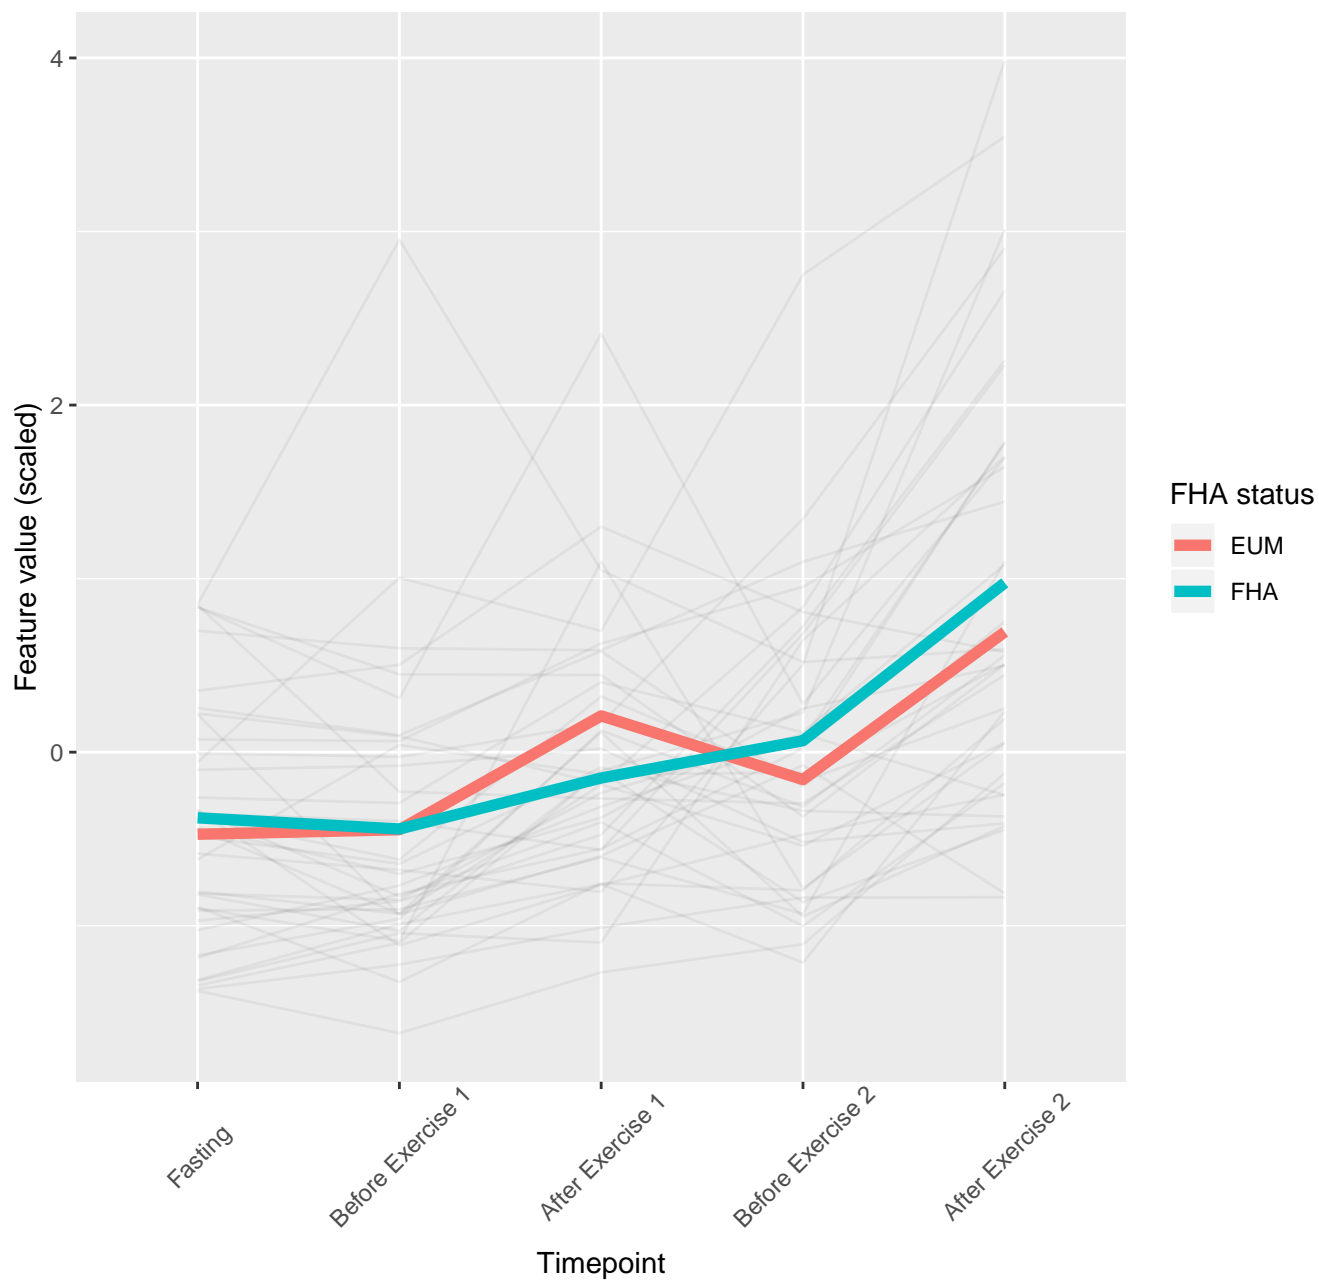



Line plot of TG(18:2/18:1/18:1)

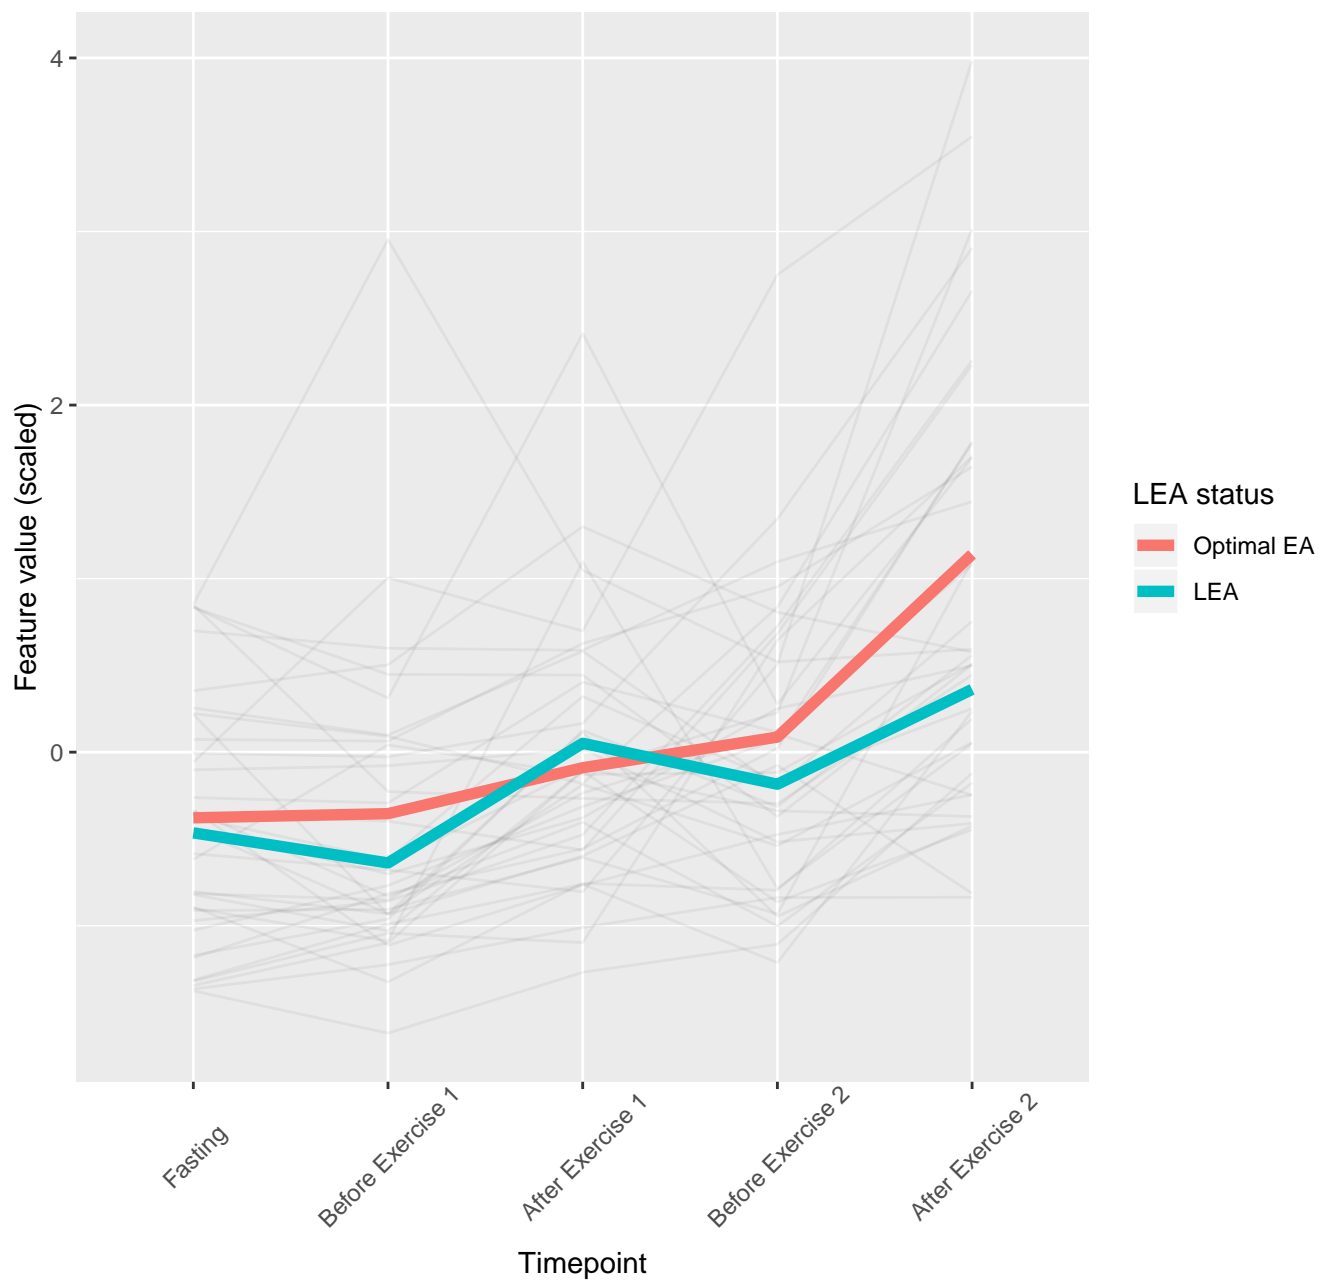

Line plot of TG(18:2/18:2/18:2) or TG(18:3/18:2/18:1)

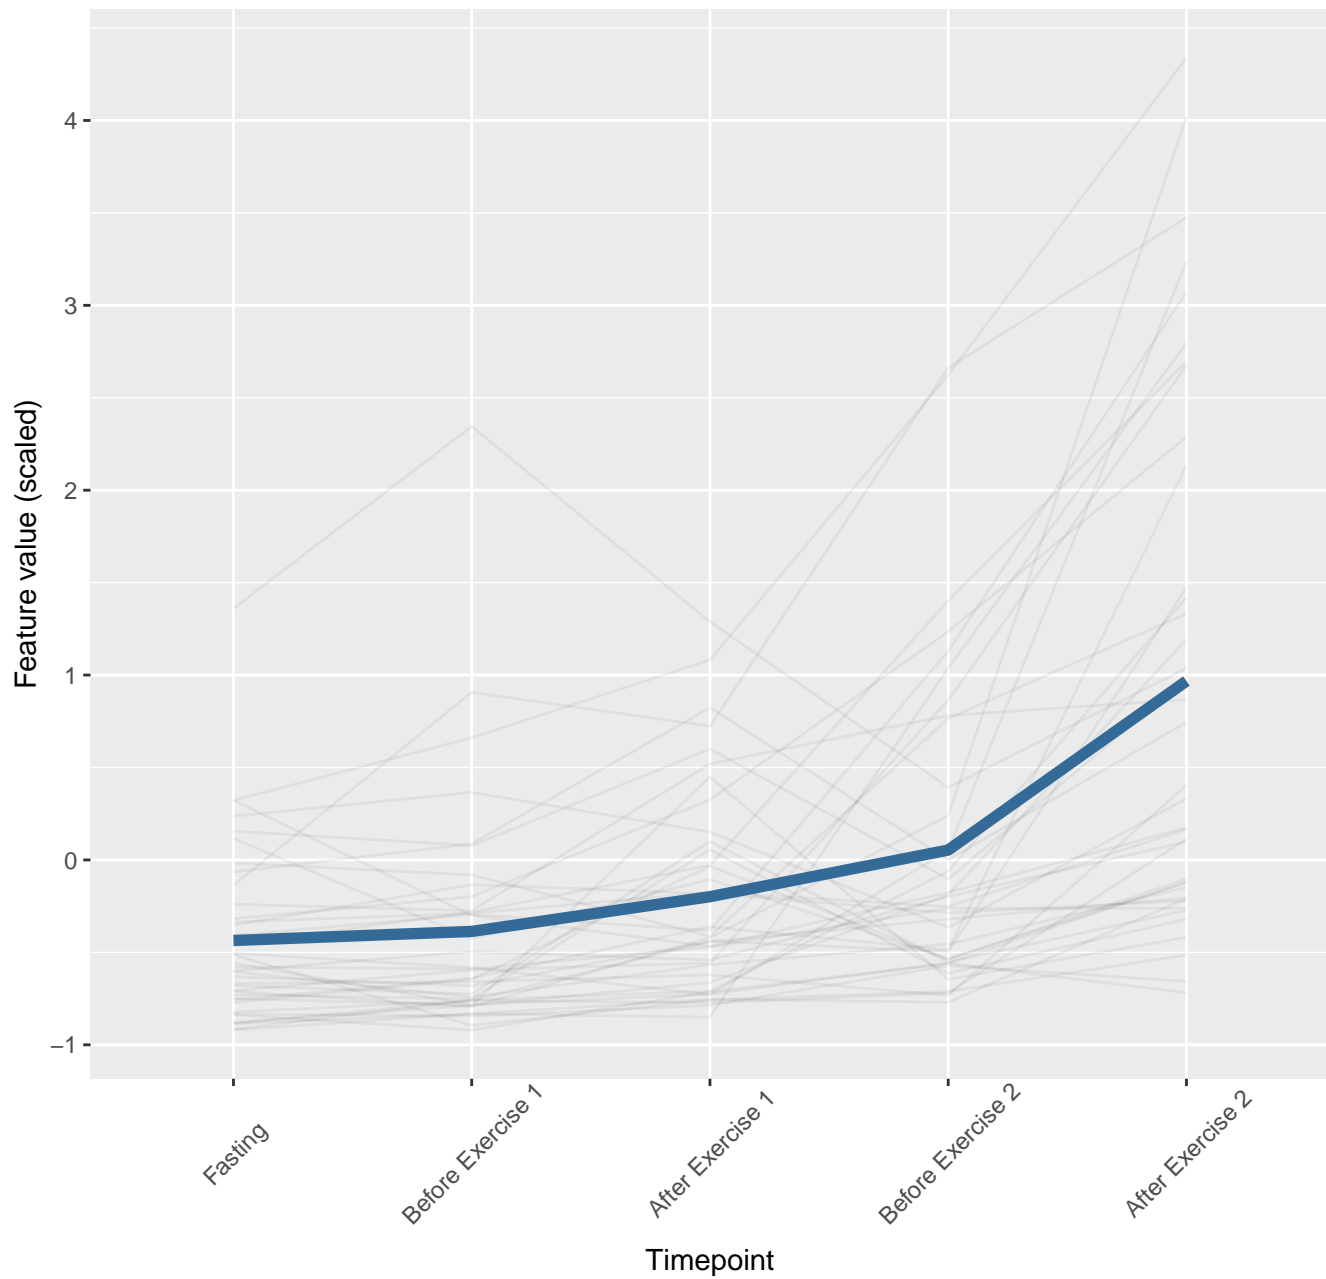

Line plot of TG(18:2/18:2/18:2) or TG(18:3/18:2/18:1)

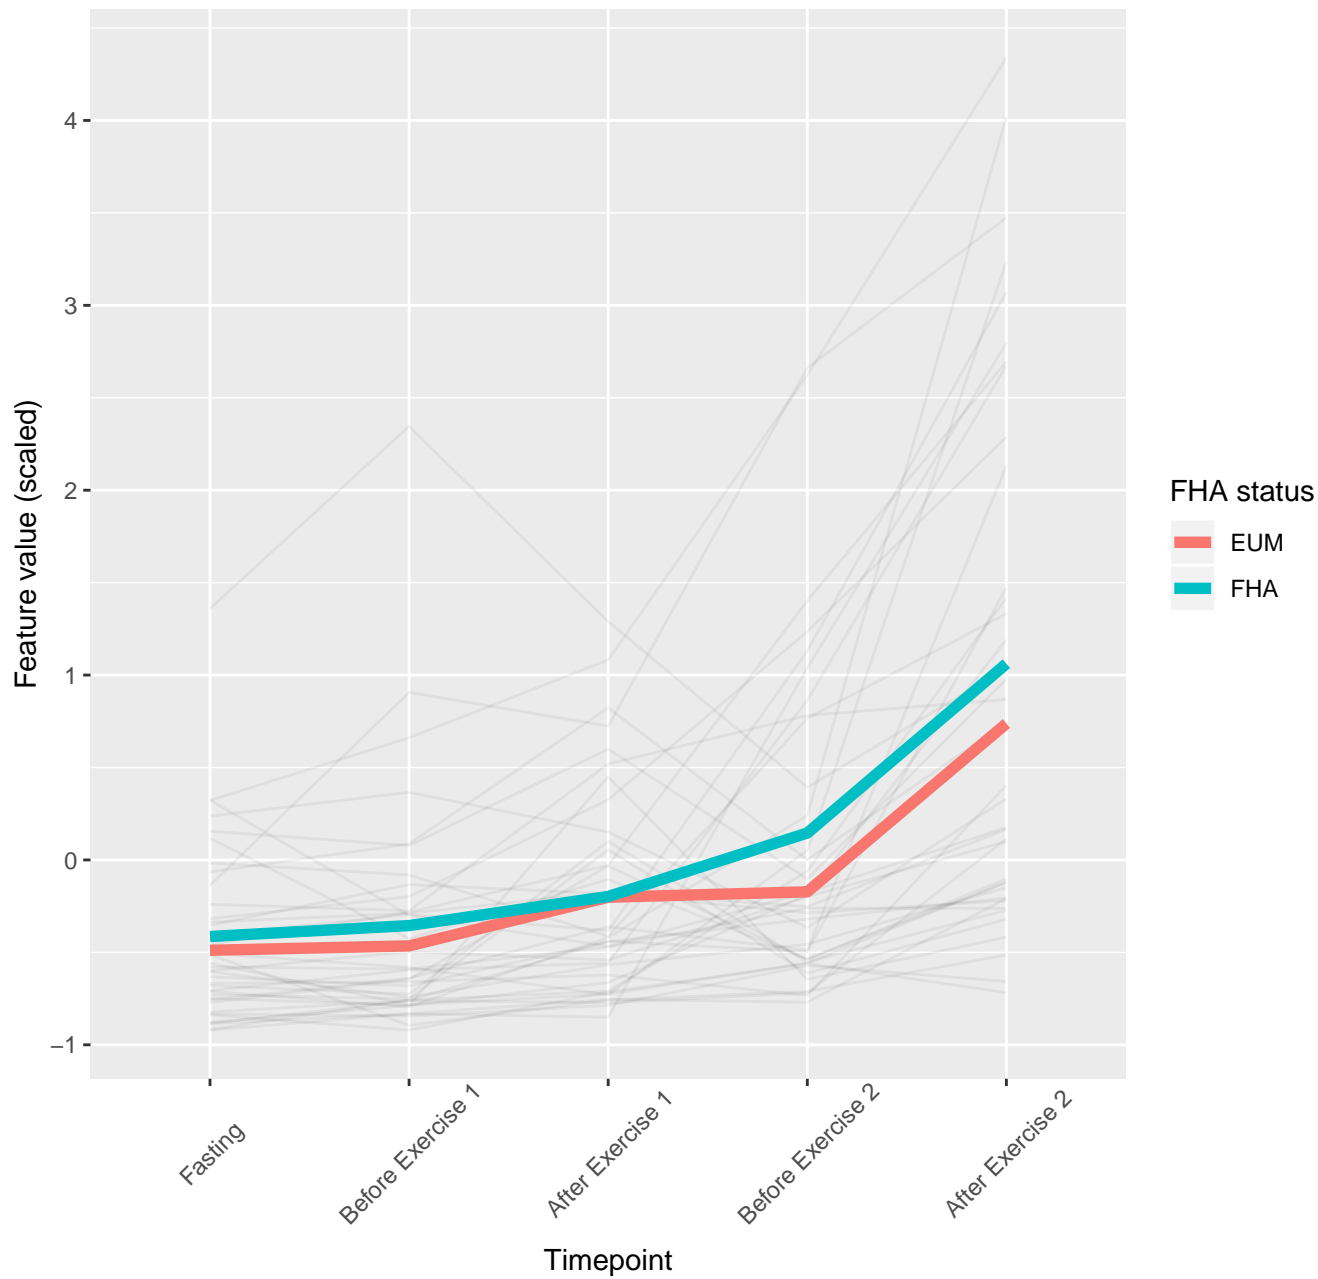

Line plot of TG(18:2/18:2/18:2) or TG(18:3/18:2/18:1)

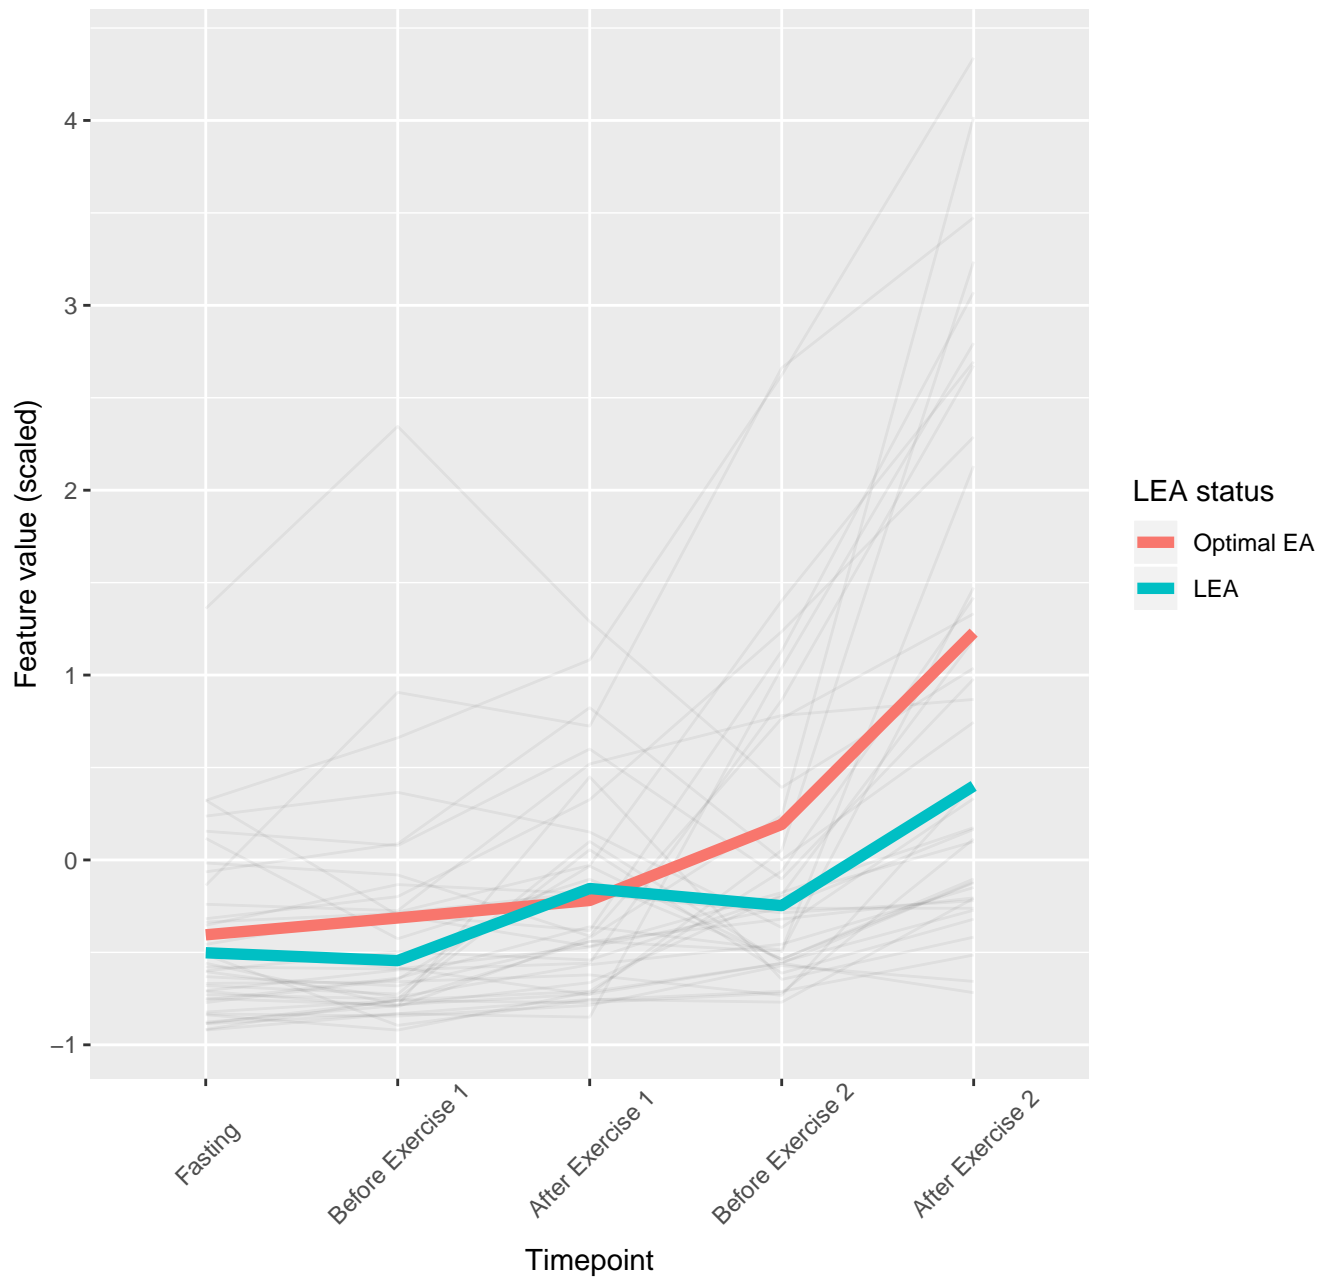

Line plot of TG(18:2/22:5/16:0)

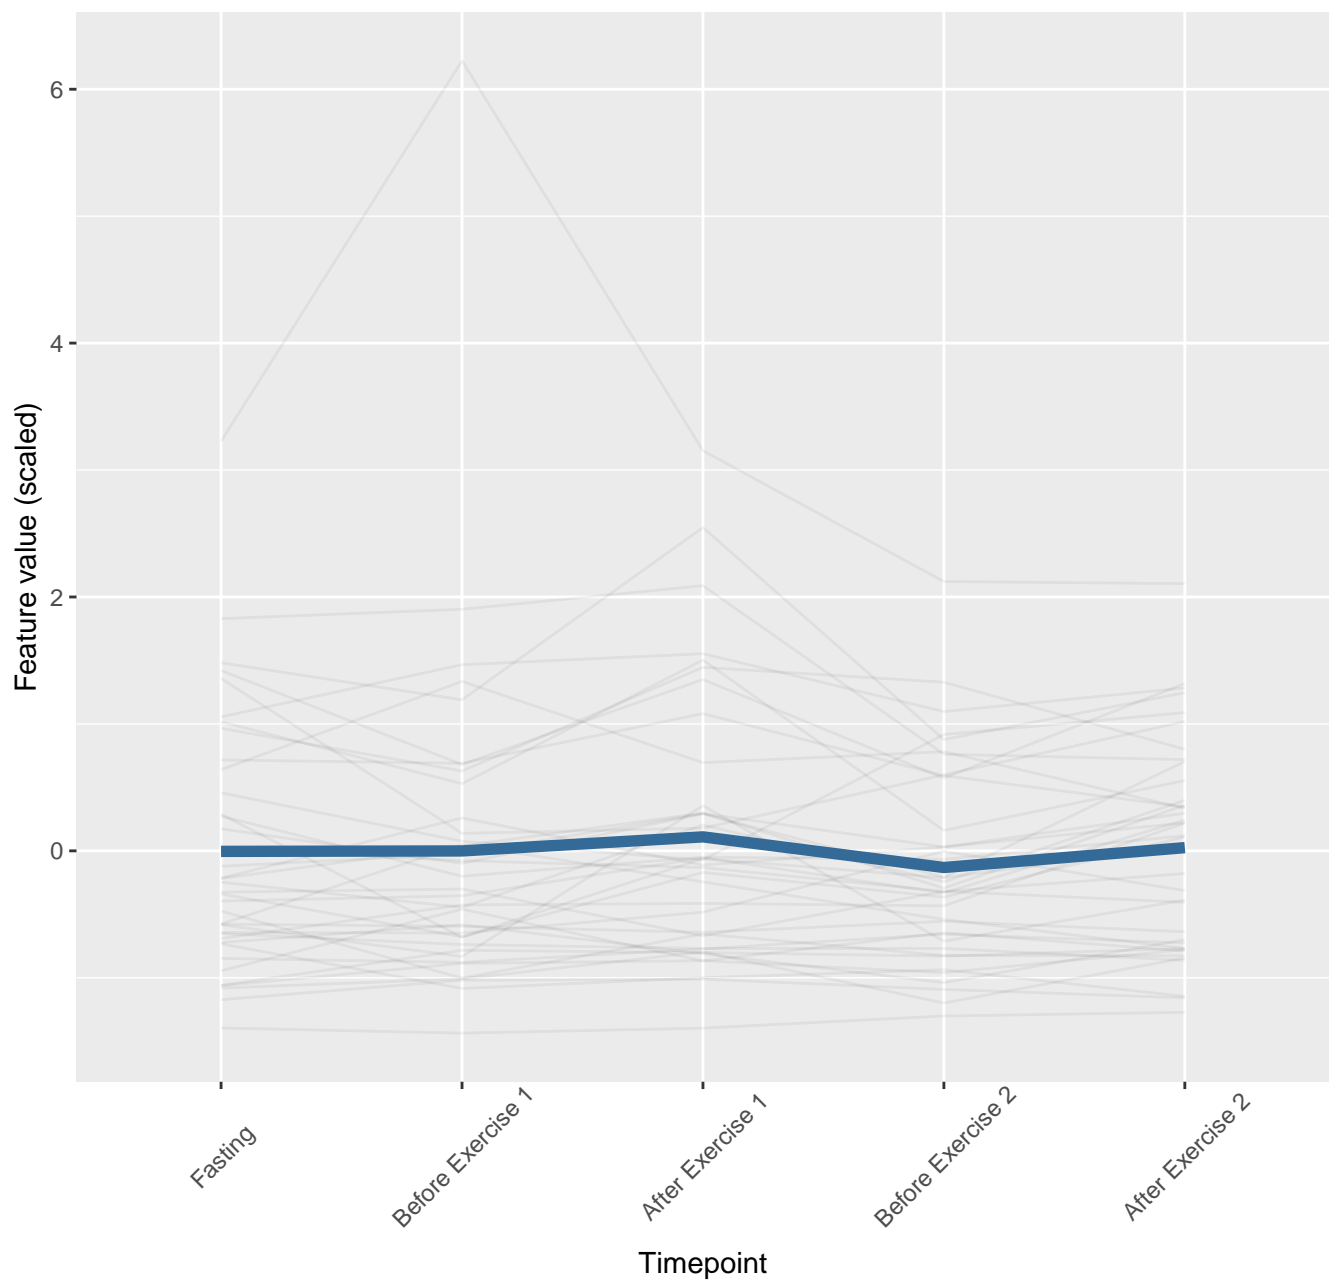

Line plot of TG(18:2/22:5/16:0)

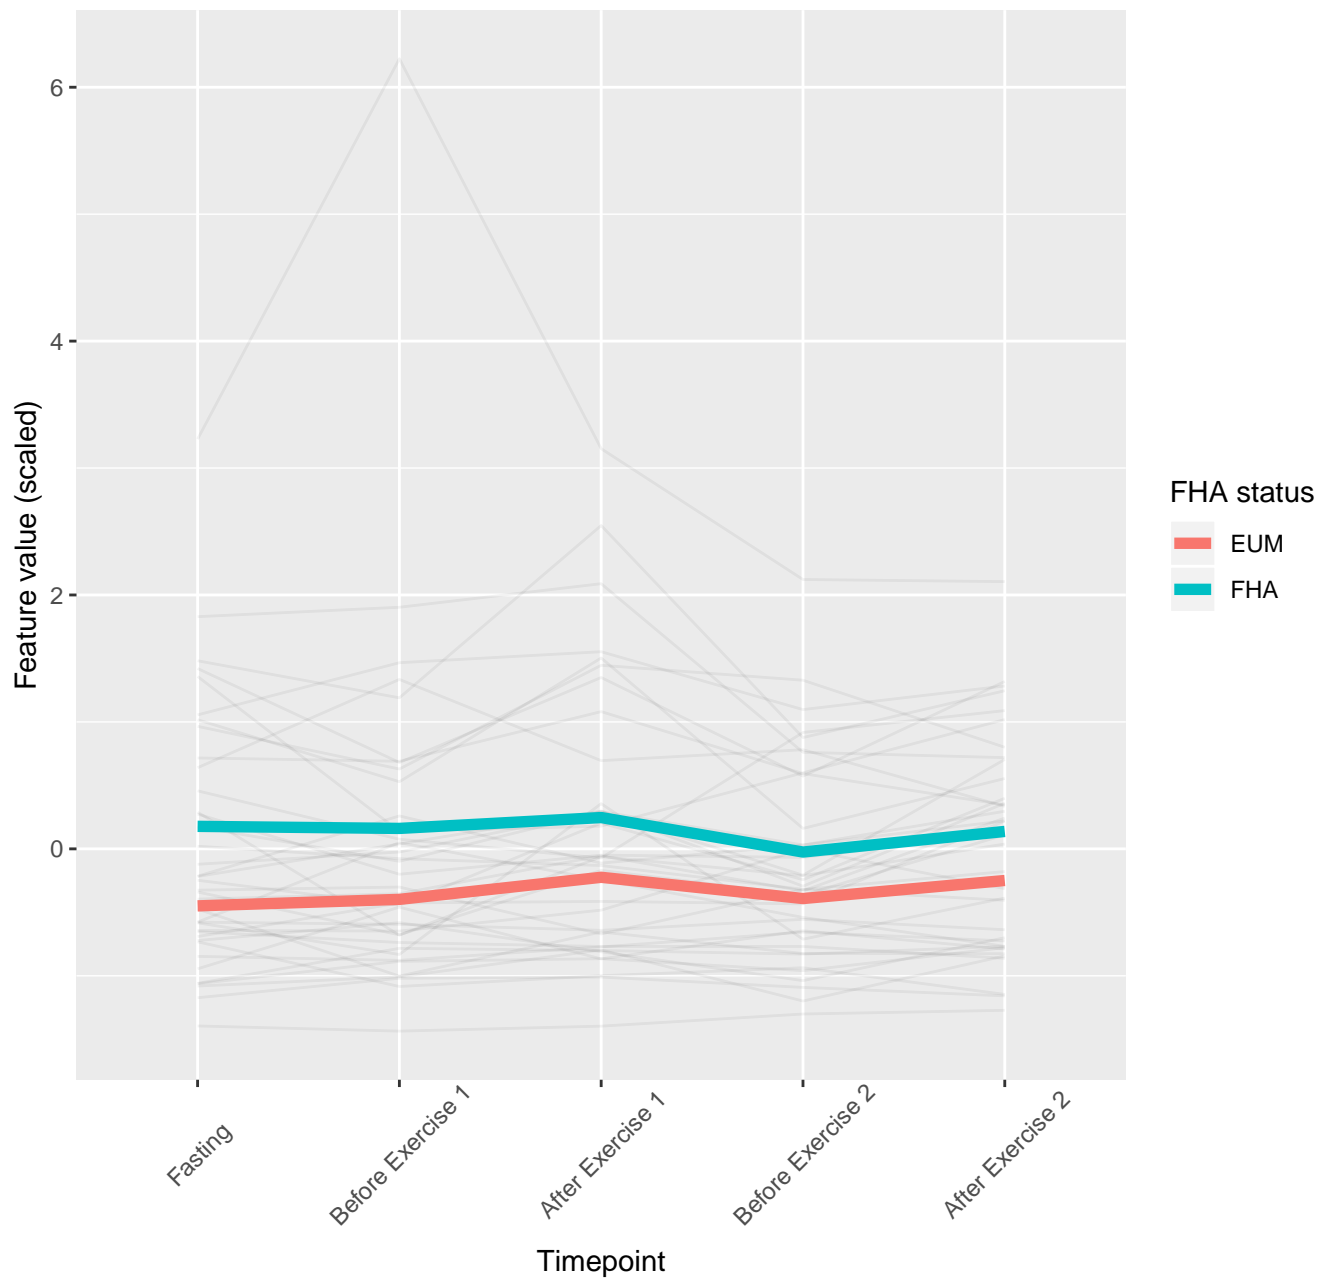

Line plot of TG(18:2/22:5/16:0)

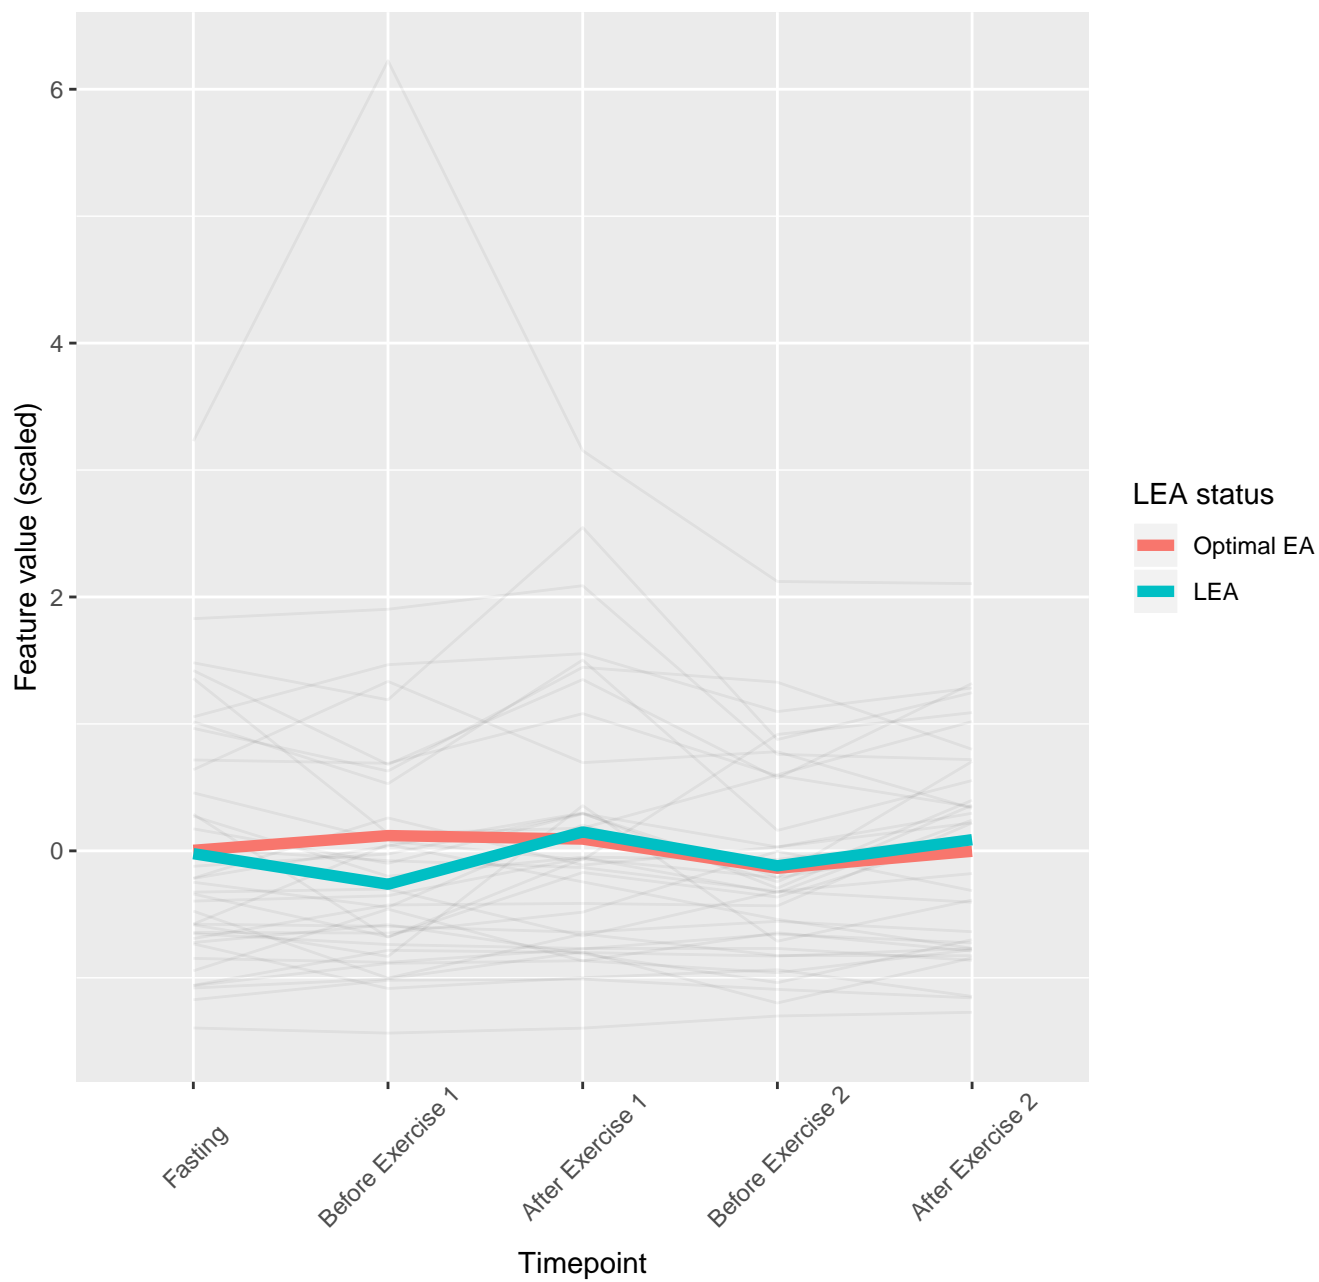

Line plot of TG(40:0)

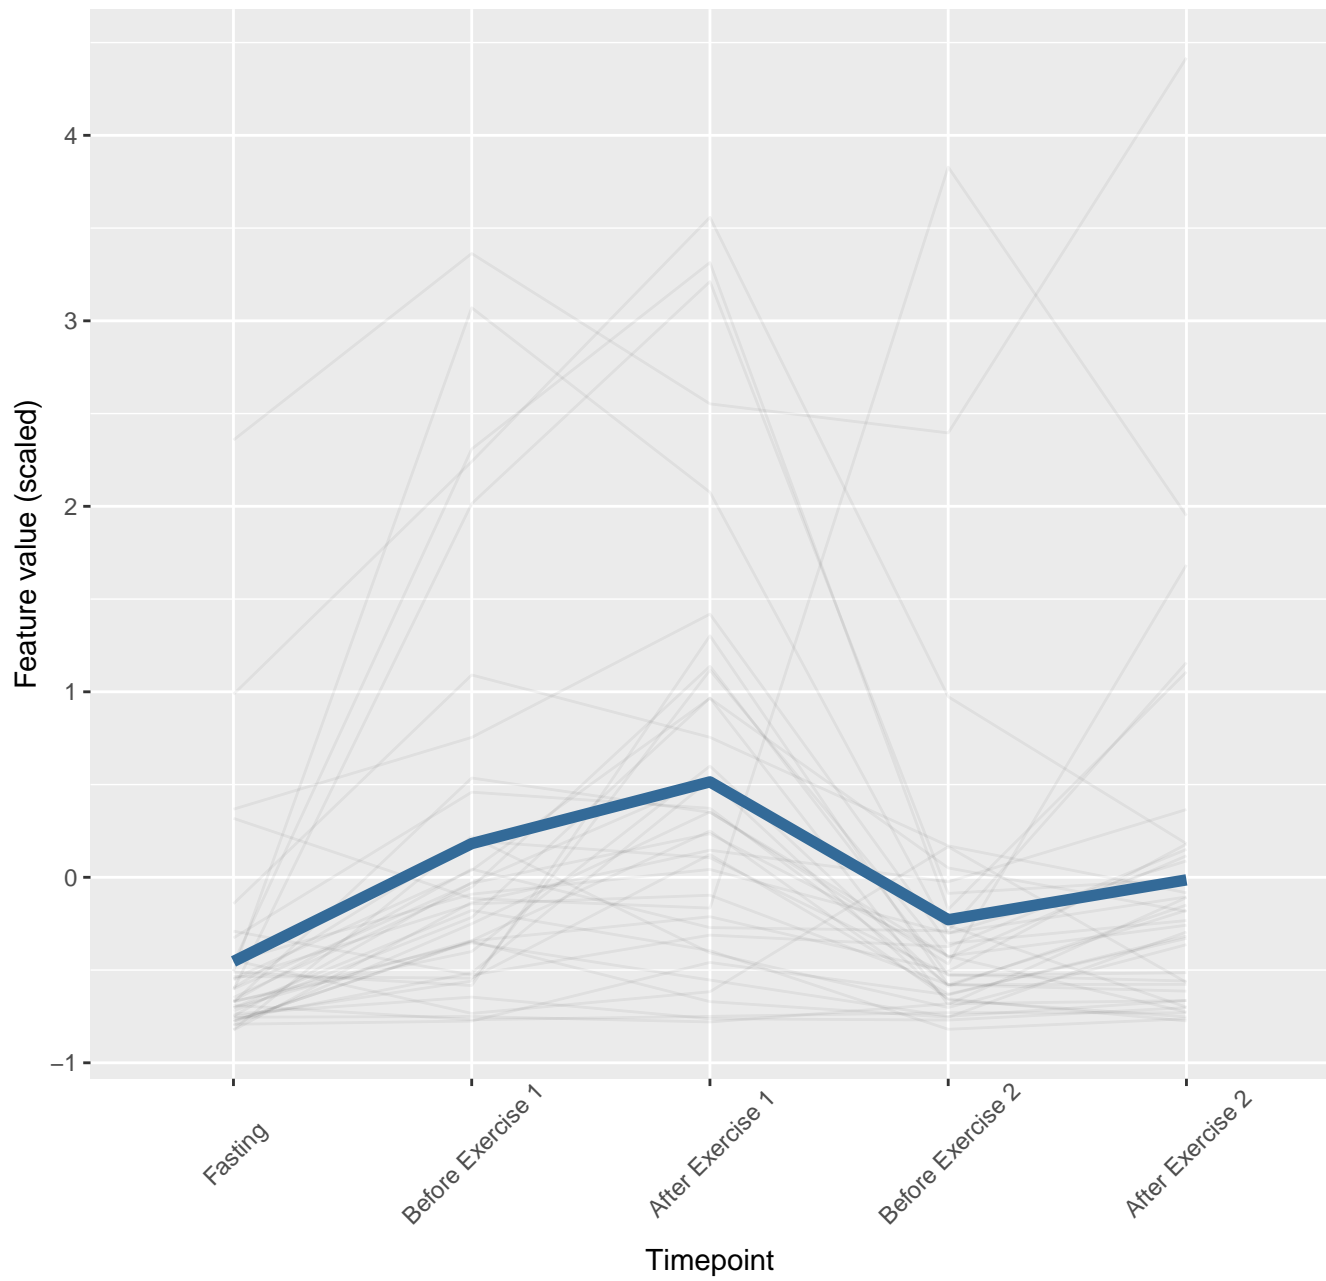



Line plot of TG(40:0)

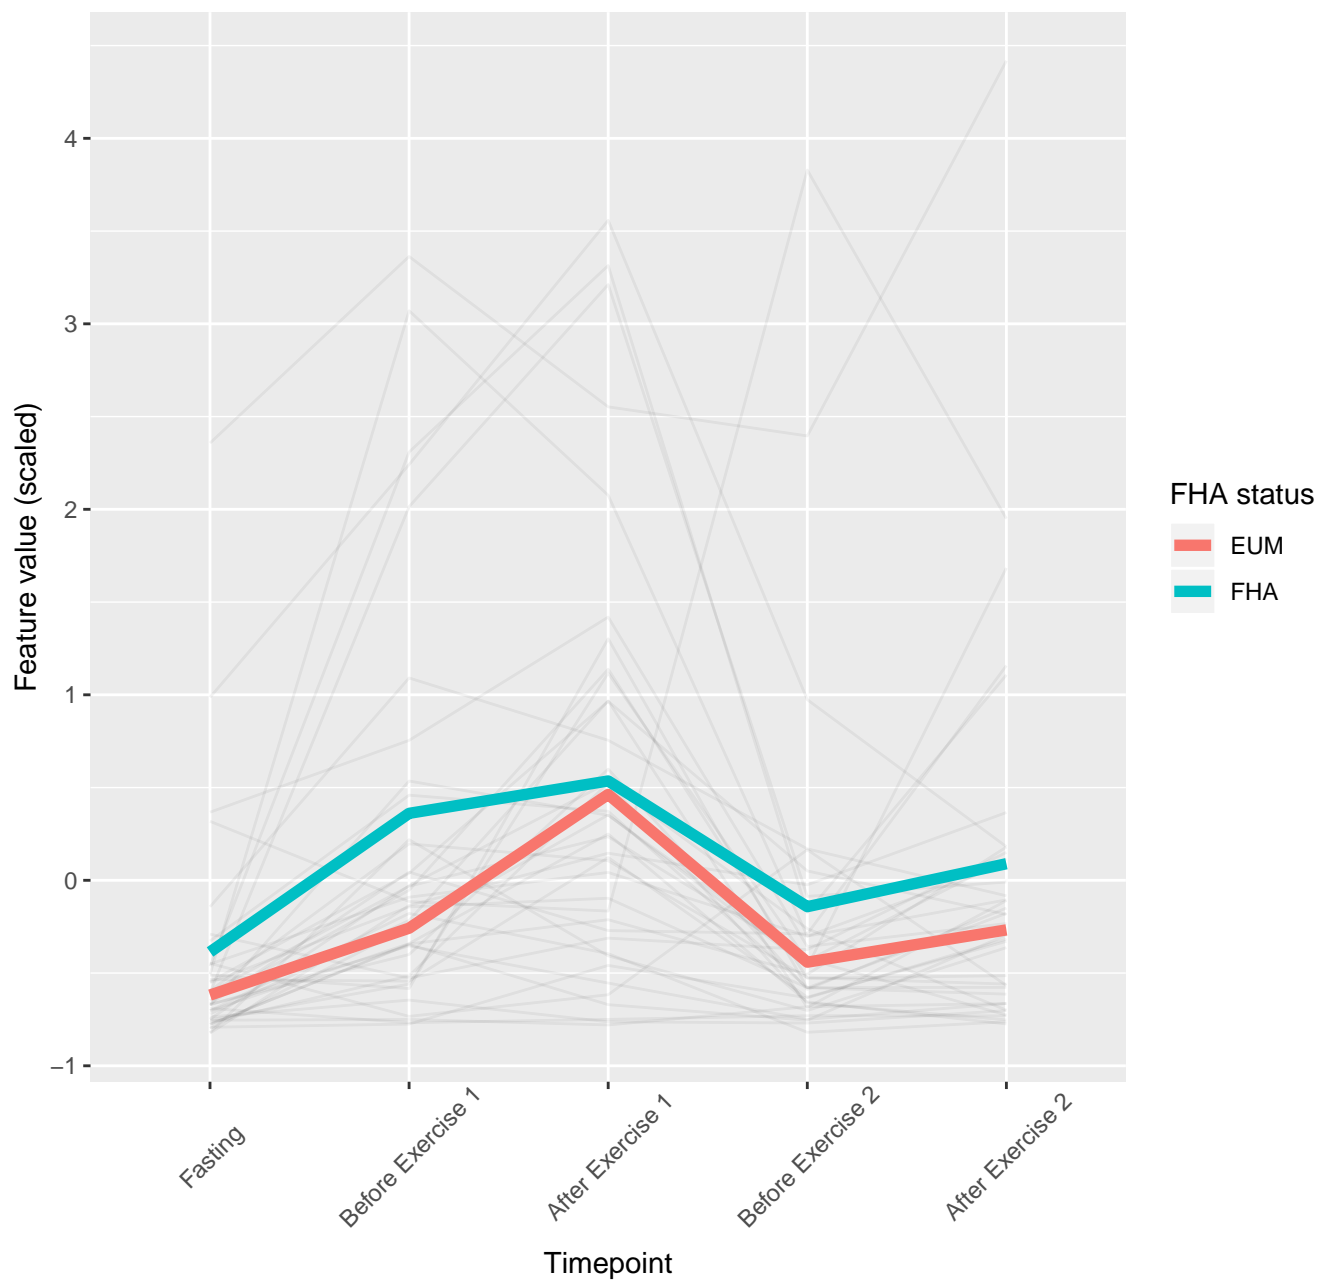

Line plot of TG(40:0)

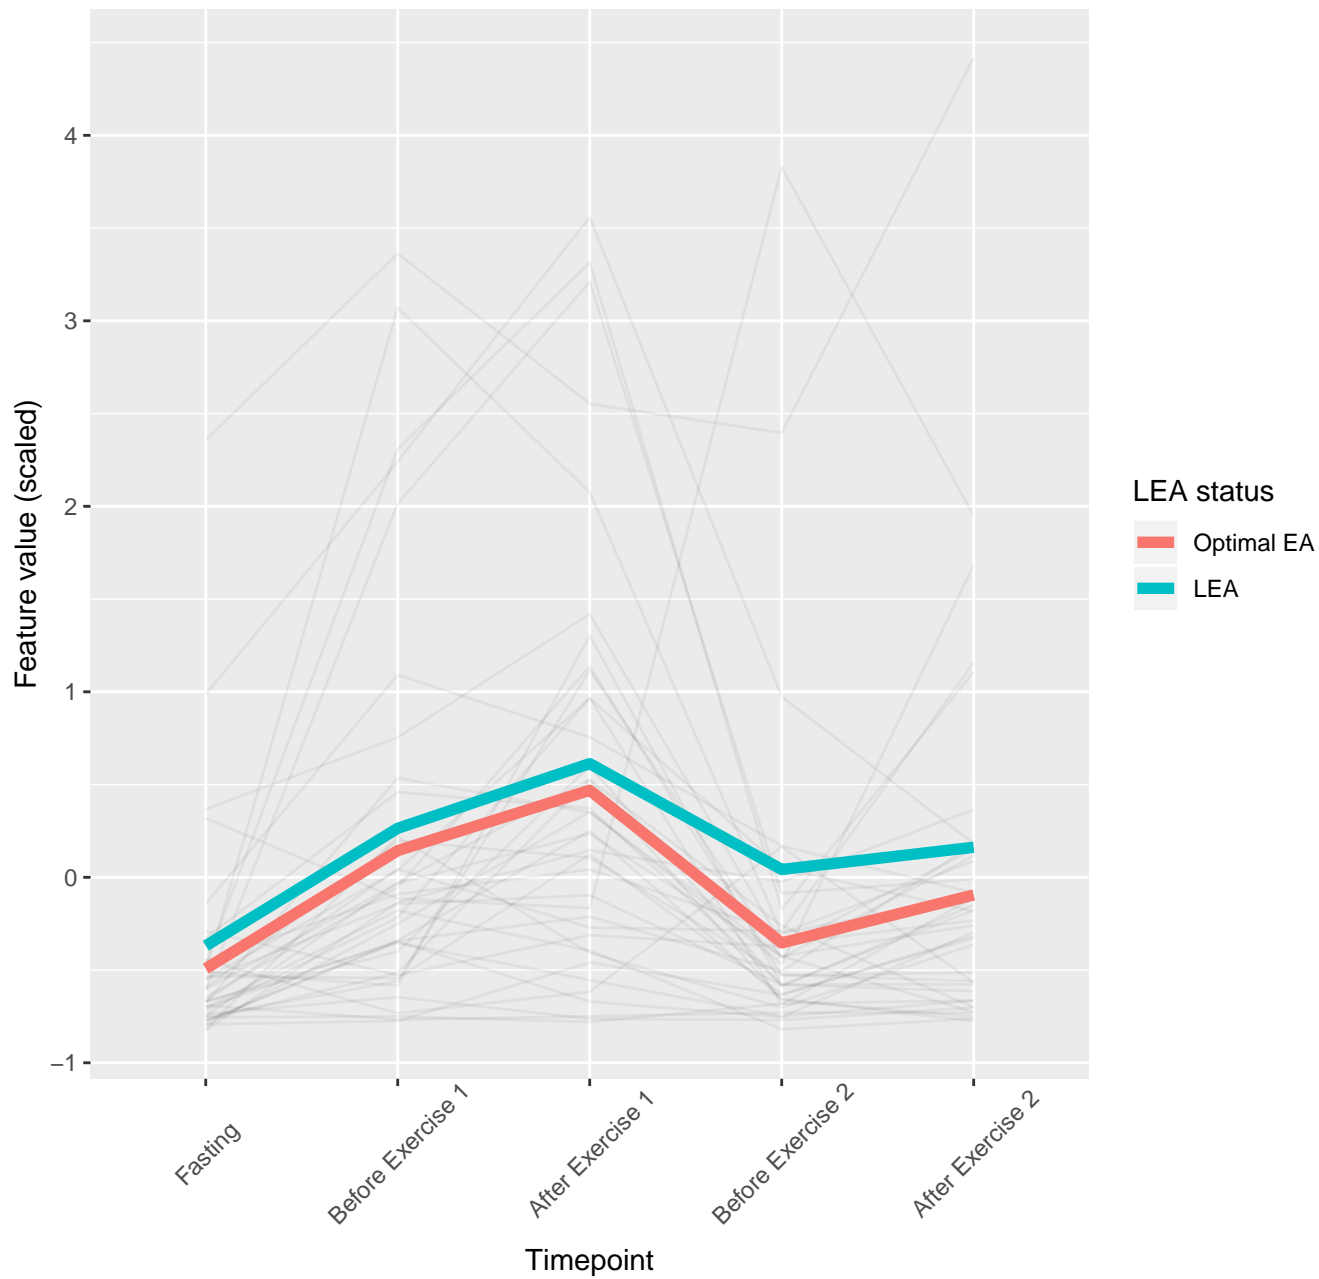

Line plot of TG(40:1)

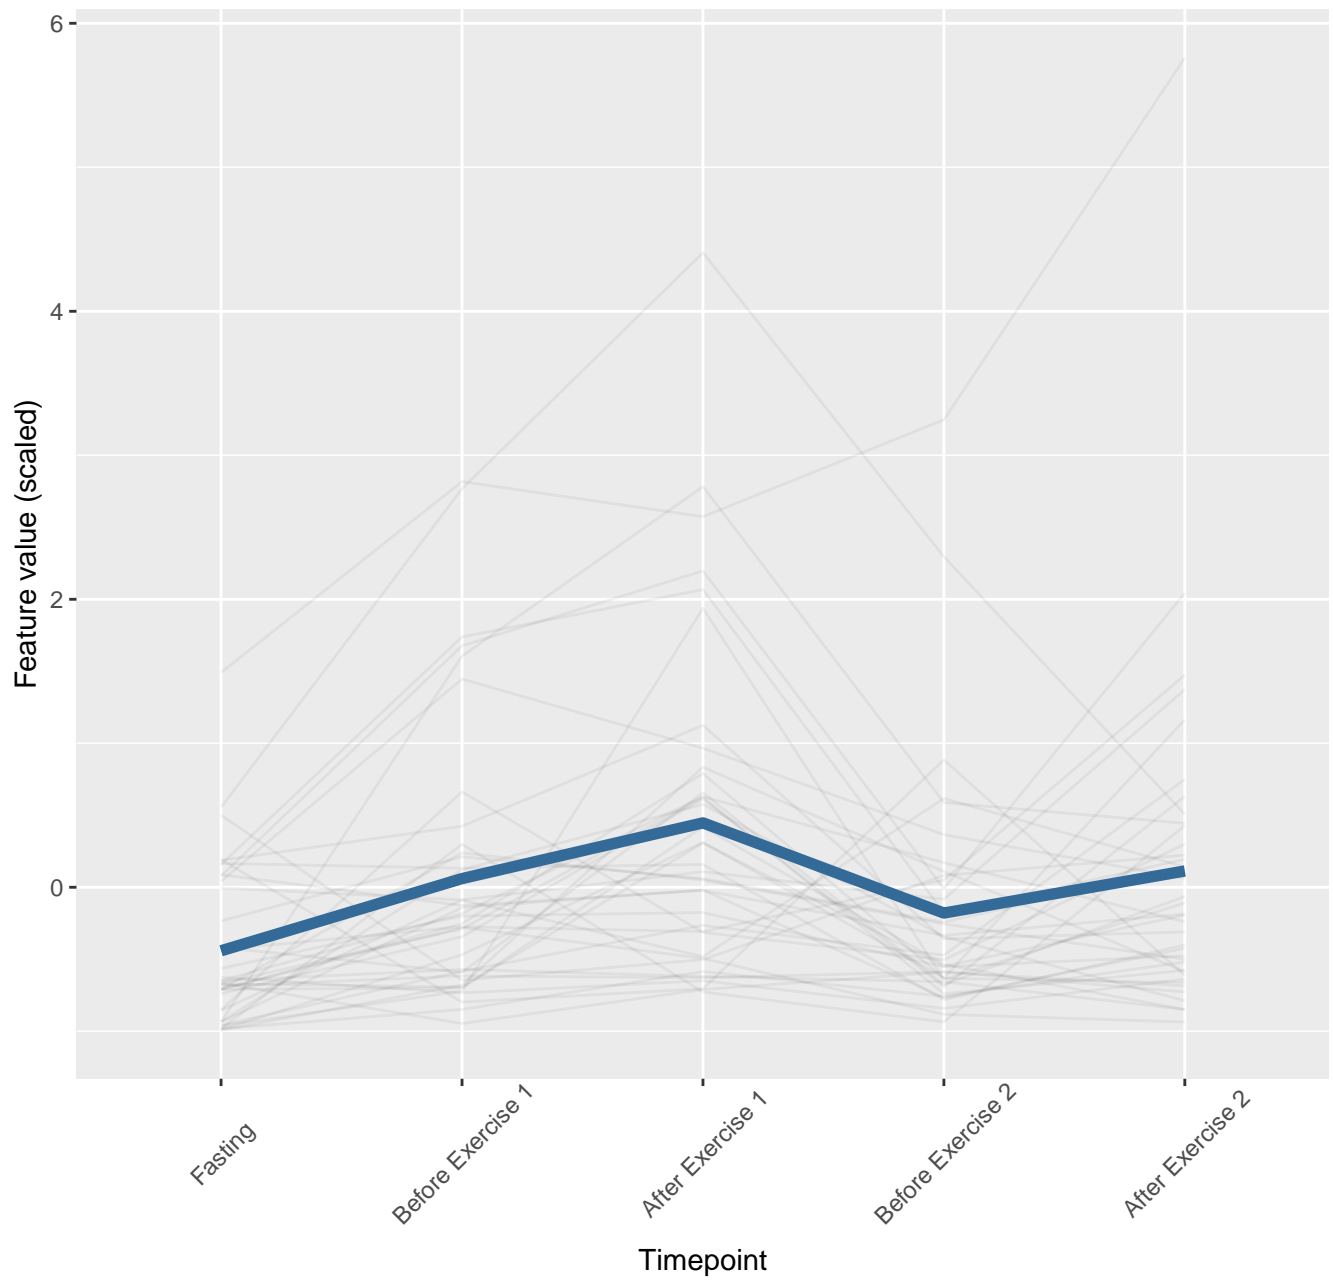

Line plot of TG(40:1)

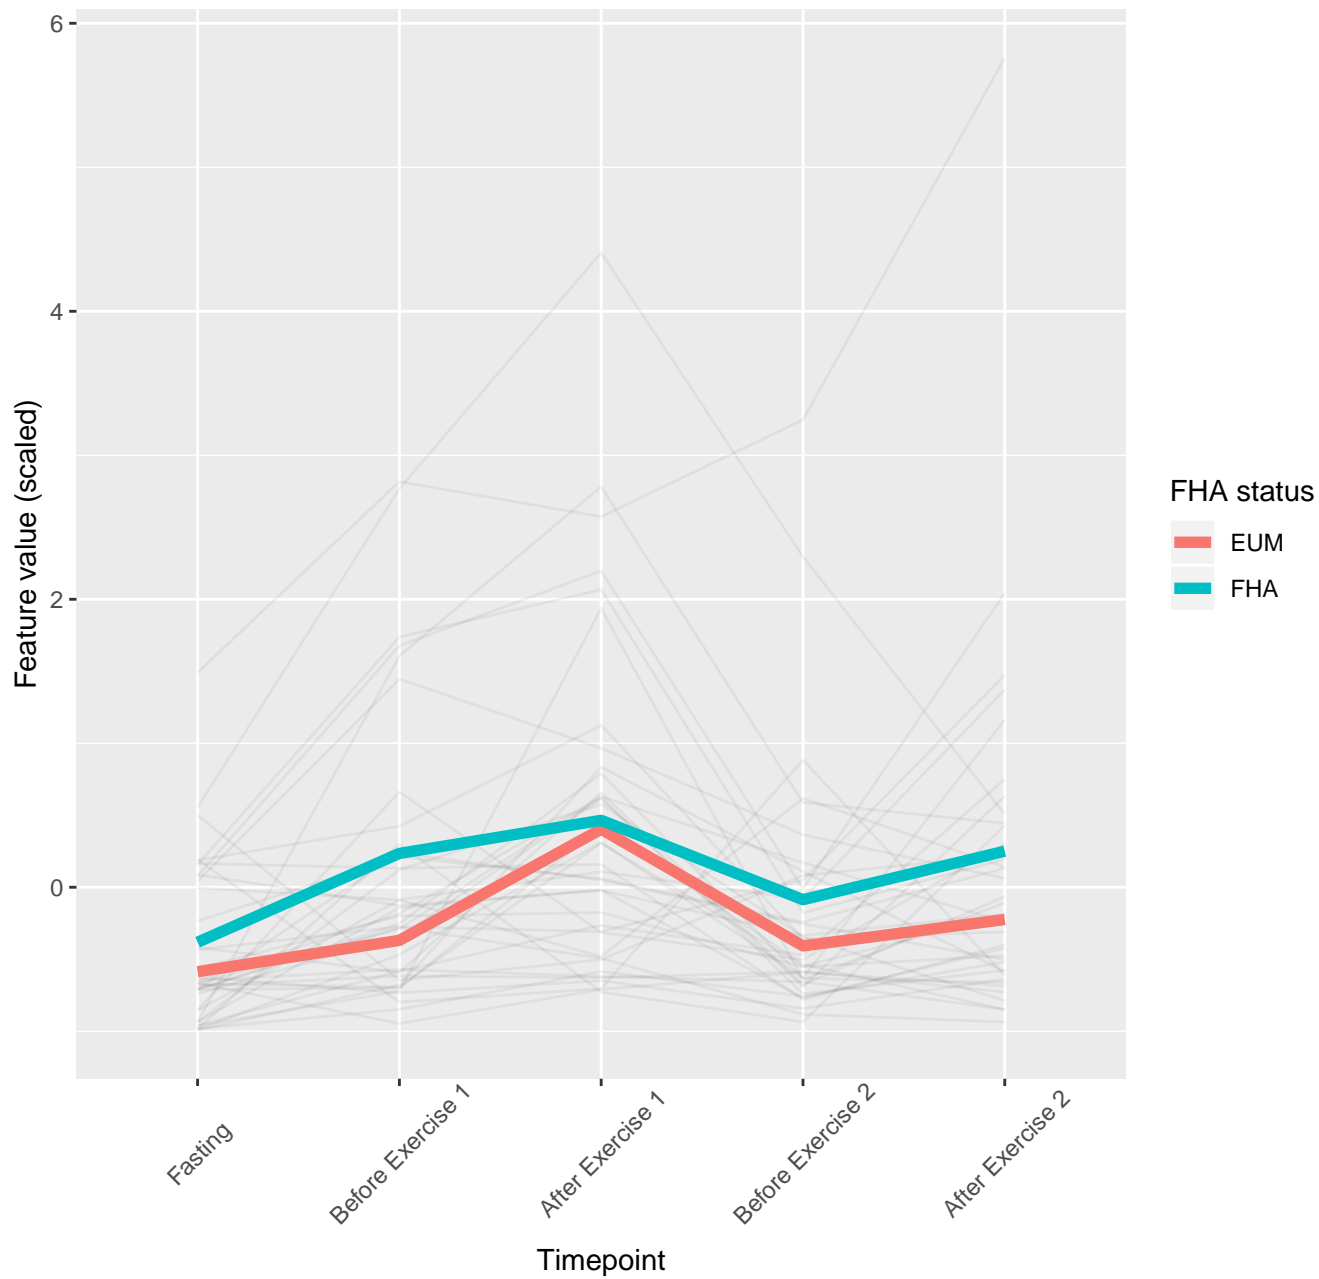

Line plot of TG(40:1)

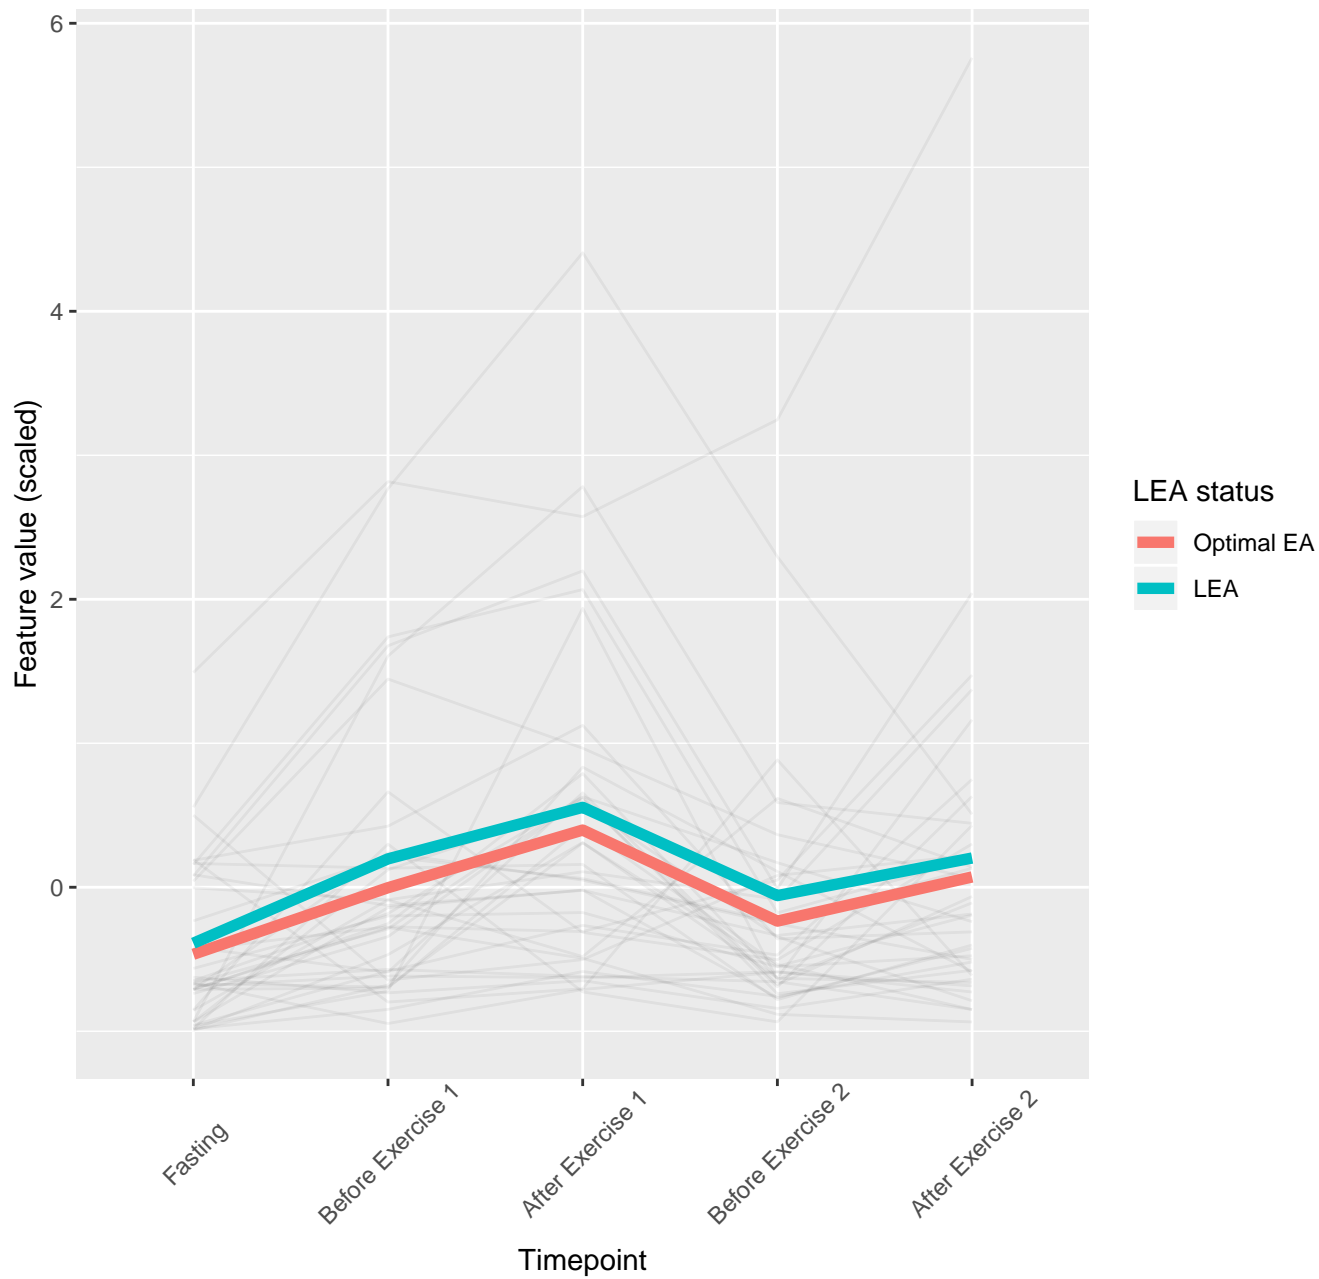

Line plot of TG(42:0)

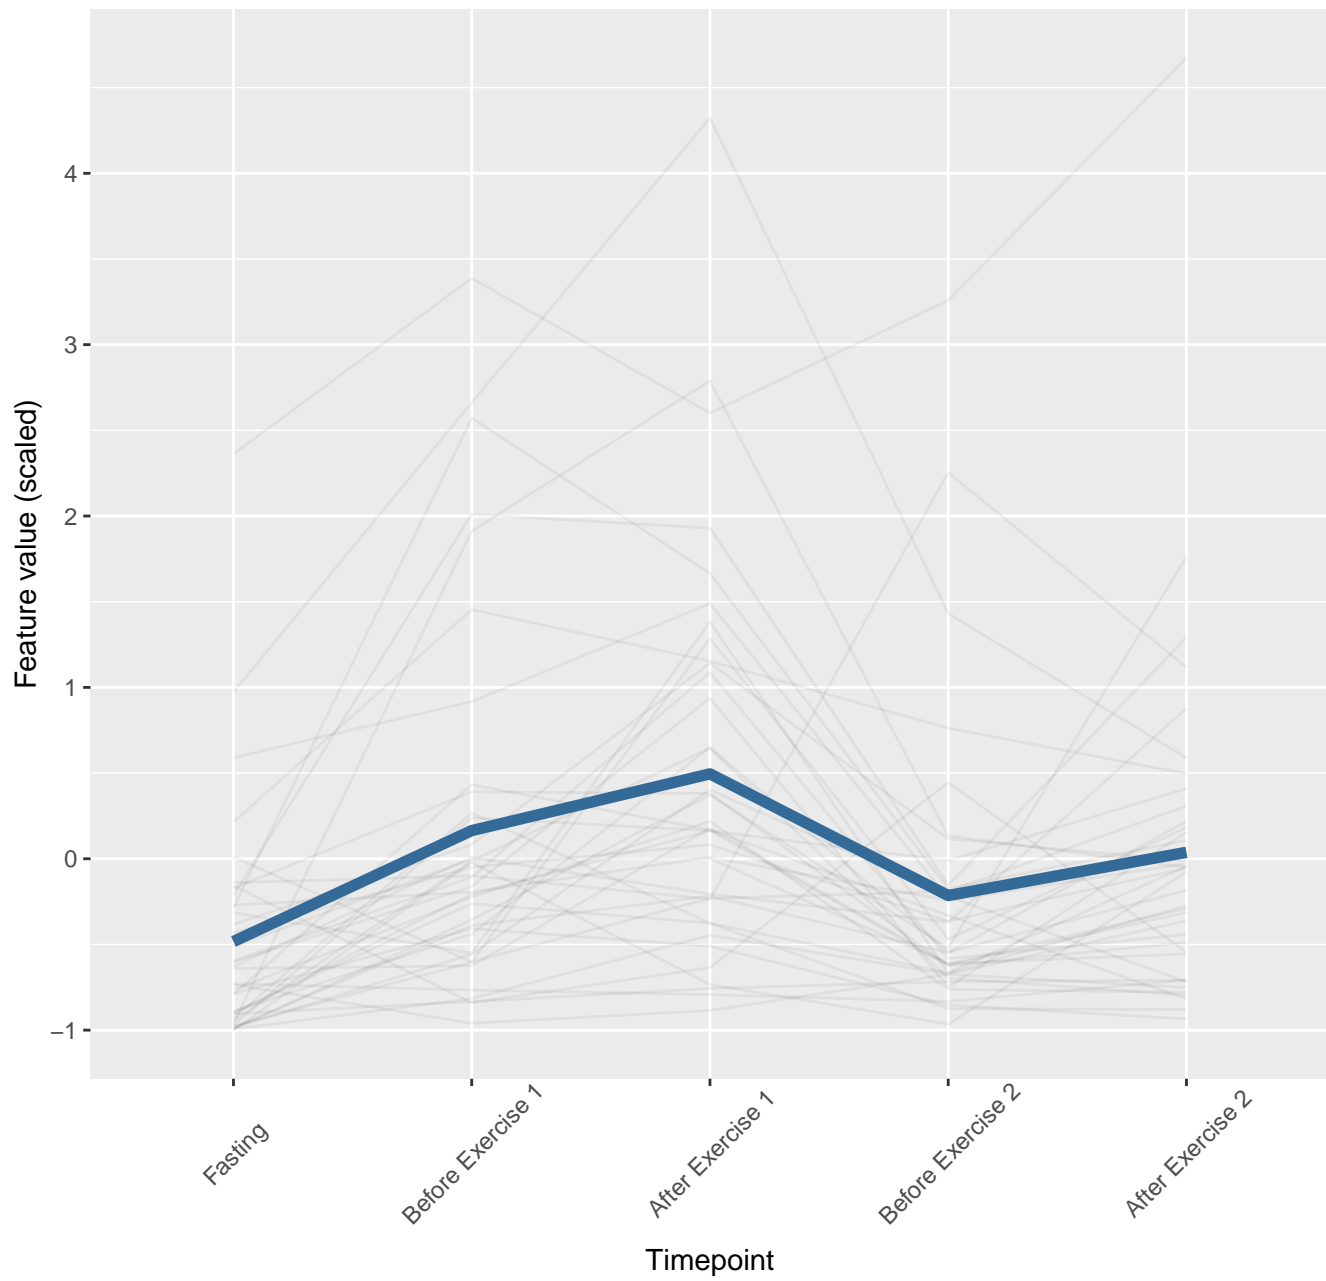

Line plot of TG(42:0)

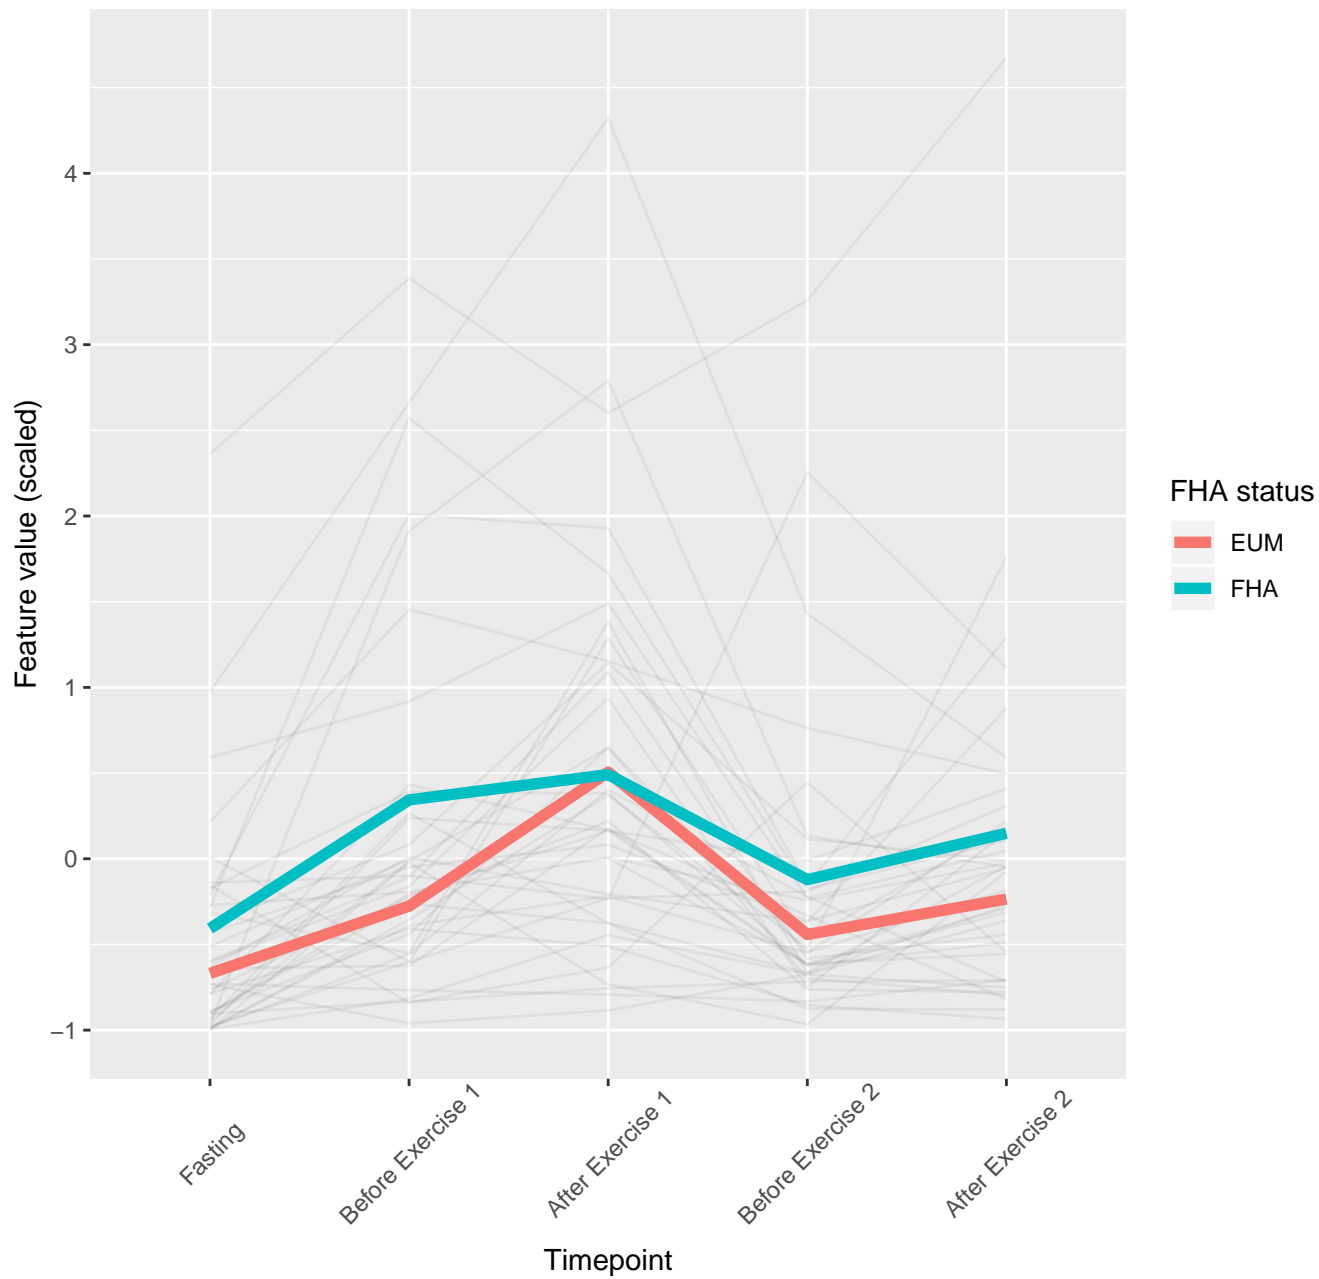

Line plot of TG(42:0)

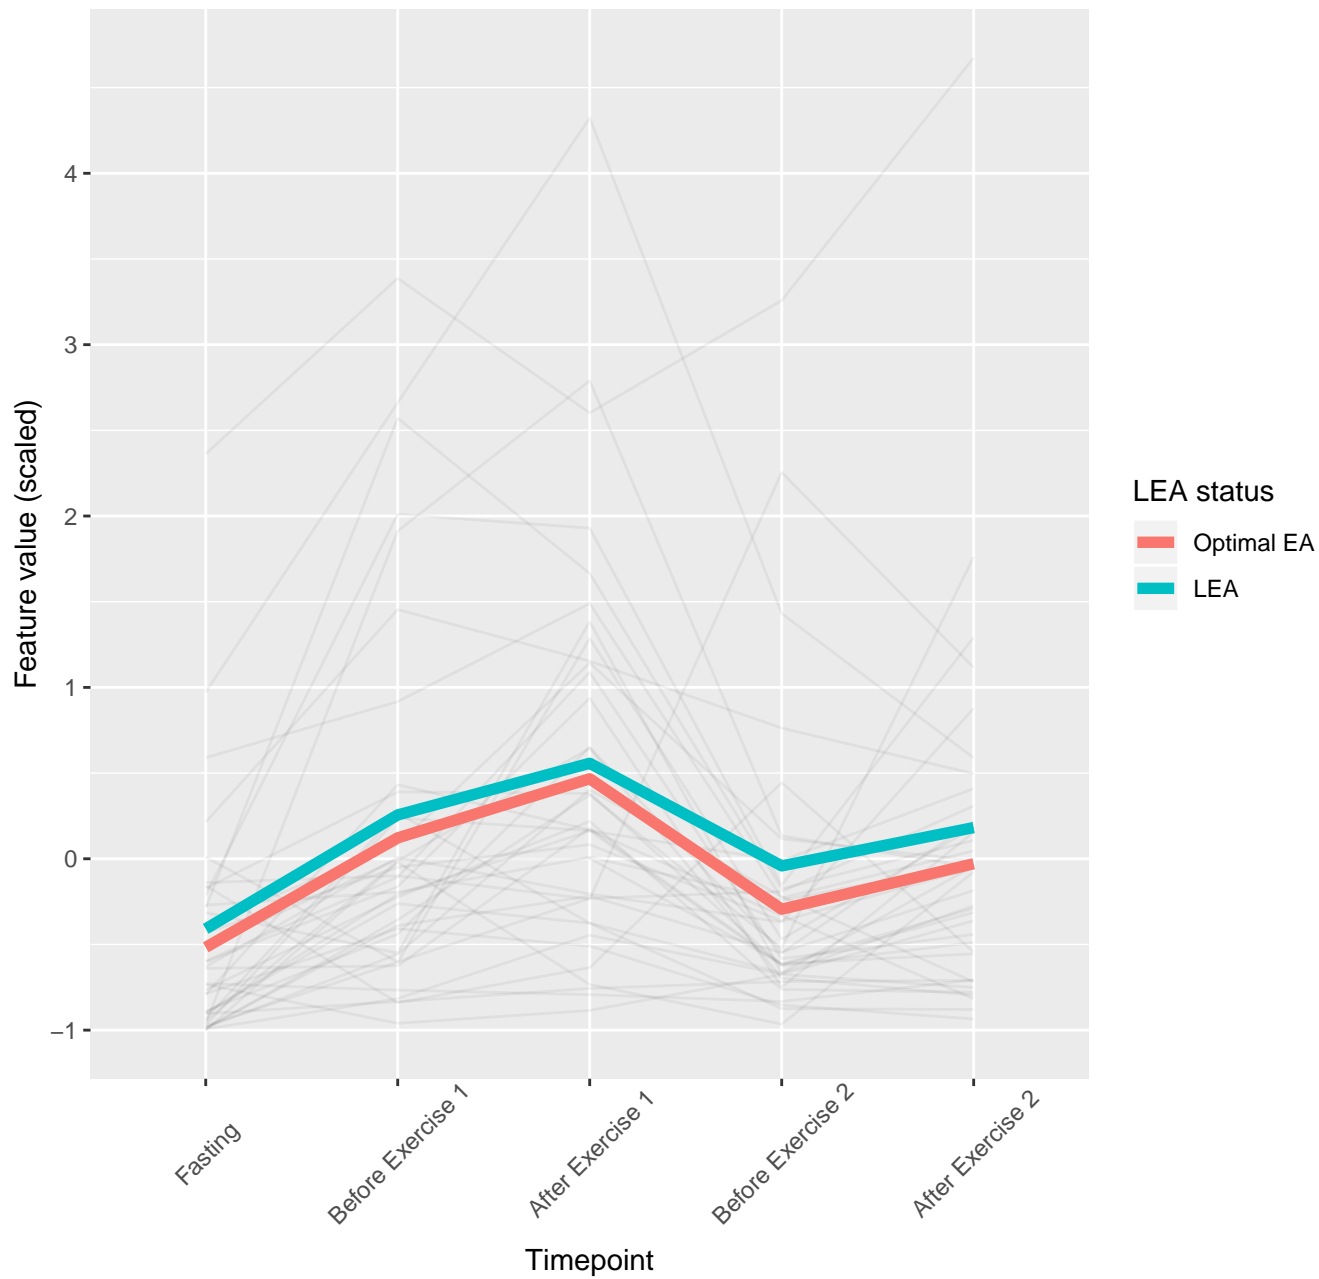



Line plot of TG(42:1)

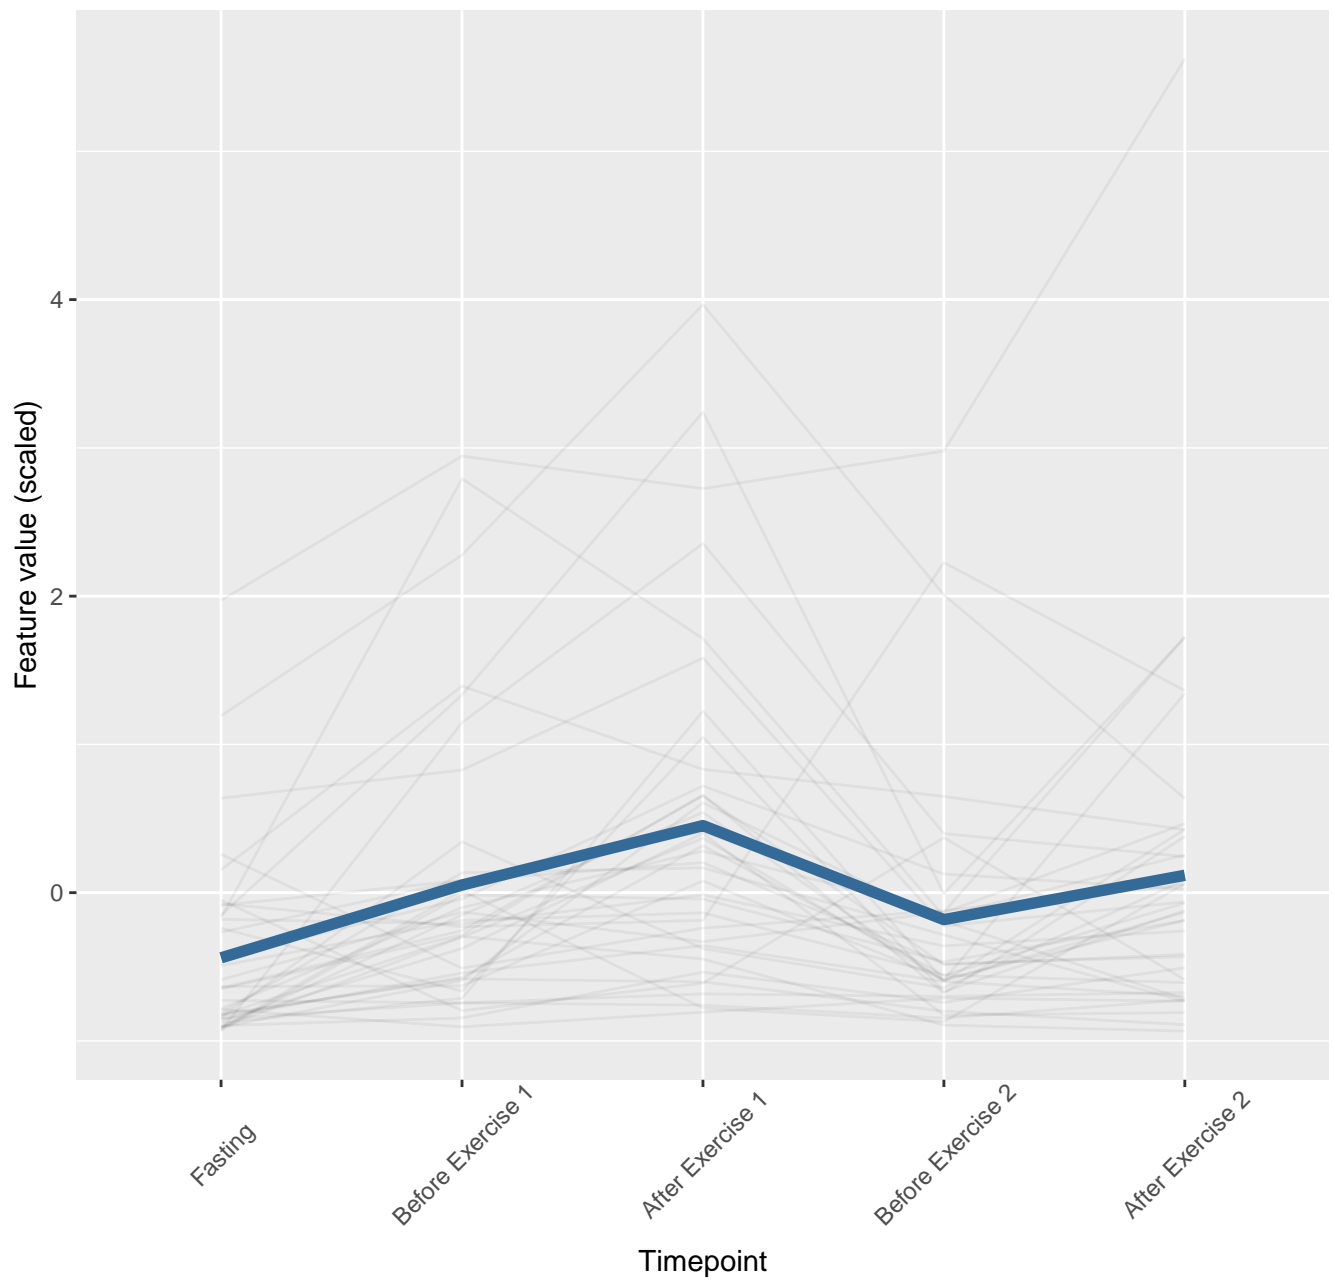

Line plot of TG(42:1)

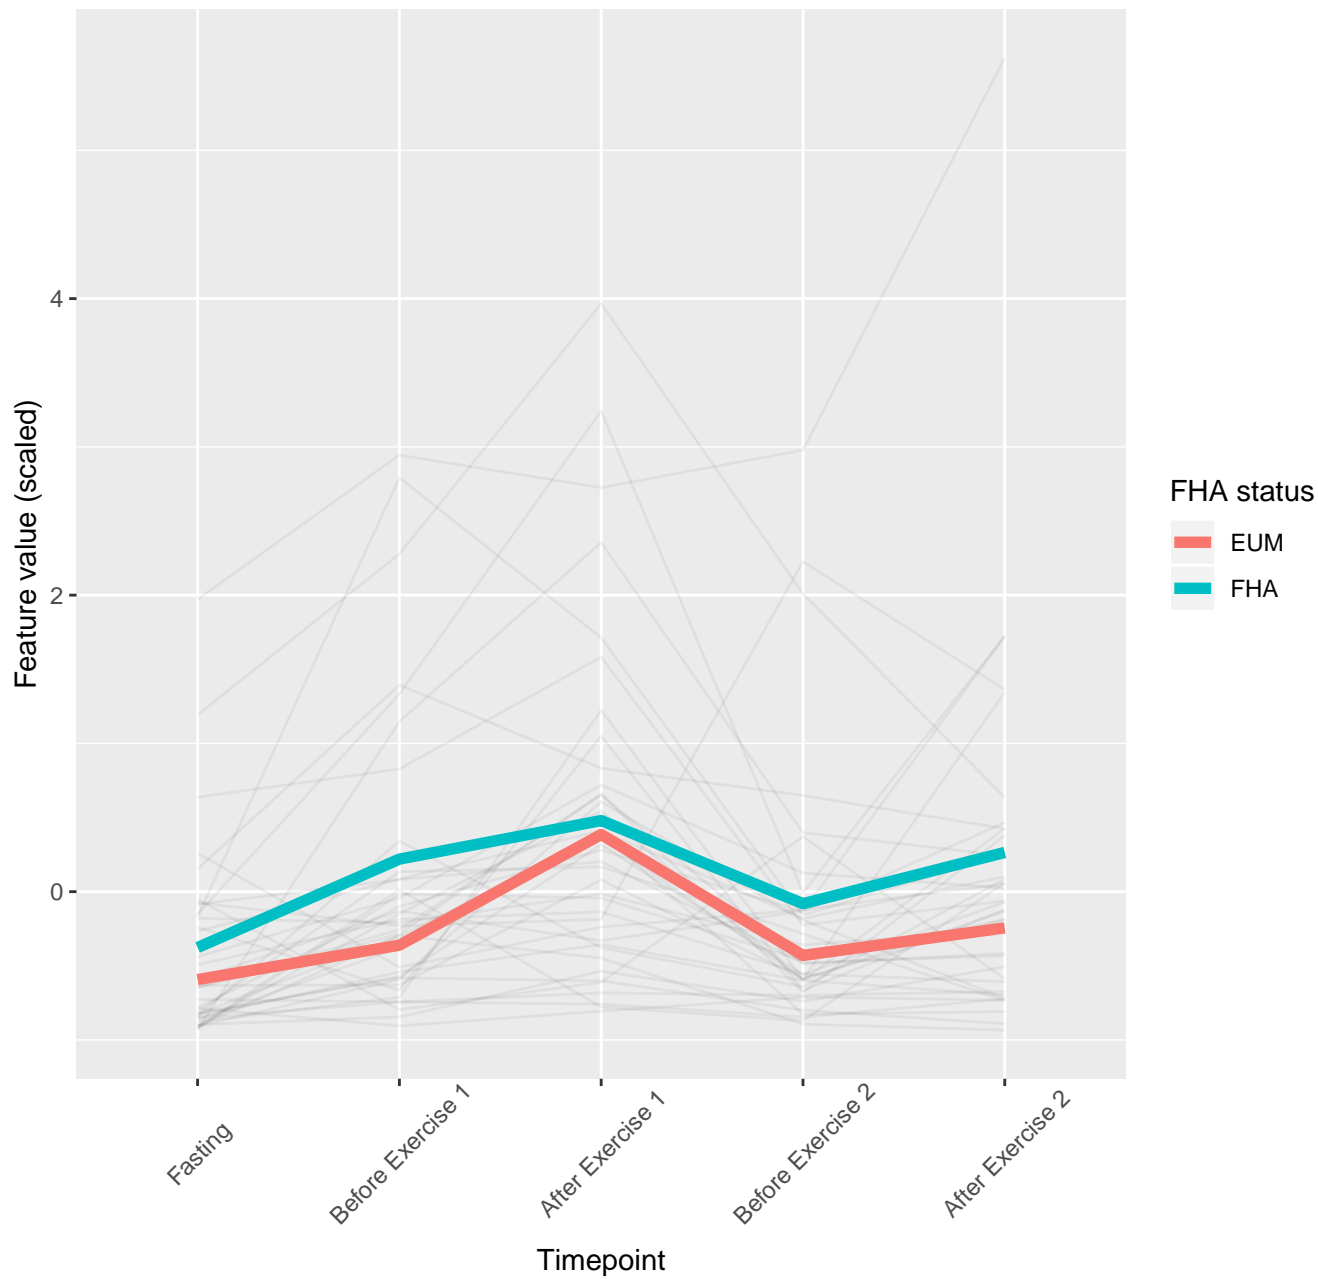

Line plot of TG(42:1)

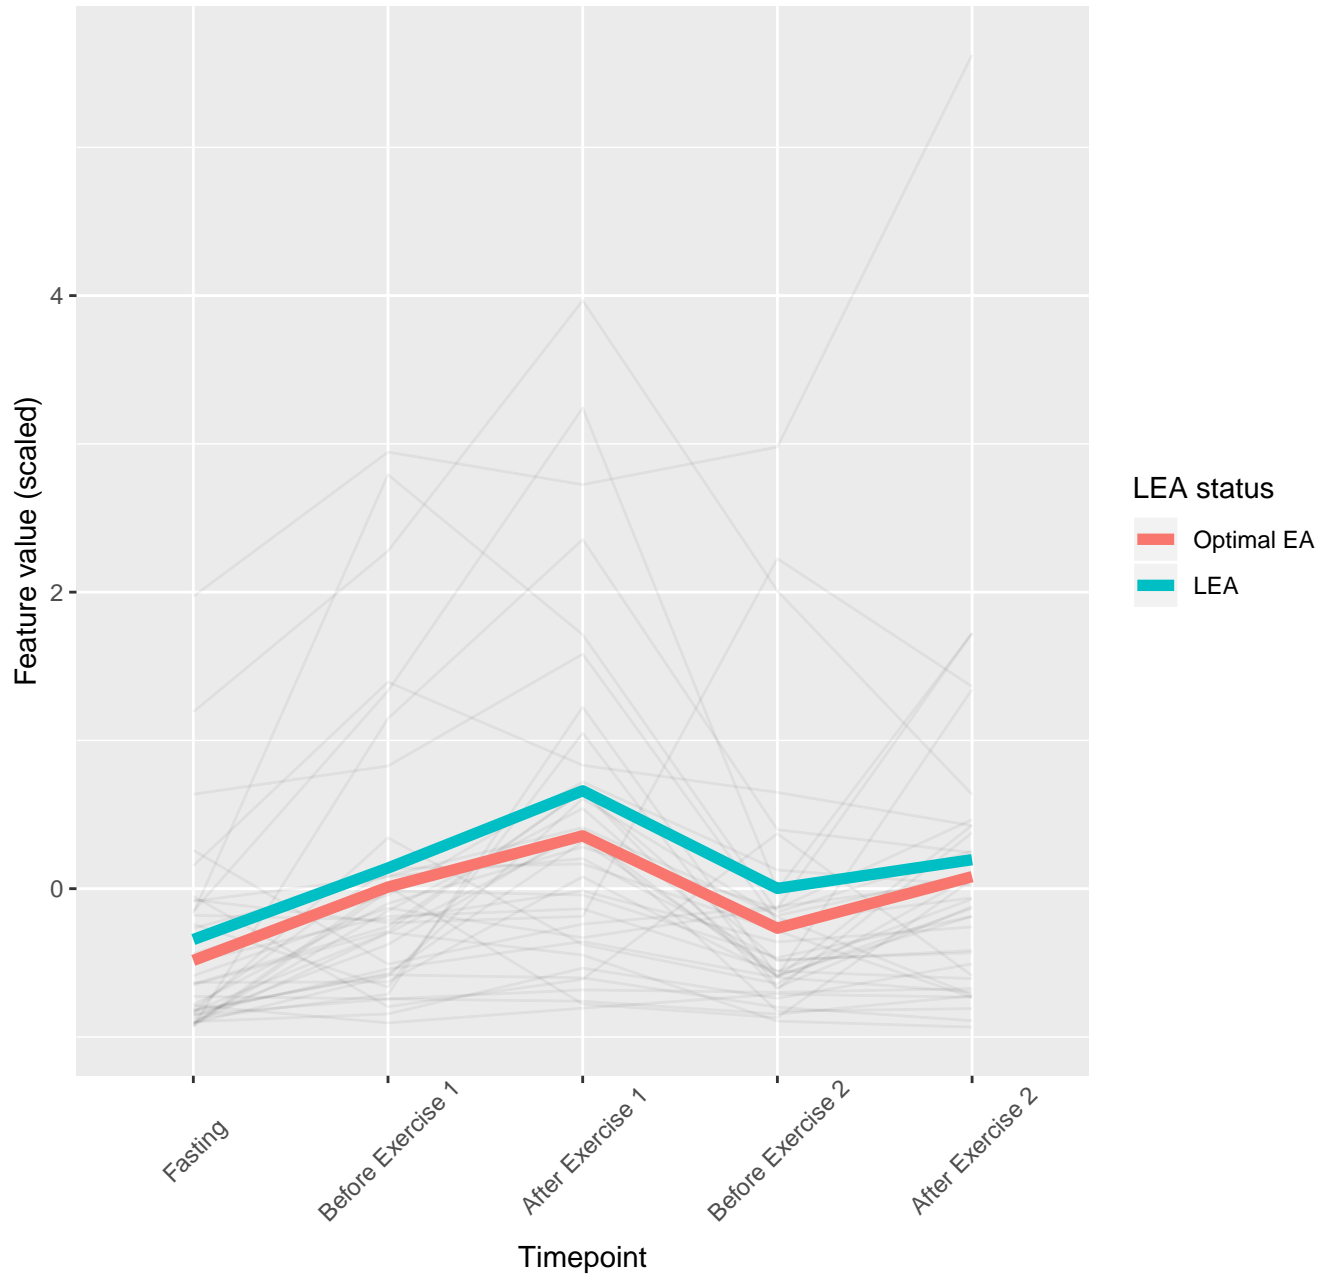

Line plot of TG(42:2)

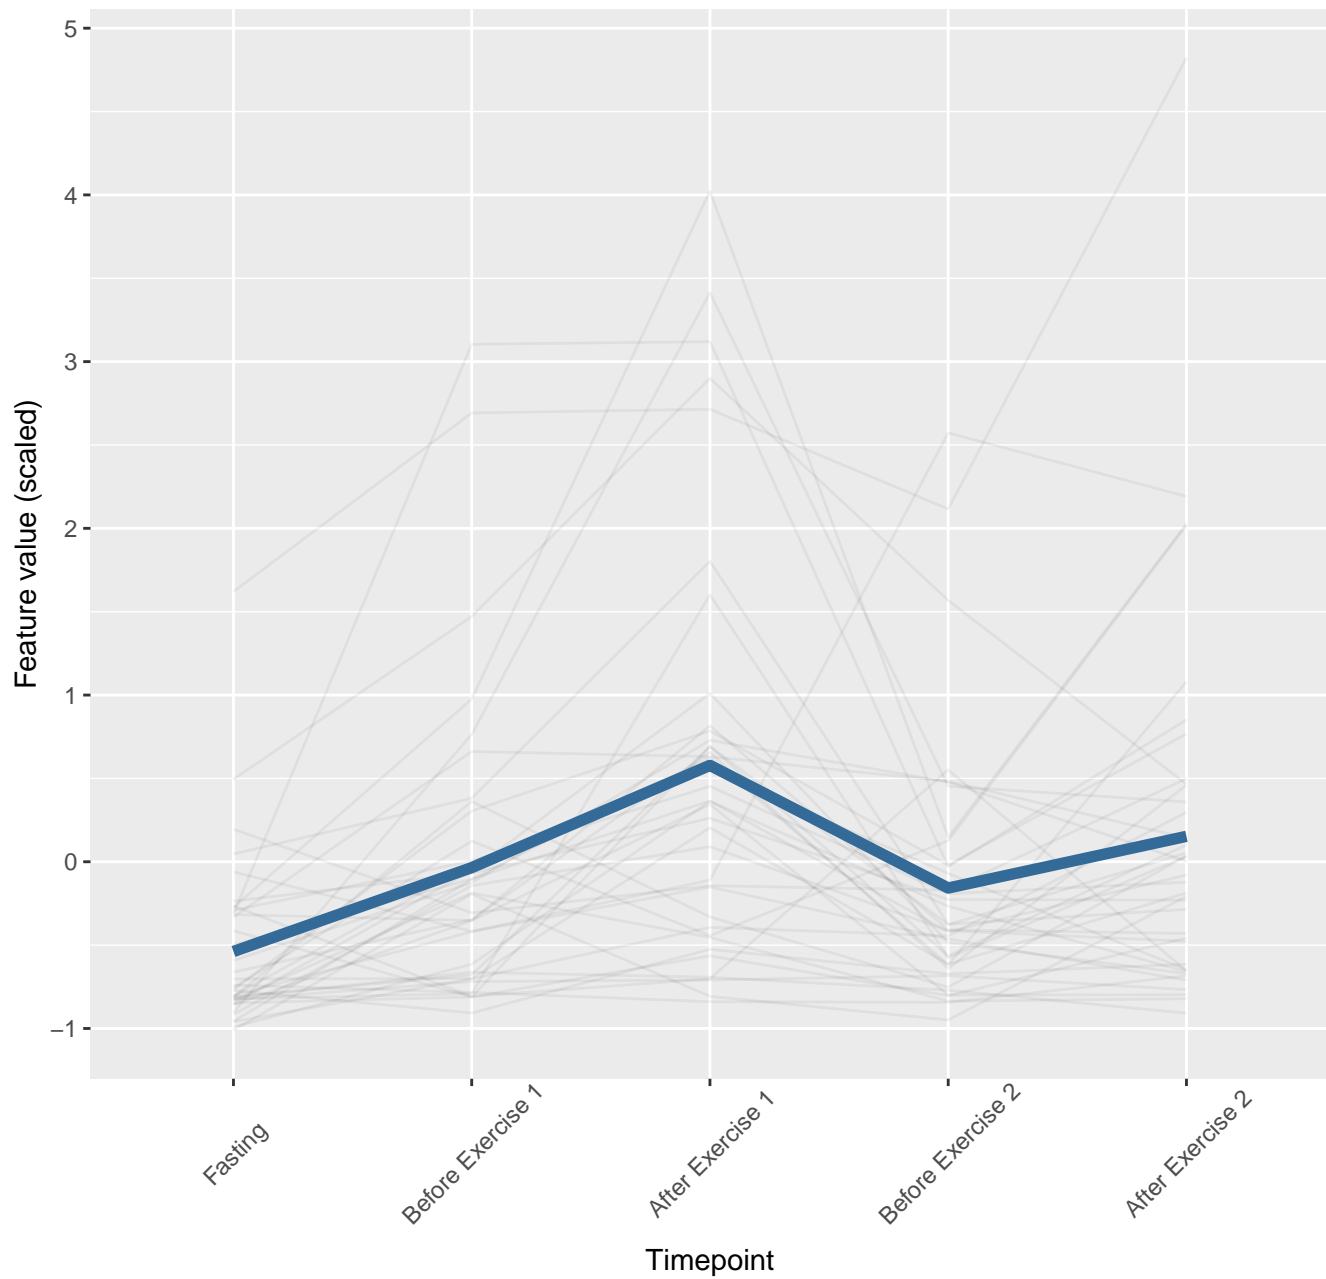

Line plot of TG(42:2)

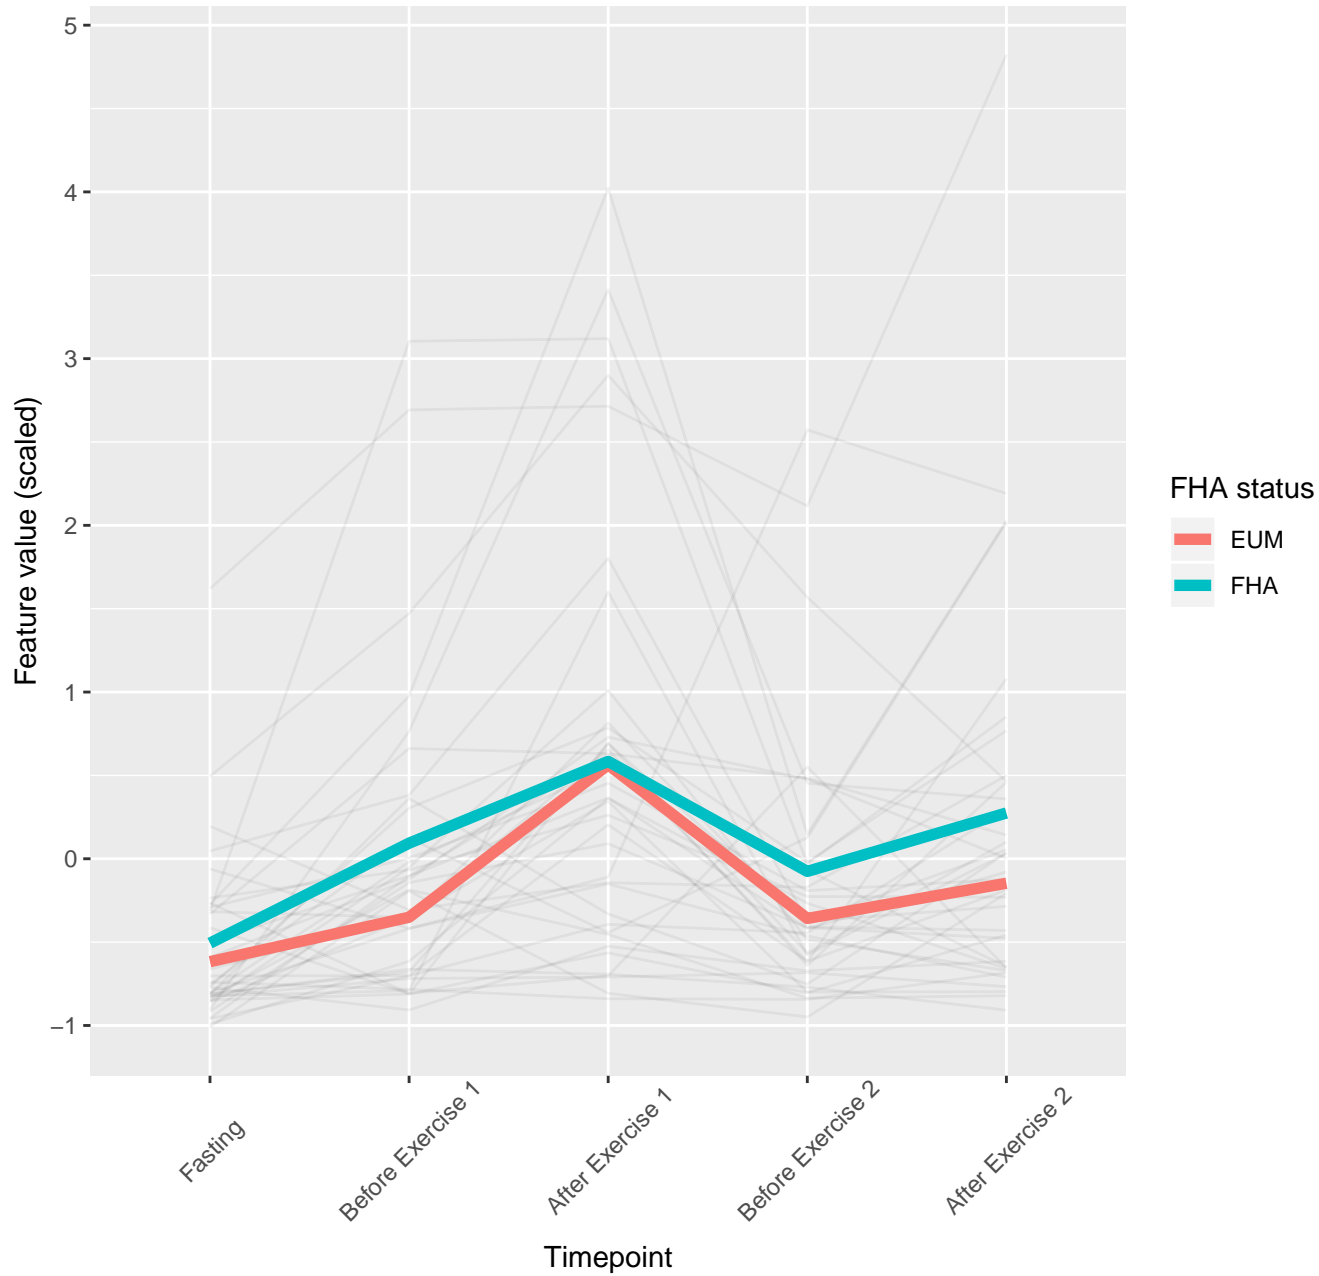

Line plot of TG(42:2)

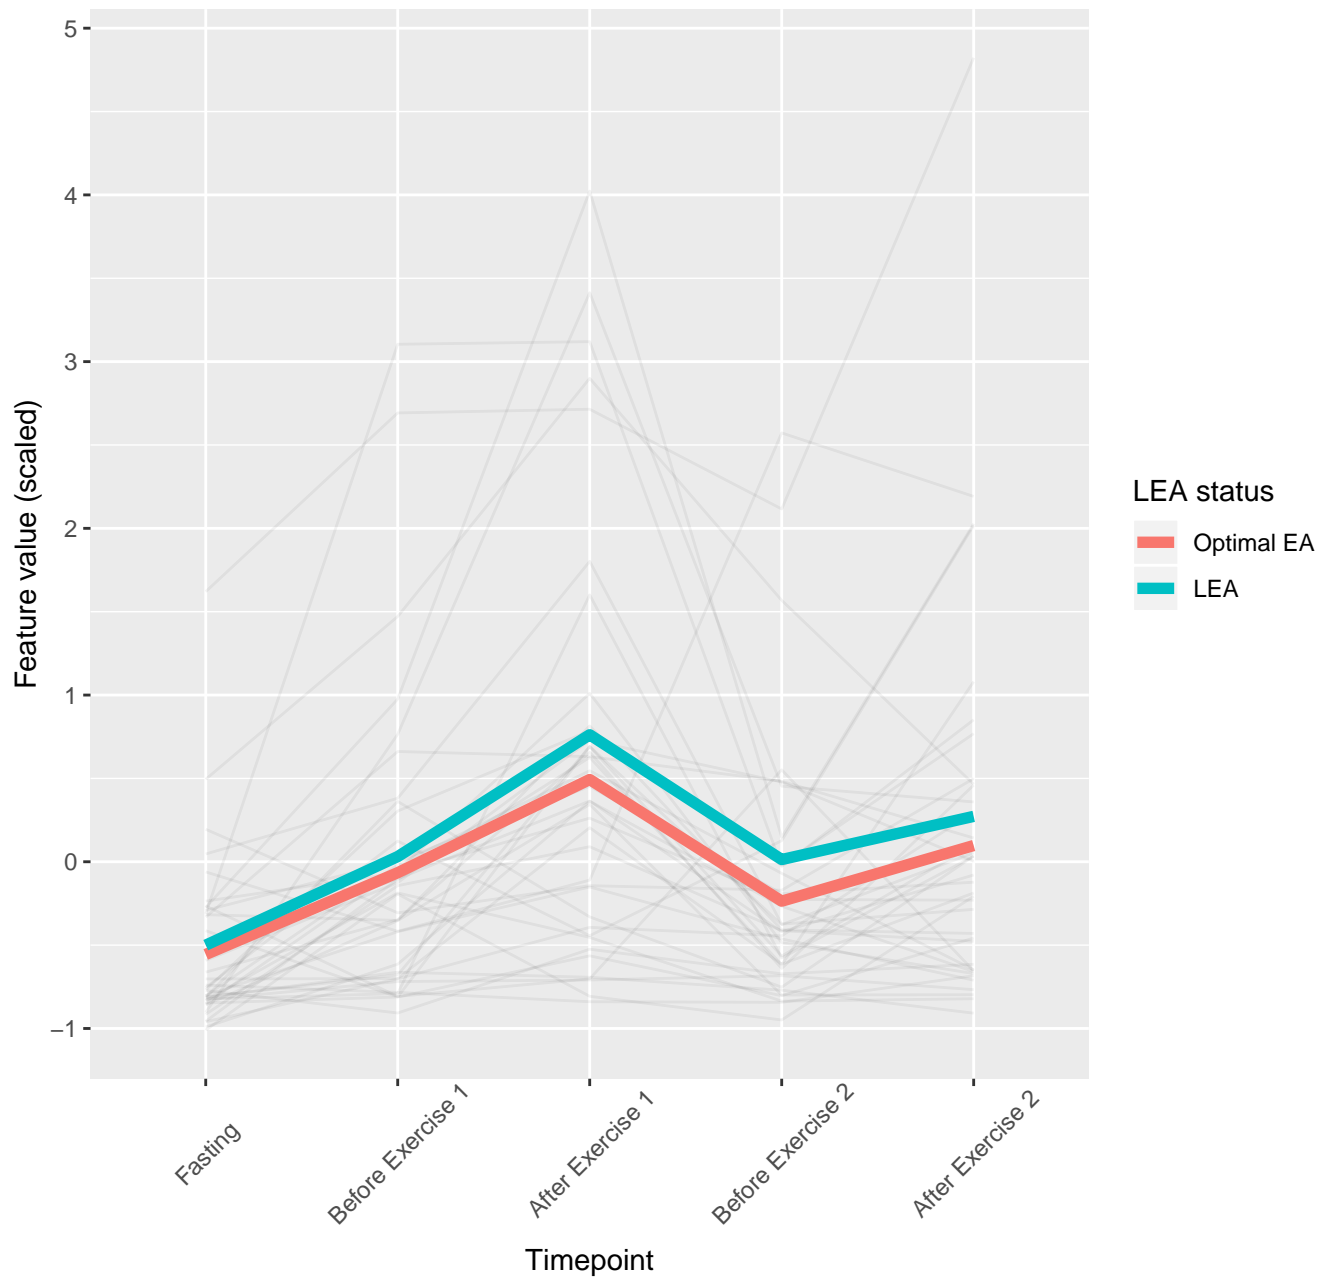

Line plot of TG(44:1)

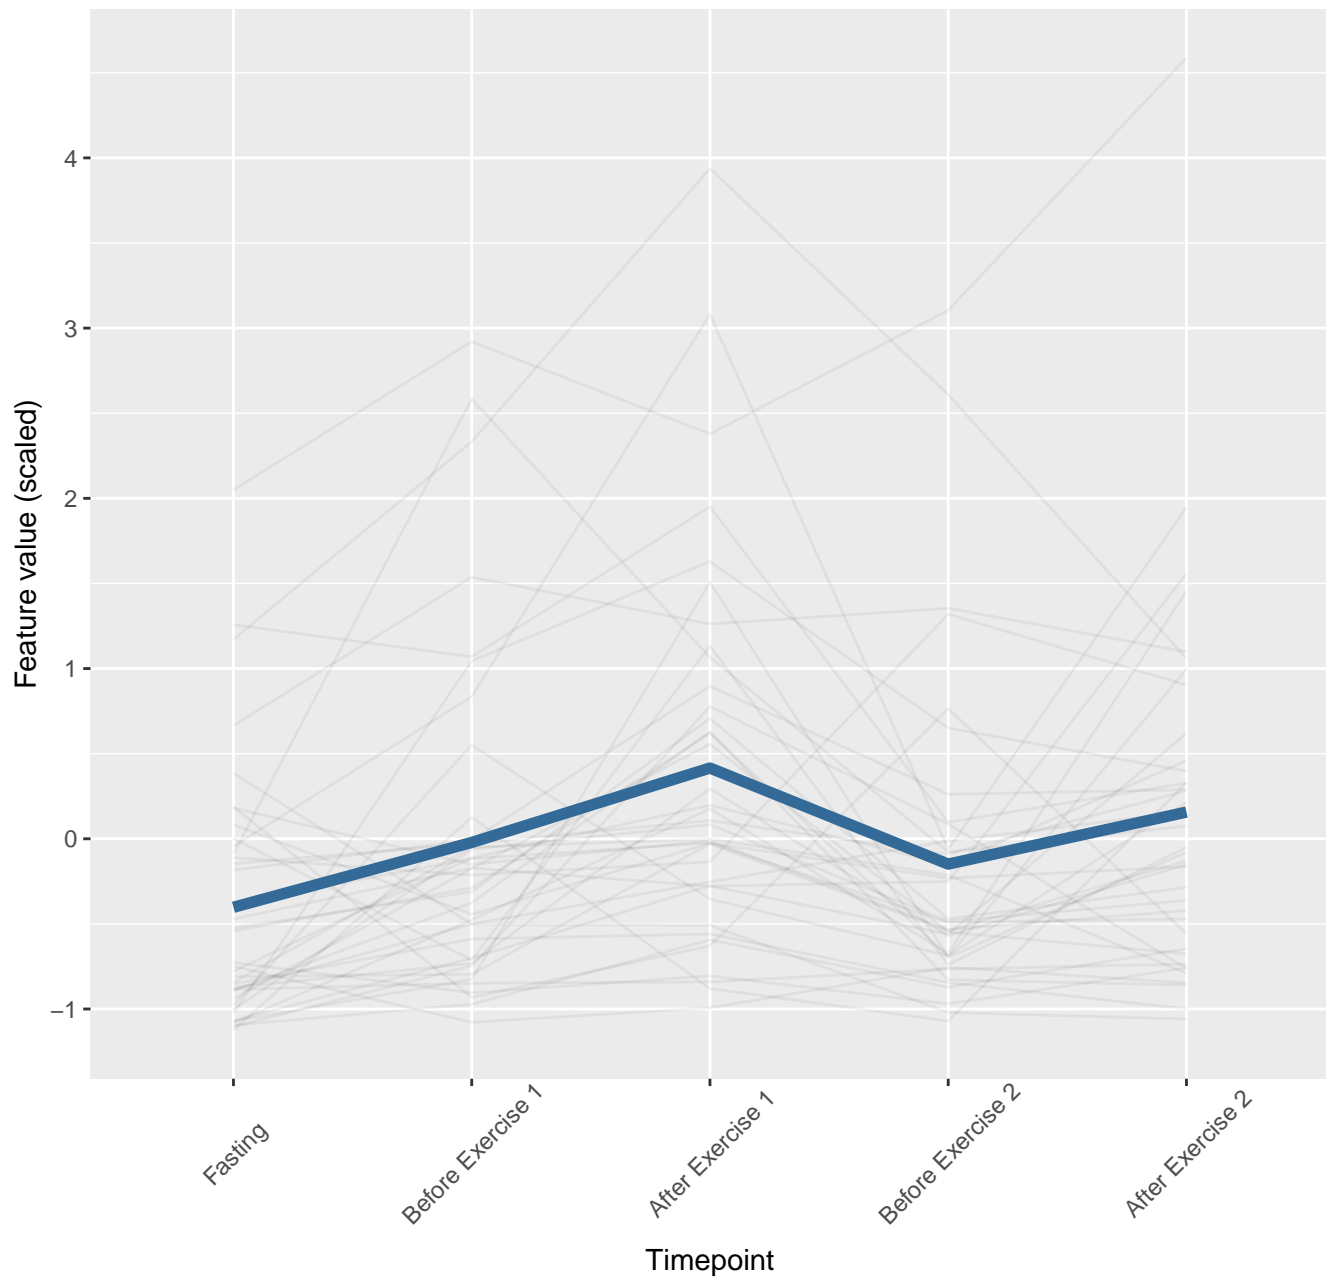

Line plot of TG(44:1)

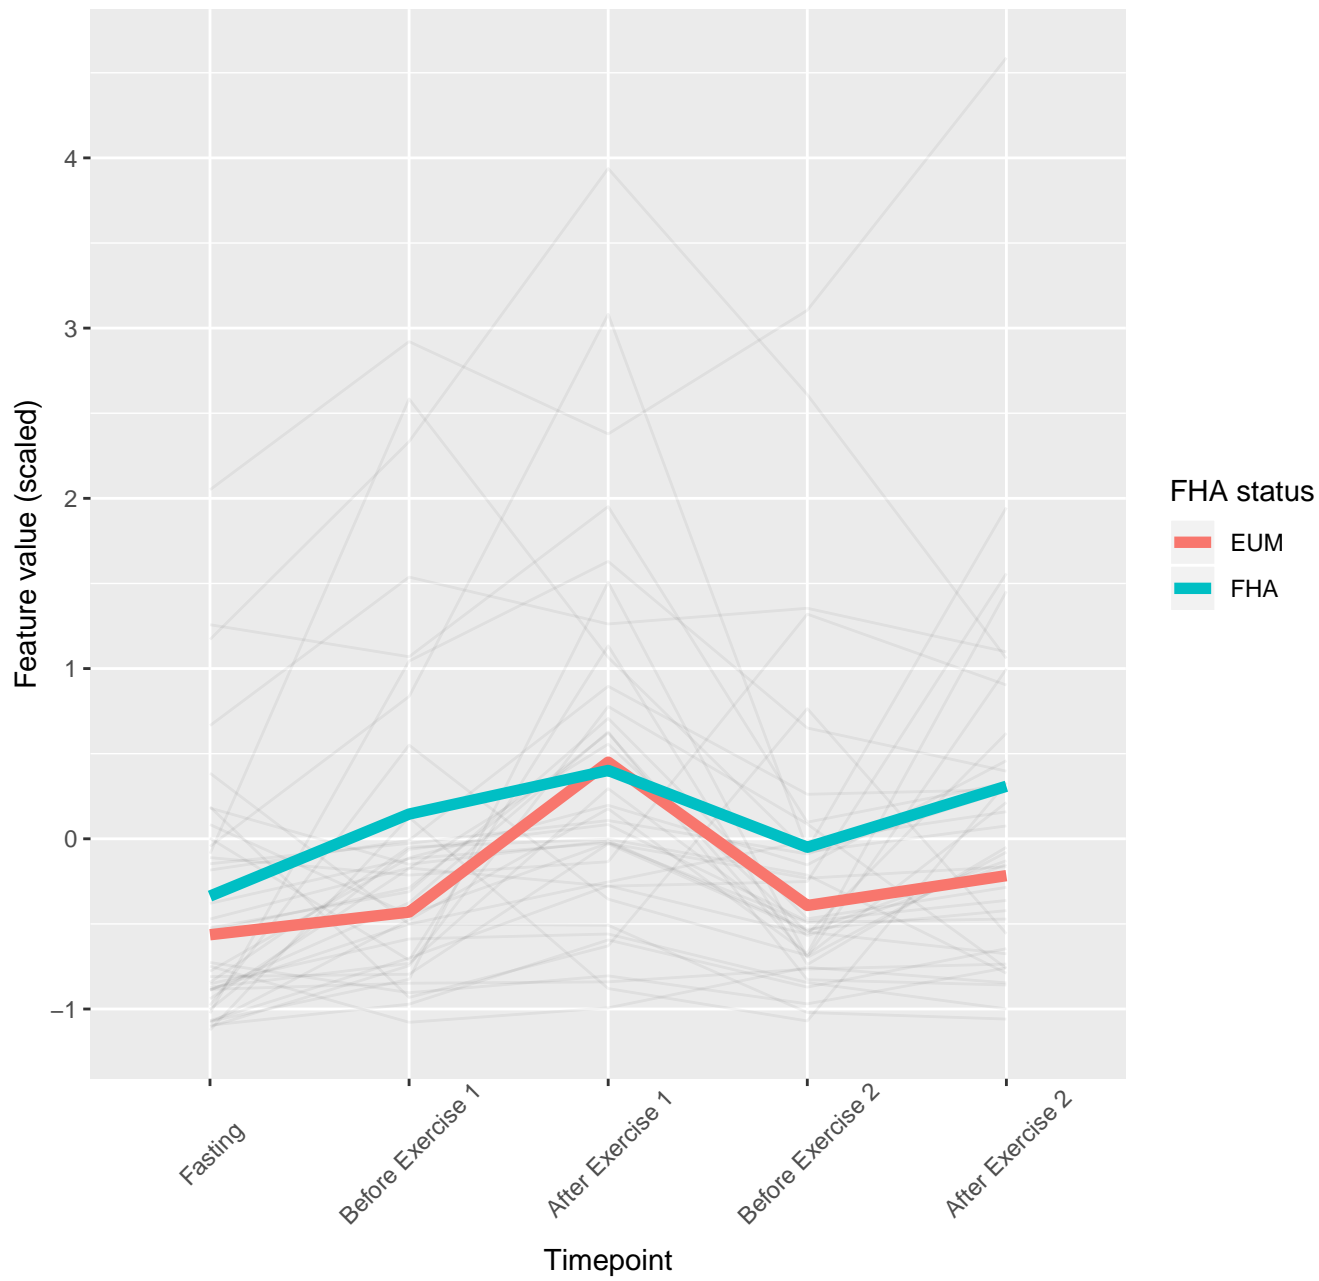



Line plot of TG(44:1)

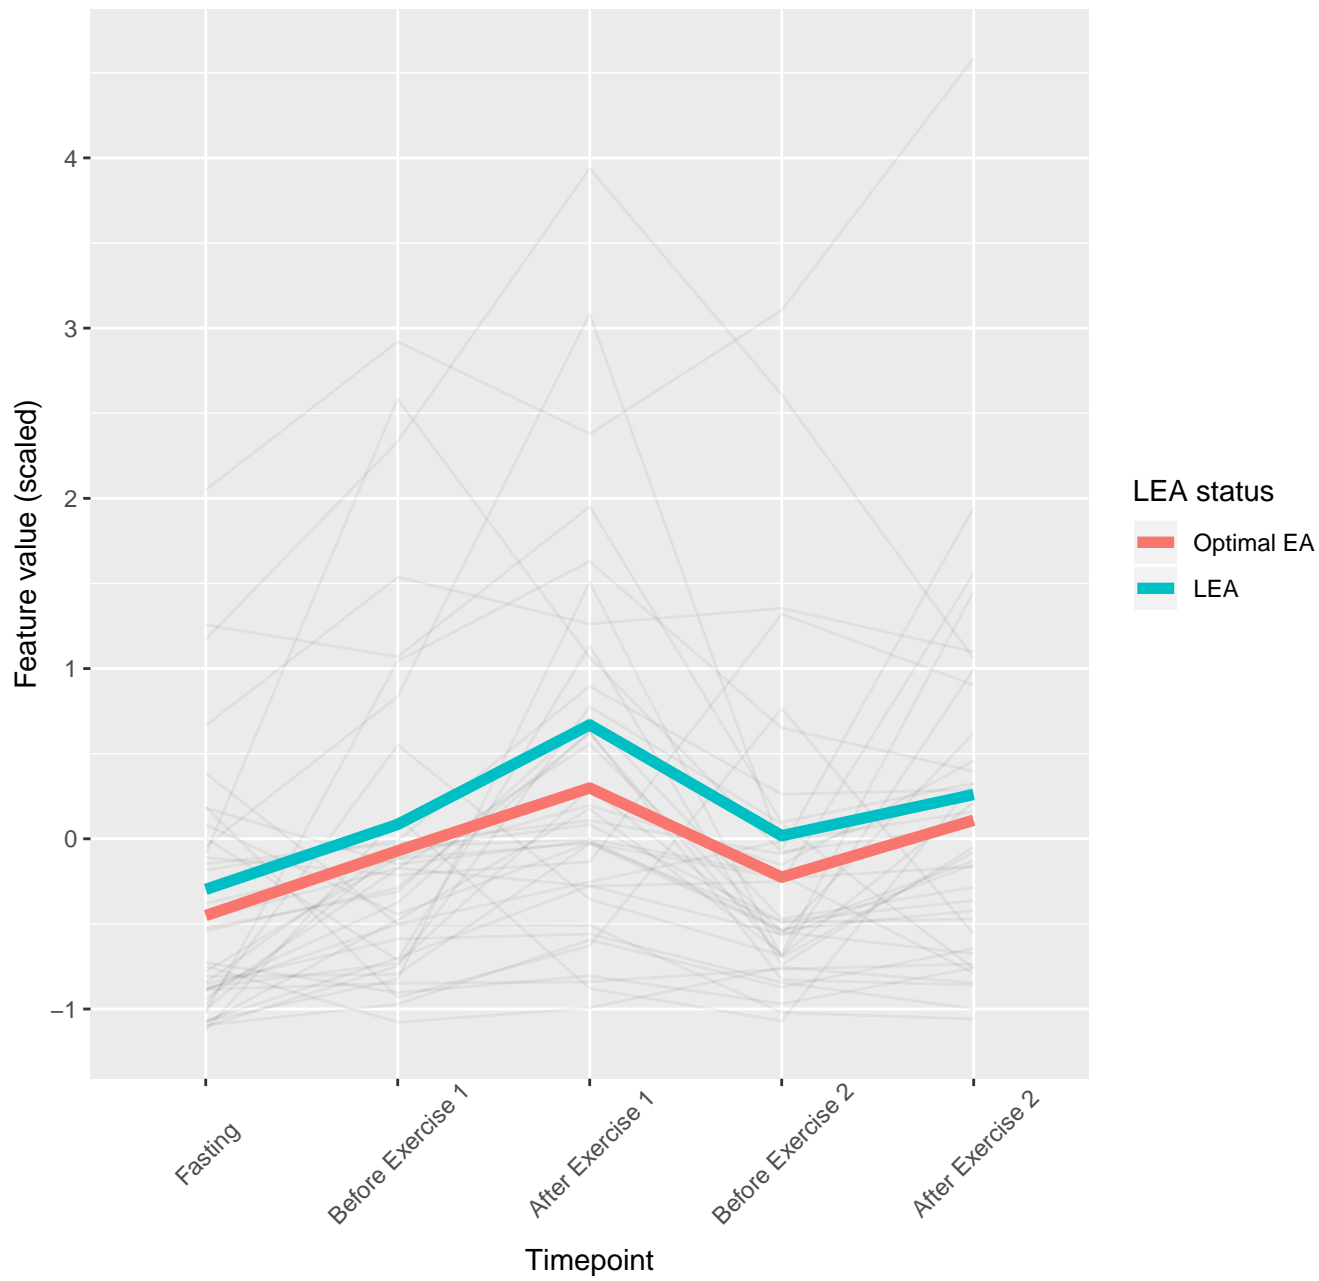

Line plot of TG(44:2)

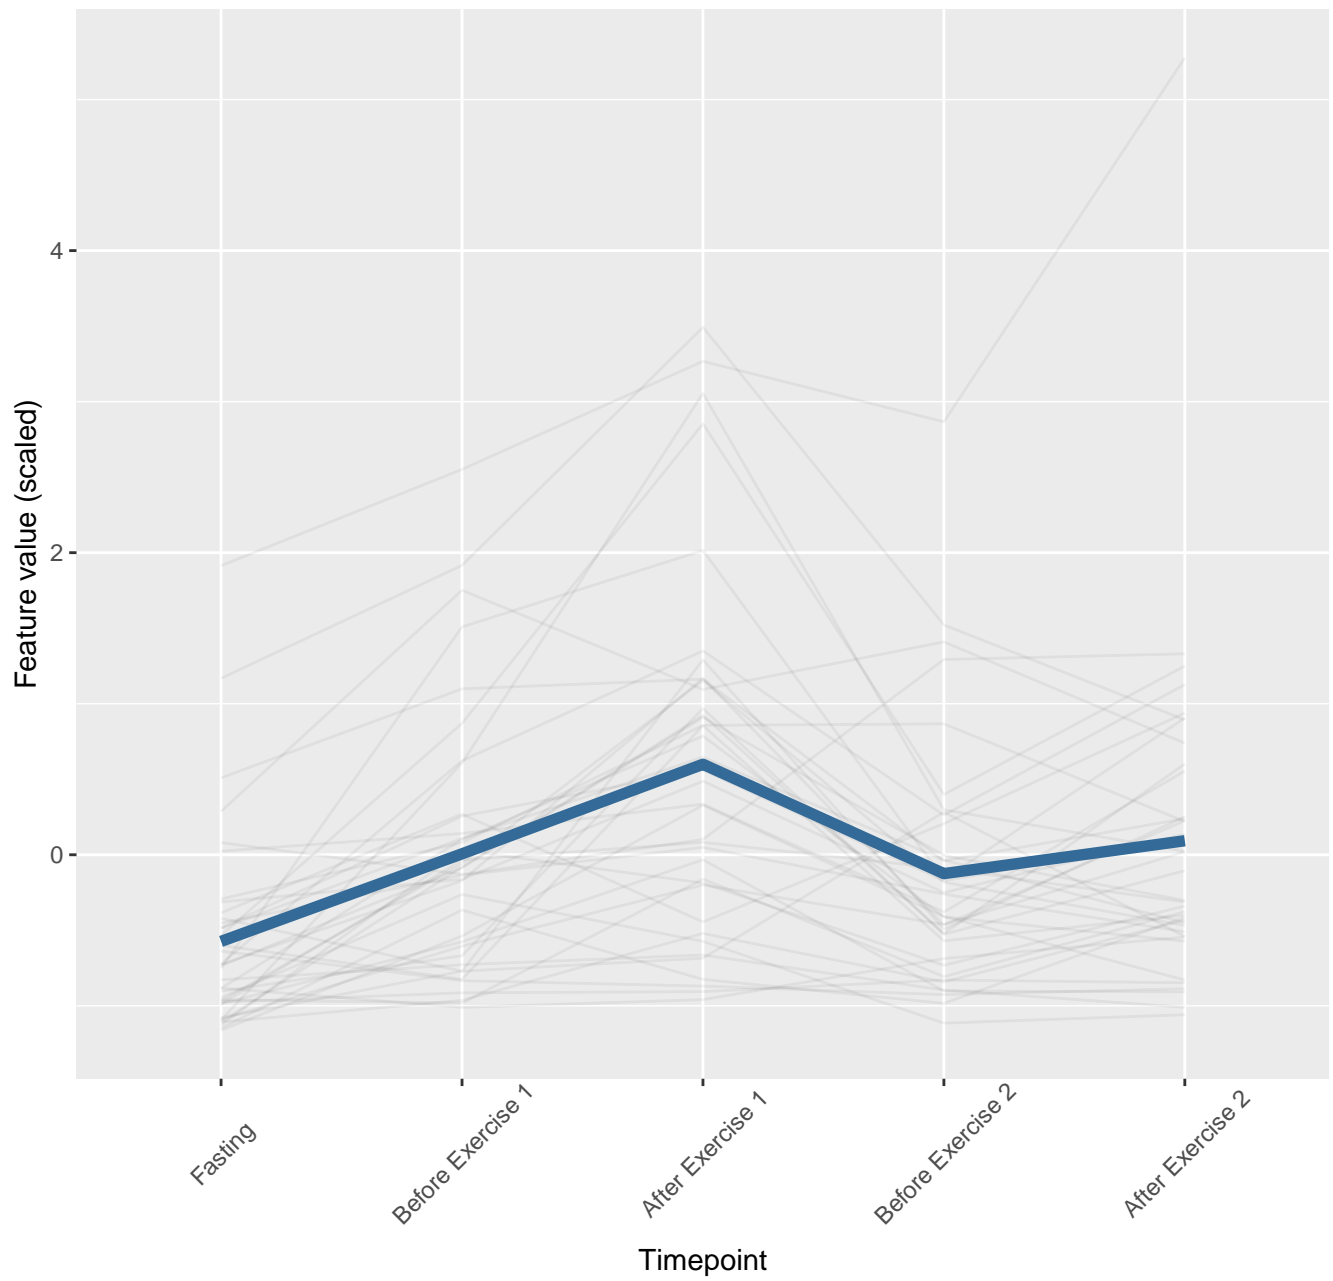

Line plot of TG(44:2)

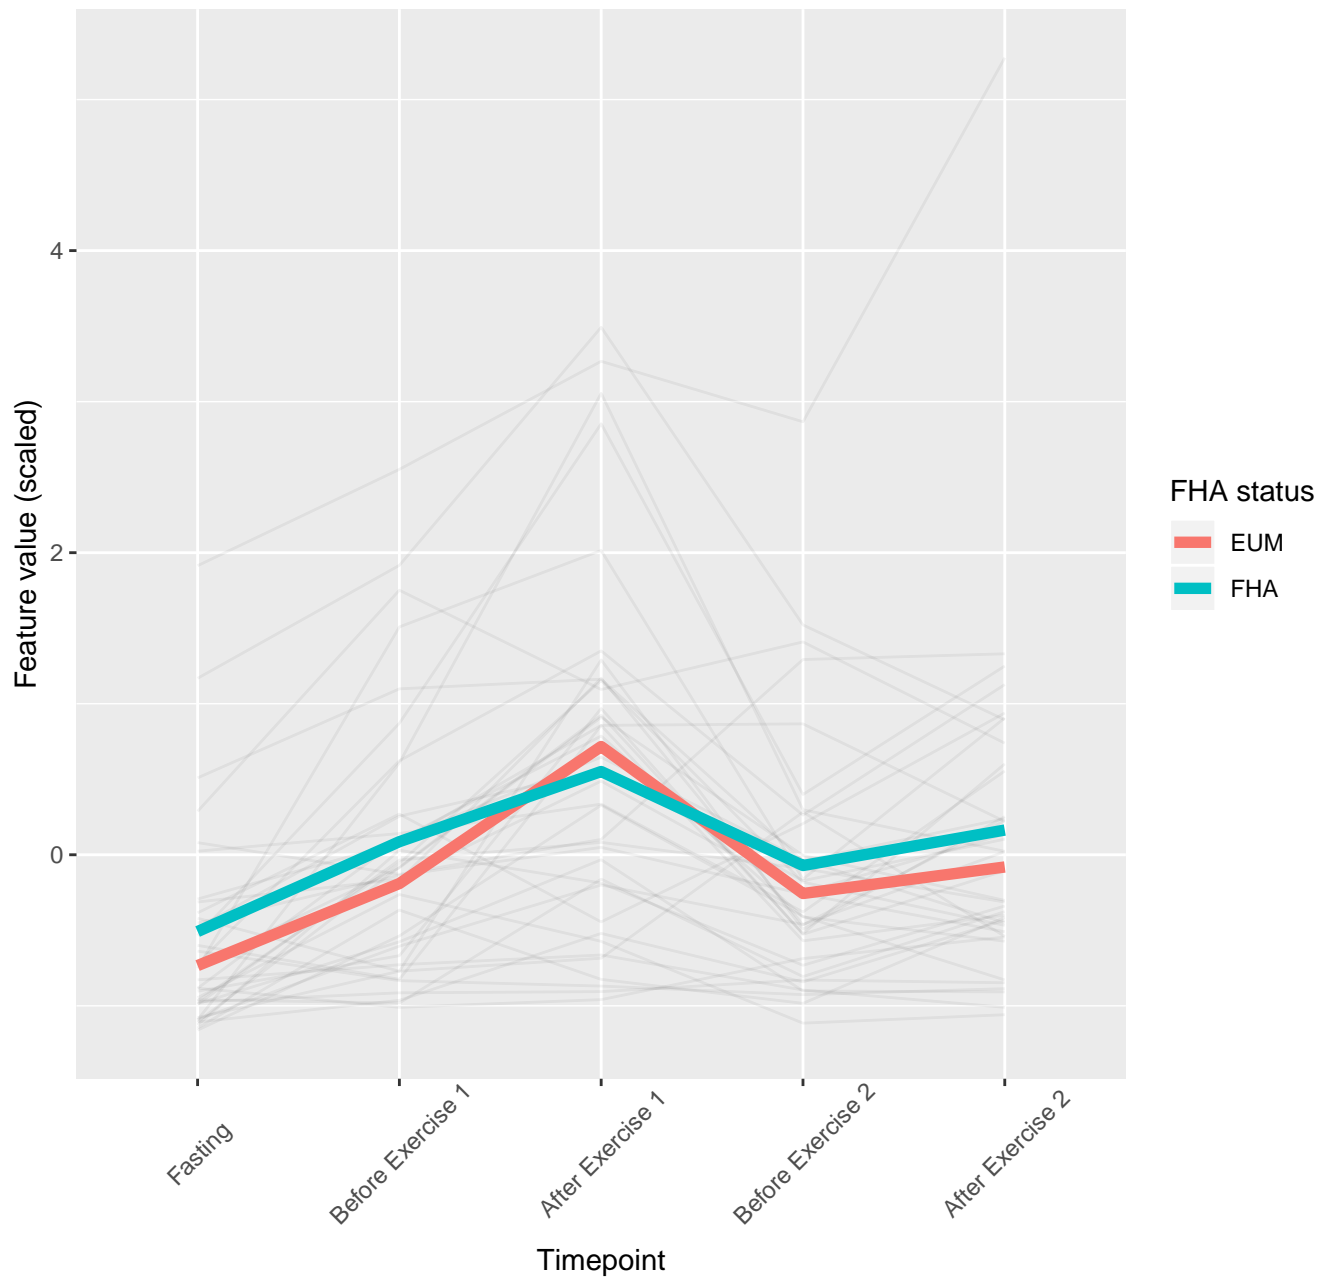

Line plot of TG(44:2)

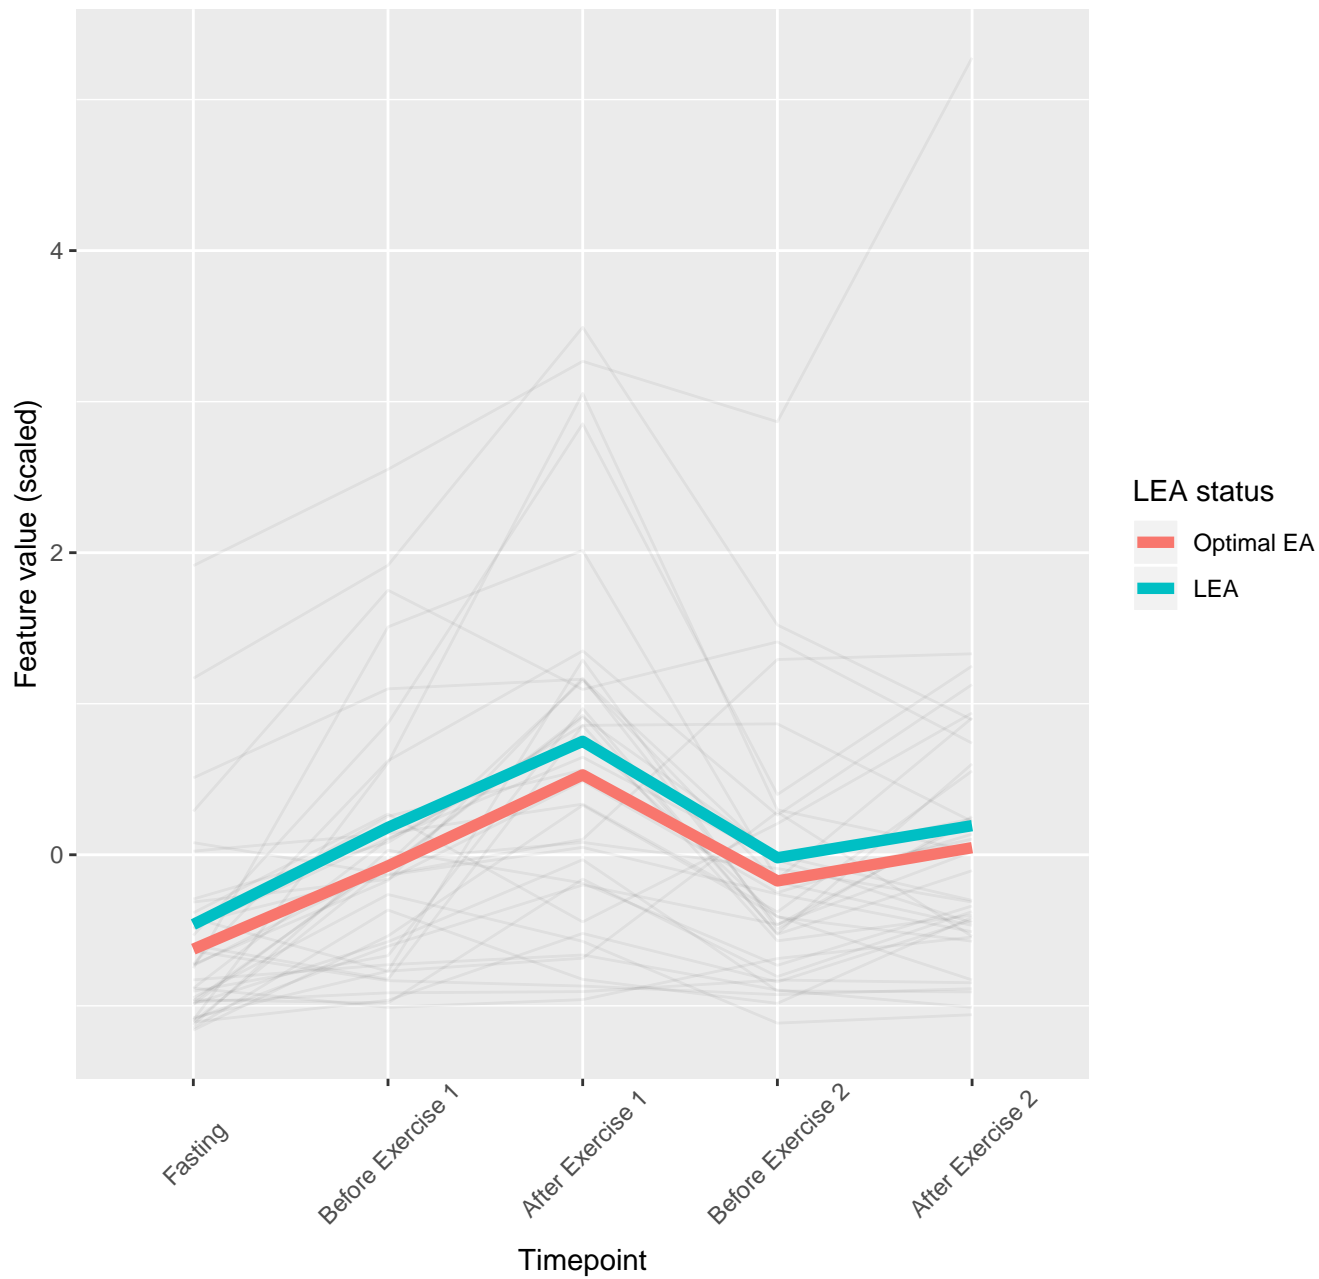

Line plot of TG(45:0)

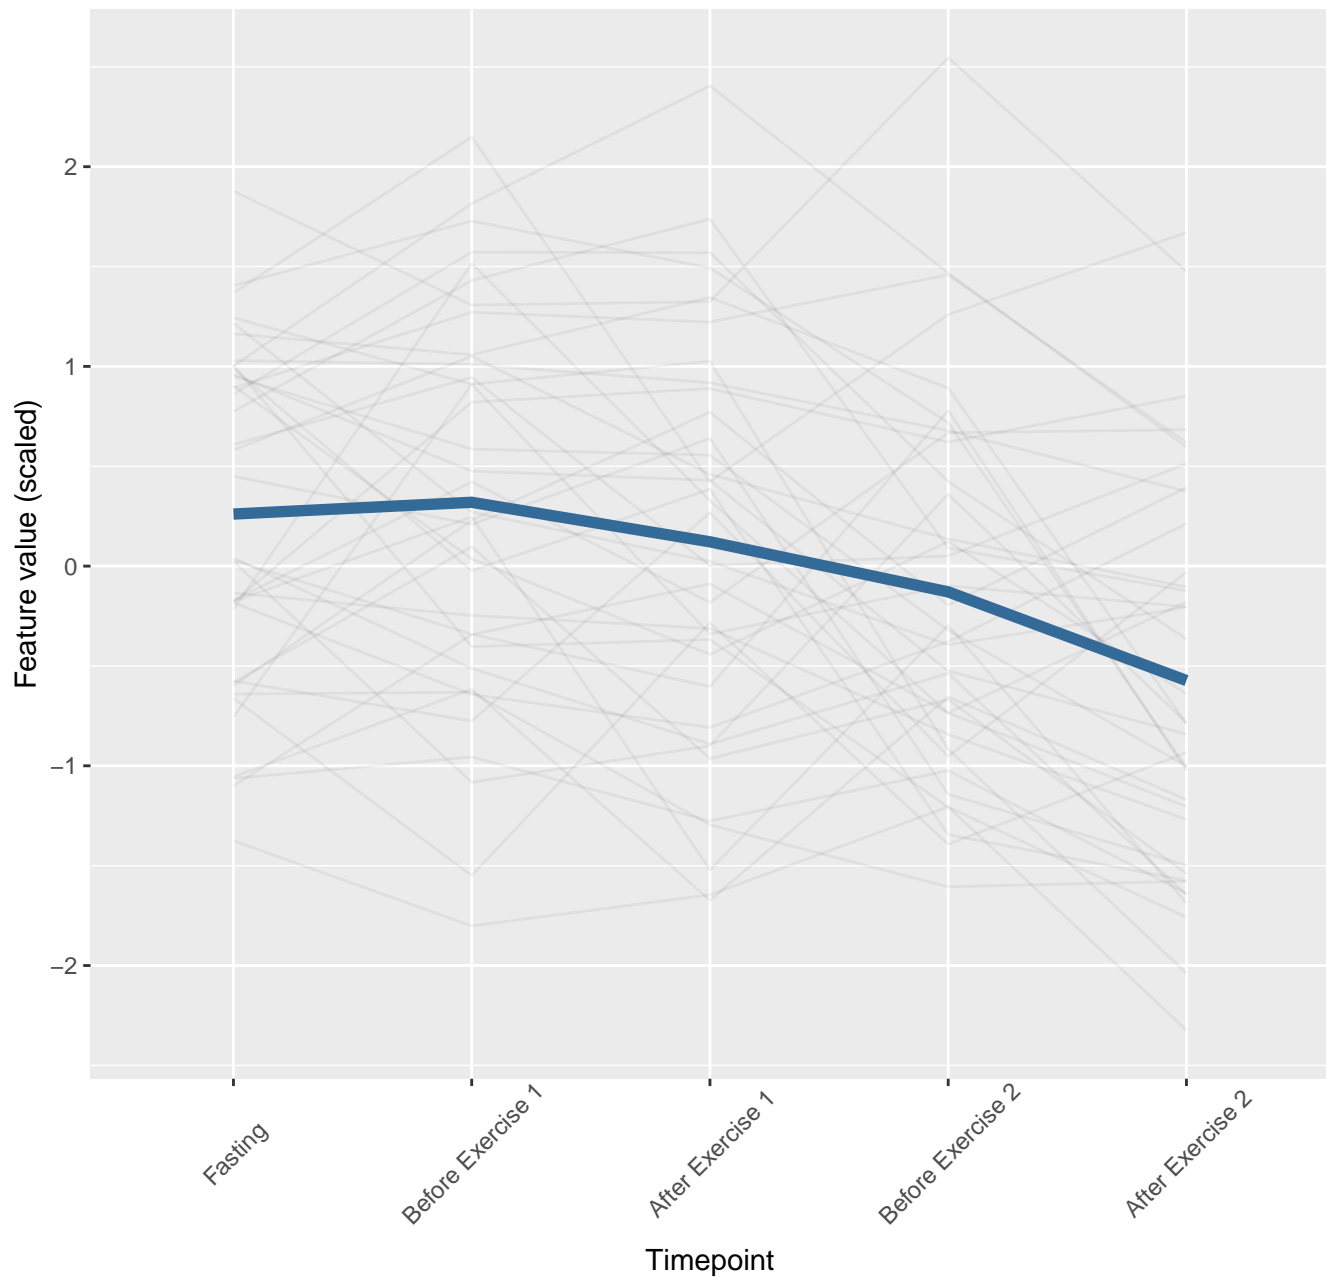

Line plot of TG(45:0)

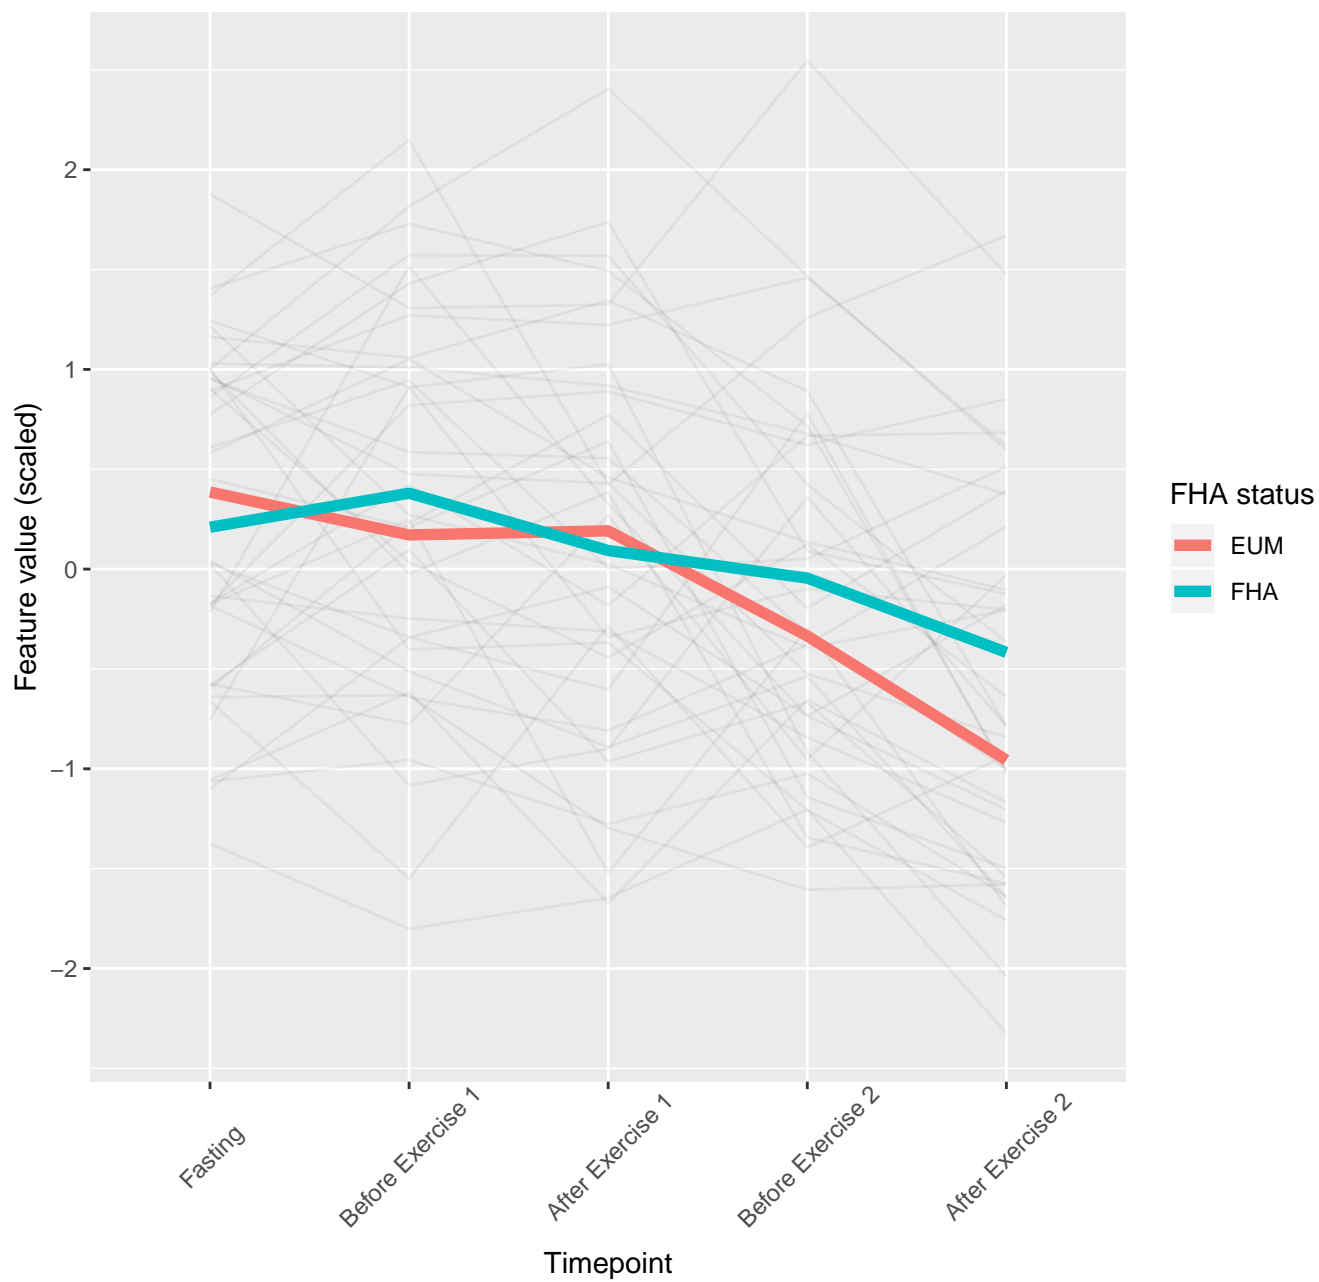

Line plot of TG(45:0)

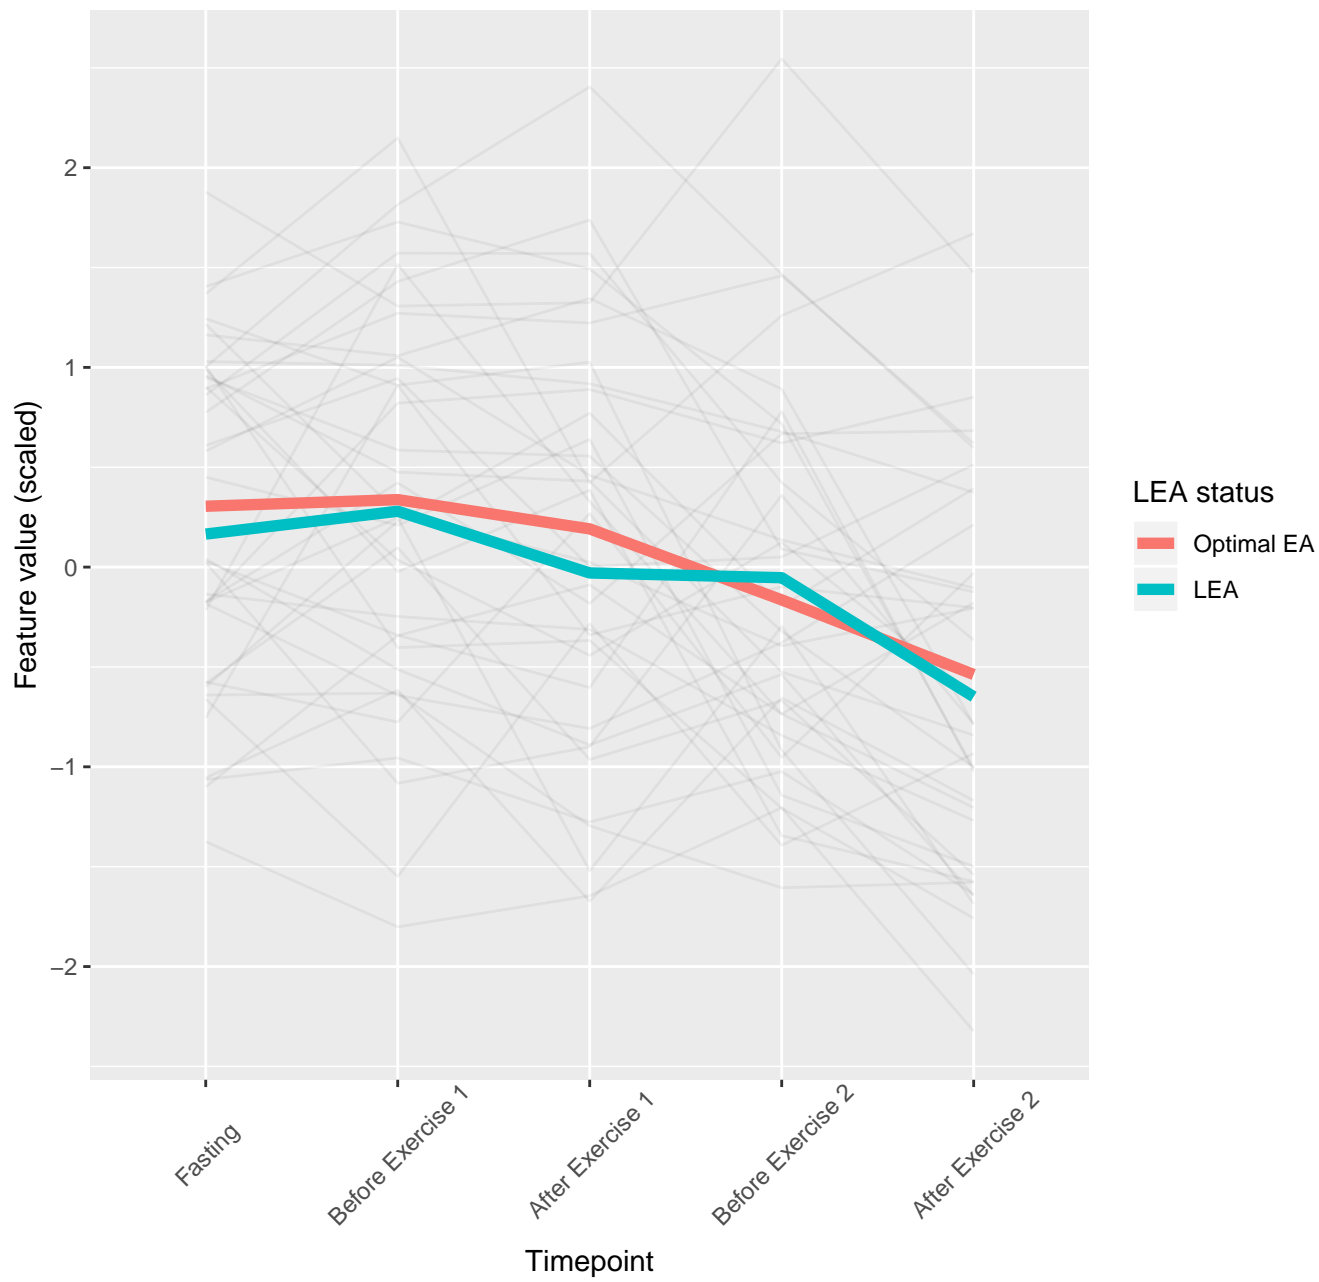

Line plot of TG(46:0)

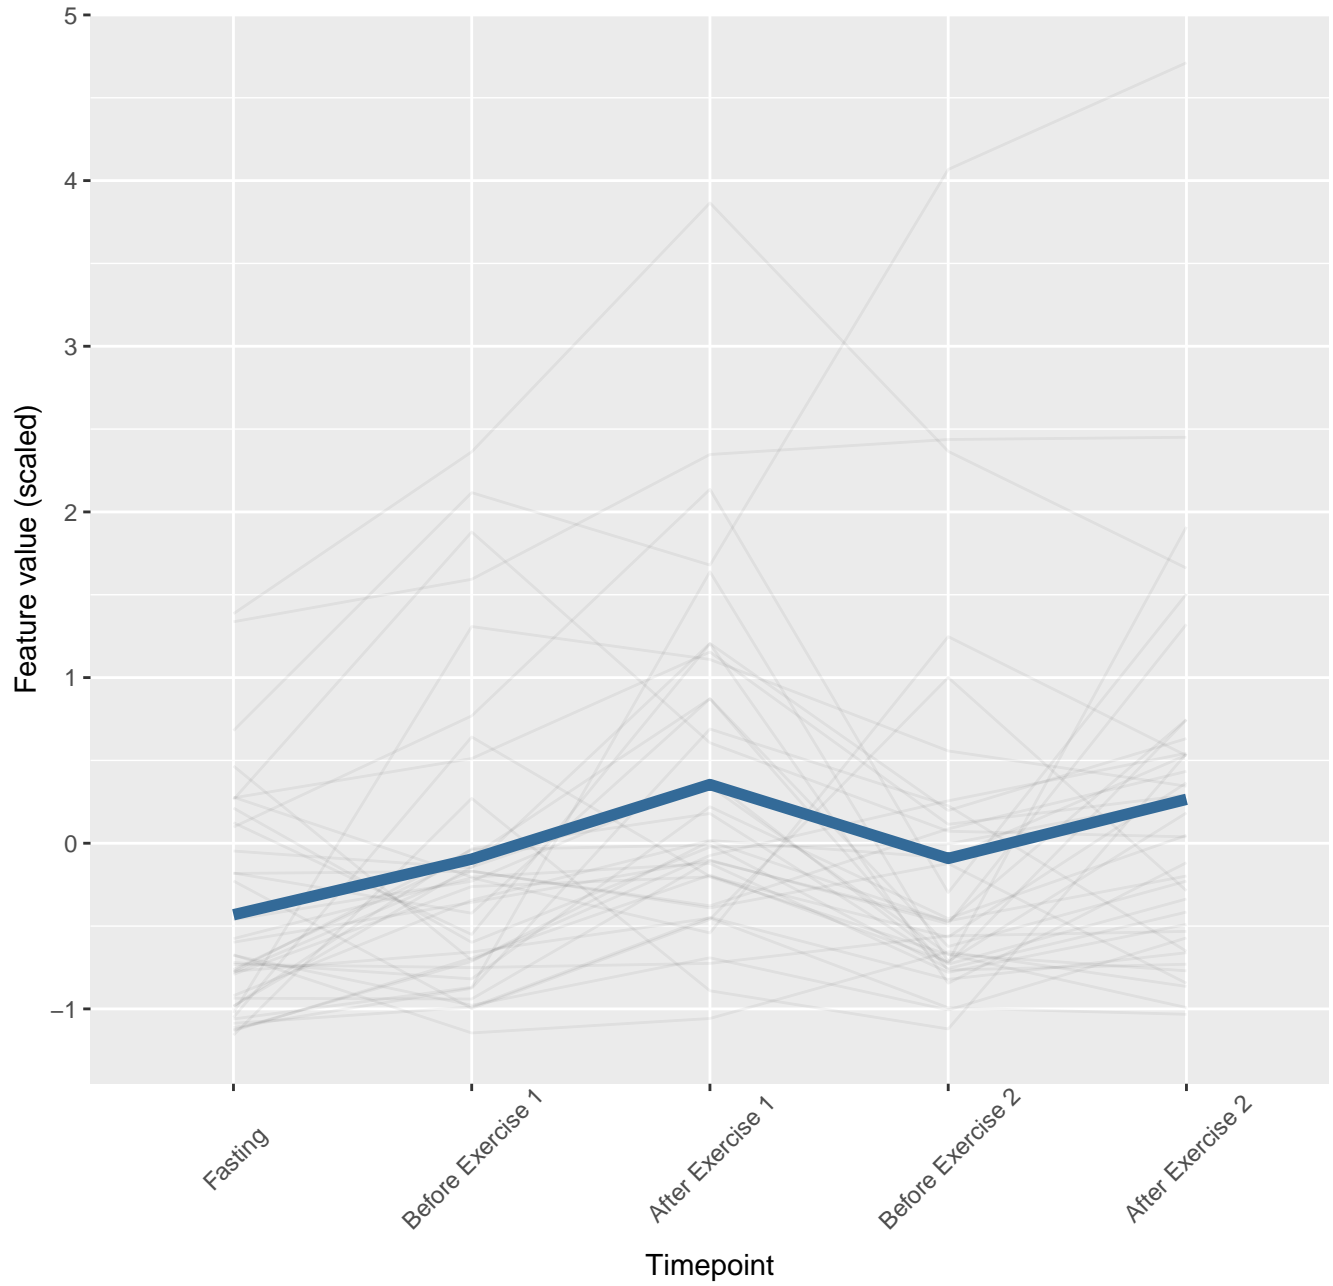



Line plot of TG(46:0)

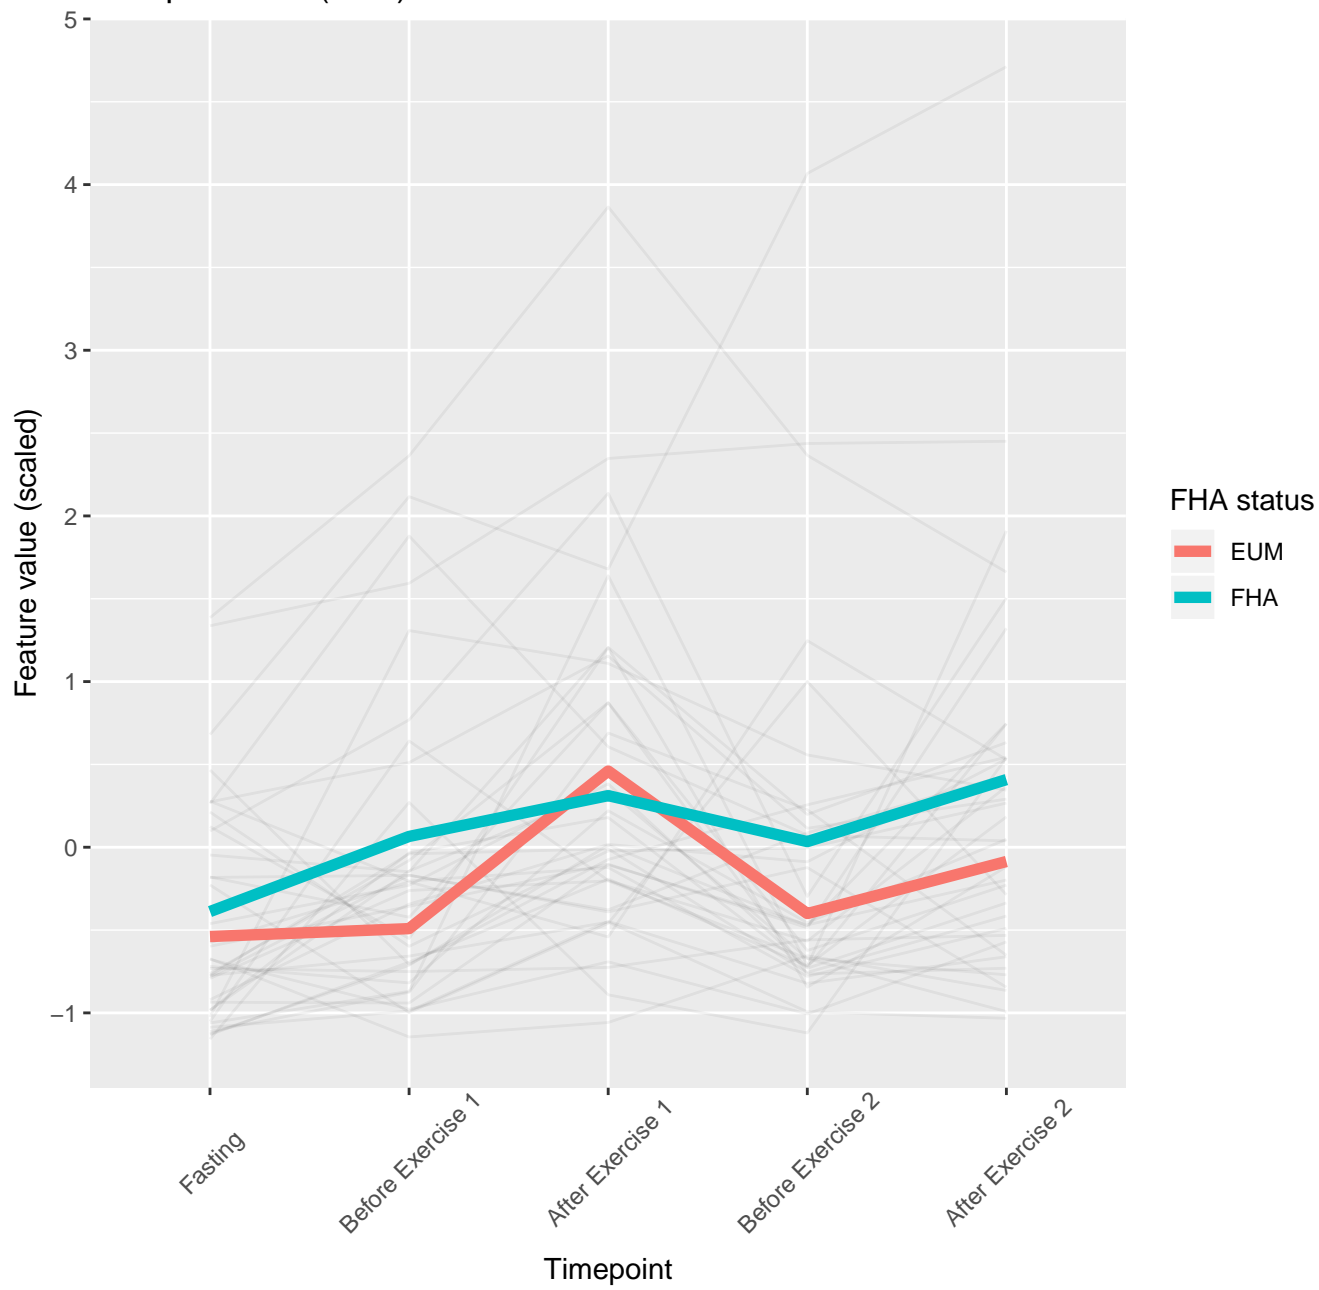

Line plot of TG(46:0)

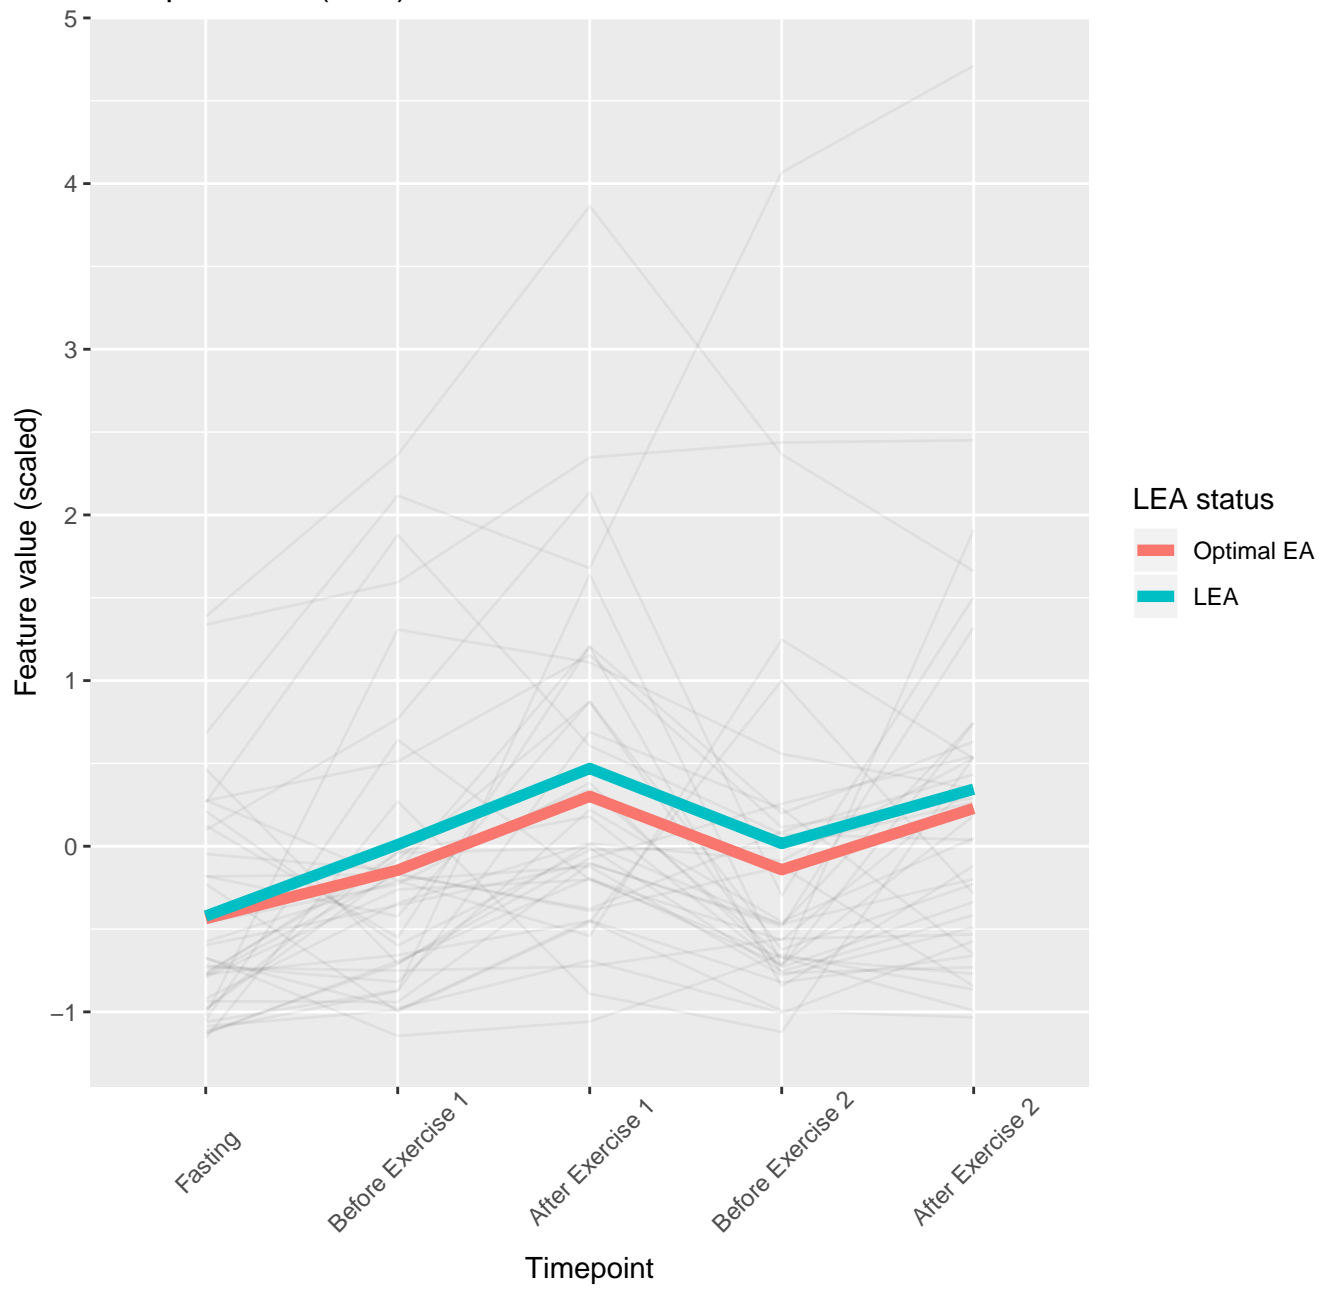

Line plot of TG(46:1)

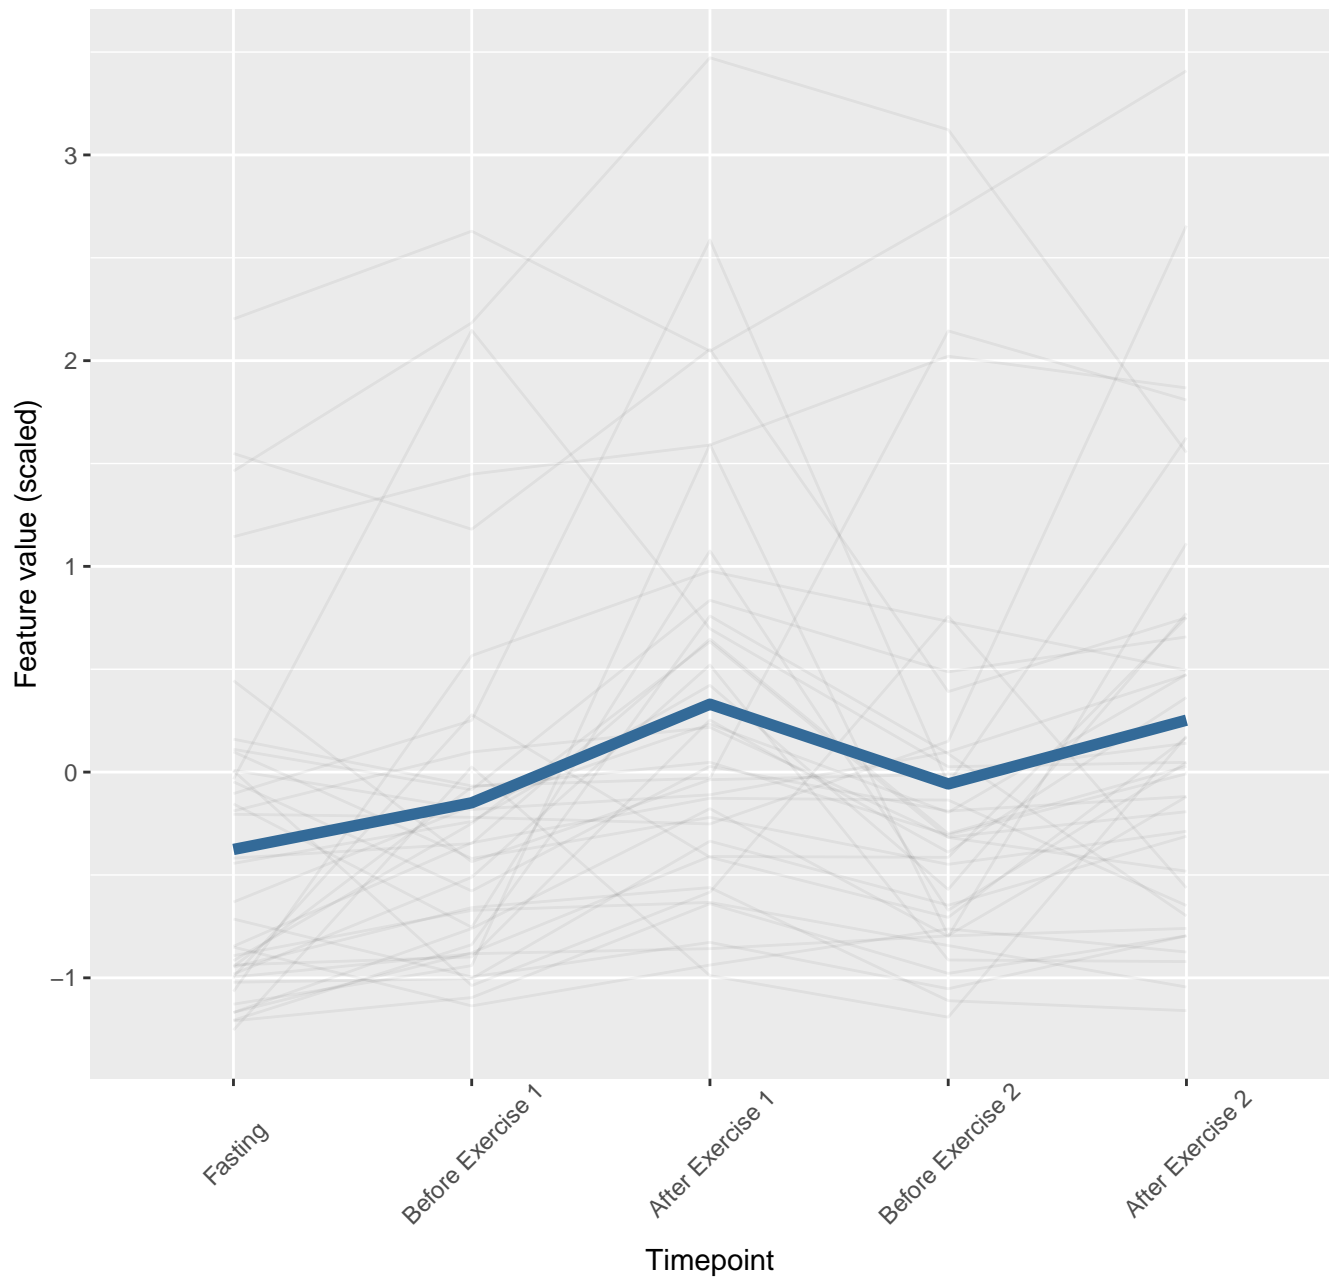

Line plot of TG(46:1)

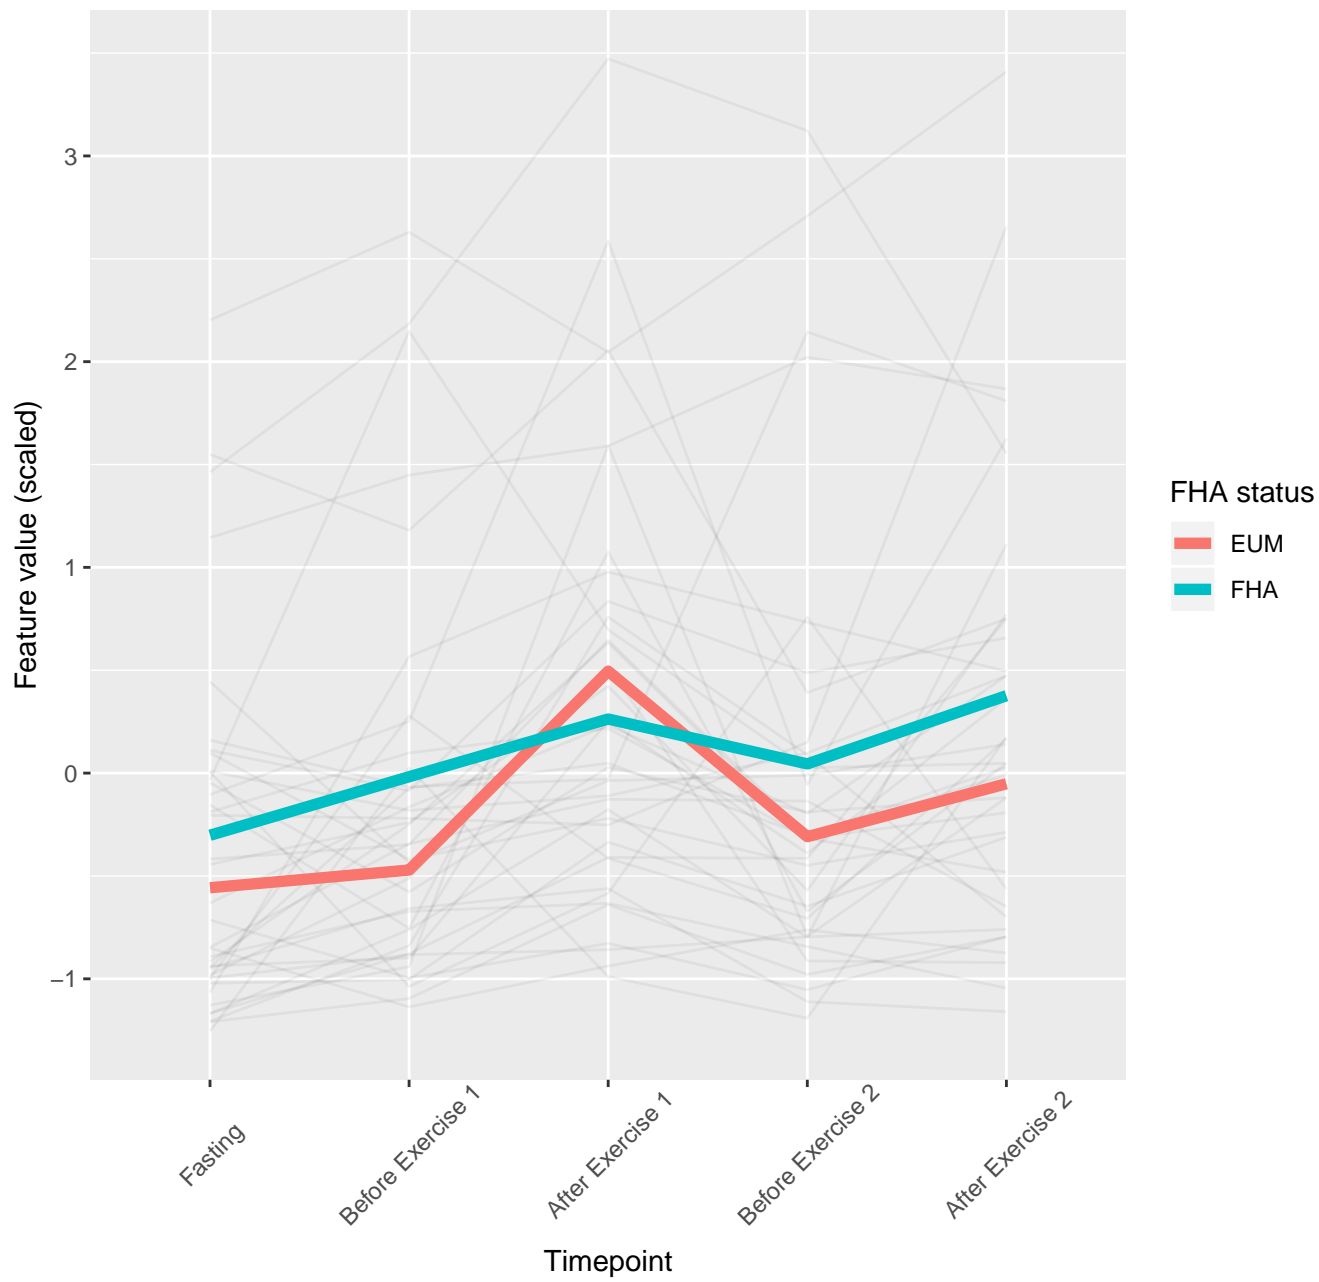

Line plot of TG(46:1)

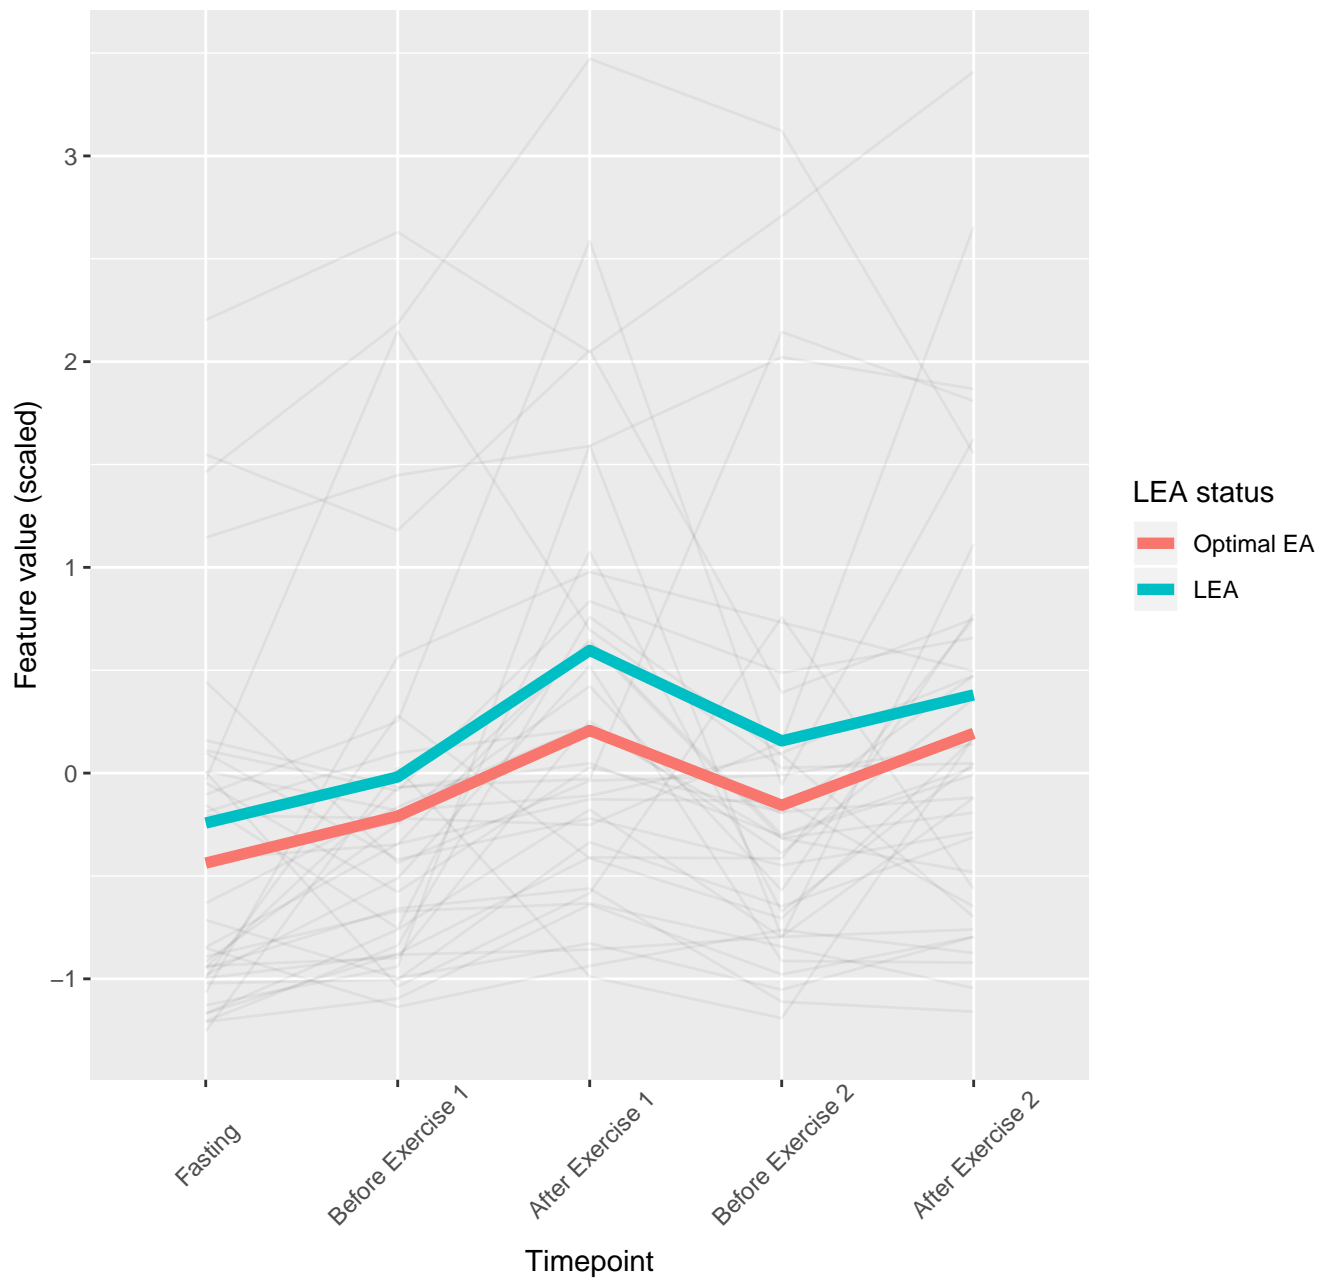

Line plot of TG(46:2)

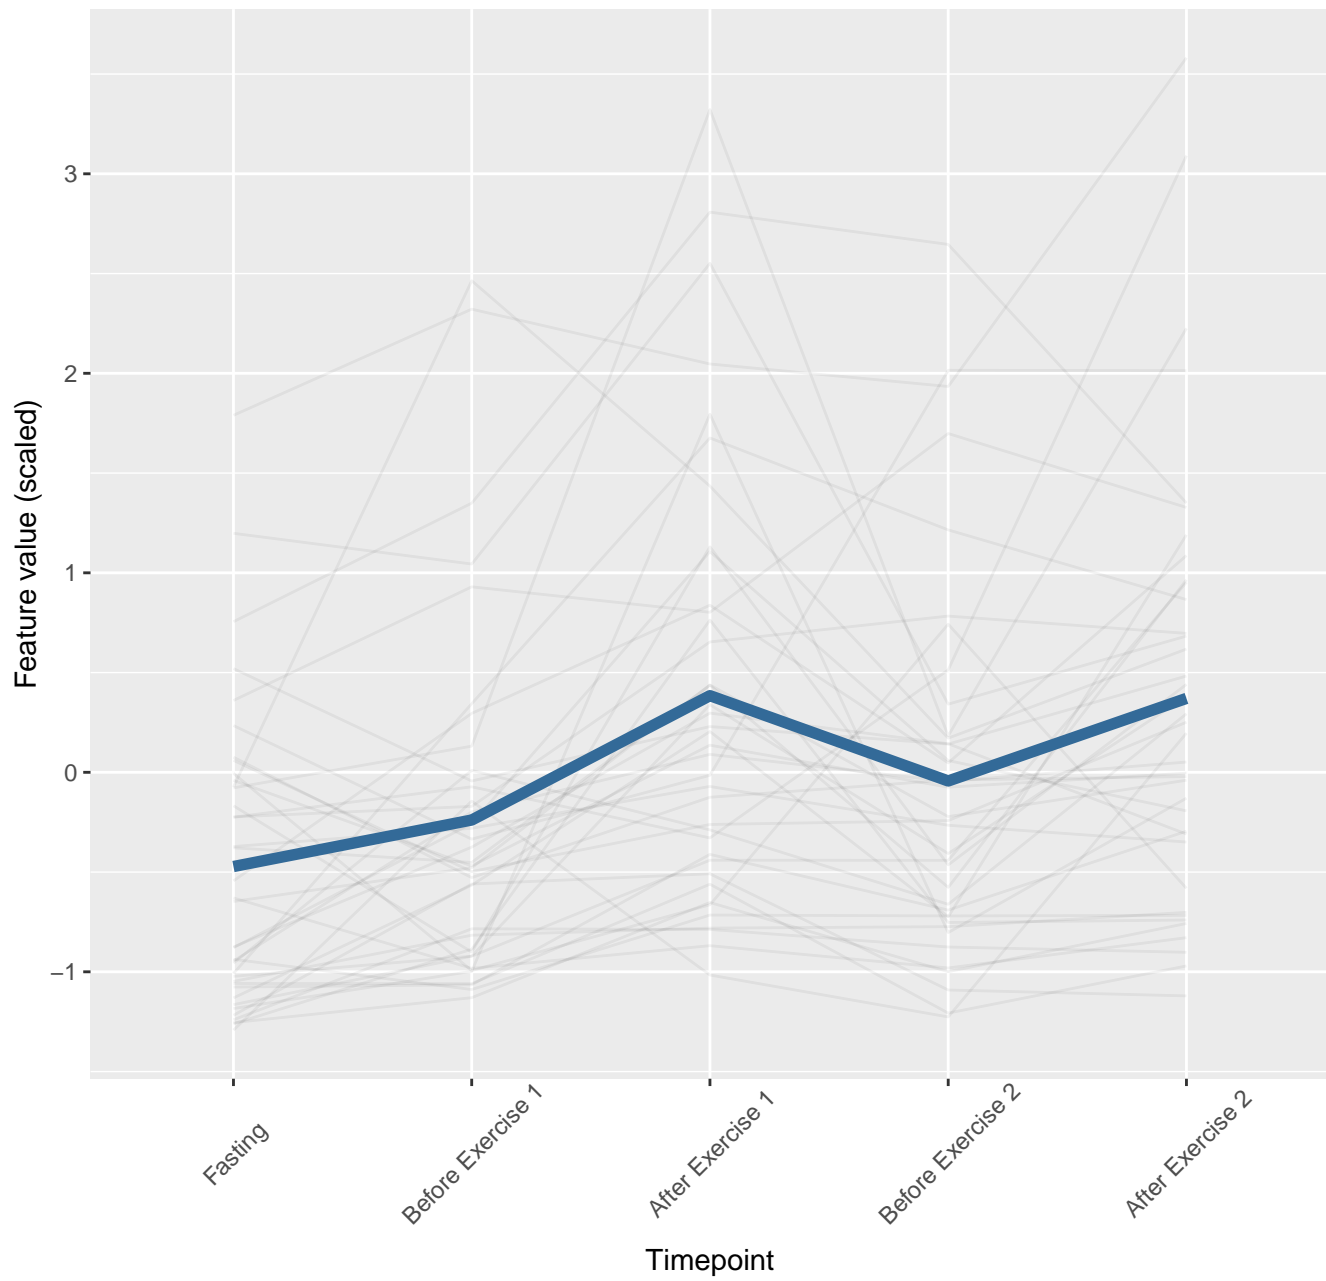

Line plot of TG(46:2)

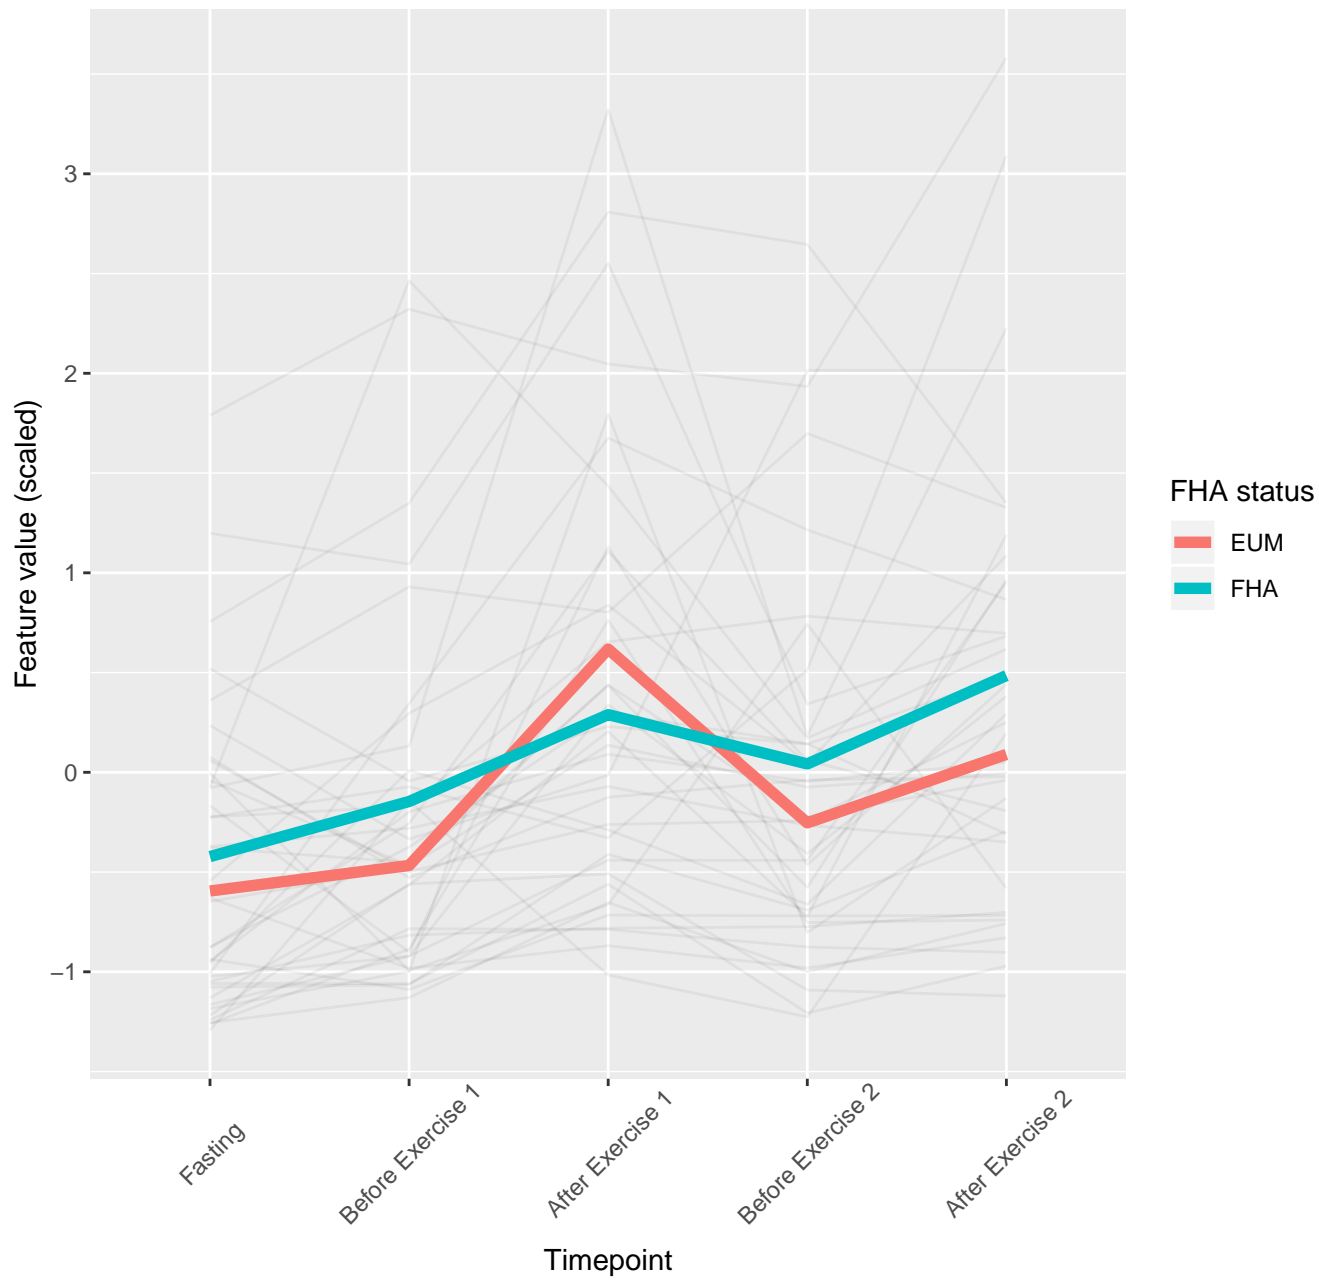

Line plot of TG(46:2)

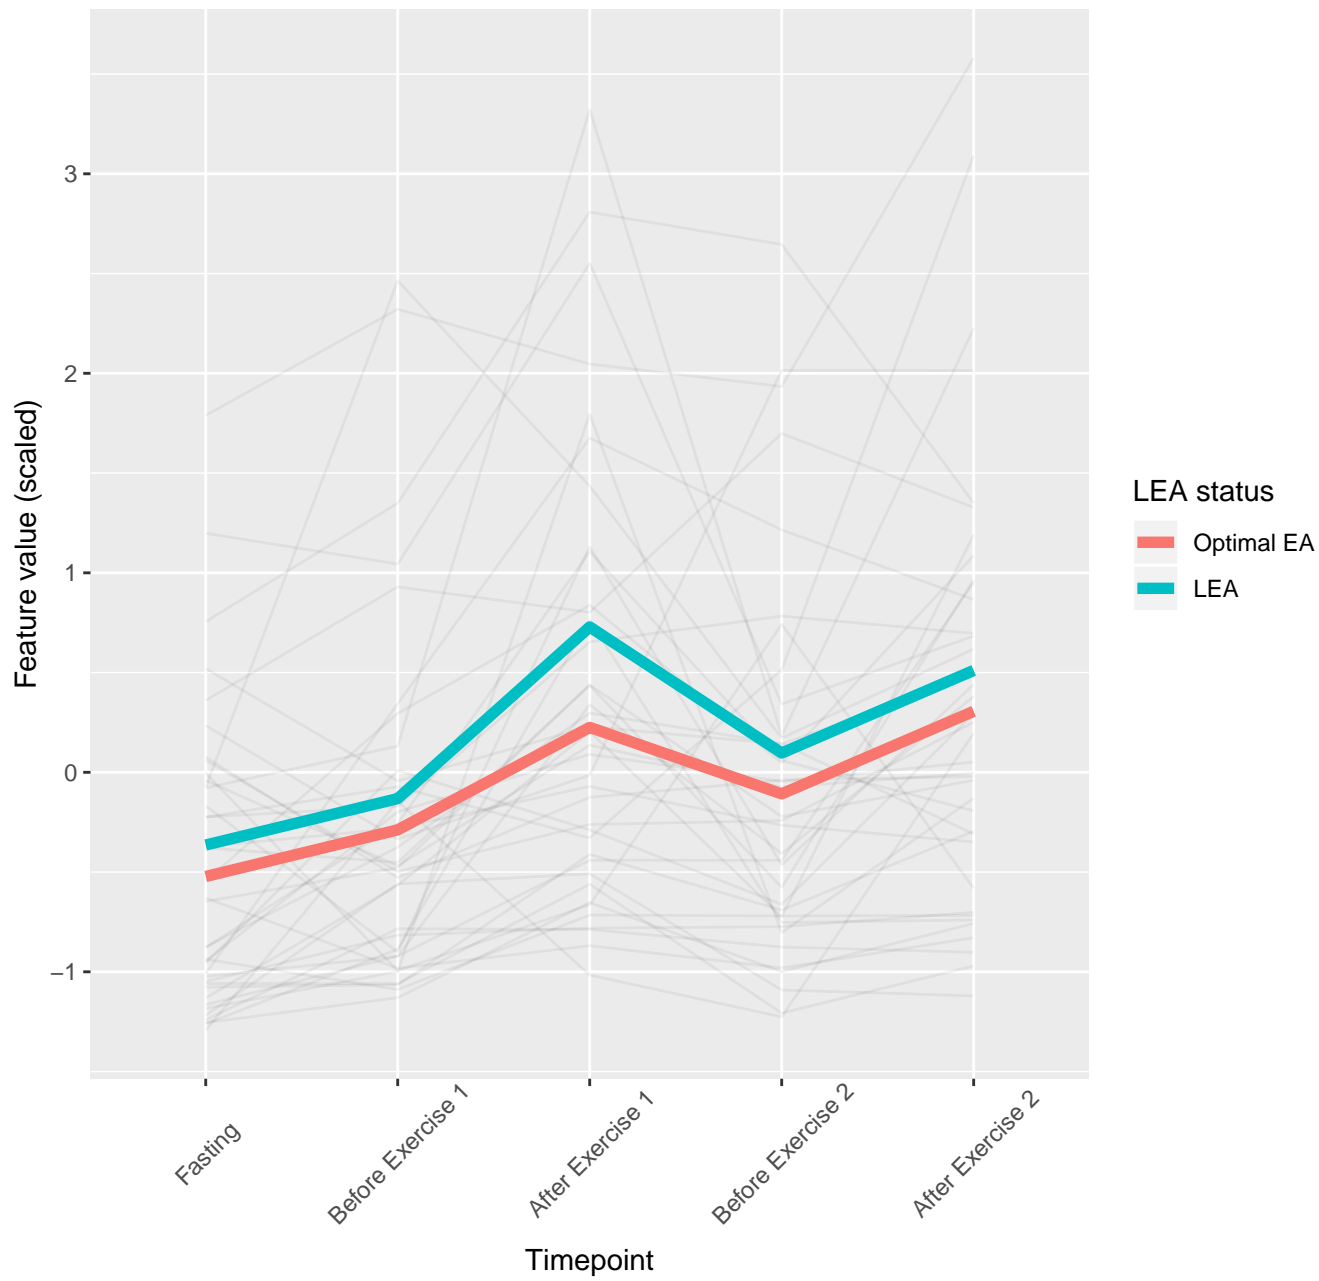



Line plot of TG(47:1)

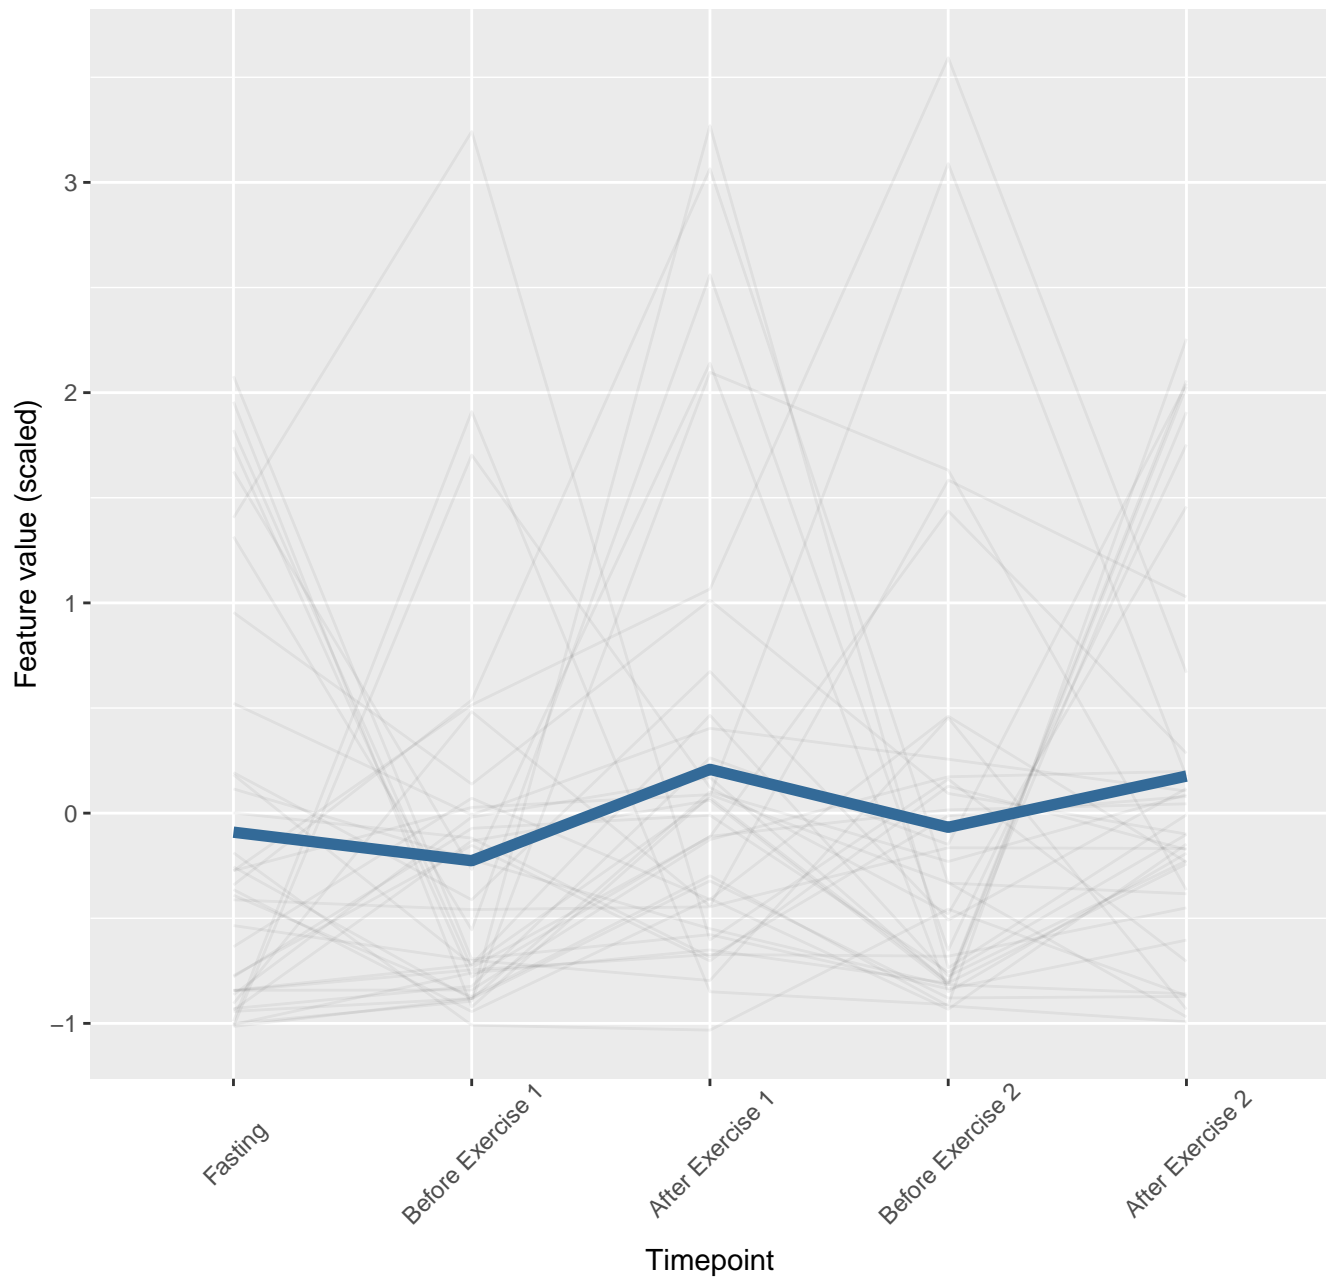

Line plot of TG(47:1)

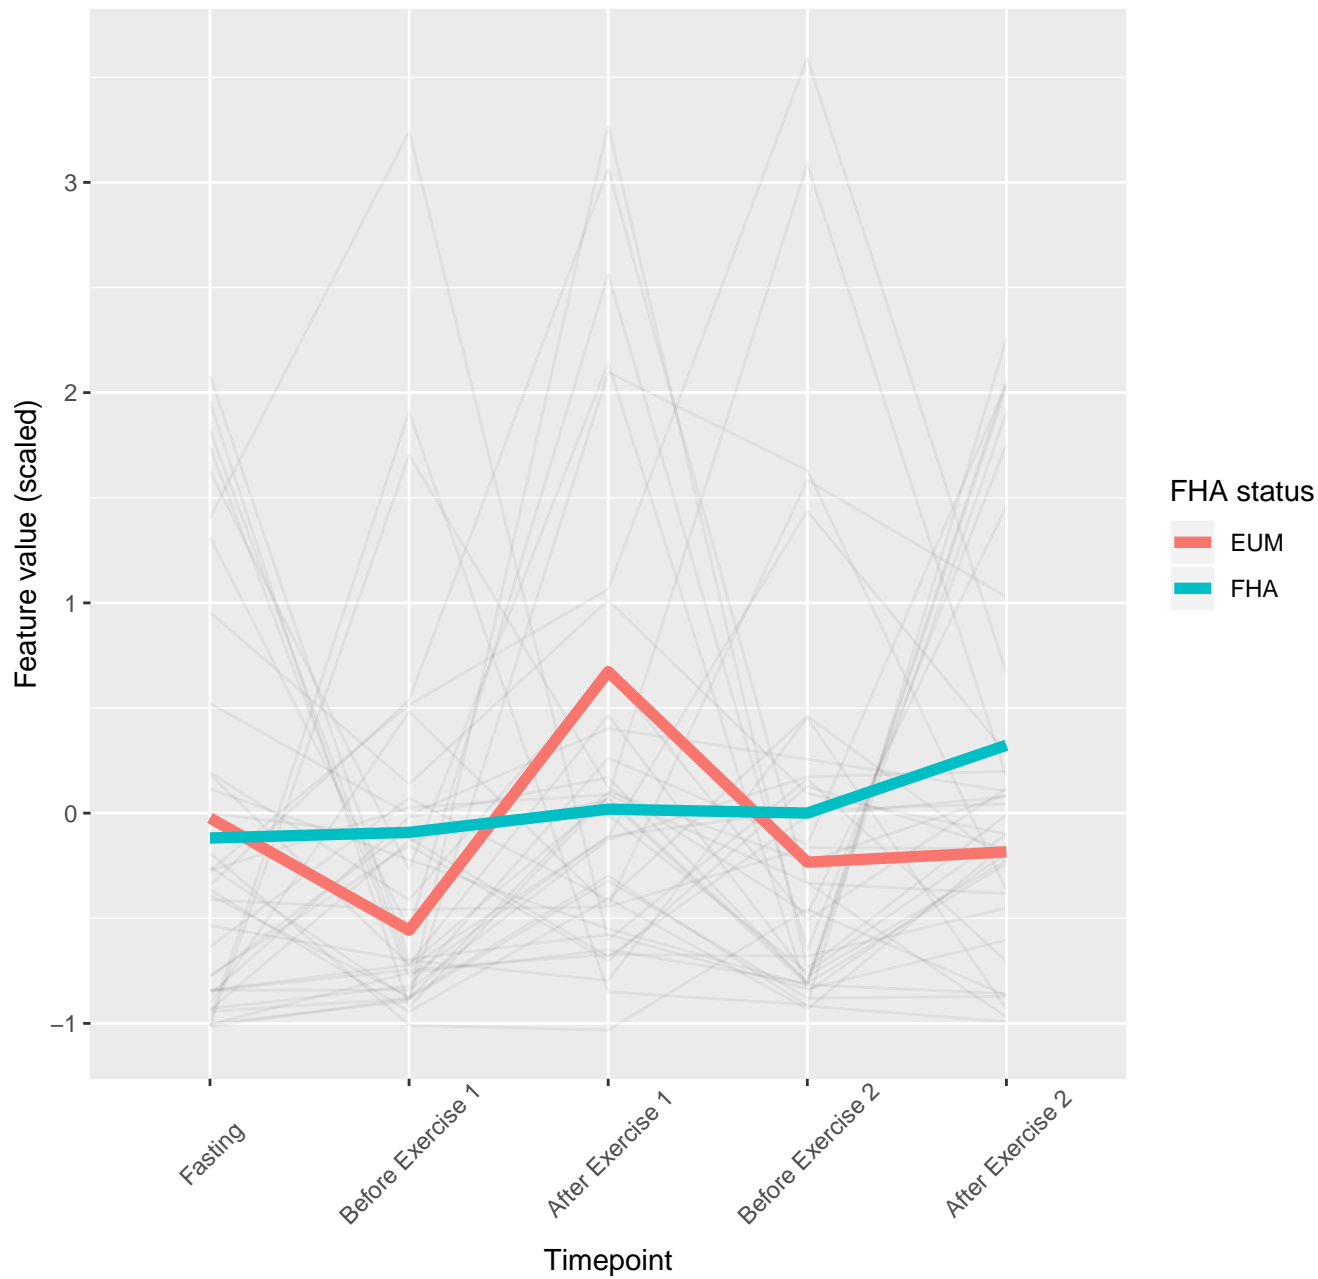

Line plot of TG(47:1)

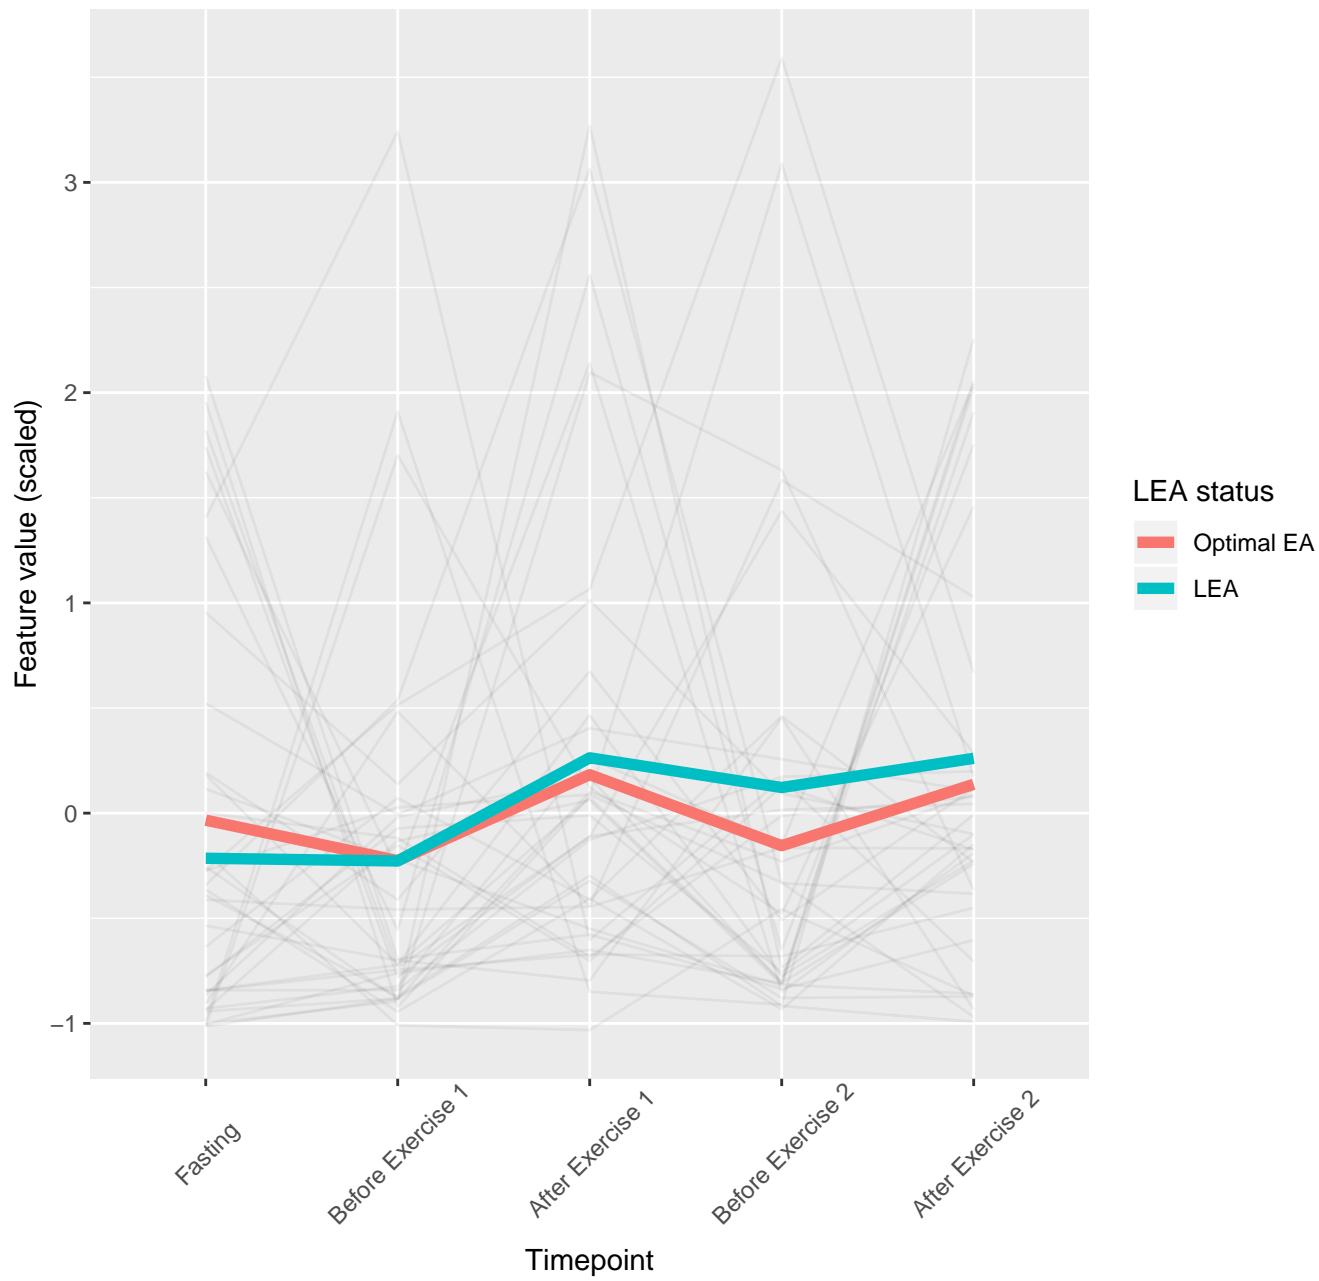

Line plot of TG(47:2)

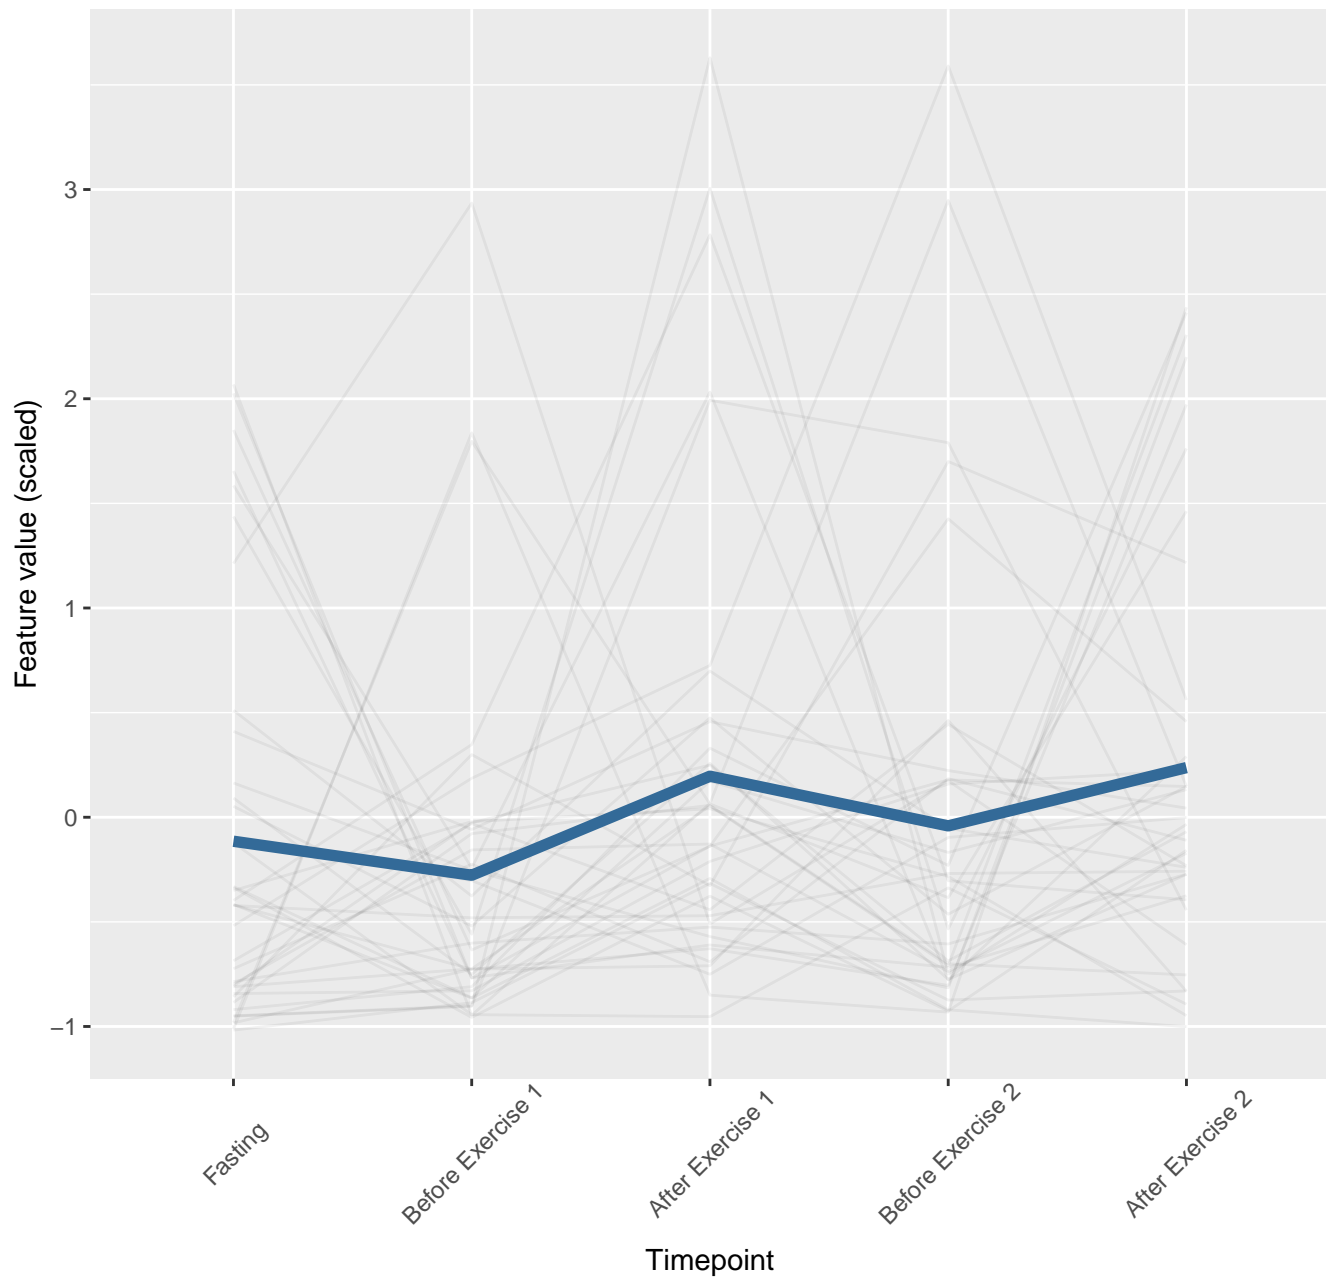

Line plot of TG(47:2)

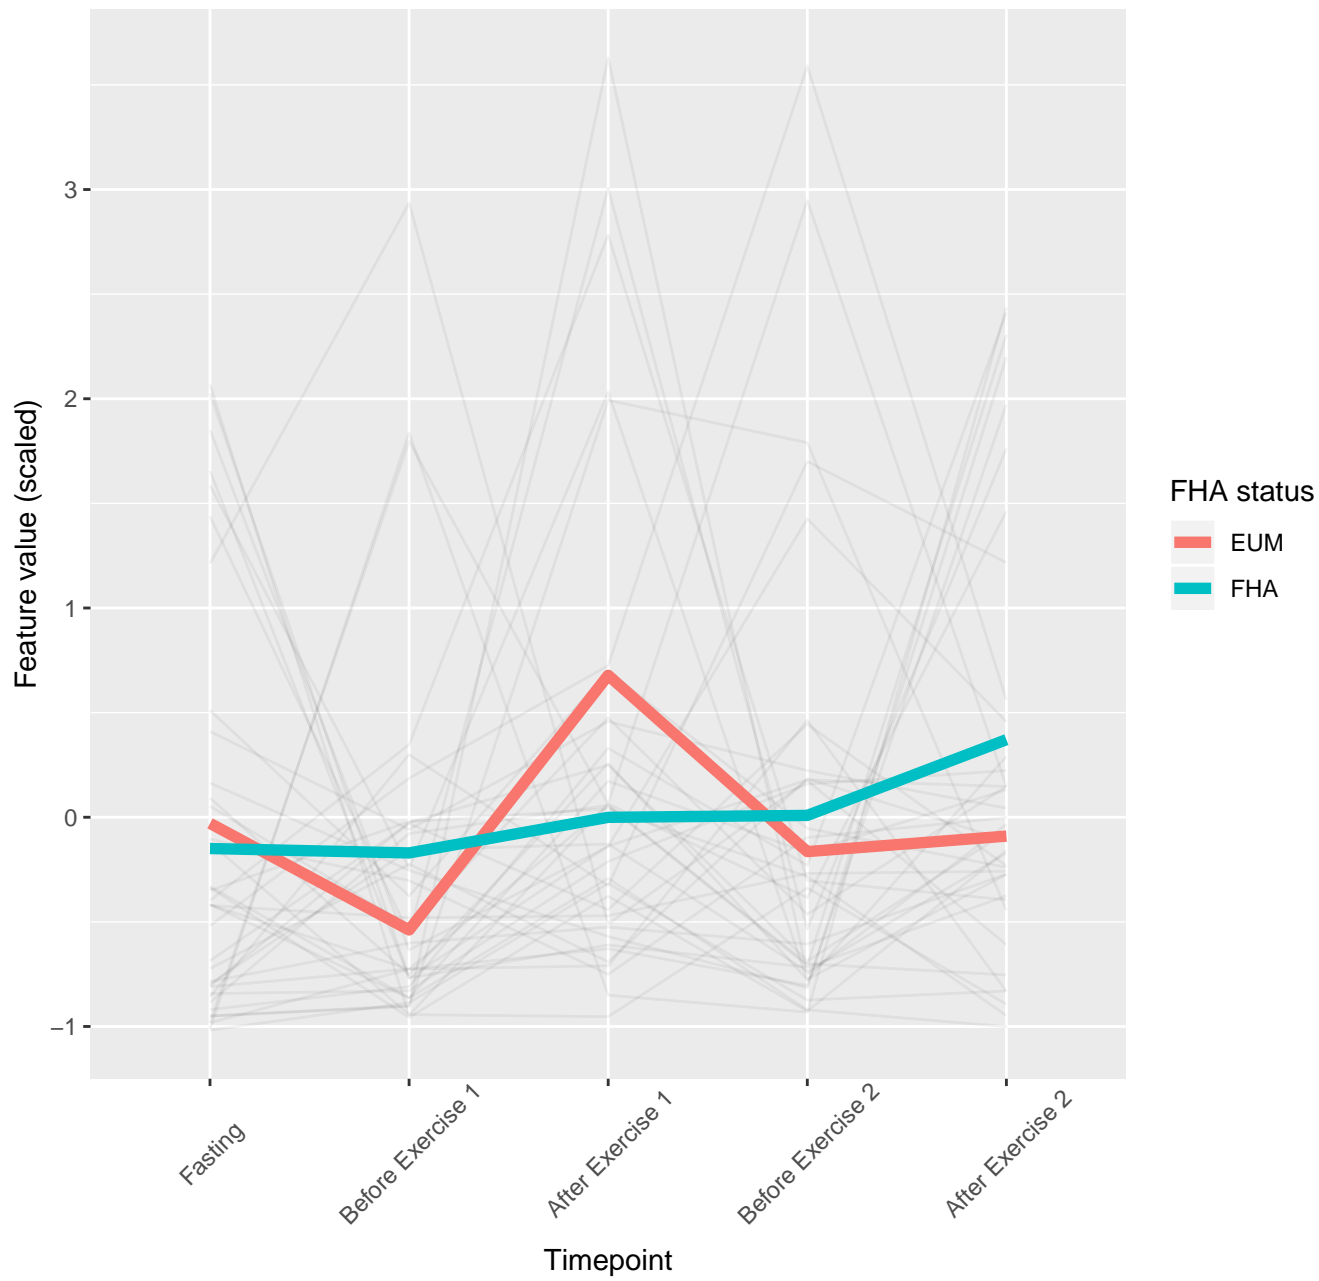

Line plot of TG(47:2)

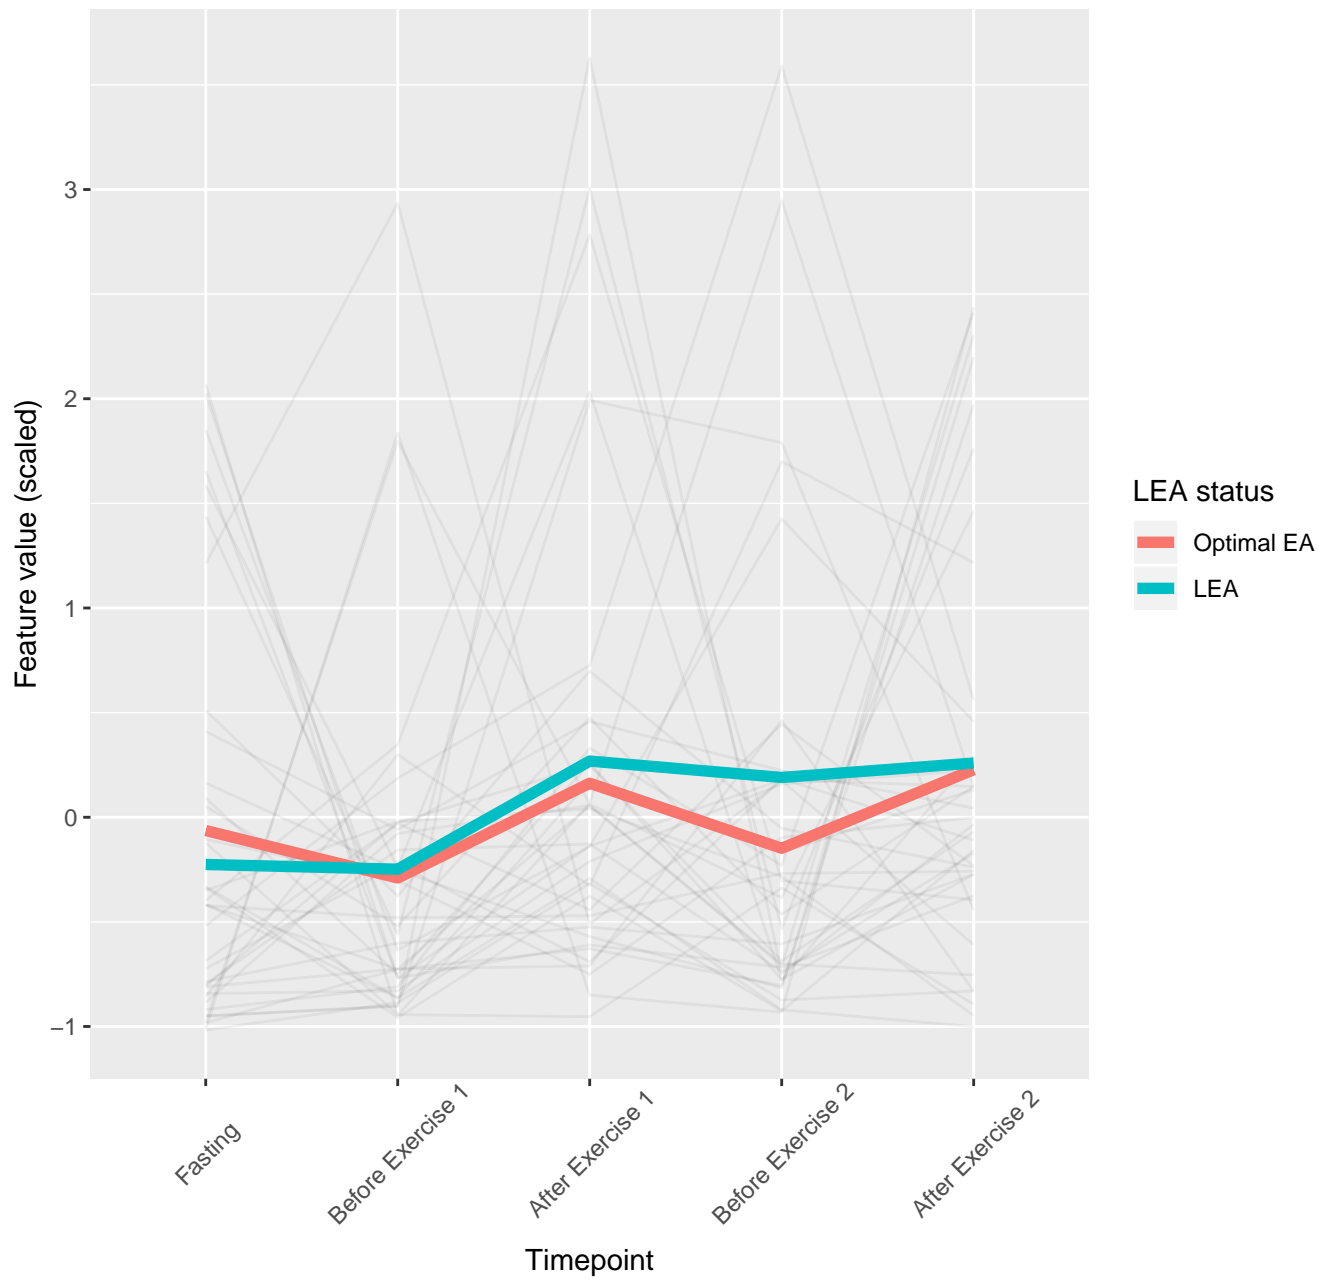

Line plot of TG(48:1)

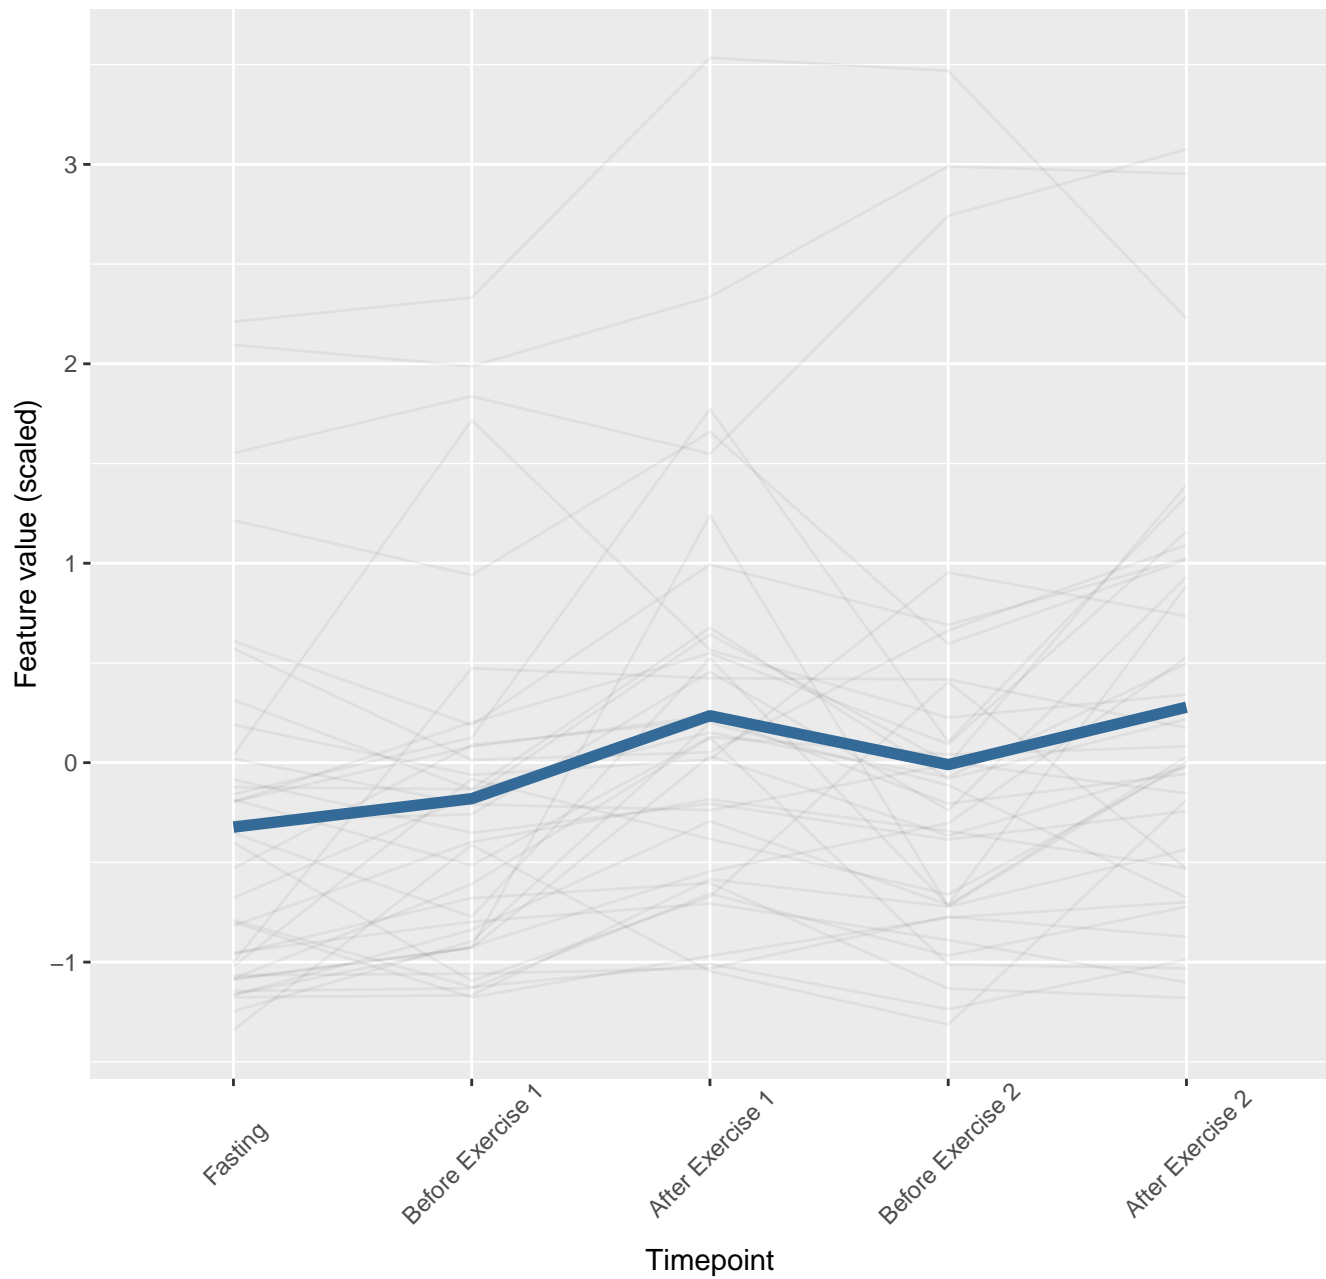

Line plot of TG(48:1)

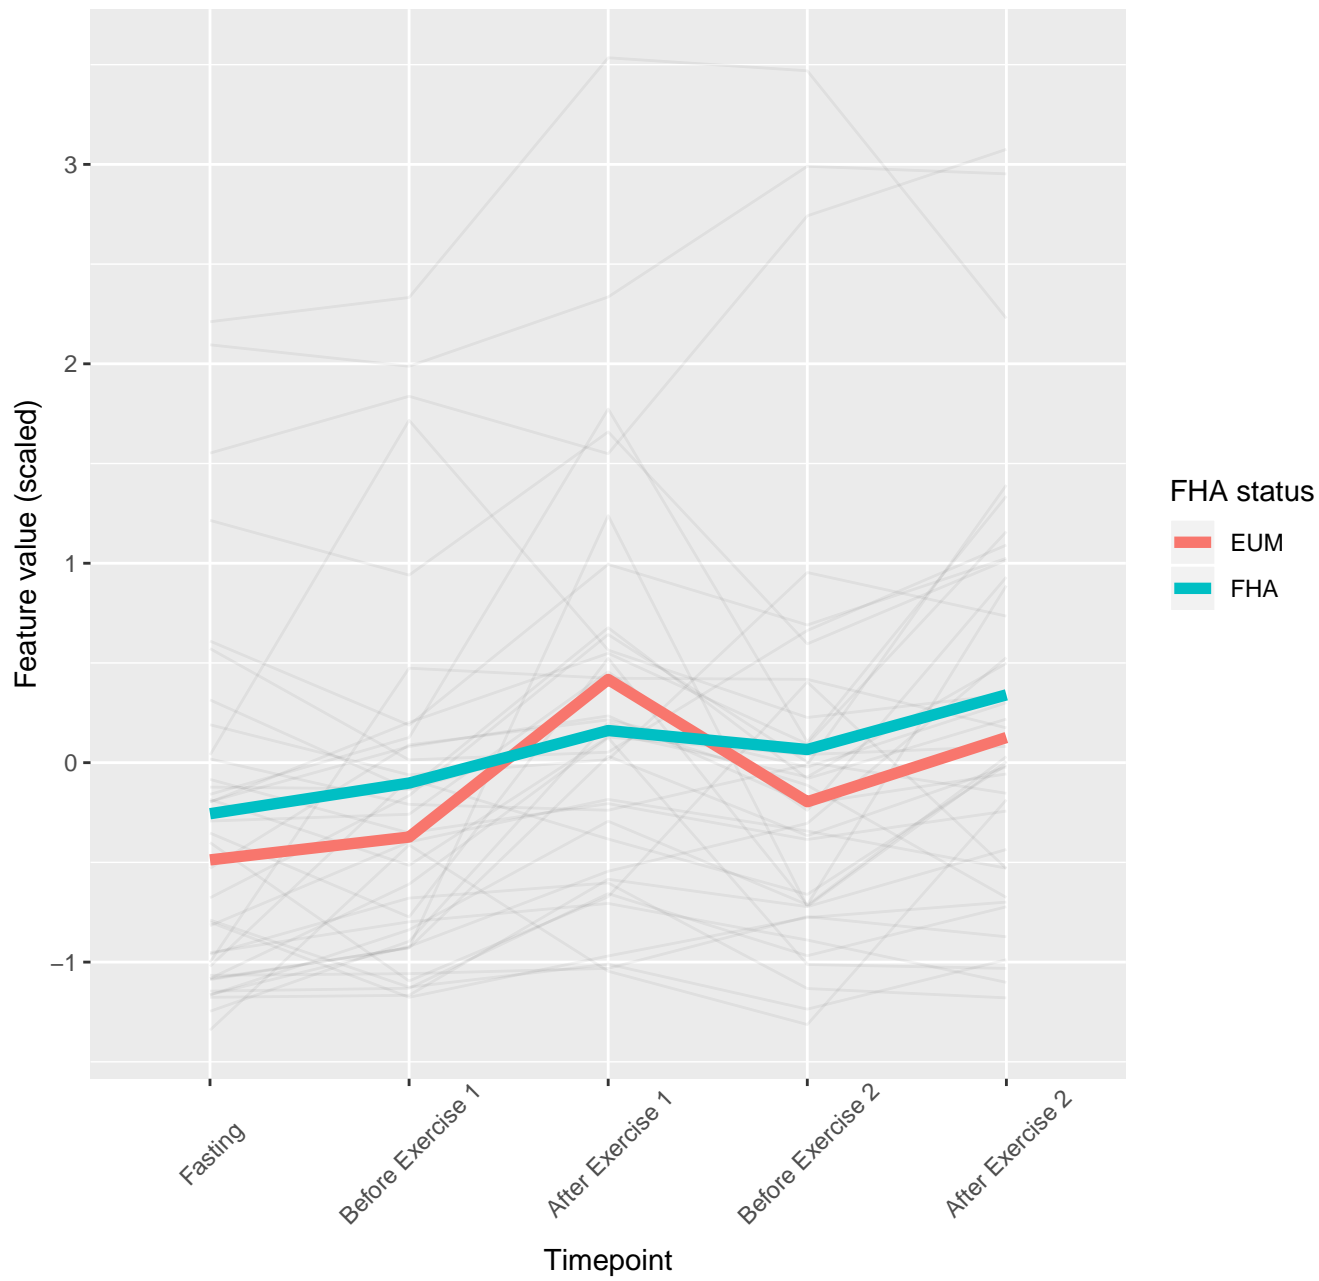



Line plot of TG(48:1)

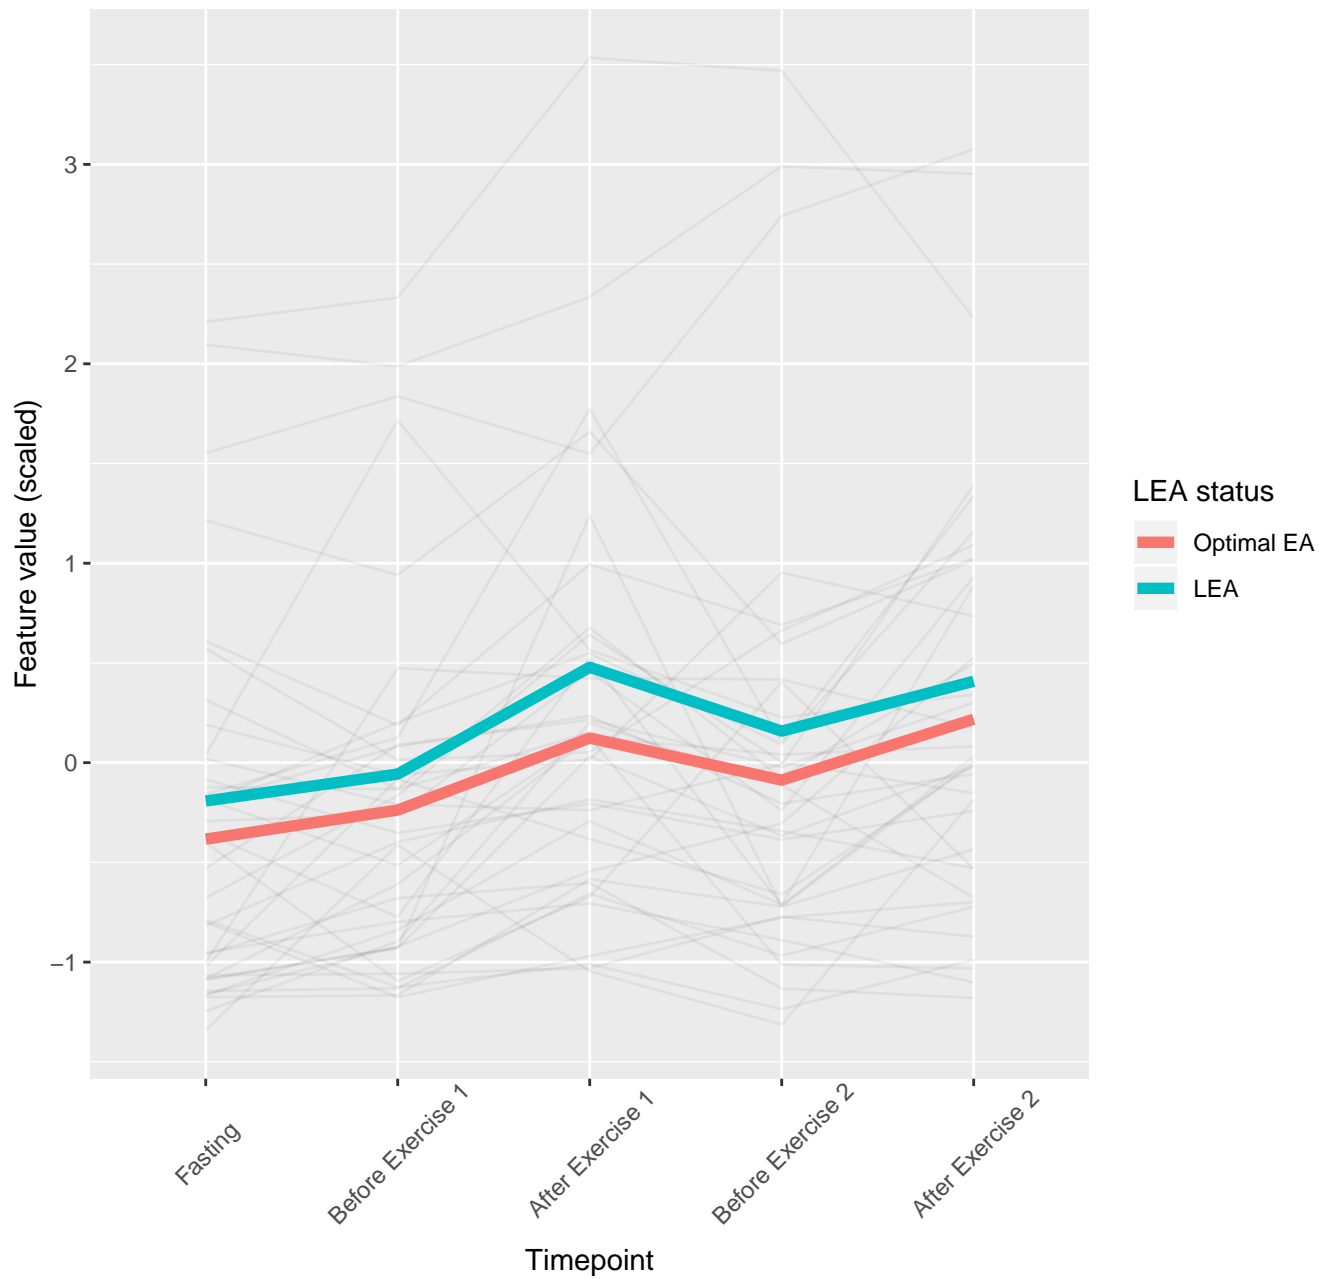

Line plot of TG(49:0)

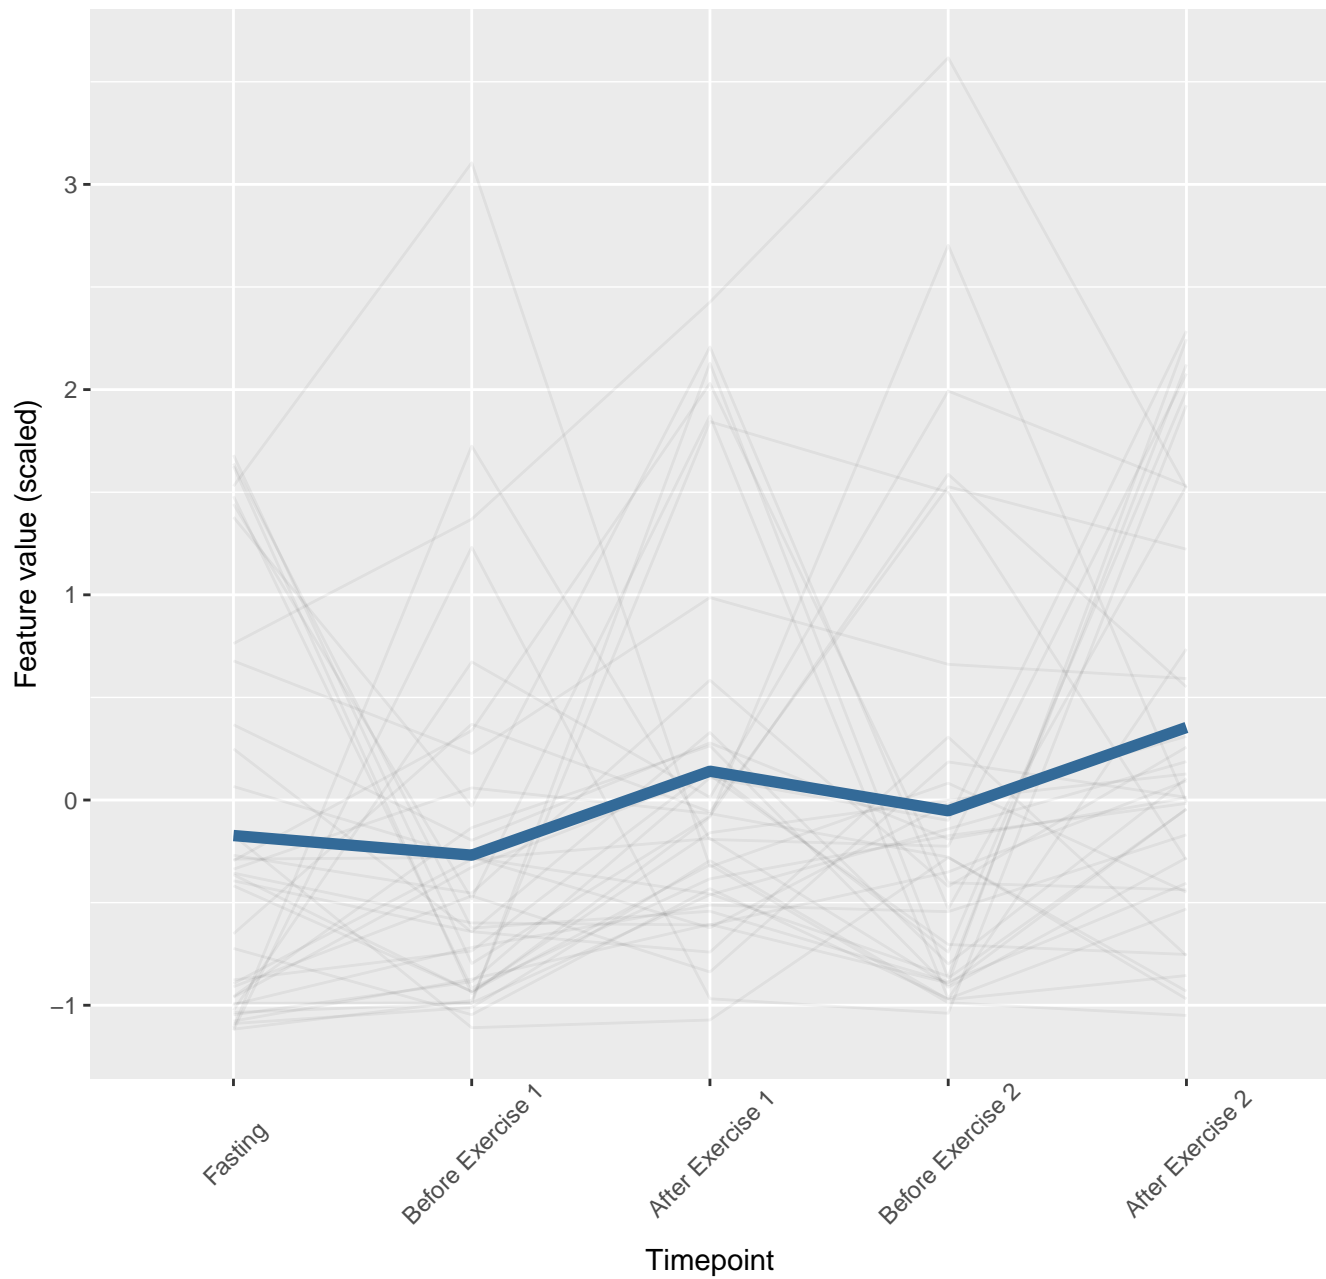

Line plot of TG(49:0)

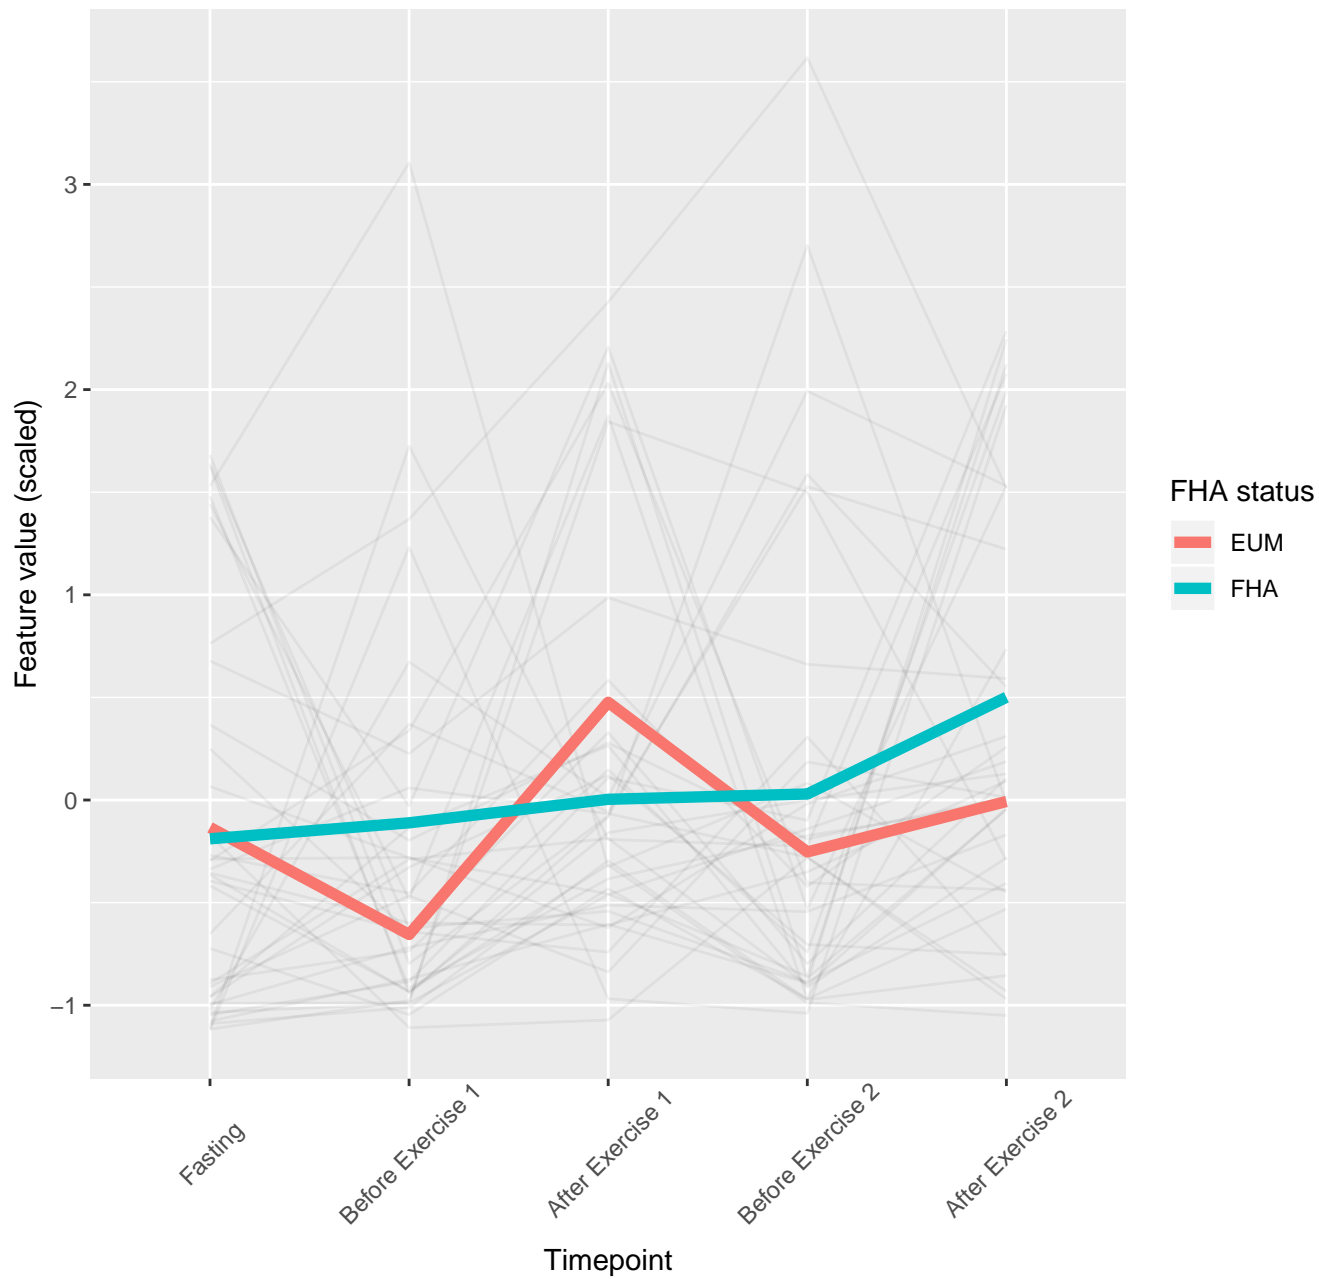

Line plot of TG(49:0)

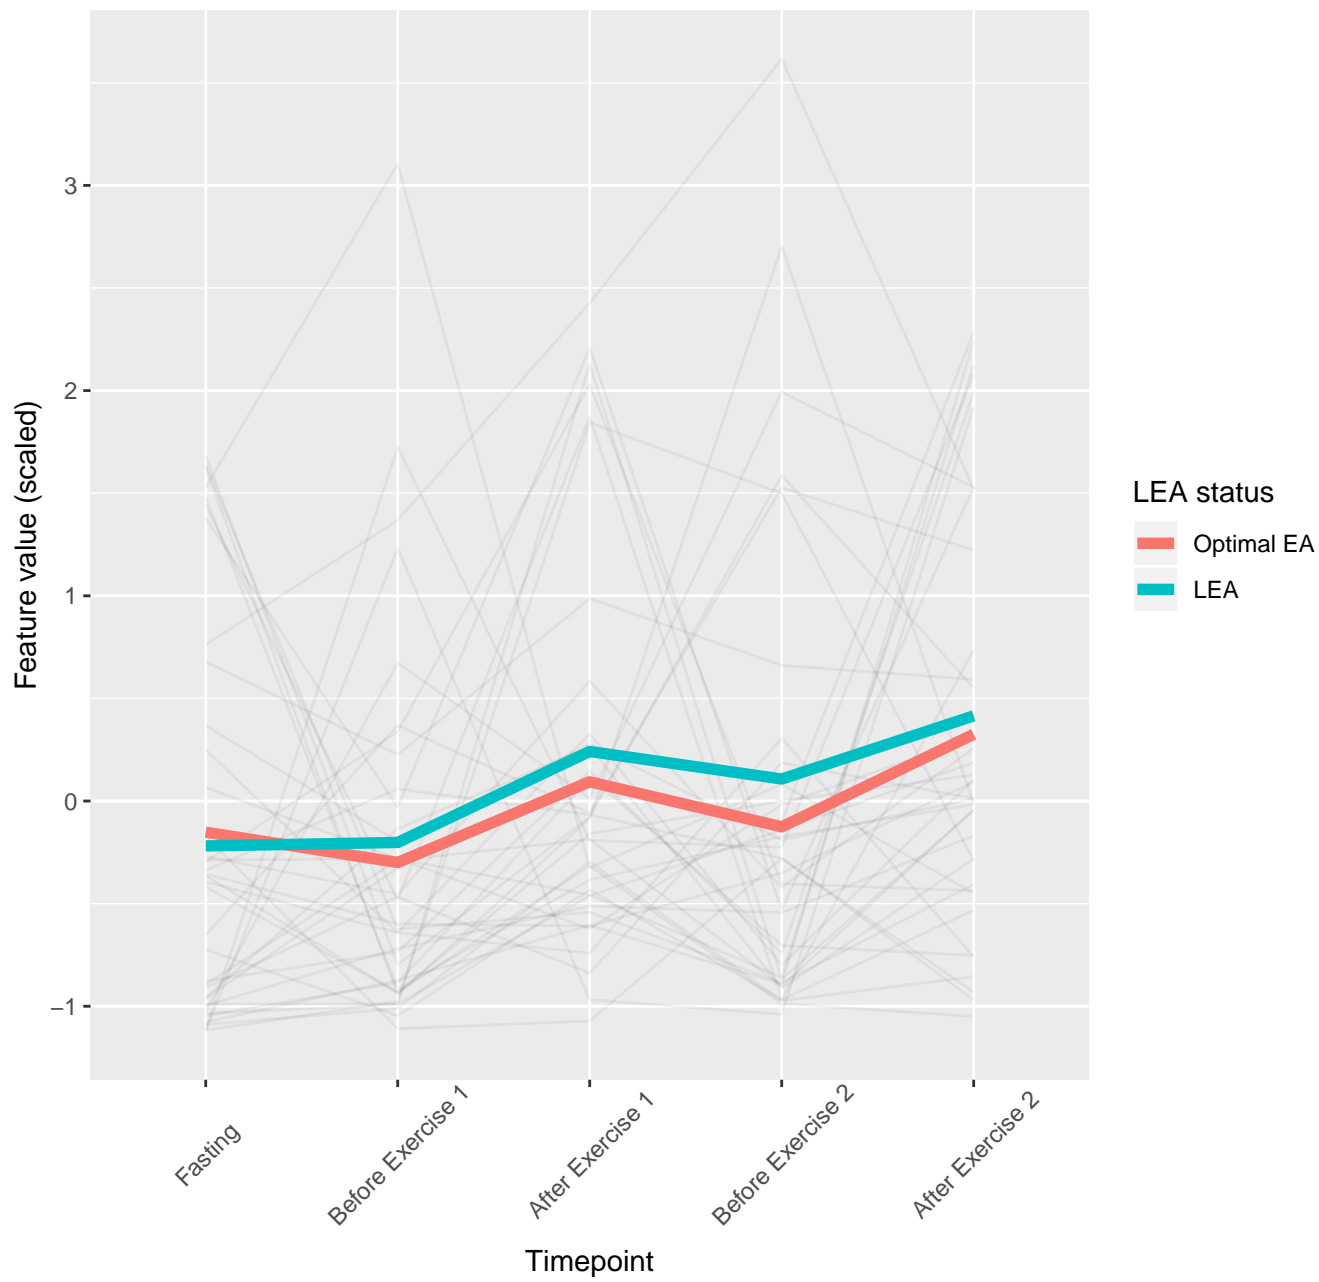

Line plot of TG(49:1)

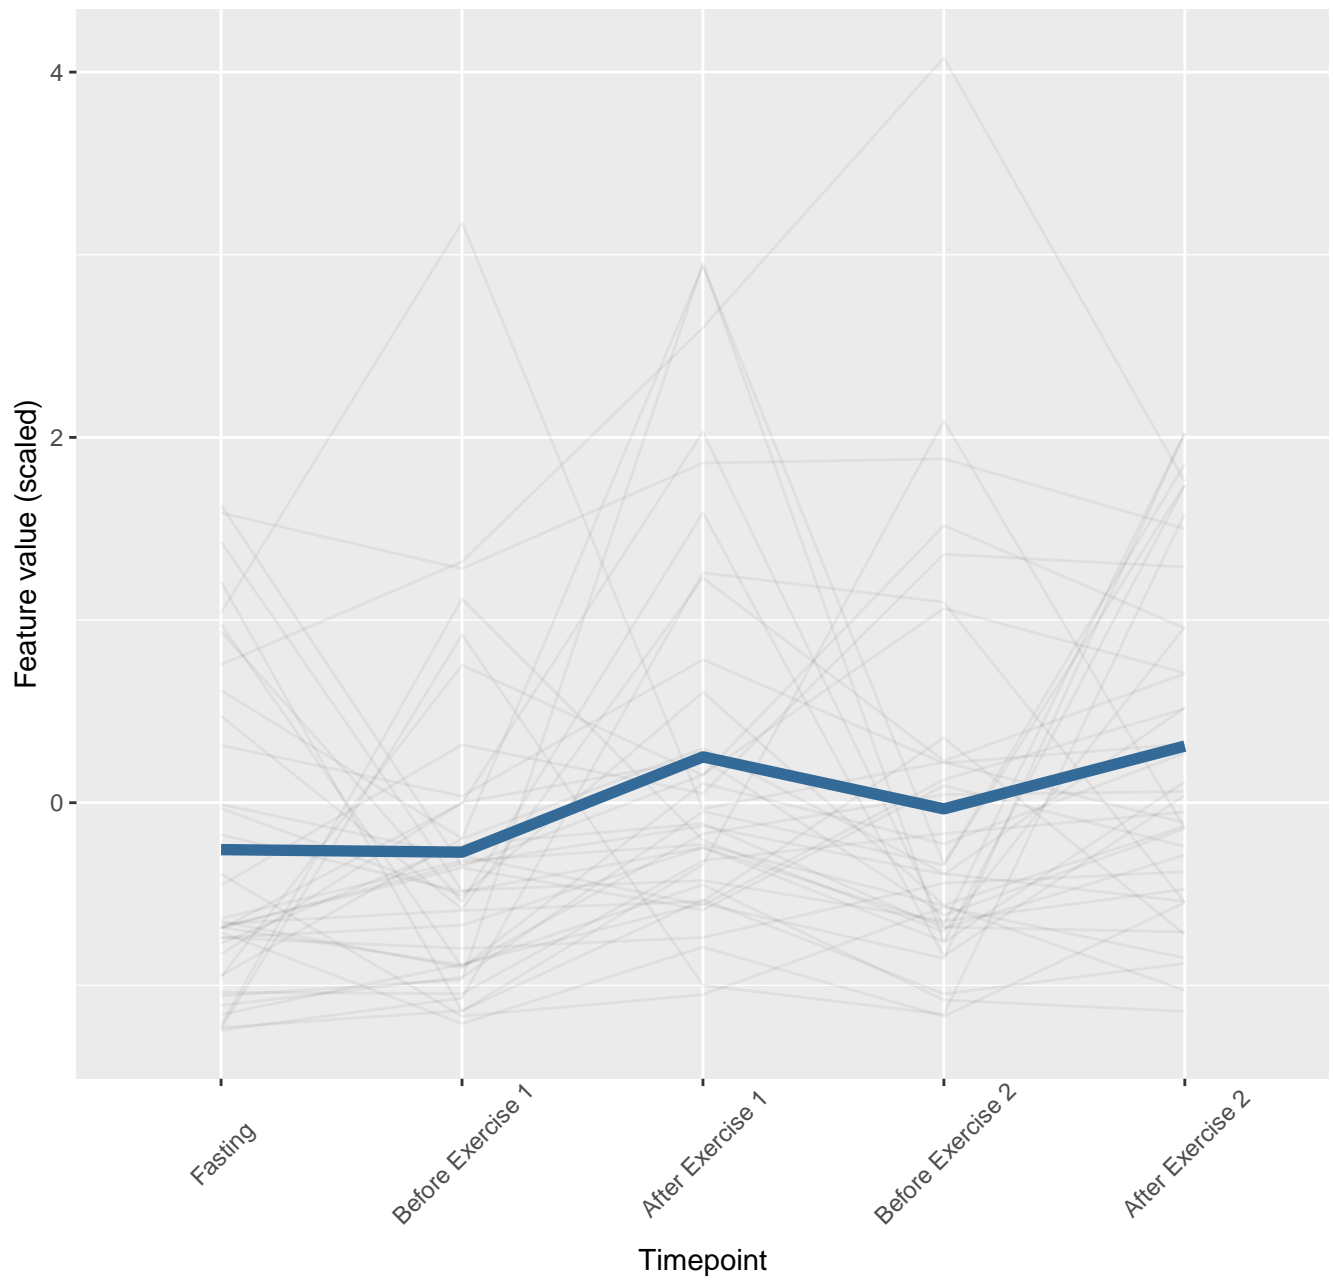

Line plot of TG(49:1)

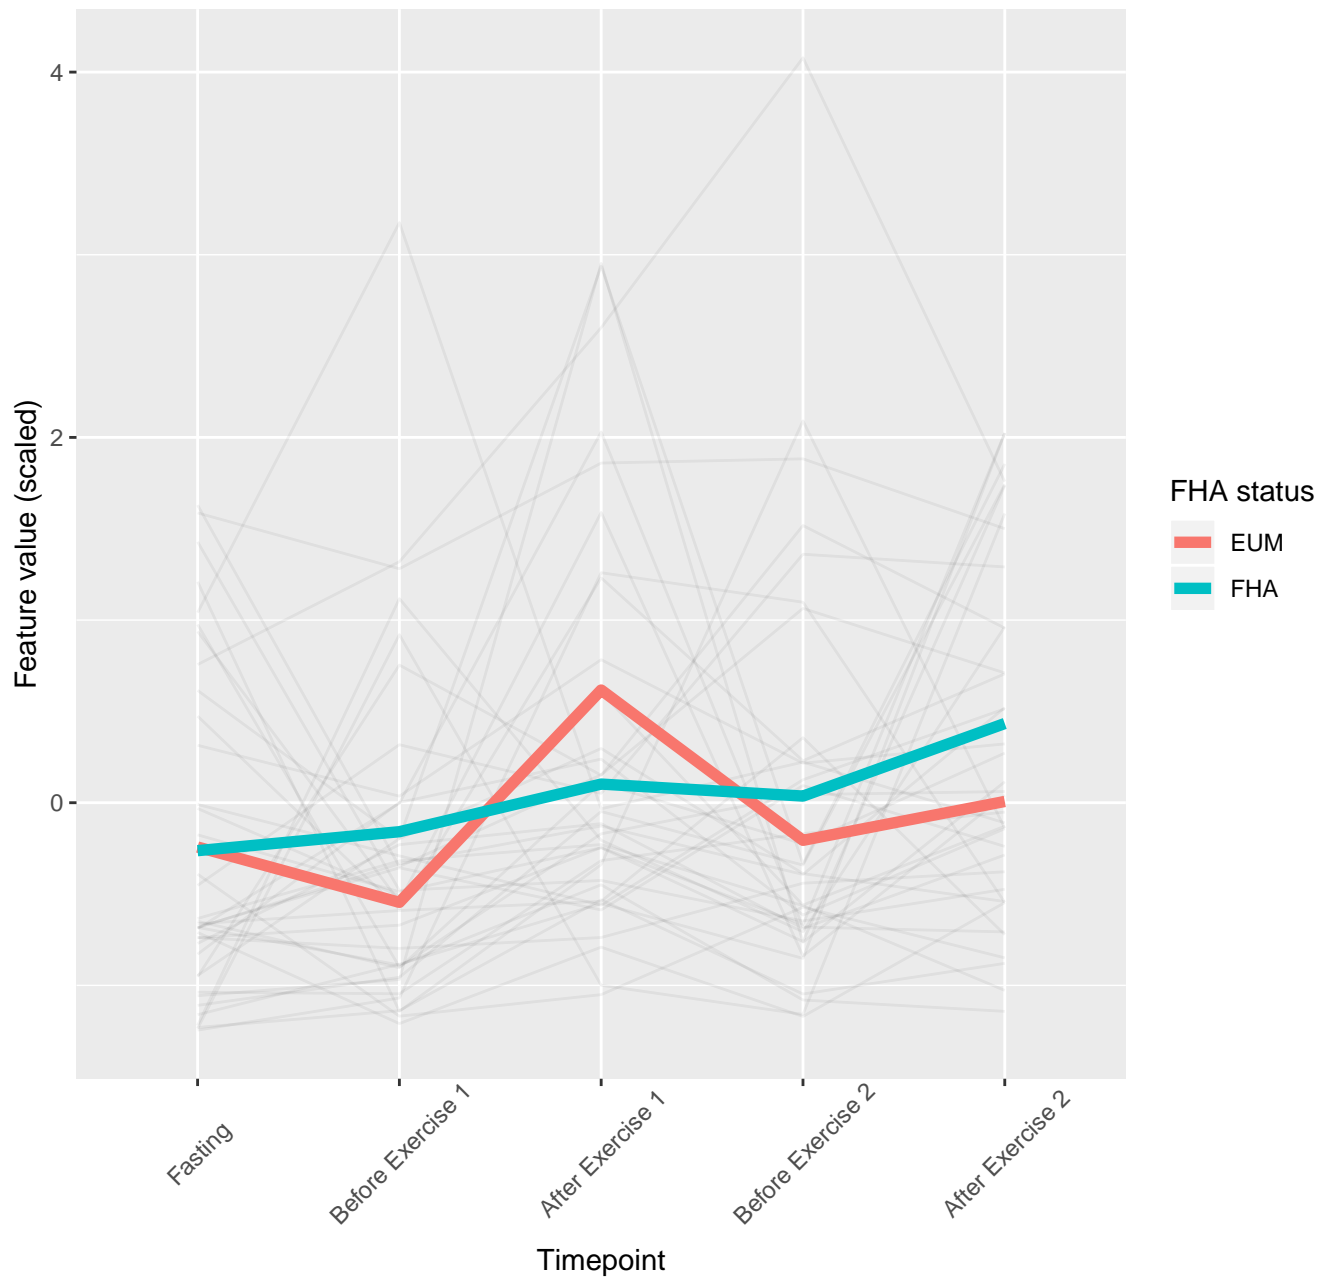

Line plot of TG(49:1)

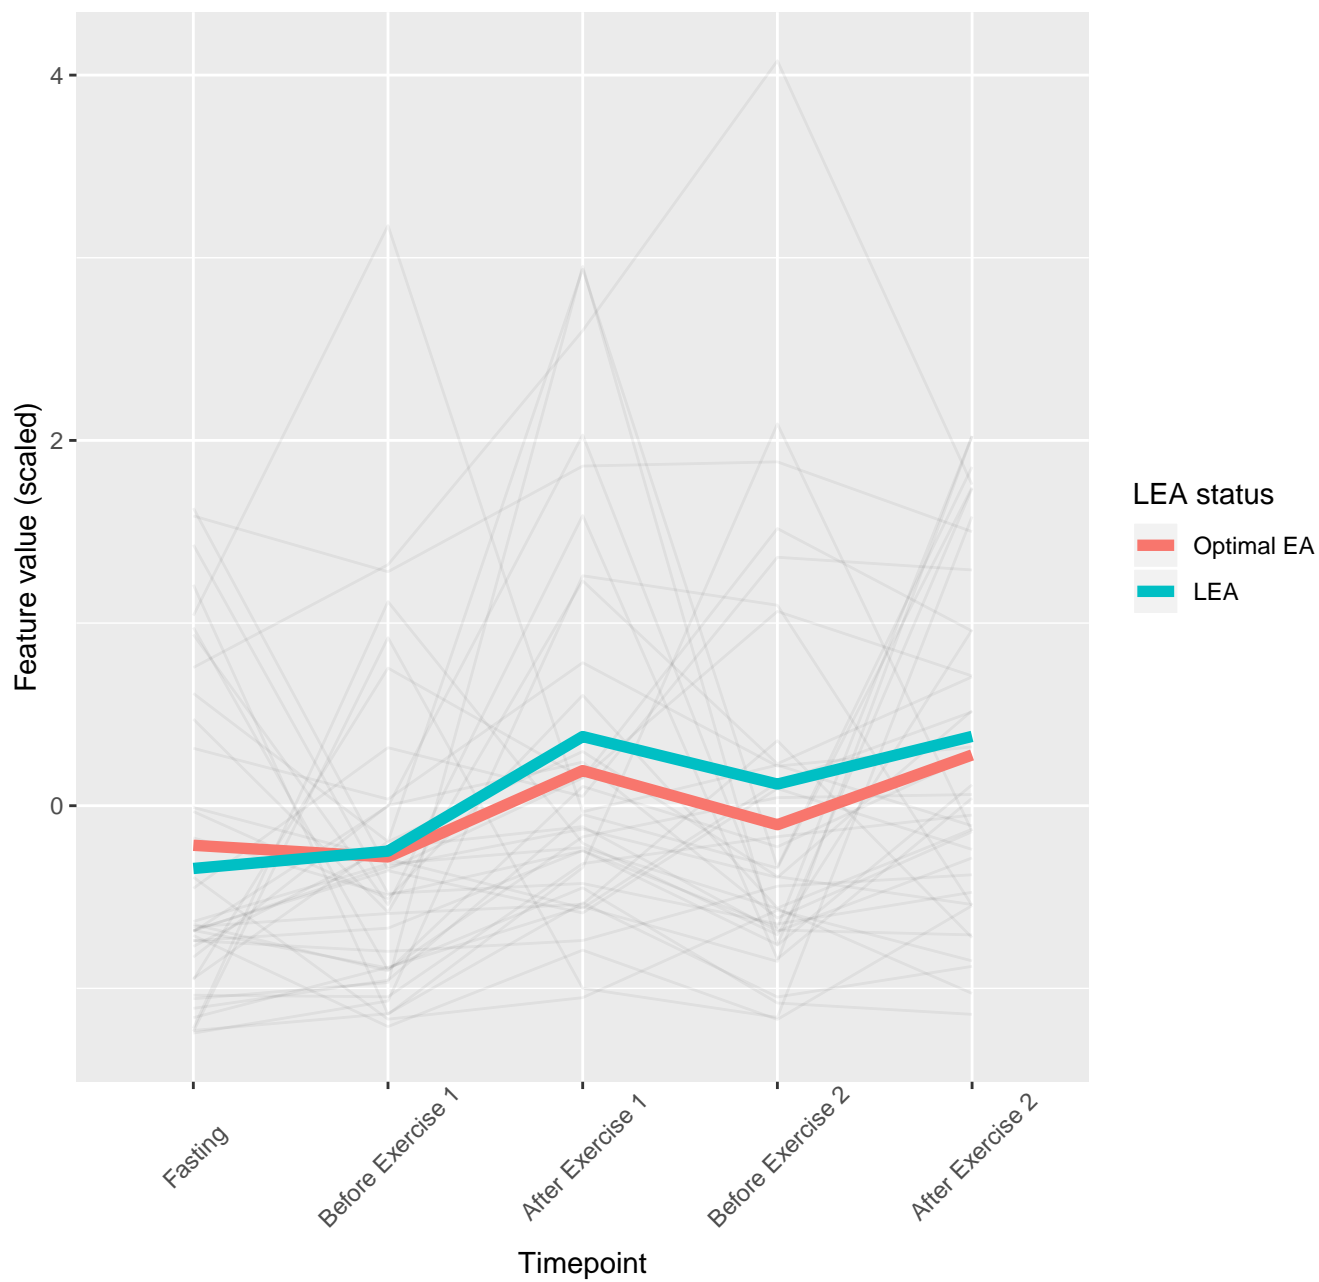

Line plot of TG(49:2)

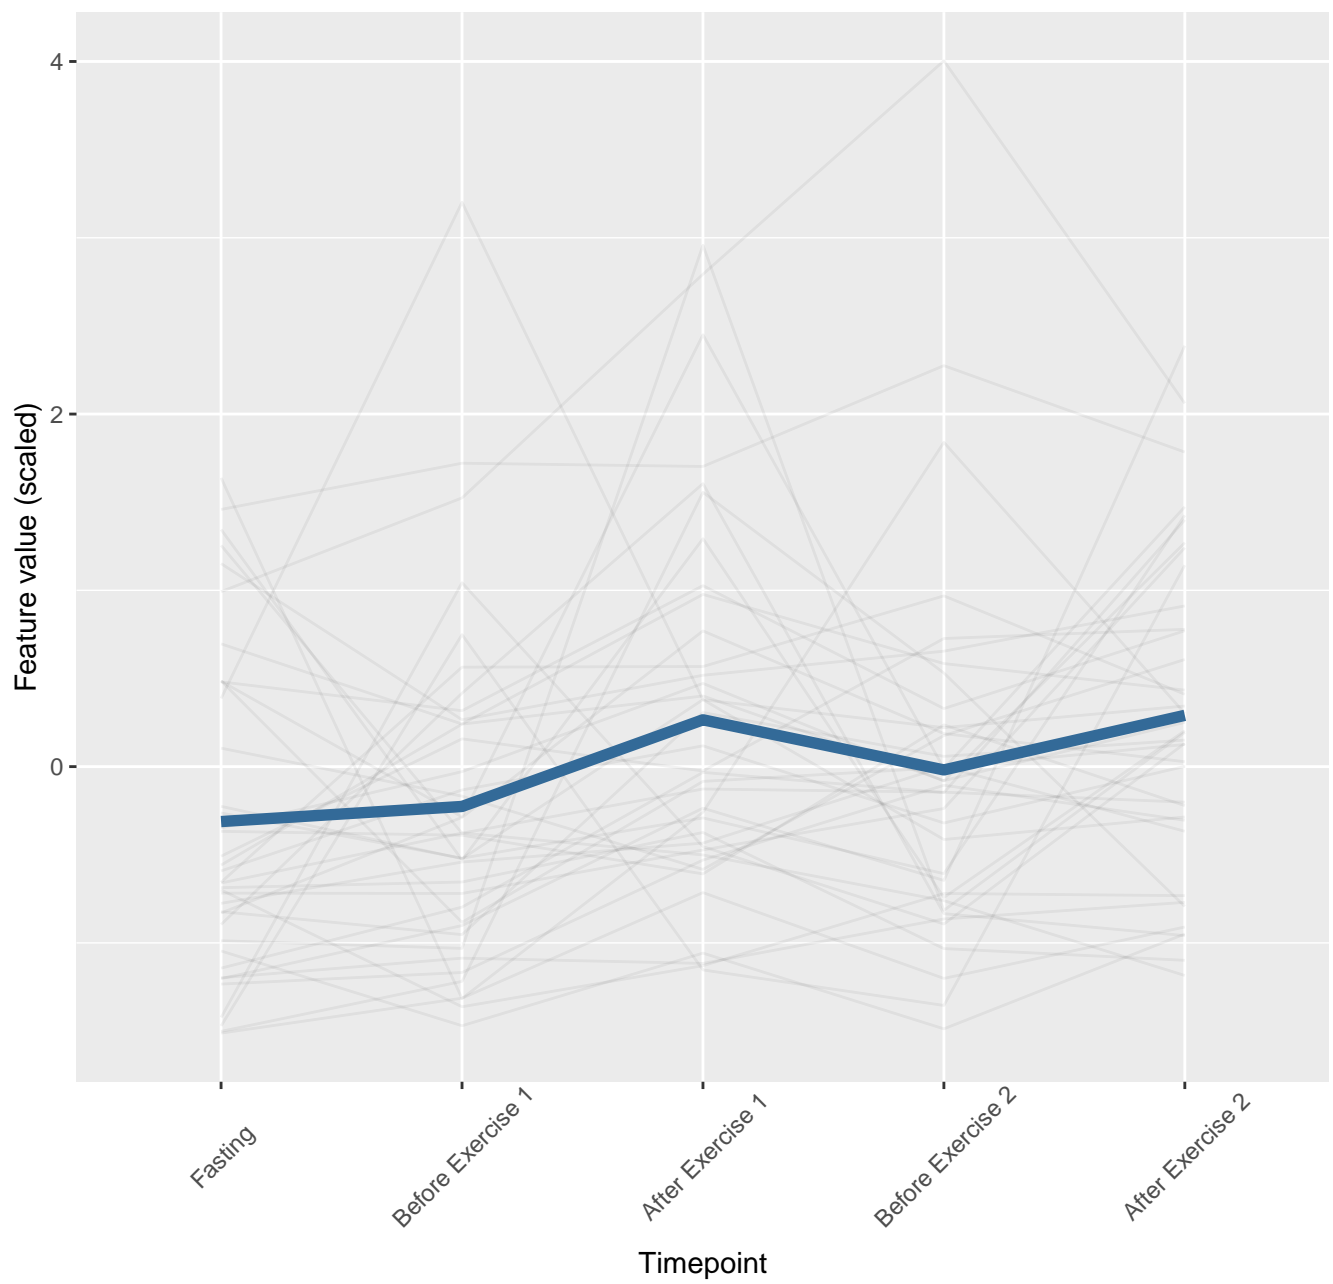



Line plot of TG(49:2)

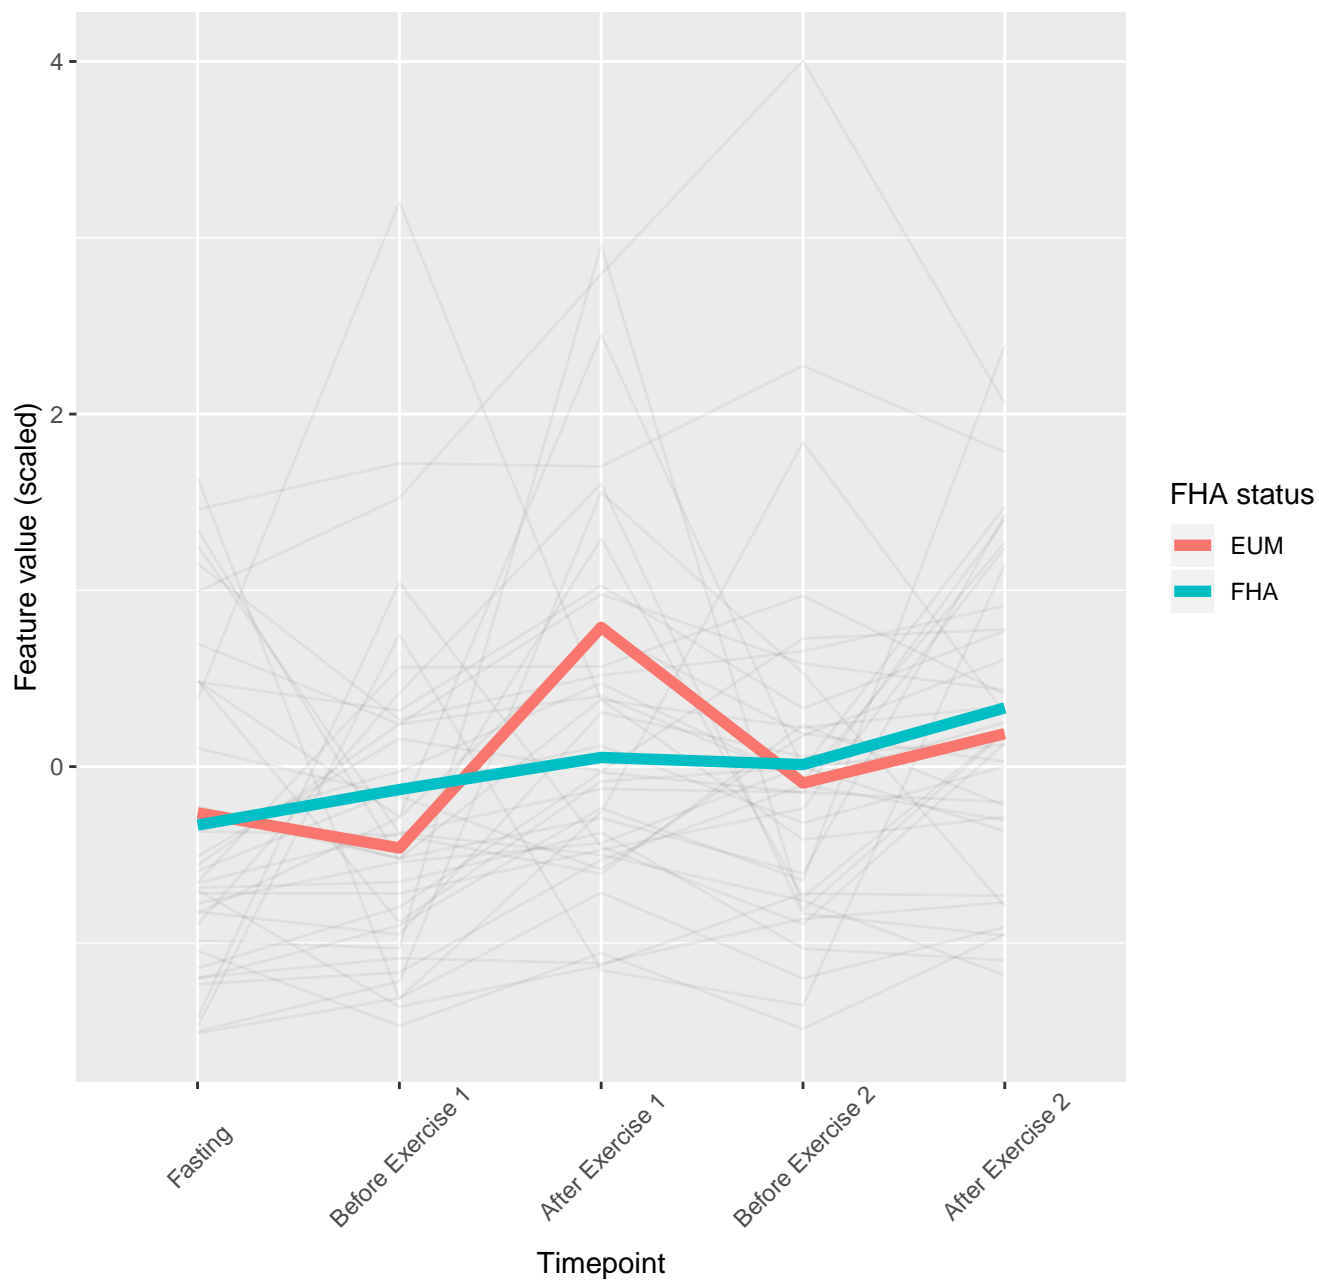

Line plot of TG(49:2)

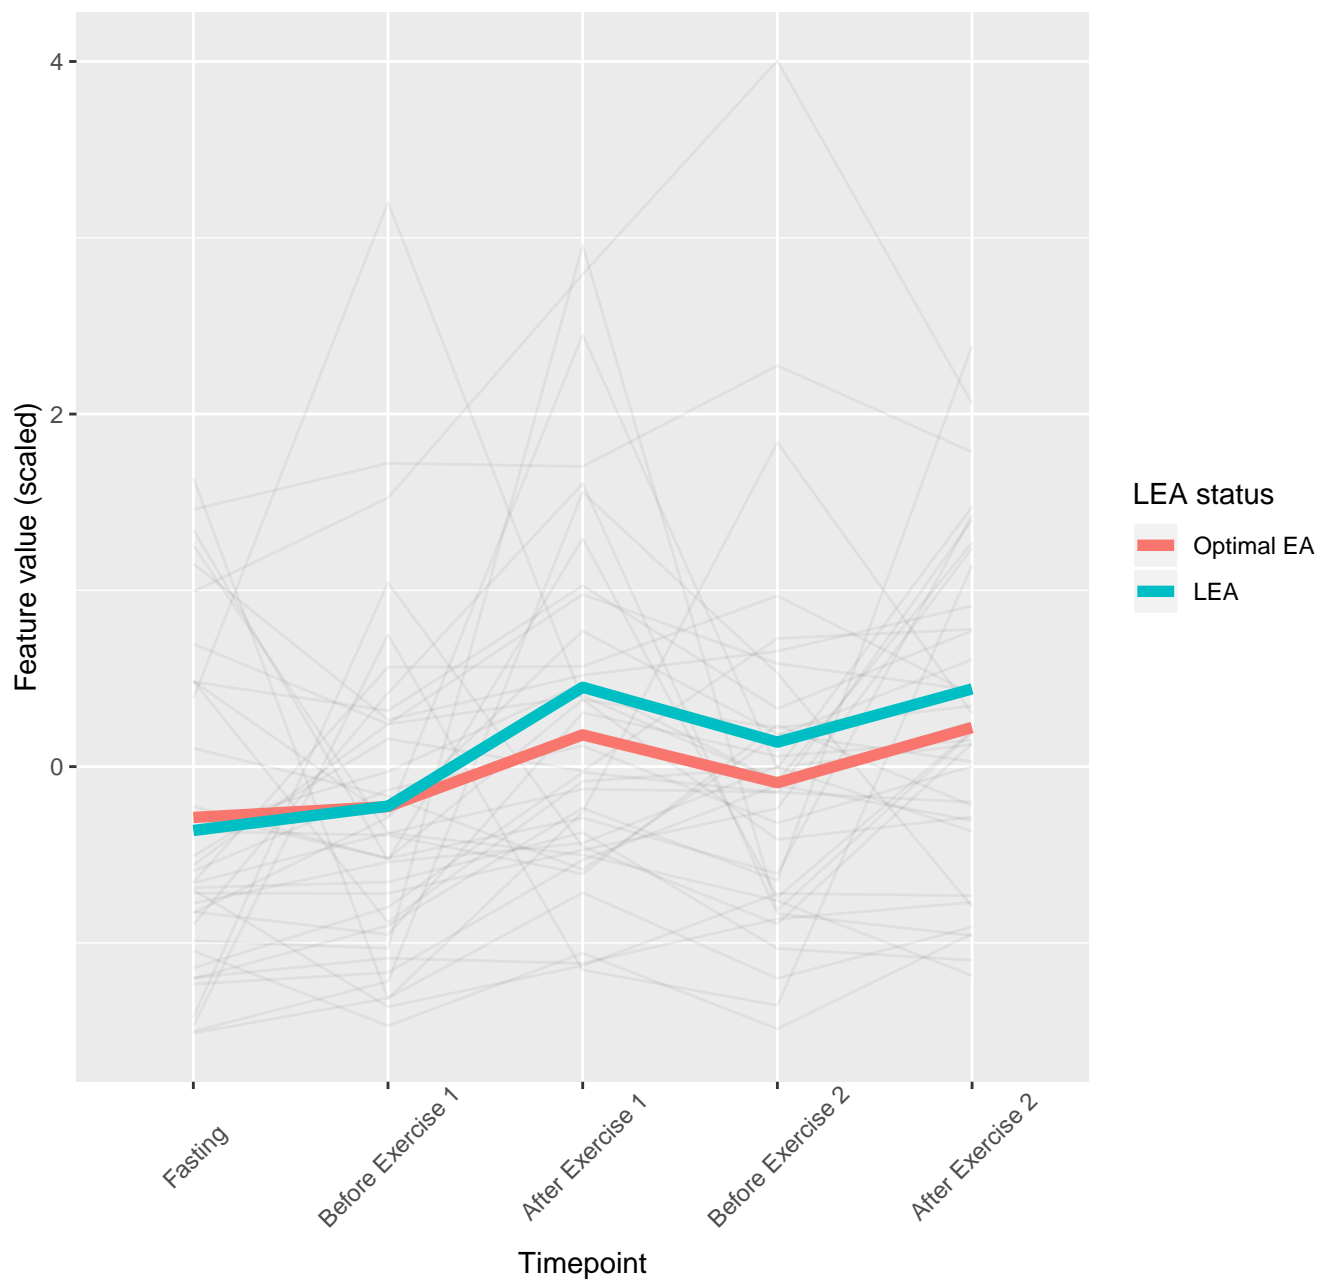

Line plot of TG(49:3)

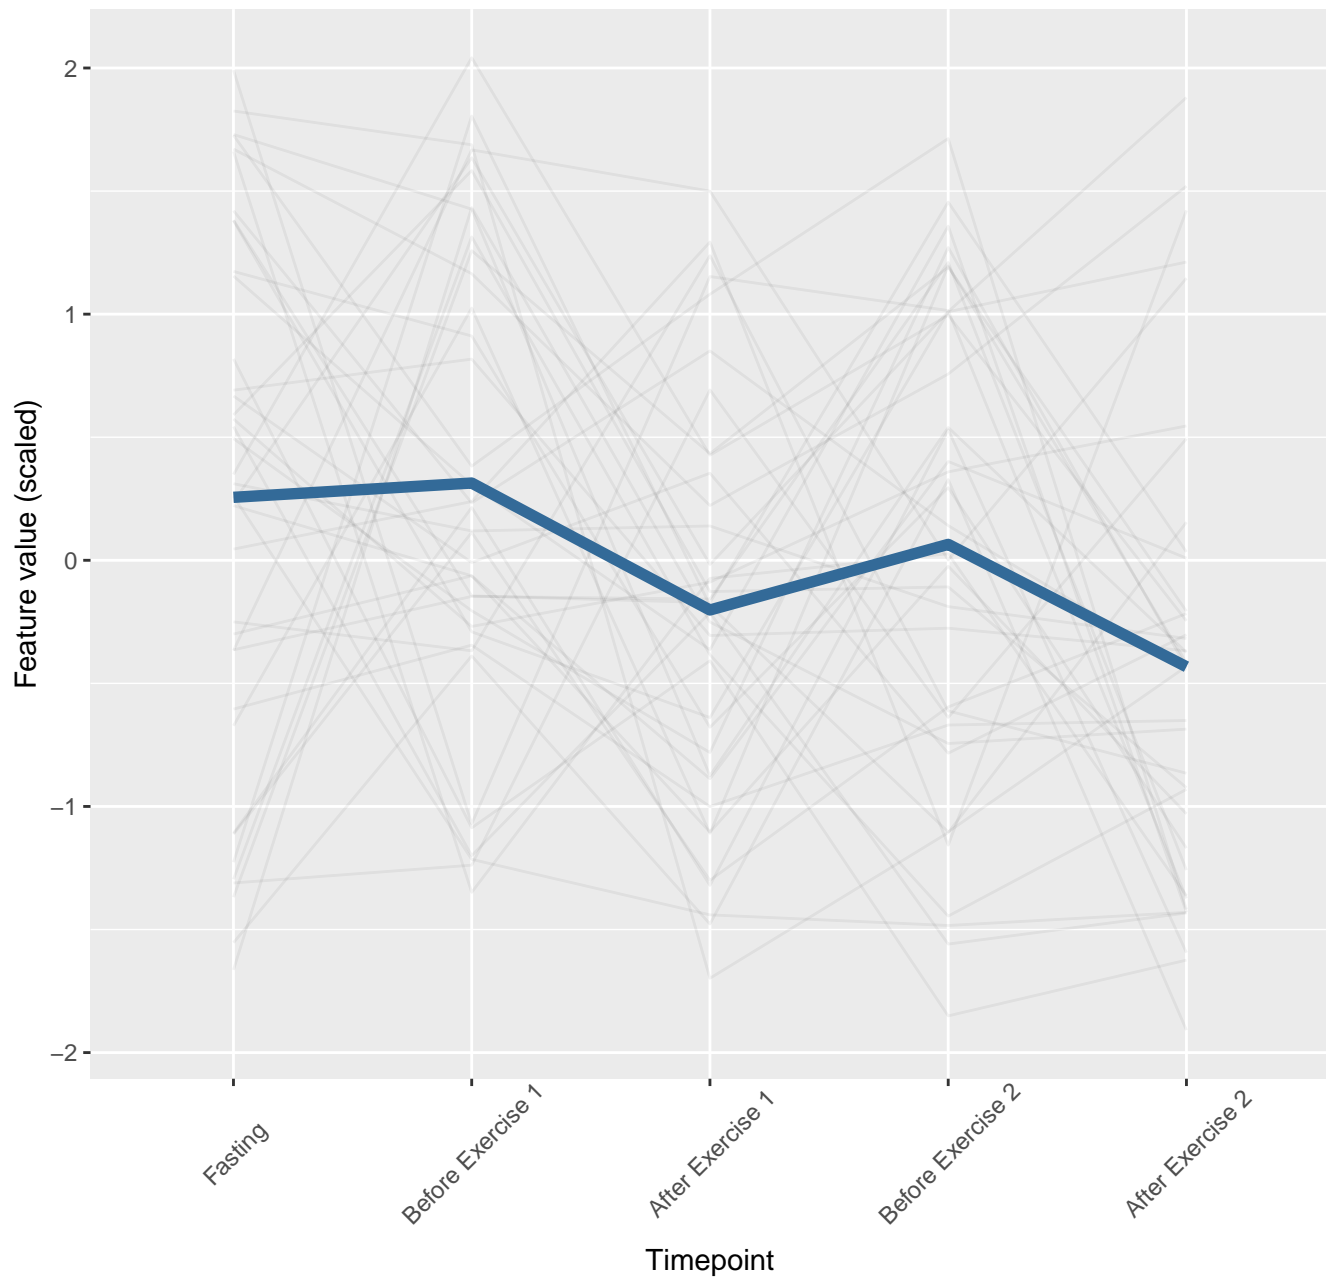

Line plot of TG(49:3)

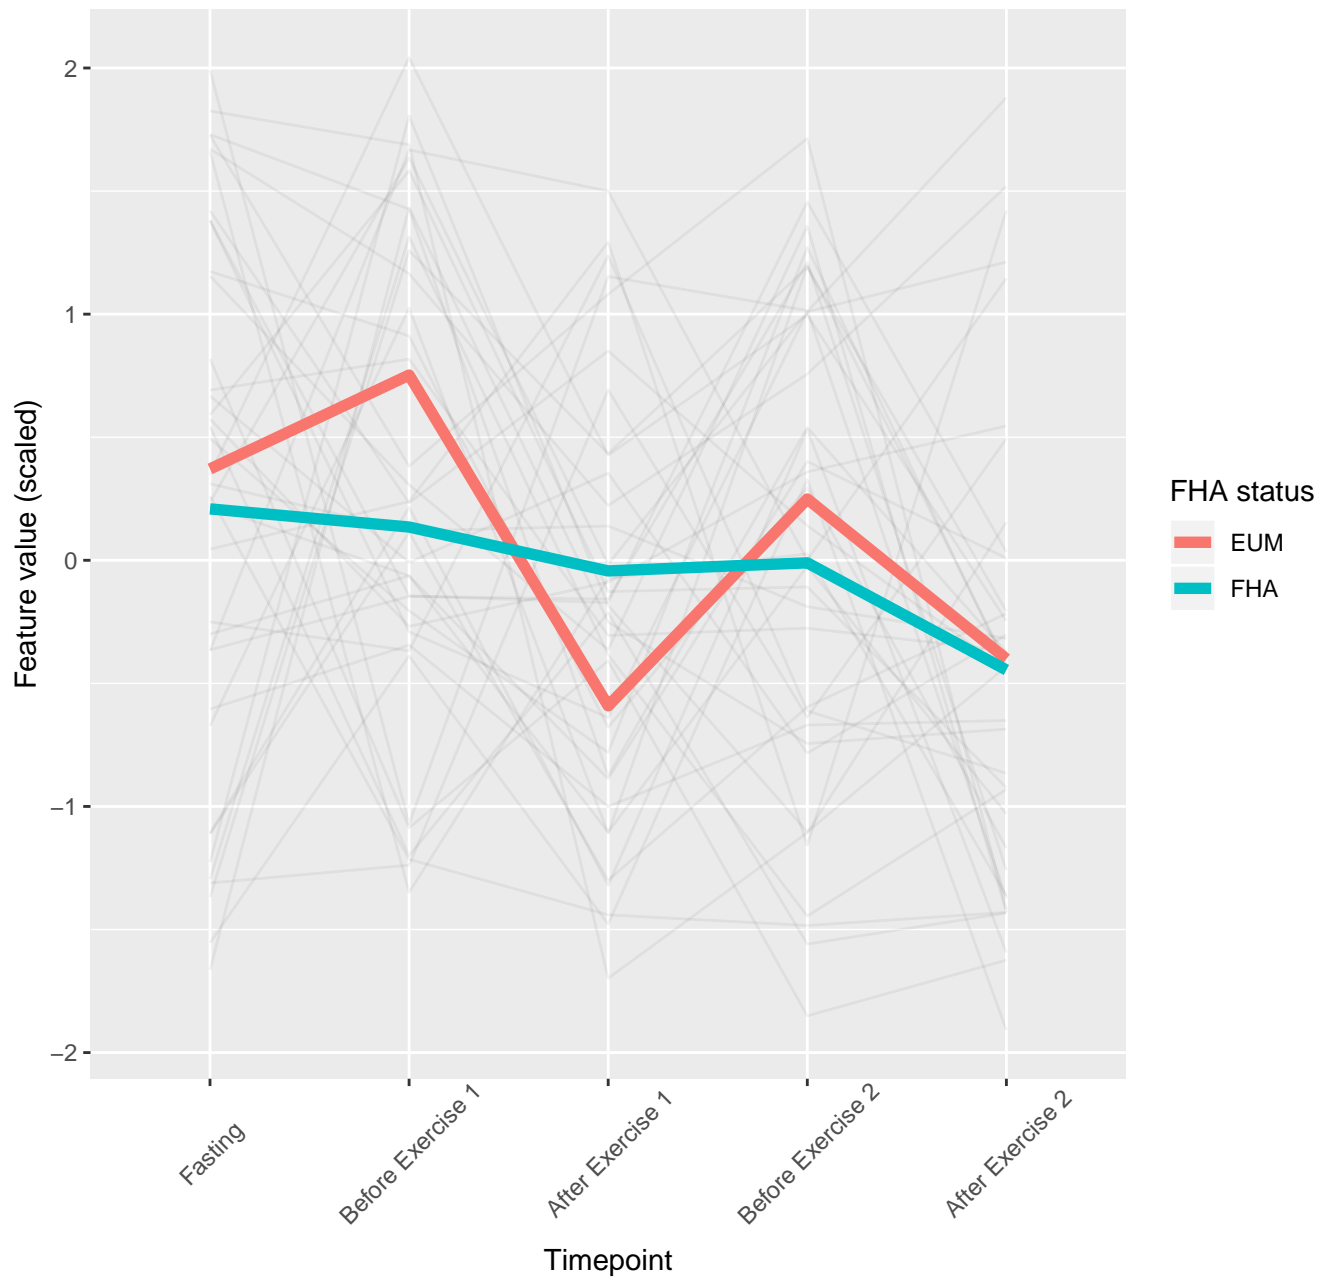

Line plot of TG(49:3)

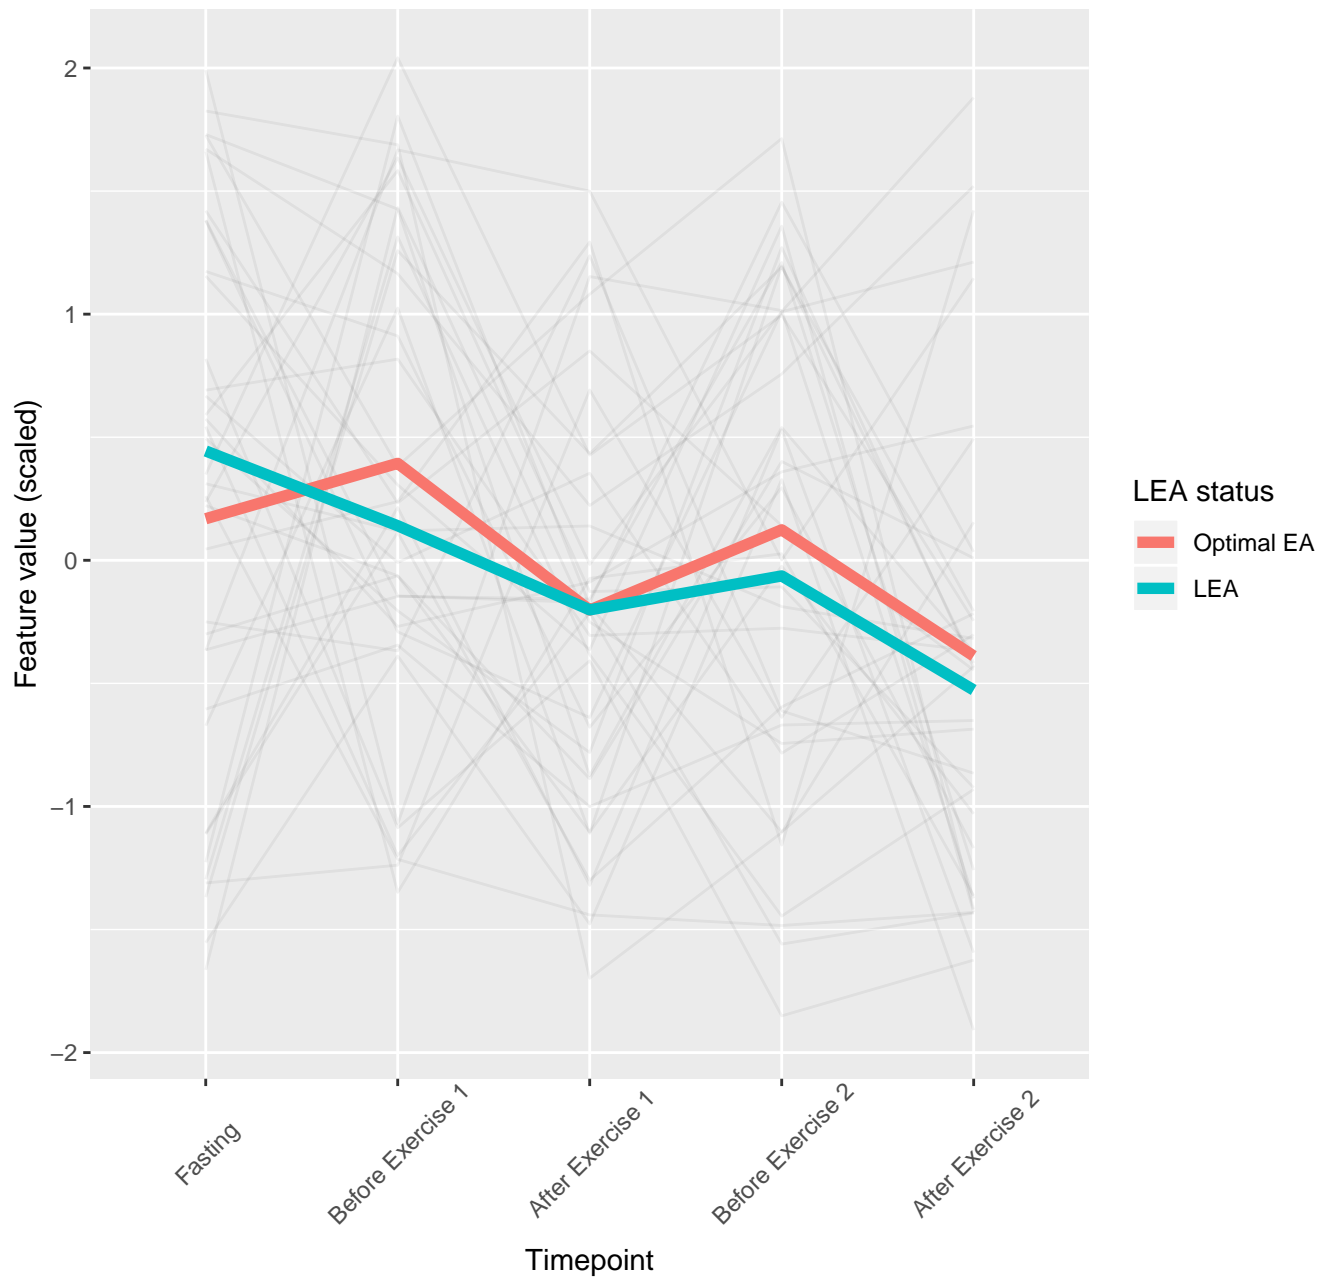

Line plot of TG(50:0)

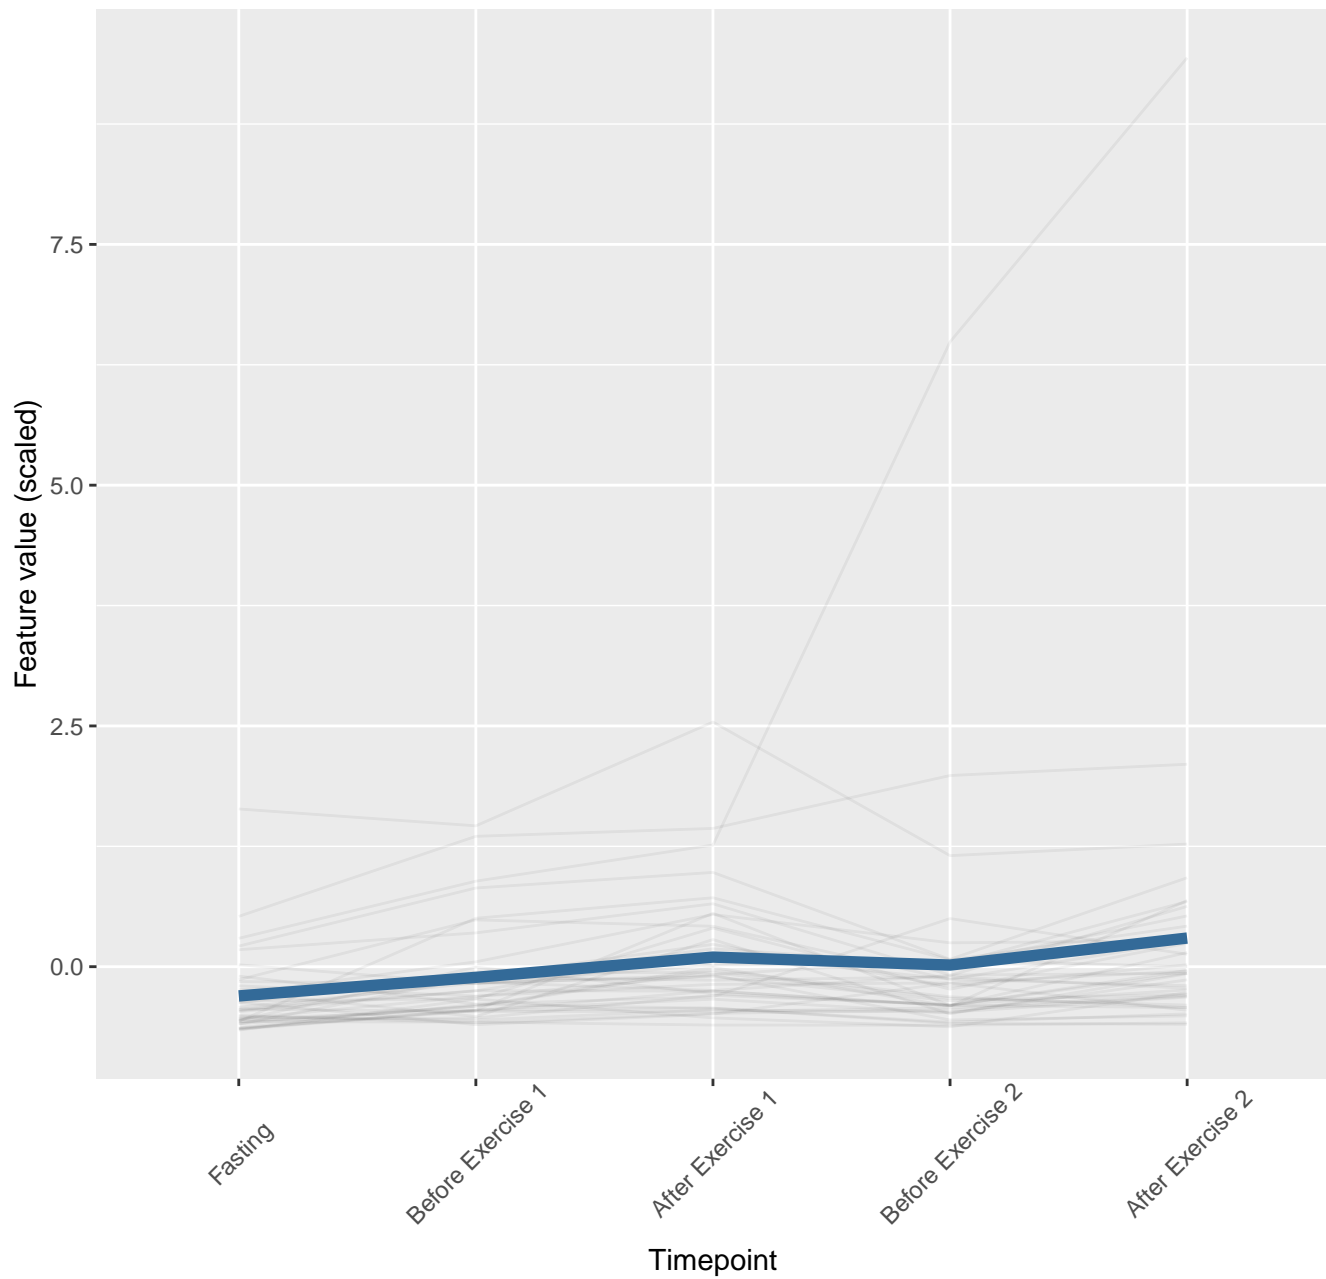

Line plot of TG(50:0)

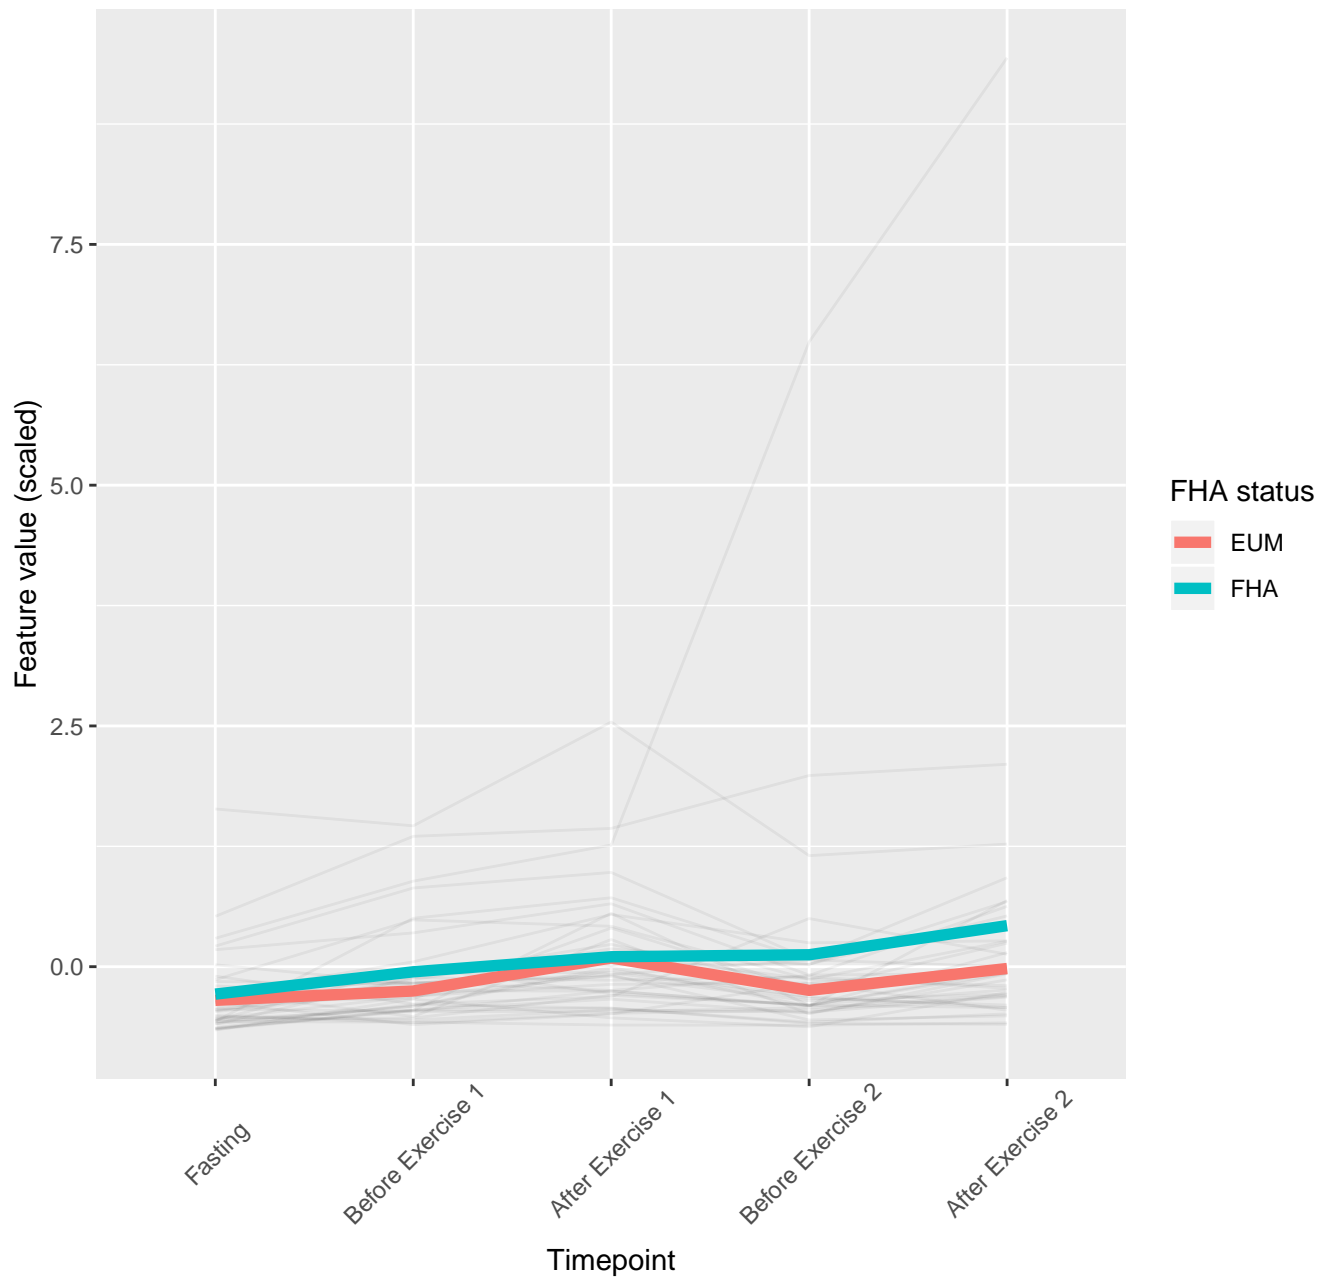

Line plot of TG(50:0)

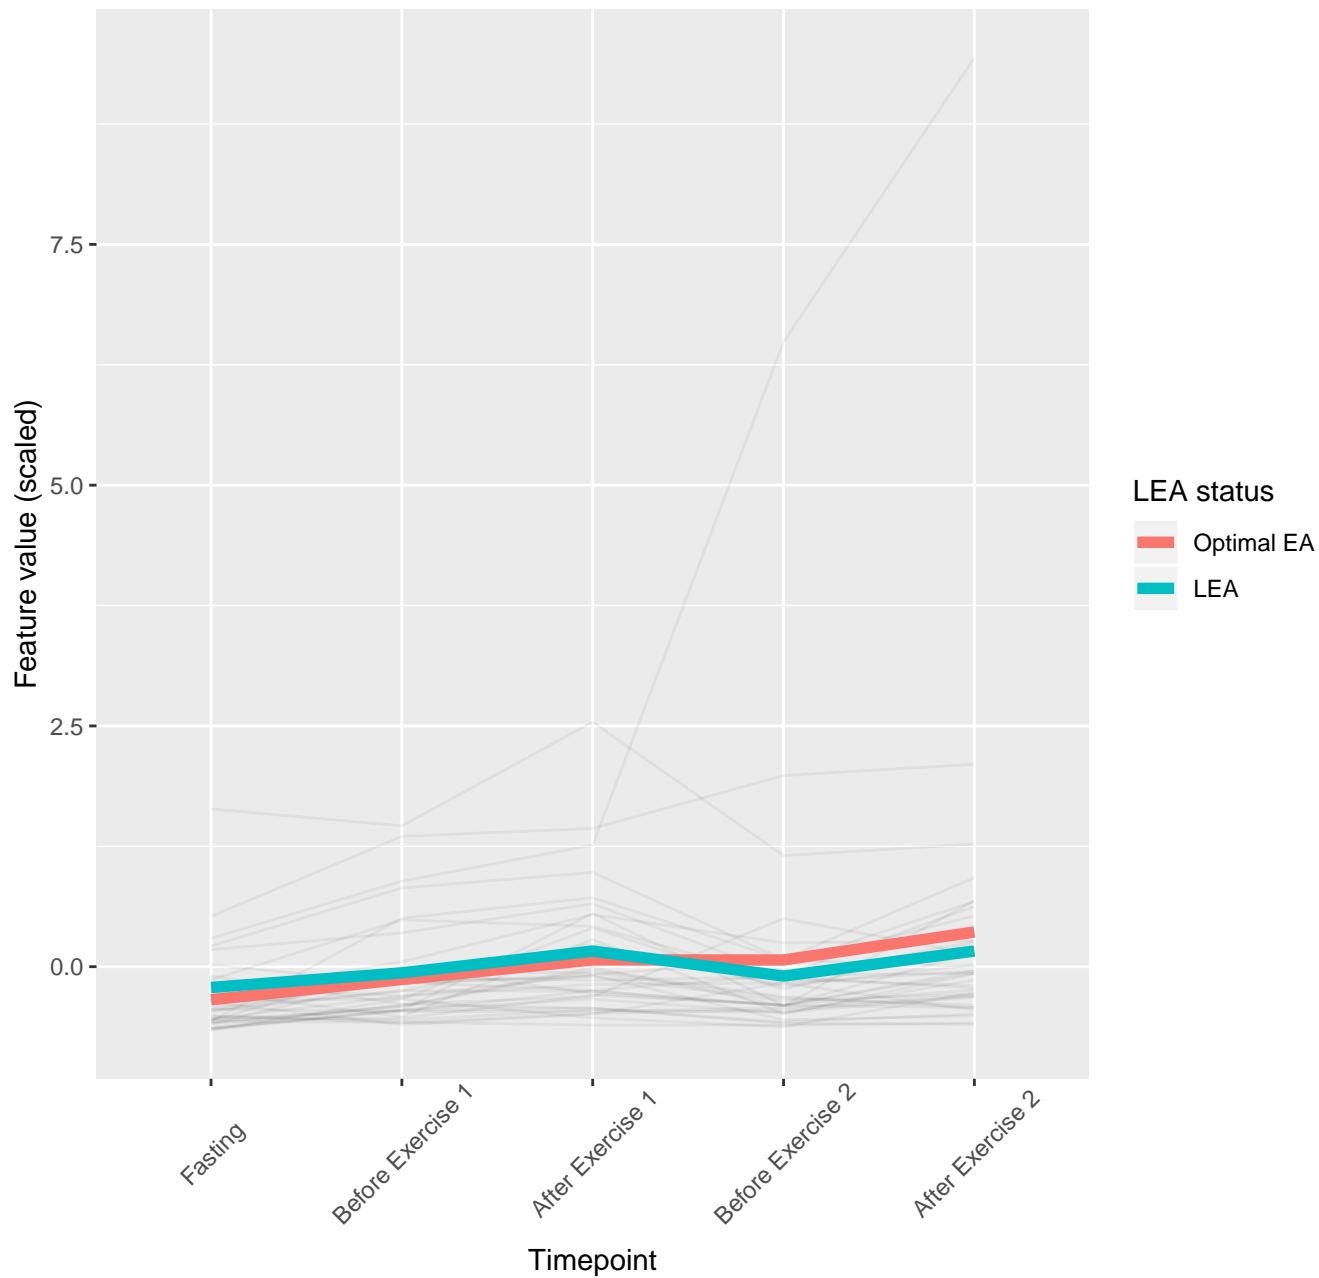



Line plot of TG(50:0).1

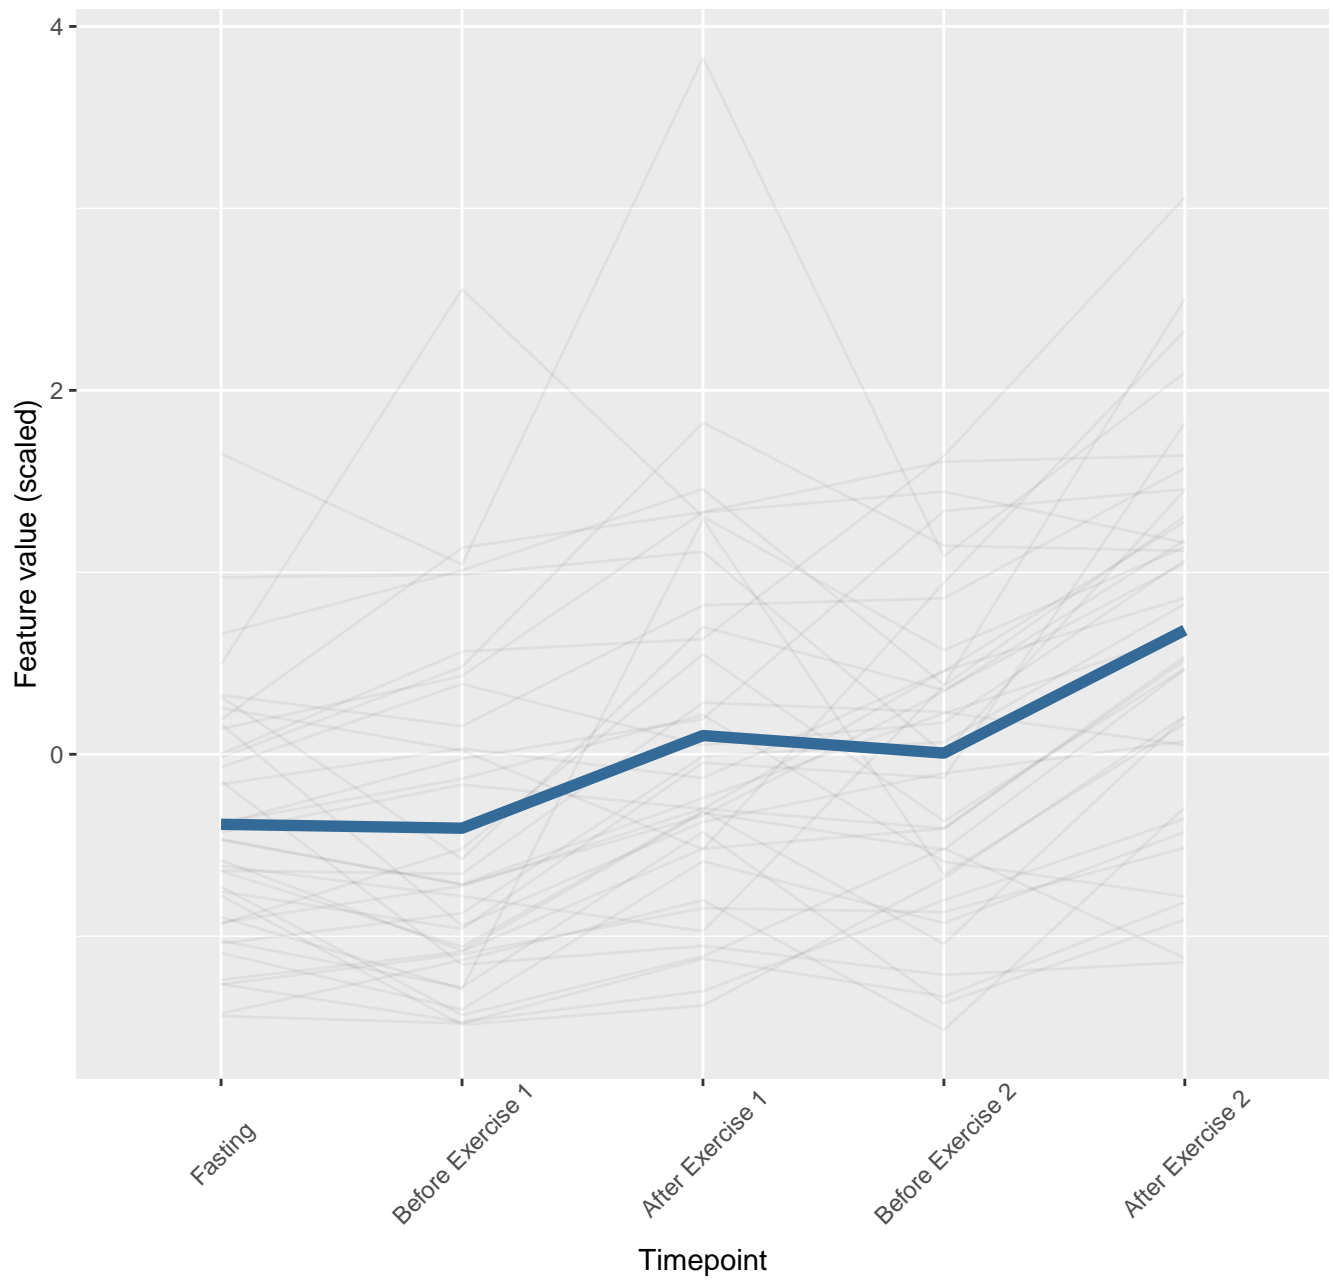

Line plot of TG(50:0).1

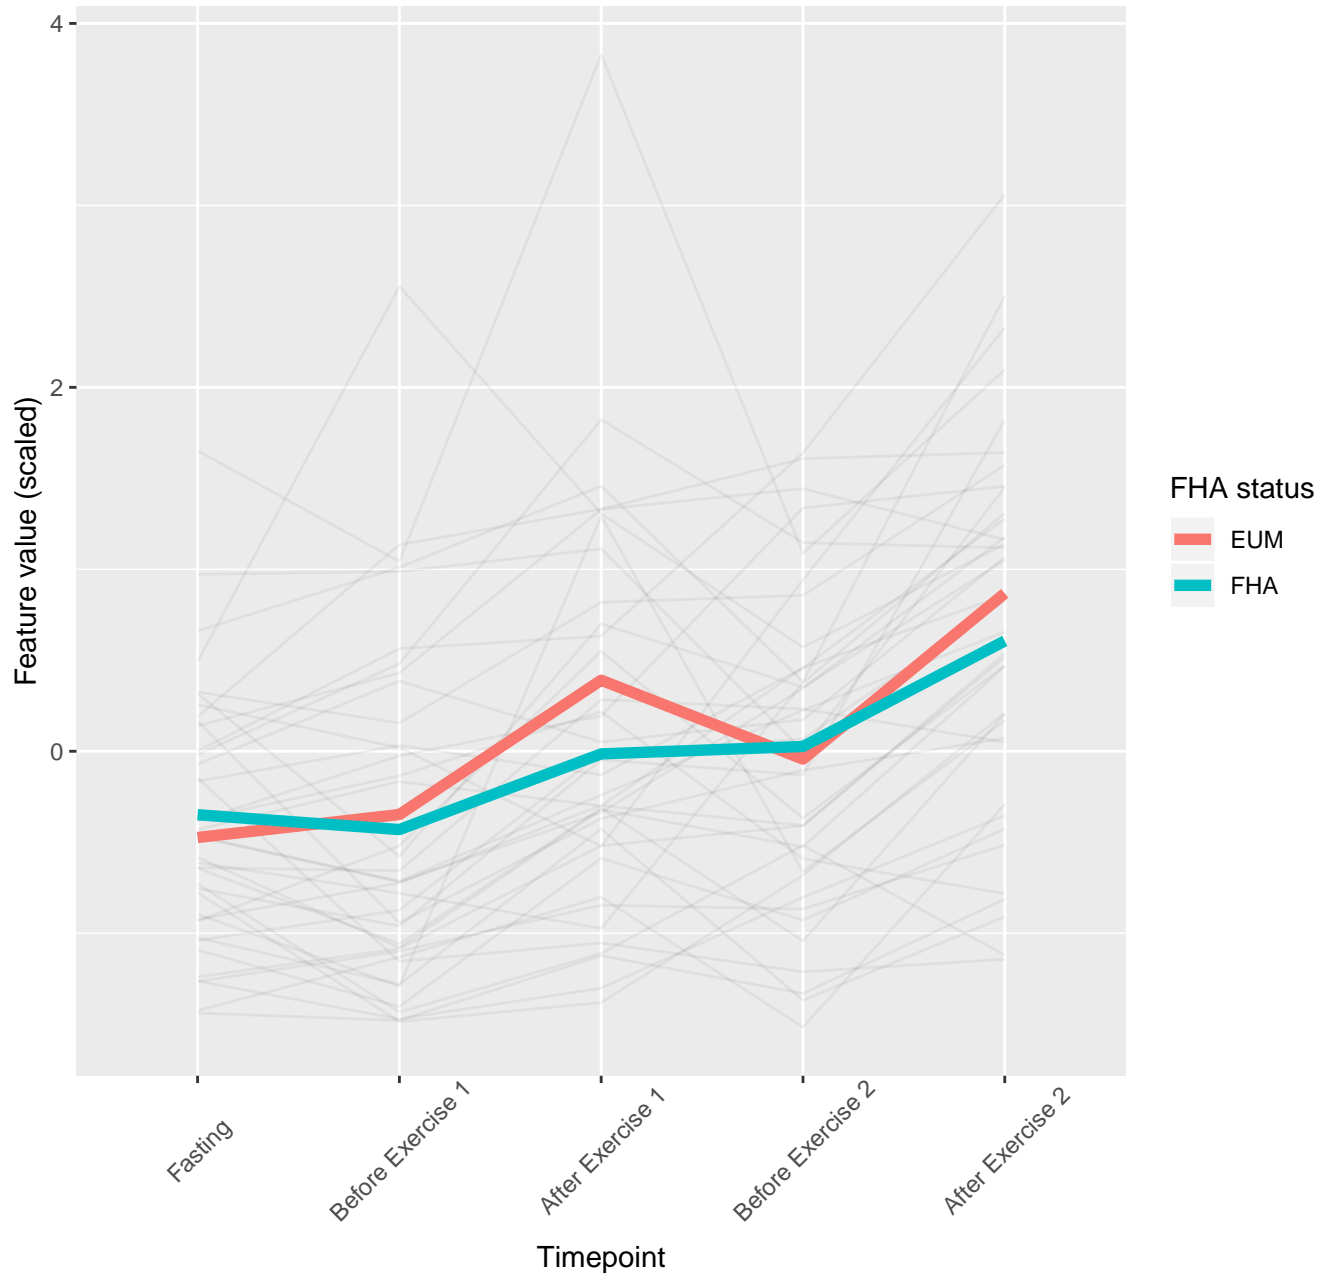

Line plot of TG(50:0).1

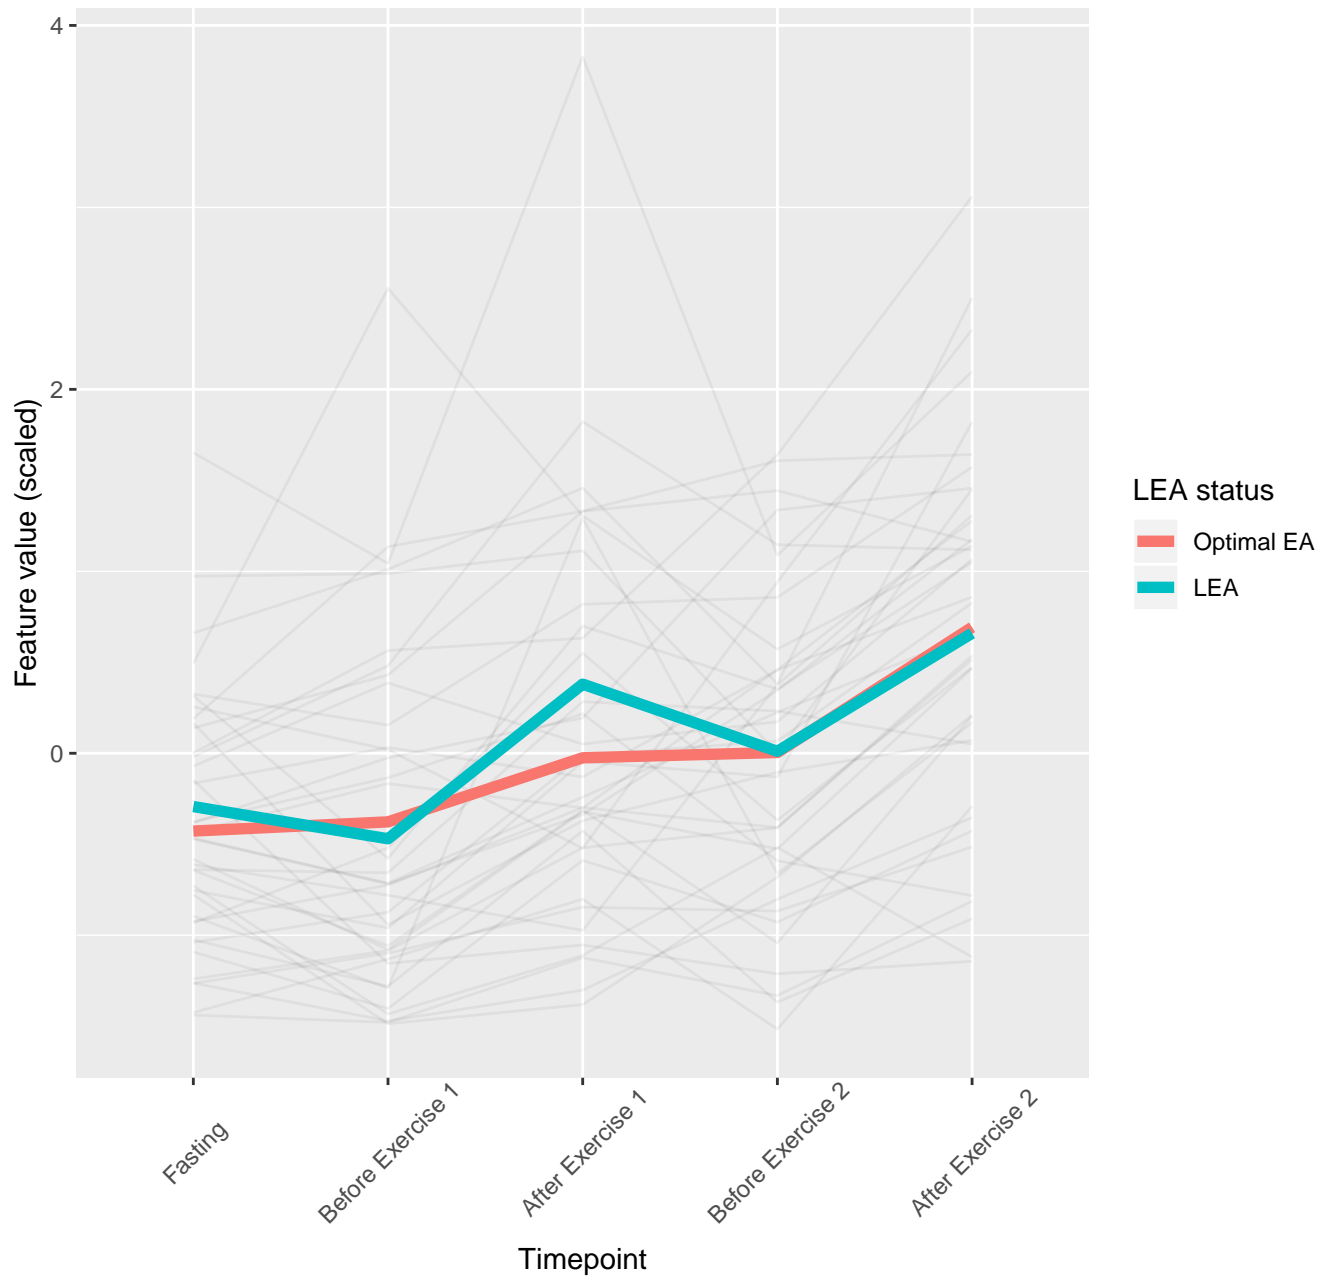

Line plot of TG(50:1)

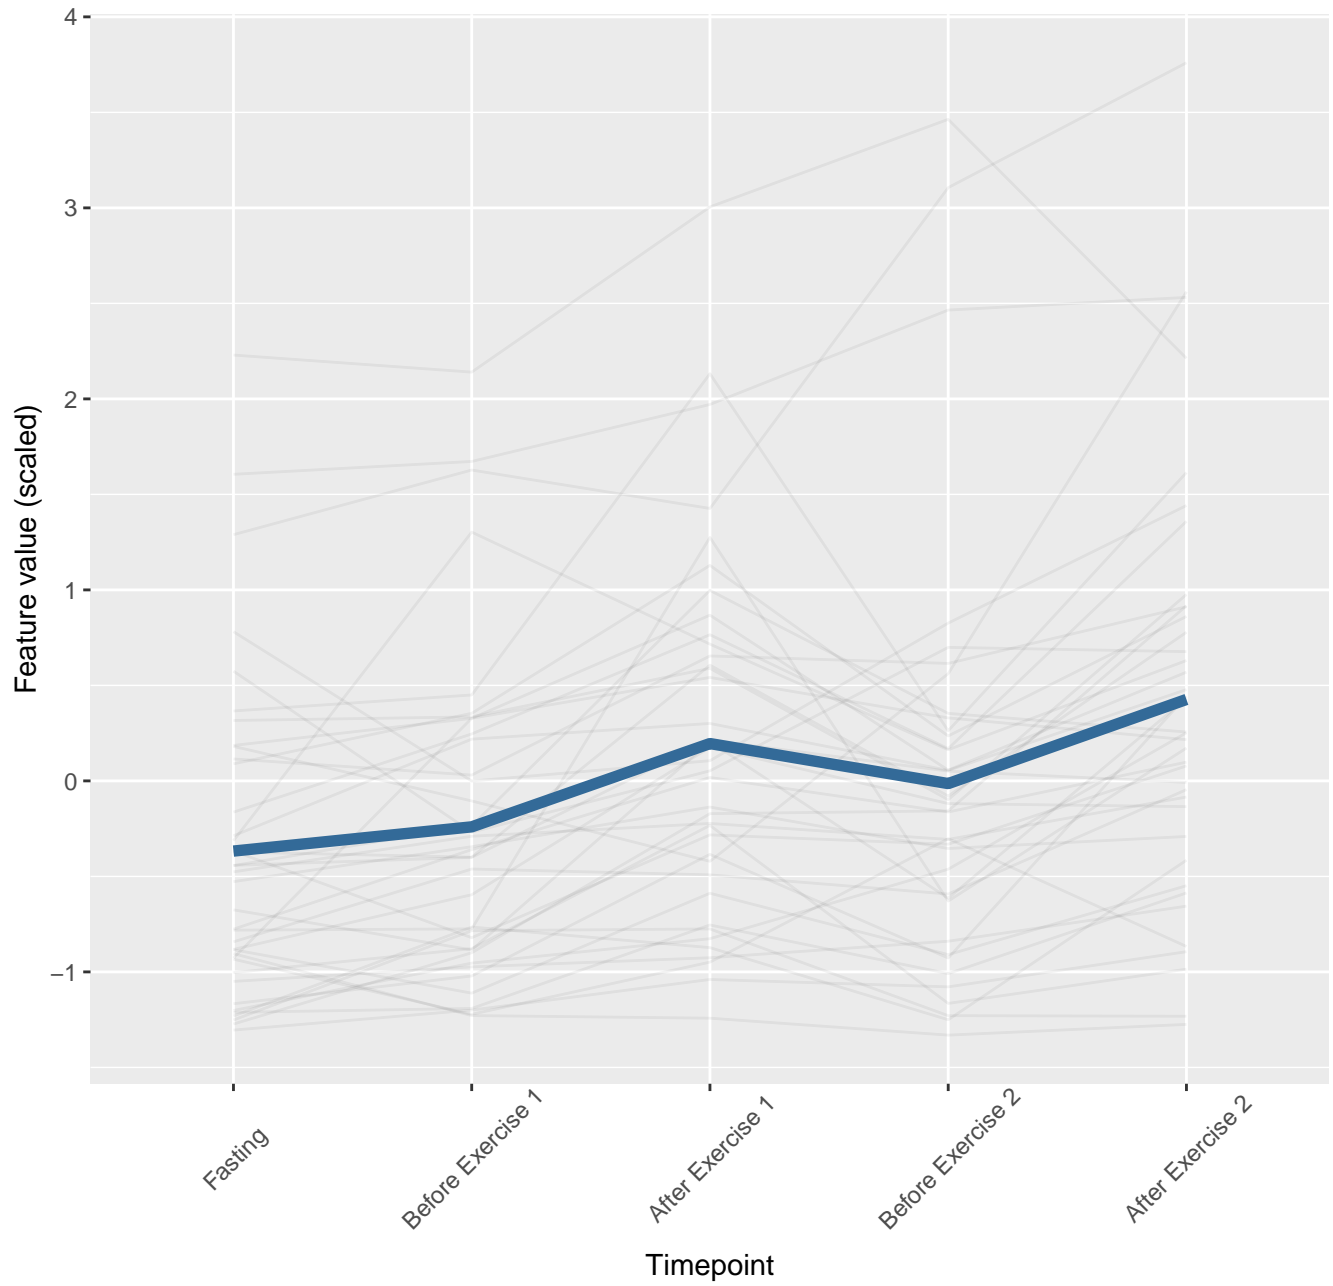

Line plot of TG(50:1)

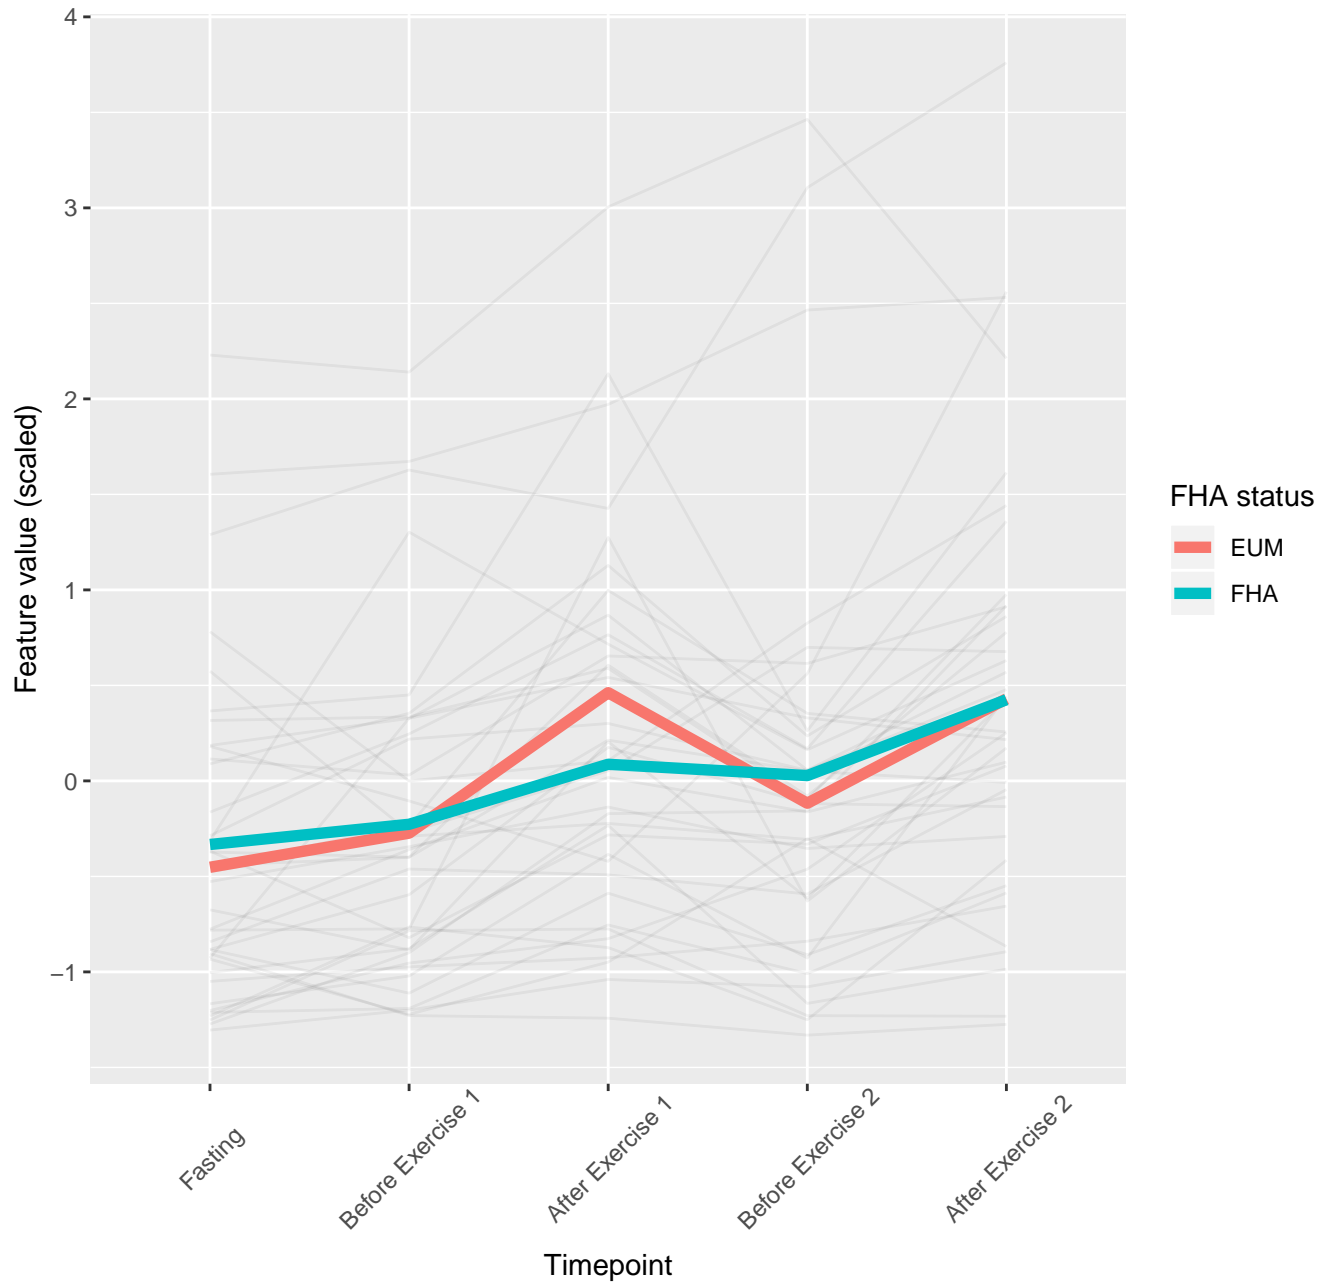

Line plot of TG(50:1)

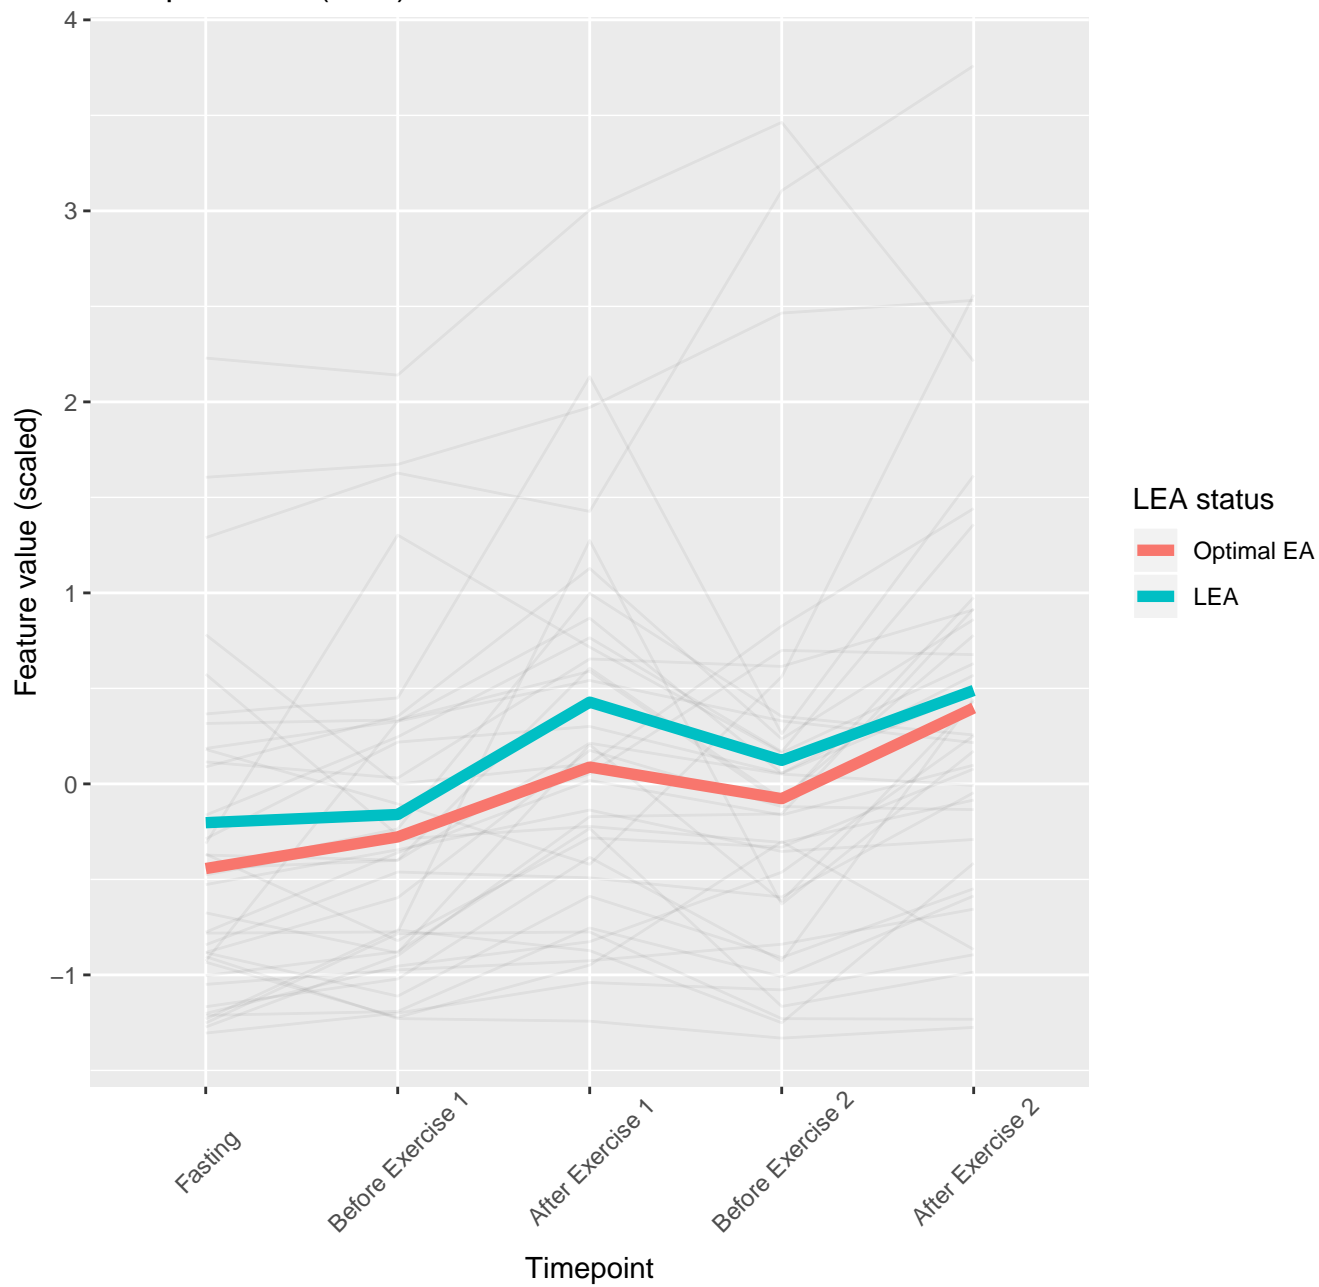

Line plot of TG(50:2)

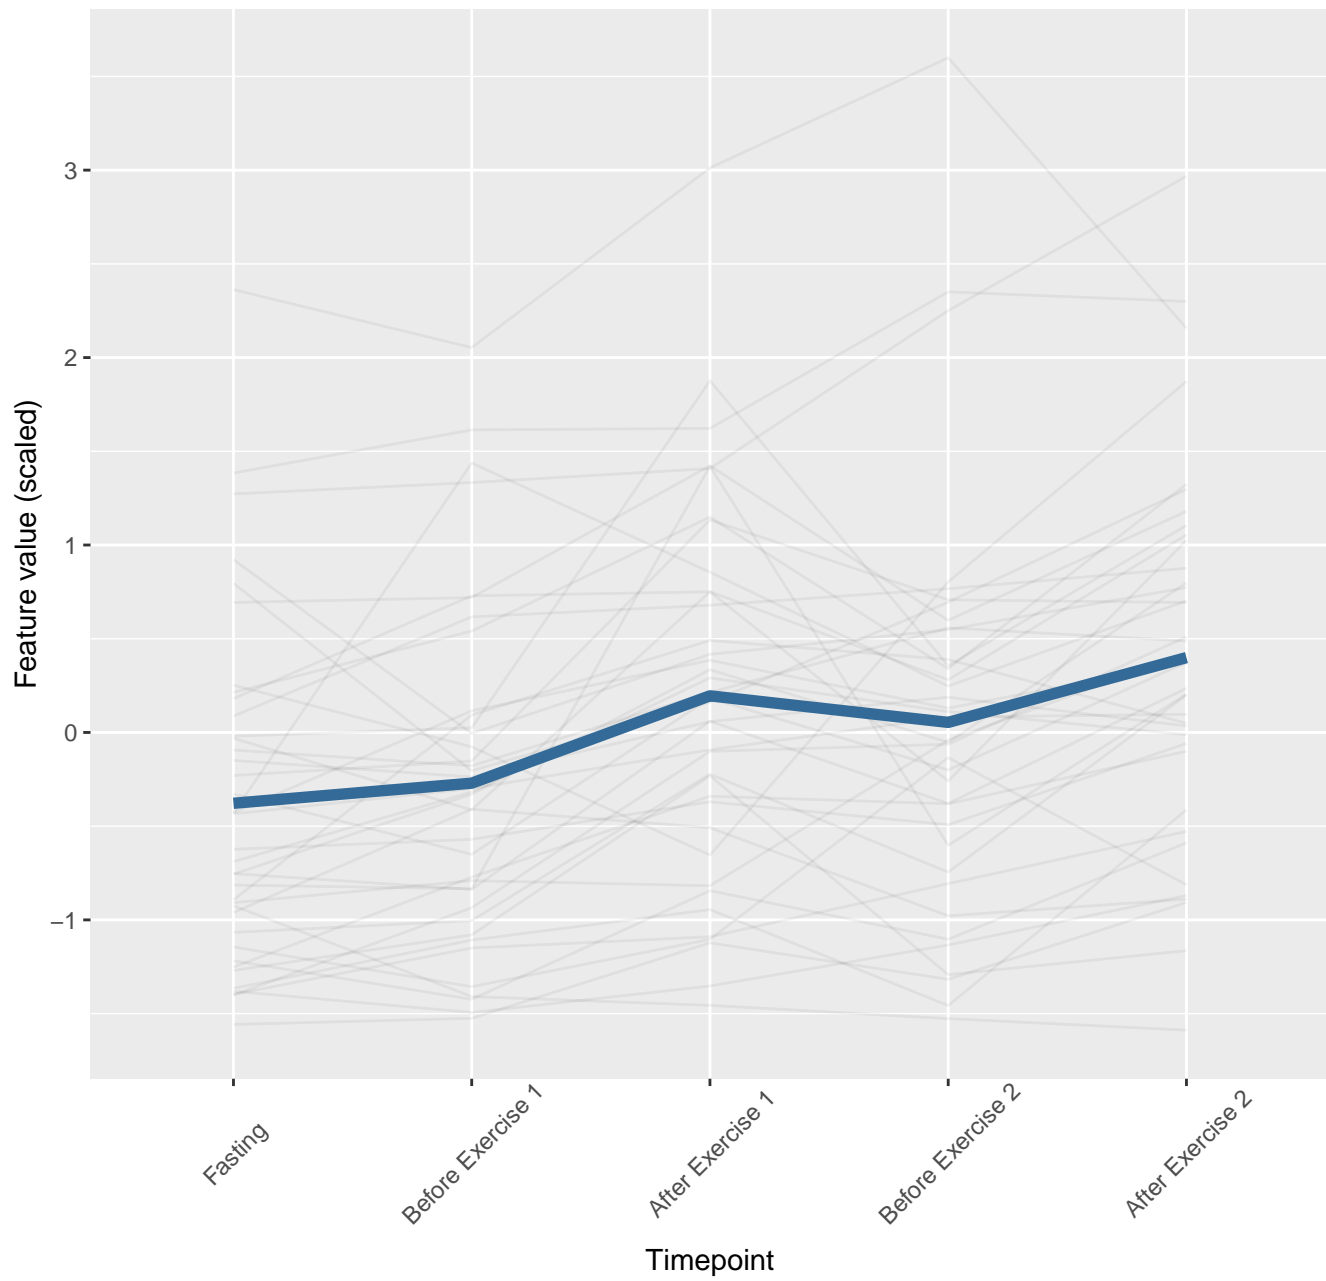

Line plot of TG(50:2)

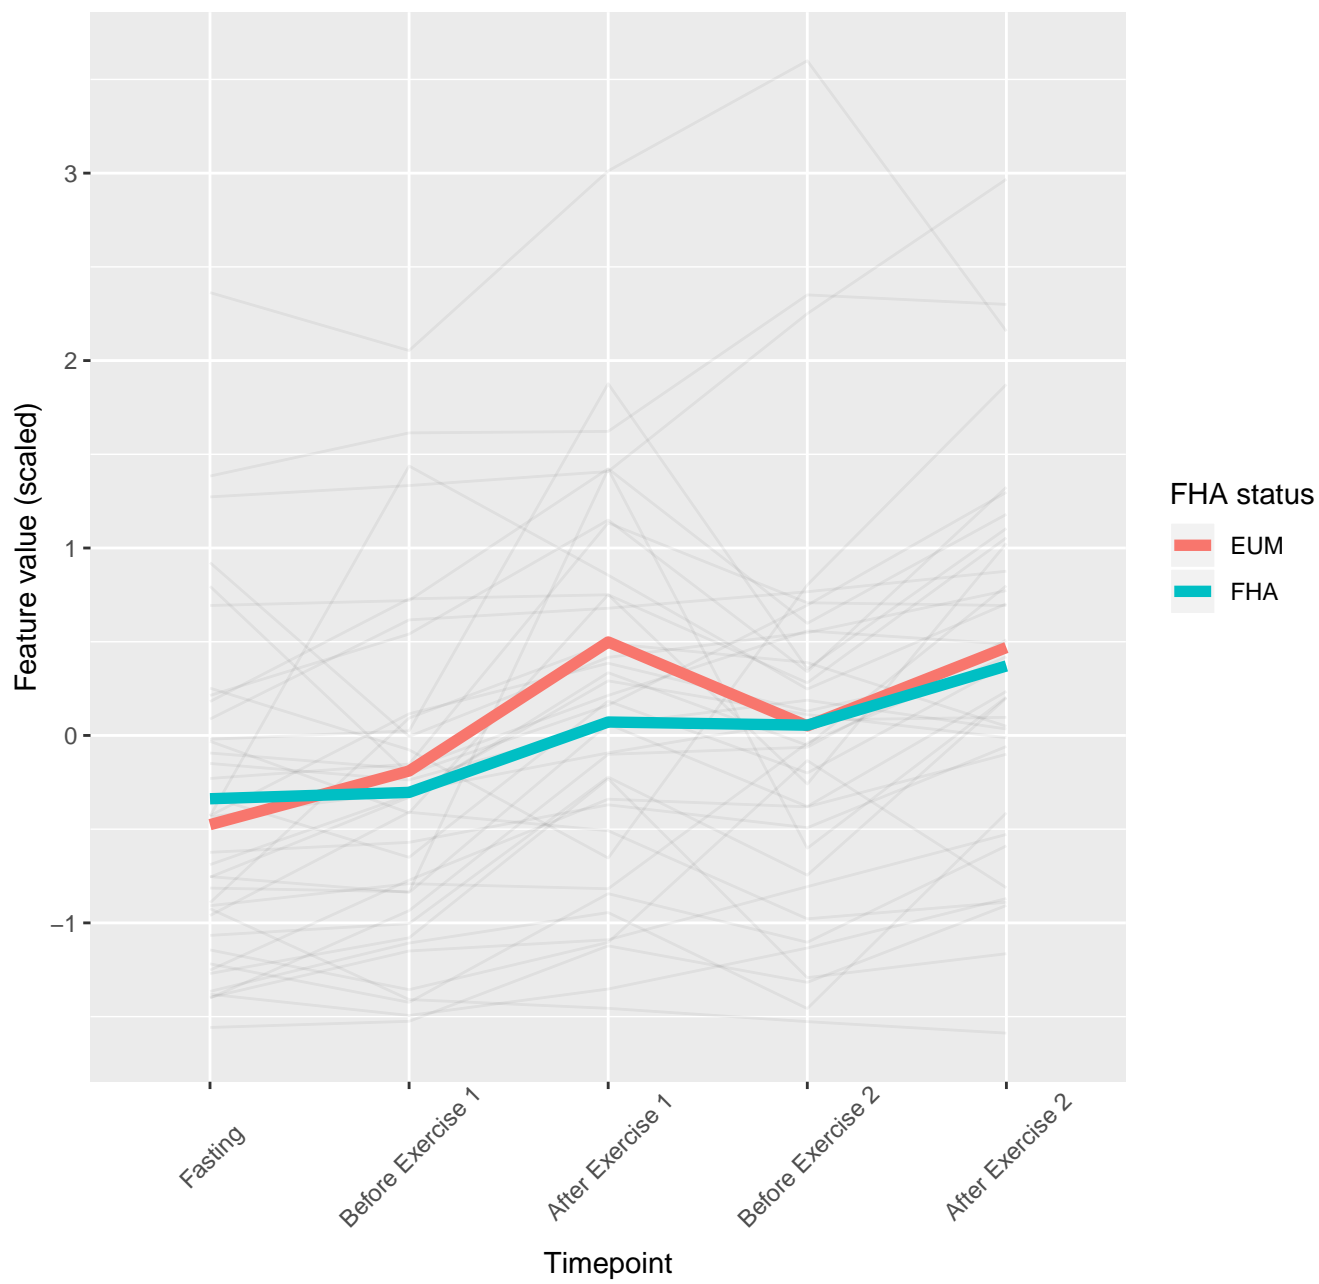



Line plot of TG(50:2)

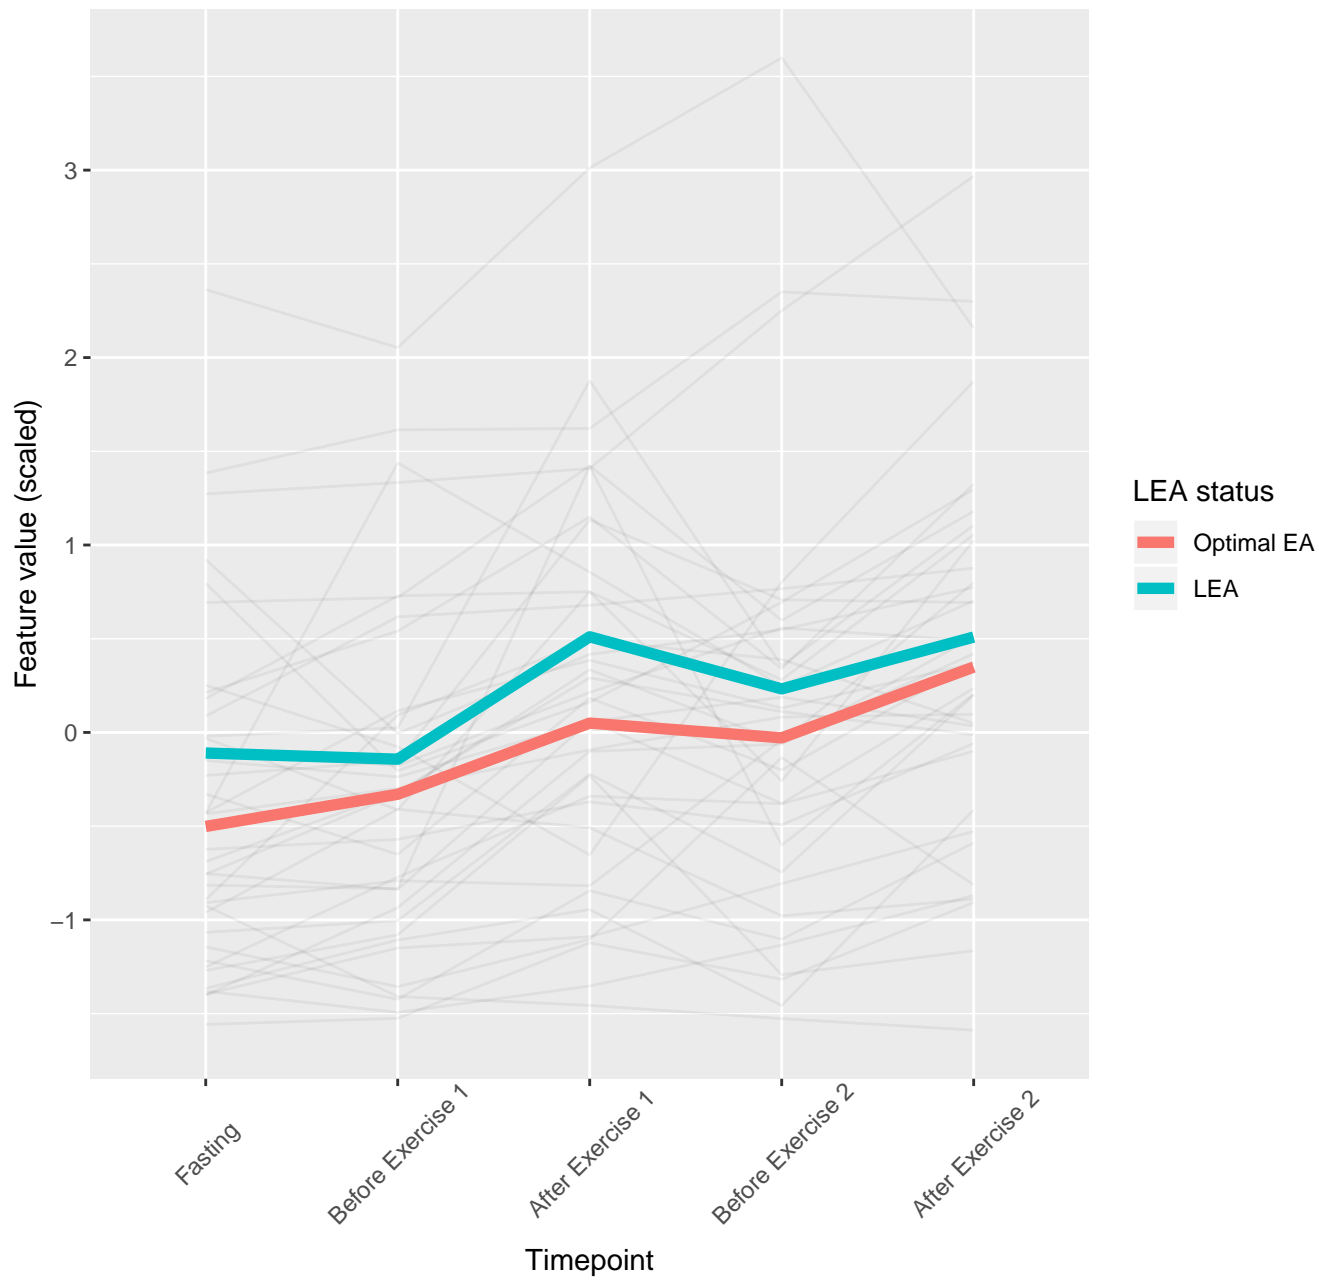

Line plot of TG(50:3)

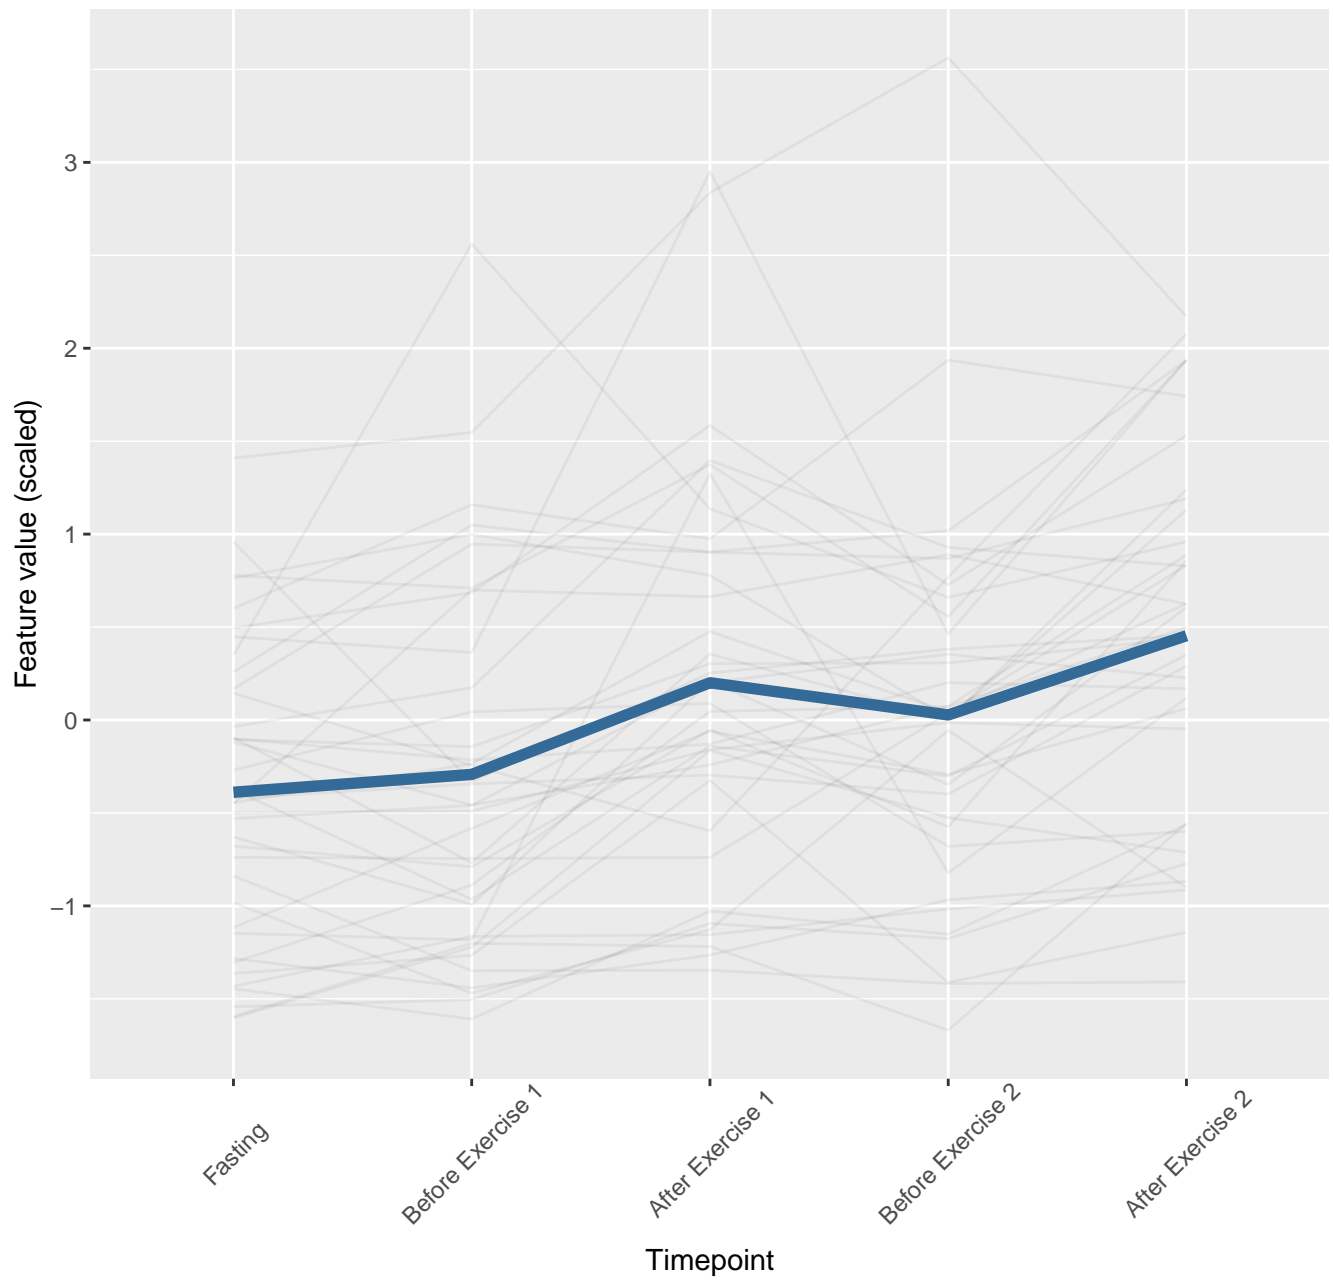

Line plot of TG(50:3)

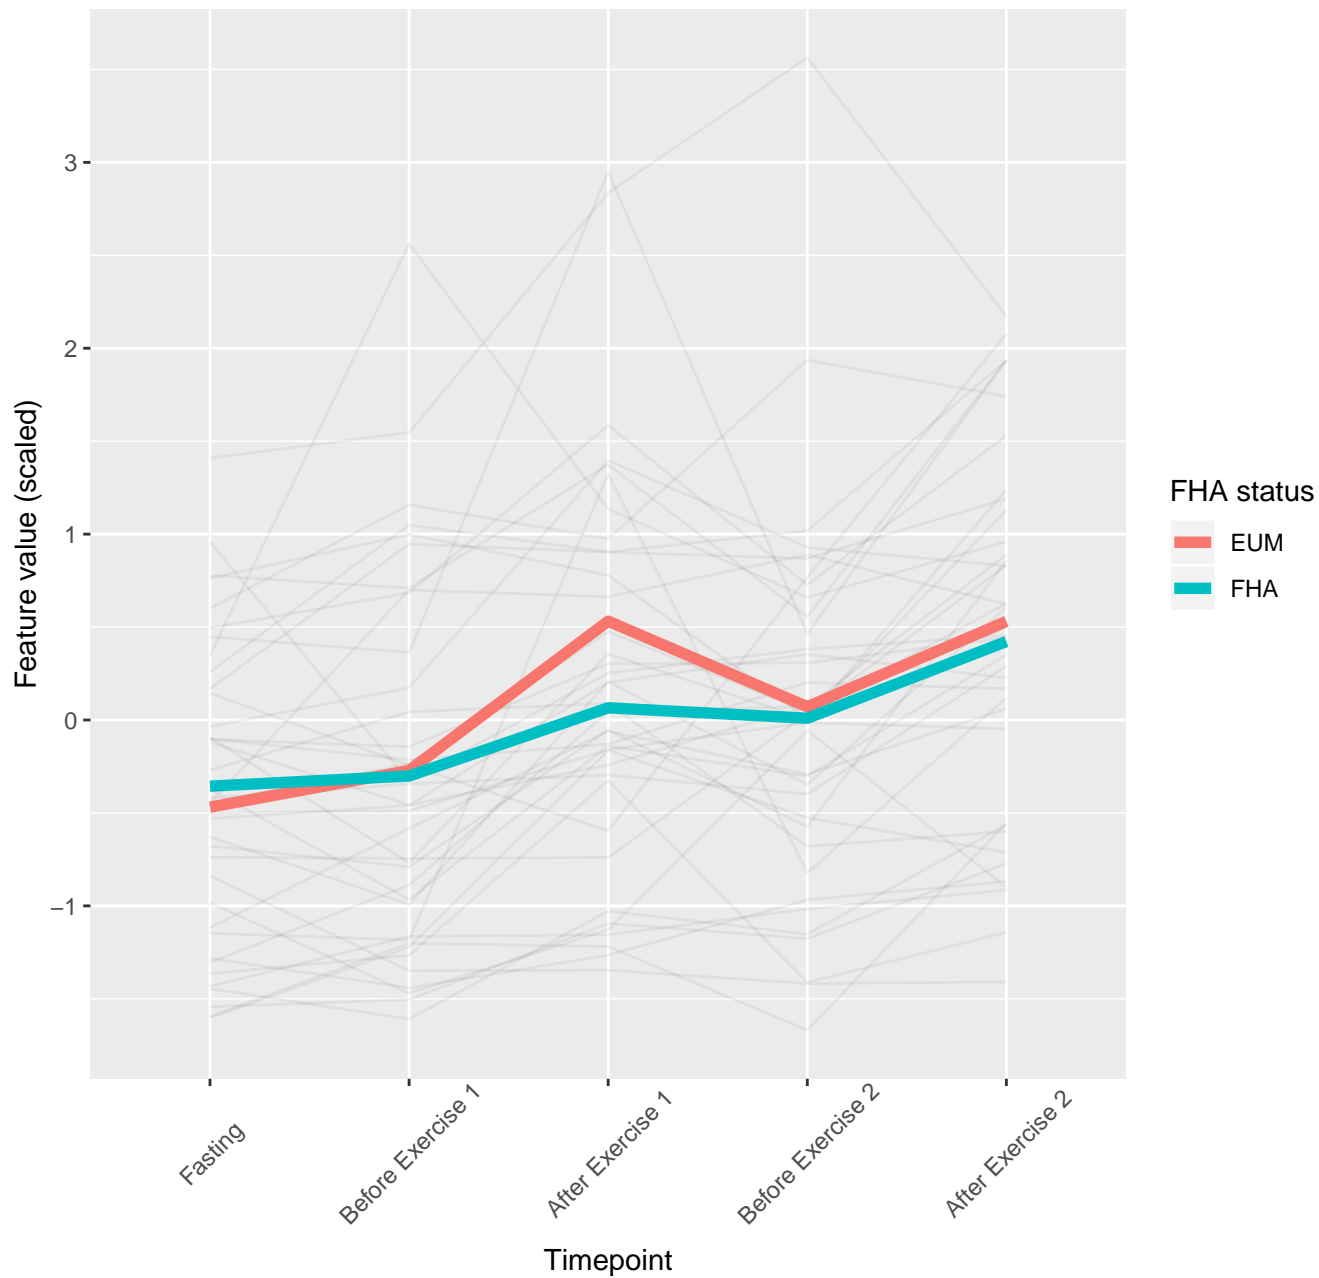

Line plot of TG(50:3)

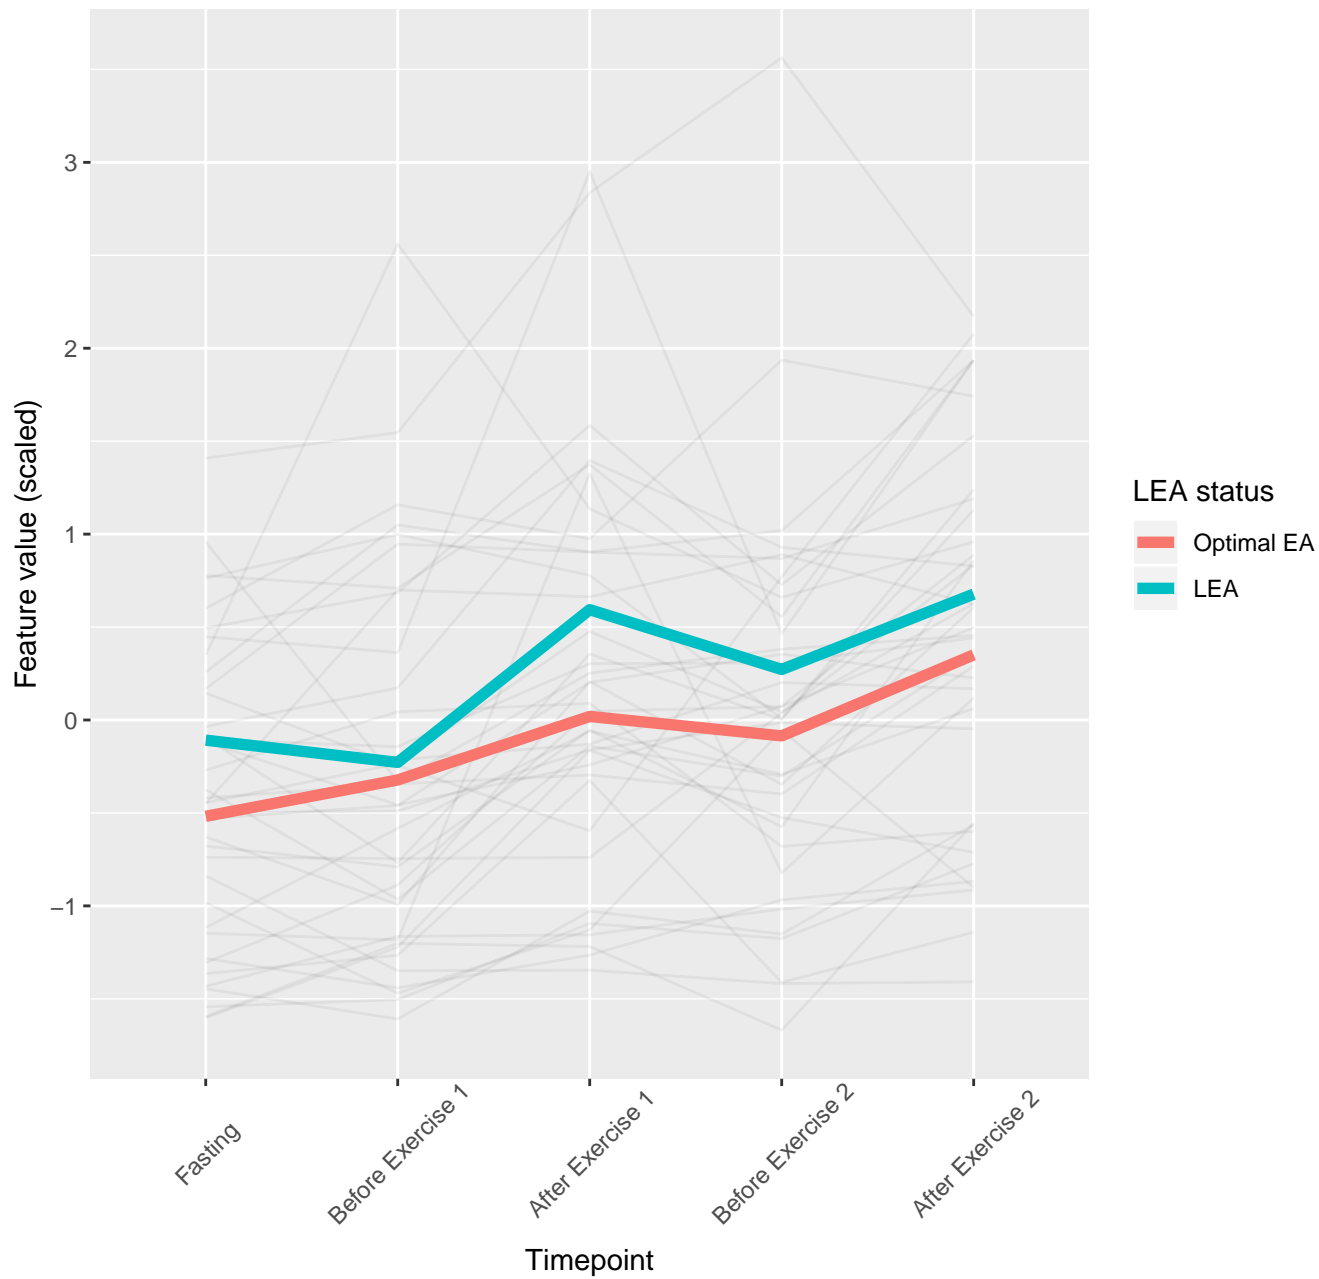

Line plot of TG(50:3).1

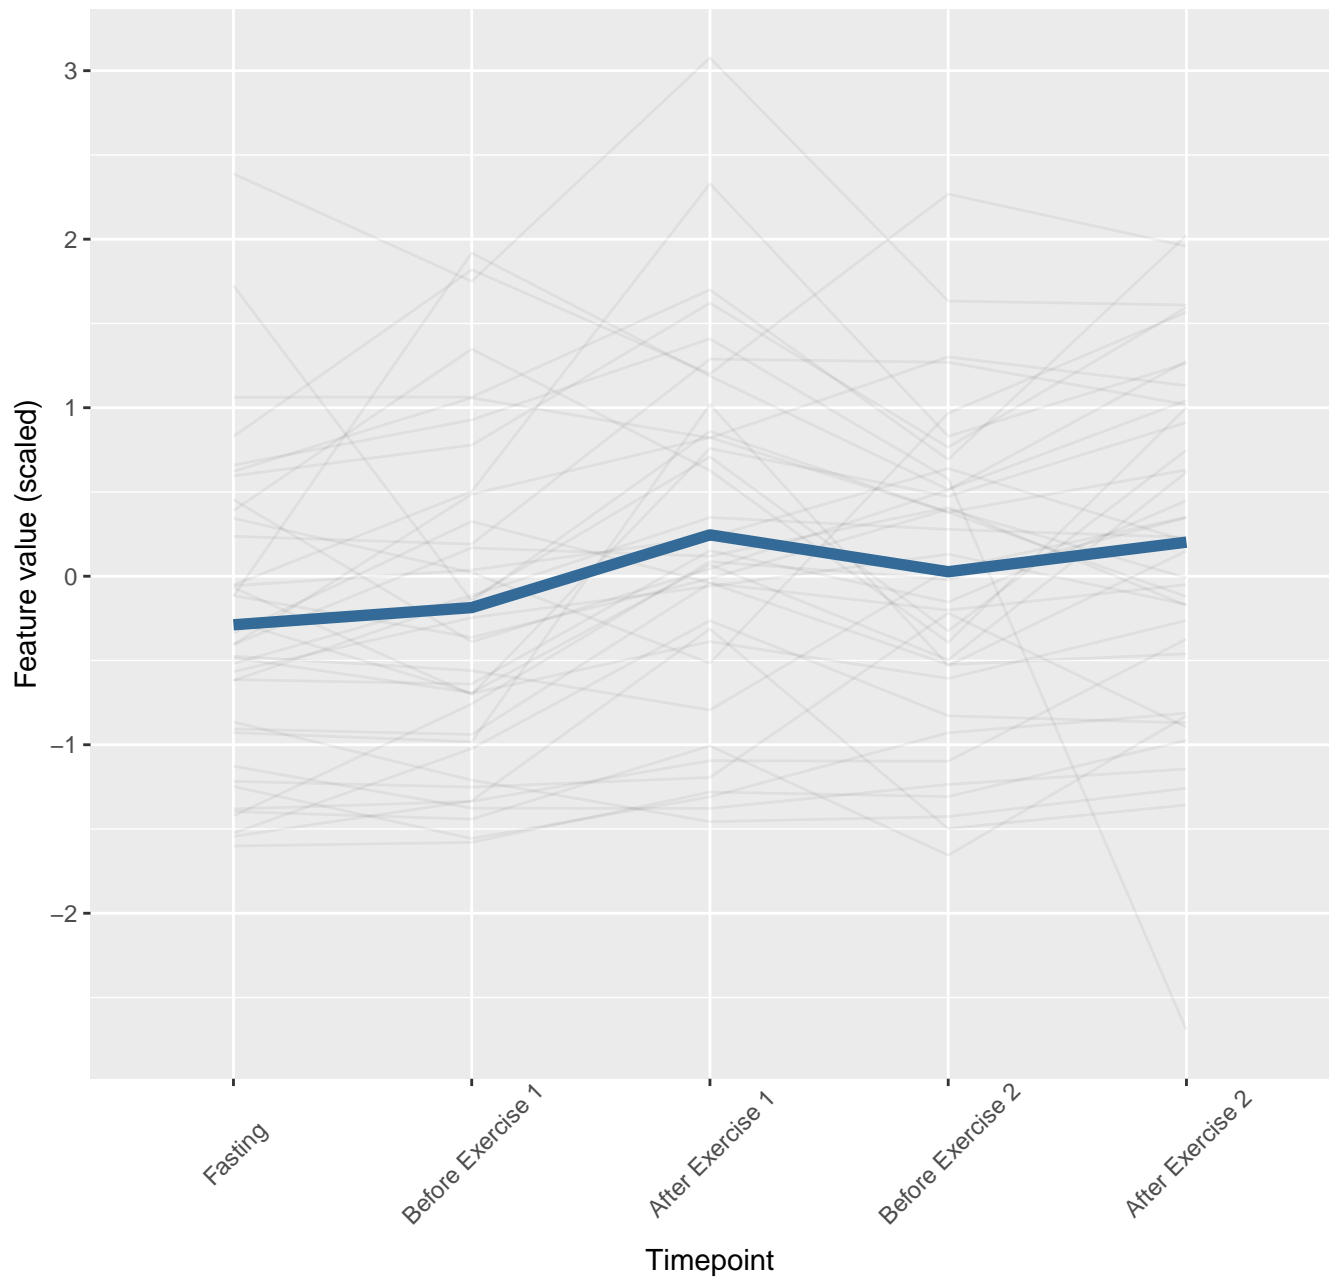

Line plot of TG(50:3).1

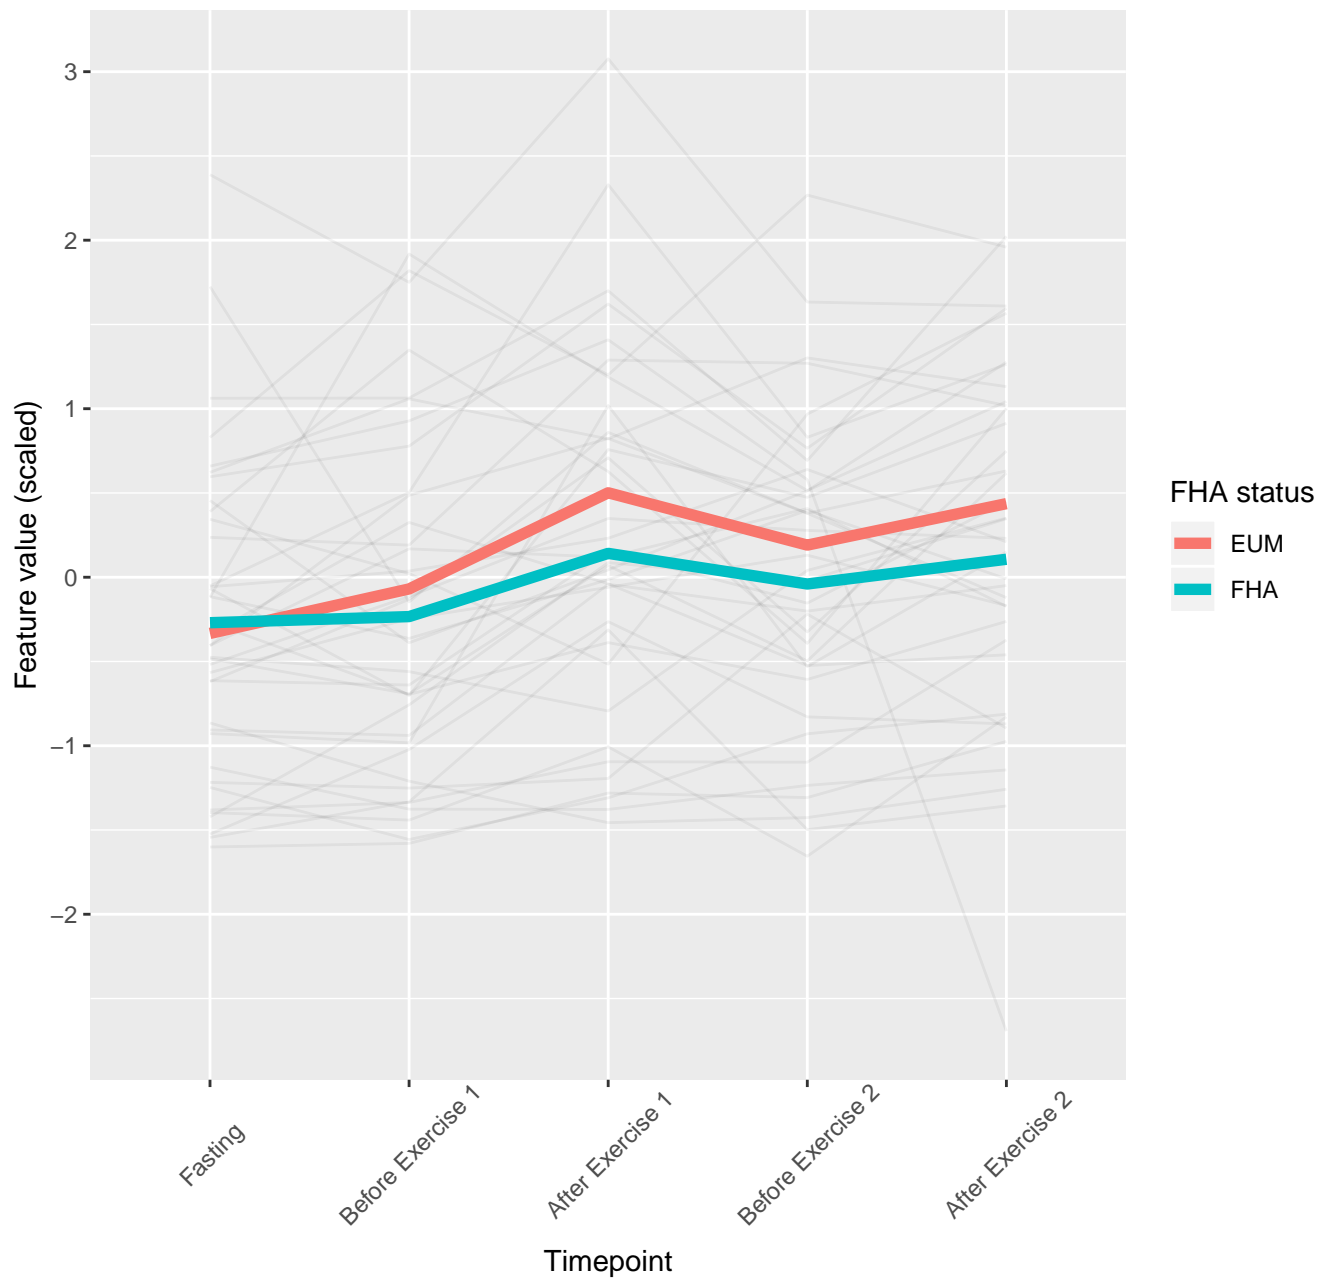

Line plot of TG(50:3).1

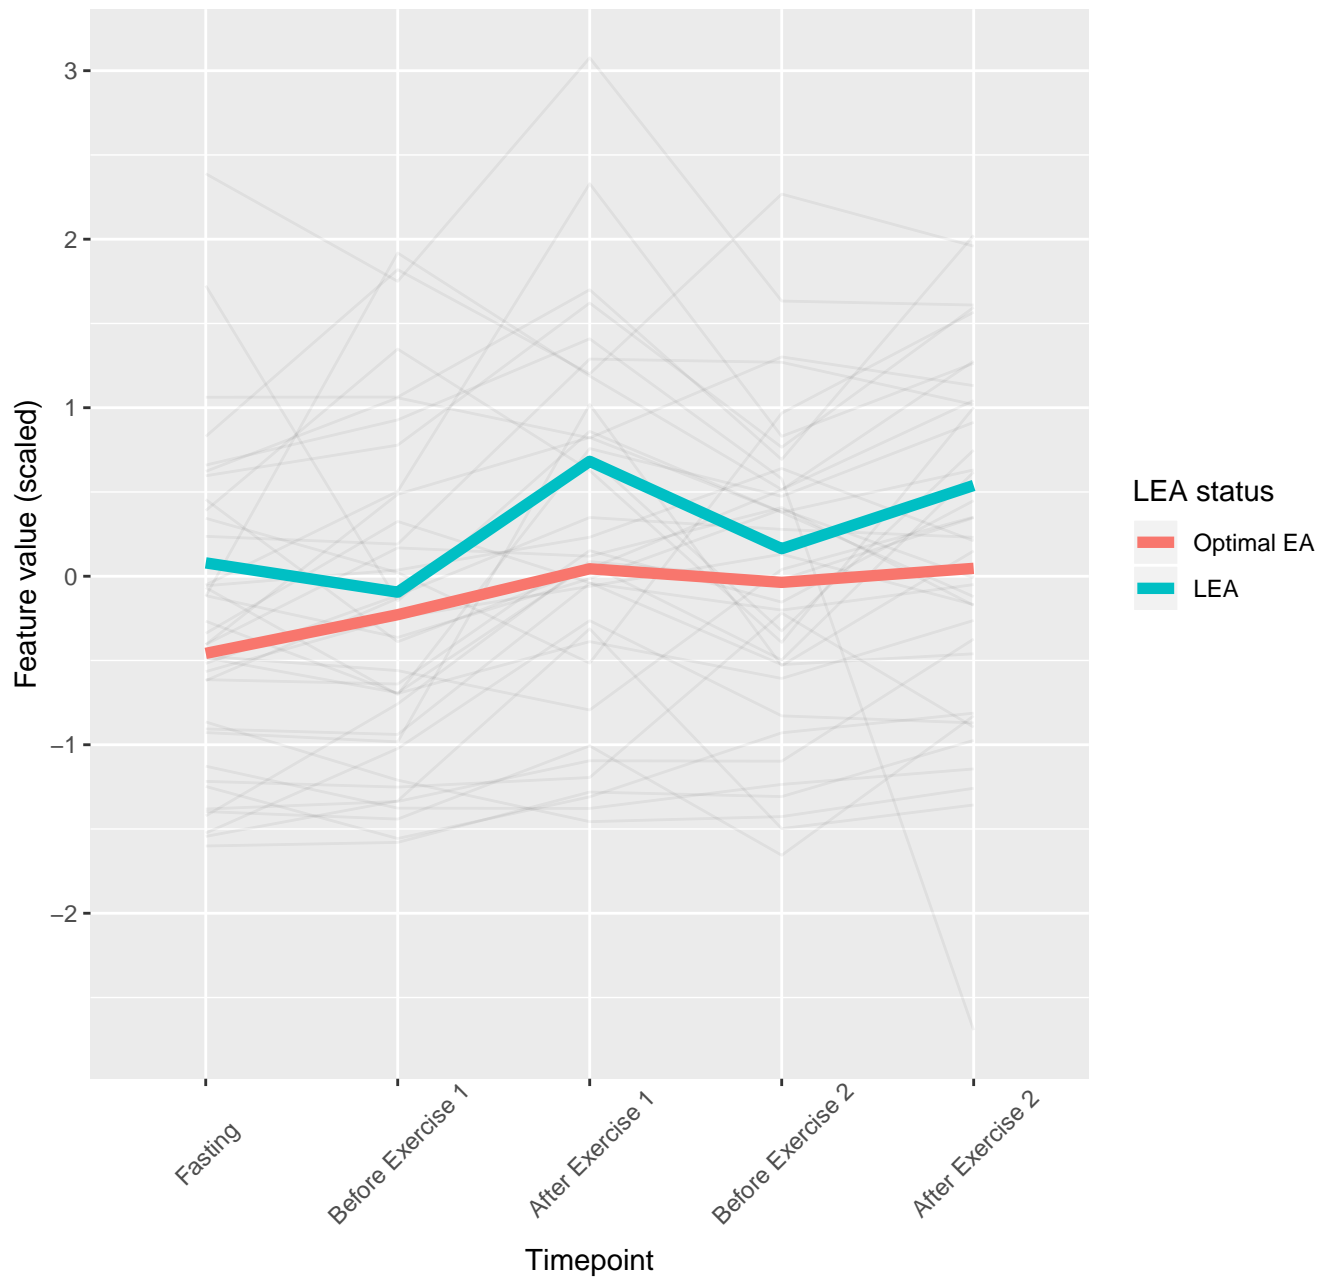

Line plot of TG(50:4)

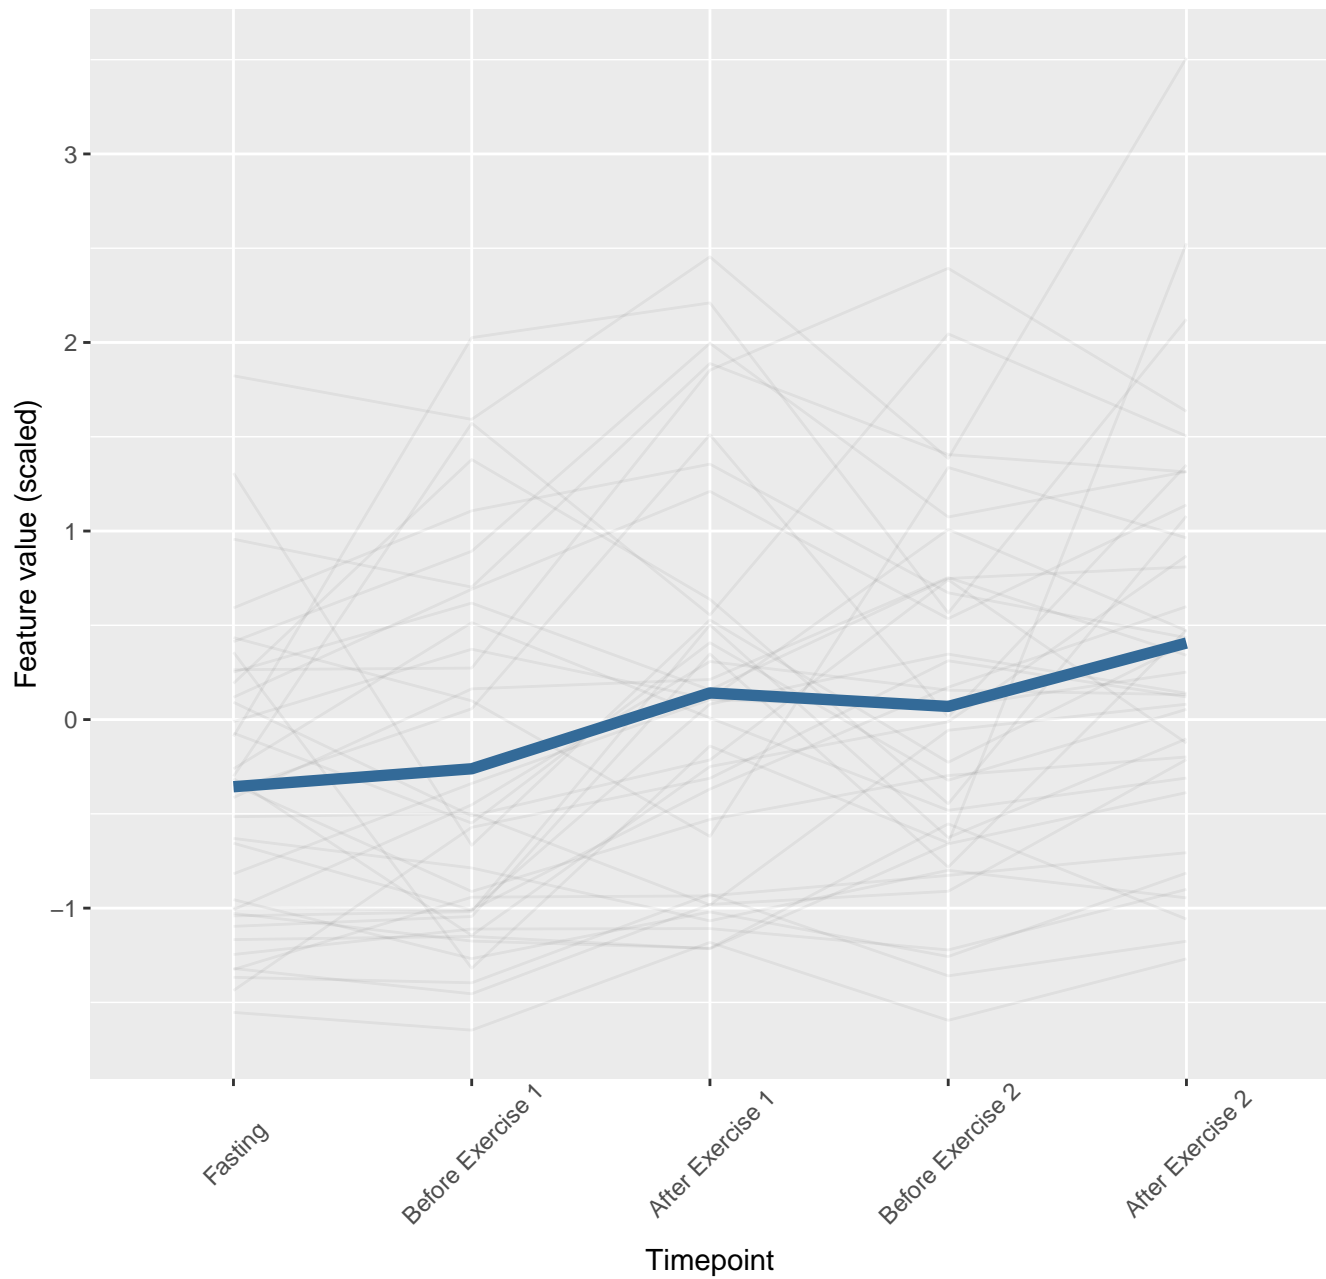



Line plot of TG(50:4)

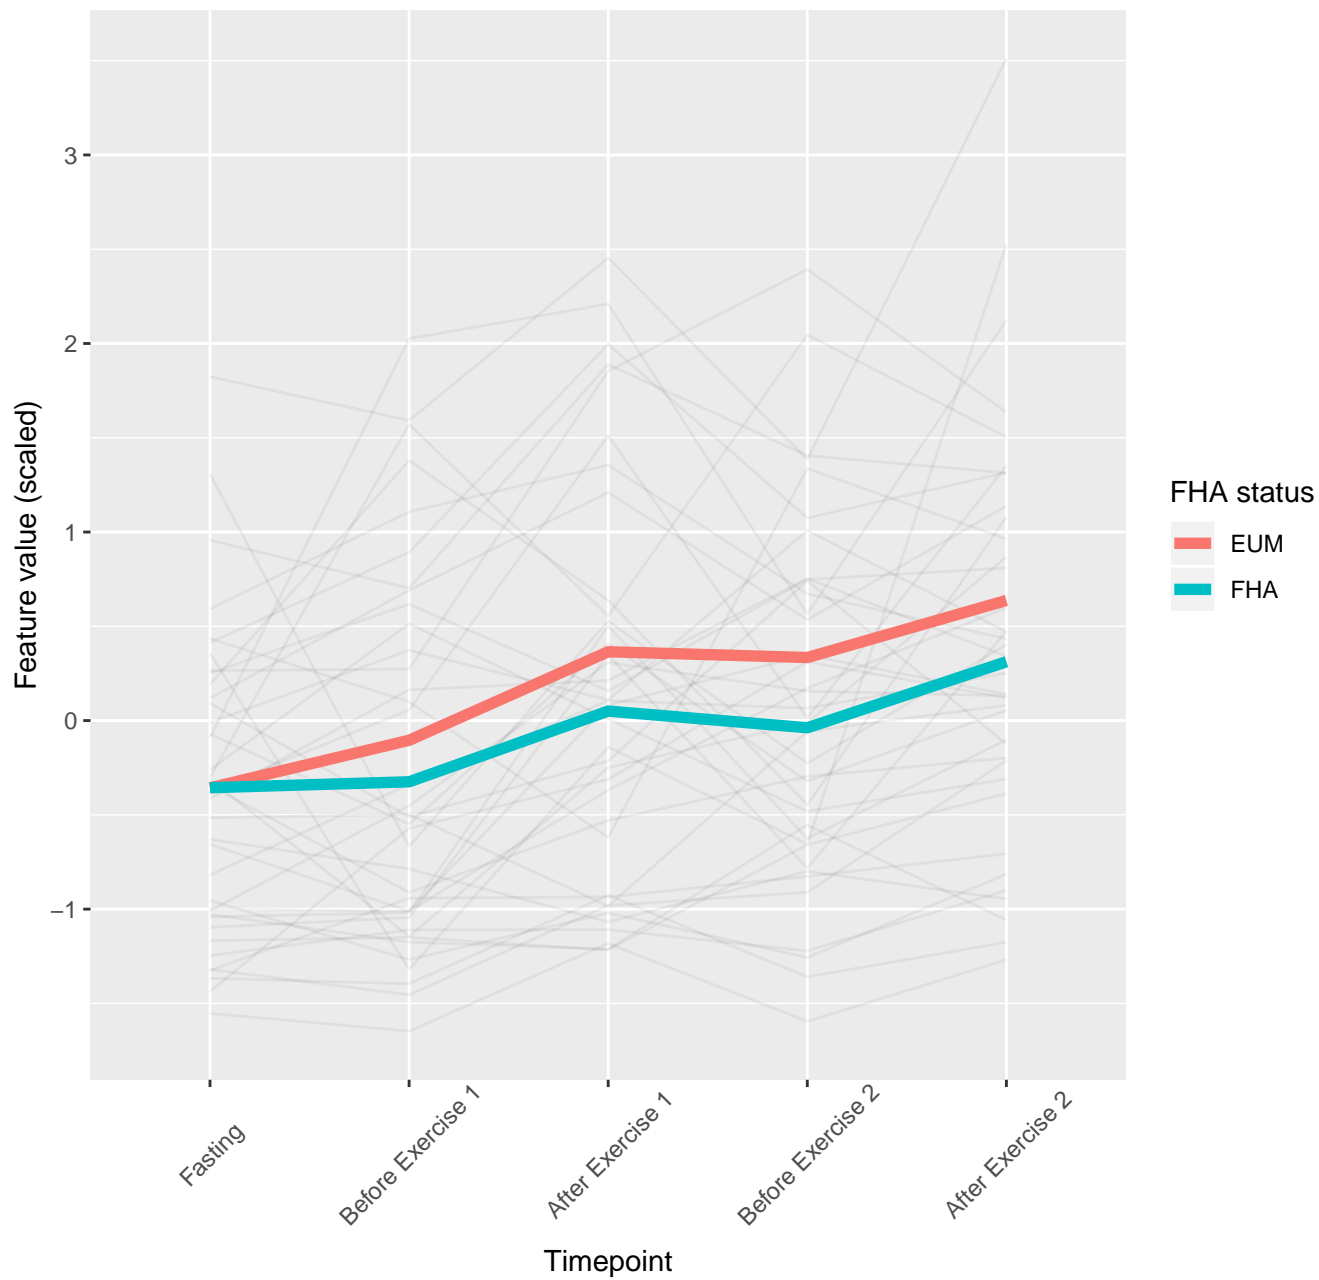

Line plot of TG(50:4)

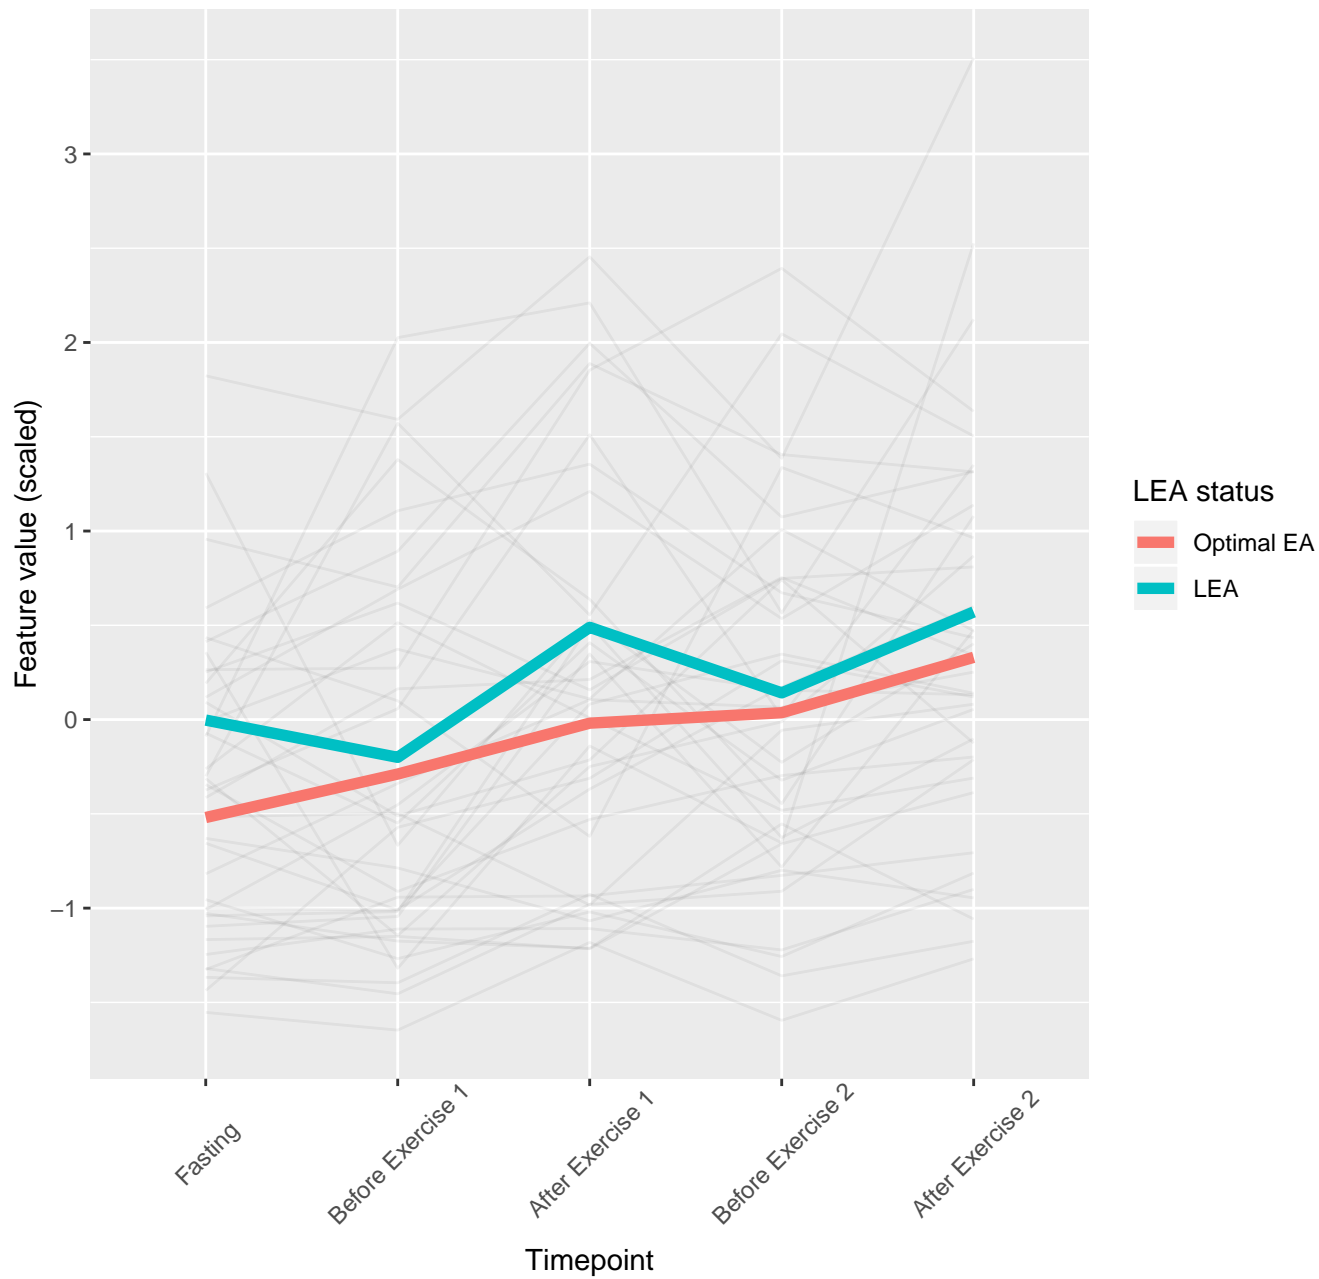

Line plot of TG(50:5)

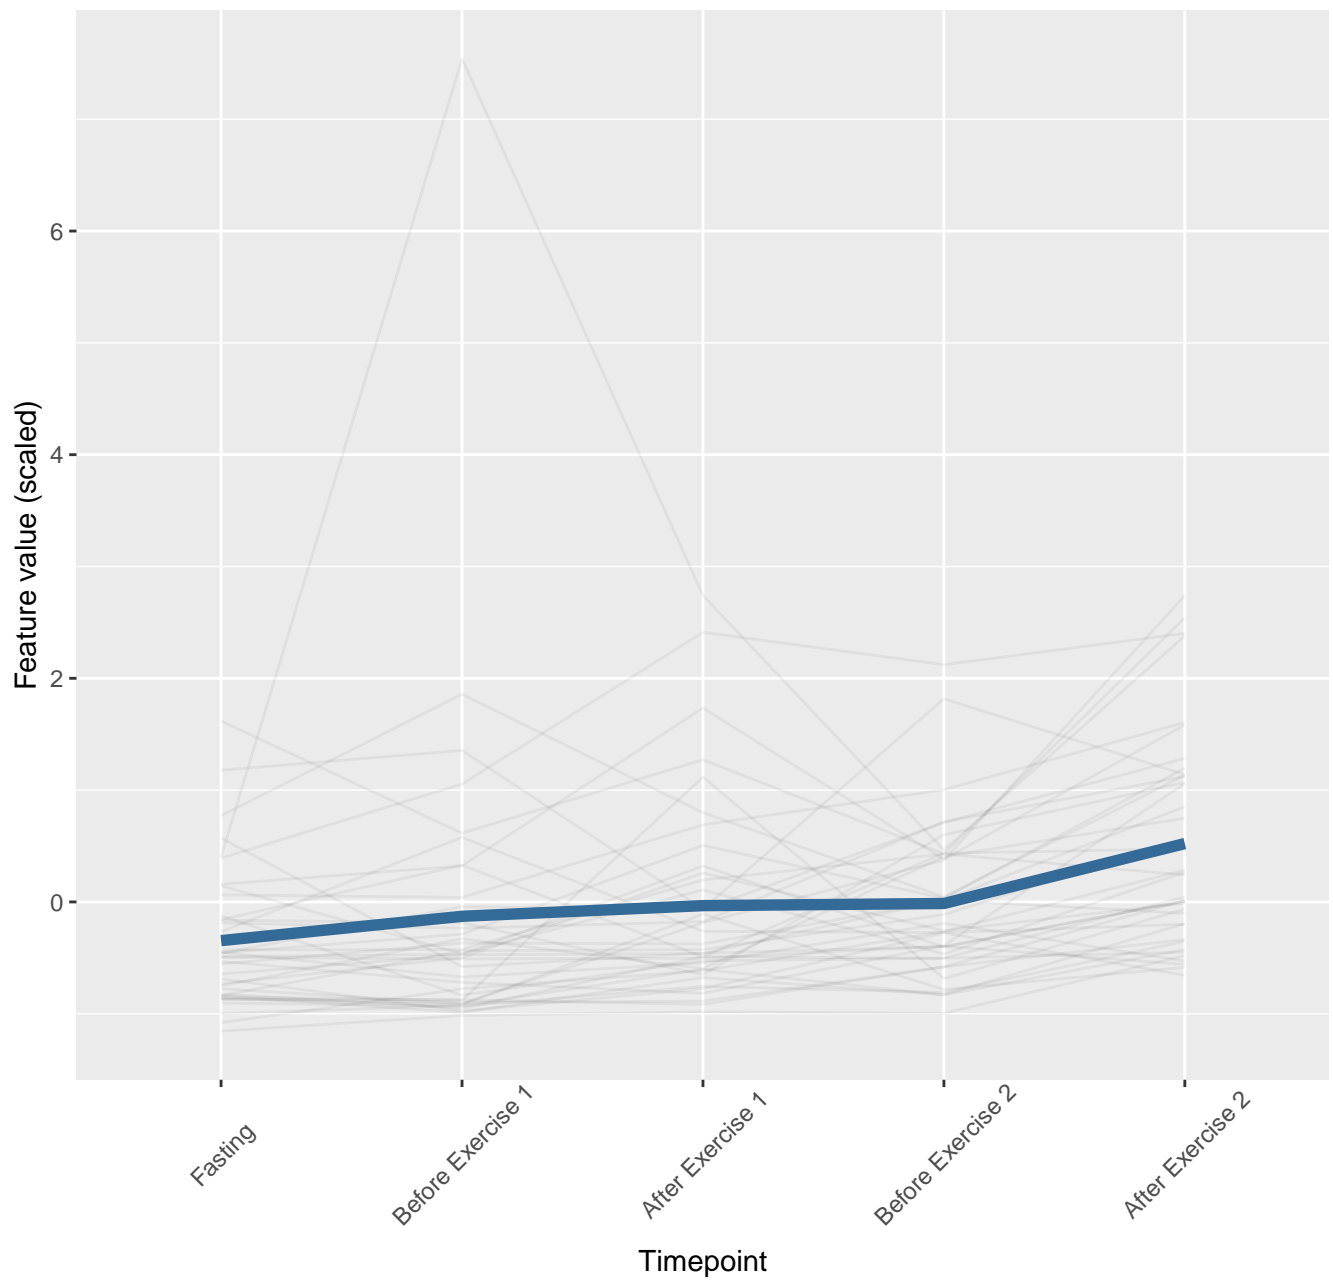

Line plot of TG(50:5)

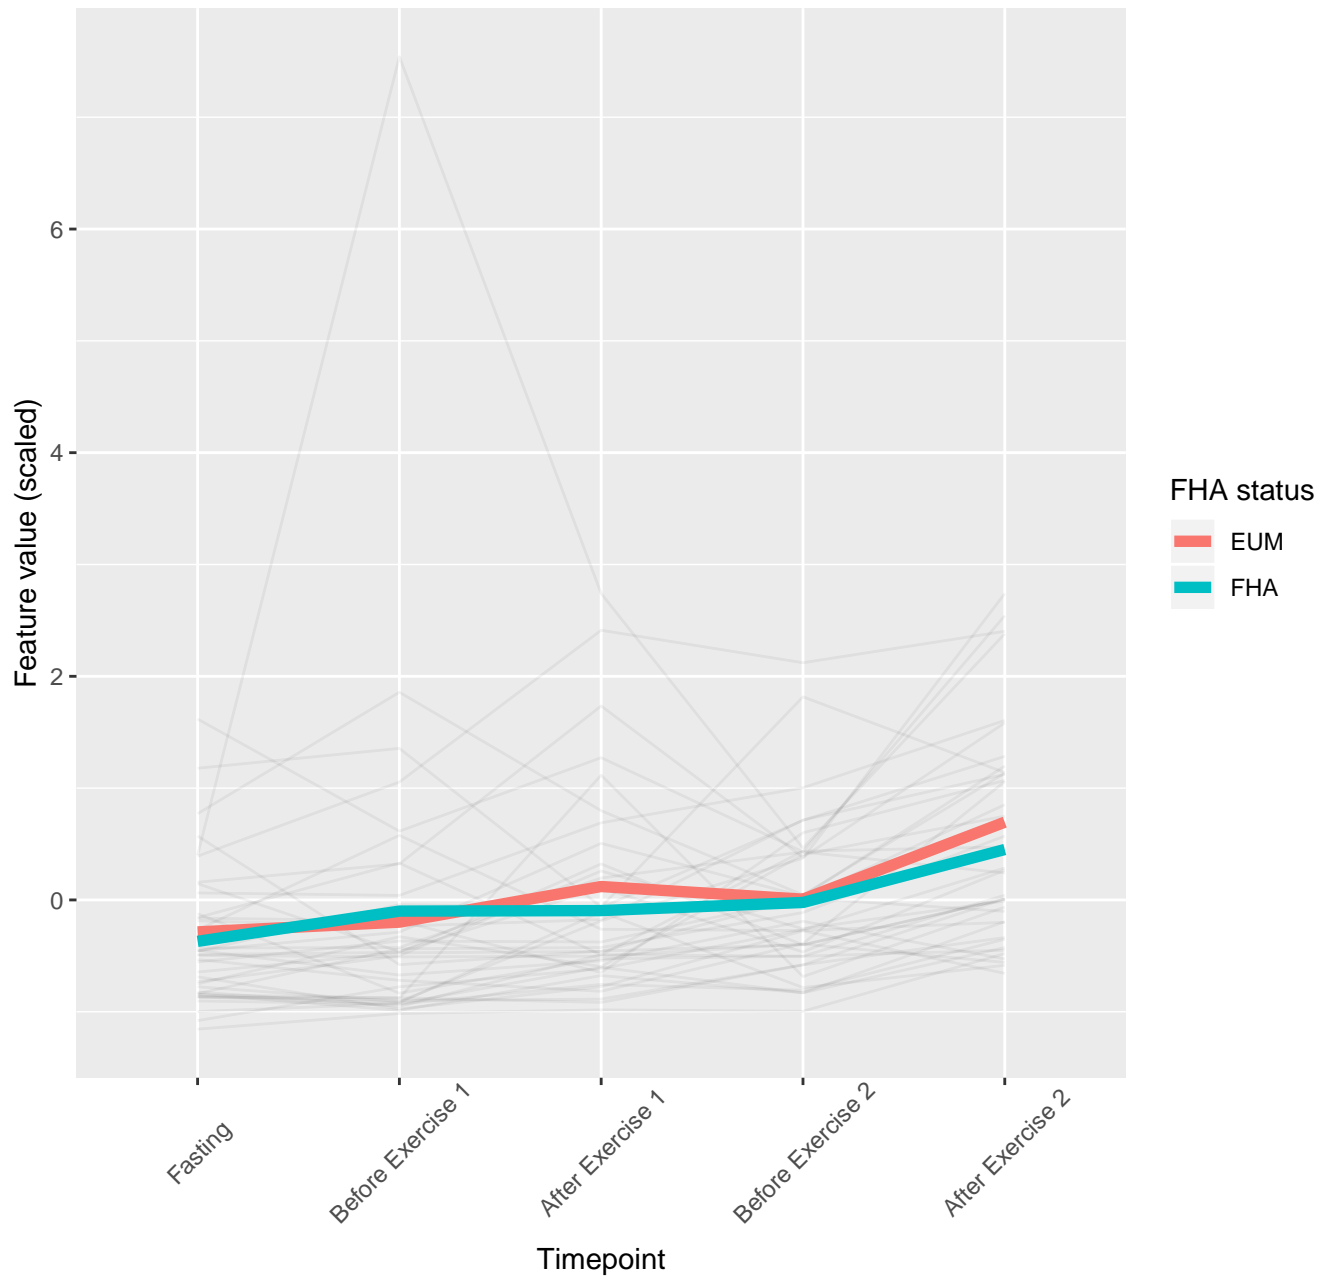

Line plot of TG(50:5)

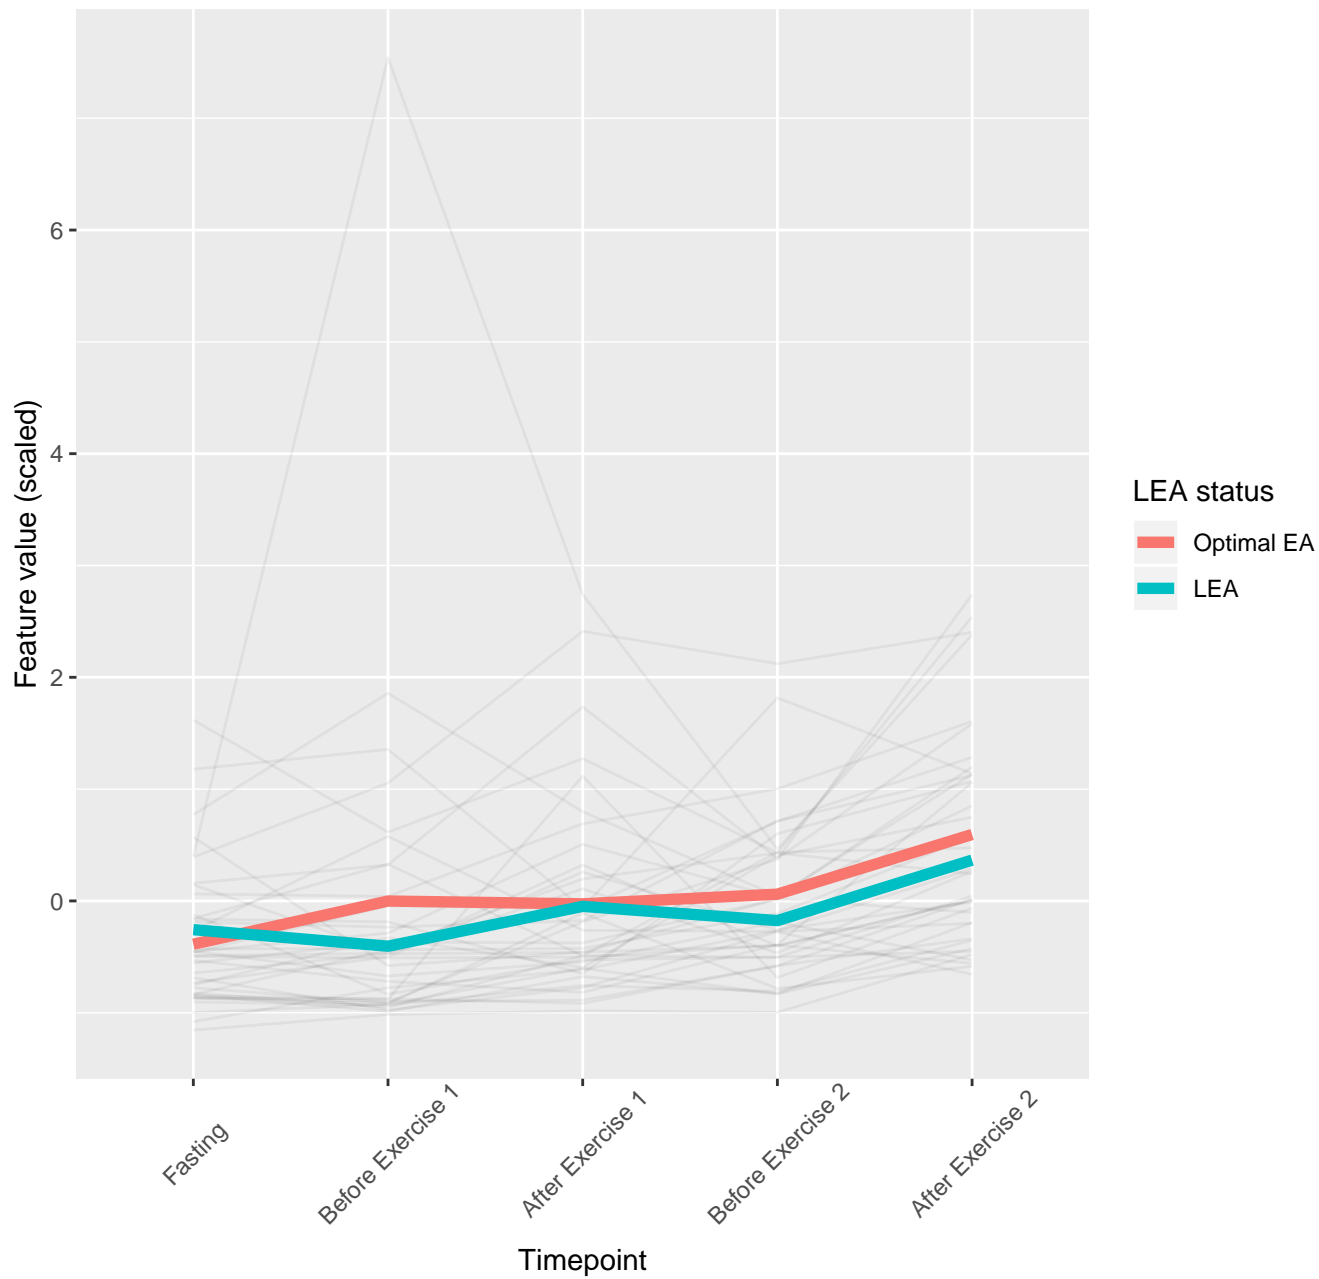

Line plot of TG(51:1)

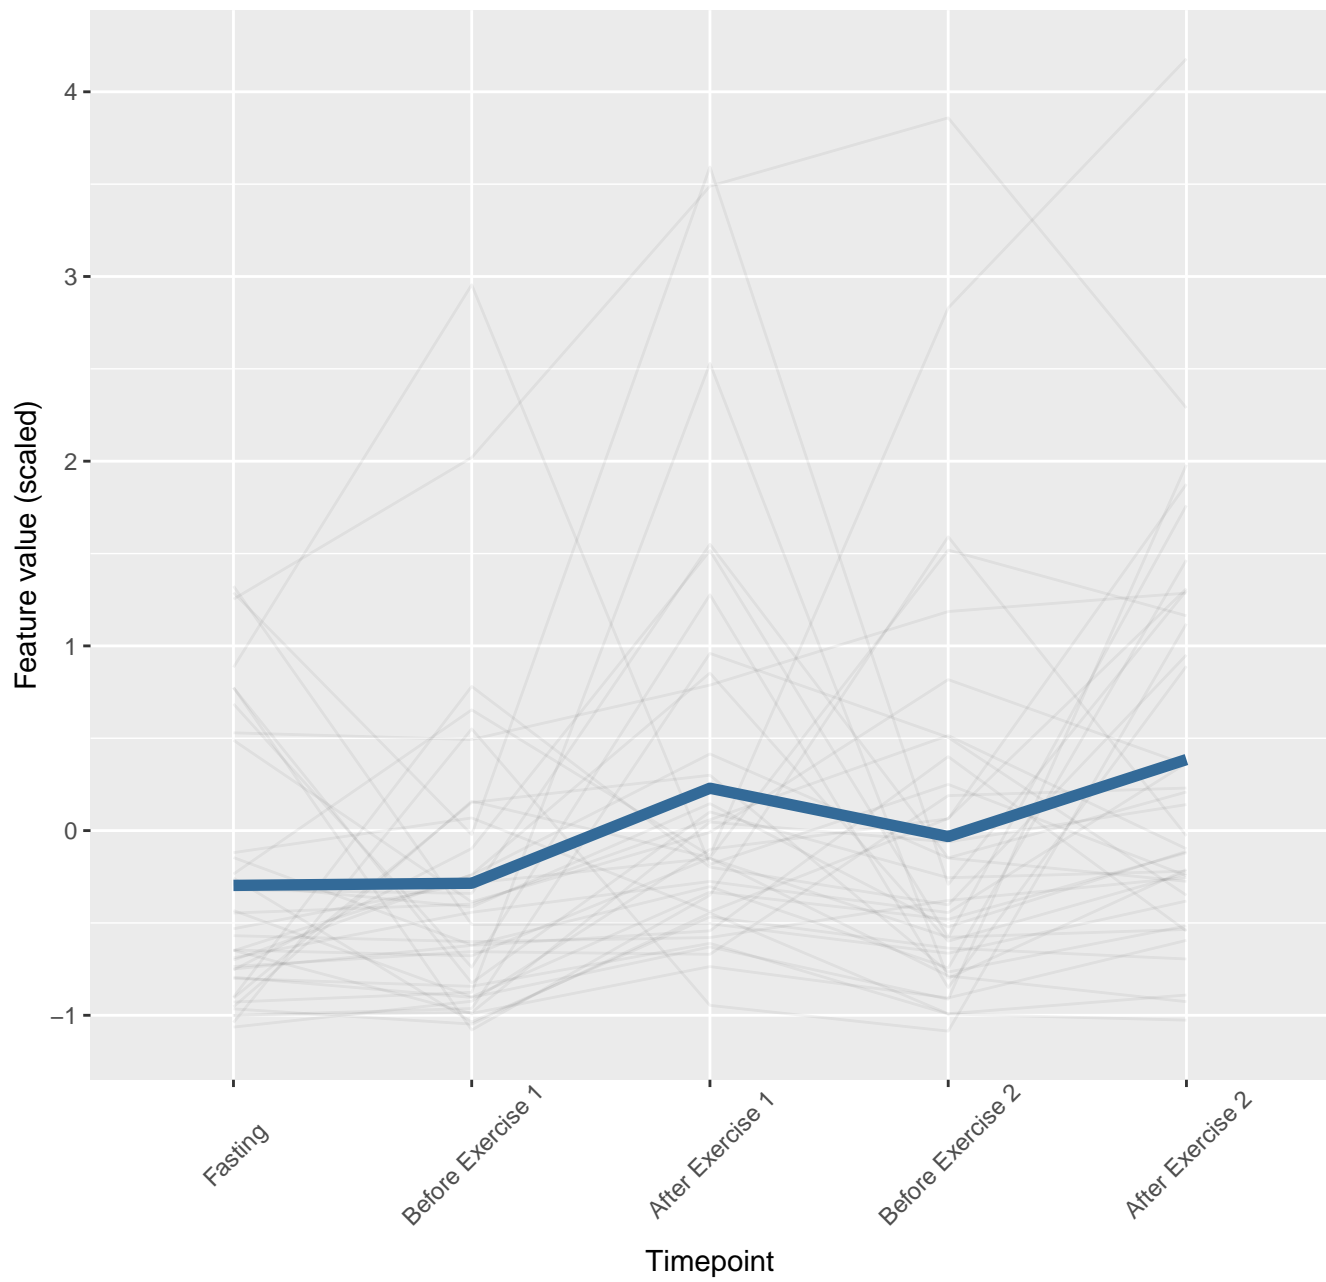

Line plot of TG(51:1)

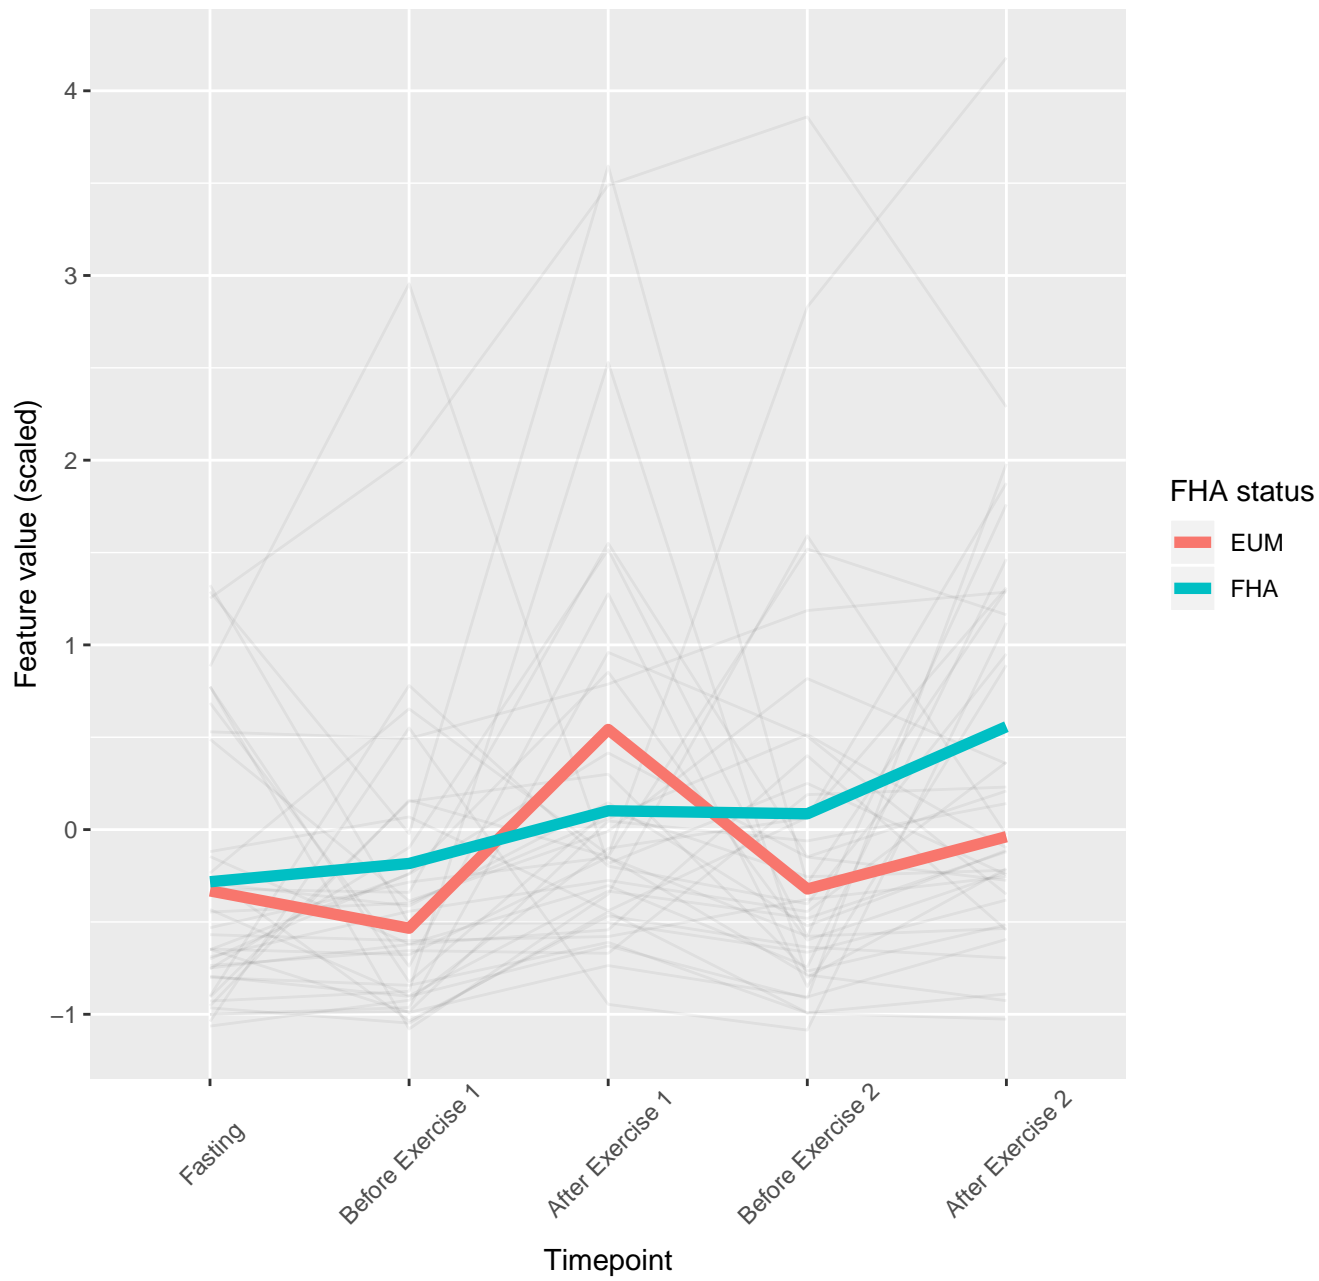

Line plot of TG(51:1)

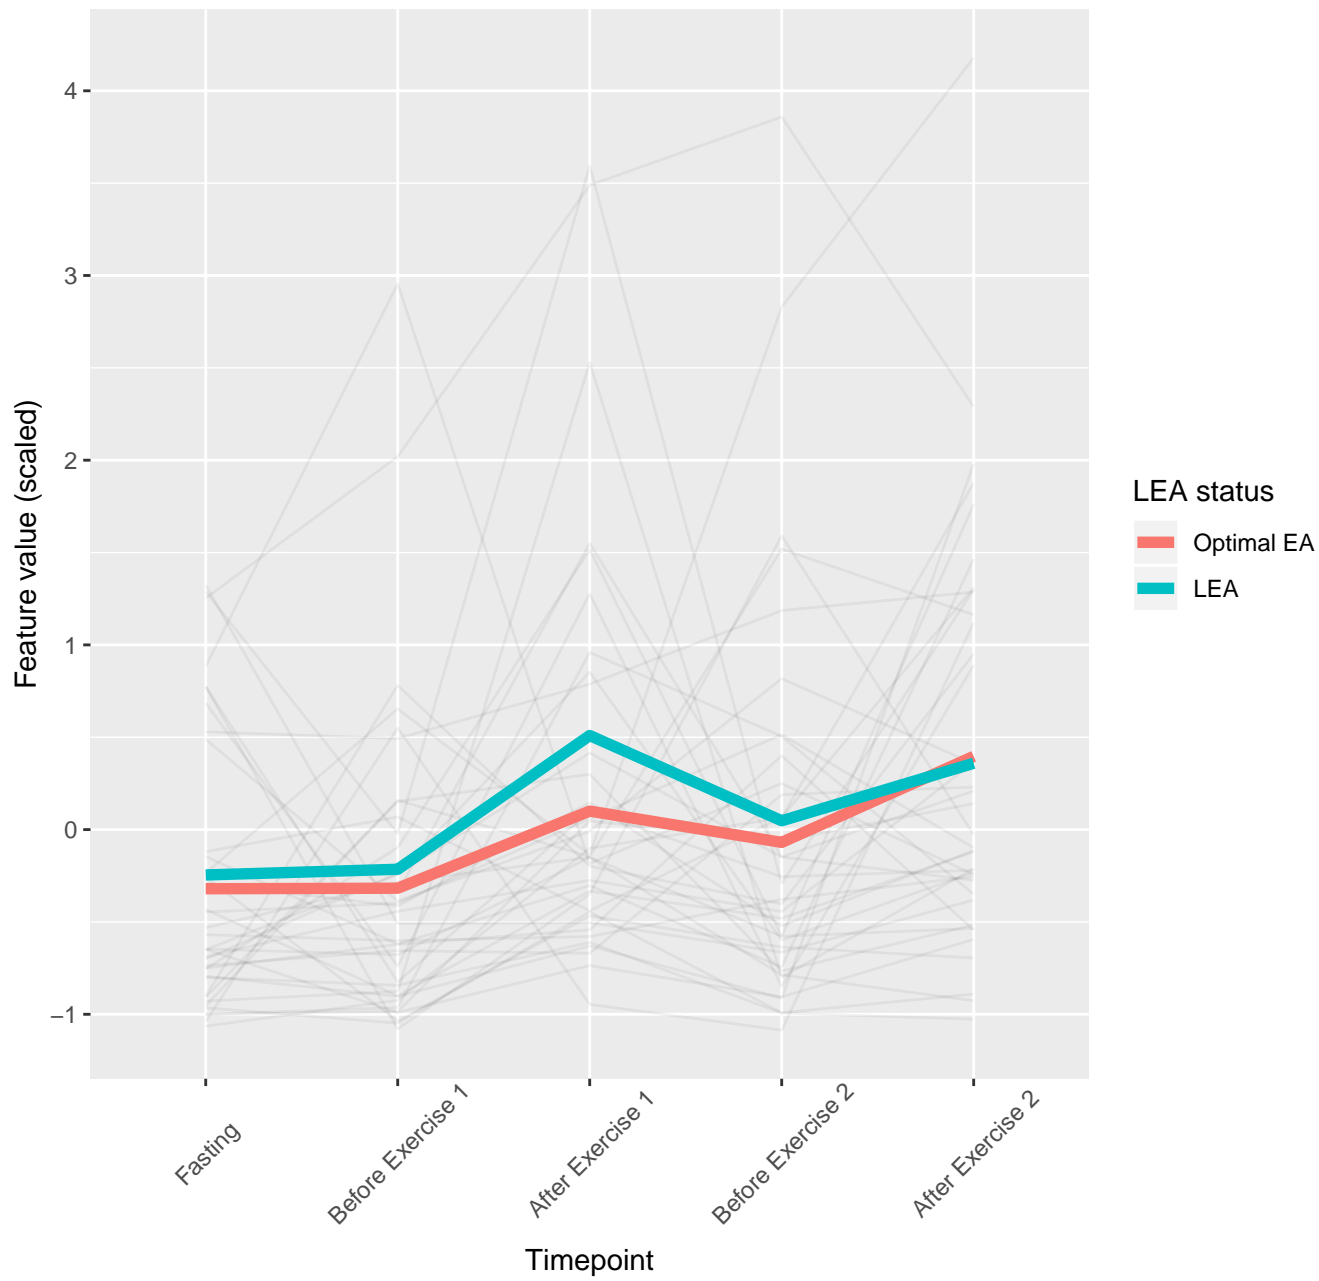



Line plot of TG(51:2)

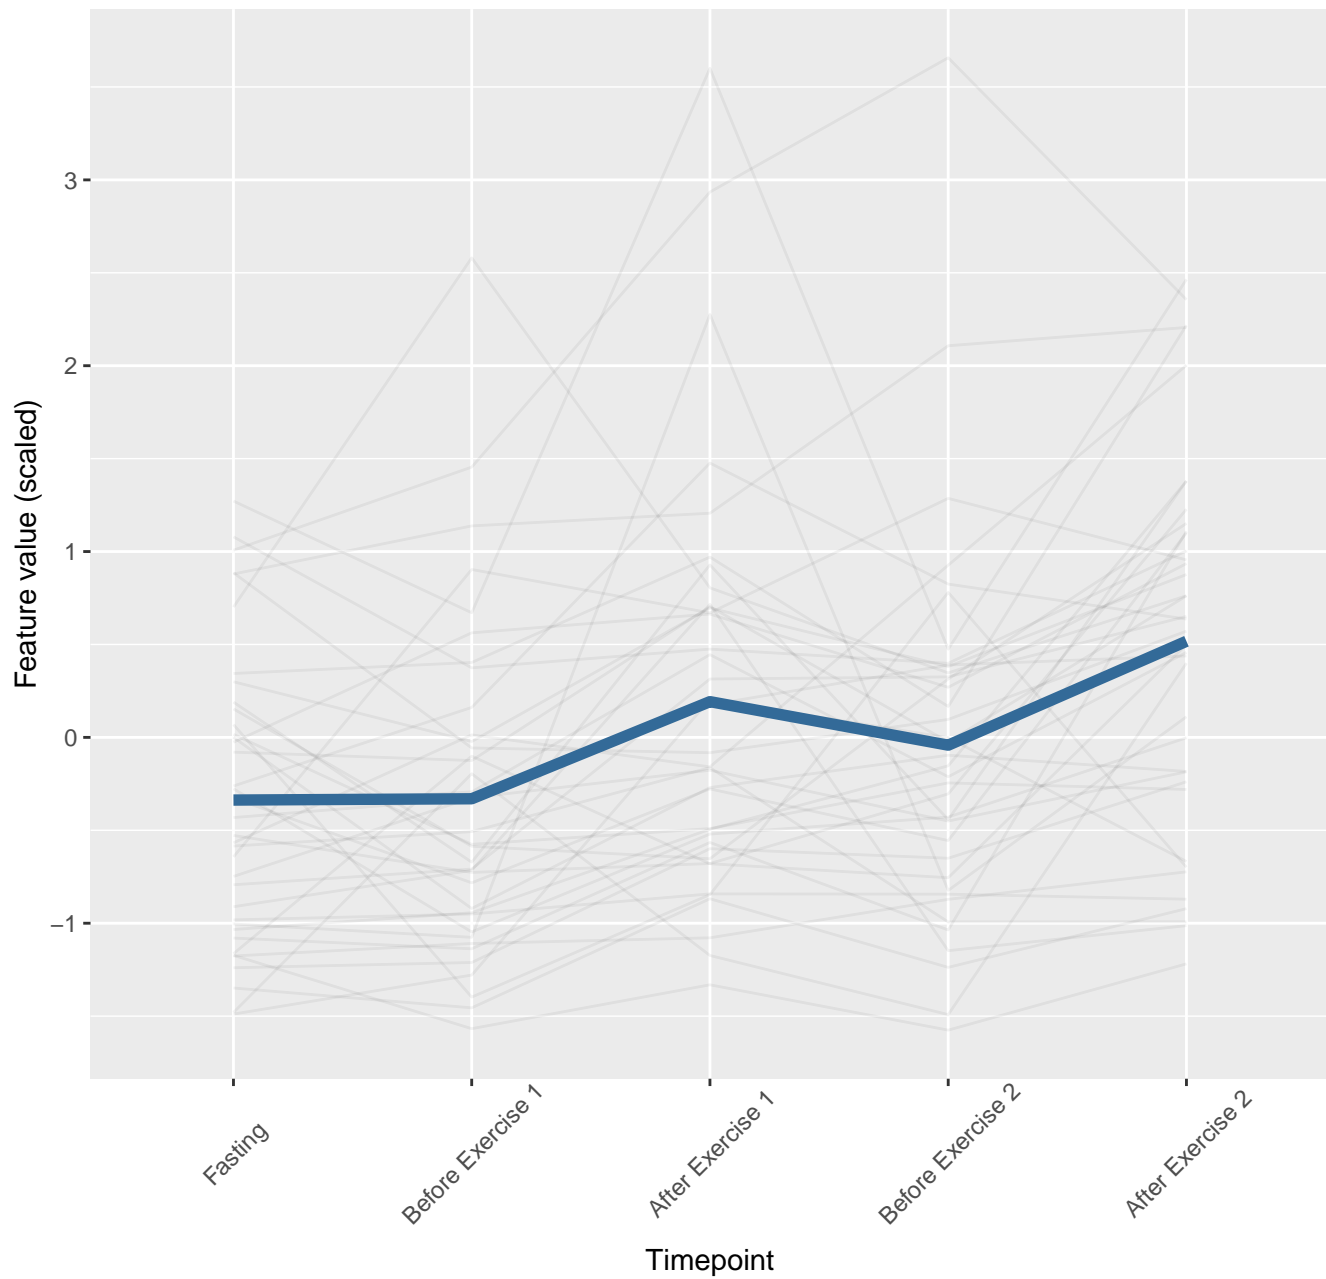

Line plot of TG(51:2)

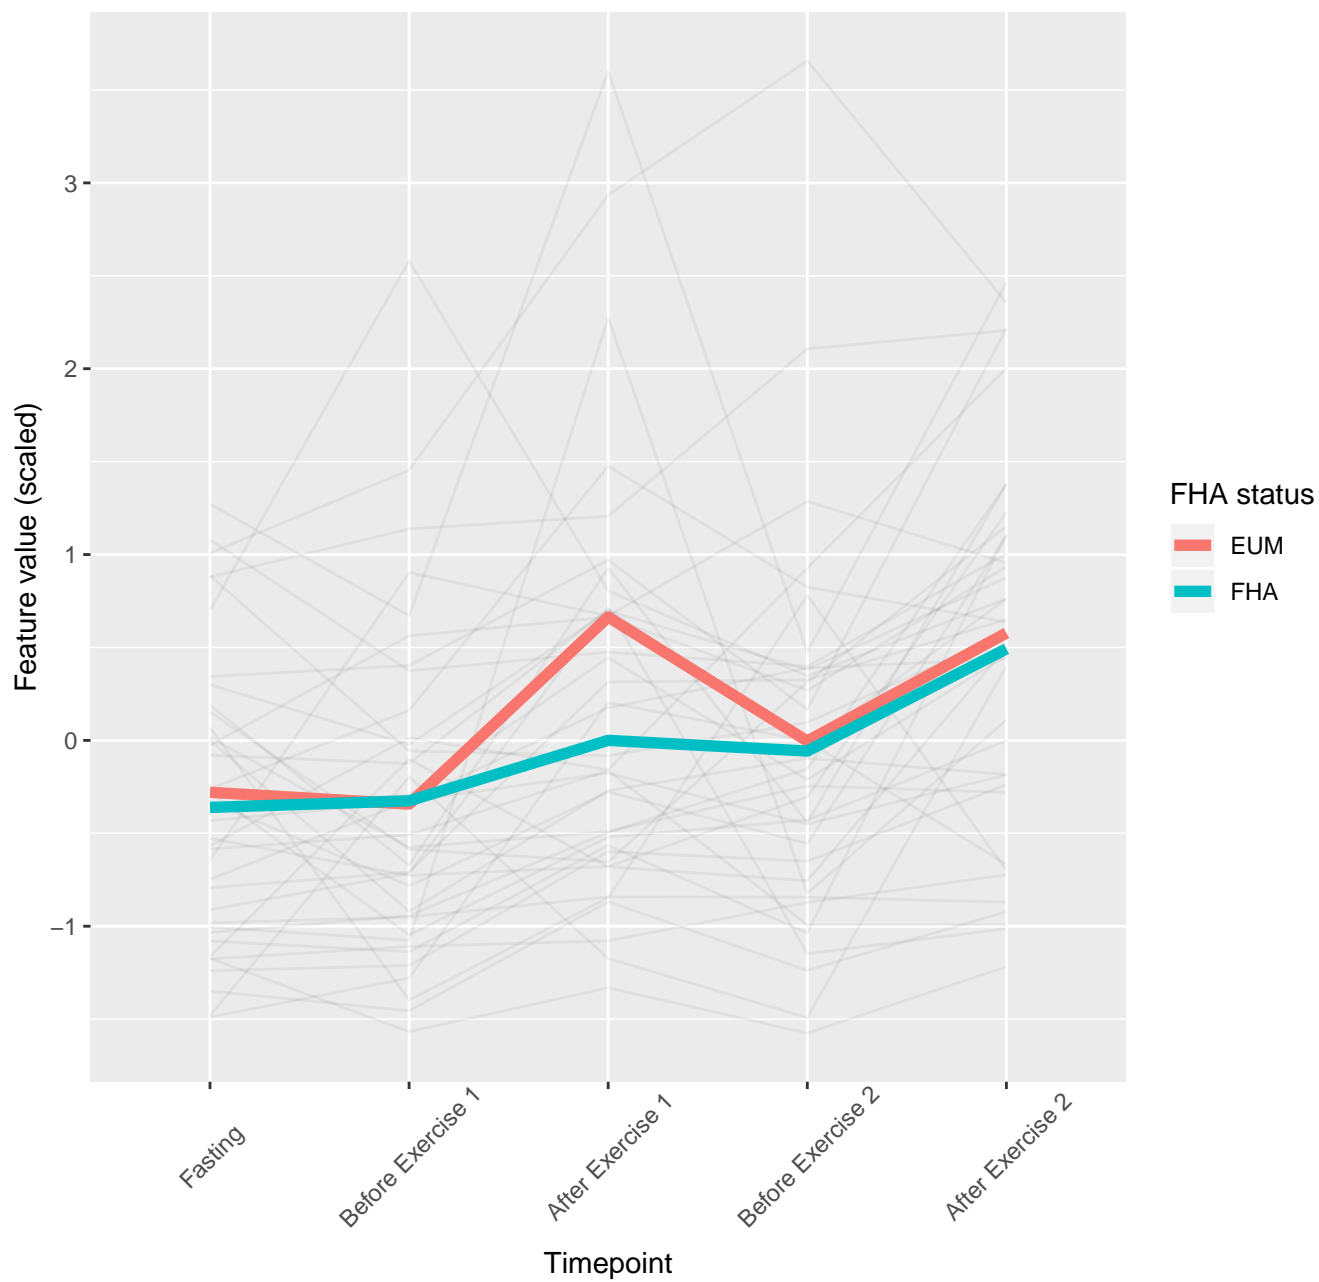

Line plot of TG(51:2)

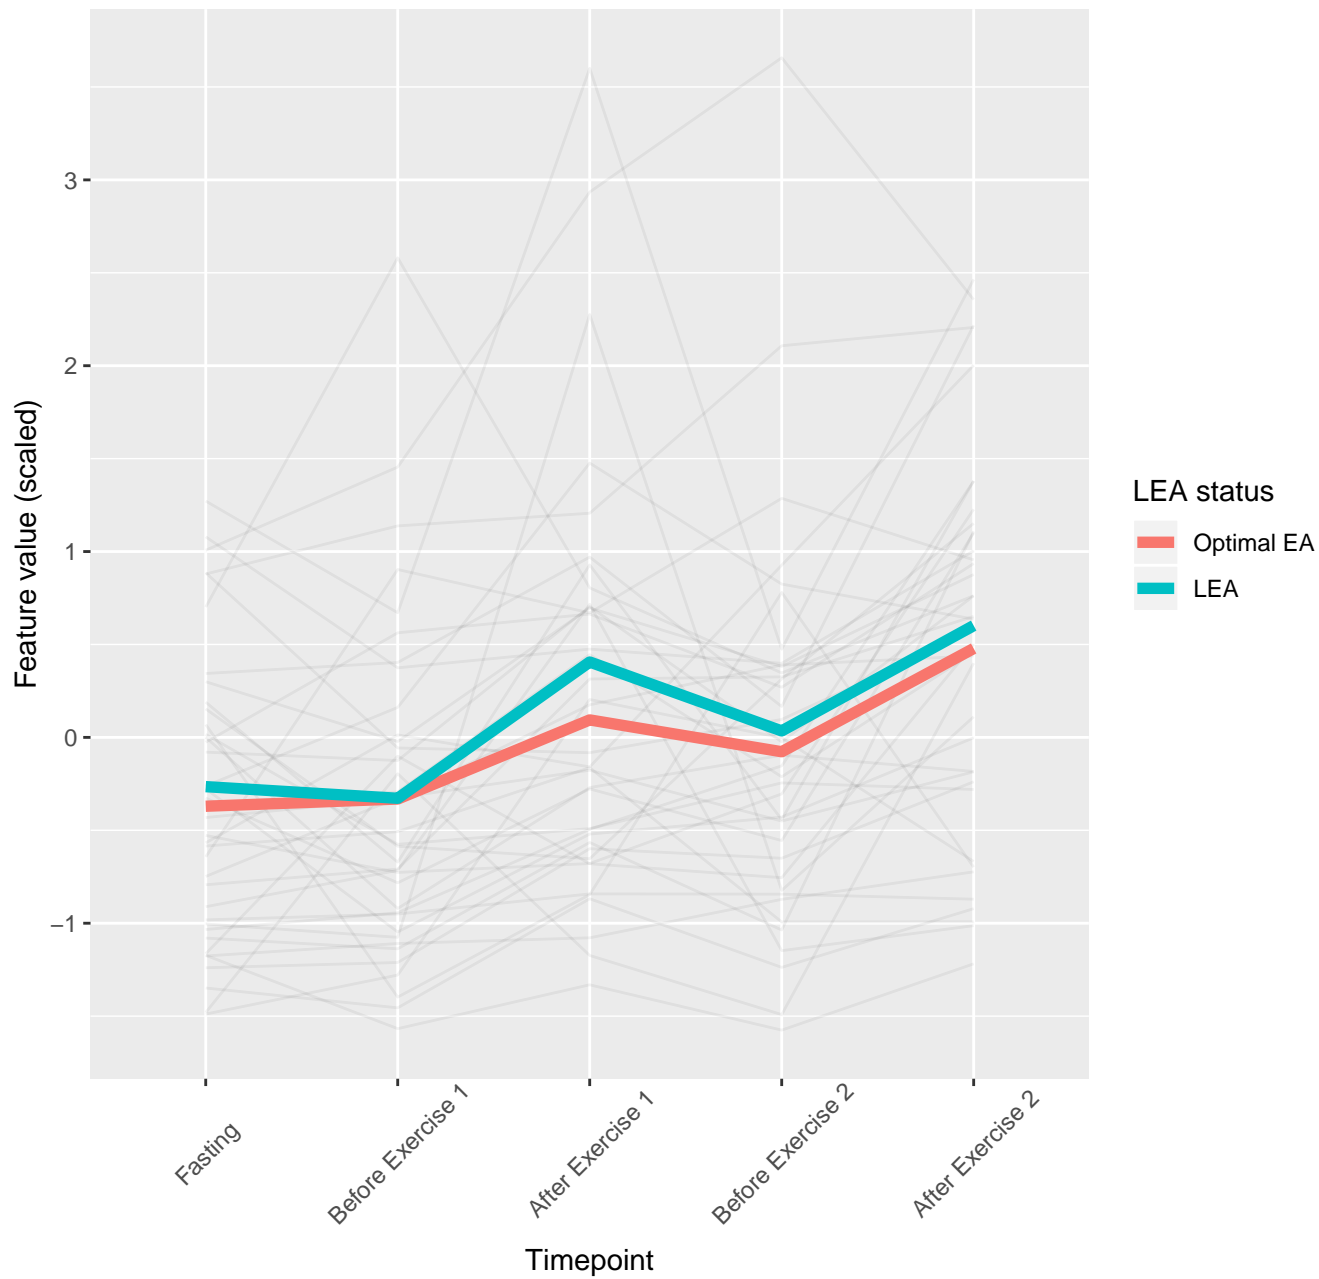

Line plot of TG(51:2).1

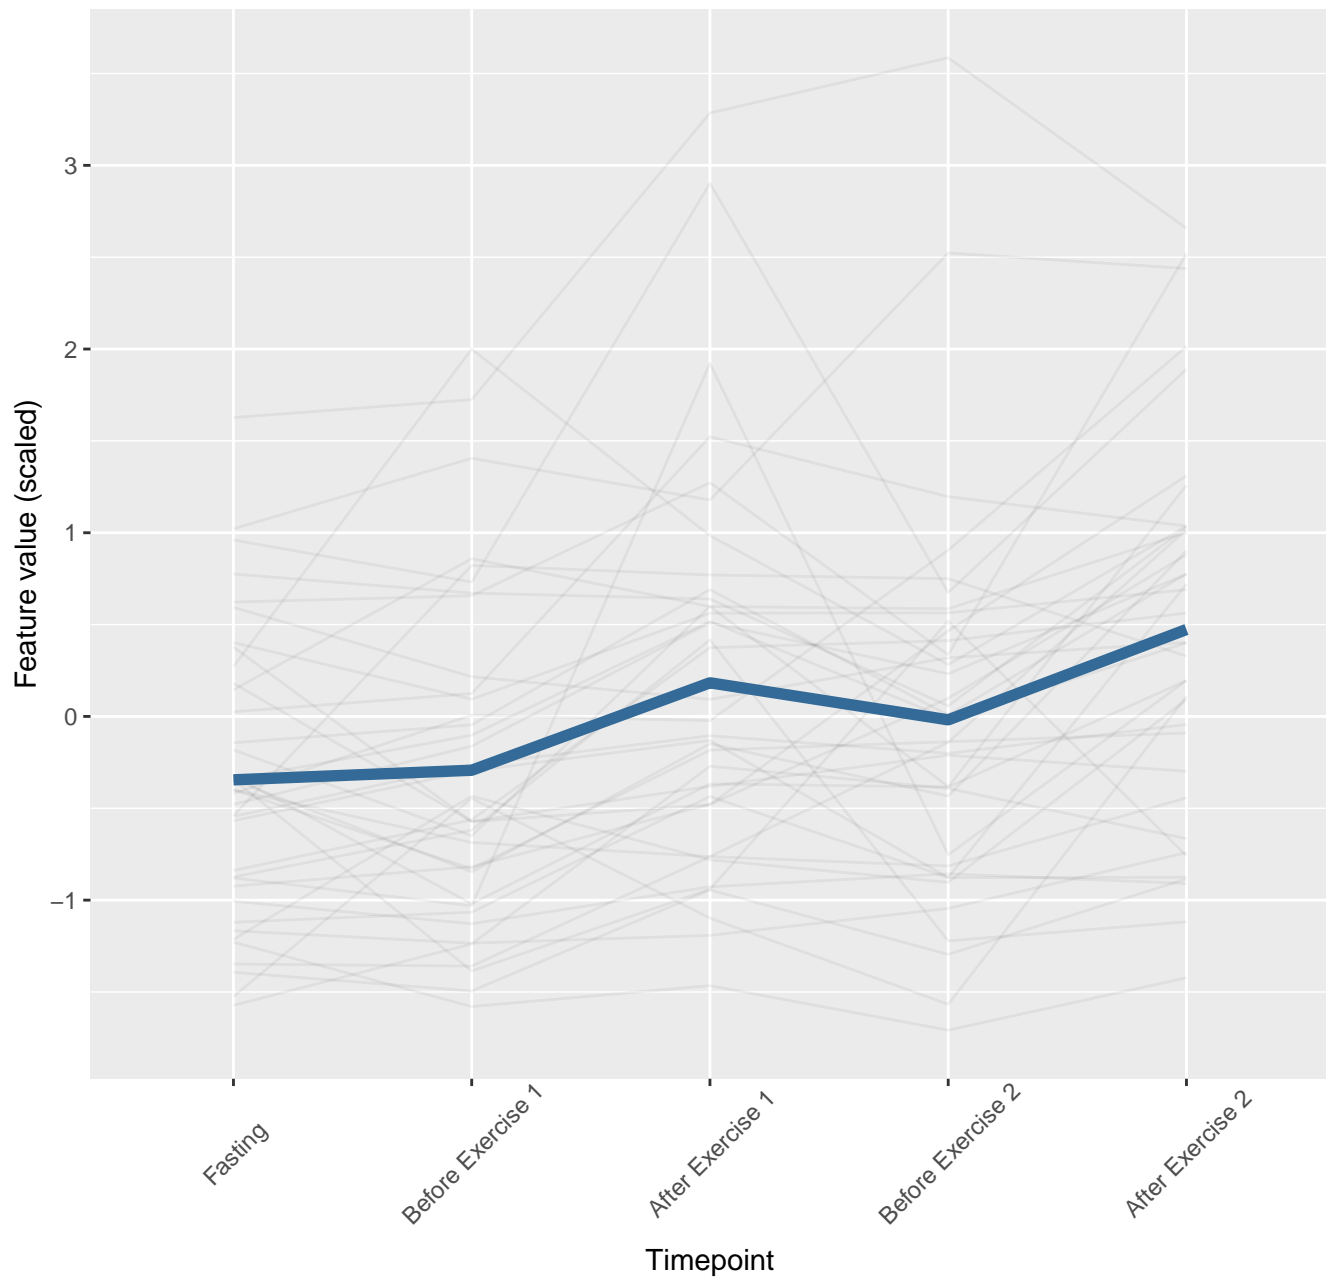

Line plot of TG(51:2).1

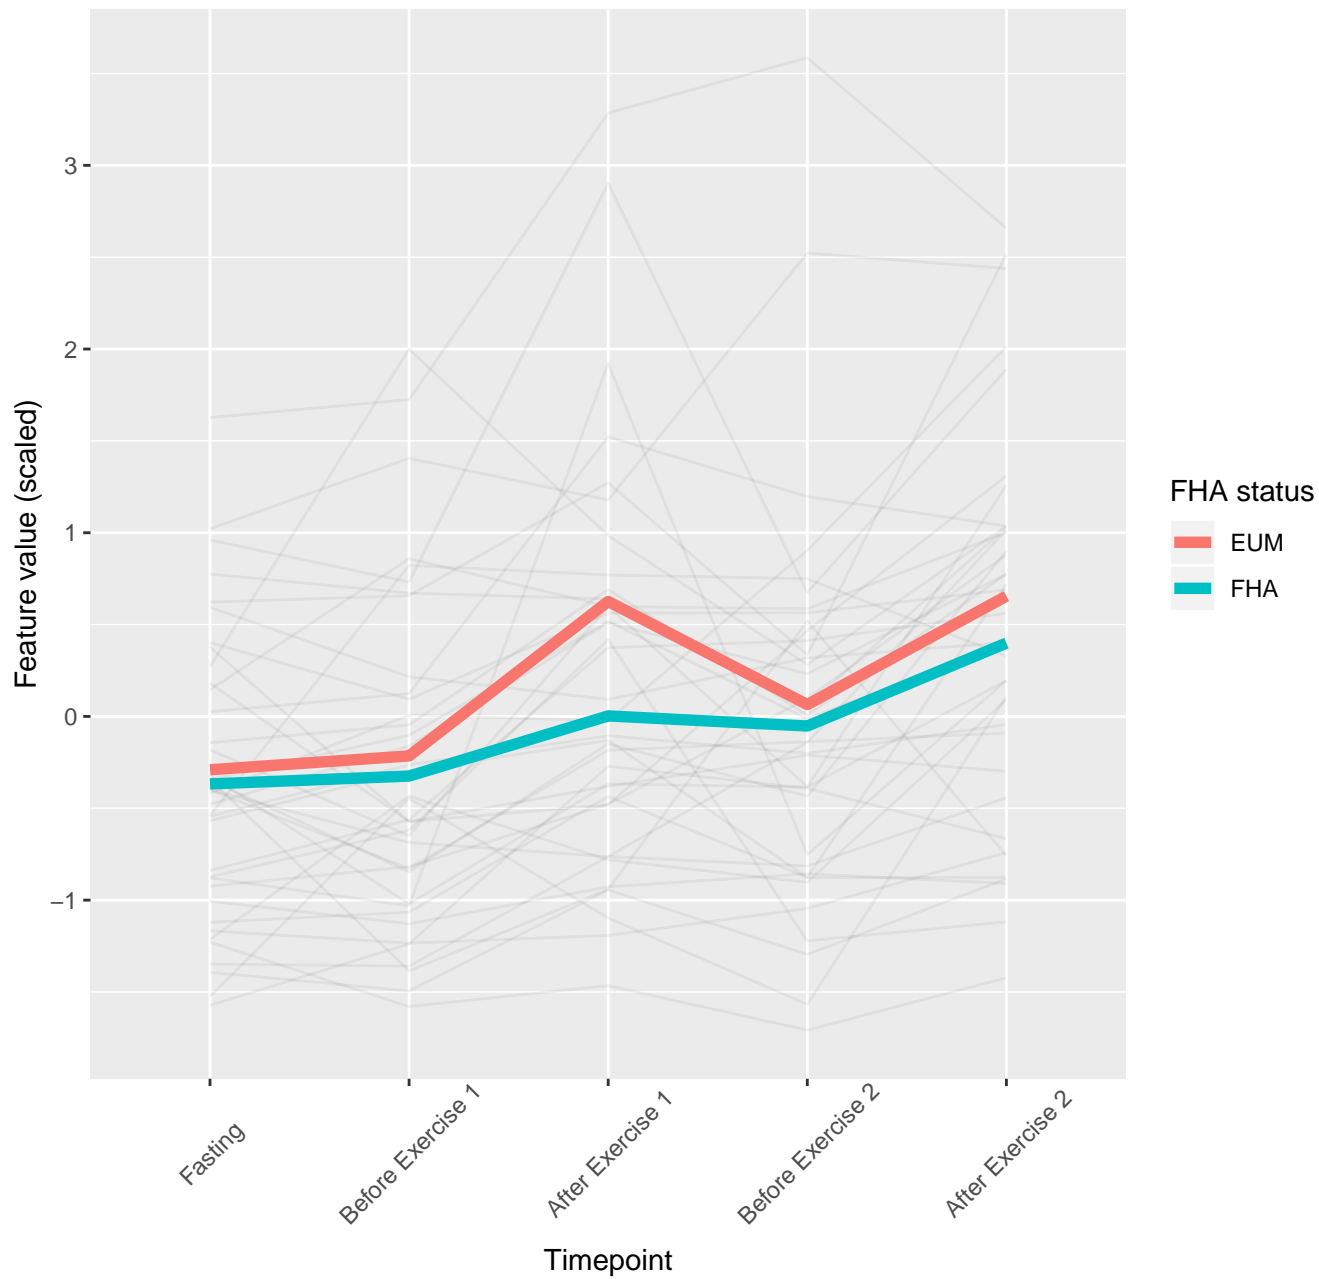

Line plot of TG(51:2).1

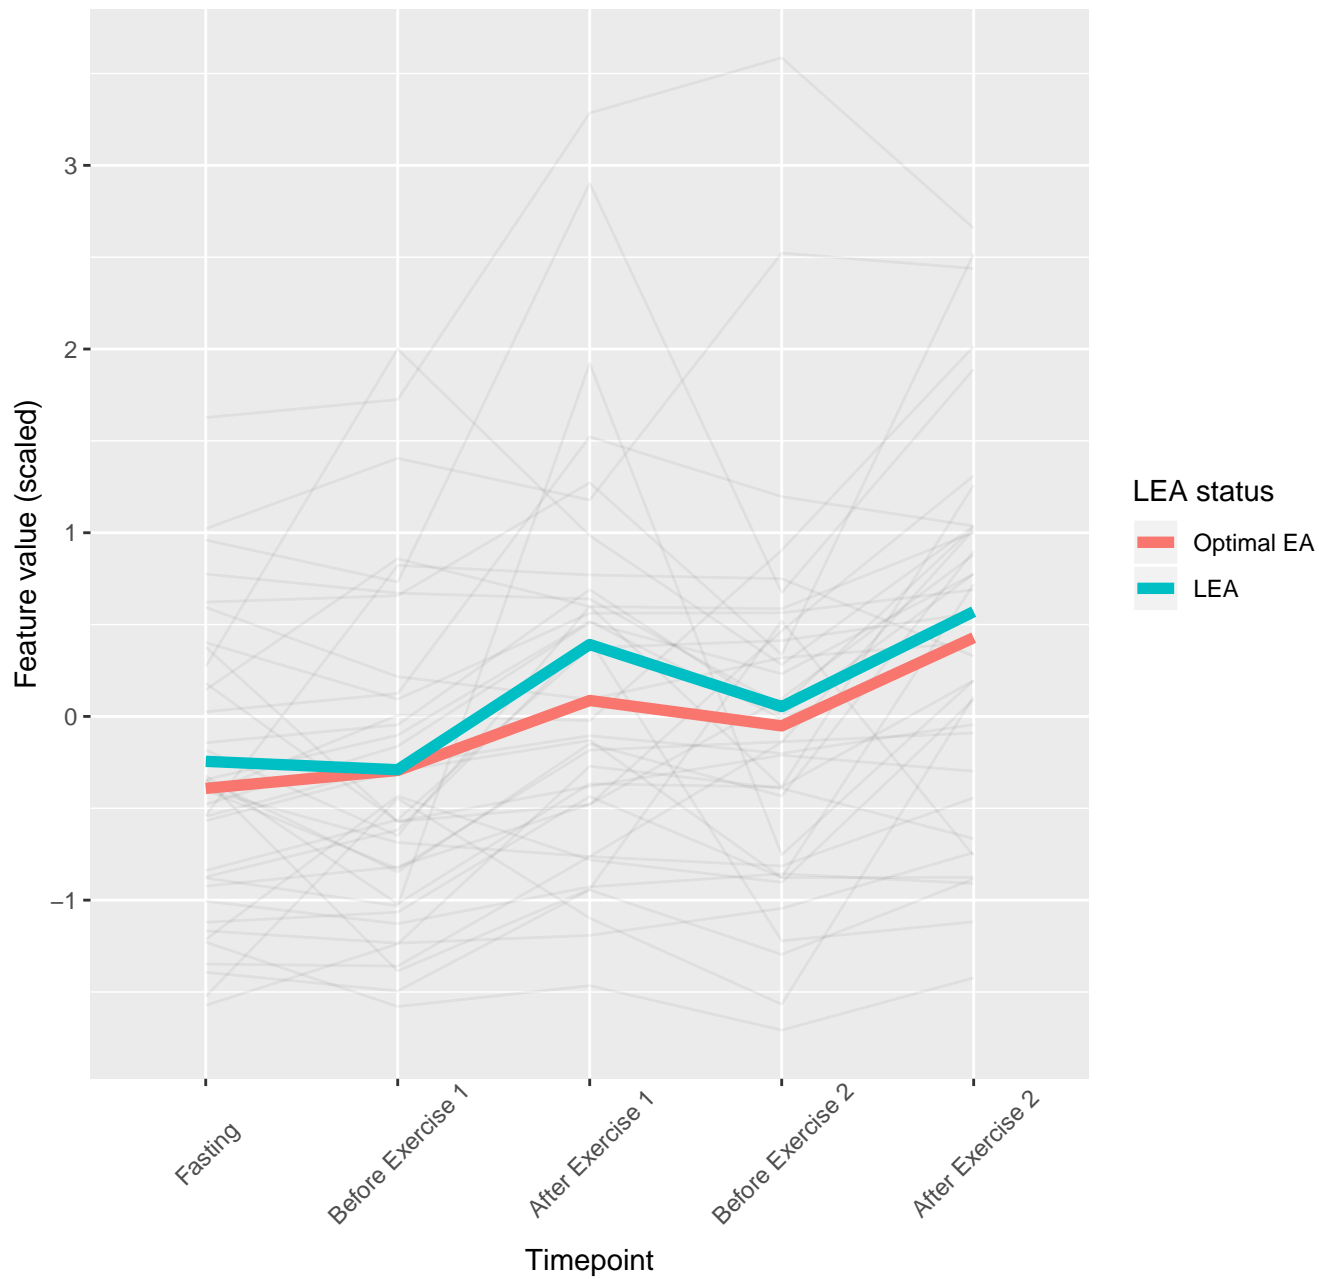

Line plot of TG(51:3)

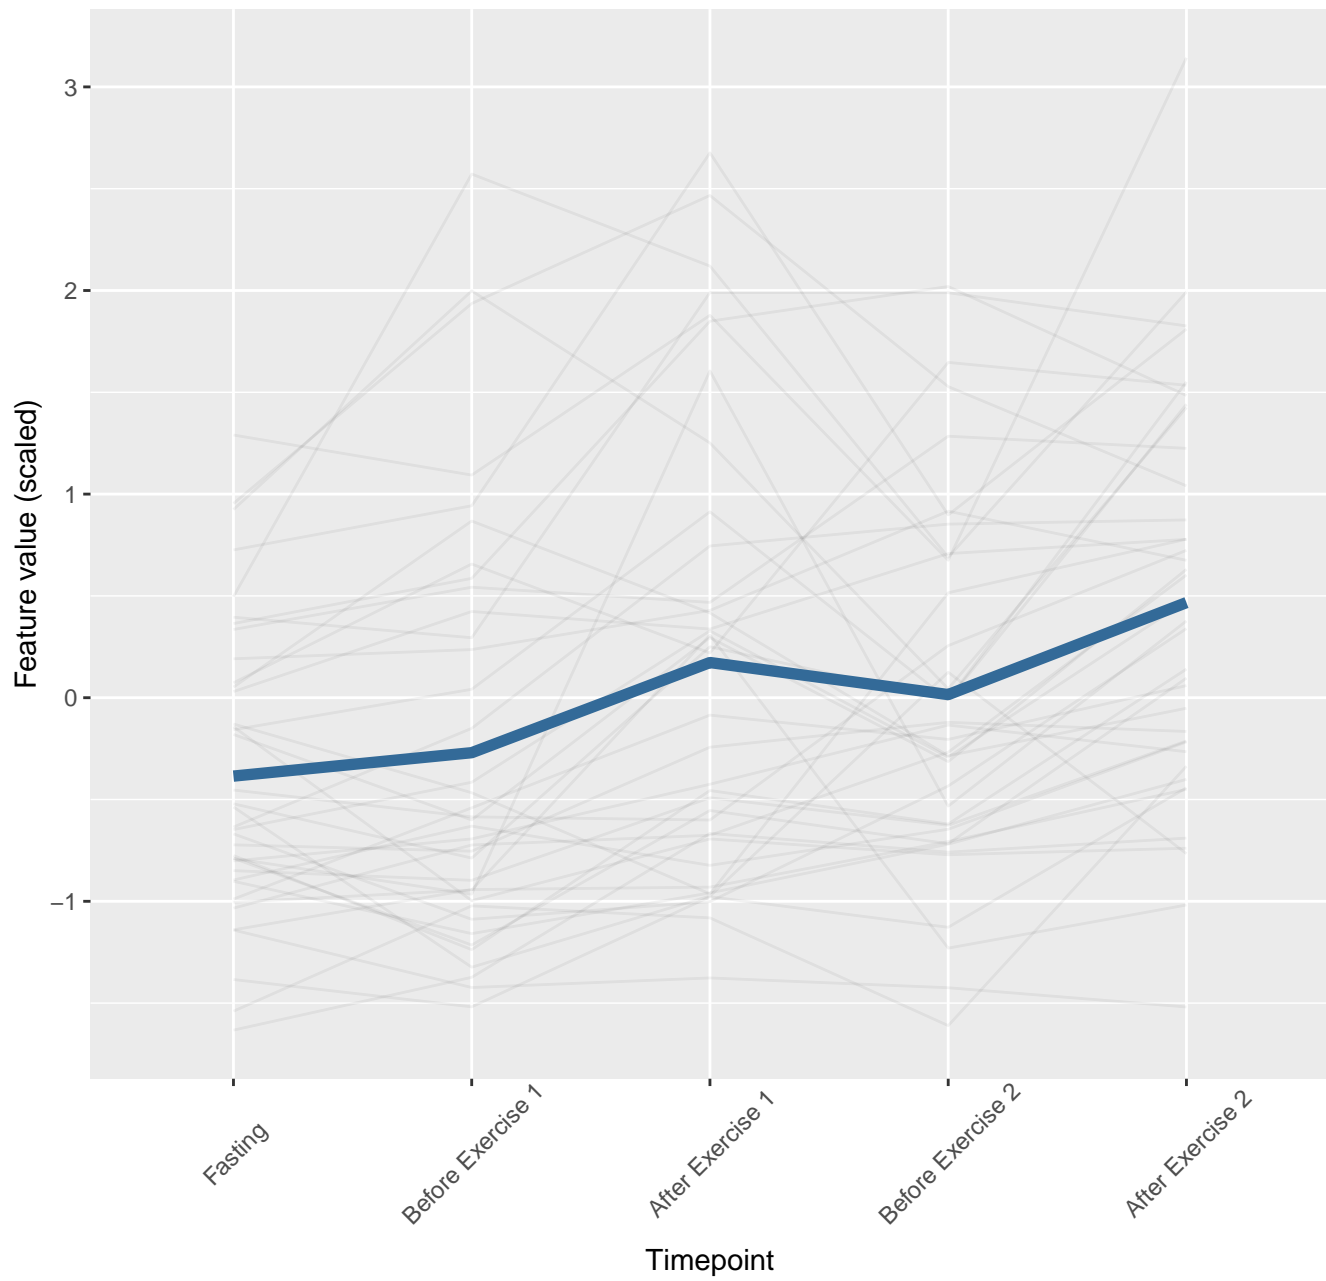

Line plot of TG(51:3)

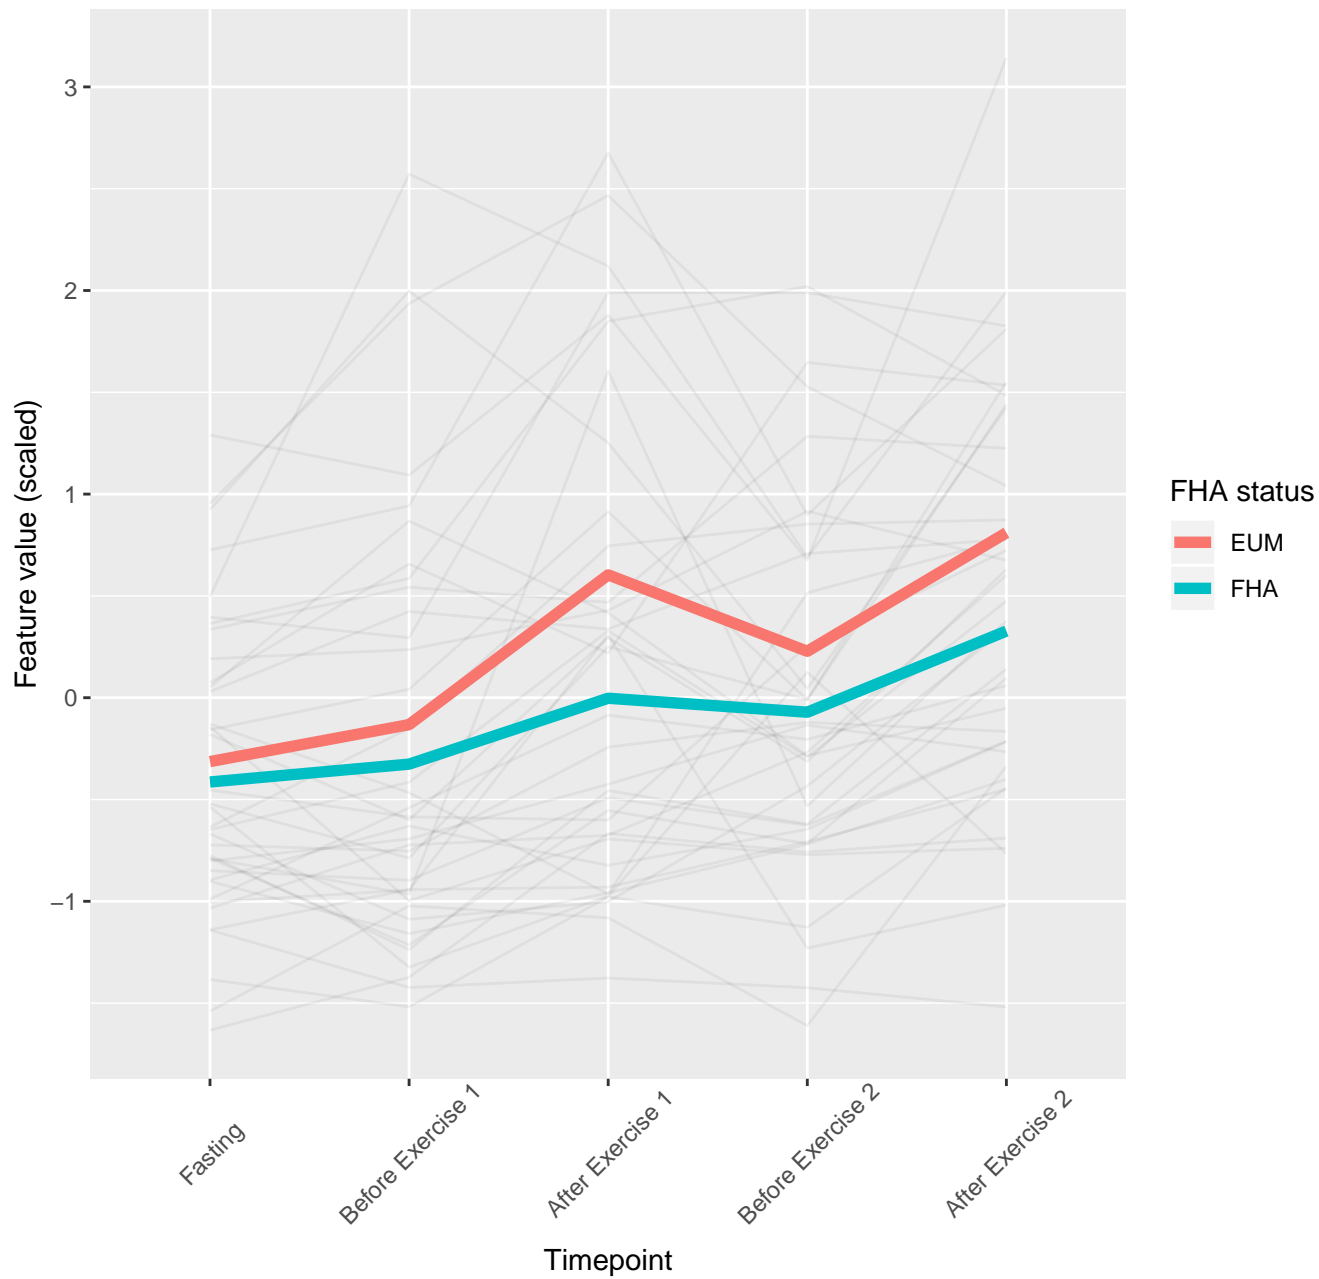



Line plot of TG(51:3)

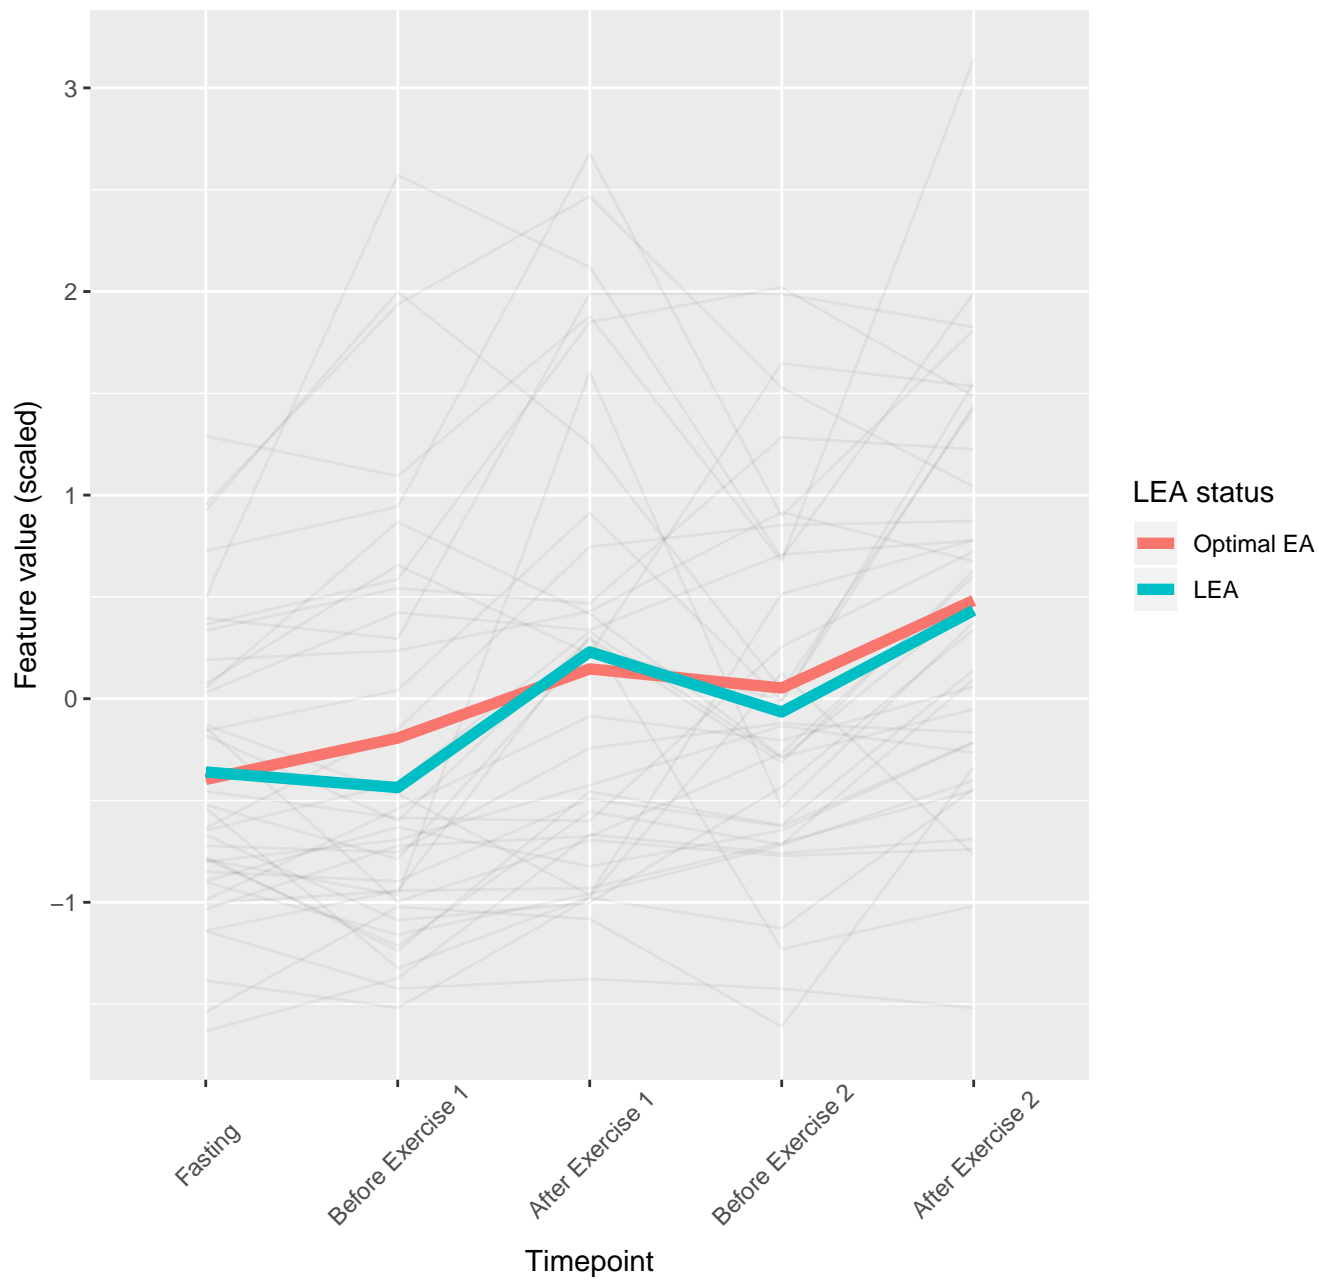

Line plot of TG(51:4)

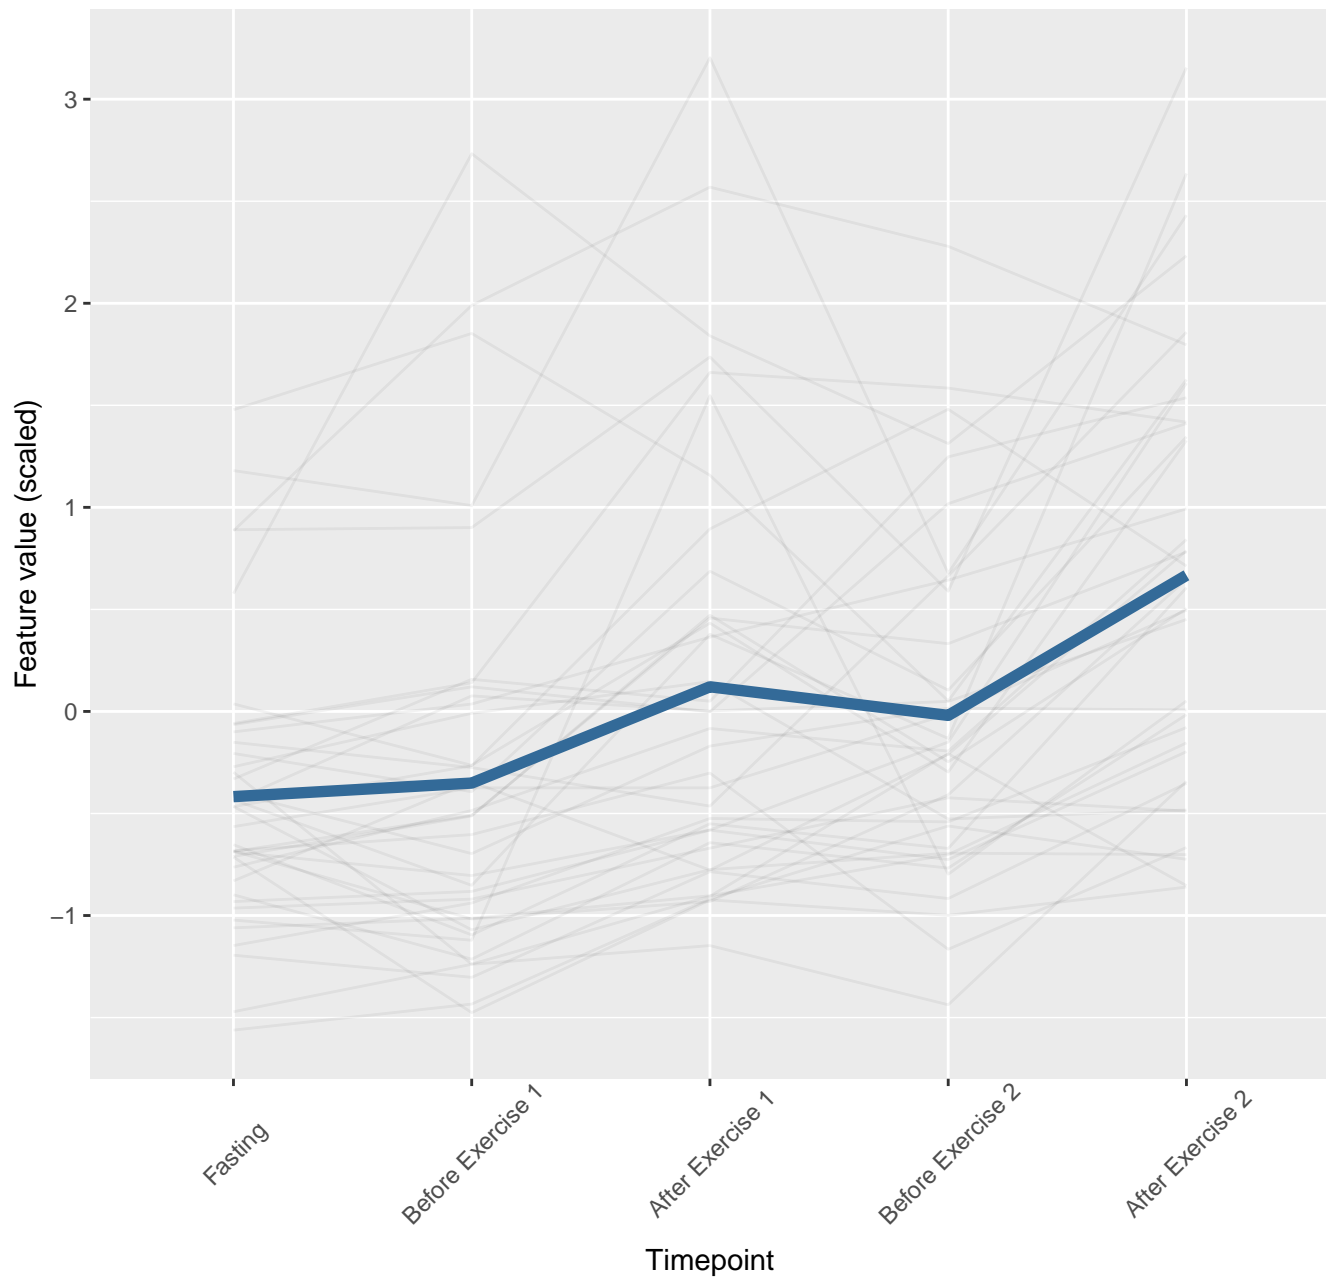

Line plot of TG(51:4)

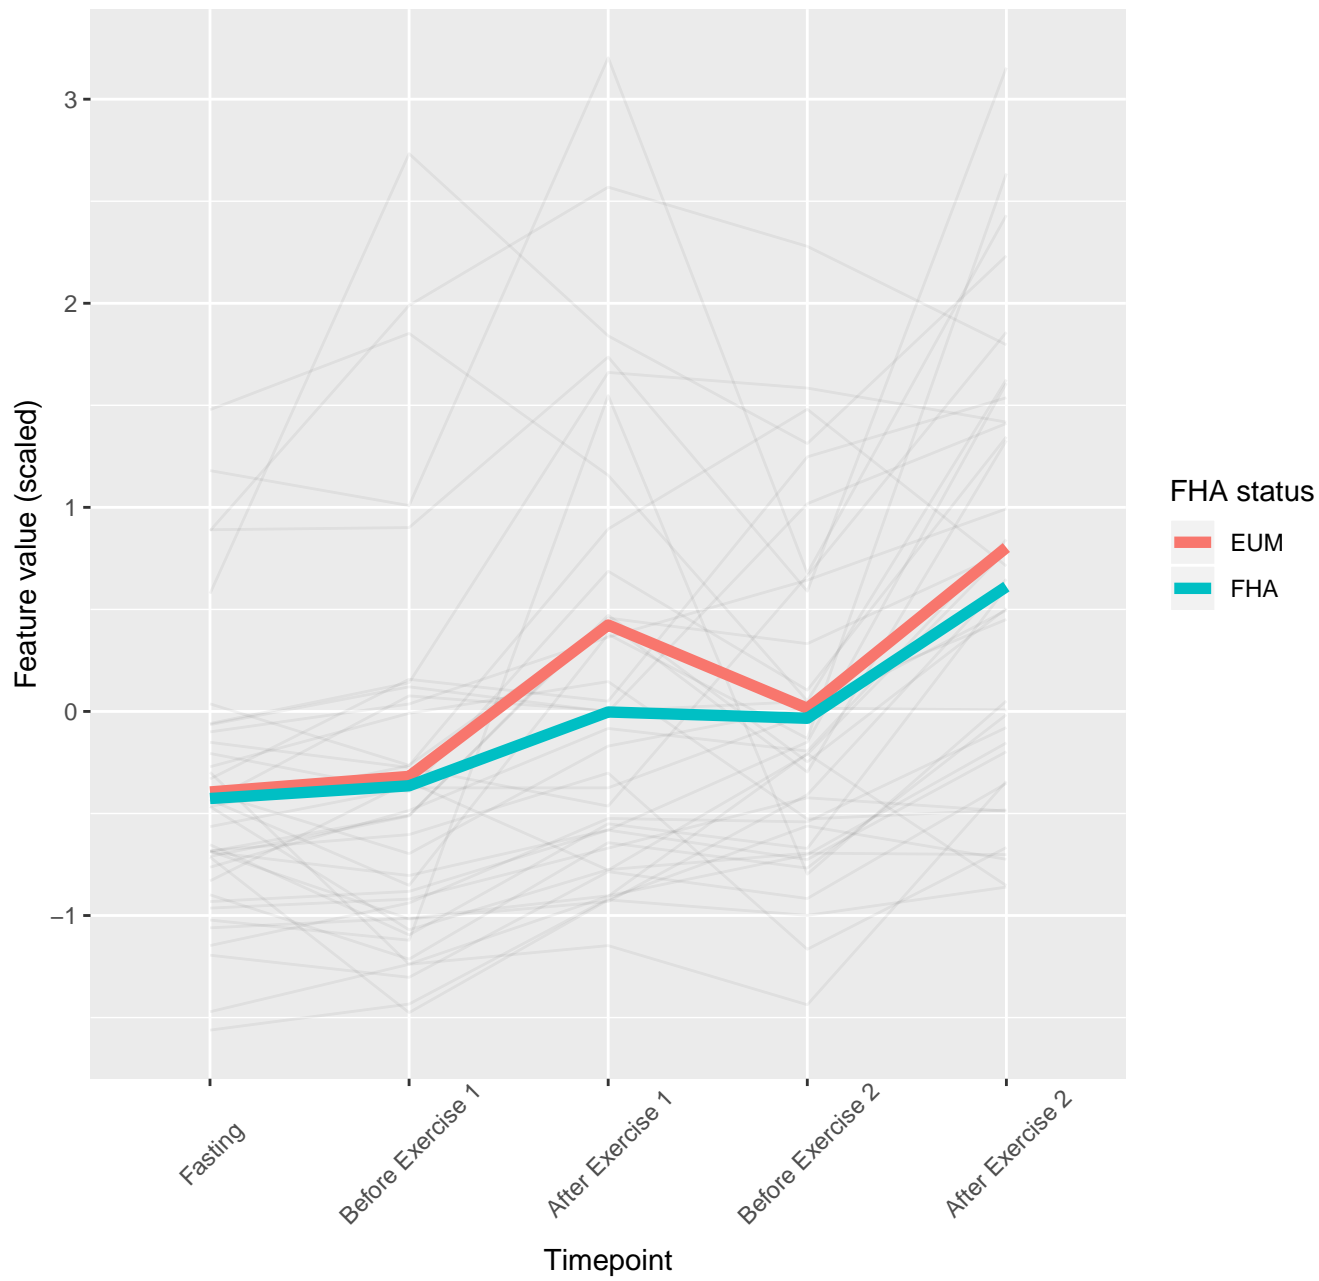

Line plot of TG(51:4)

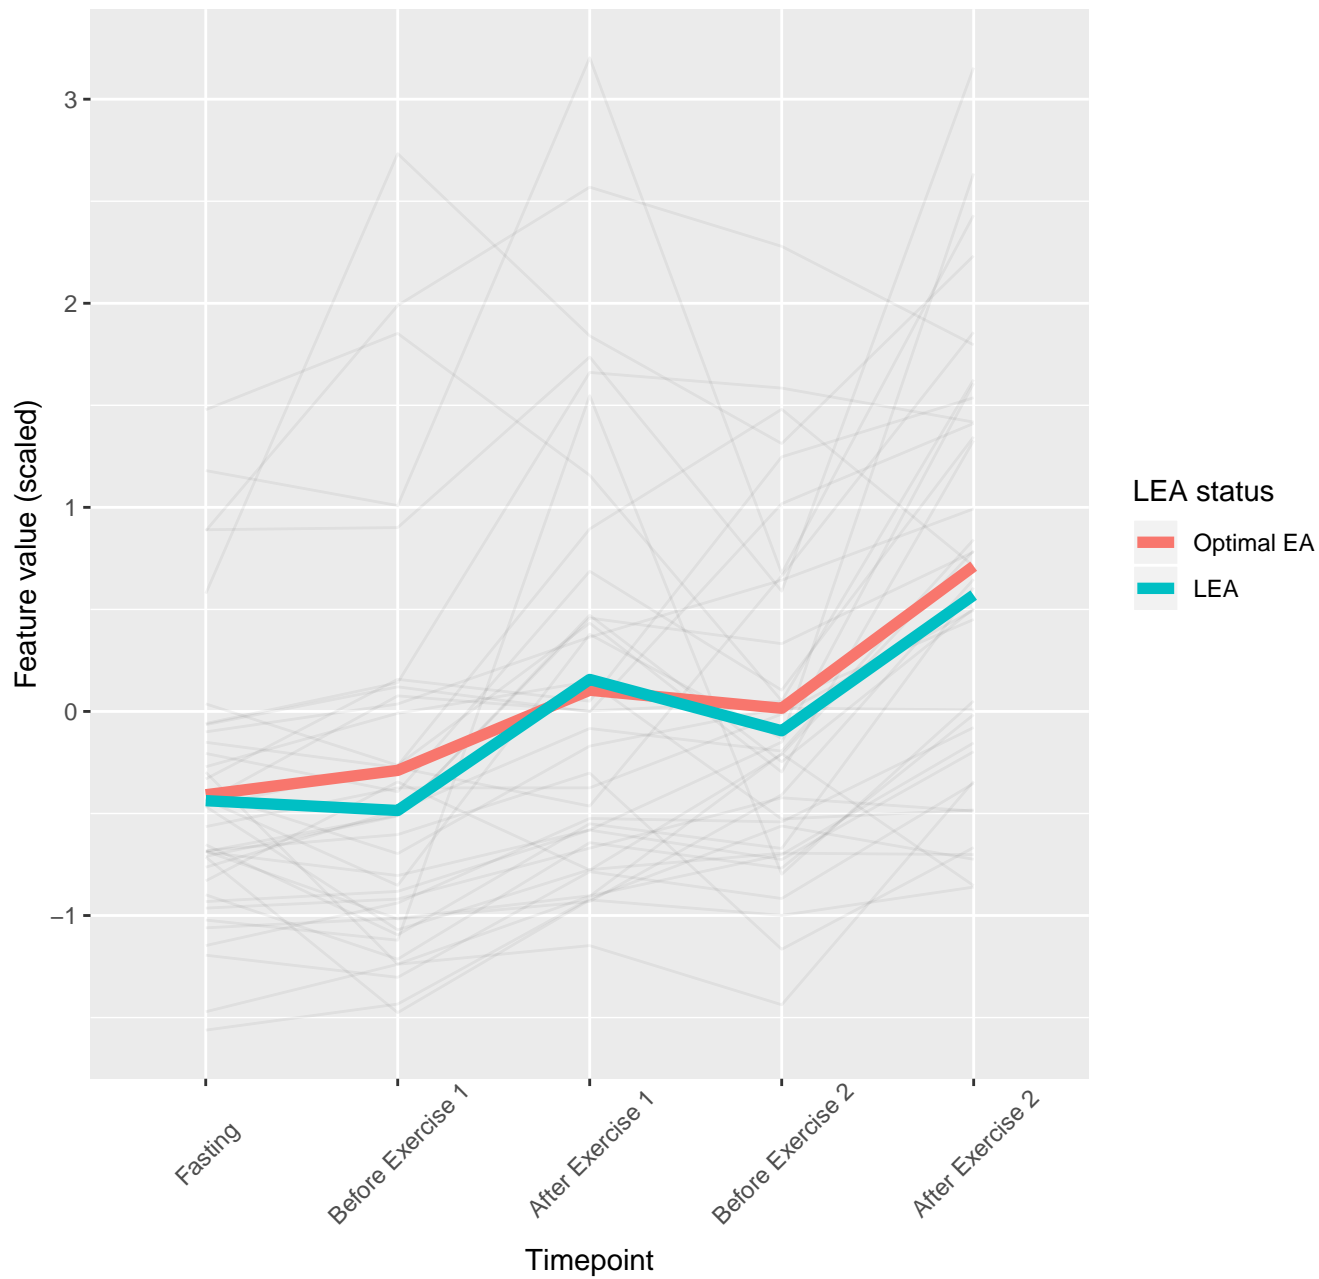

Line plot of TG(52:0)

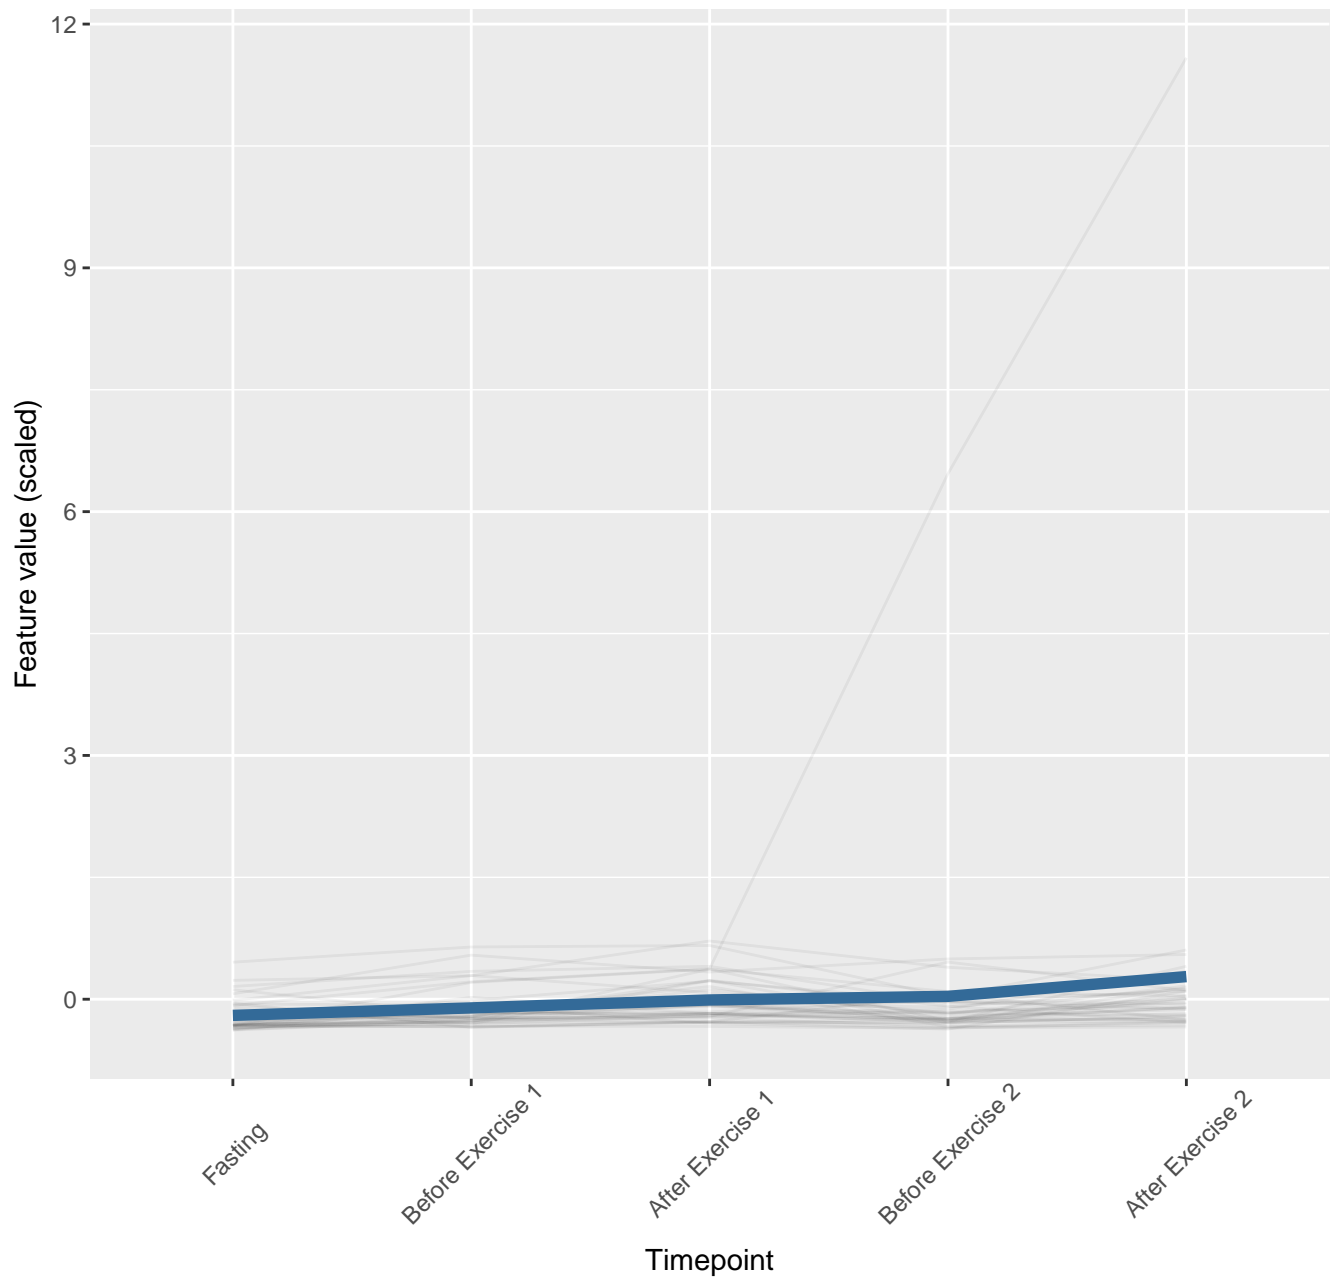

Line plot of TG(52:0)

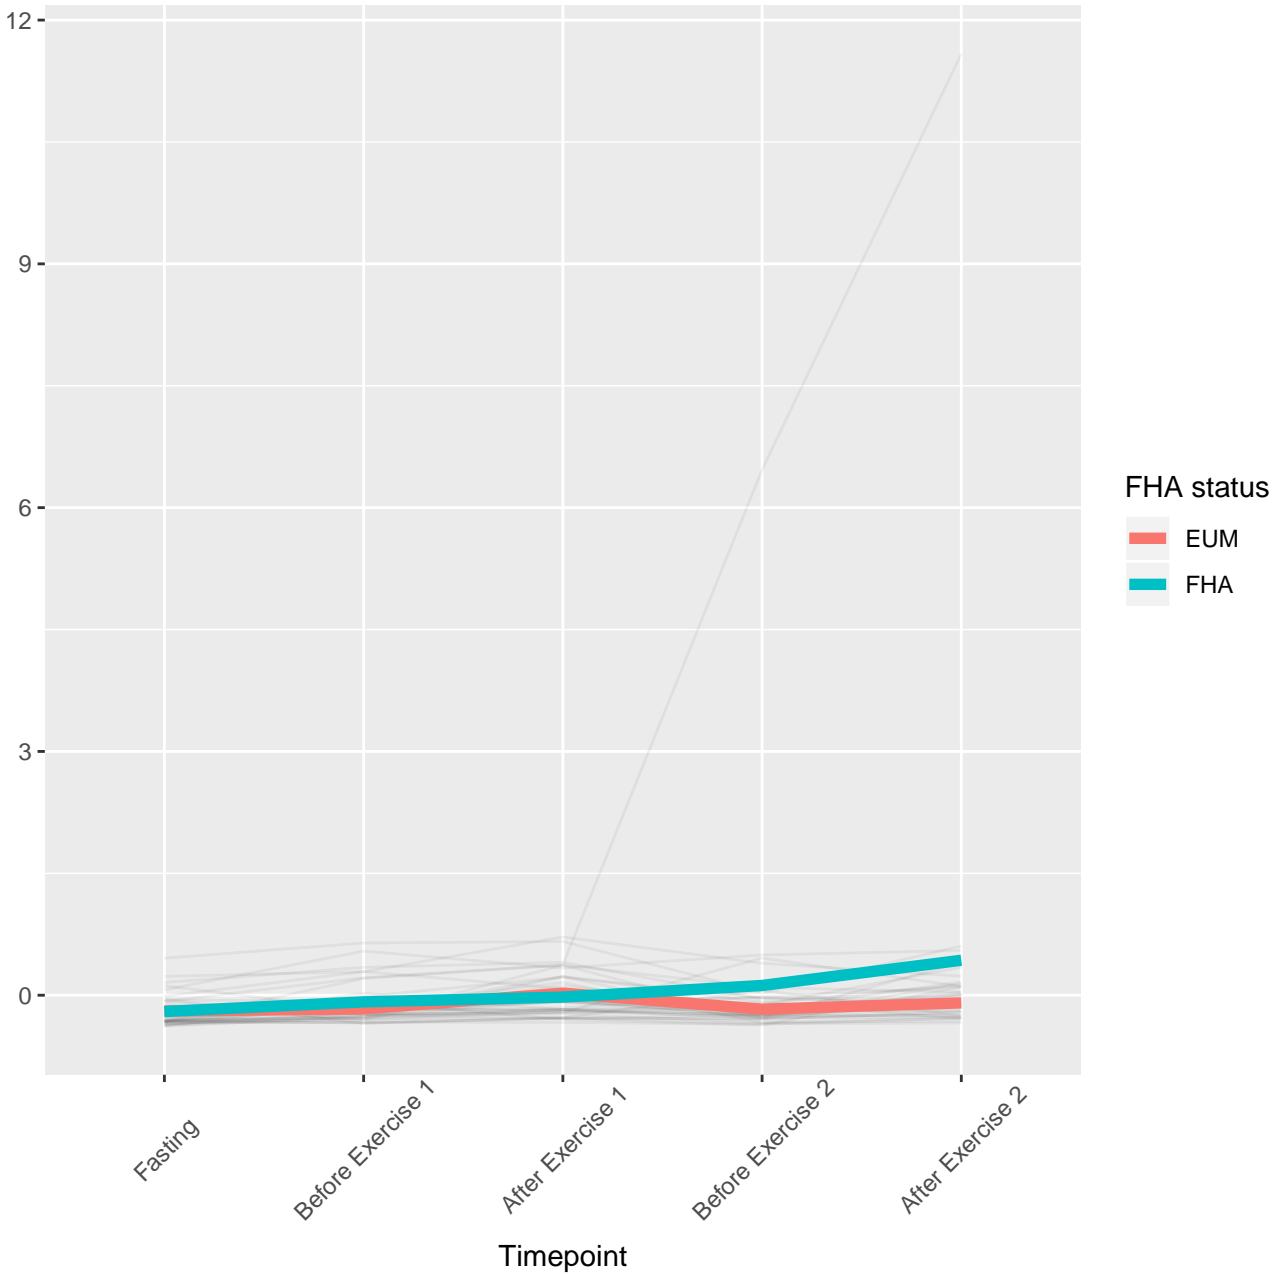

Line plot of TG(52:0)

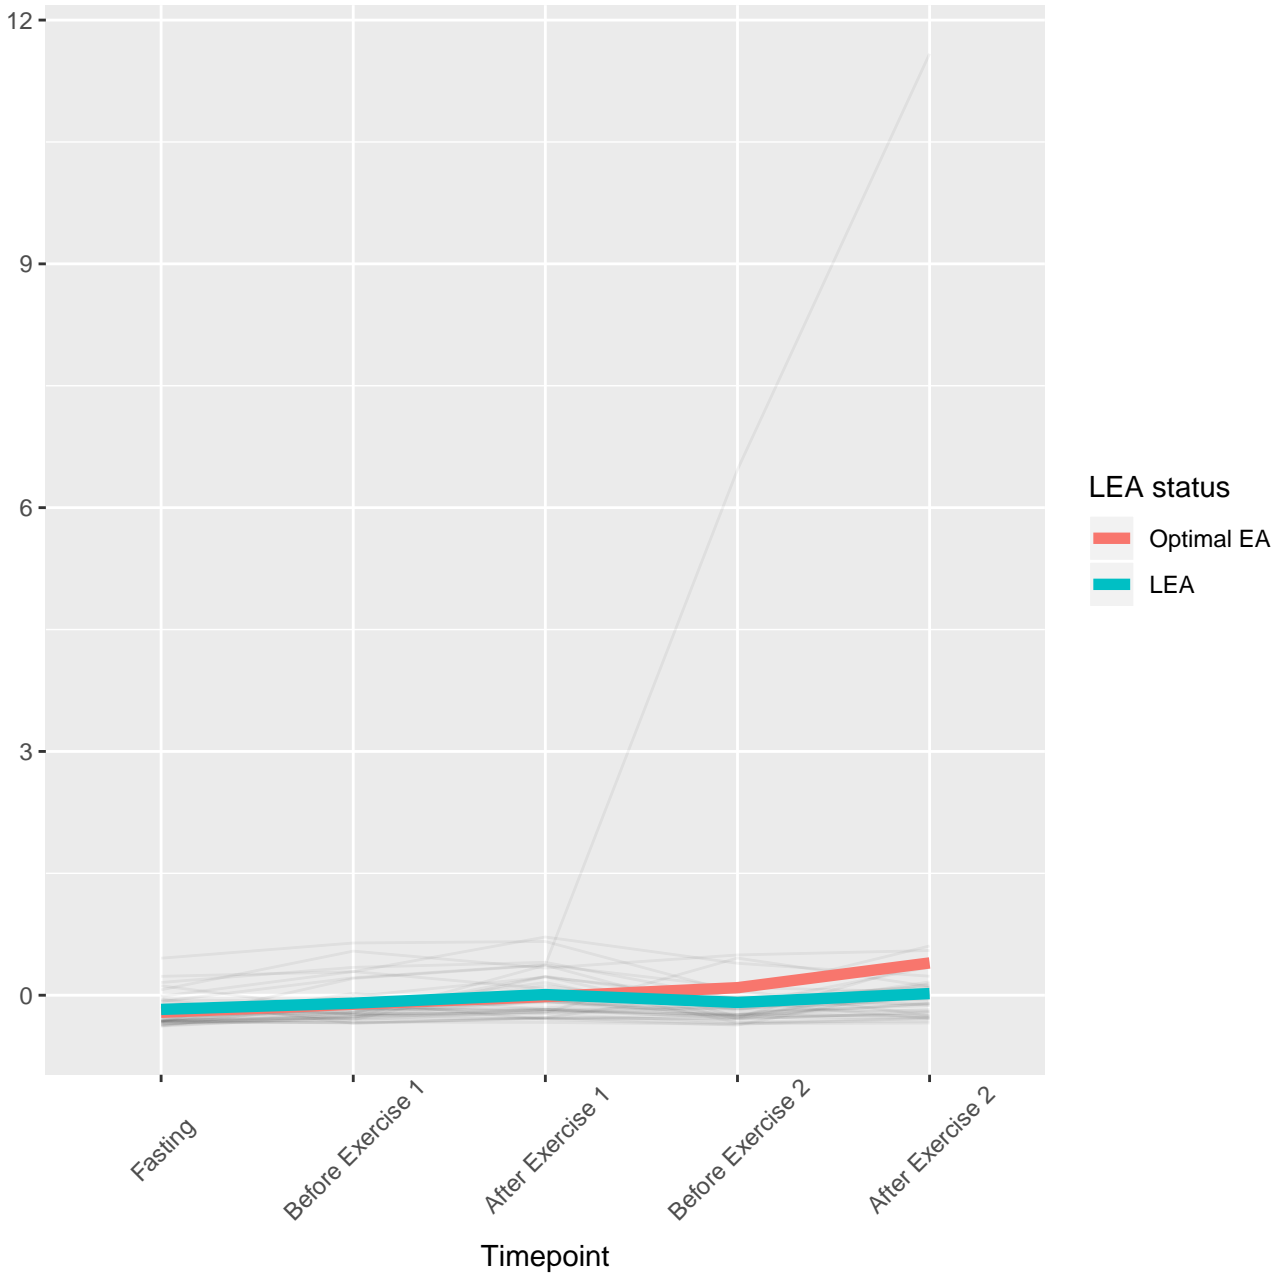

Line plot of TG(52:1)

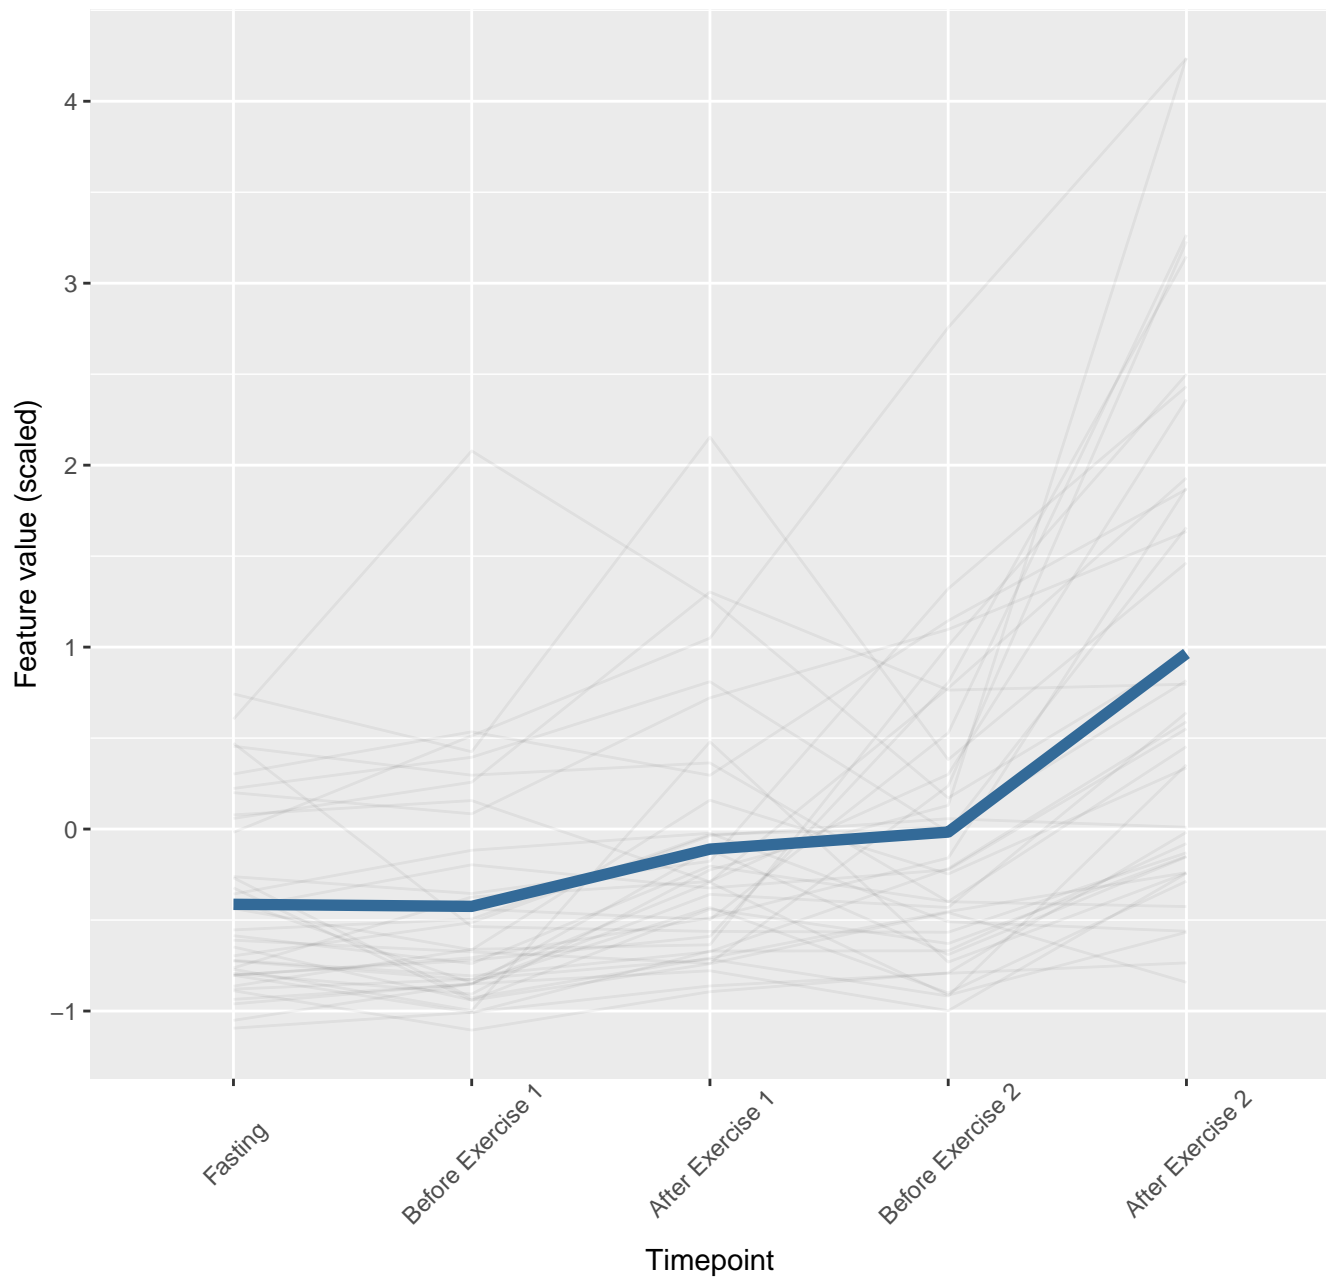



Line plot of TG(52:1)

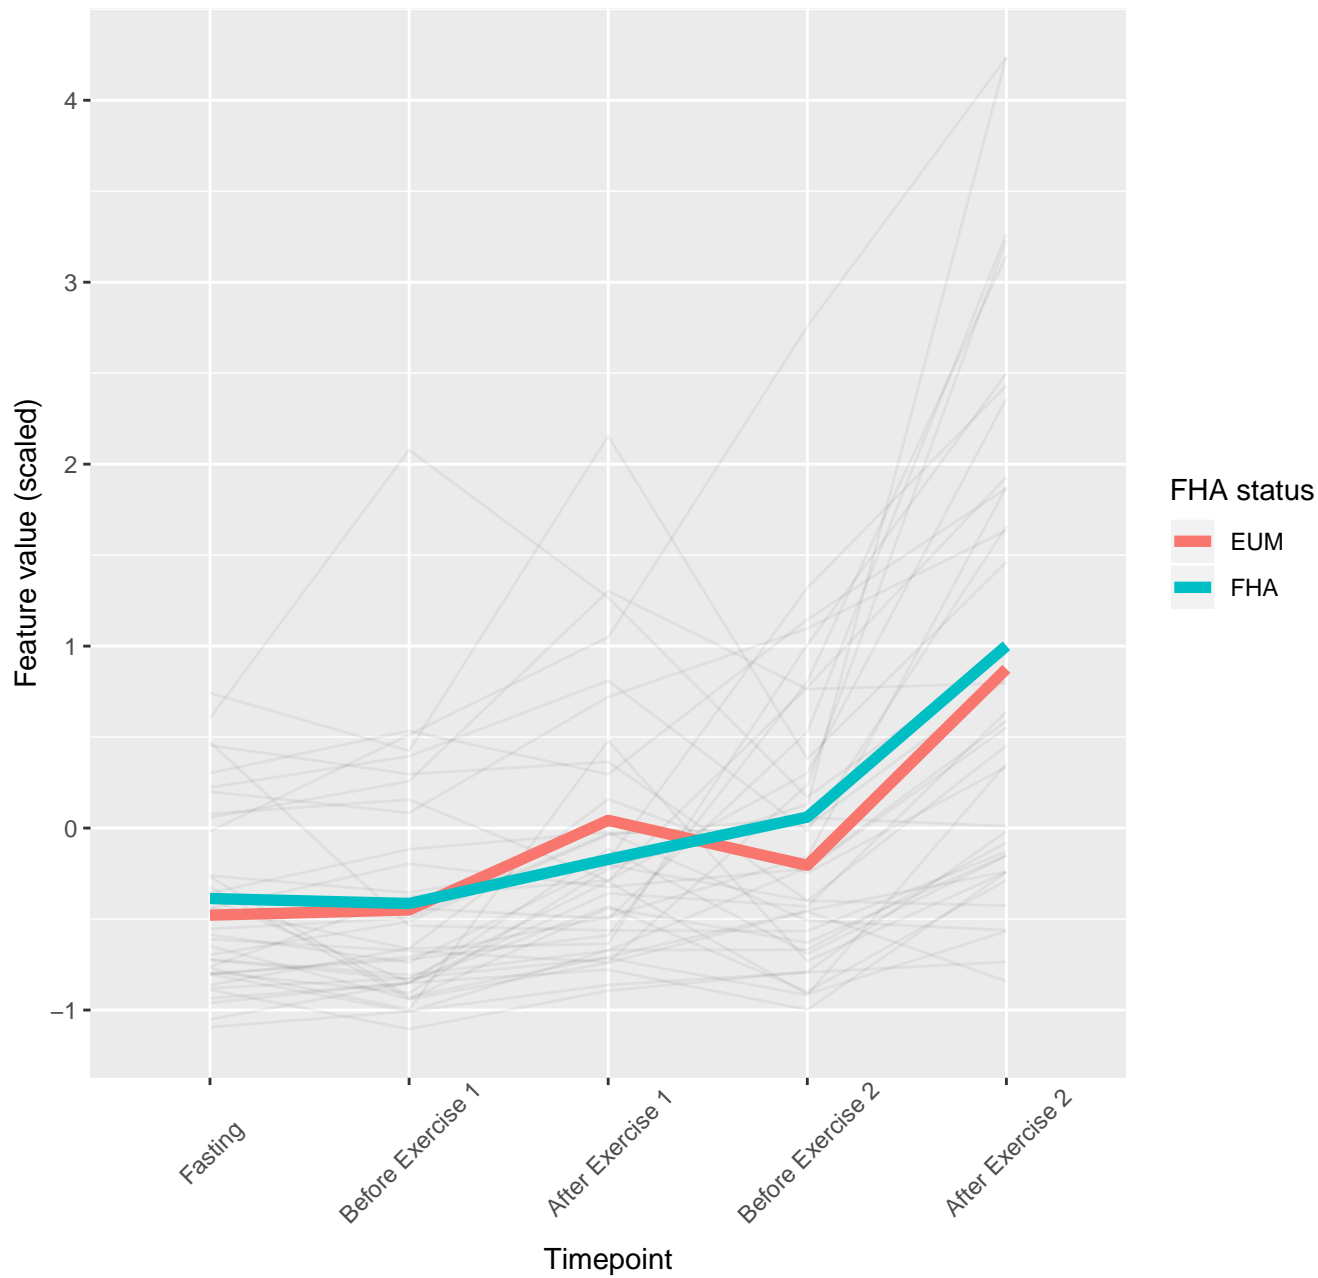

Line plot of TG(52:1)

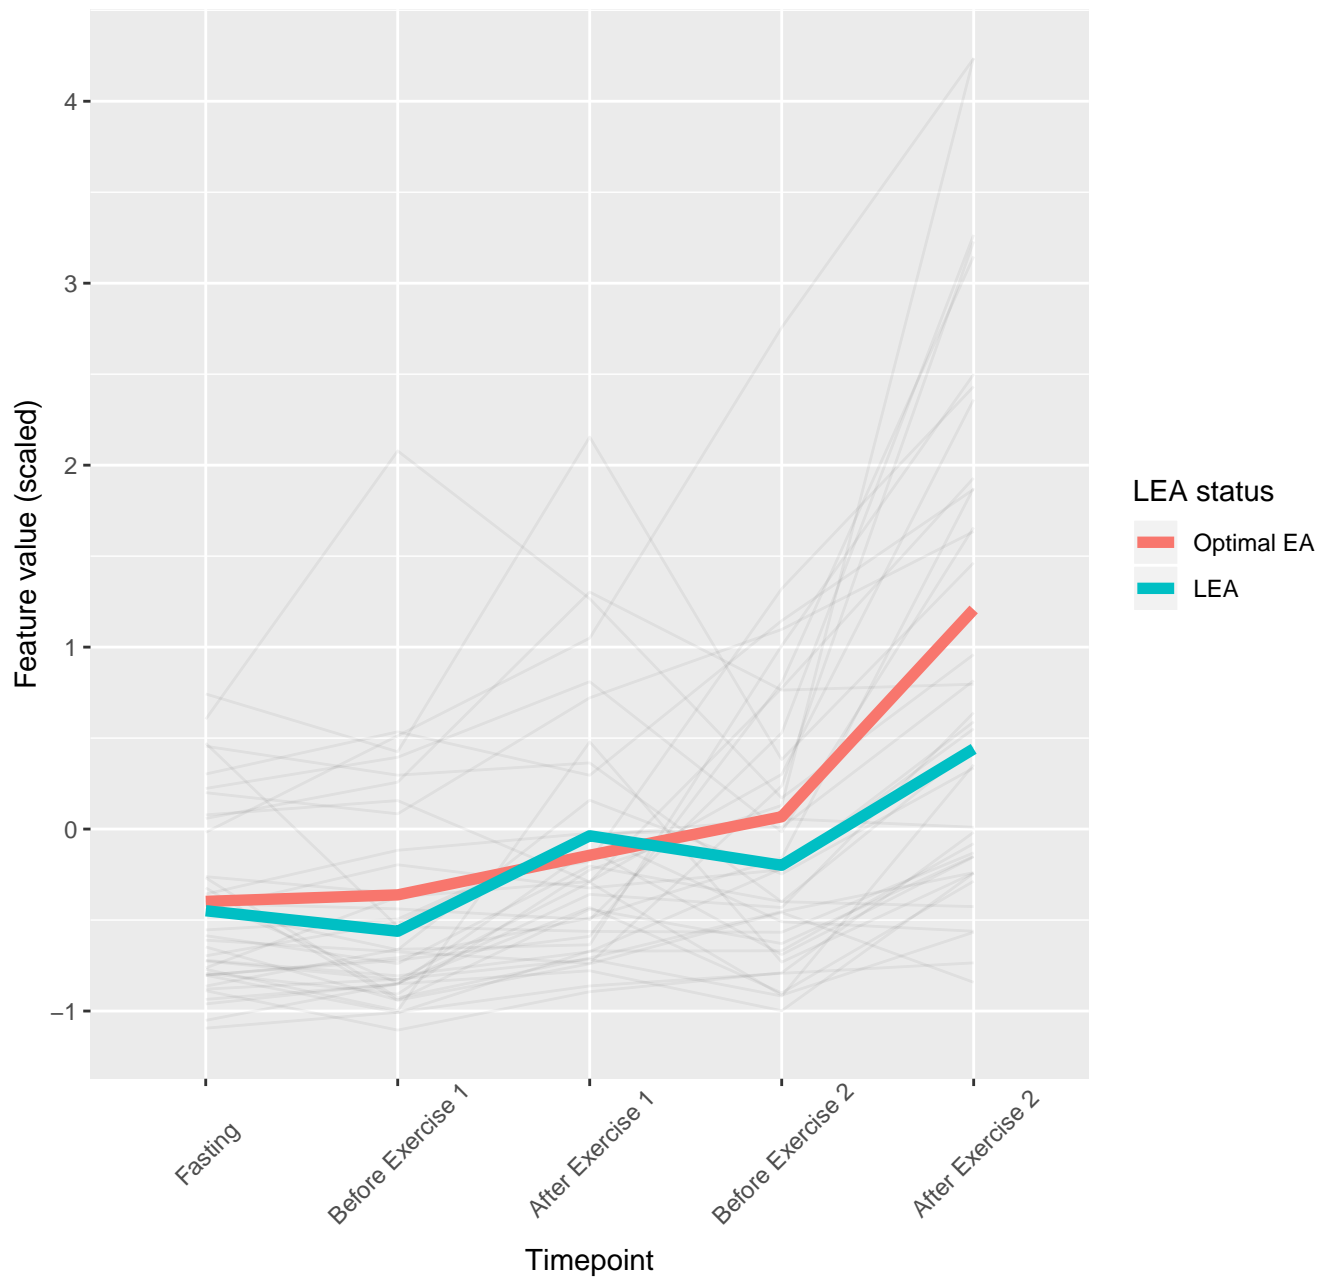

Line plot of TG(52:2)

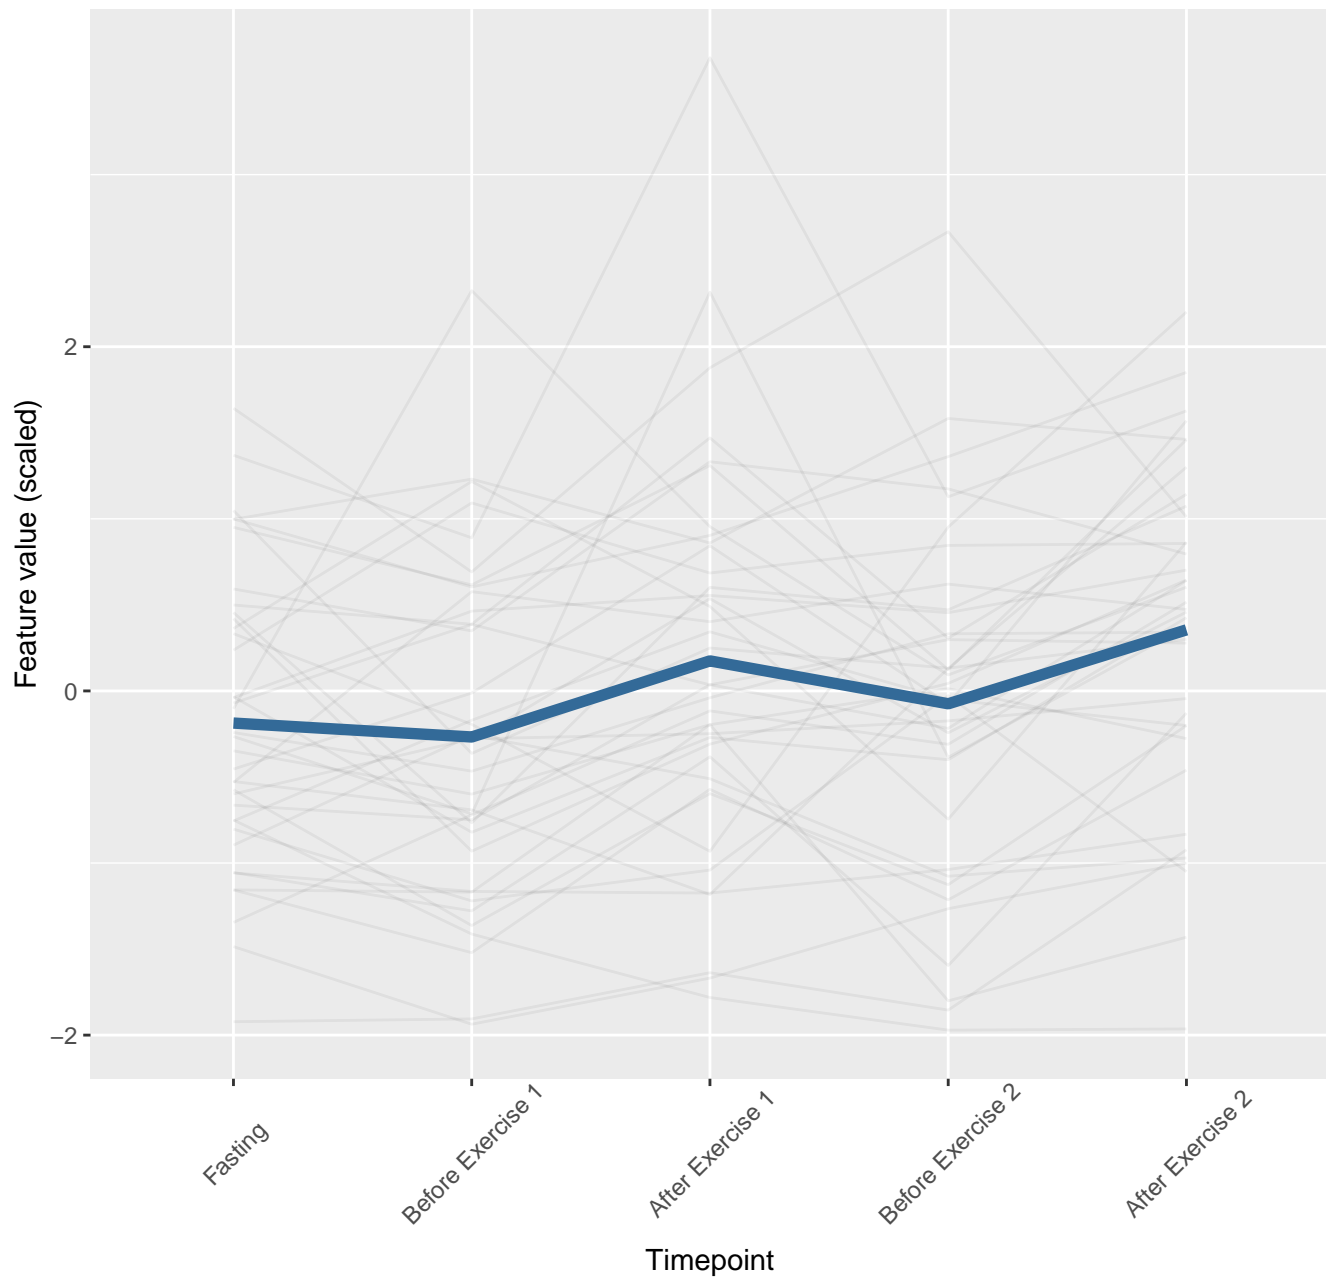

Line plot of TG(52:2)

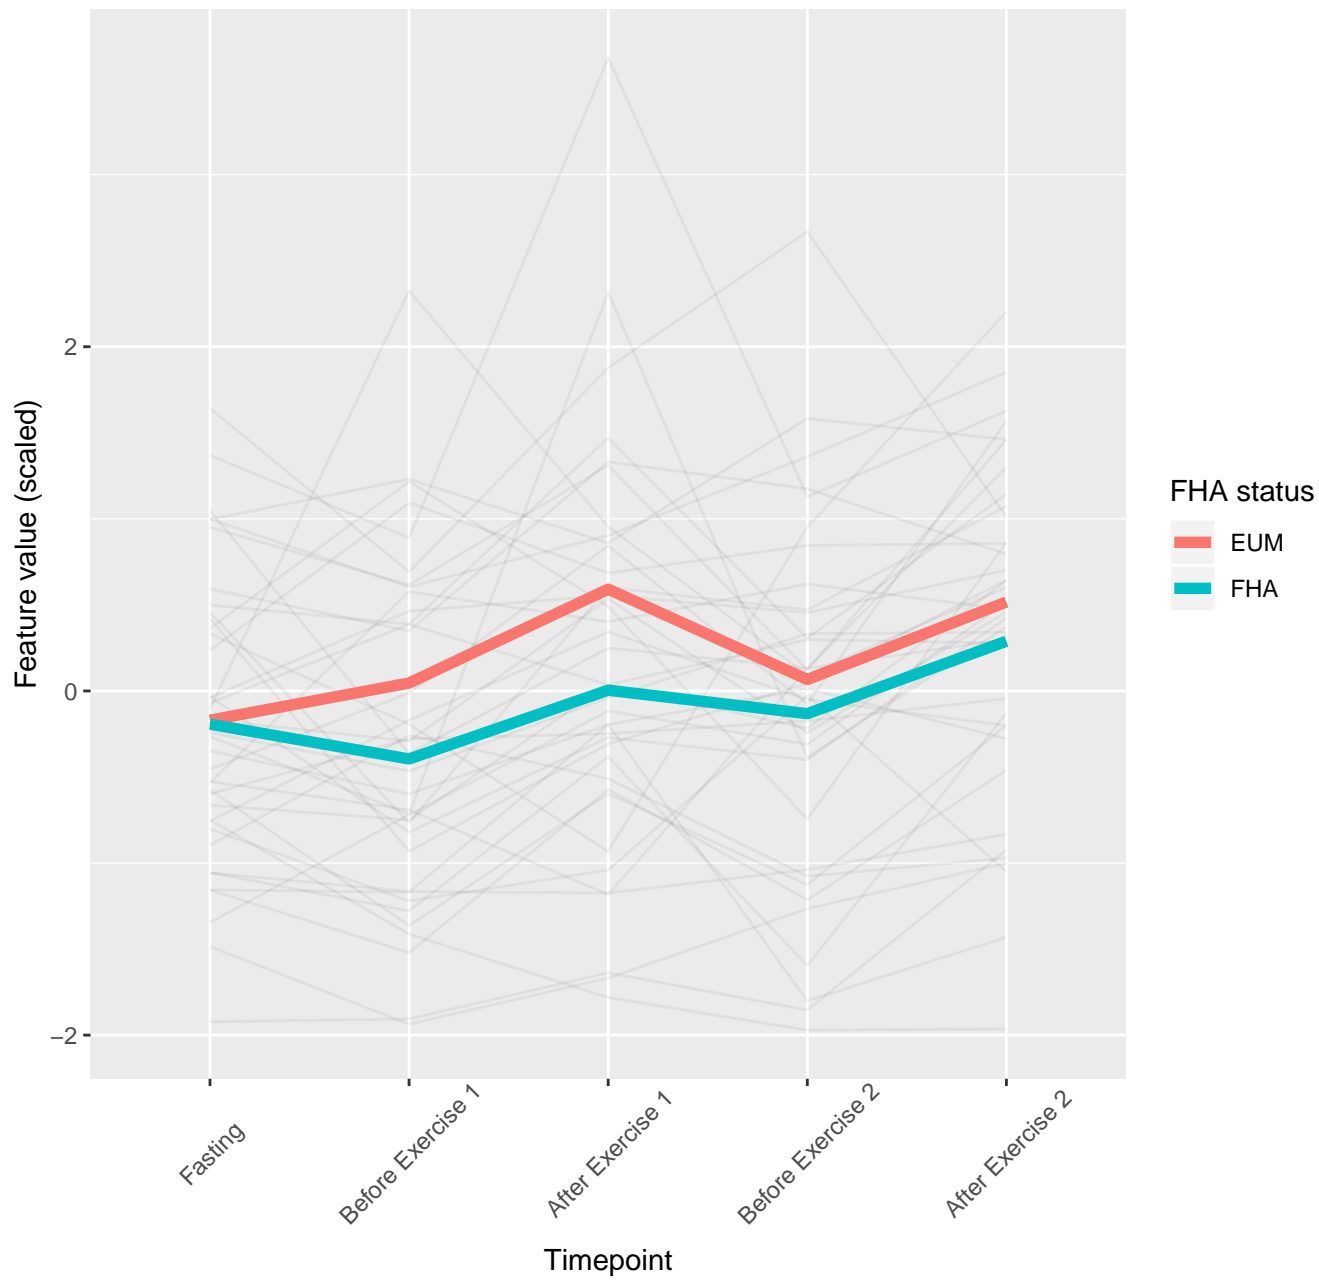

Line plot of TG(52:2)

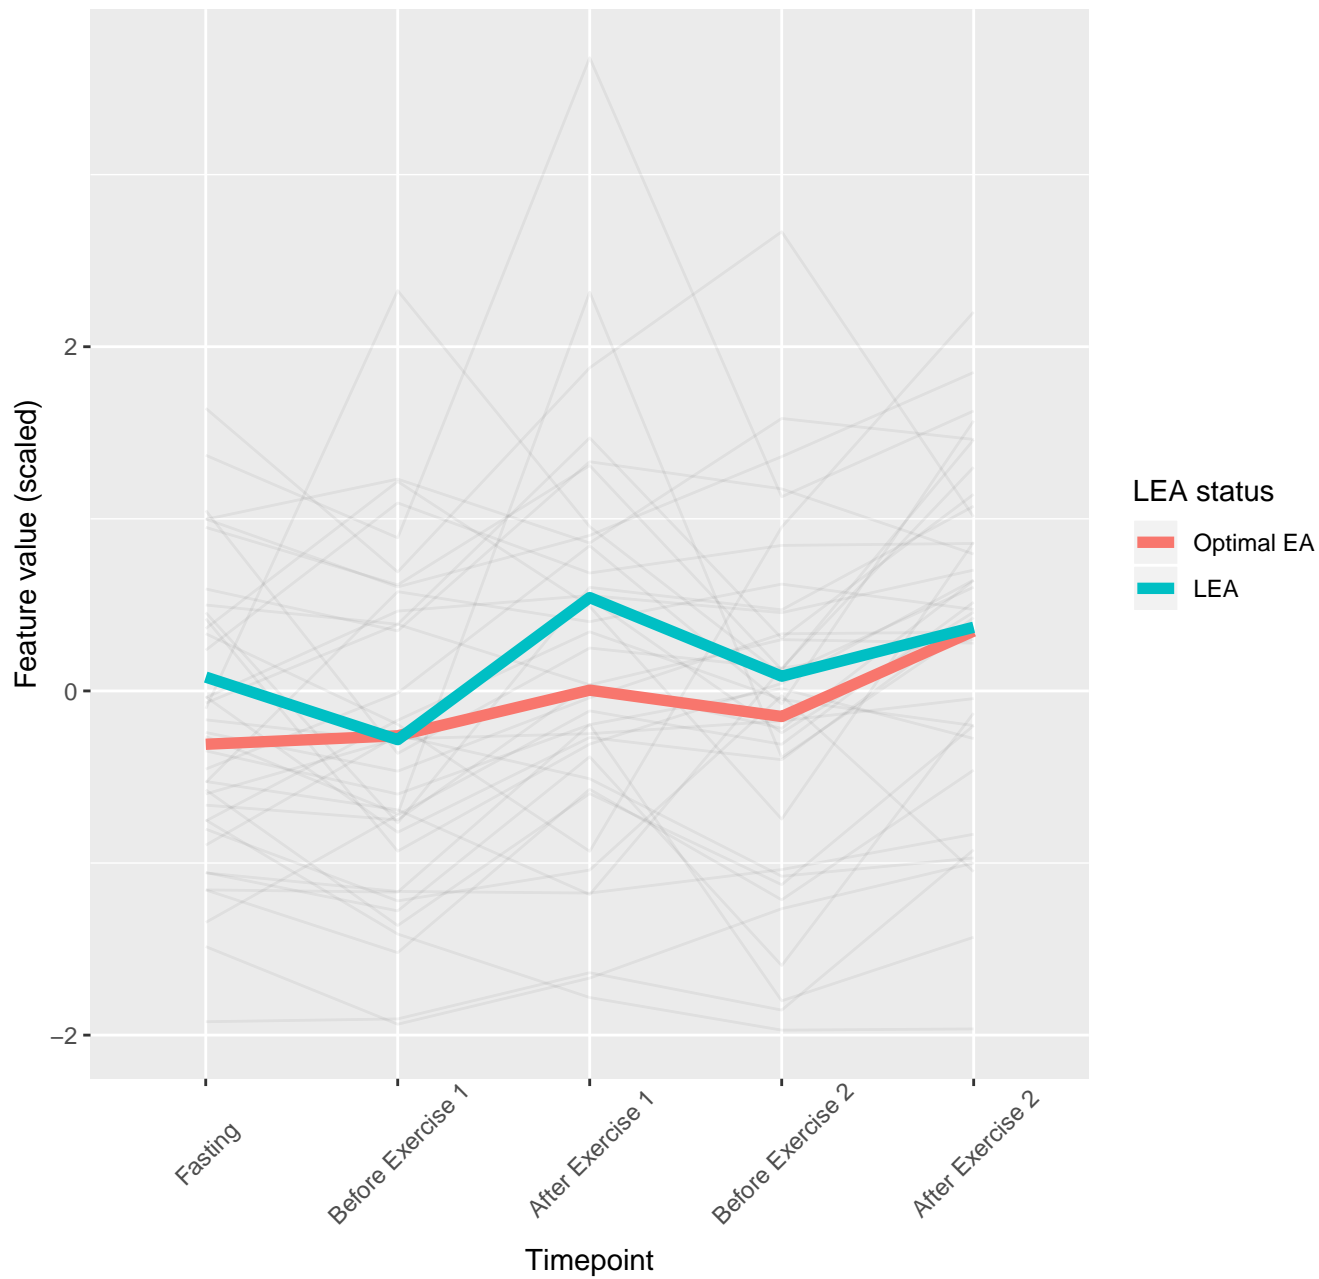

Line plot of TG(52:3)

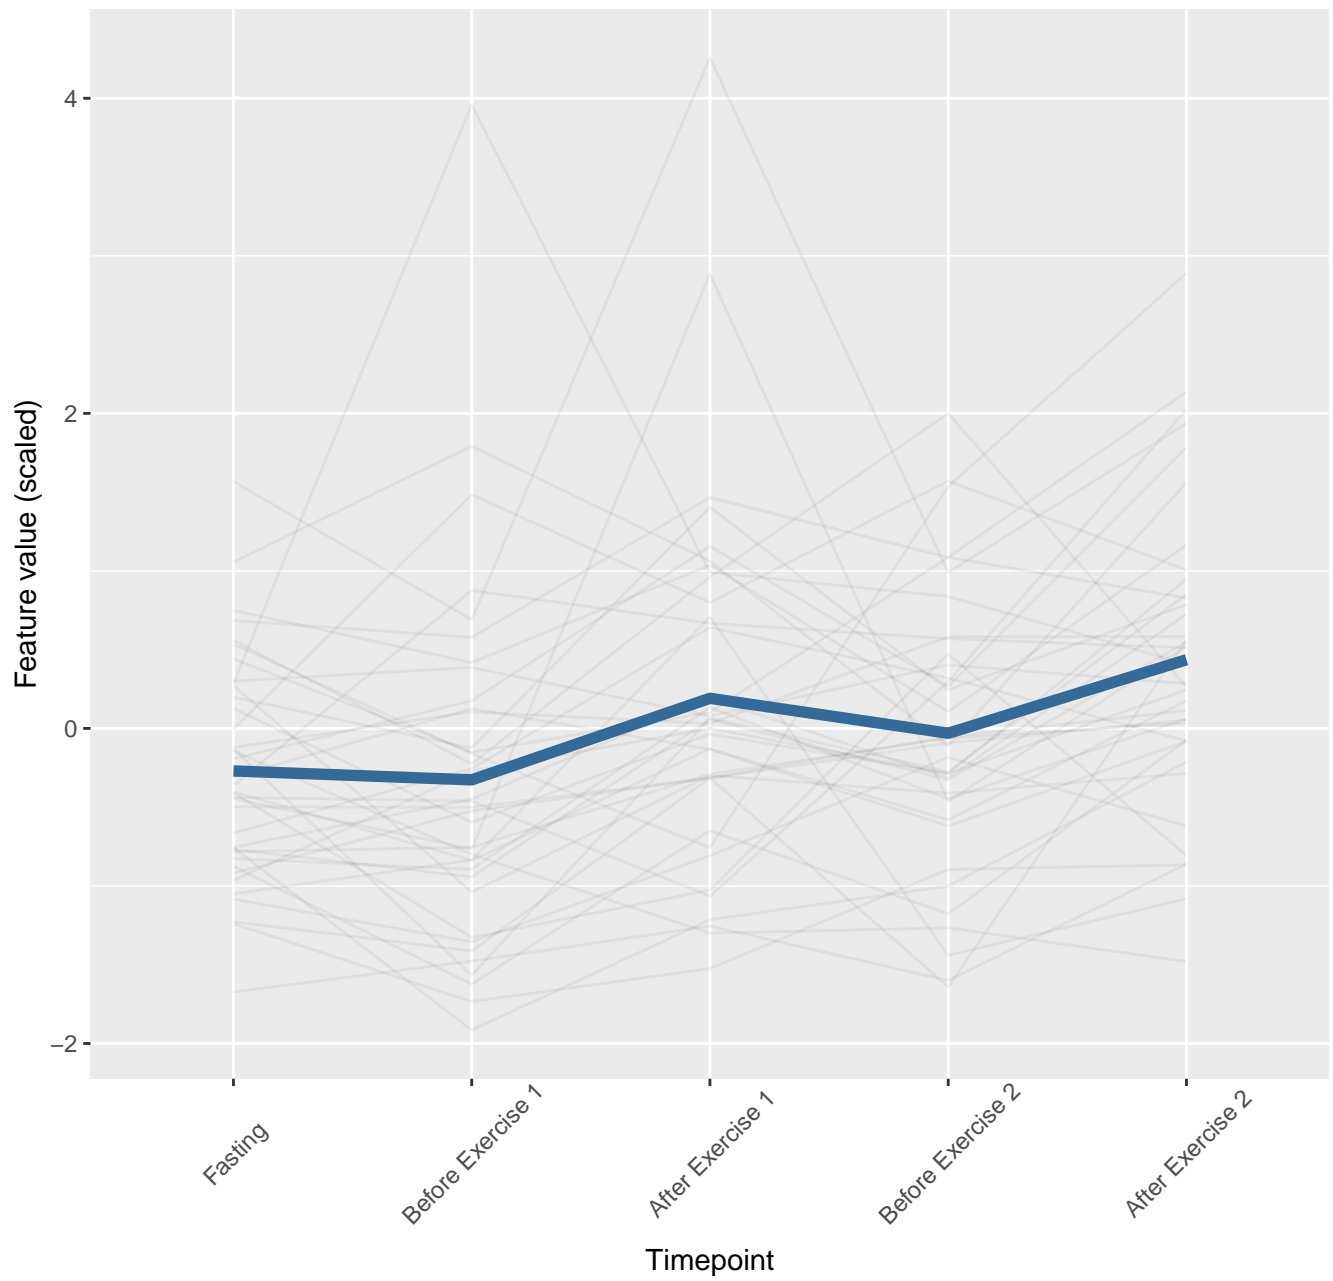

Line plot of TG(52:3)

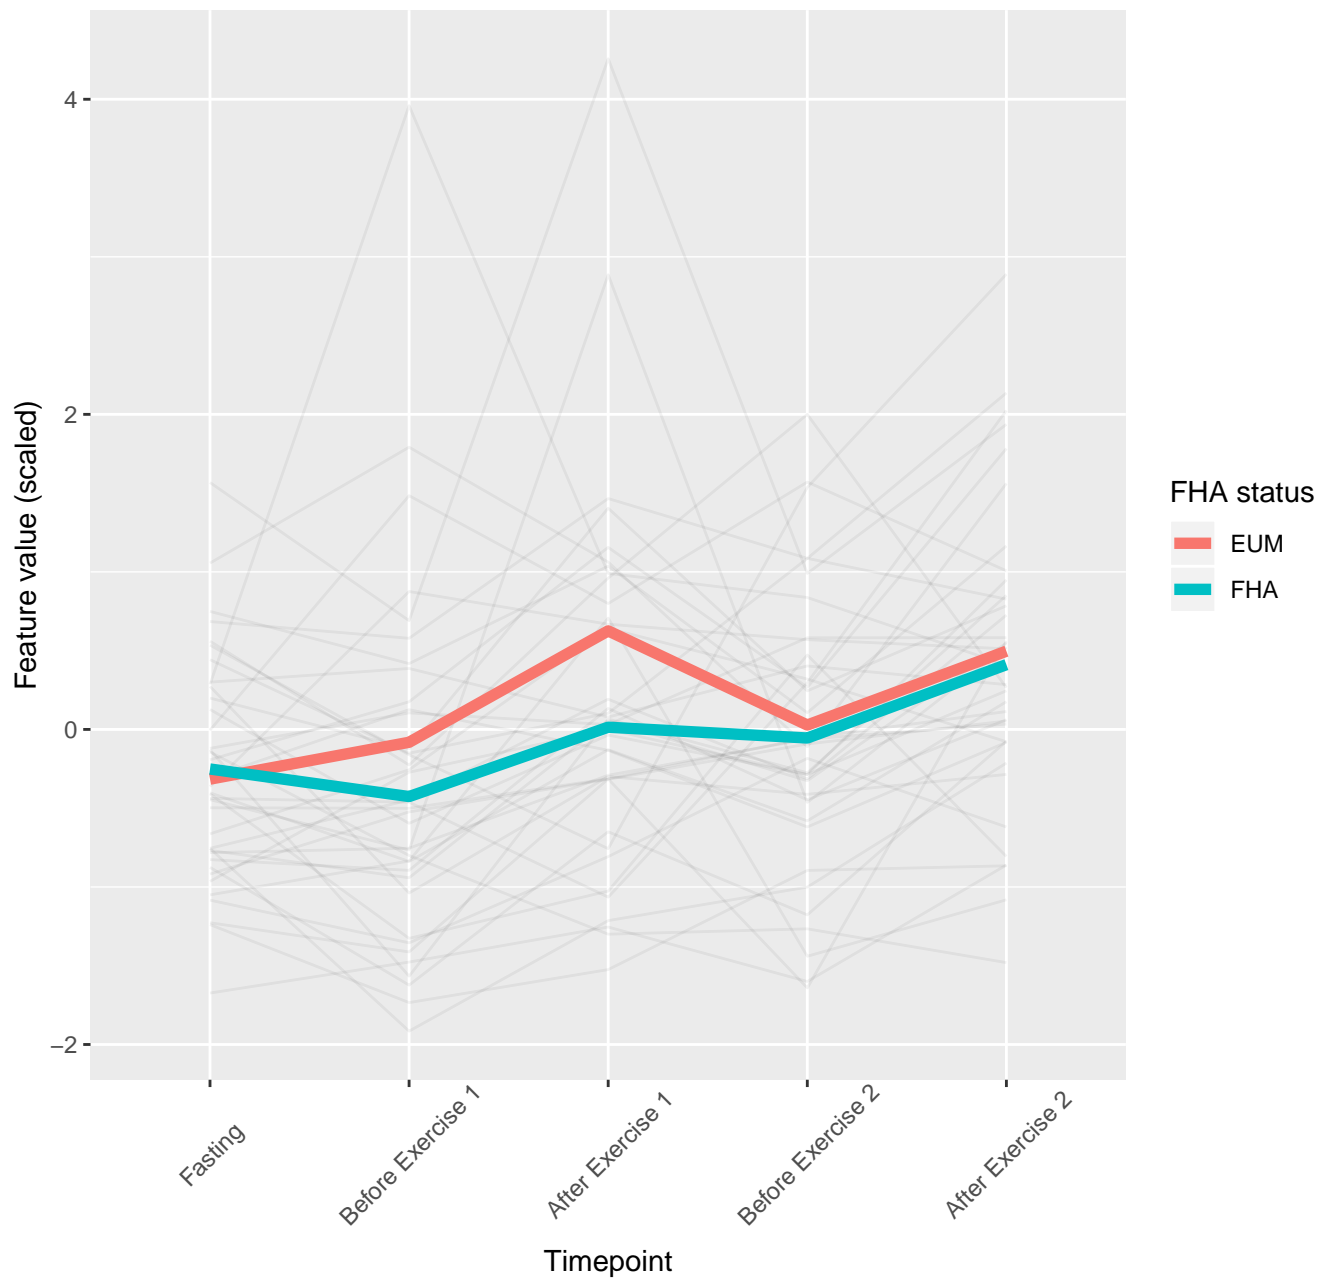

Line plot of TG(52:3)

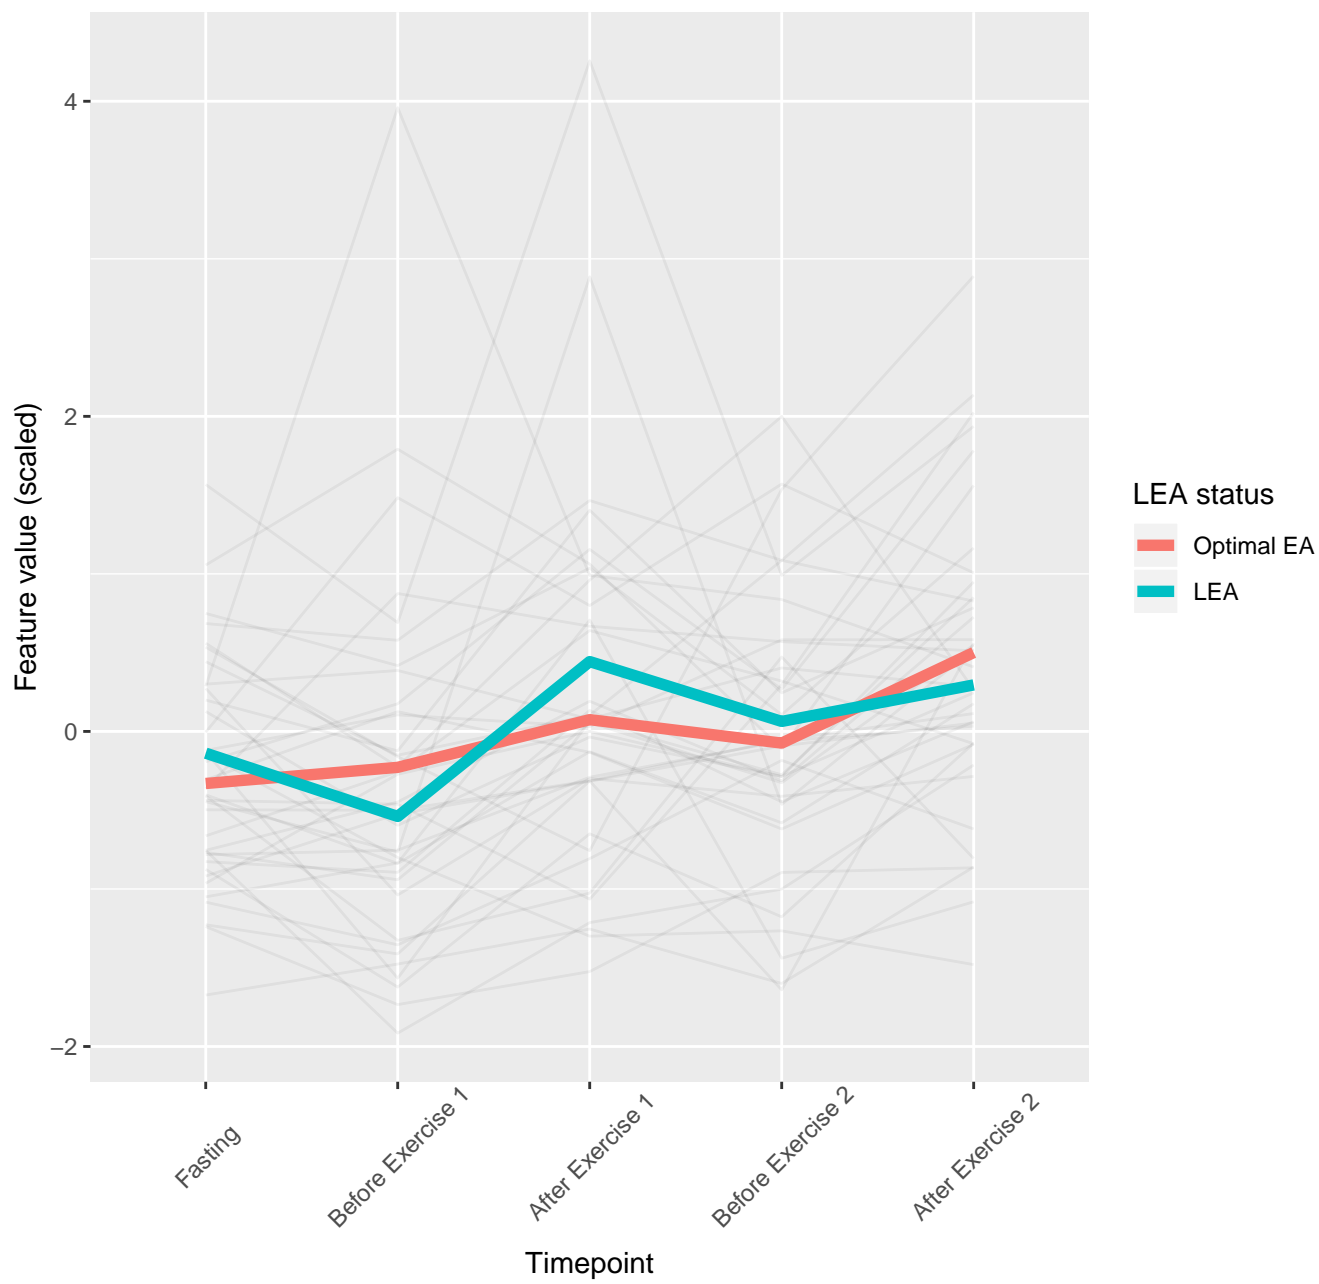



Line plot of TG(52:4)

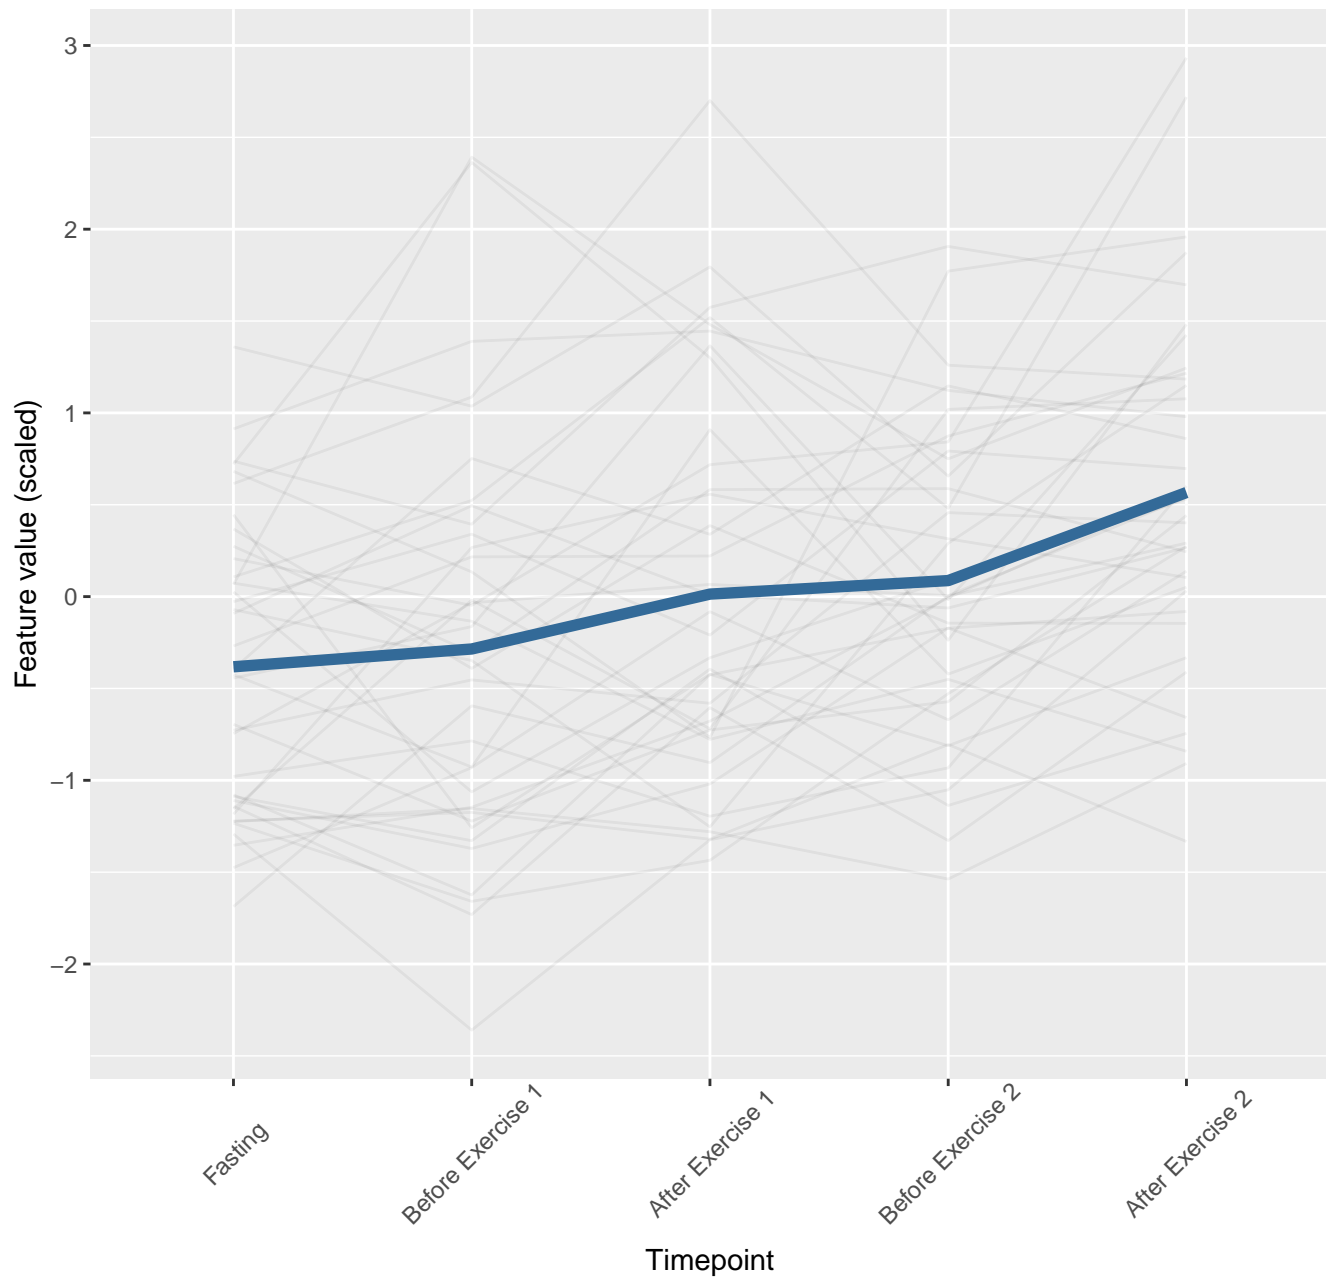

Line plot of TG(52:4)

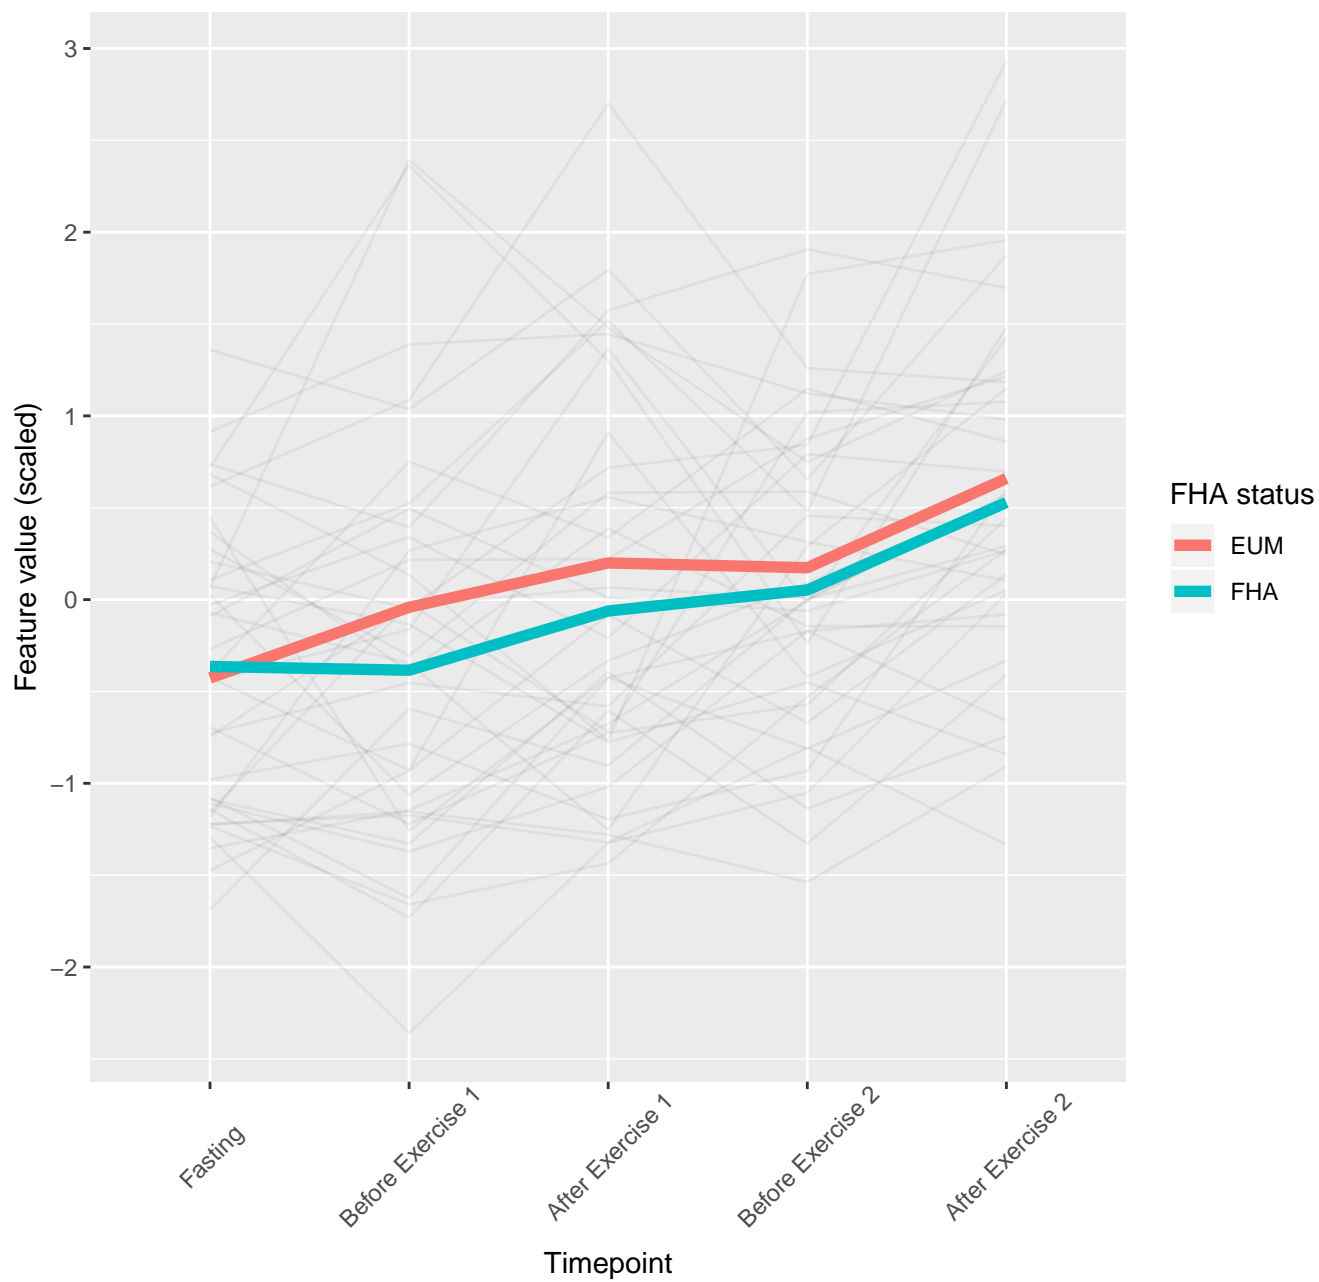

Line plot of TG(52:4)

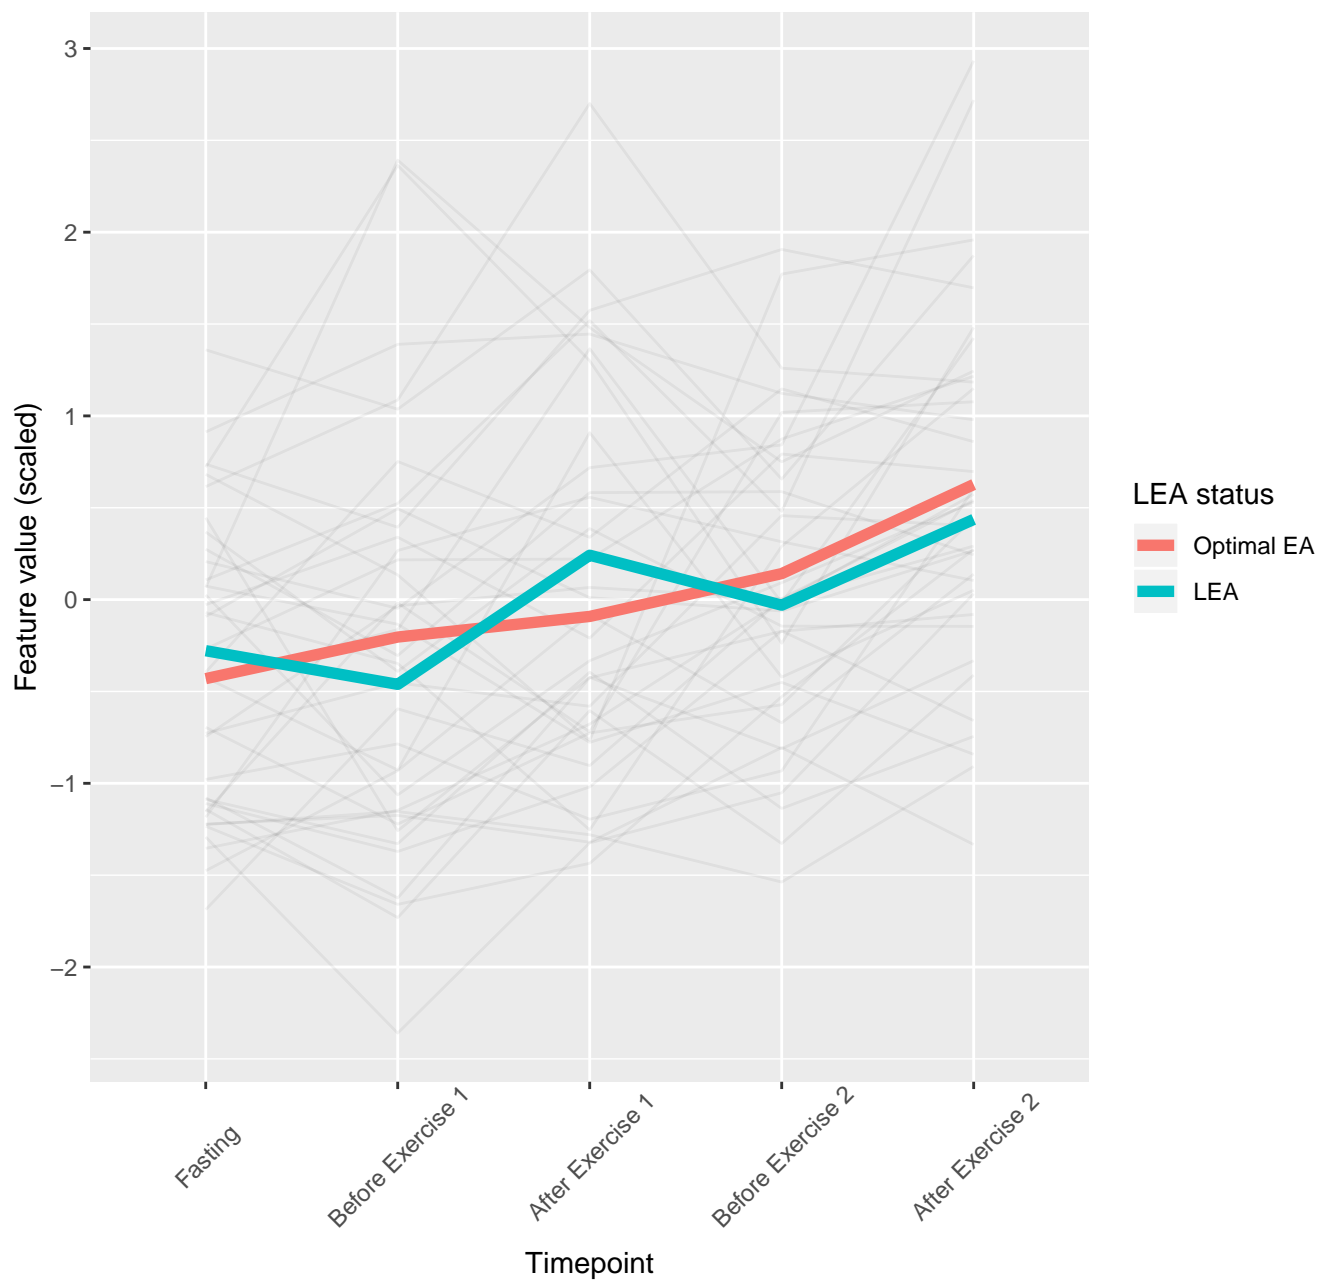

Line plot of TG(52:5)

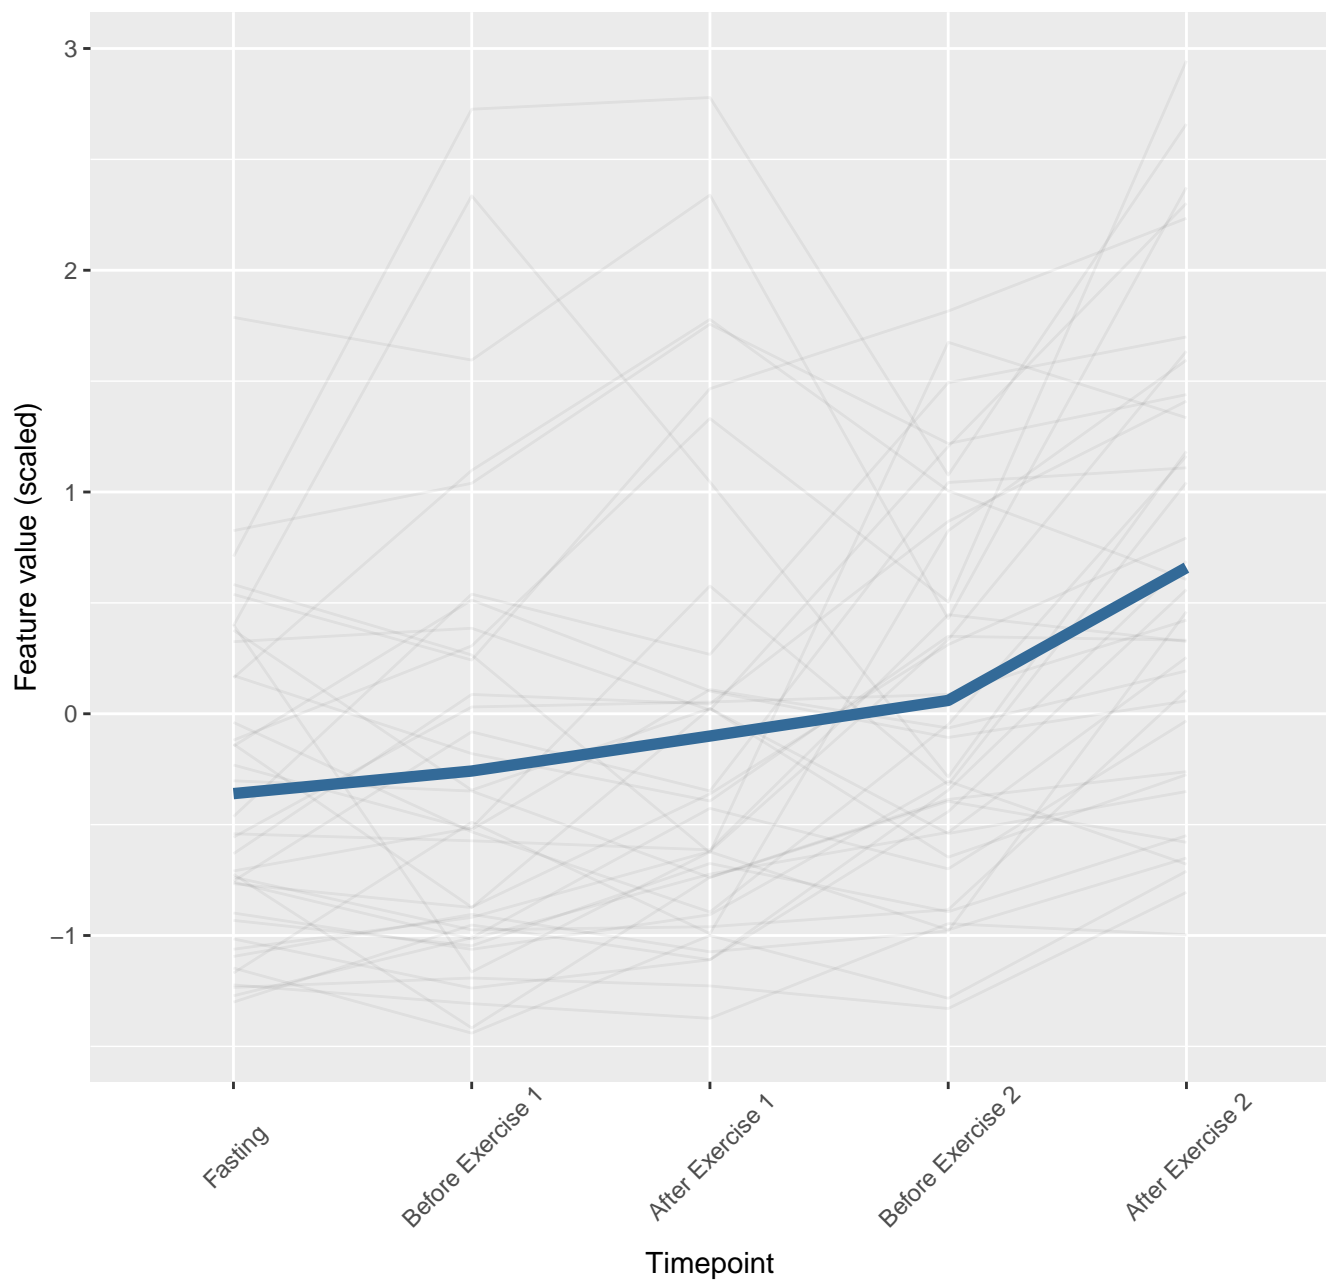

Line plot of TG(52:5)

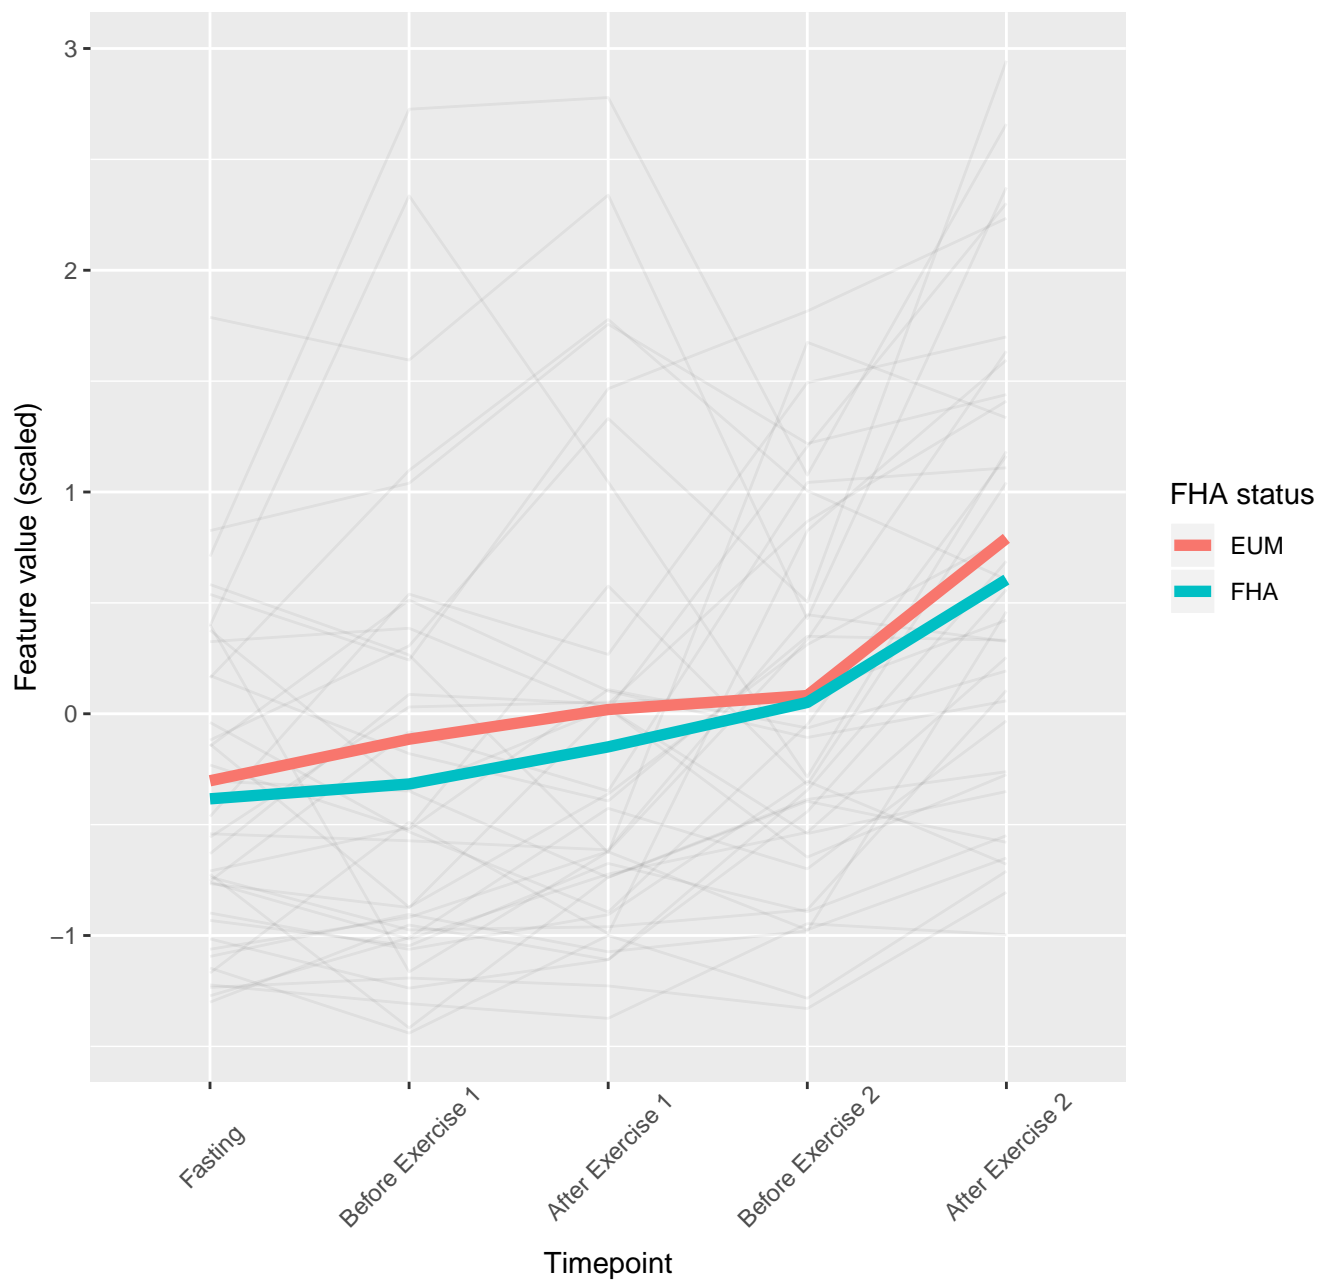

Line plot of TG(52:5)

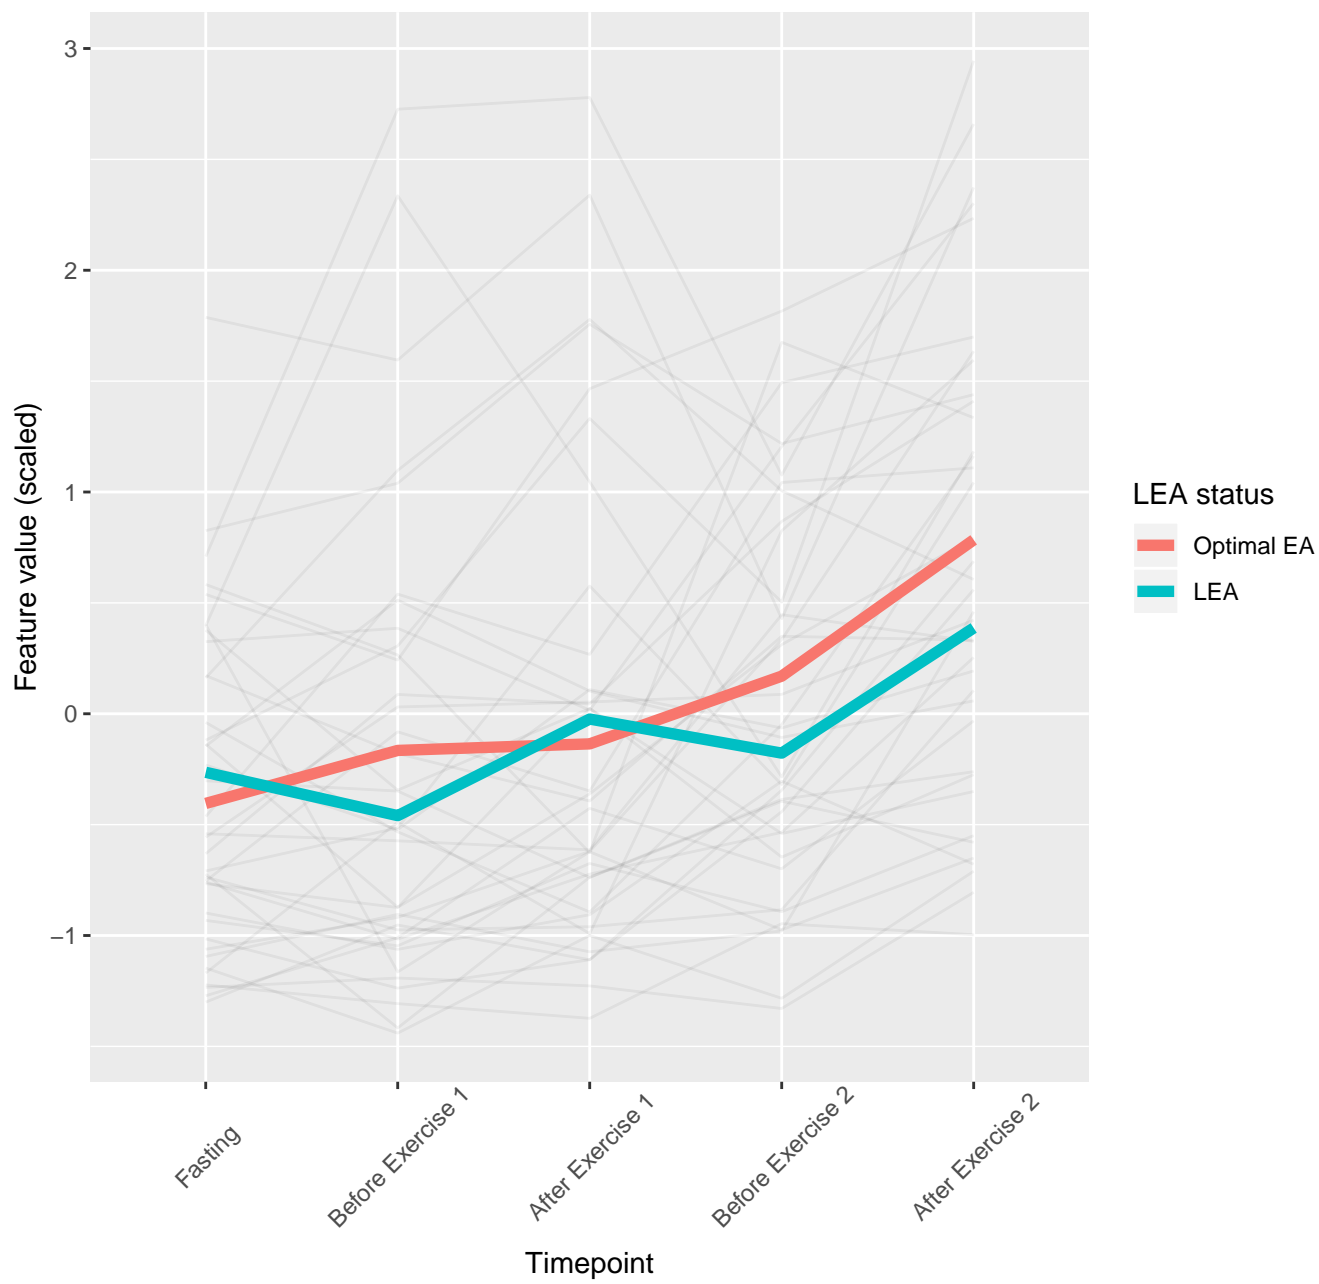

Line plot of TG(52:6)

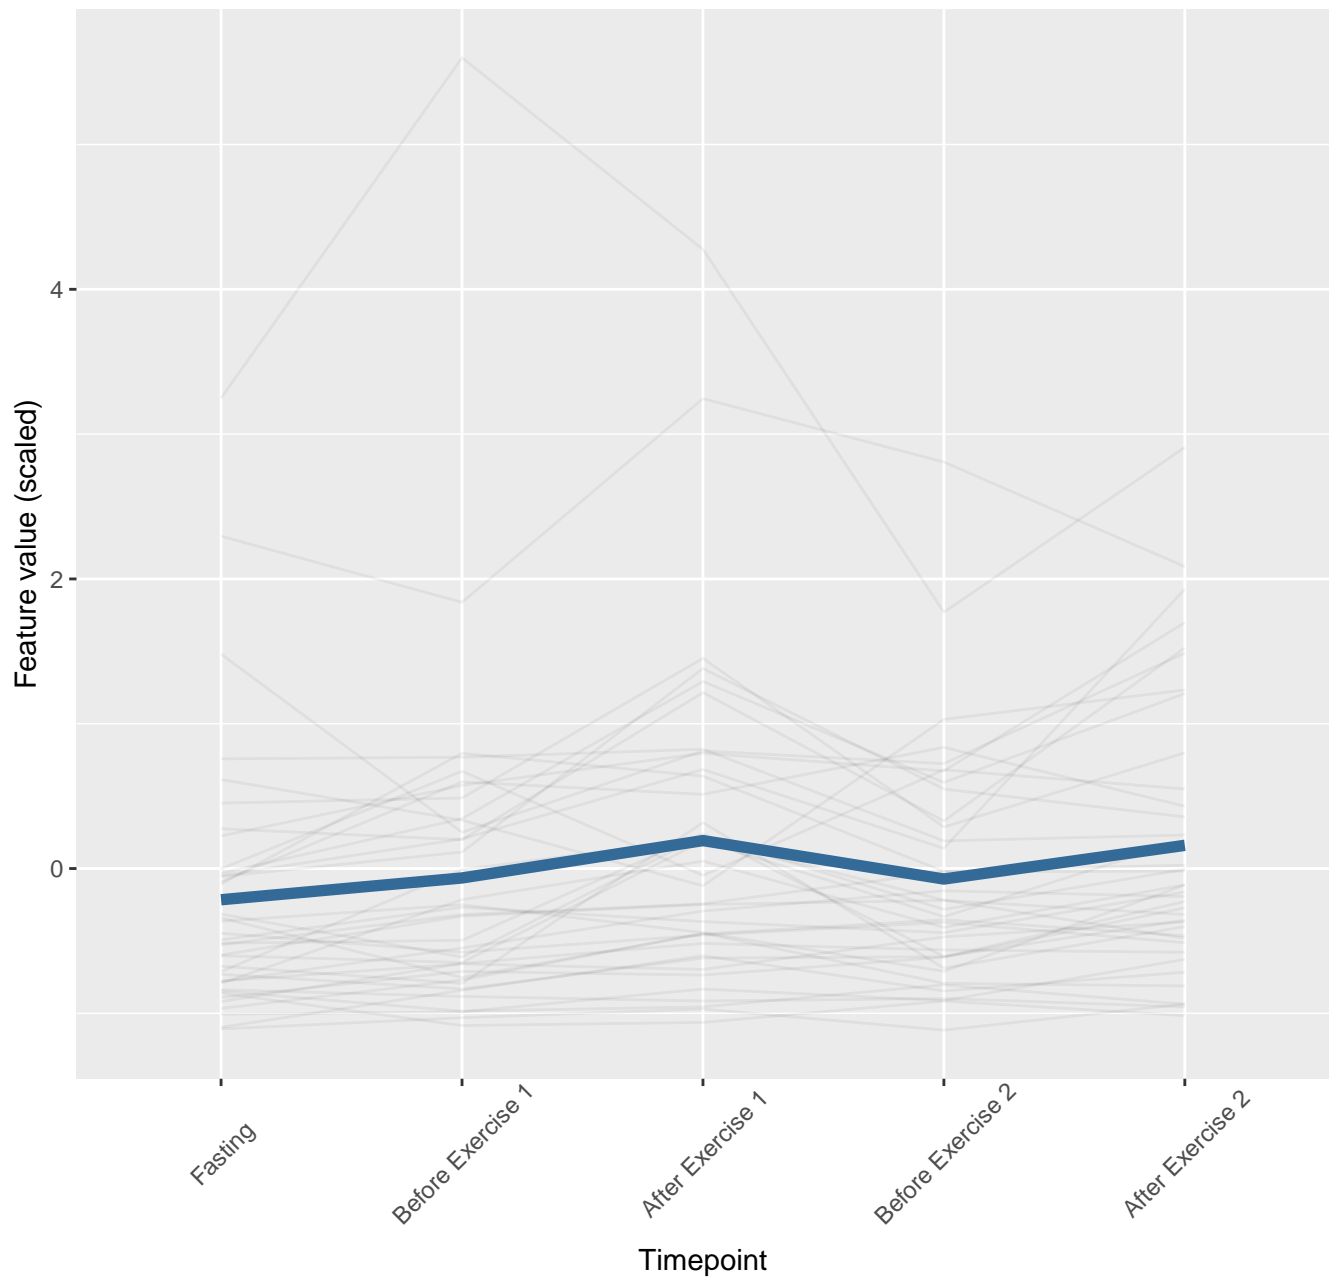

Line plot of TG(52:6)

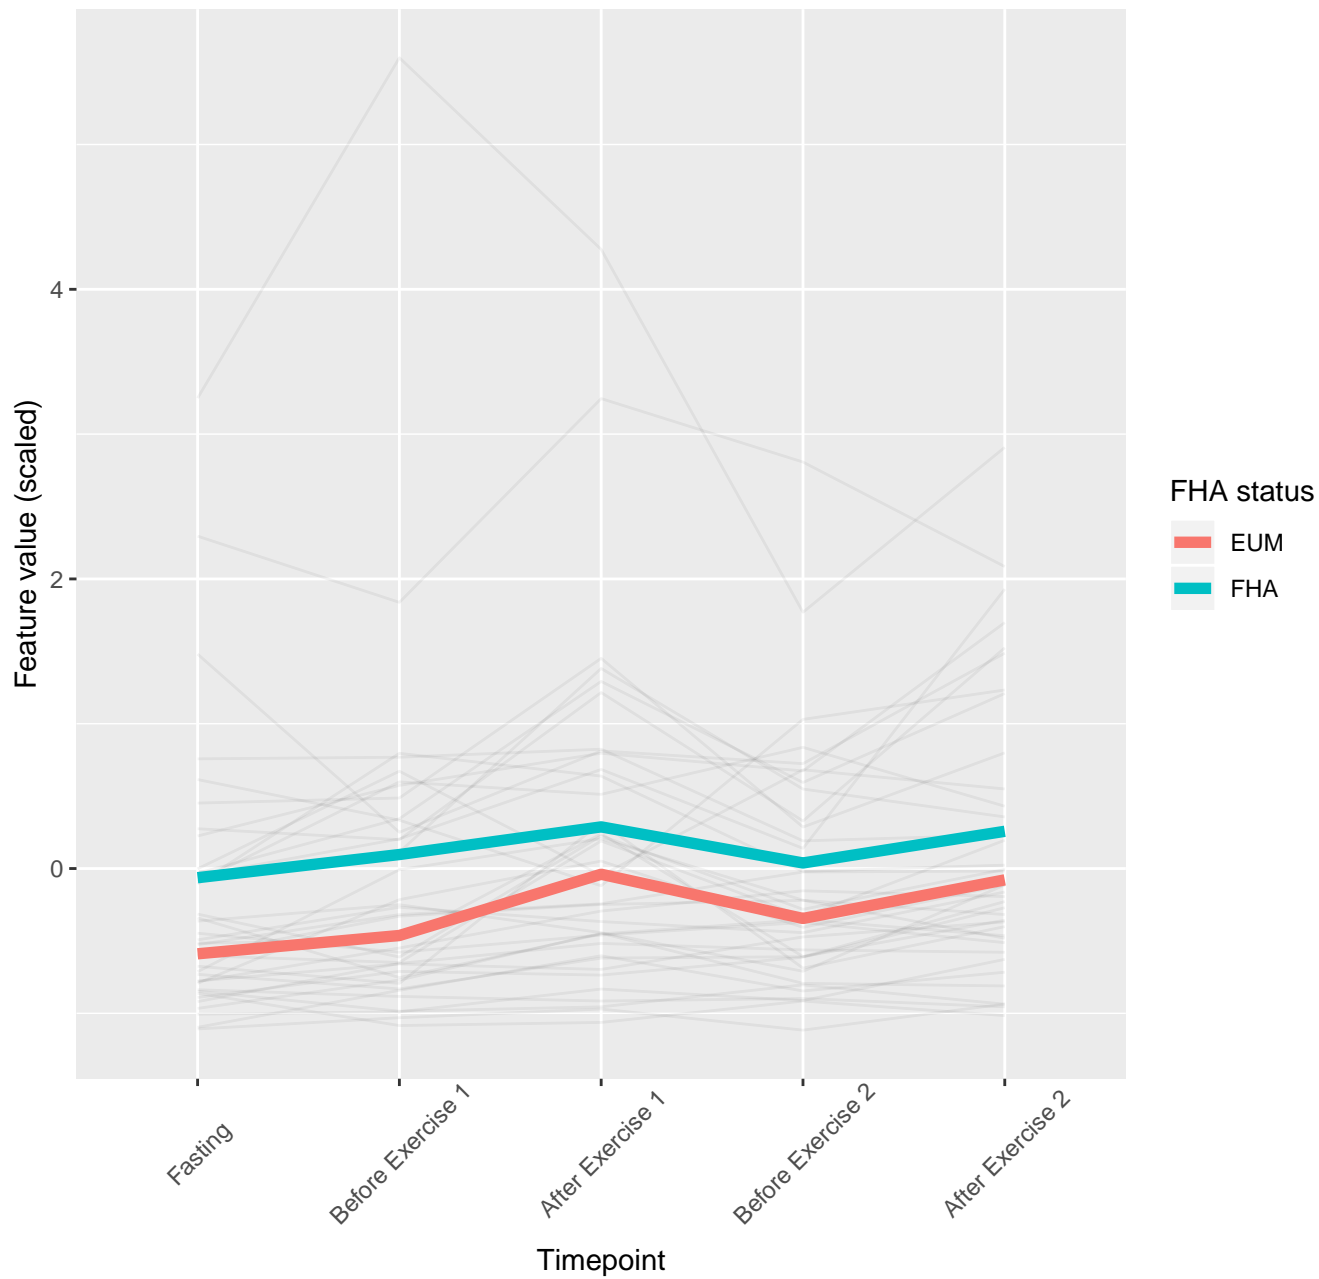



Line plot of TG(52:6)

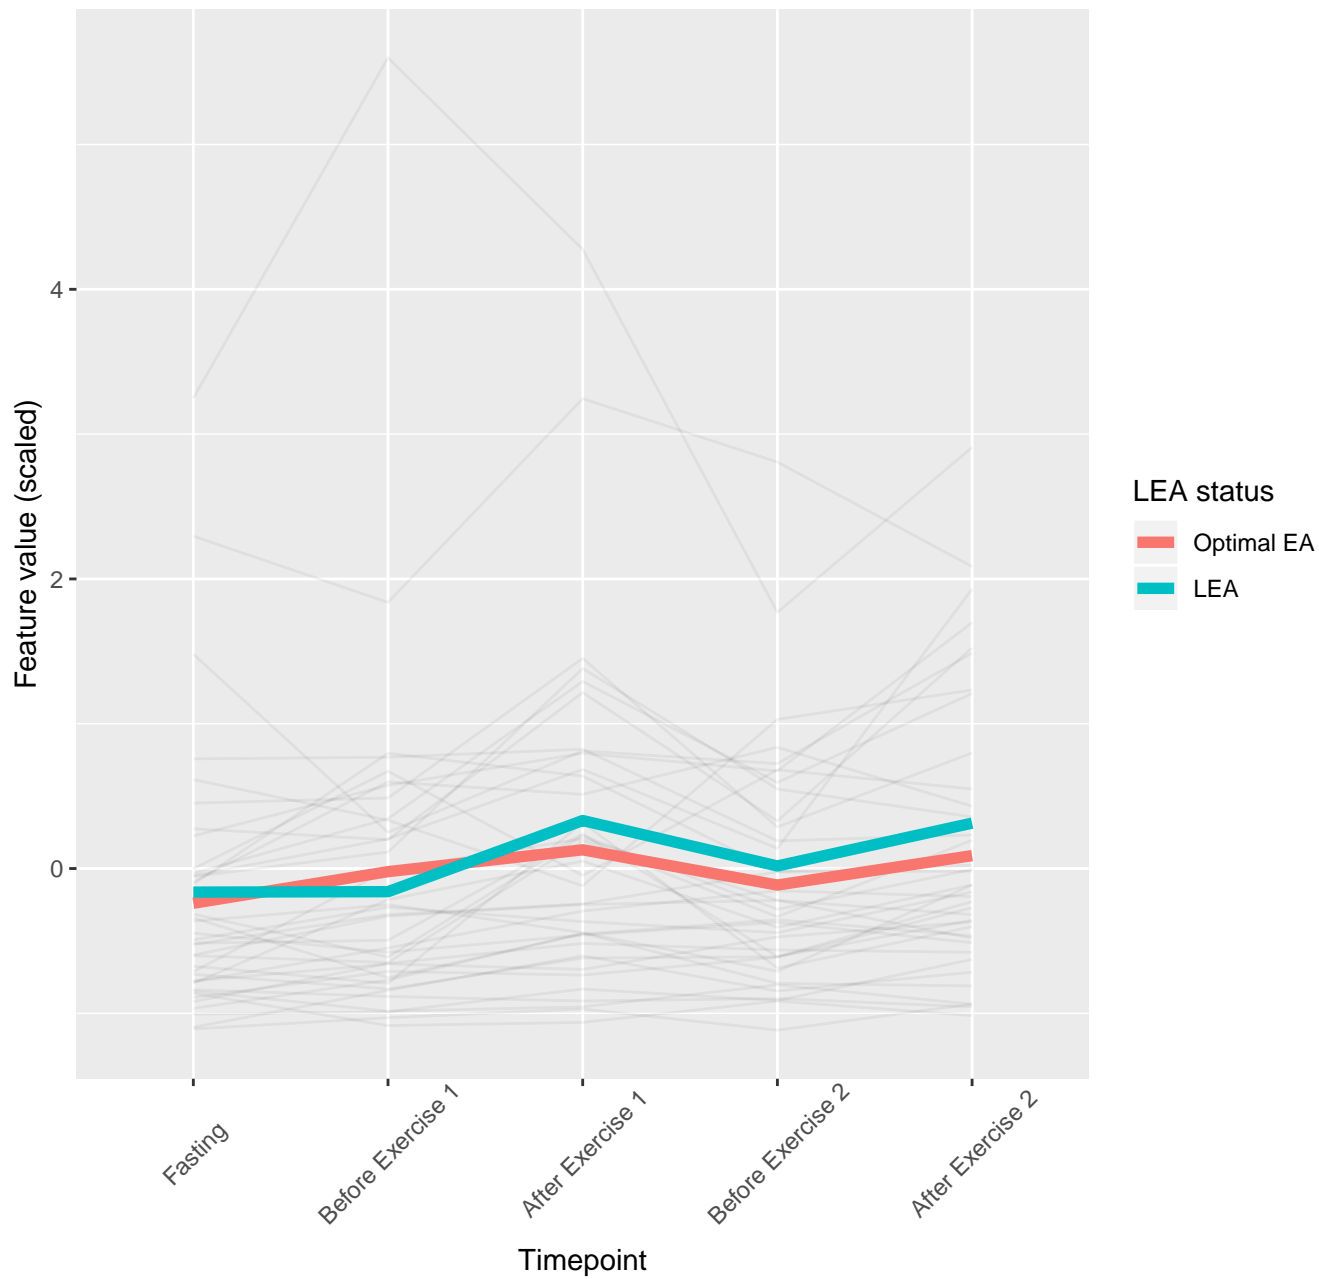

Line plot of TG(52:7)

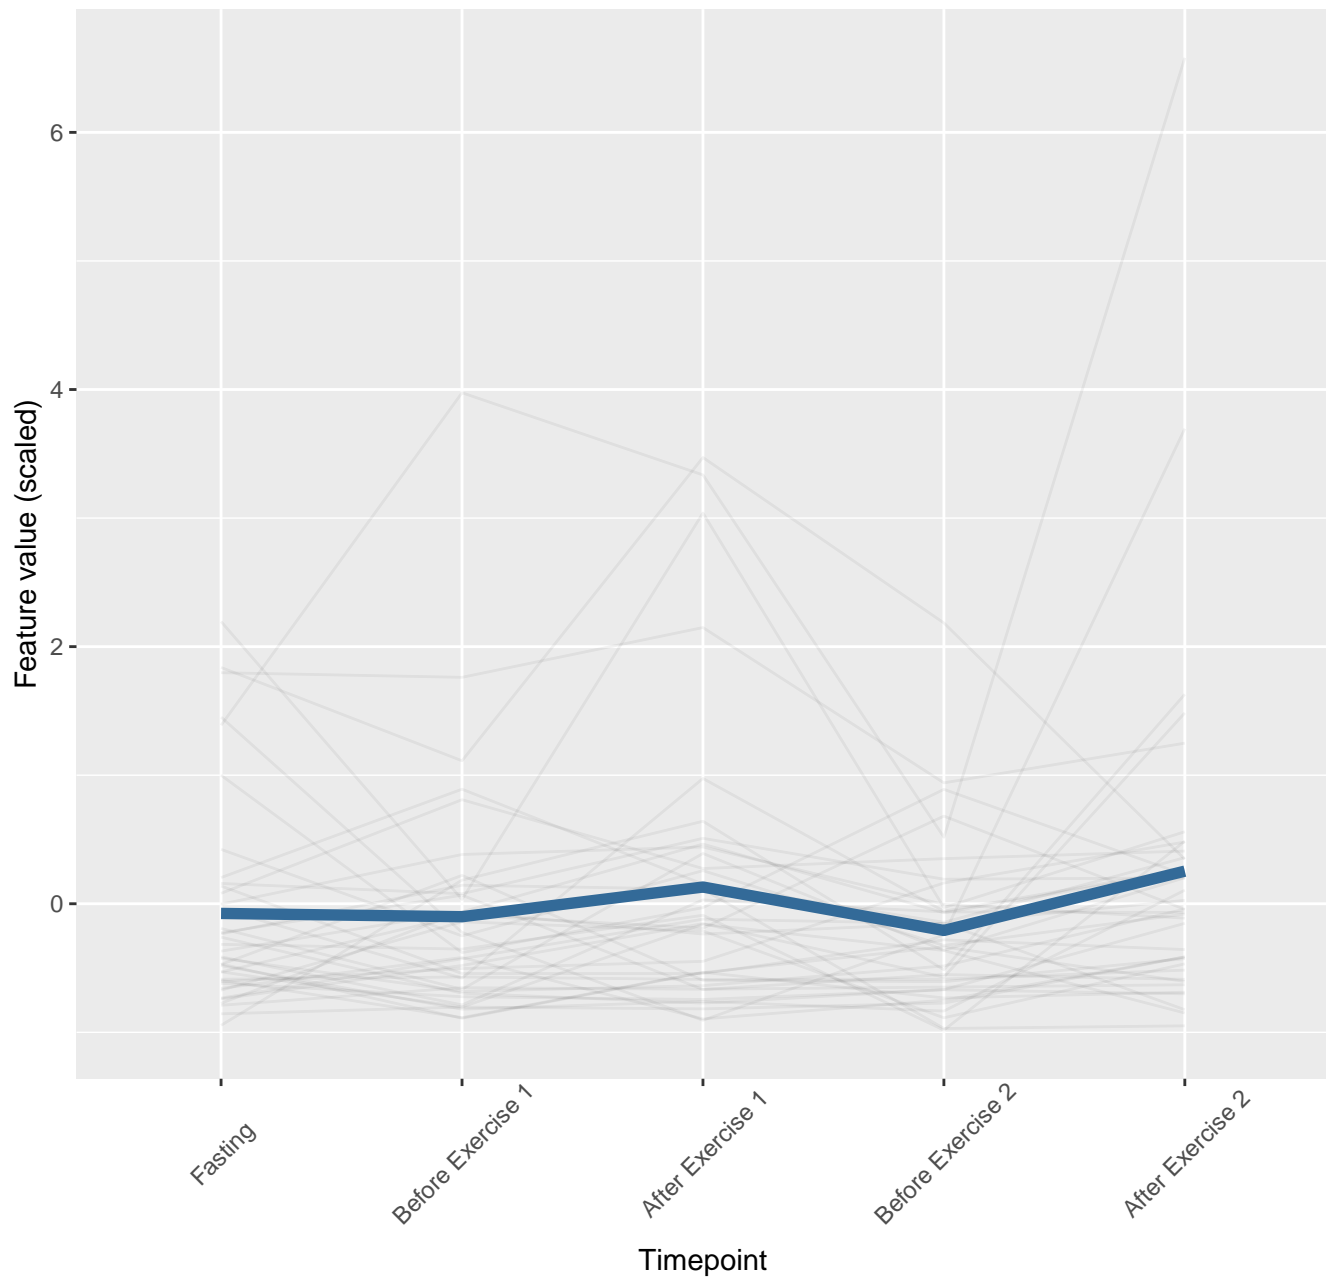

Line plot of TG(52:7)

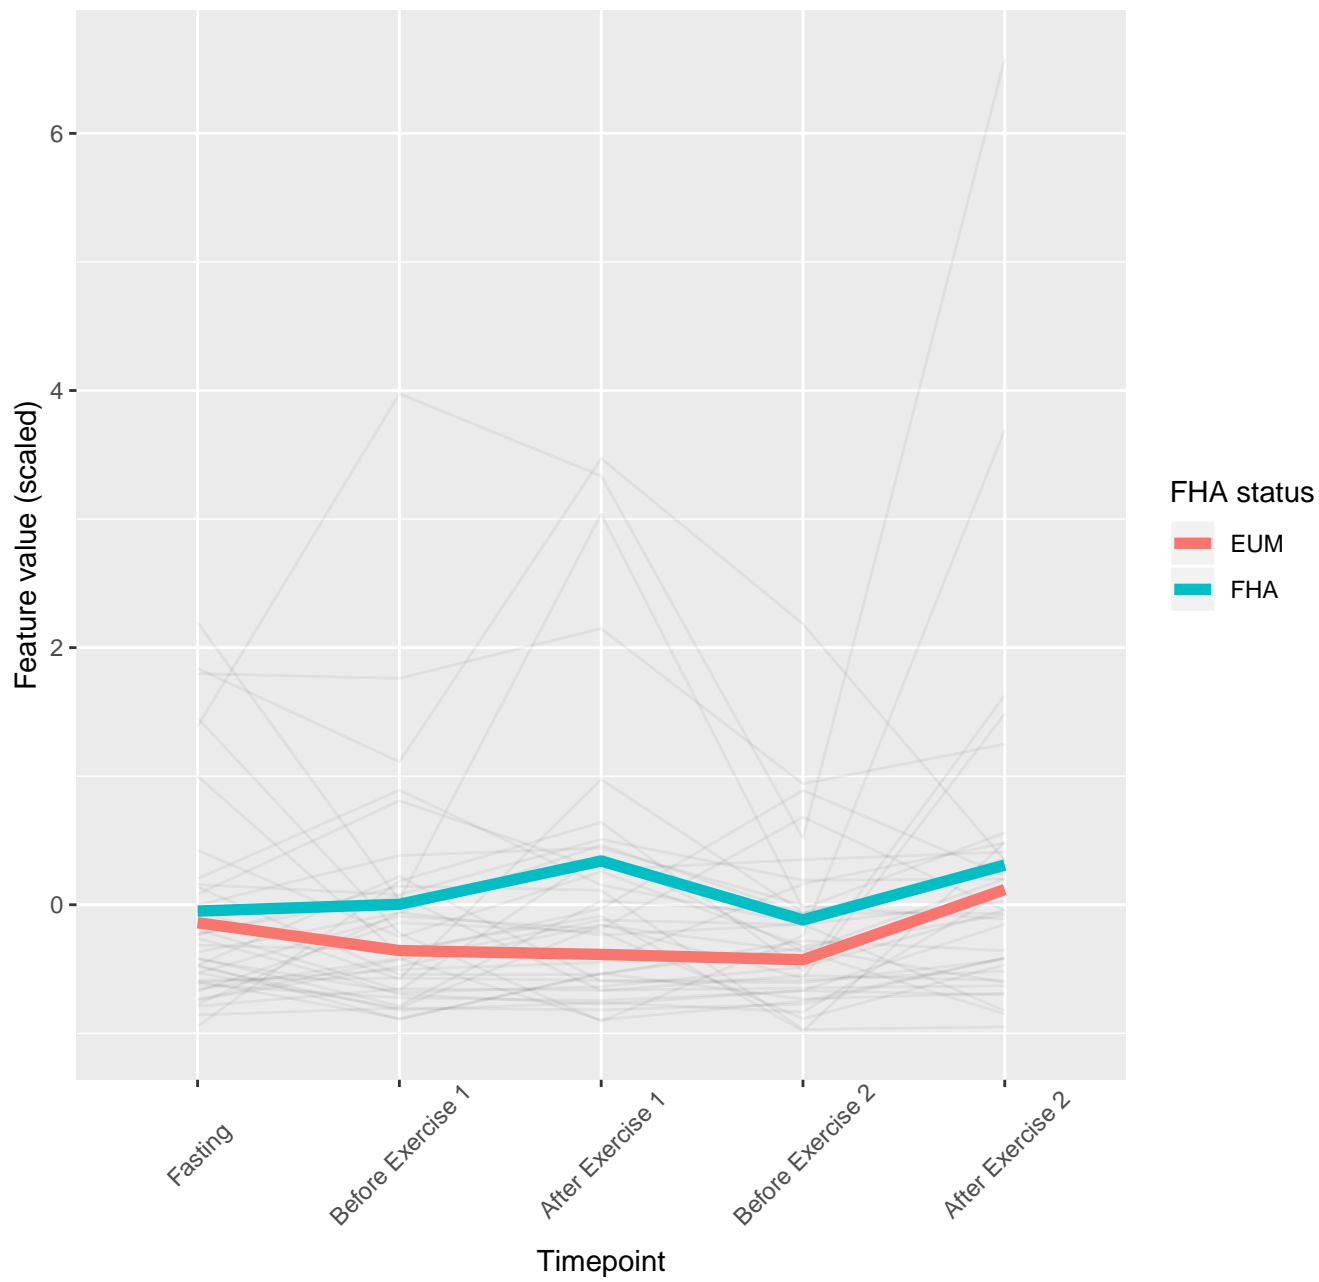

Line plot of TG(52:7)

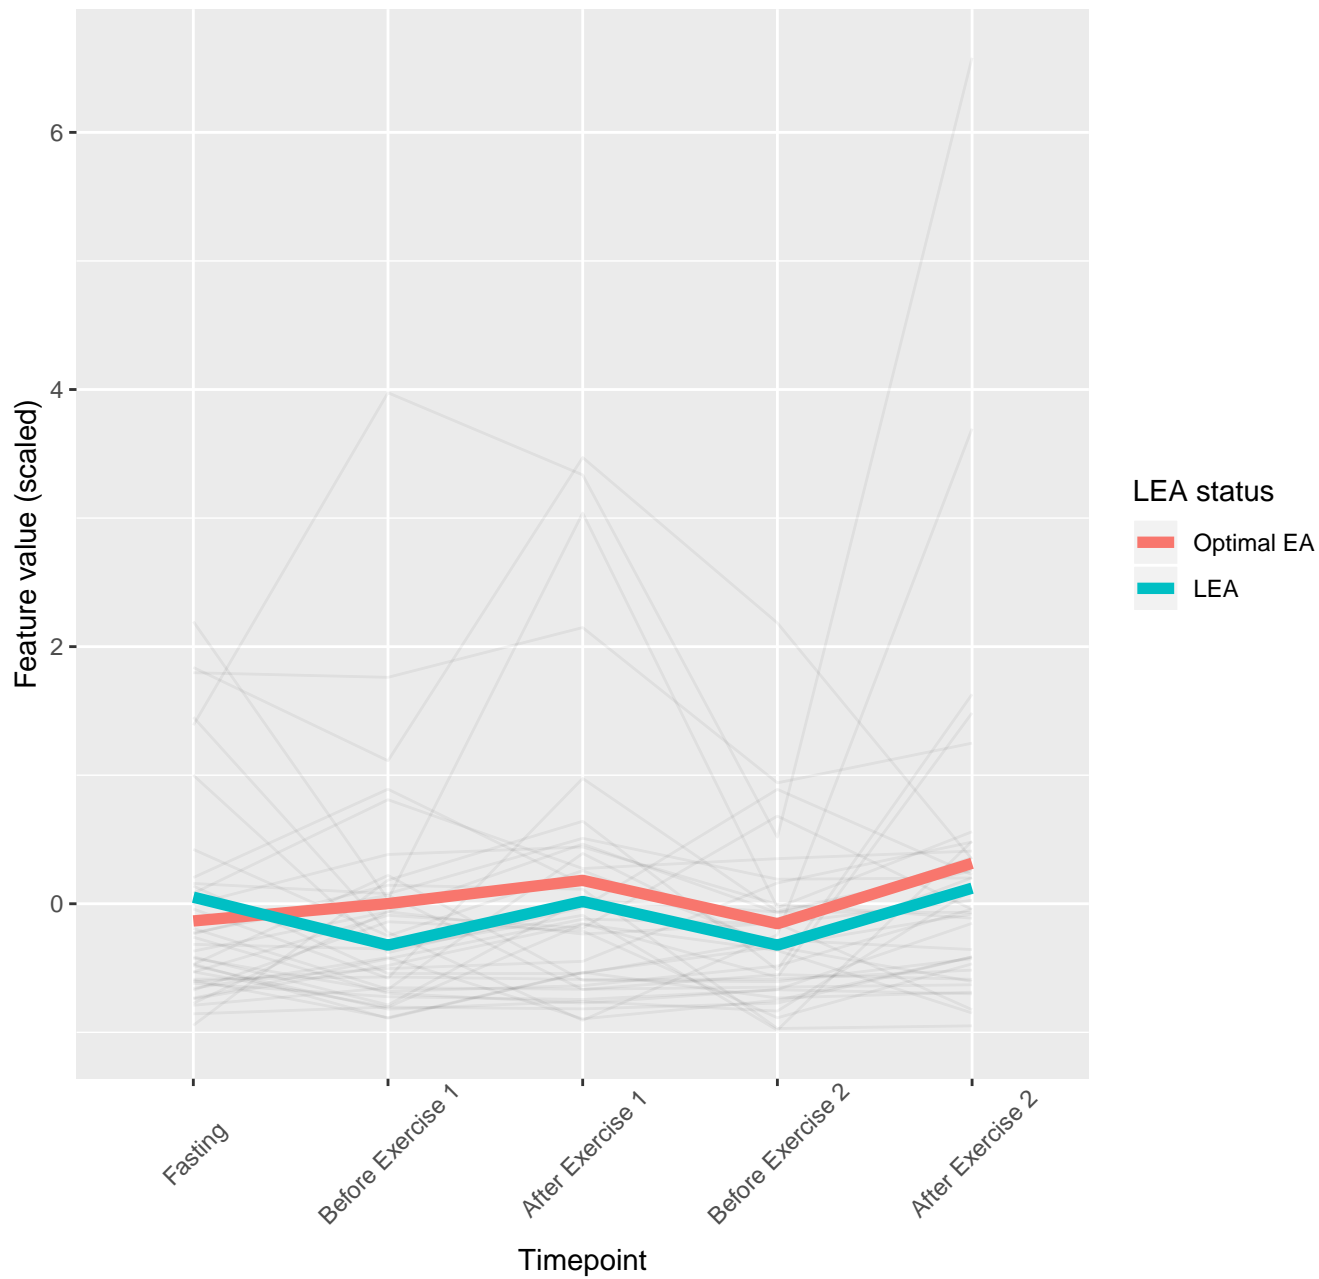

Line plot of TG(53:1)

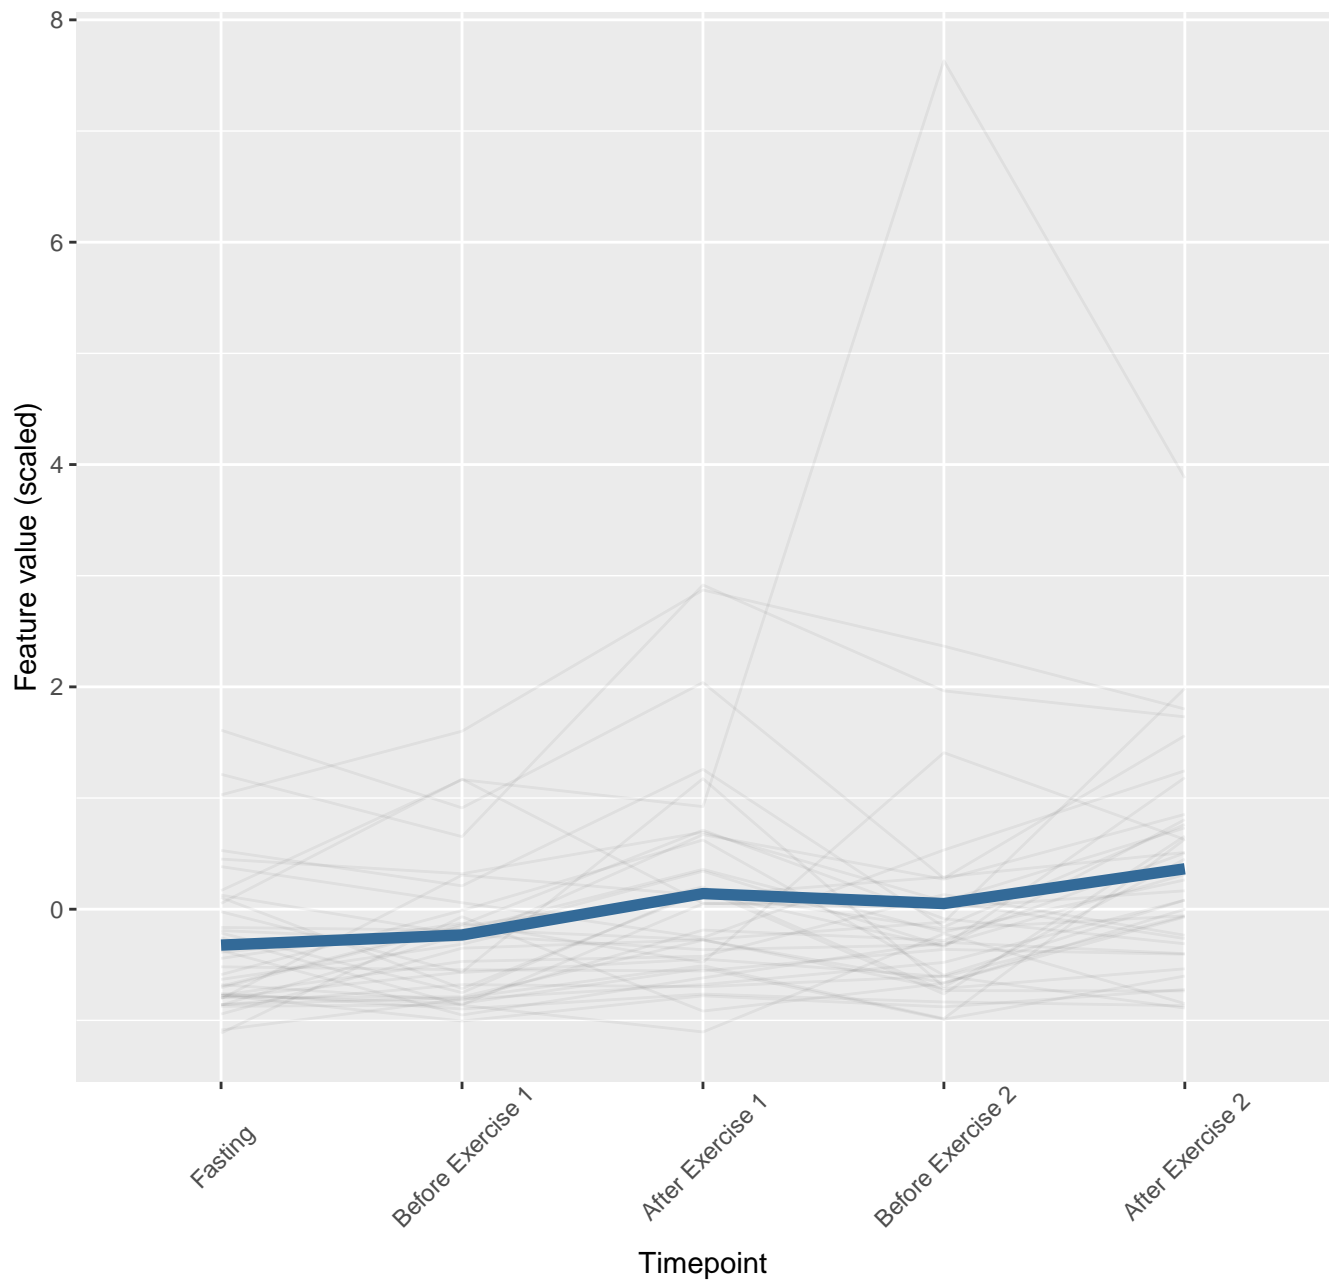

Line plot of TG(53:1)

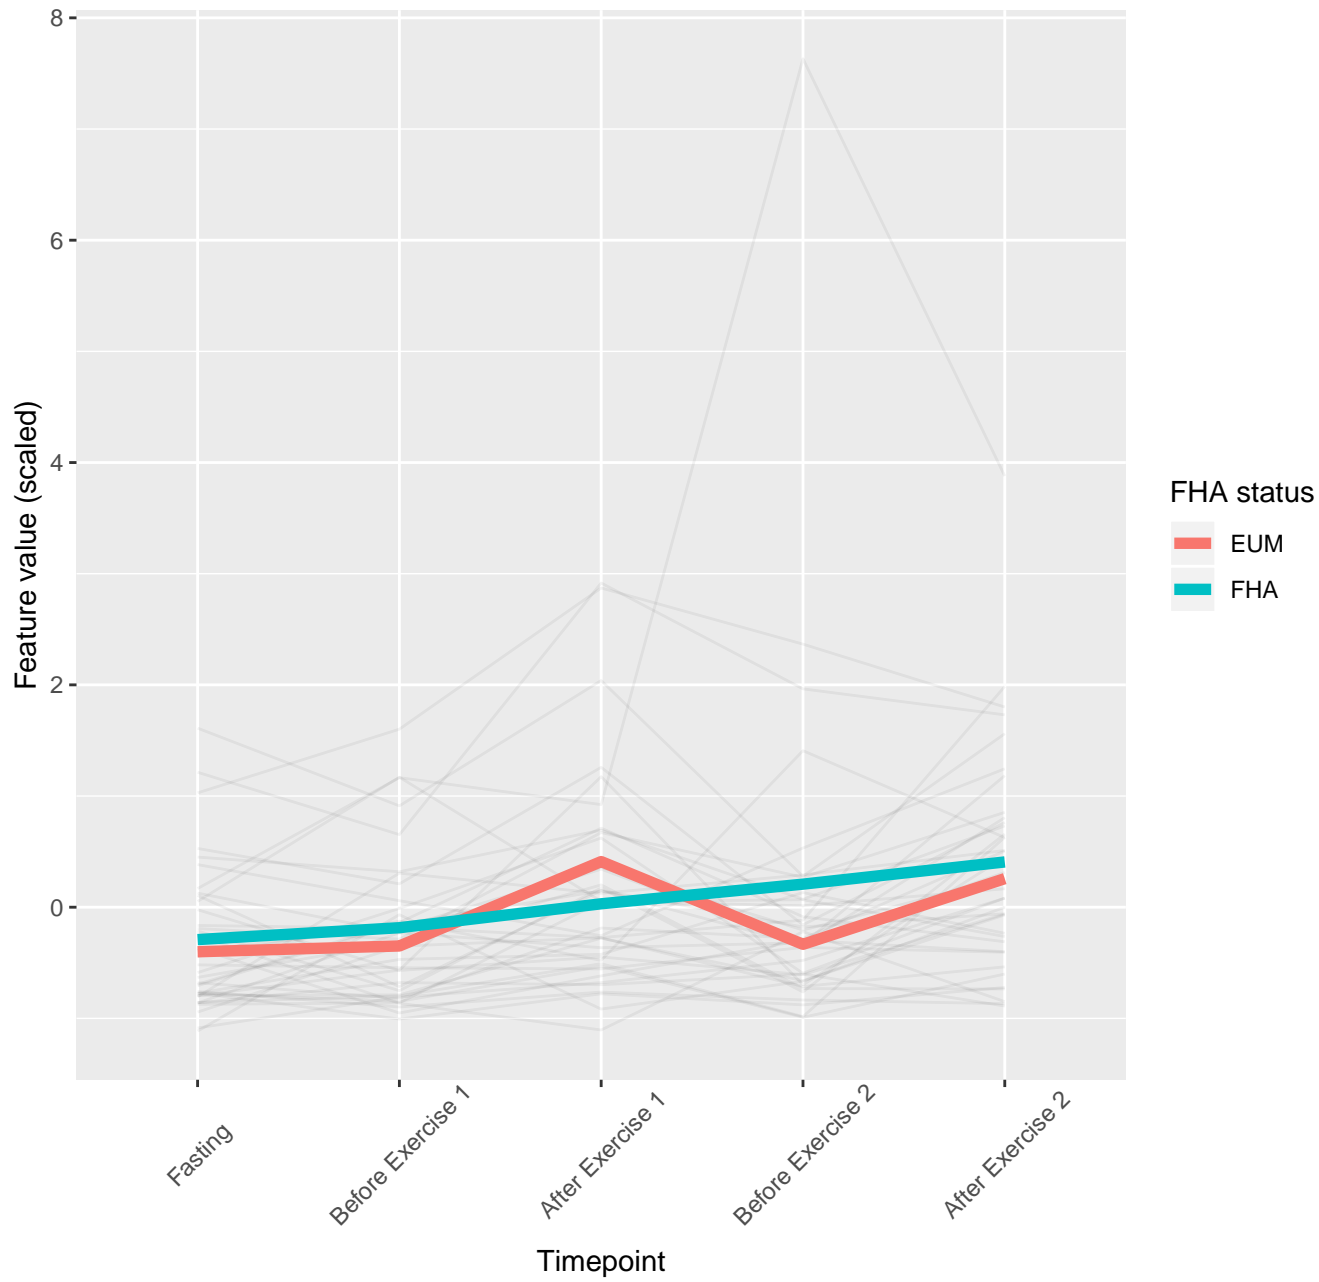

Line plot of TG(53:1)

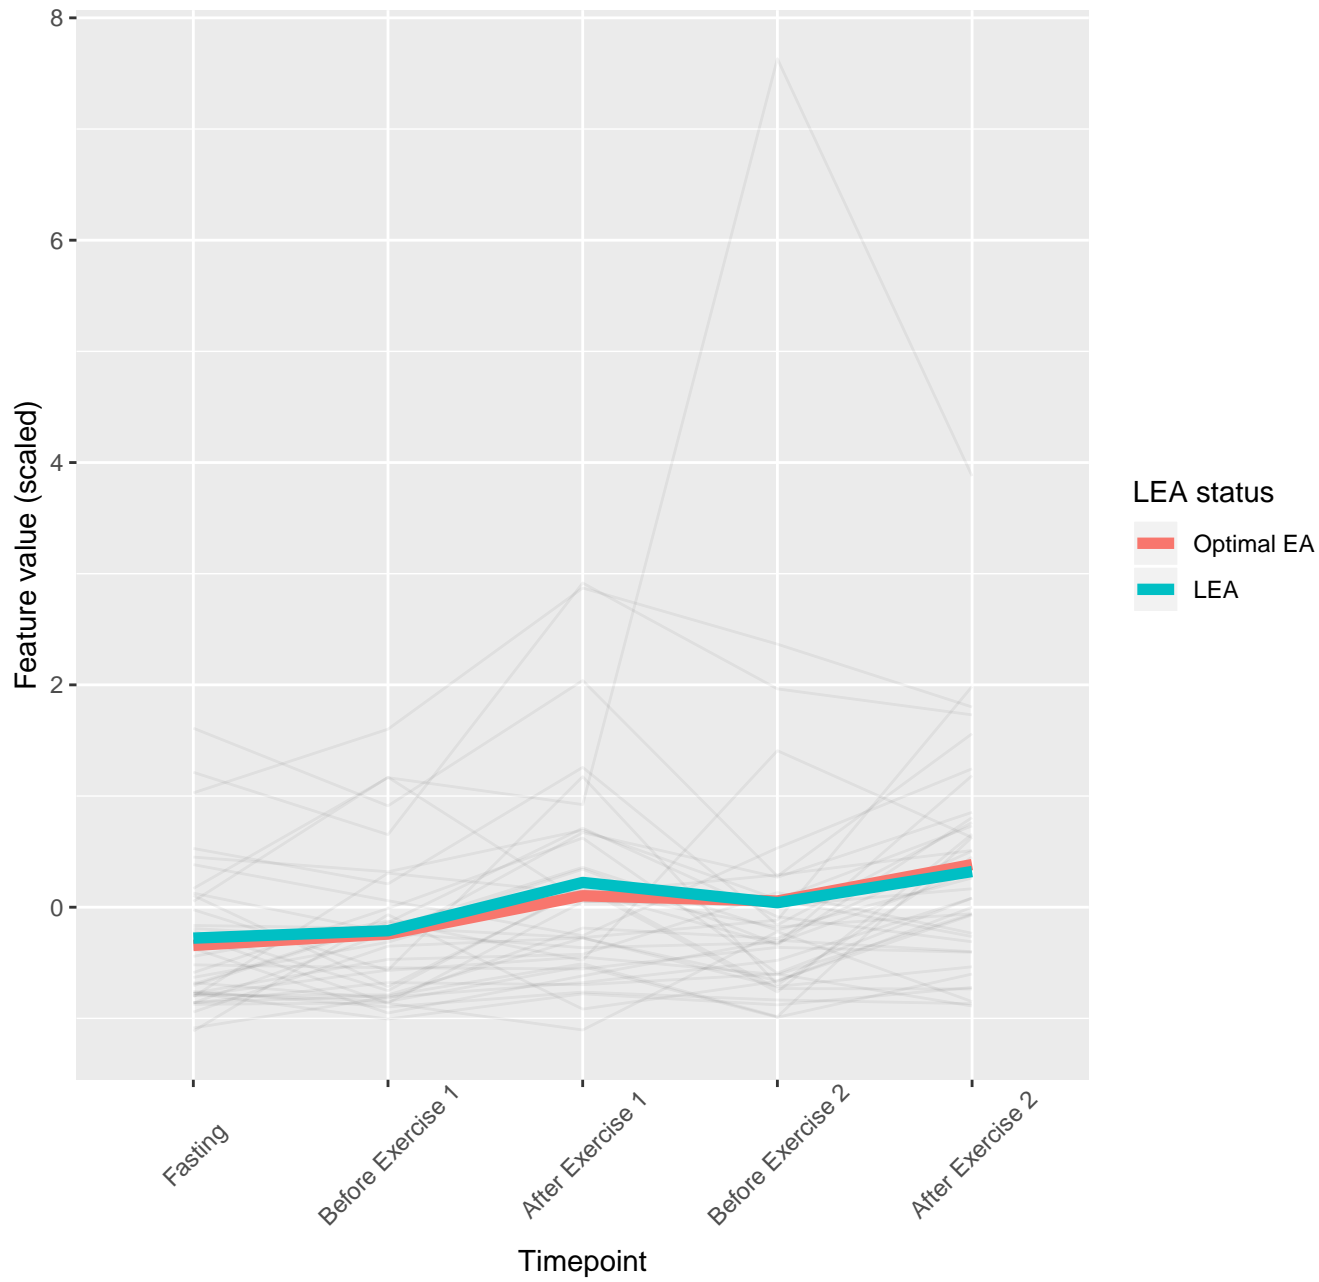

Line plot of TG(53:2)

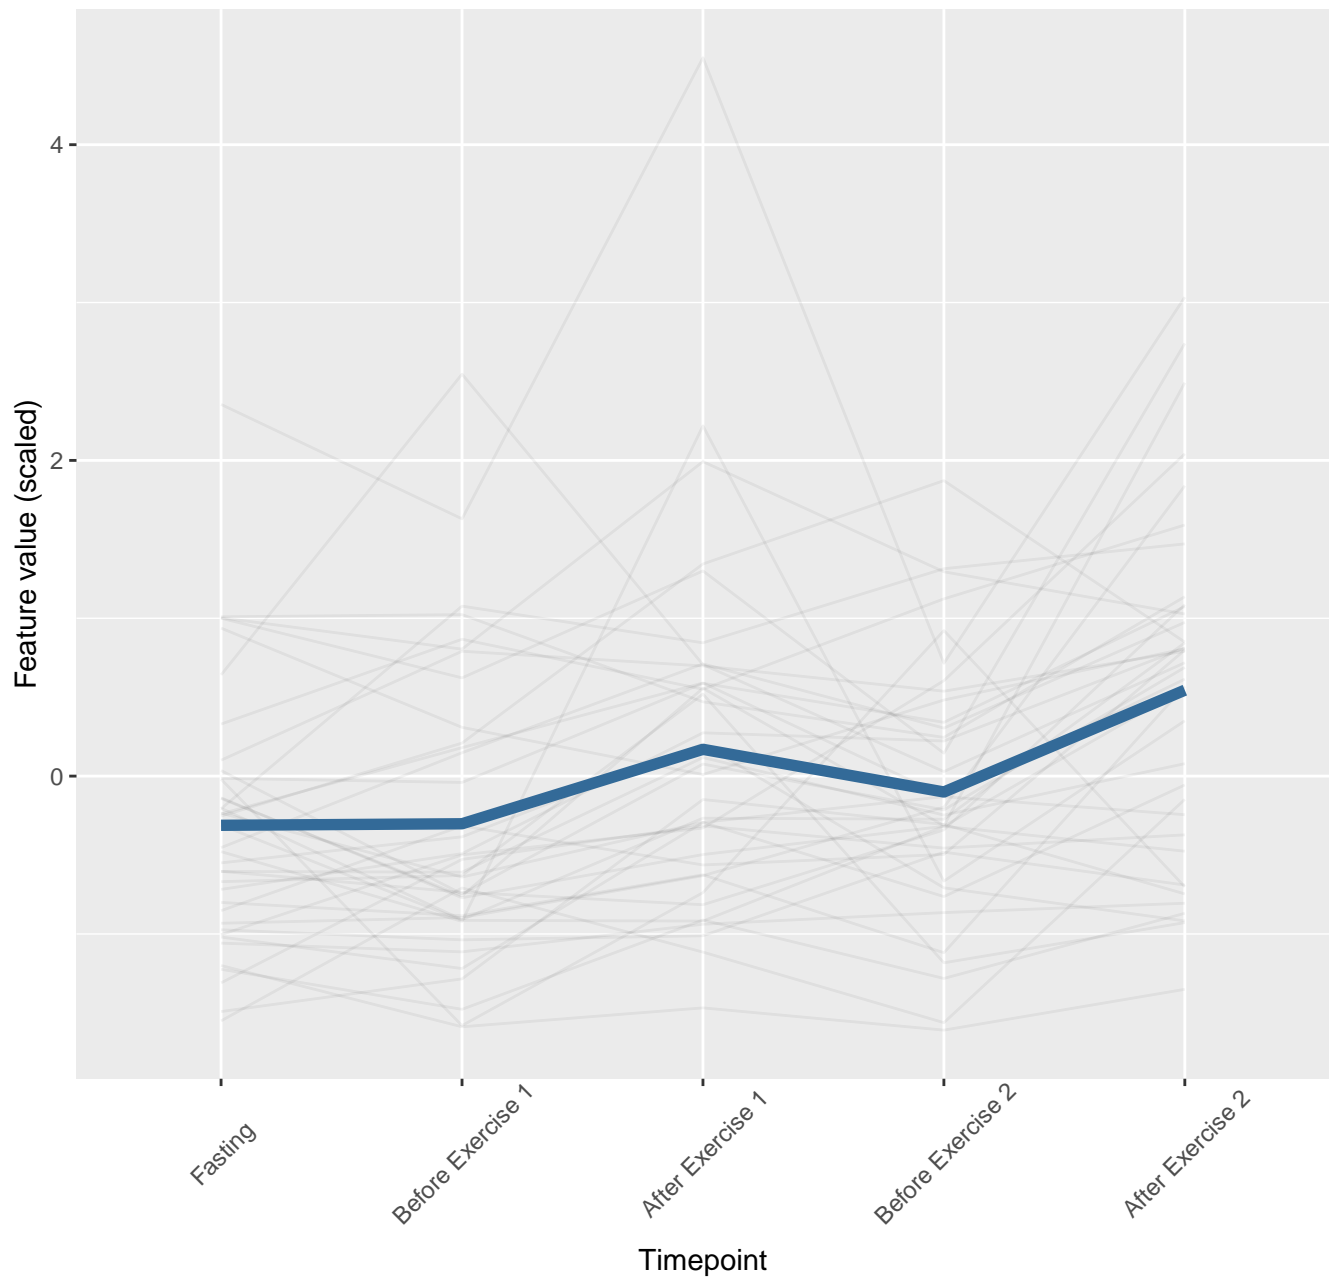



Line plot of TG(53:2)

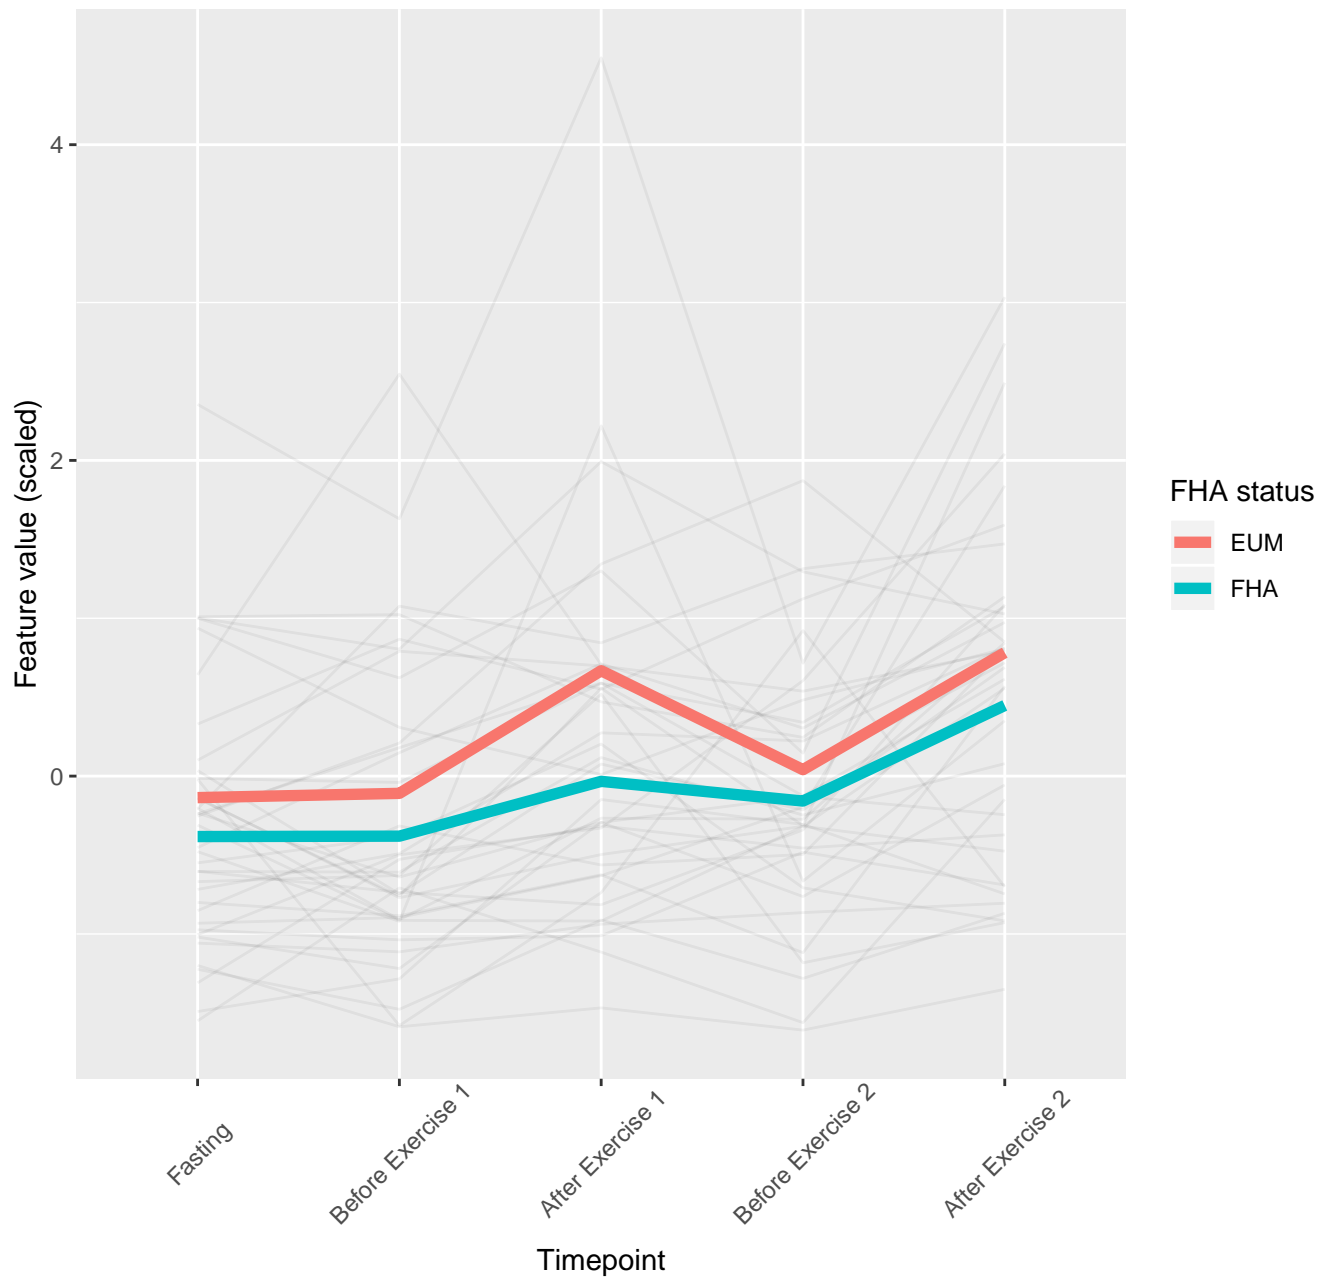

Line plot of TG(53:2)

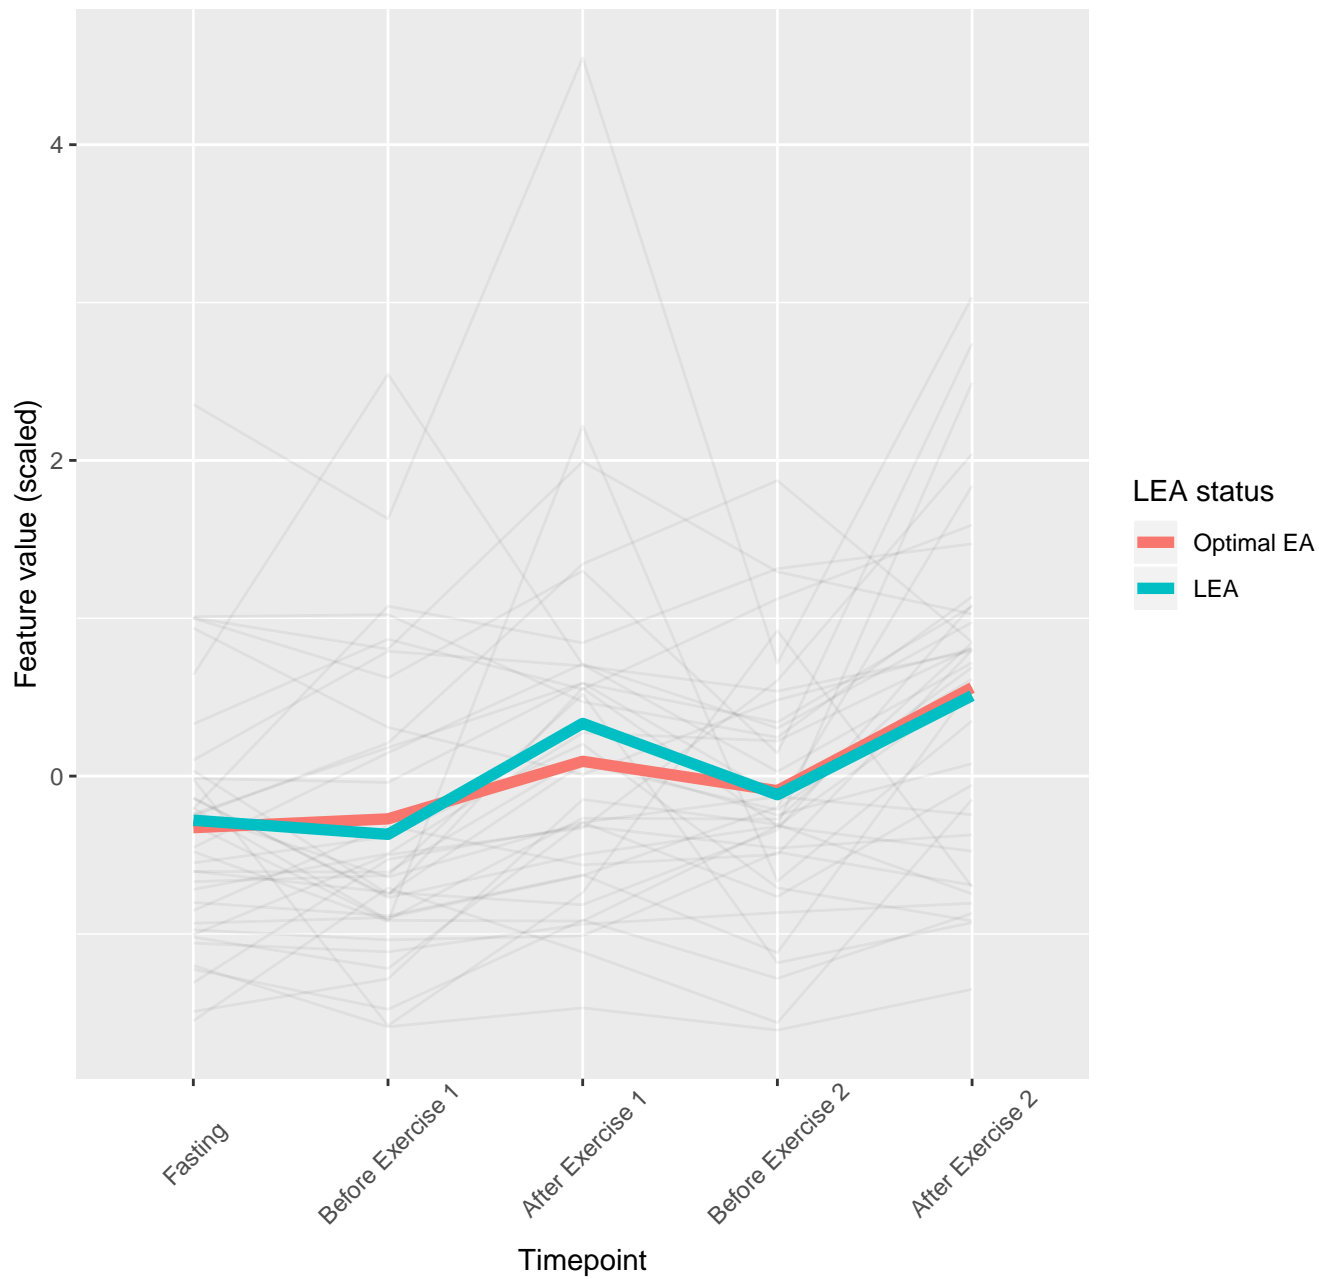

Line plot of TG(53:2).1

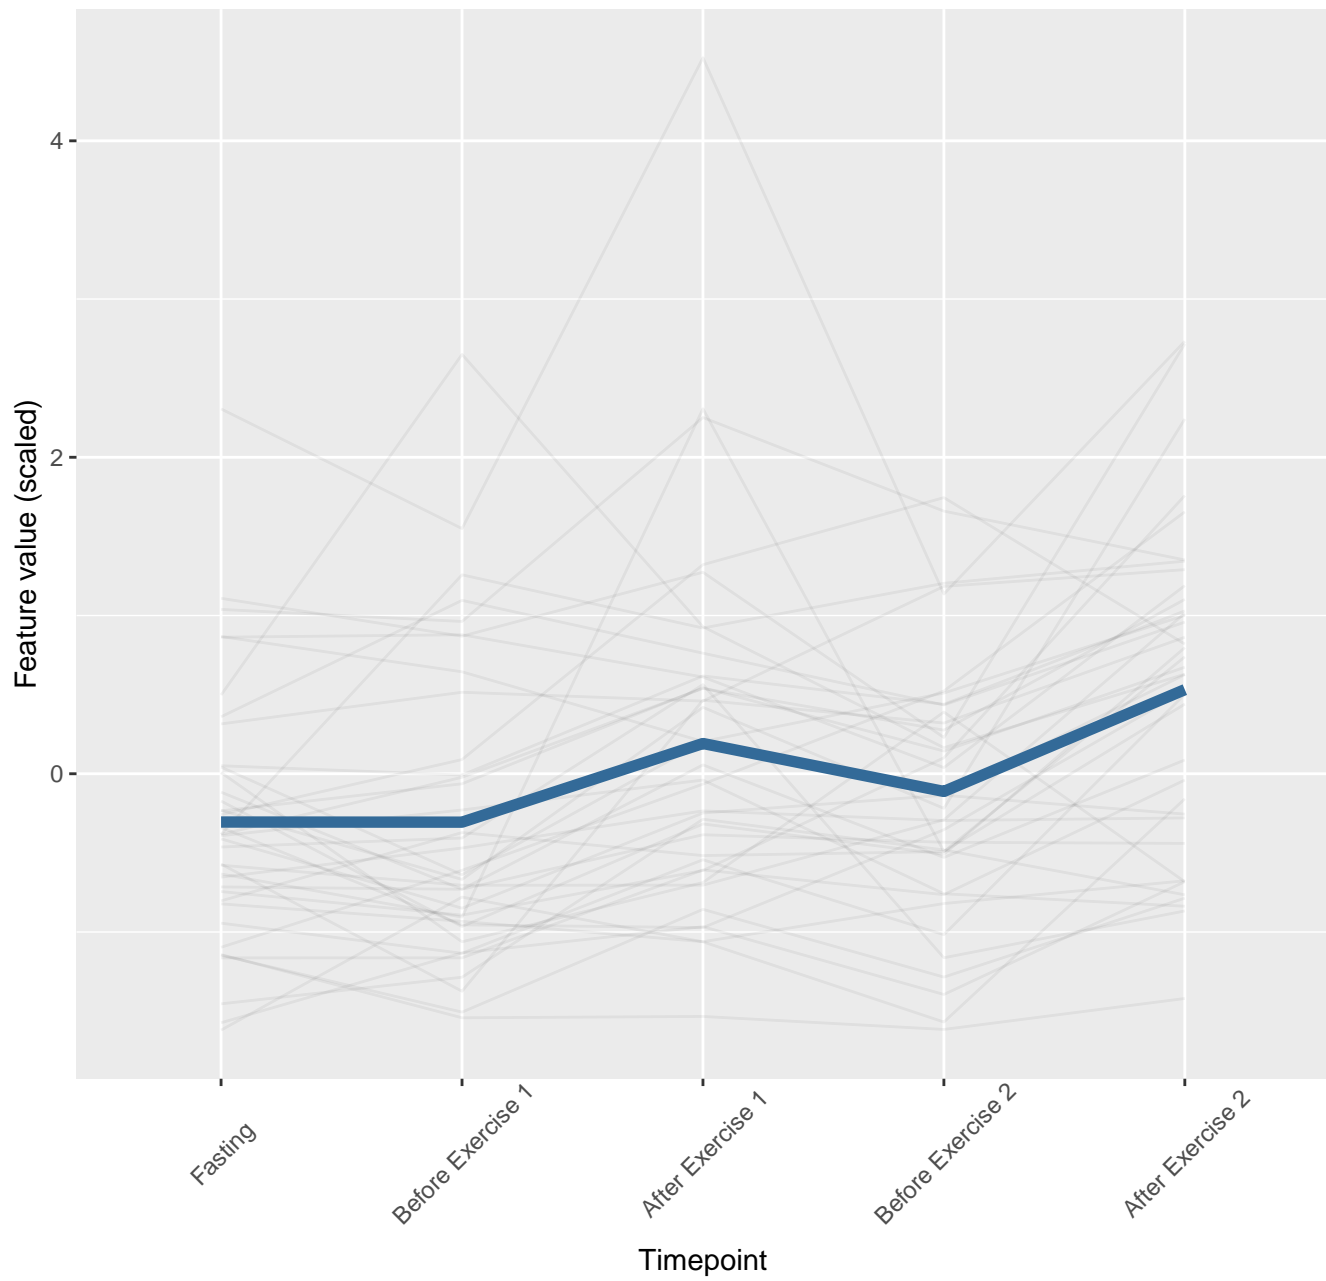

Line plot of TG(53:2).1

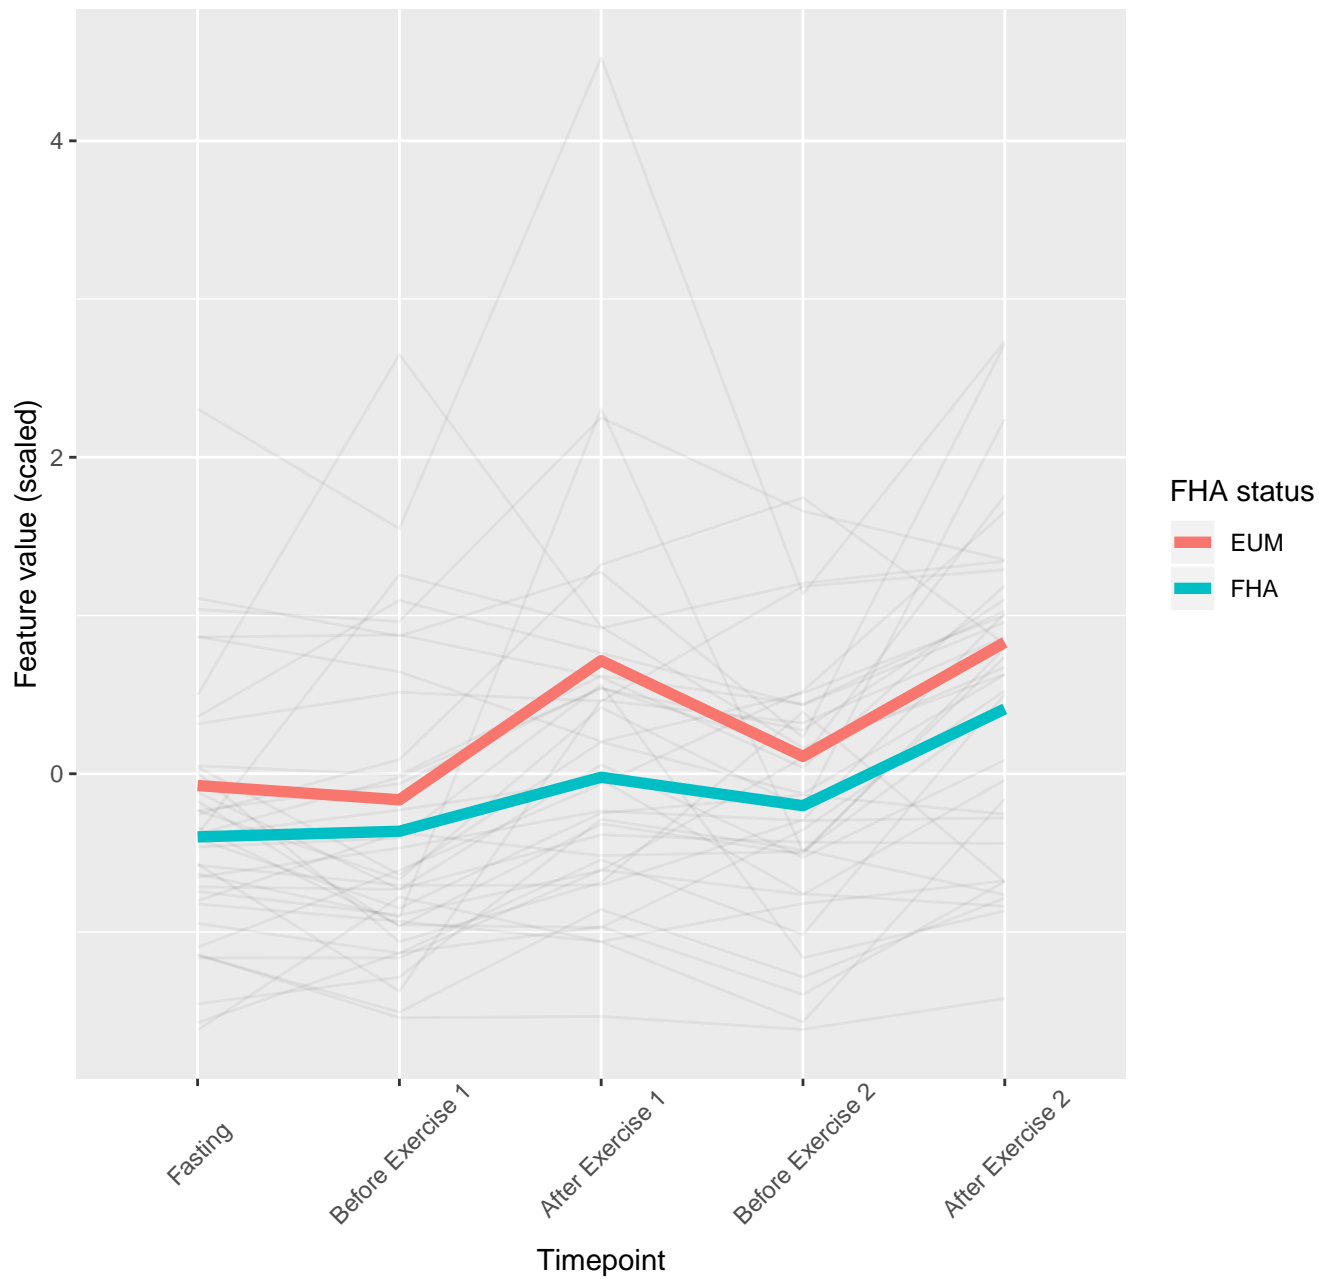

Line plot of TG(53:2).1

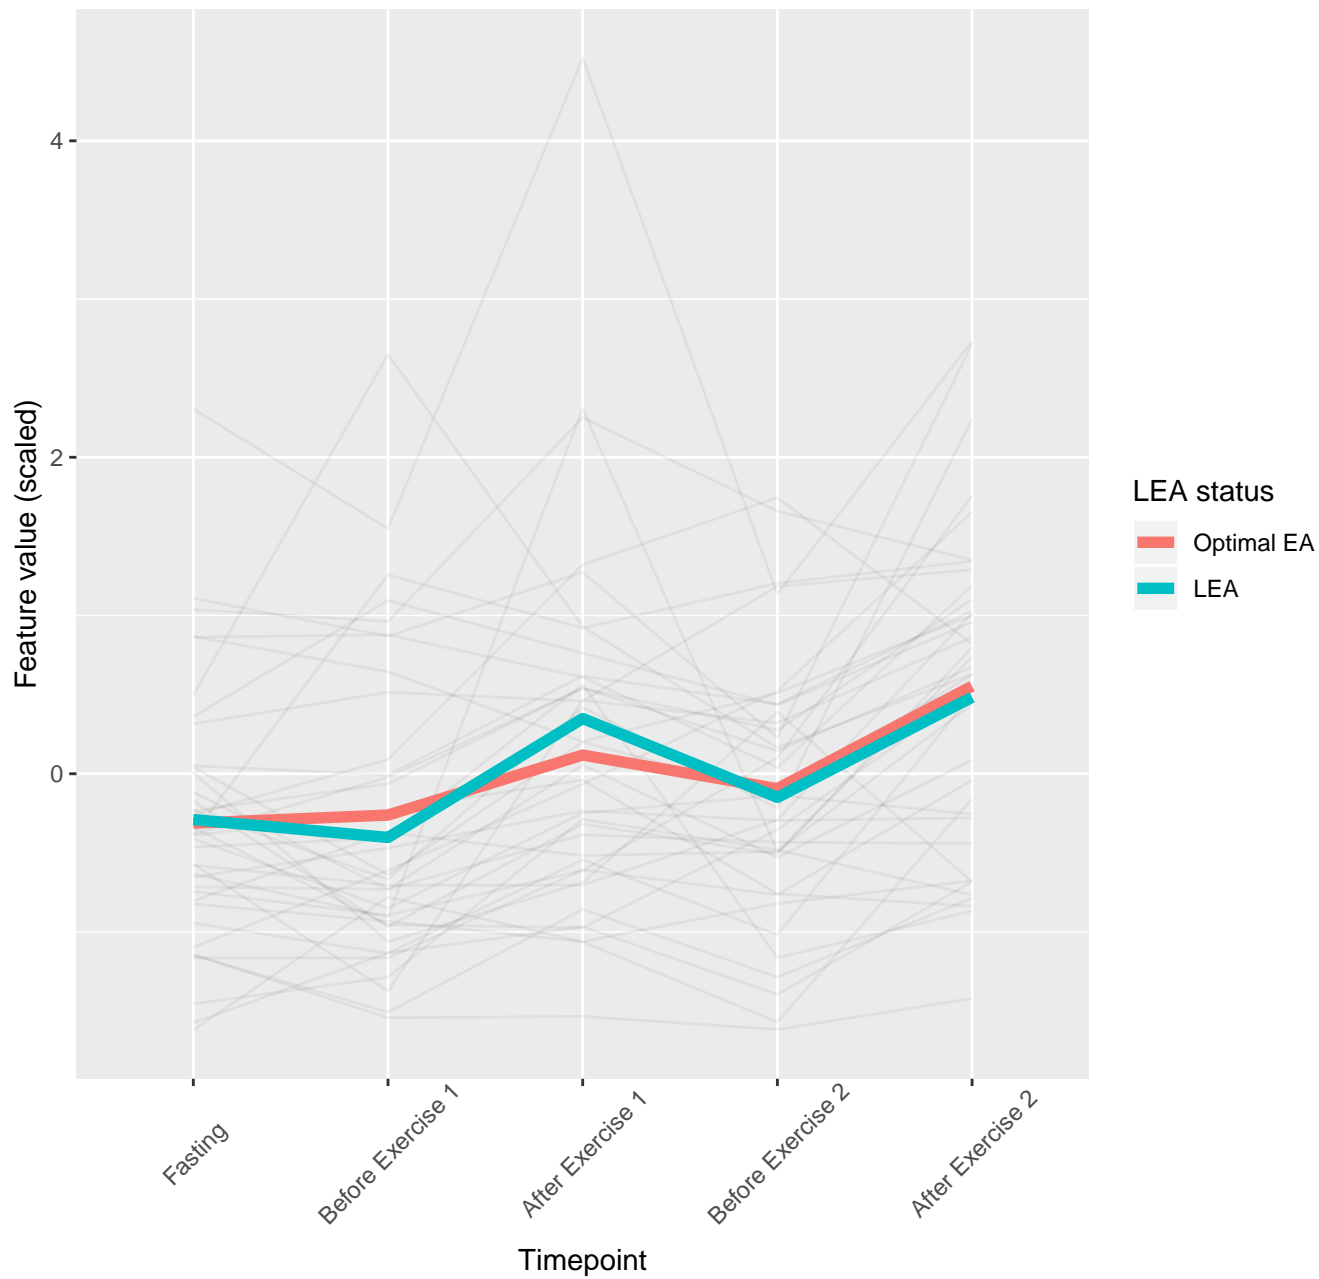

Line plot of TG(53:3)

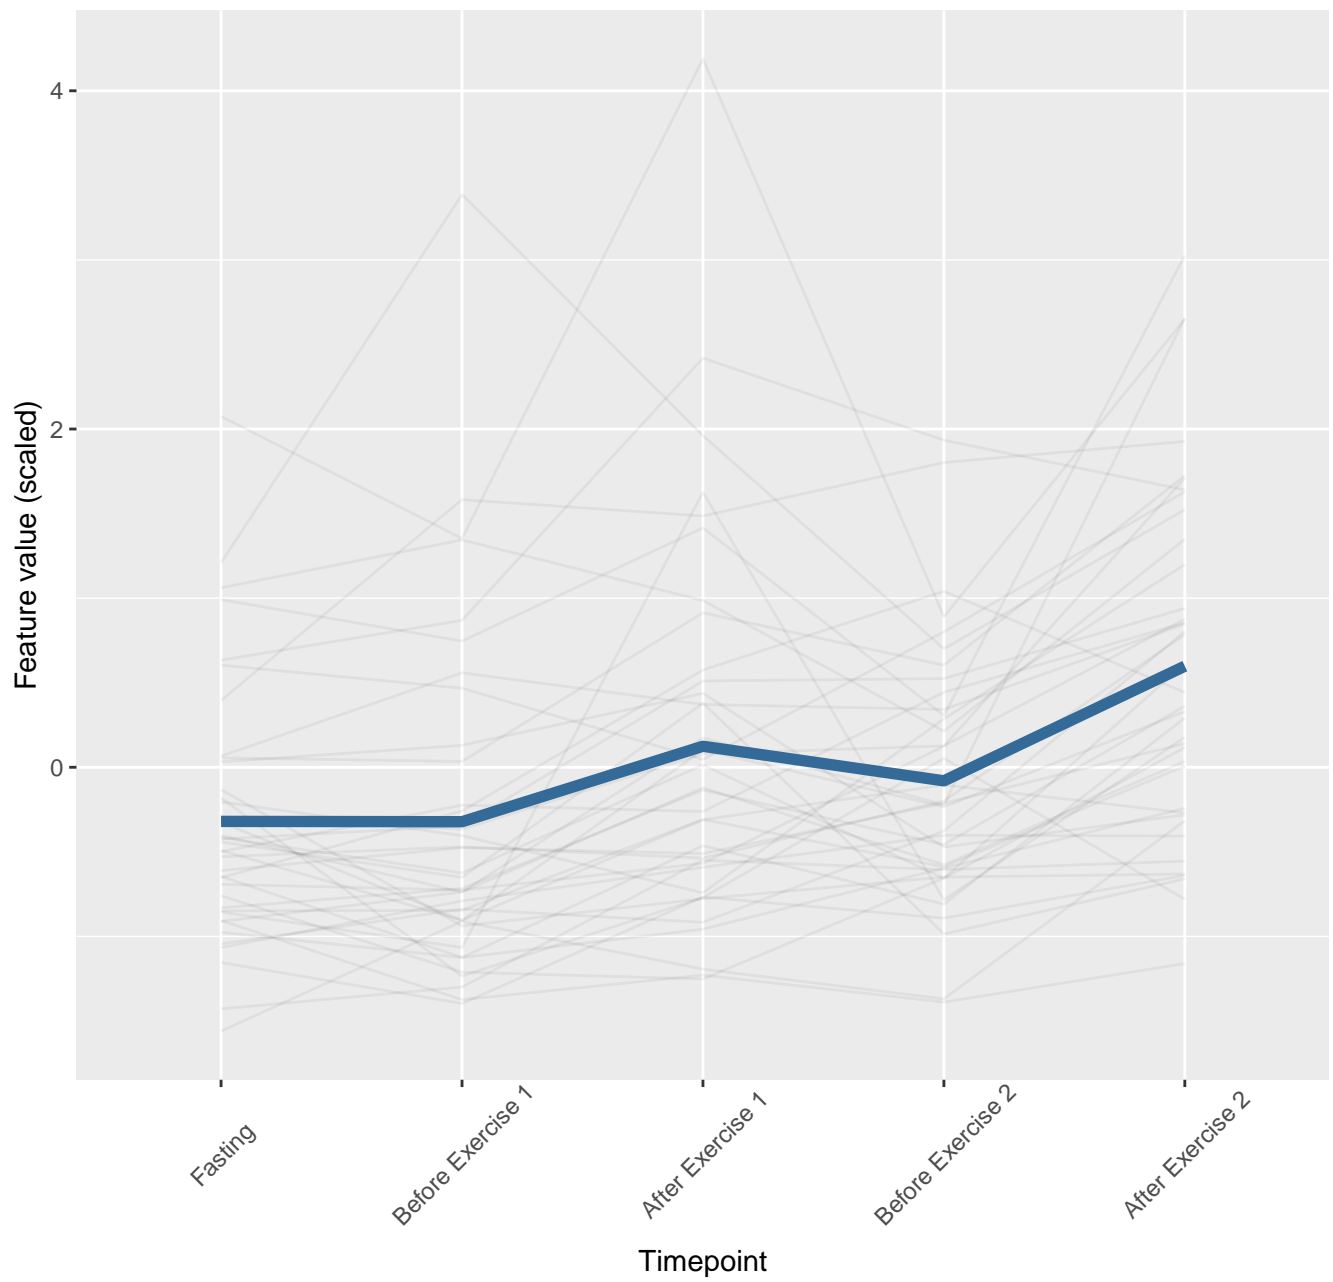

Line plot of TG(53:3)

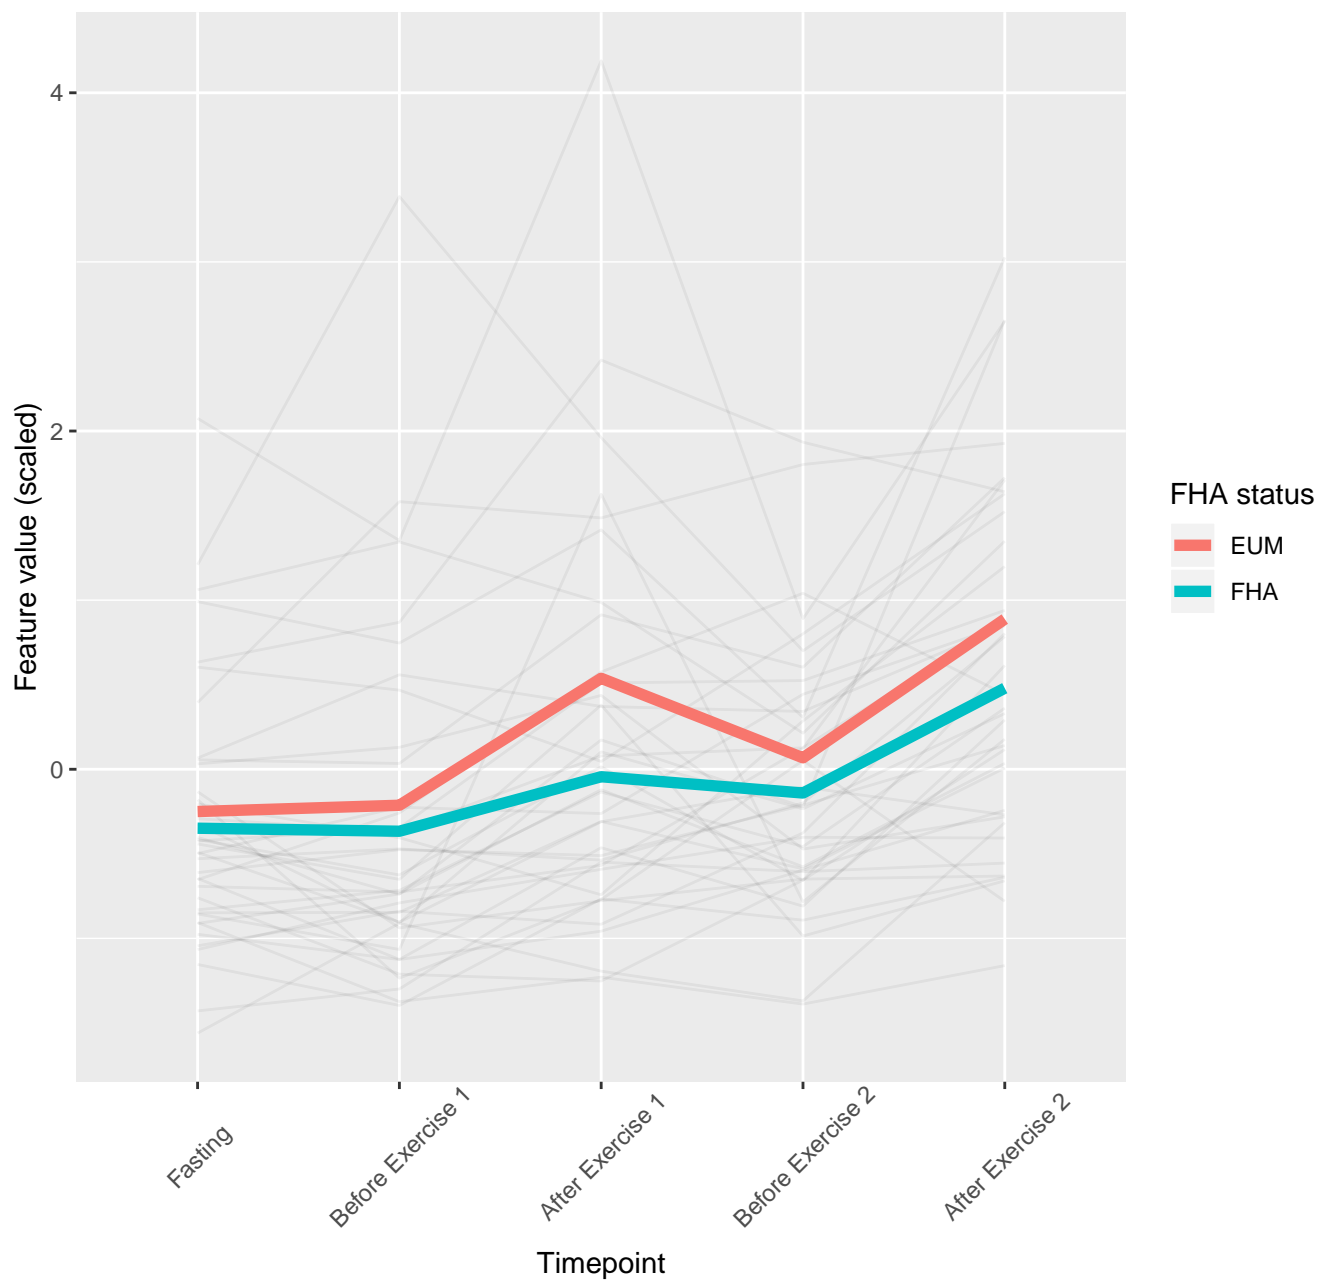

Line plot of TG(53:3)

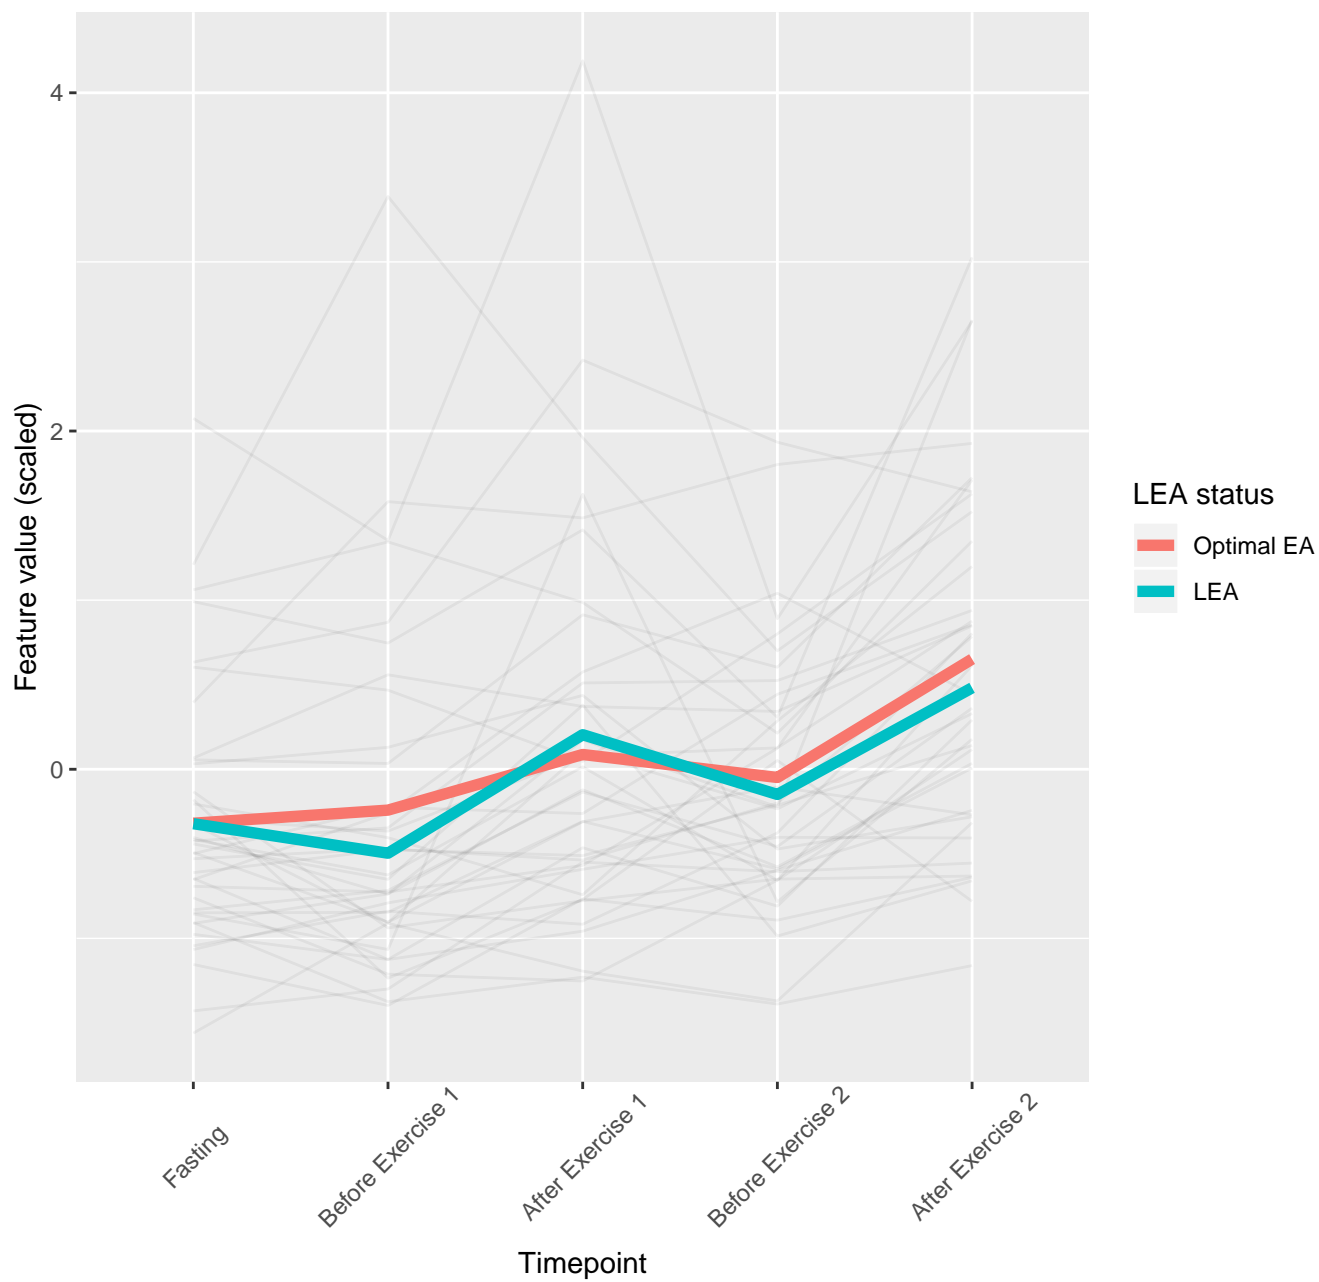



Line plot of TG(53:4)

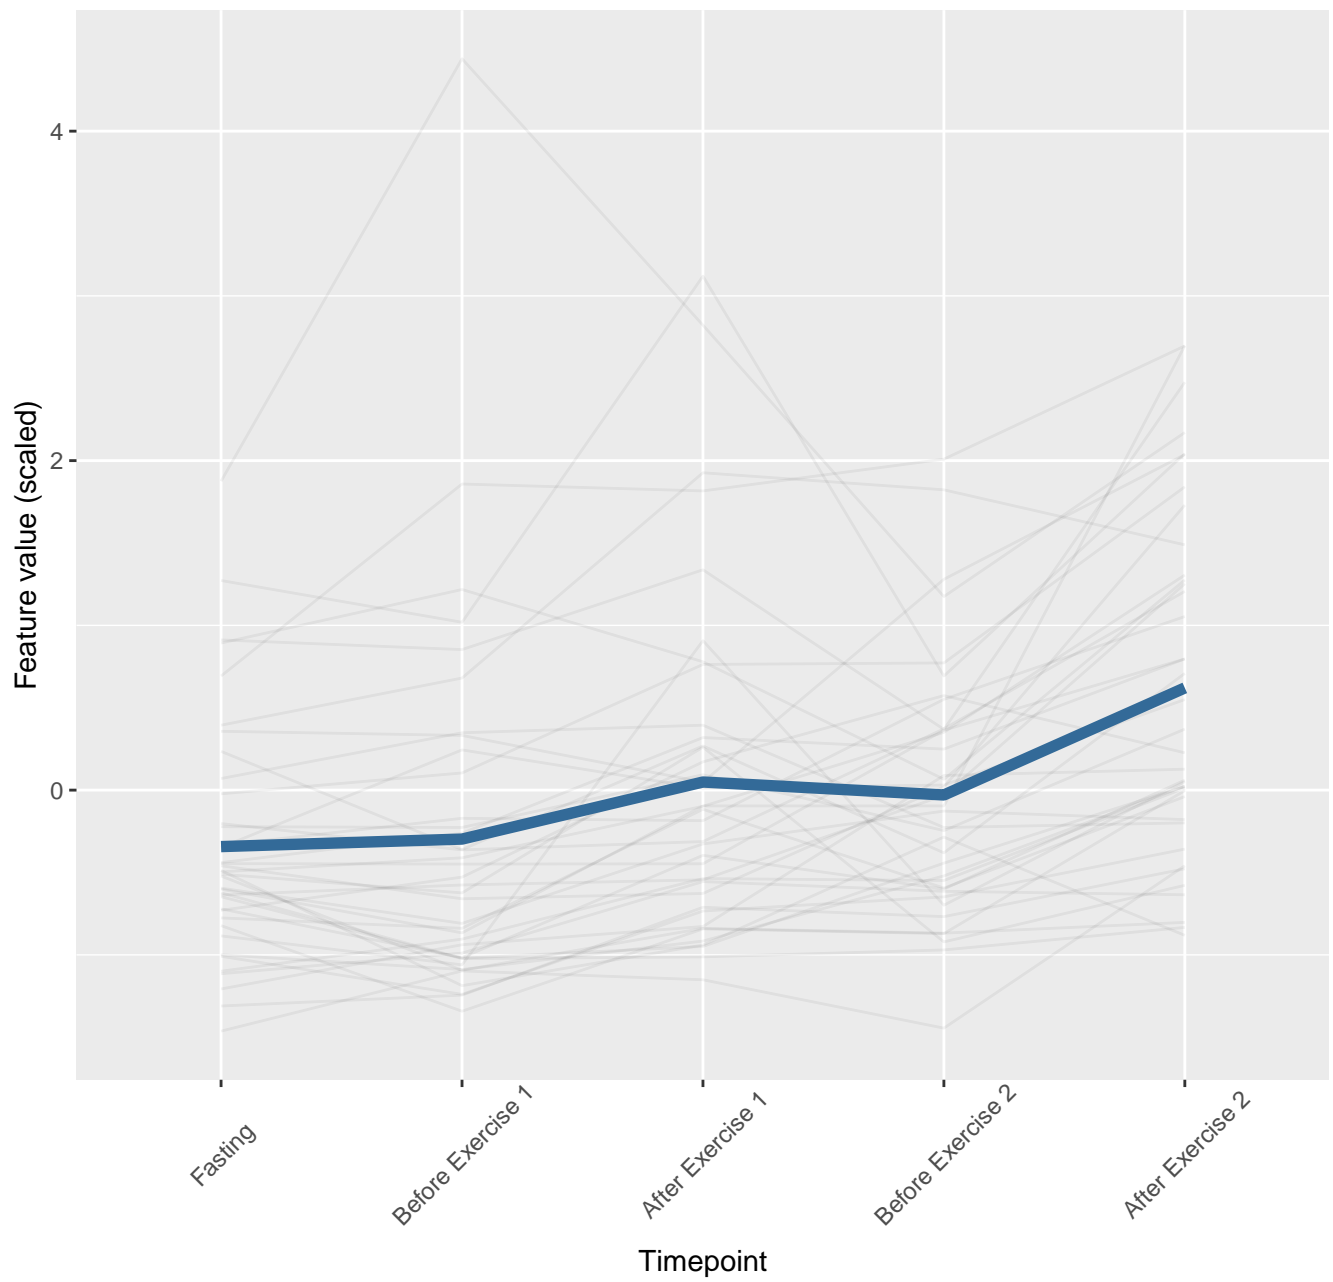

Line plot of TG(53:4)

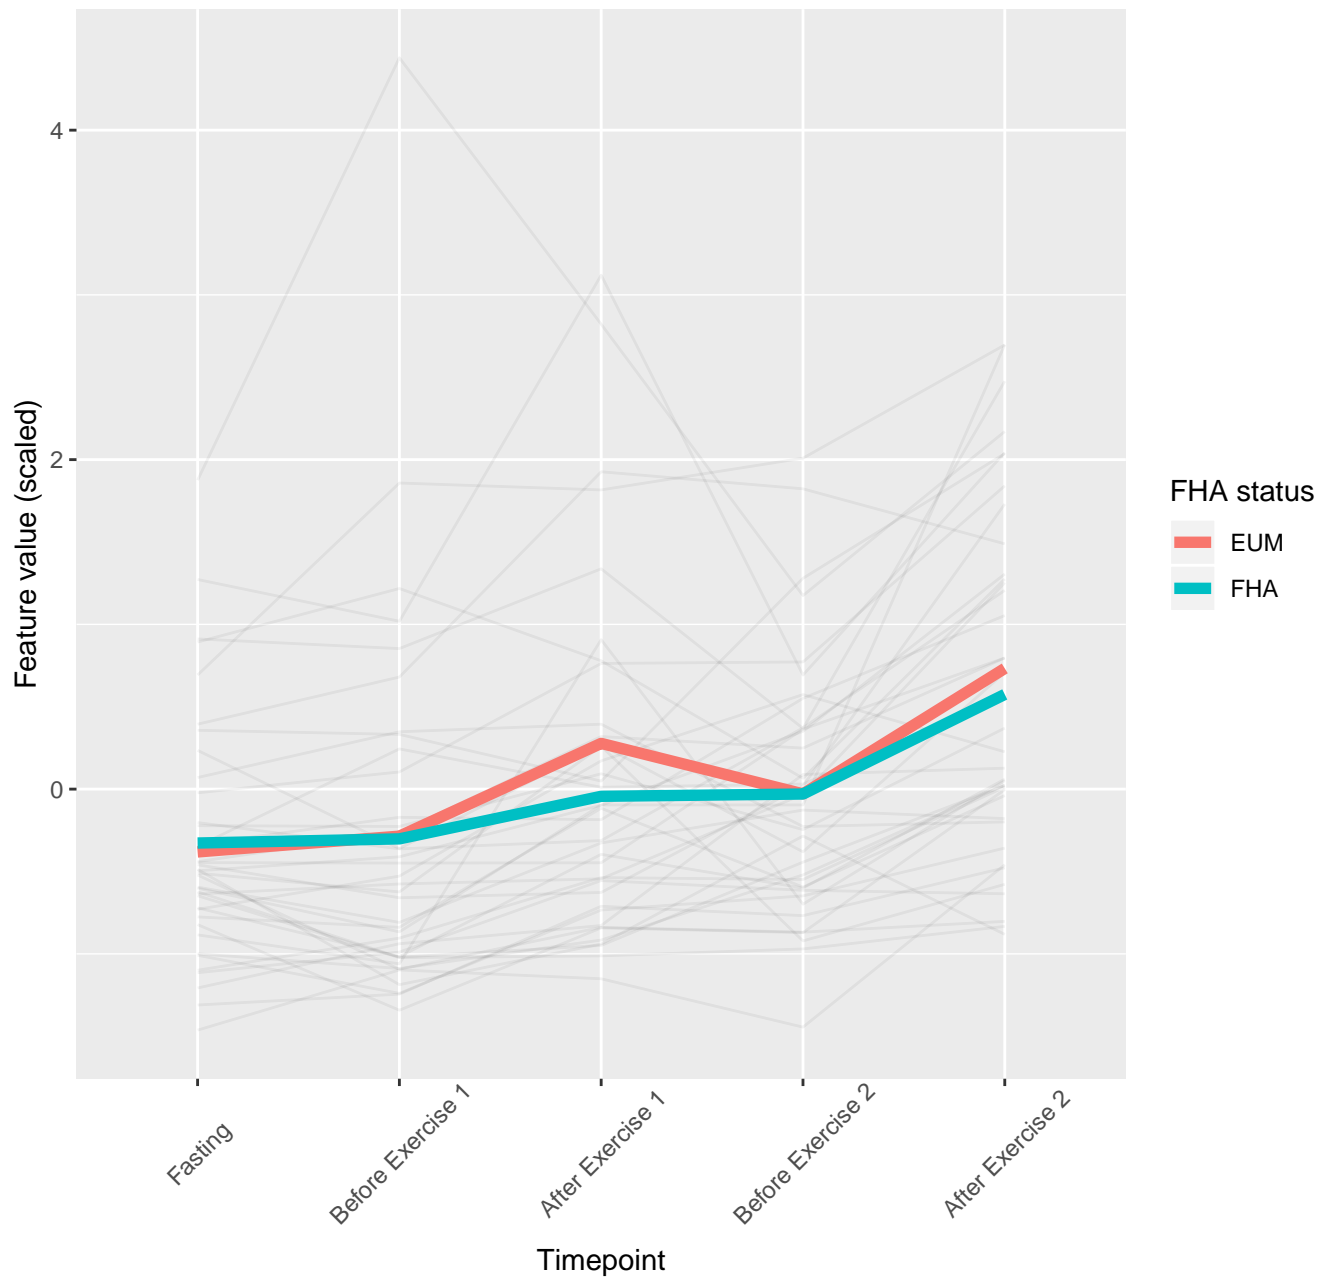

Line plot of TG(53:4)

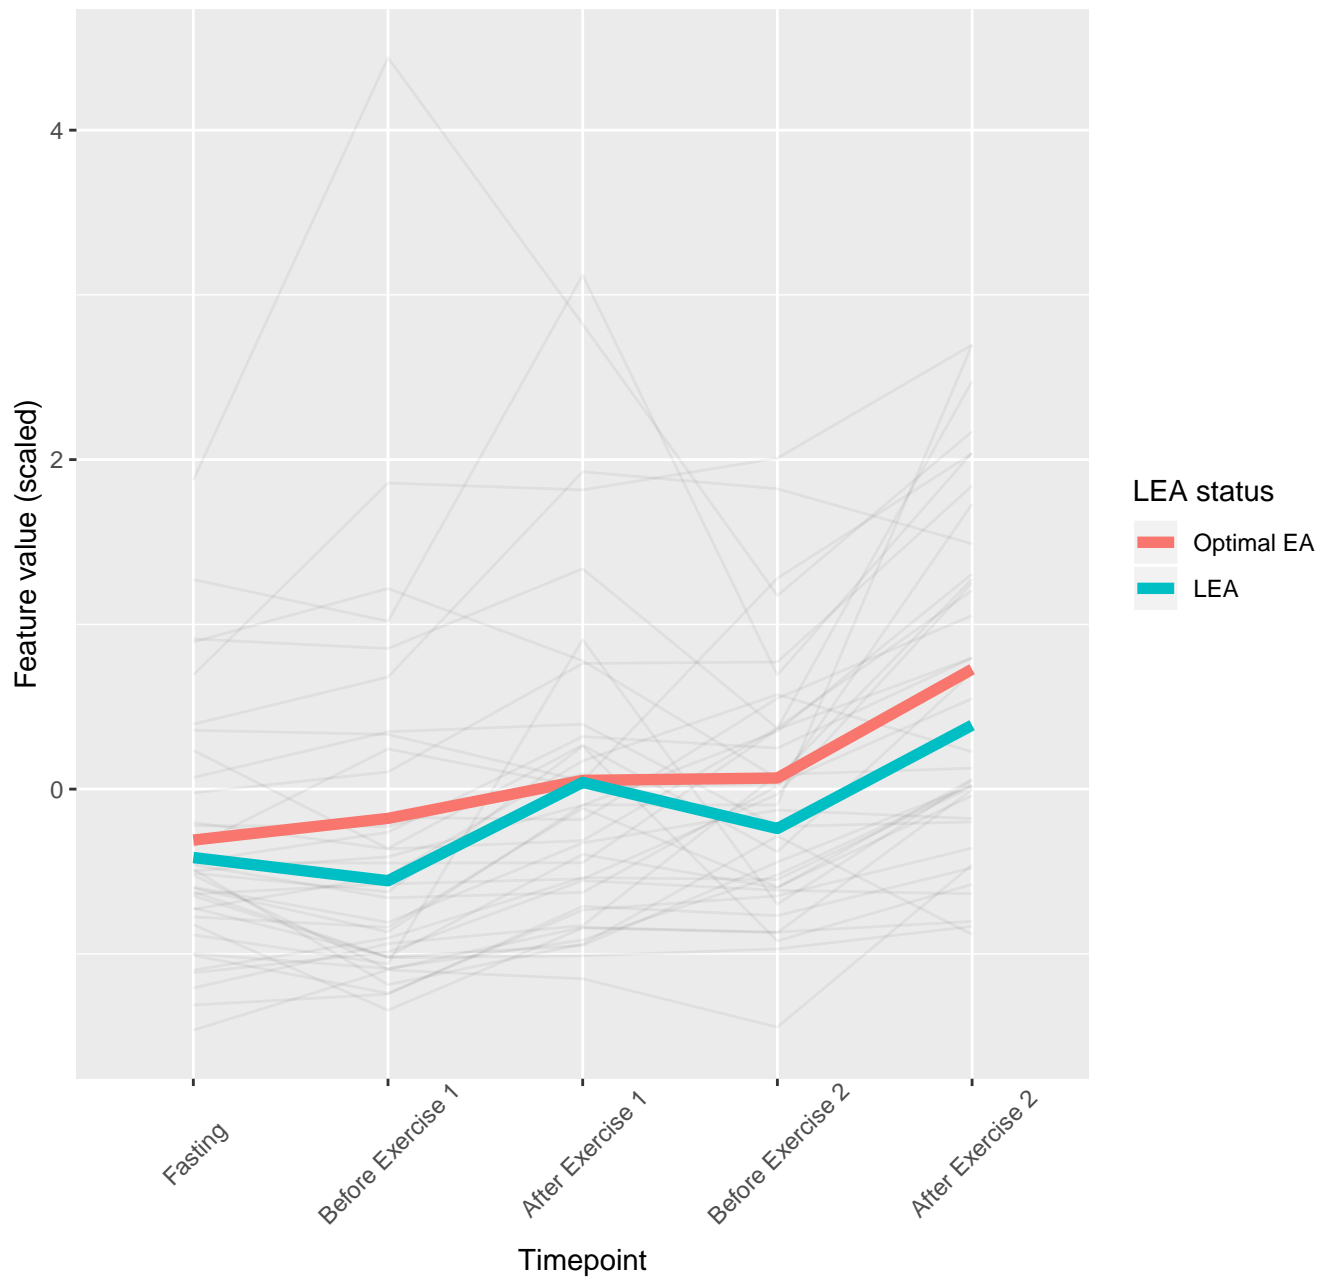

Line plot of TG(53:5)

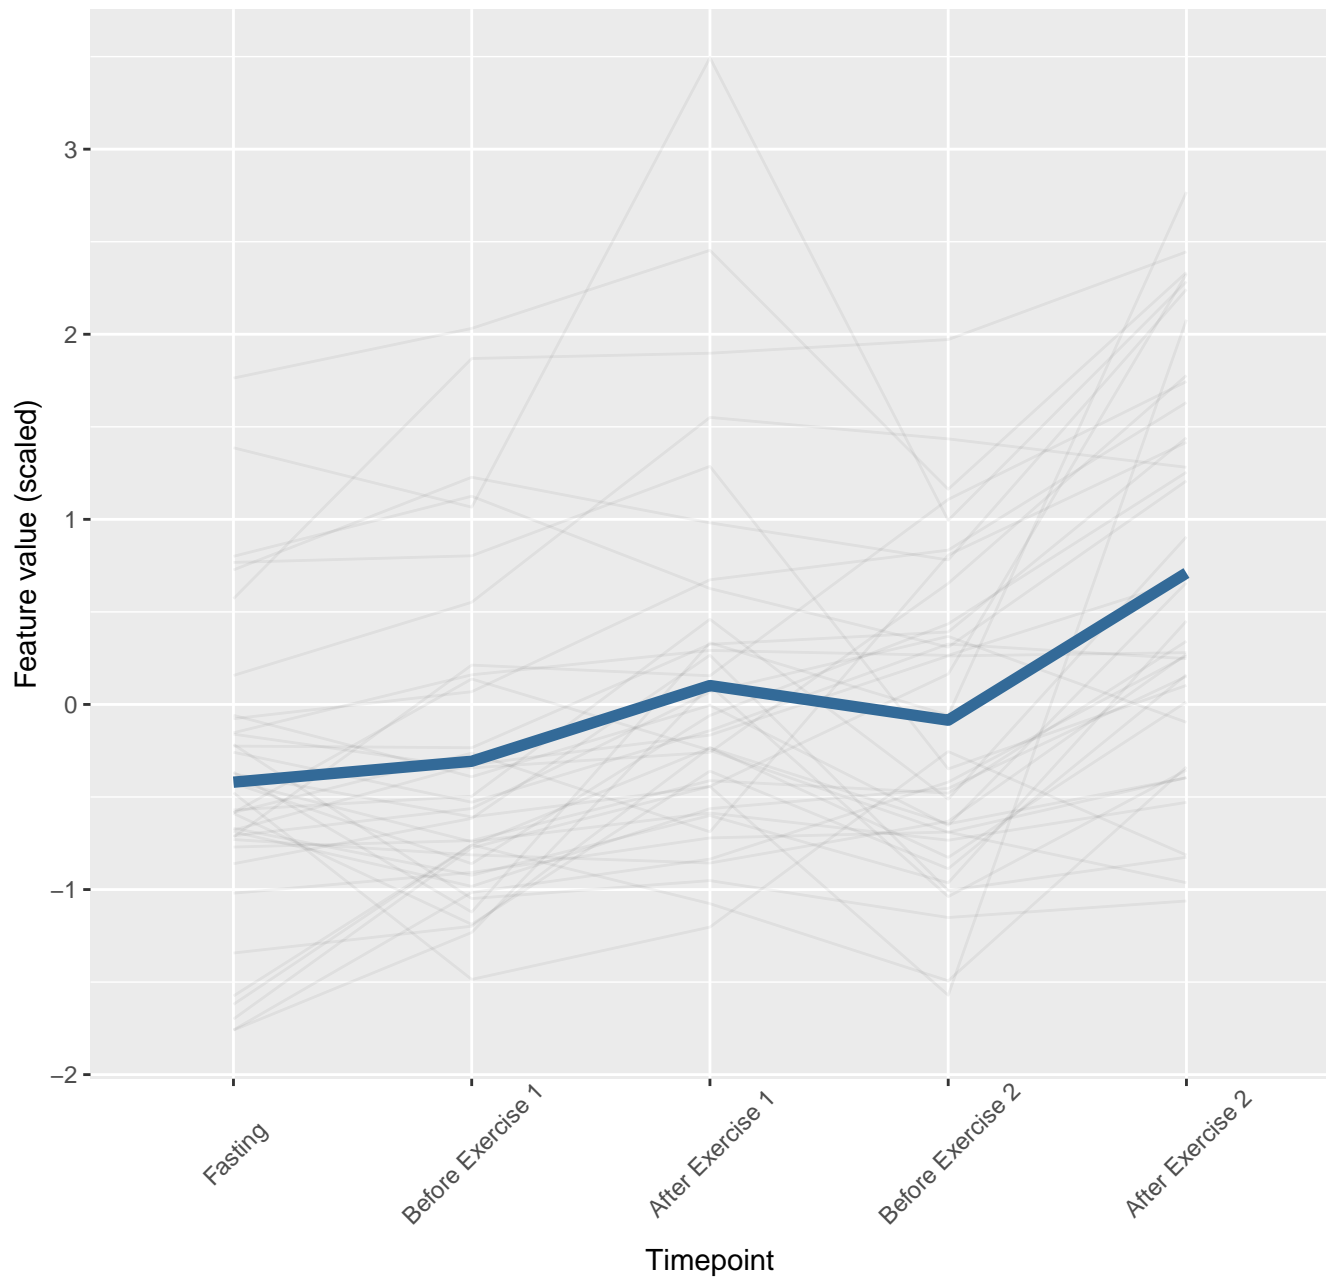

Line plot of TG(53:5)

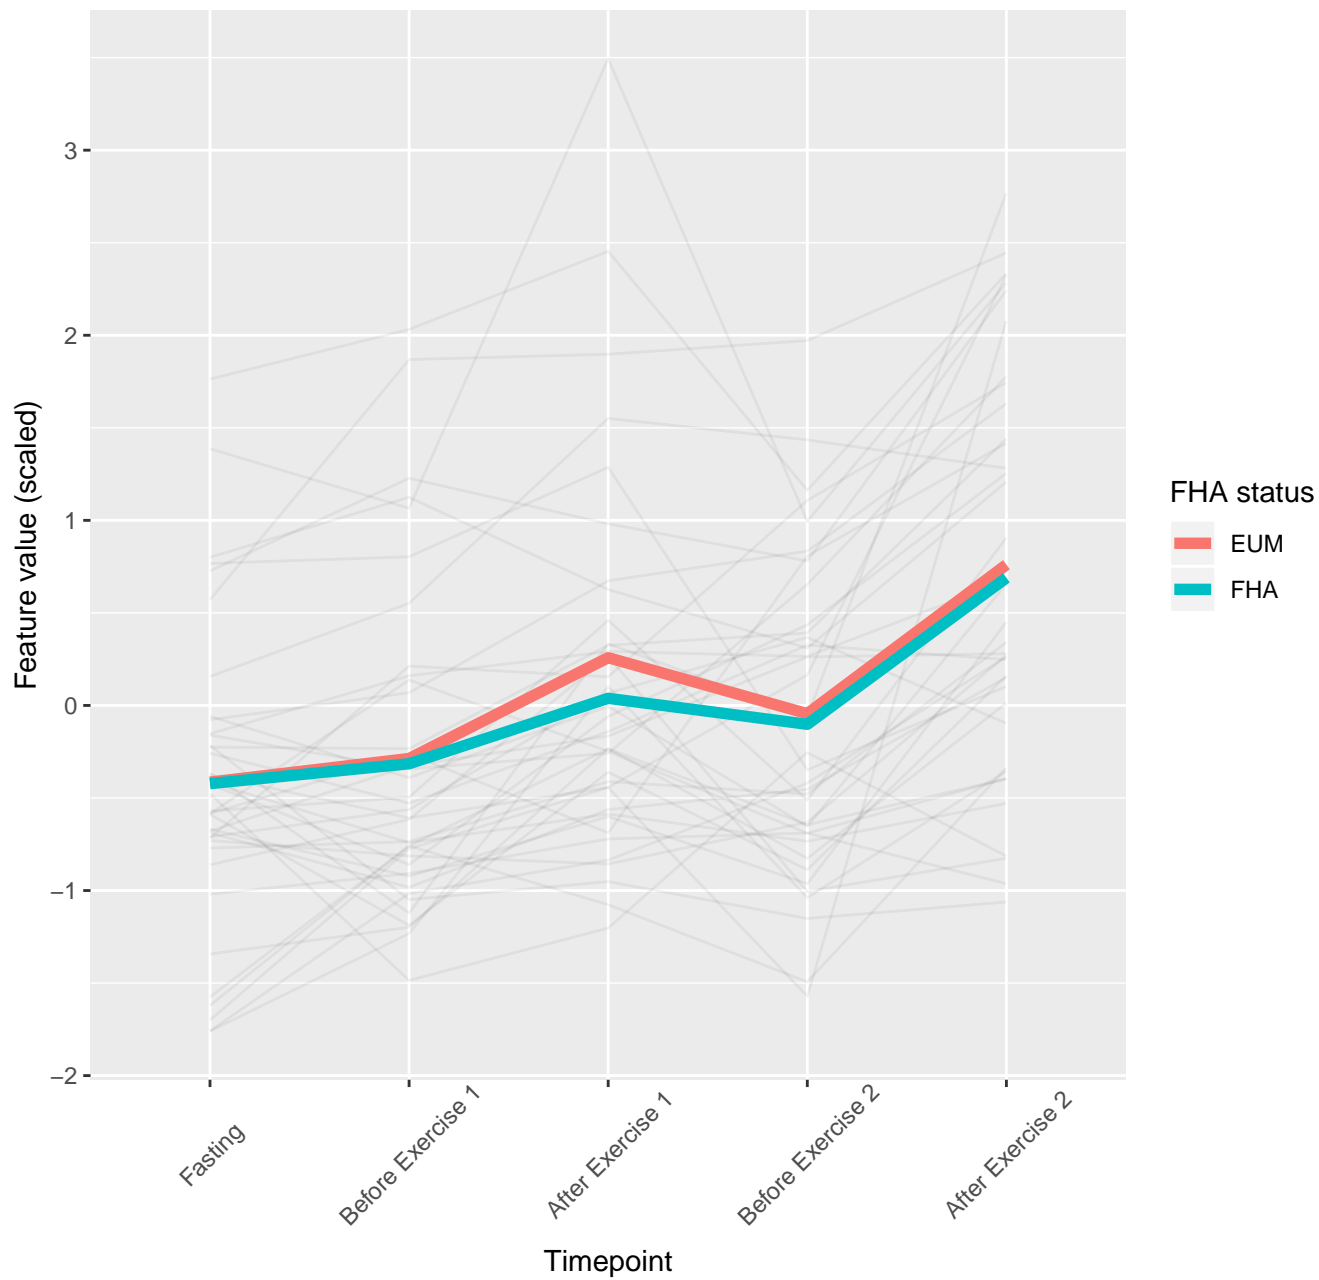

Line plot of TG(53:5)

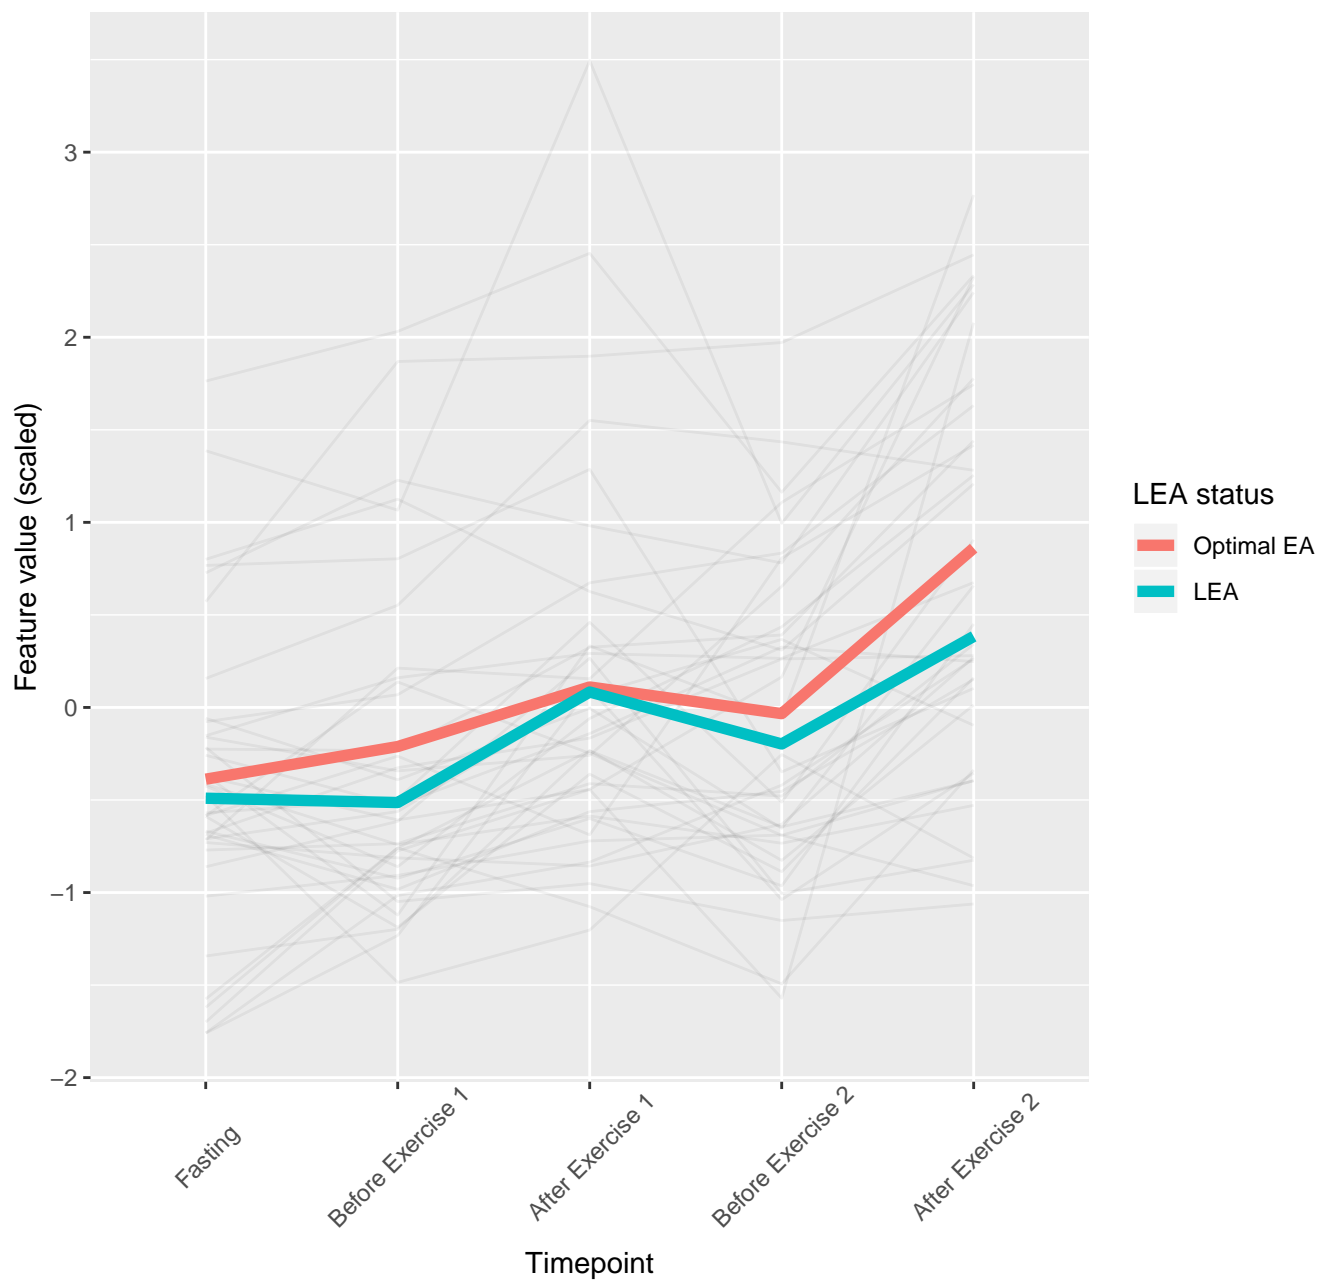

Line plot of TG(54:1)

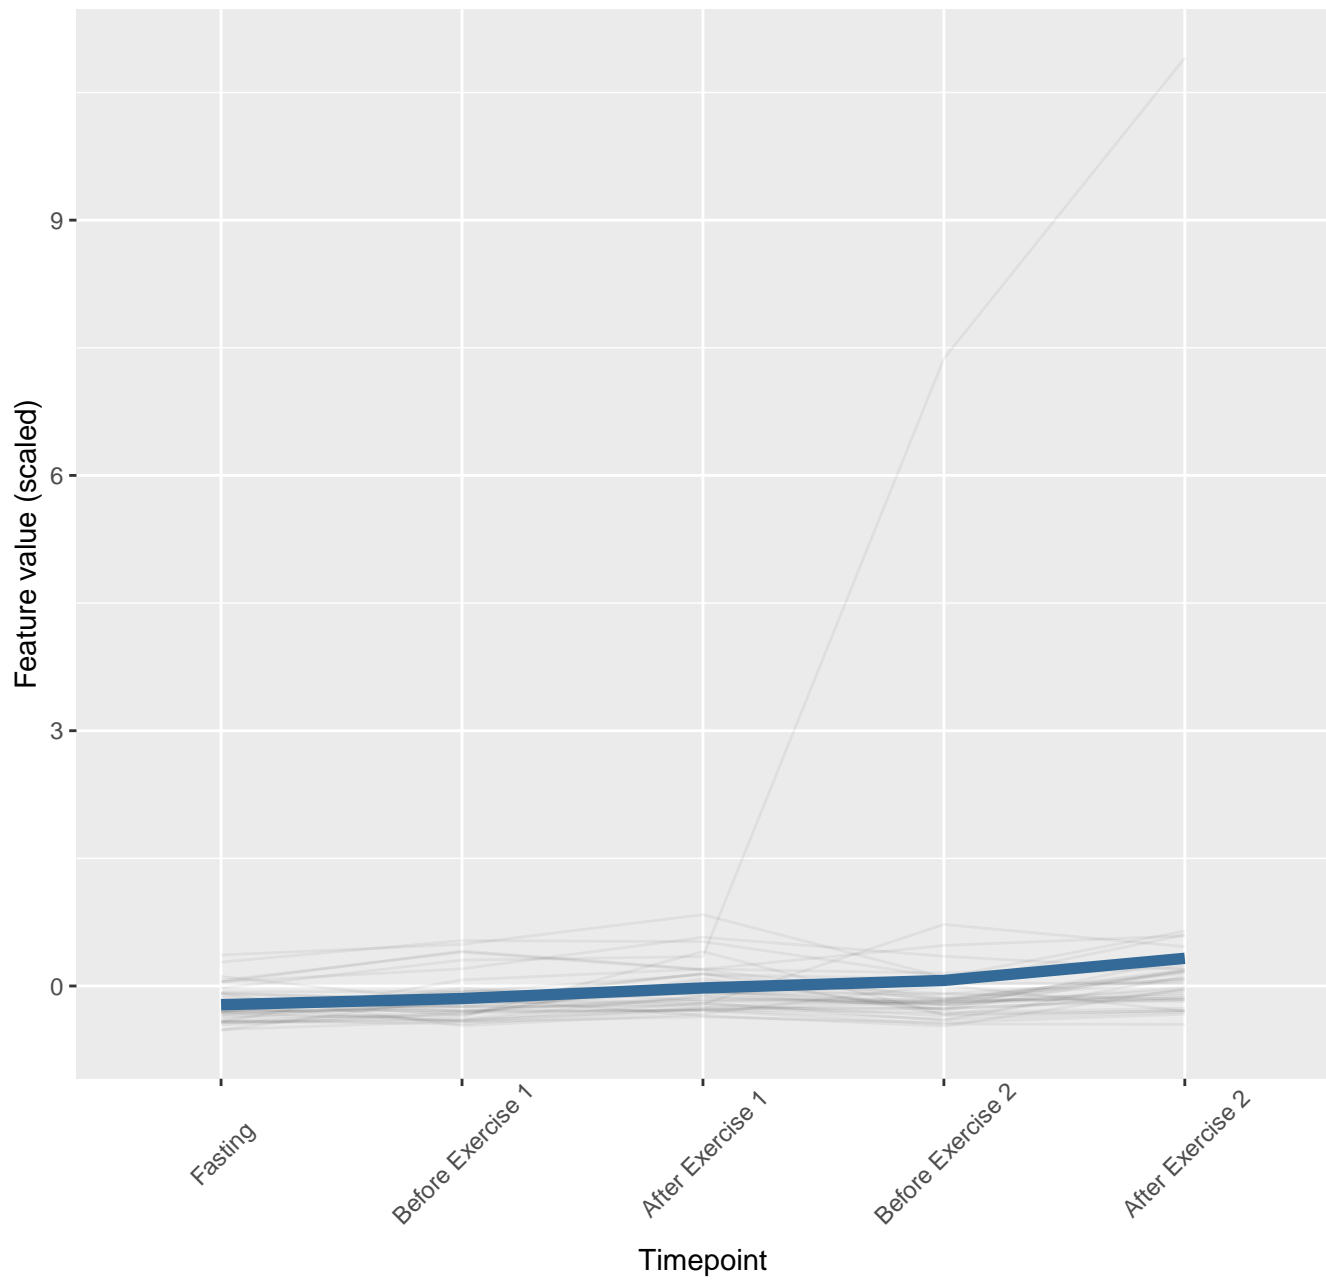

Line plot of TG(54:1)

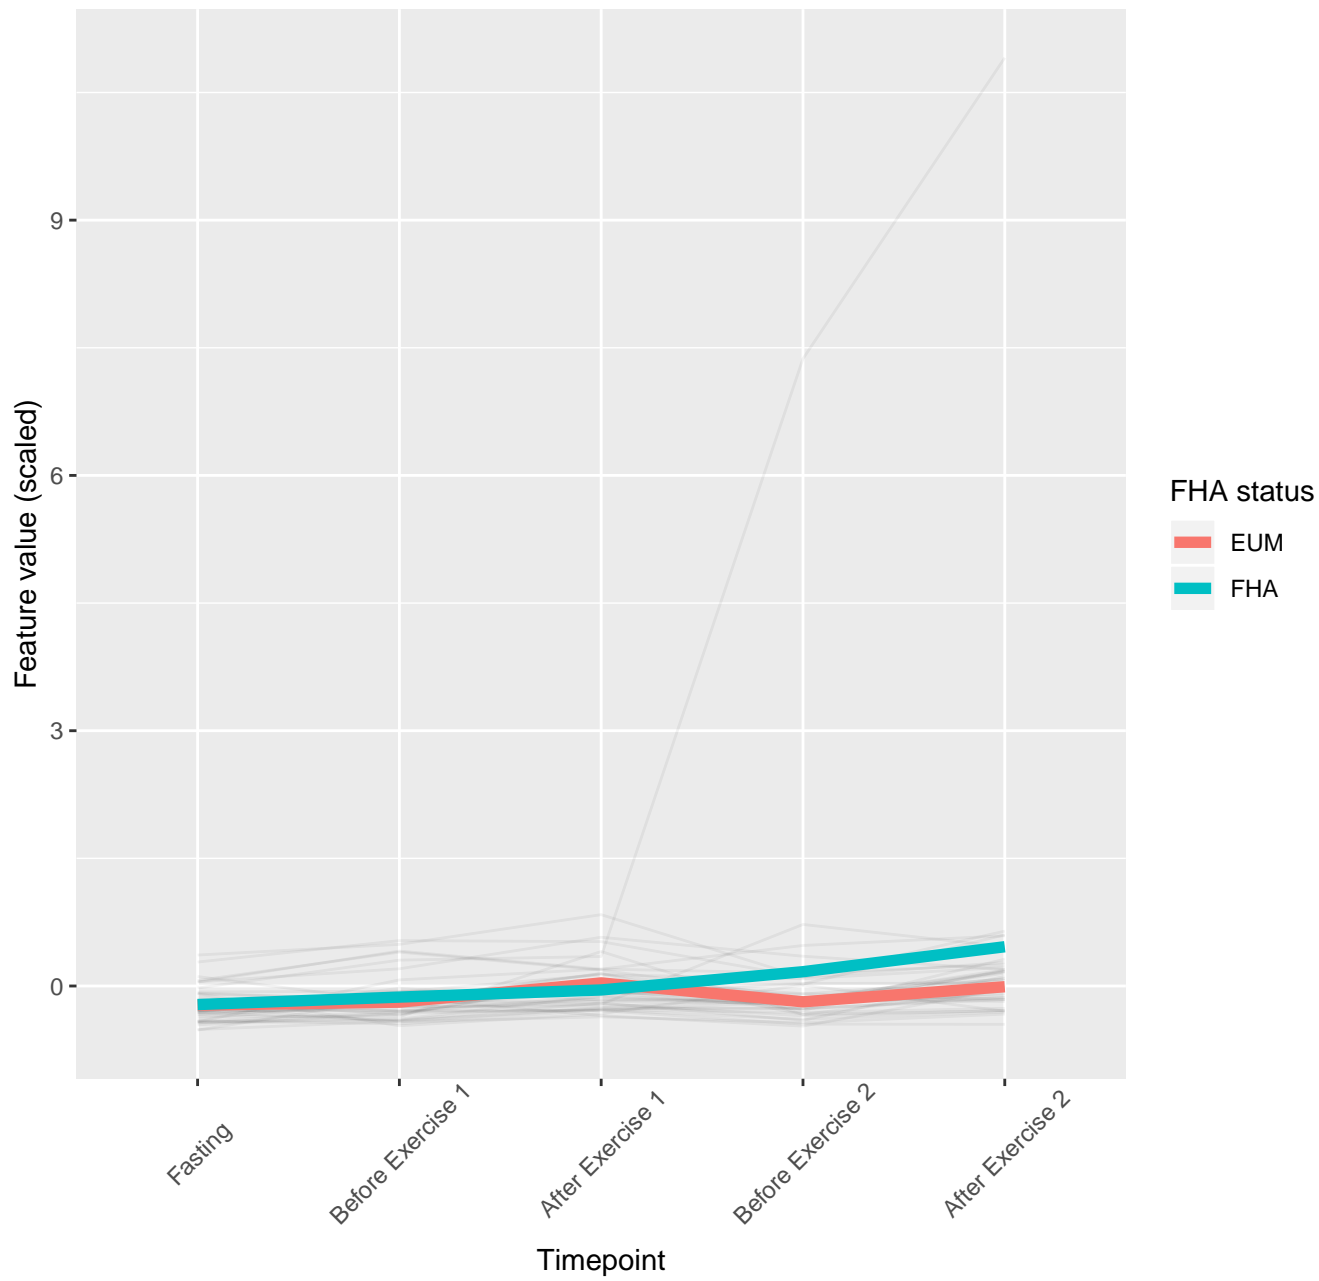



Line plot of TG(54:1)

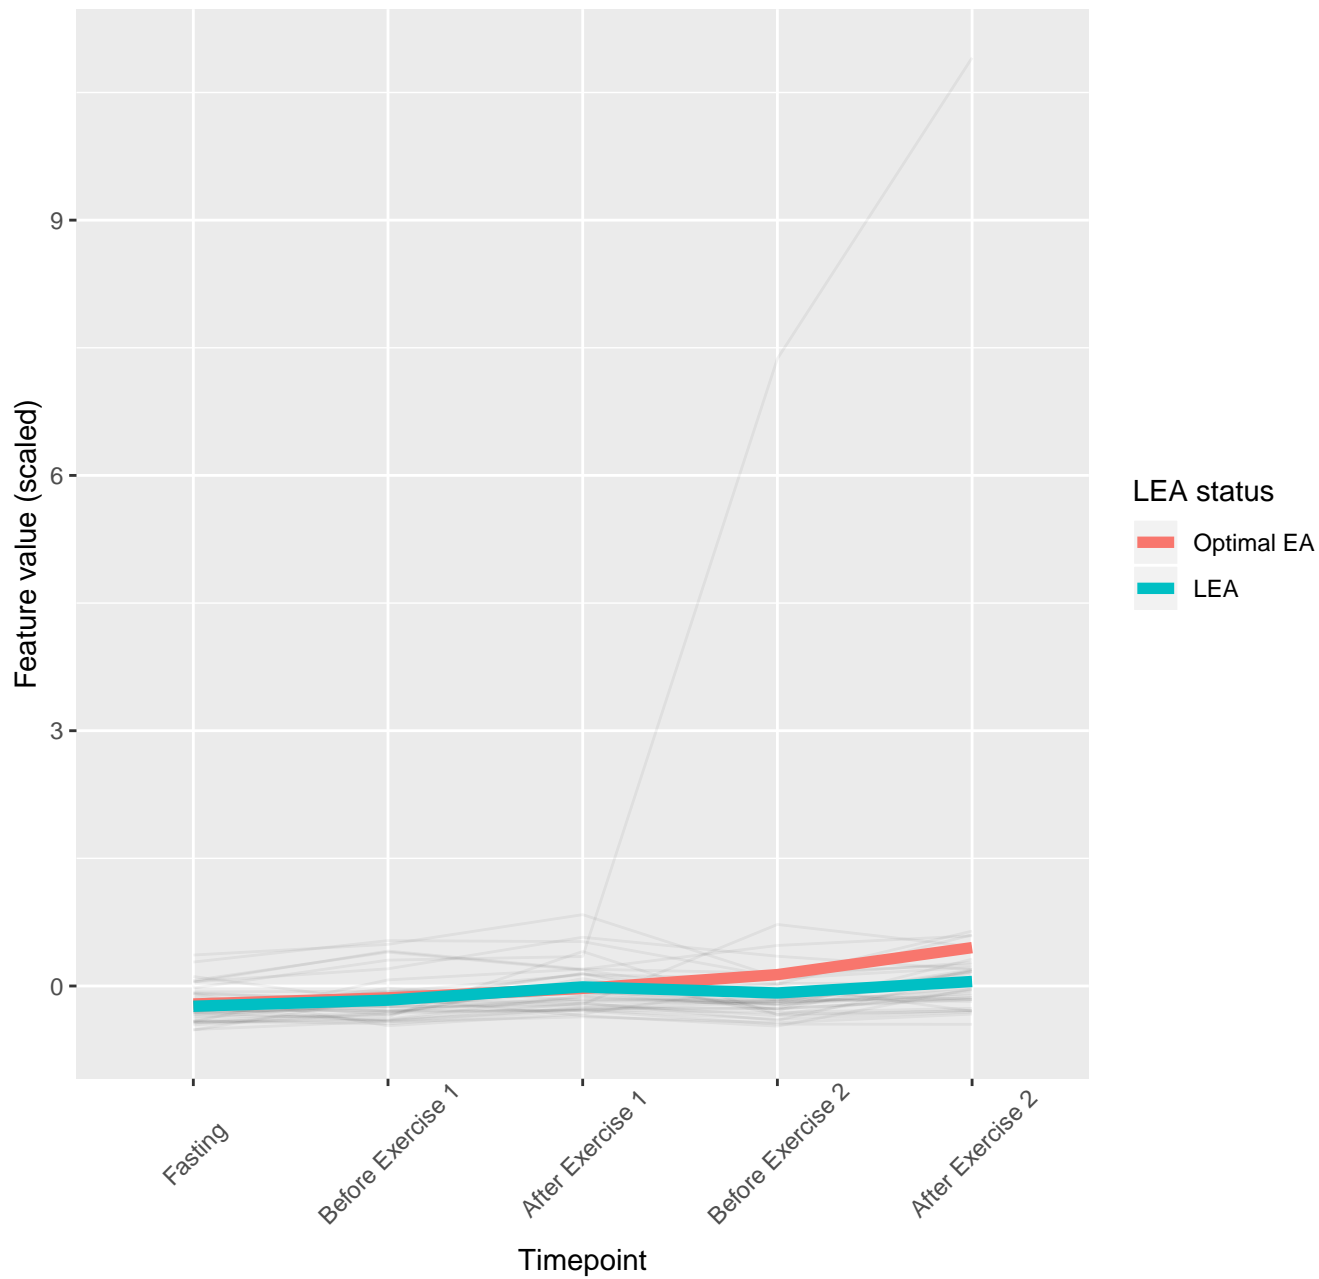

Line plot of TG(54:2)

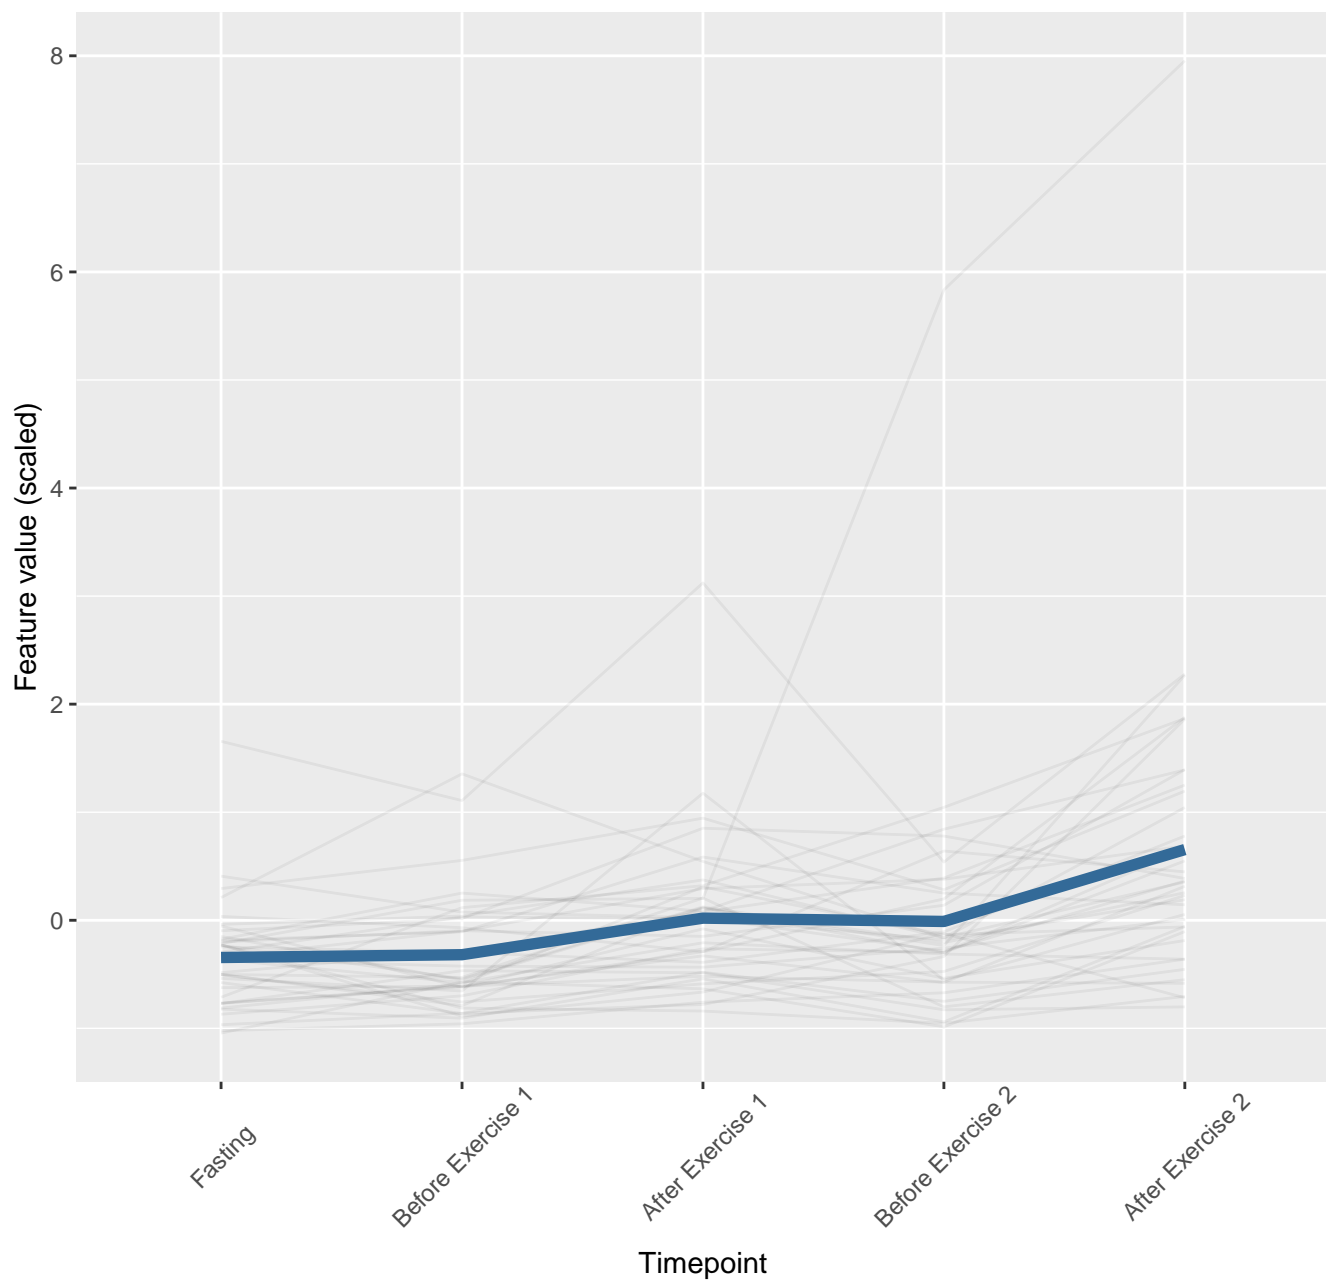

Line plot of TG(54:2)

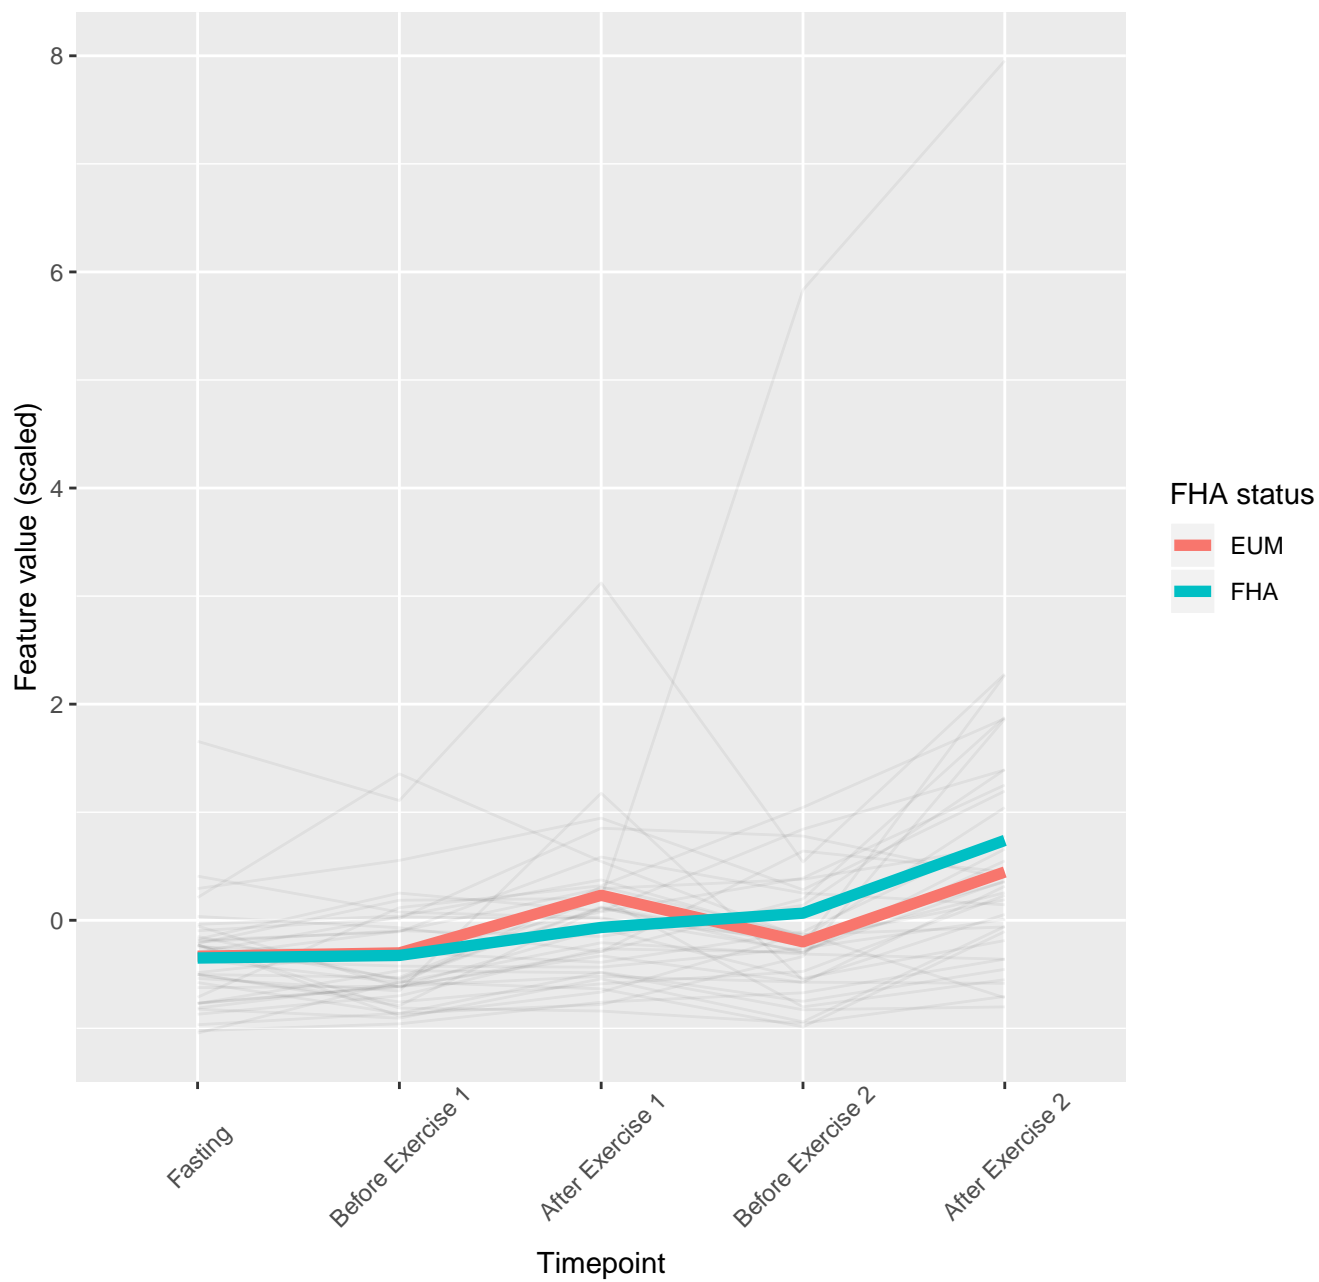

Line plot of TG(54:2)

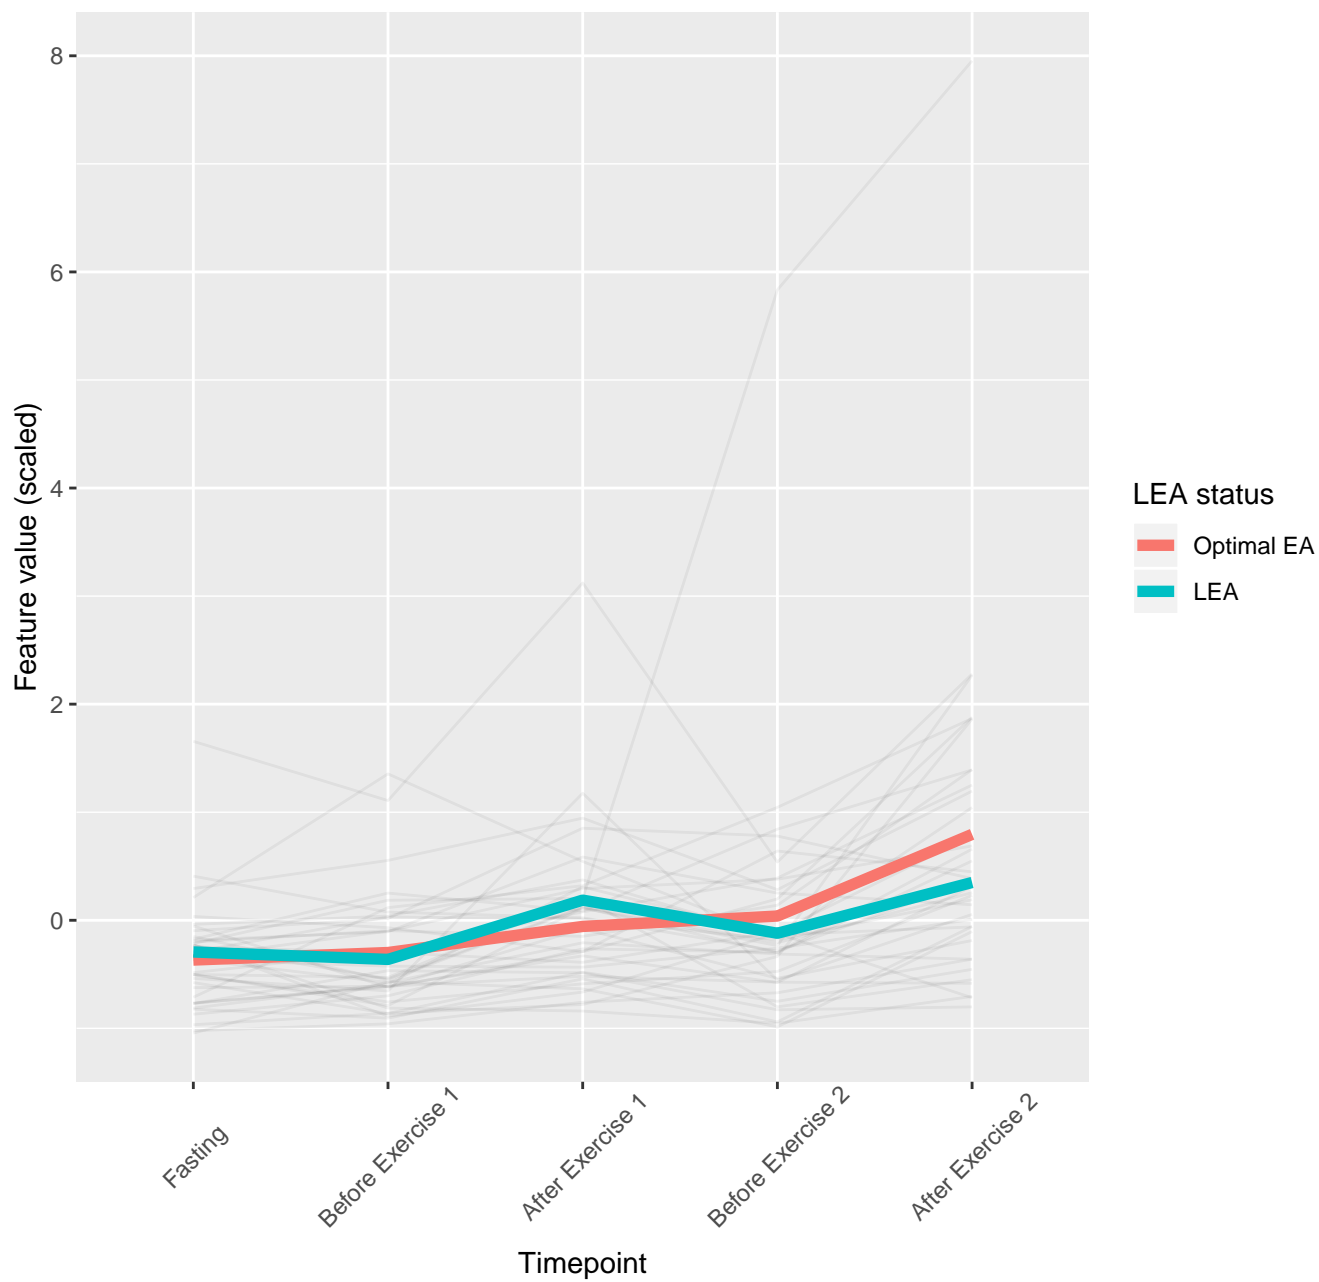

Line plot of TG(54:3)

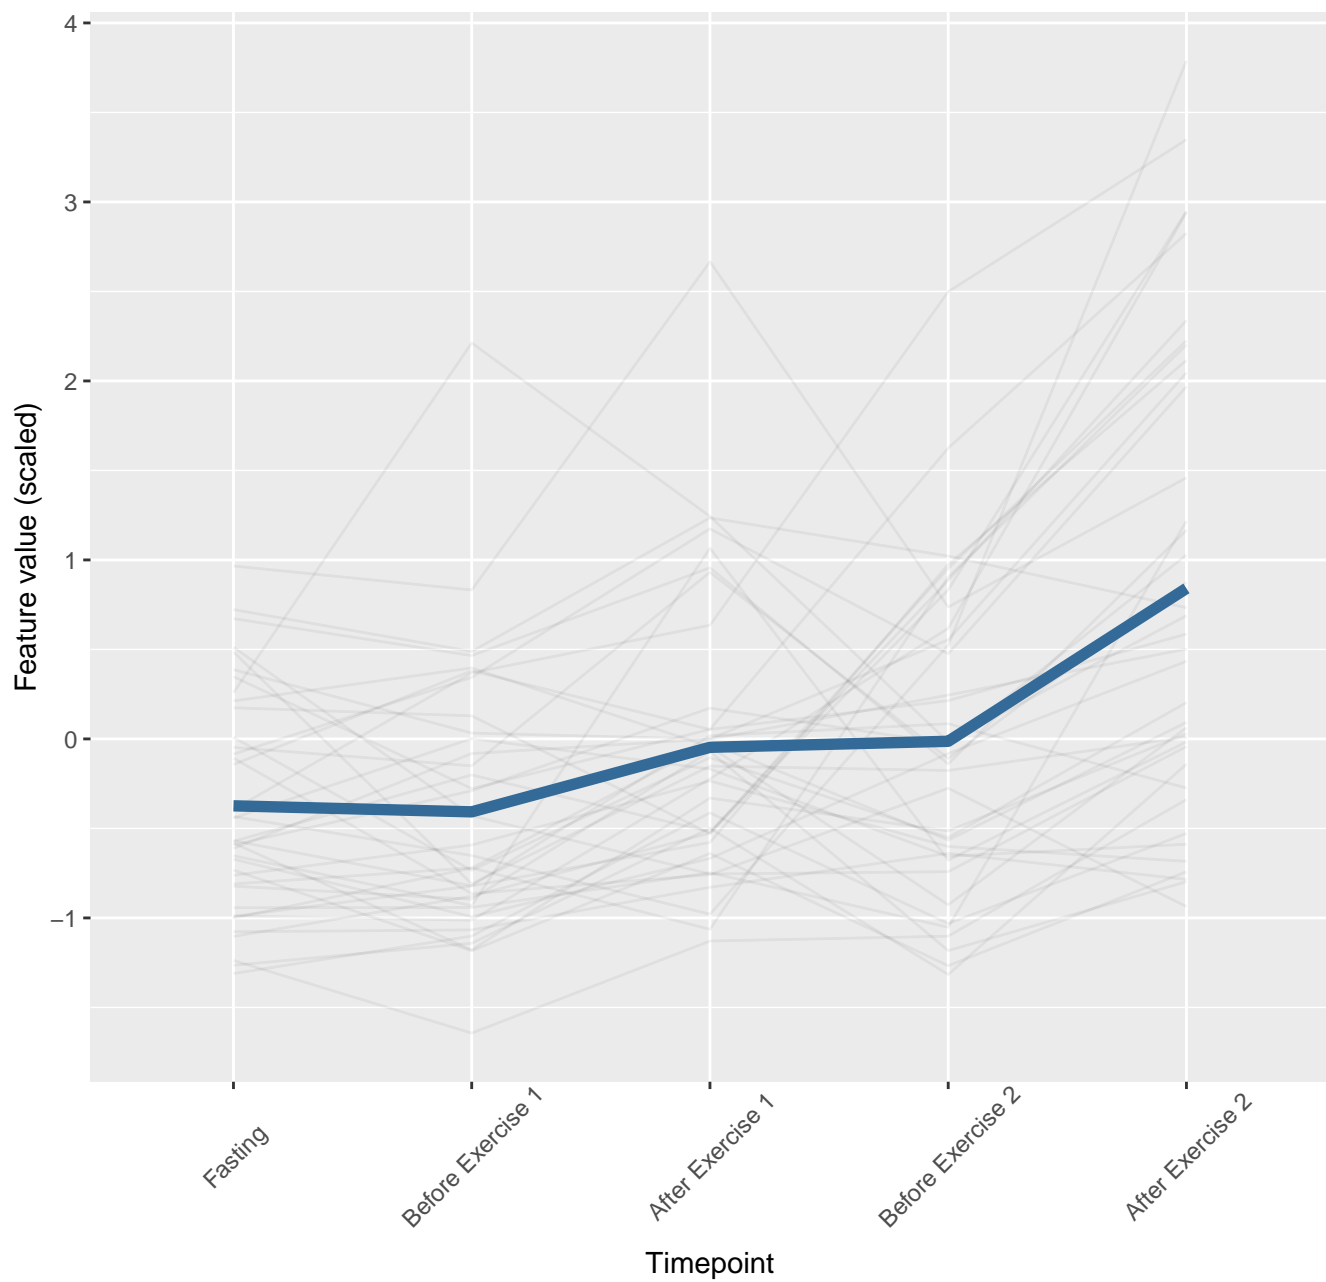

Line plot of TG(54:3)

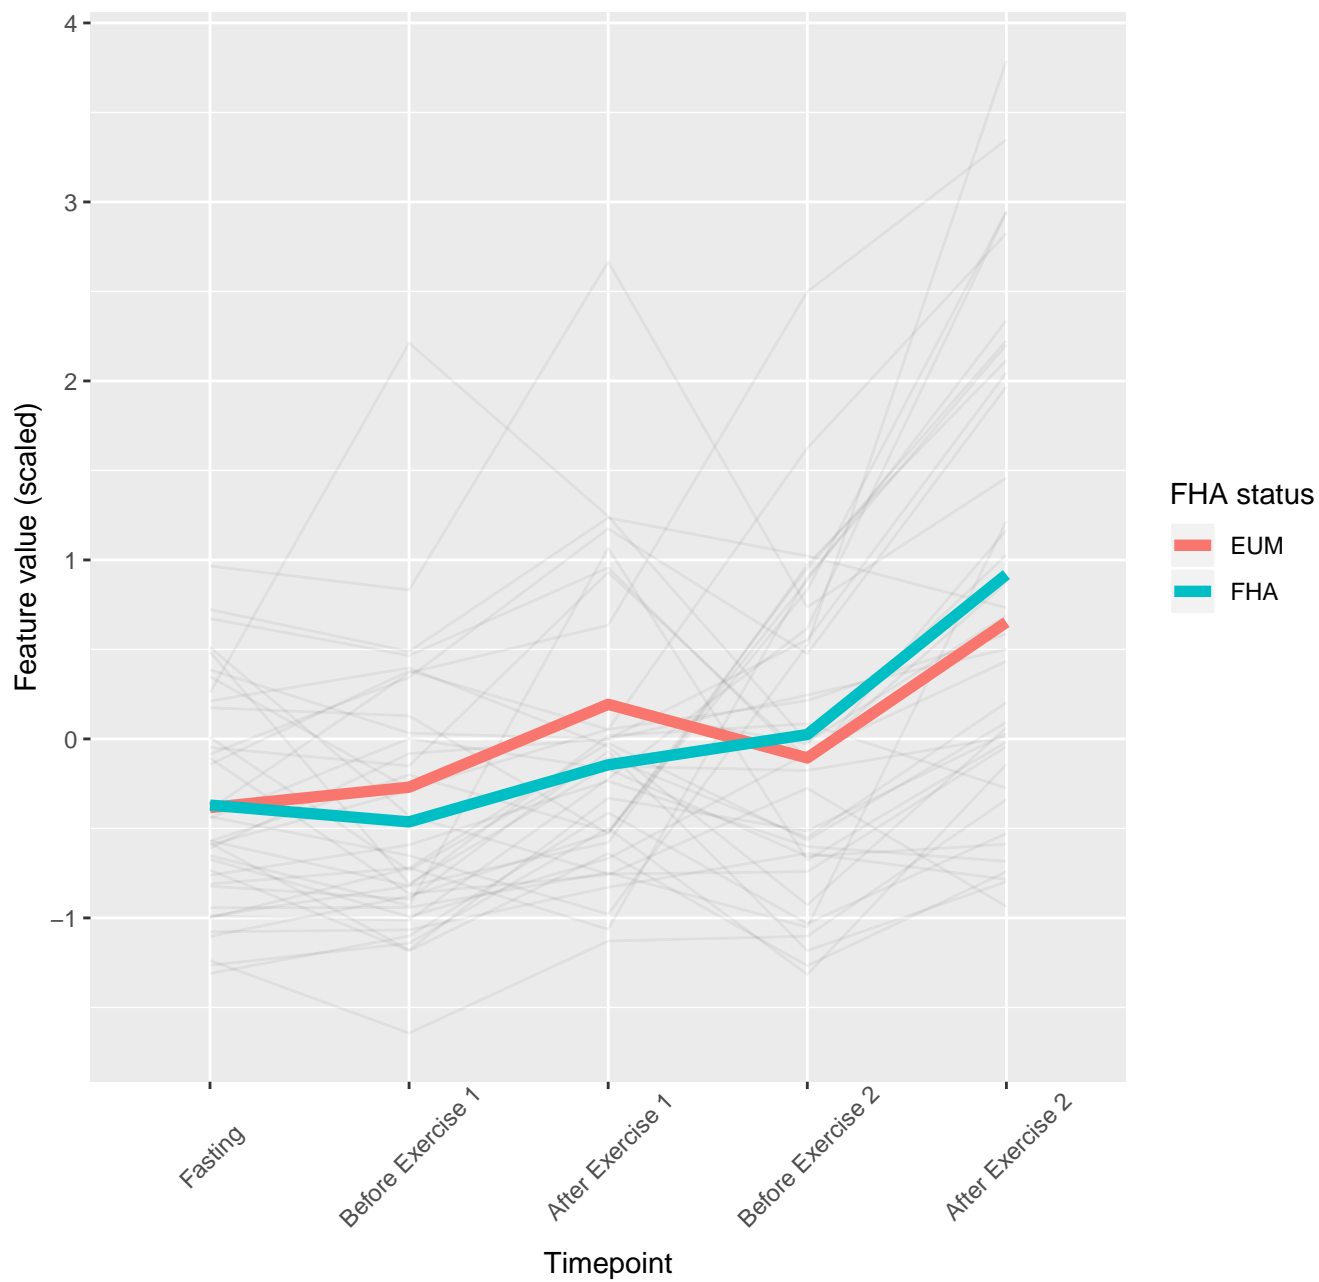

Line plot of TG(54:3)

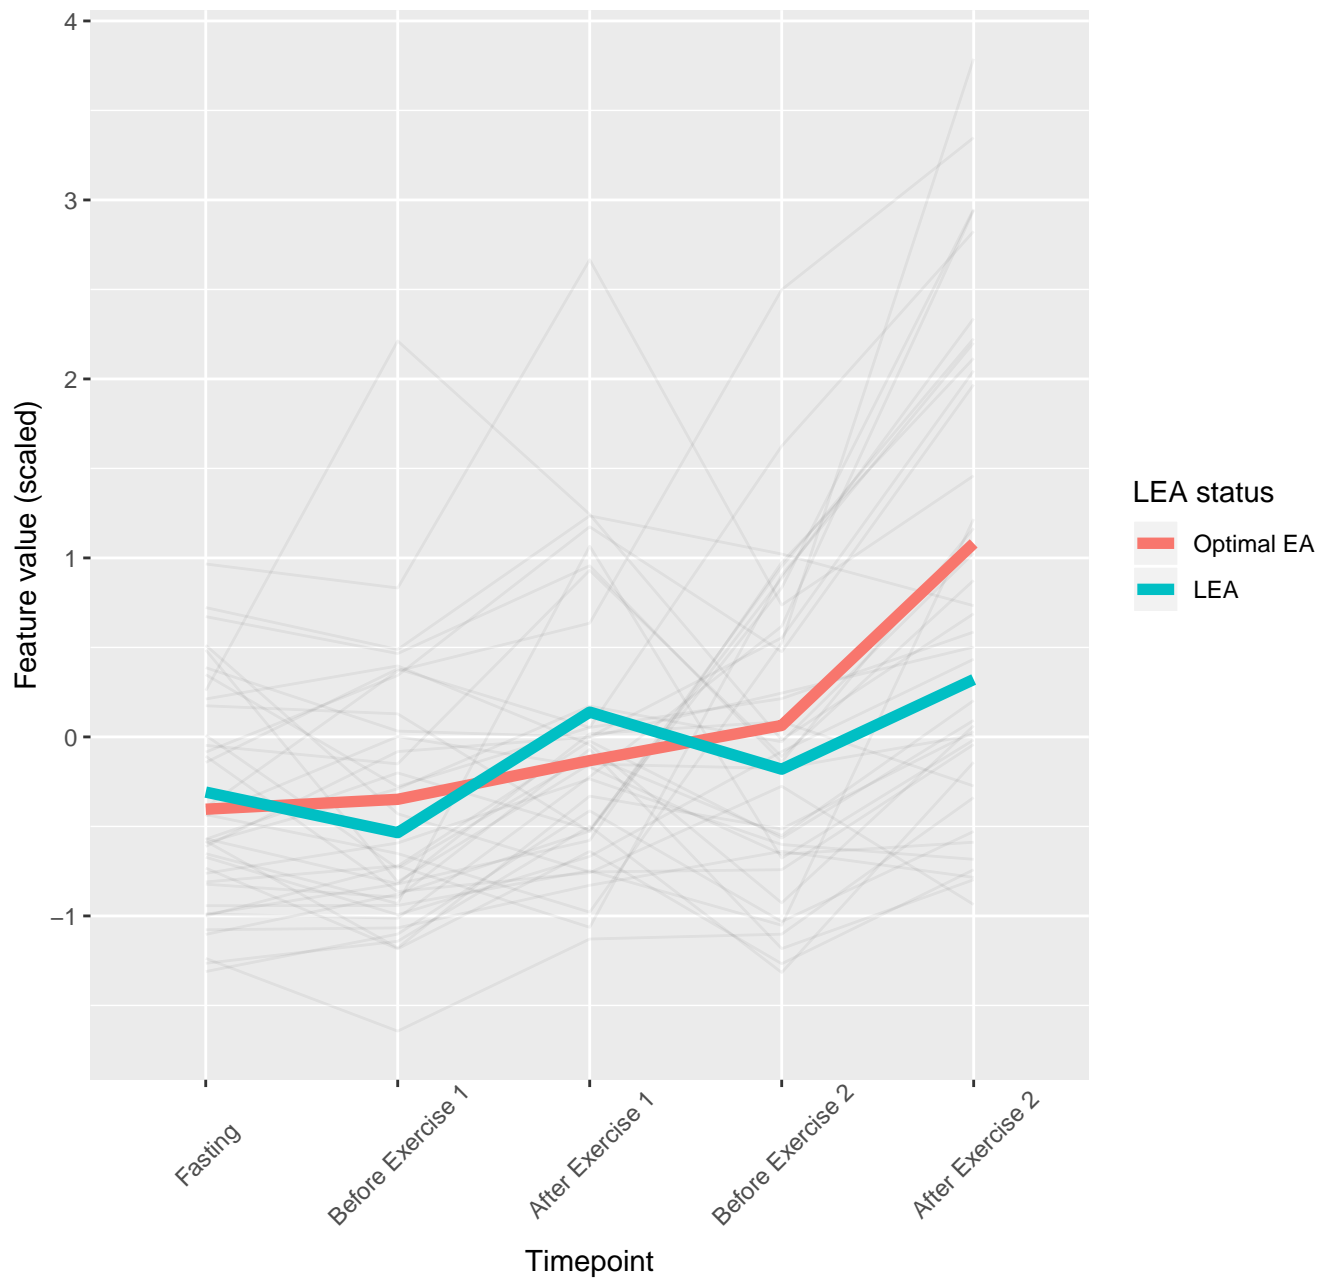

Line plot of TG(54:4)

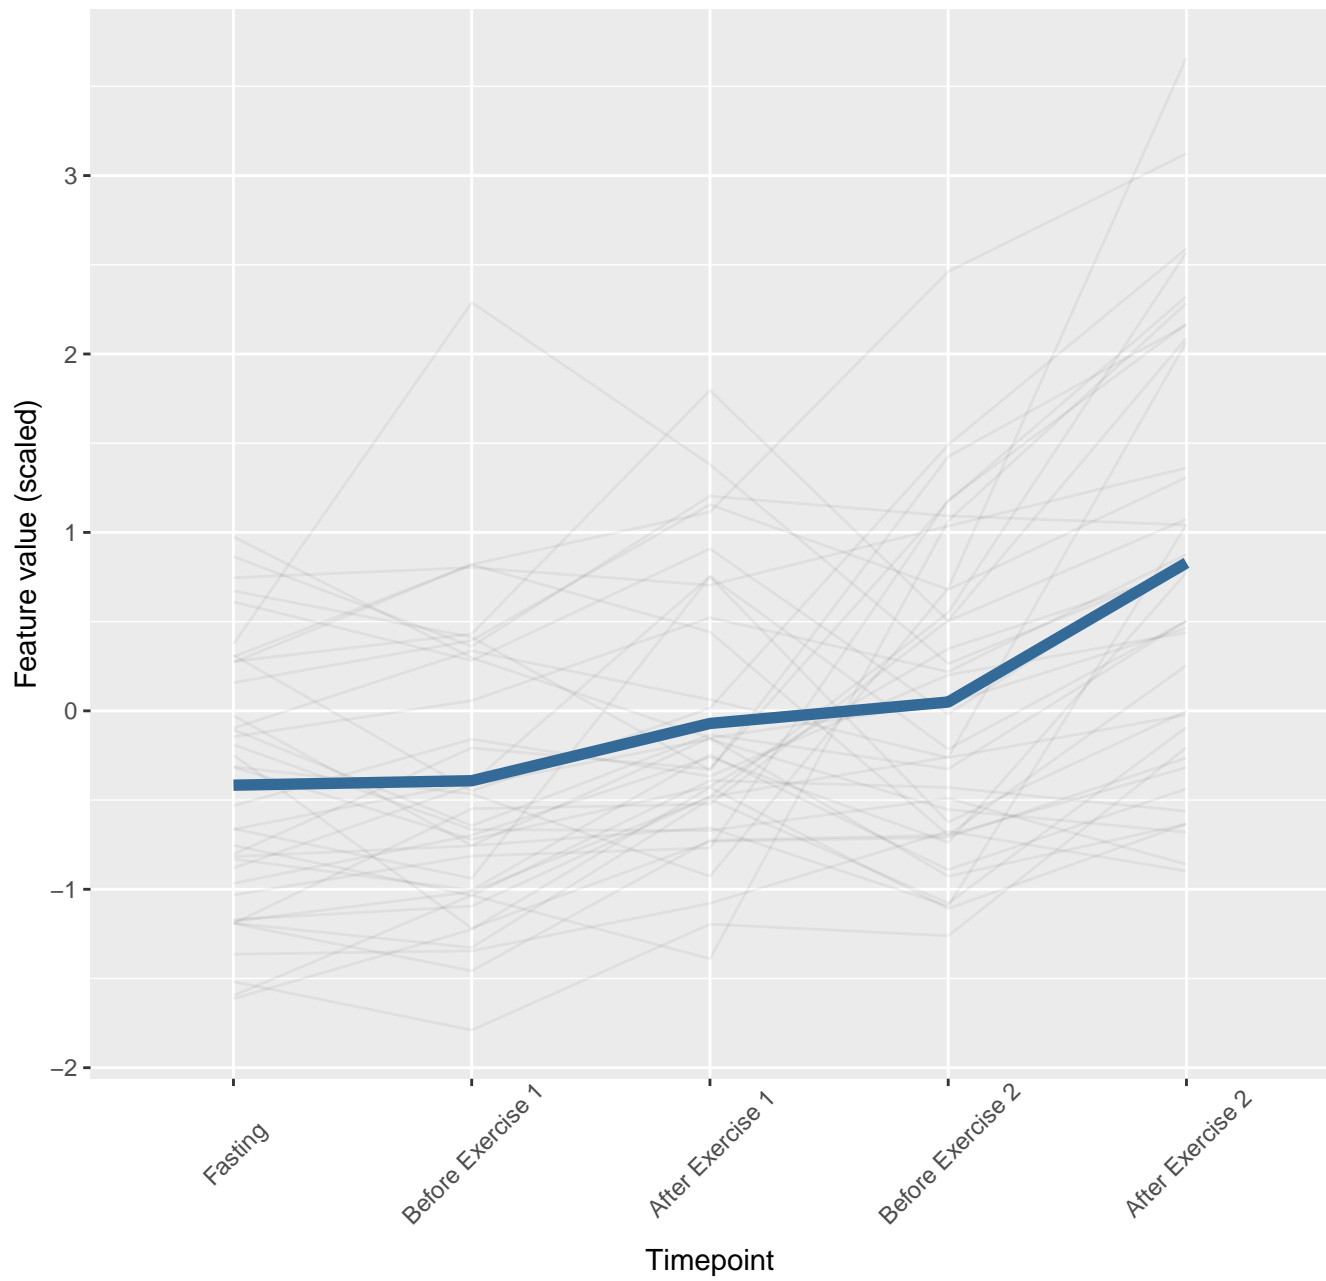



Line plot of TG(54:4)

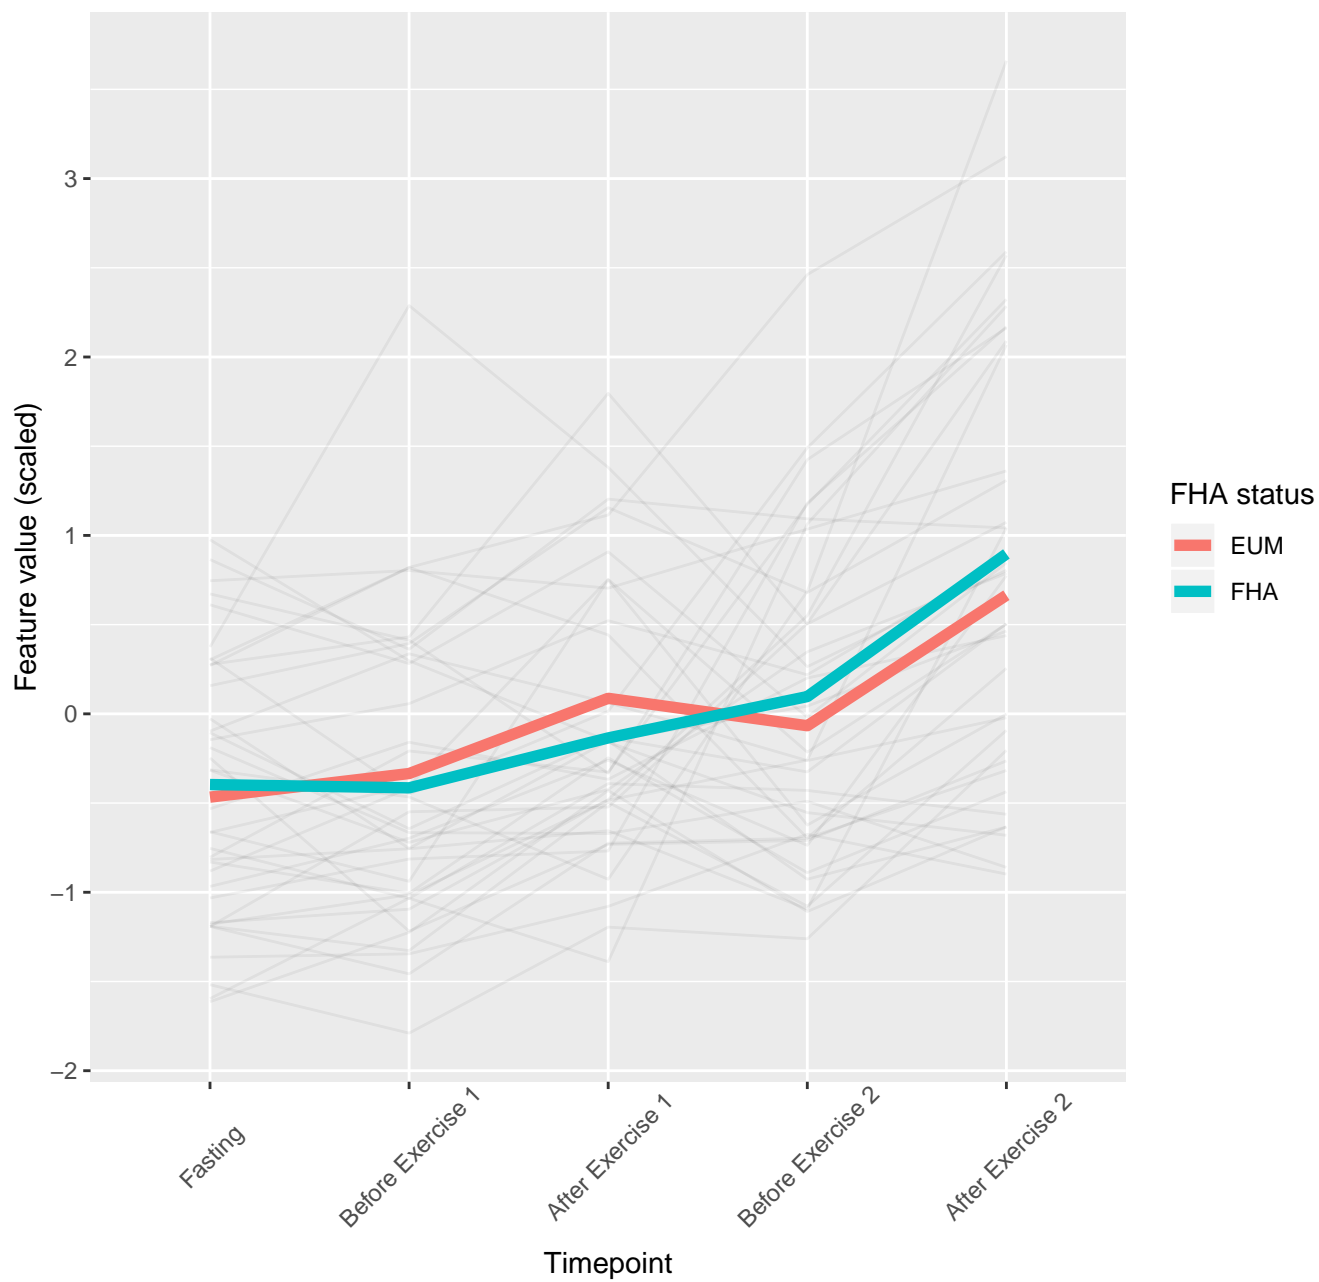

Line plot of TG(54:4)

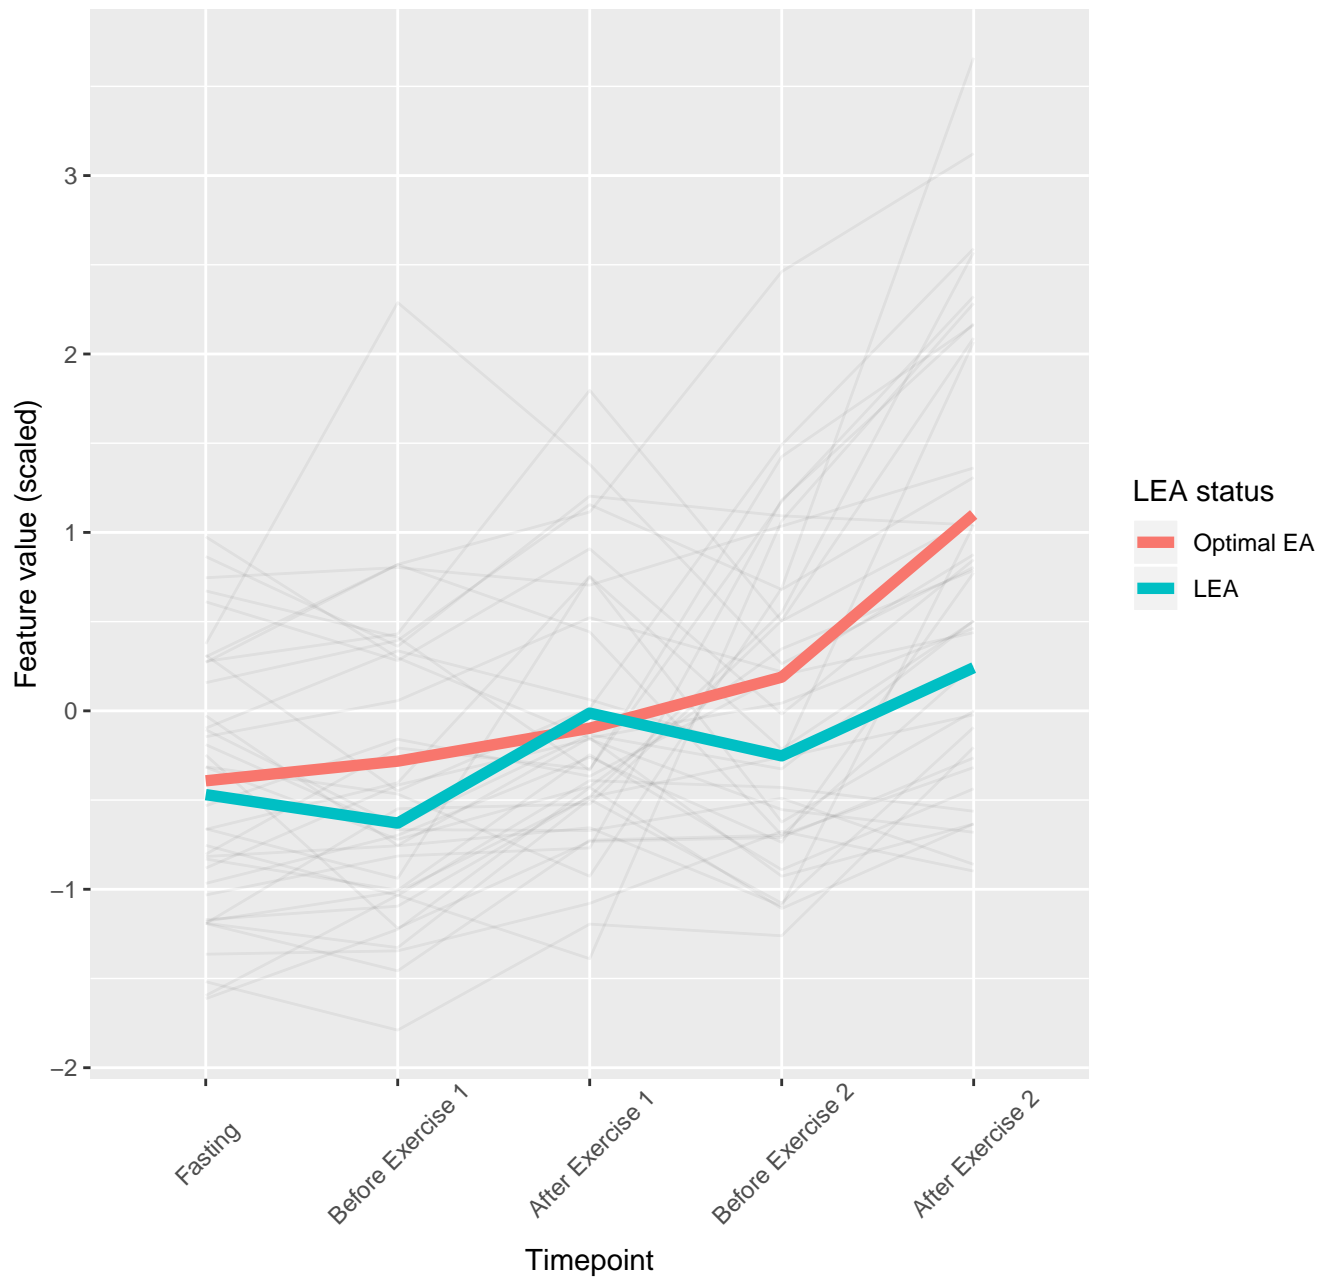

Line plot of TG(54:5)

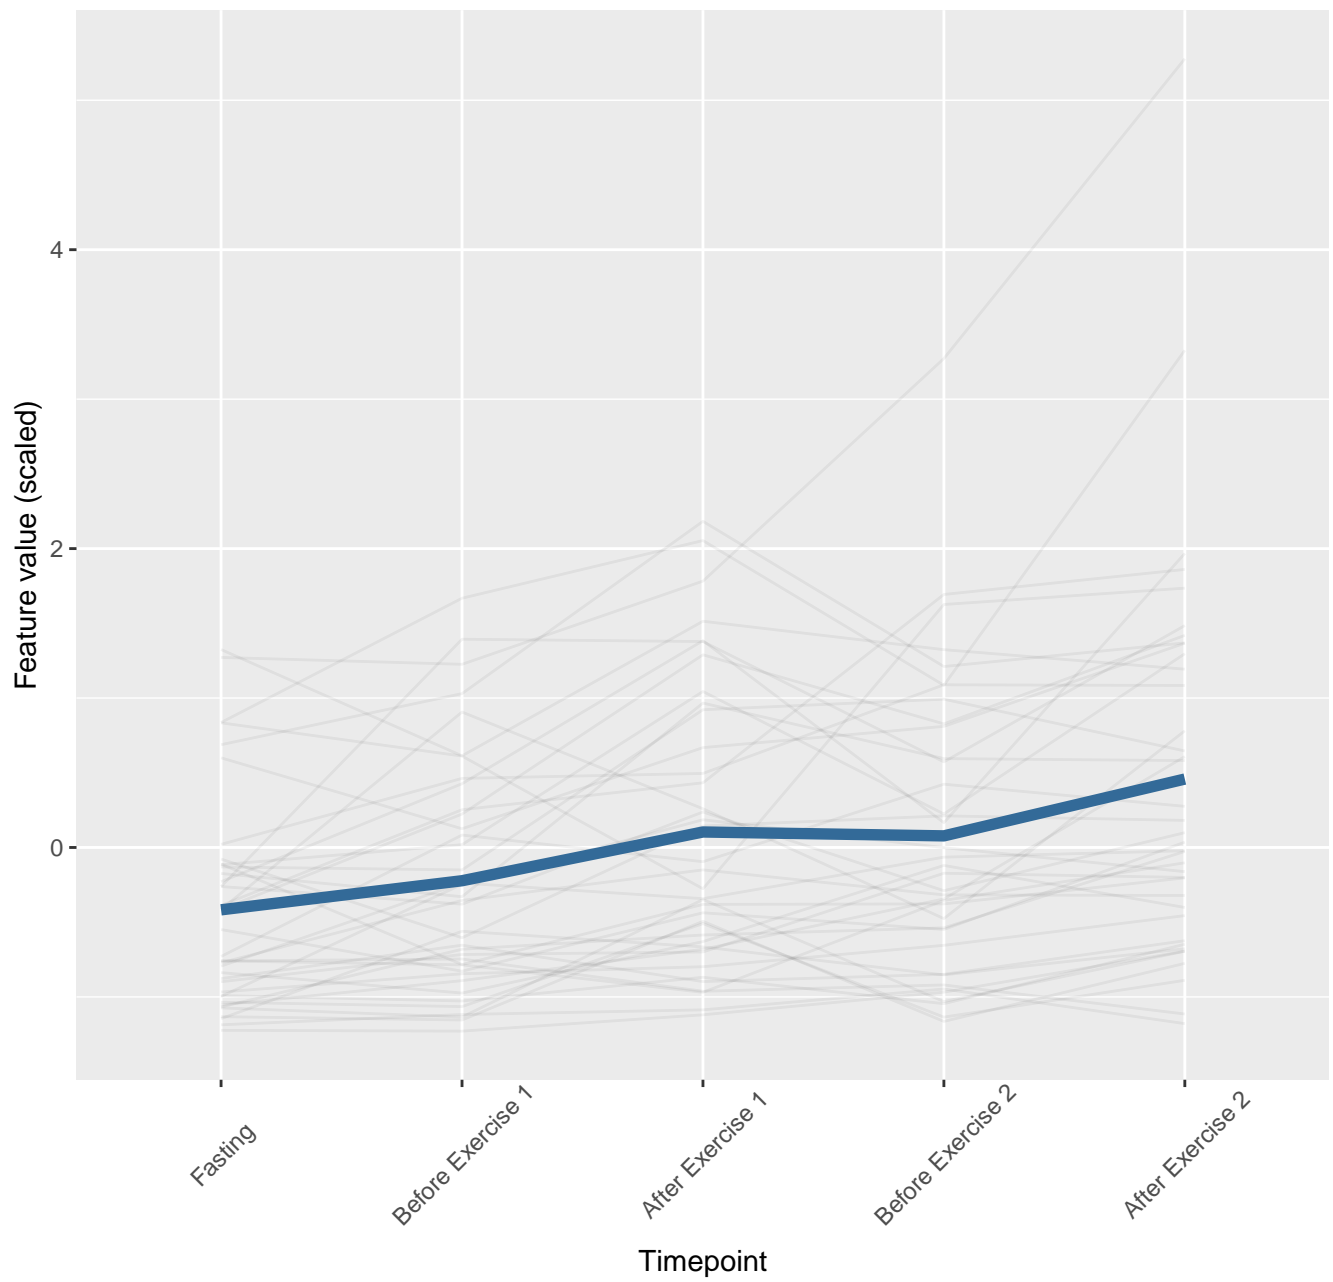

Line plot of TG(54:5)

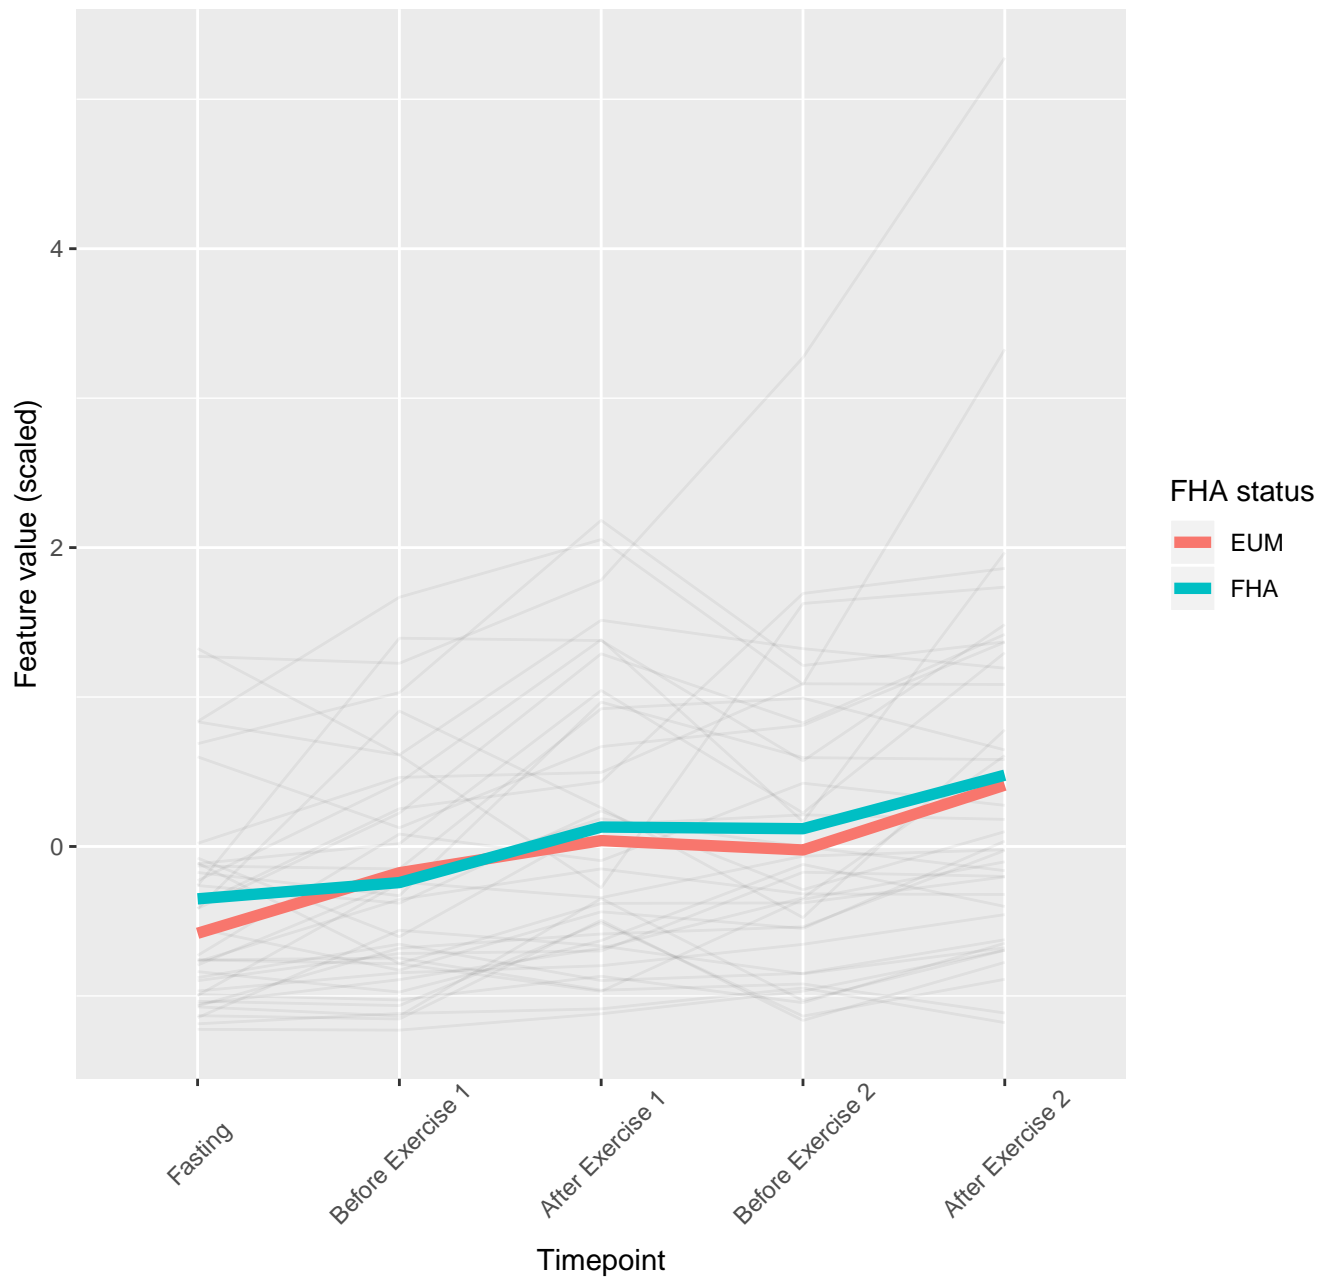

Line plot of TG(54:5)

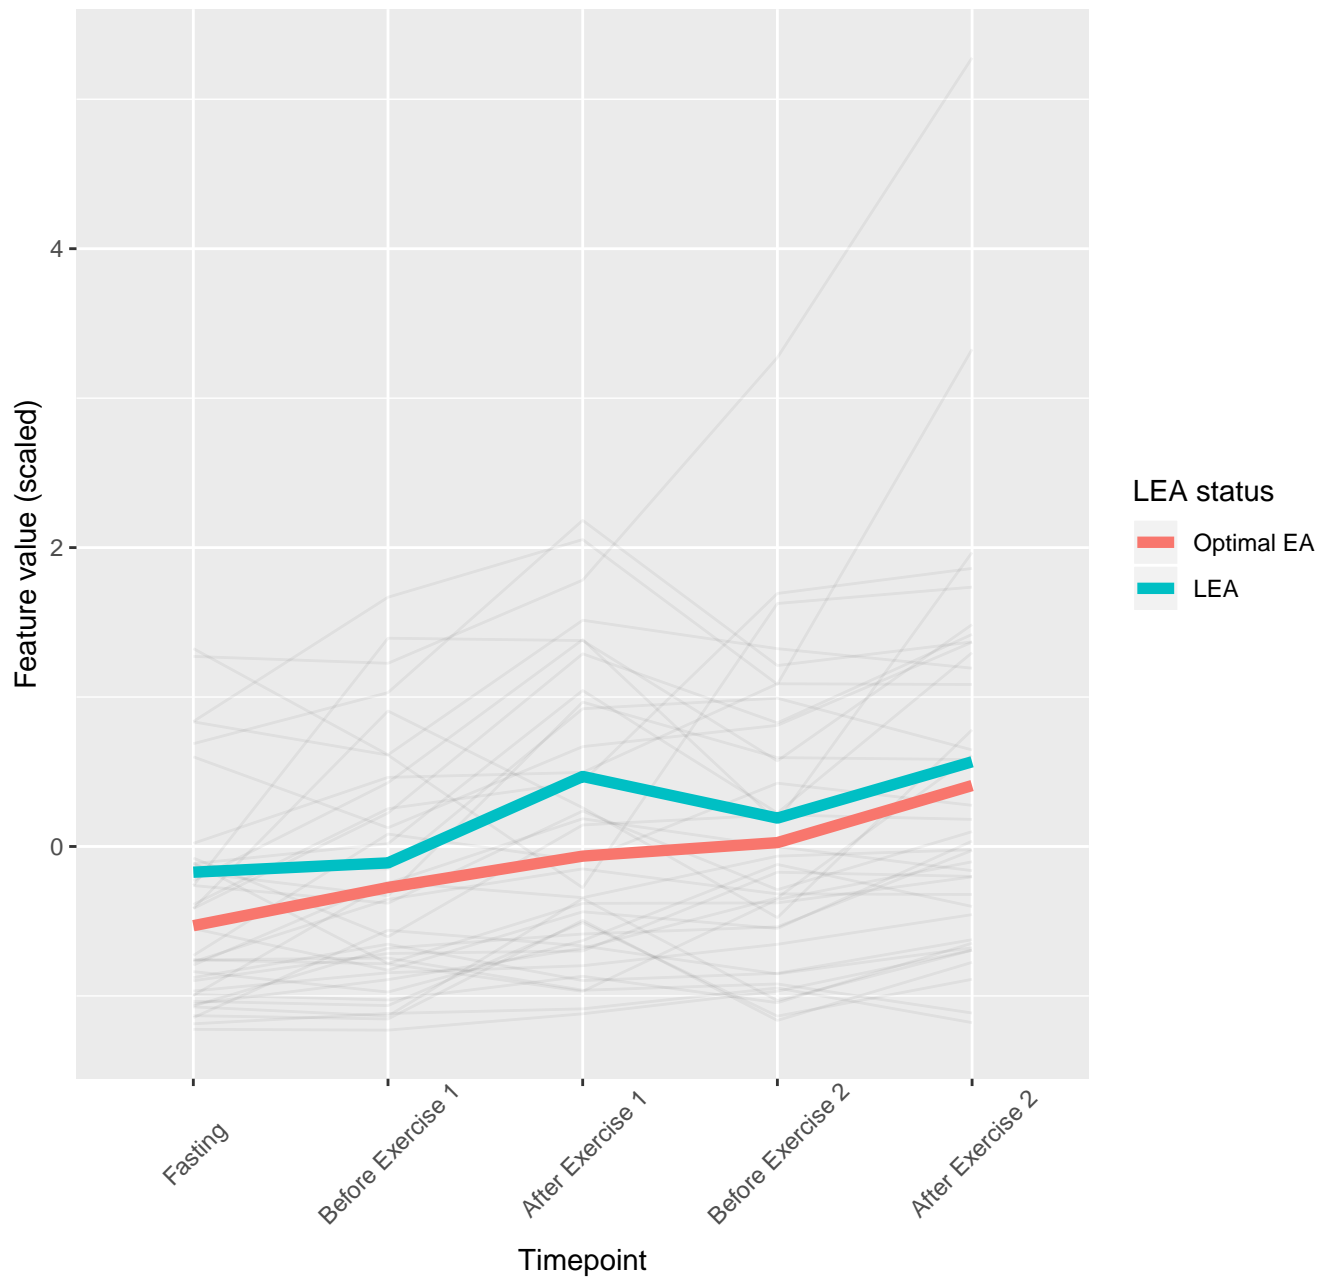

Line plot of TG(54:6)

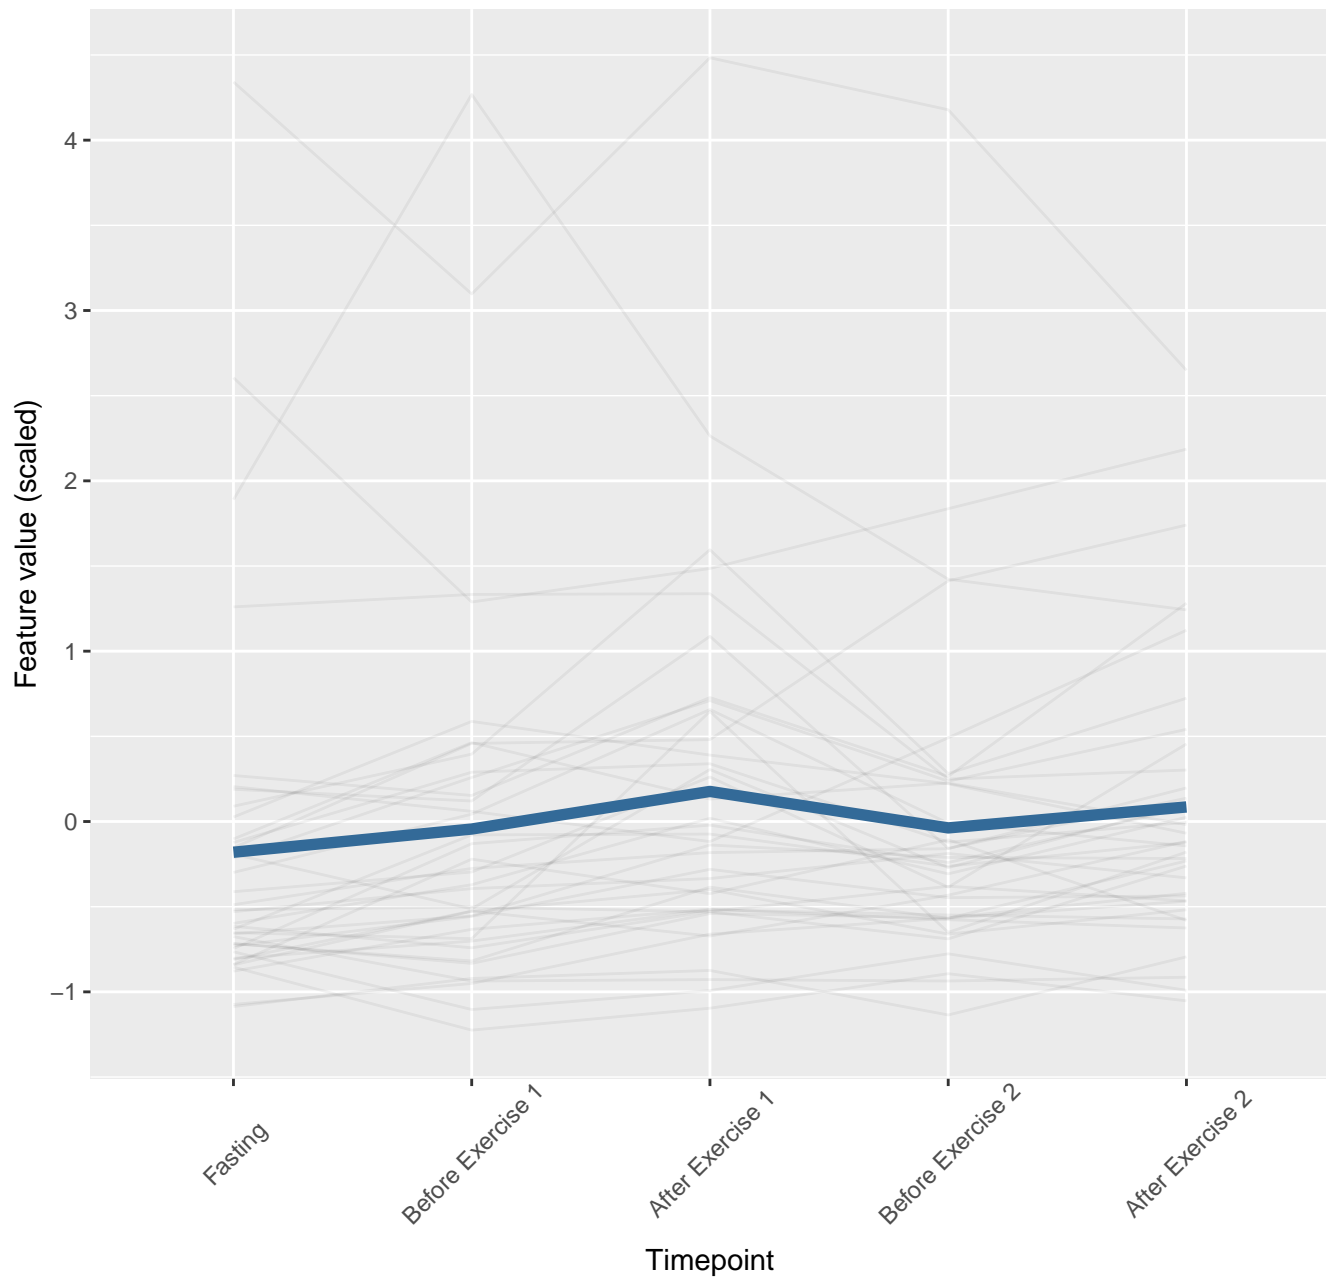

Line plot of TG(54:6)

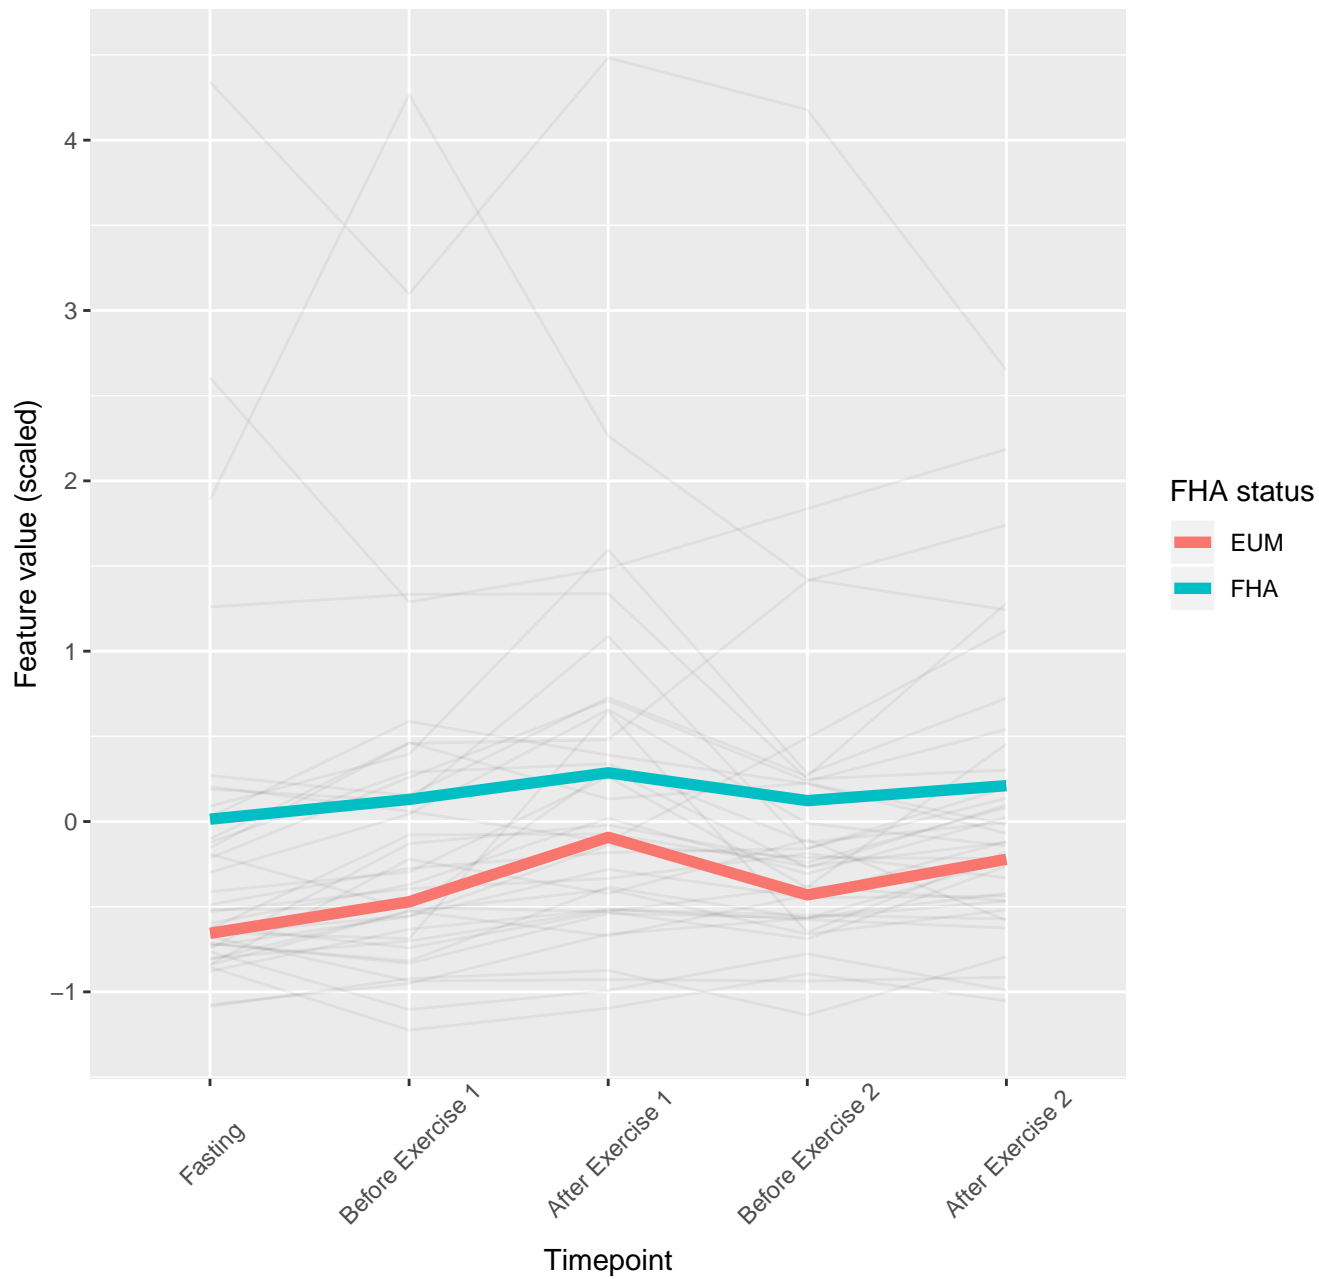

Line plot of TG(54:6)

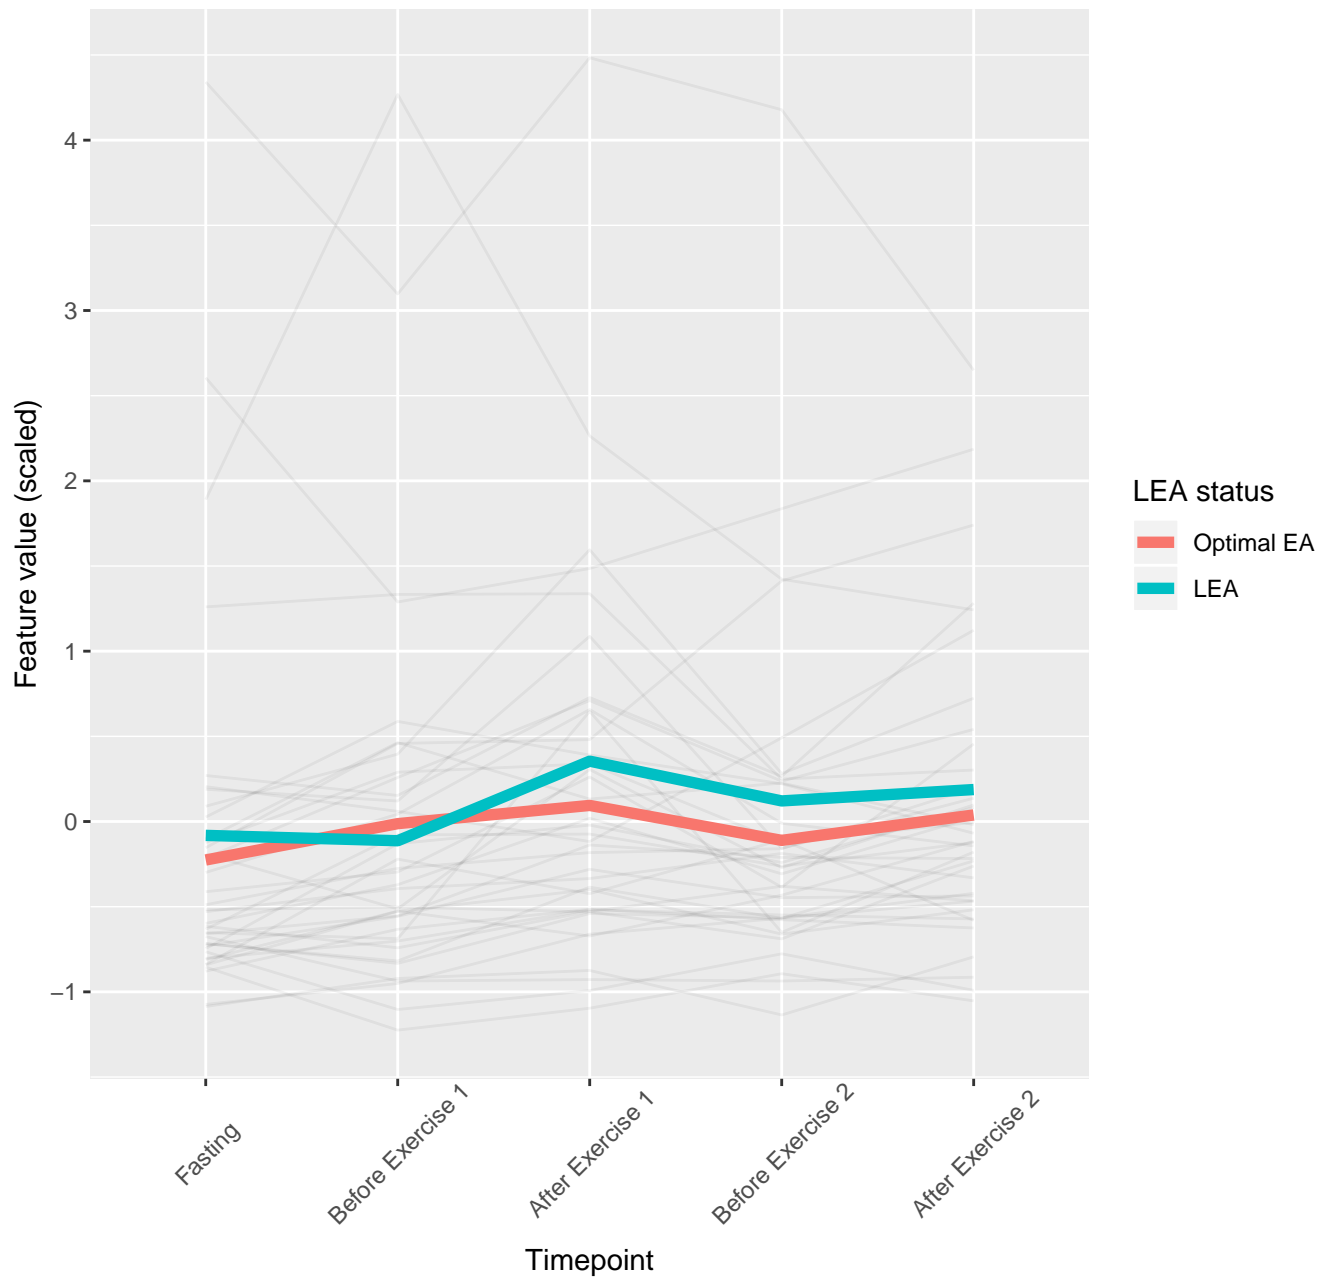



Line plot of TG(54:7)

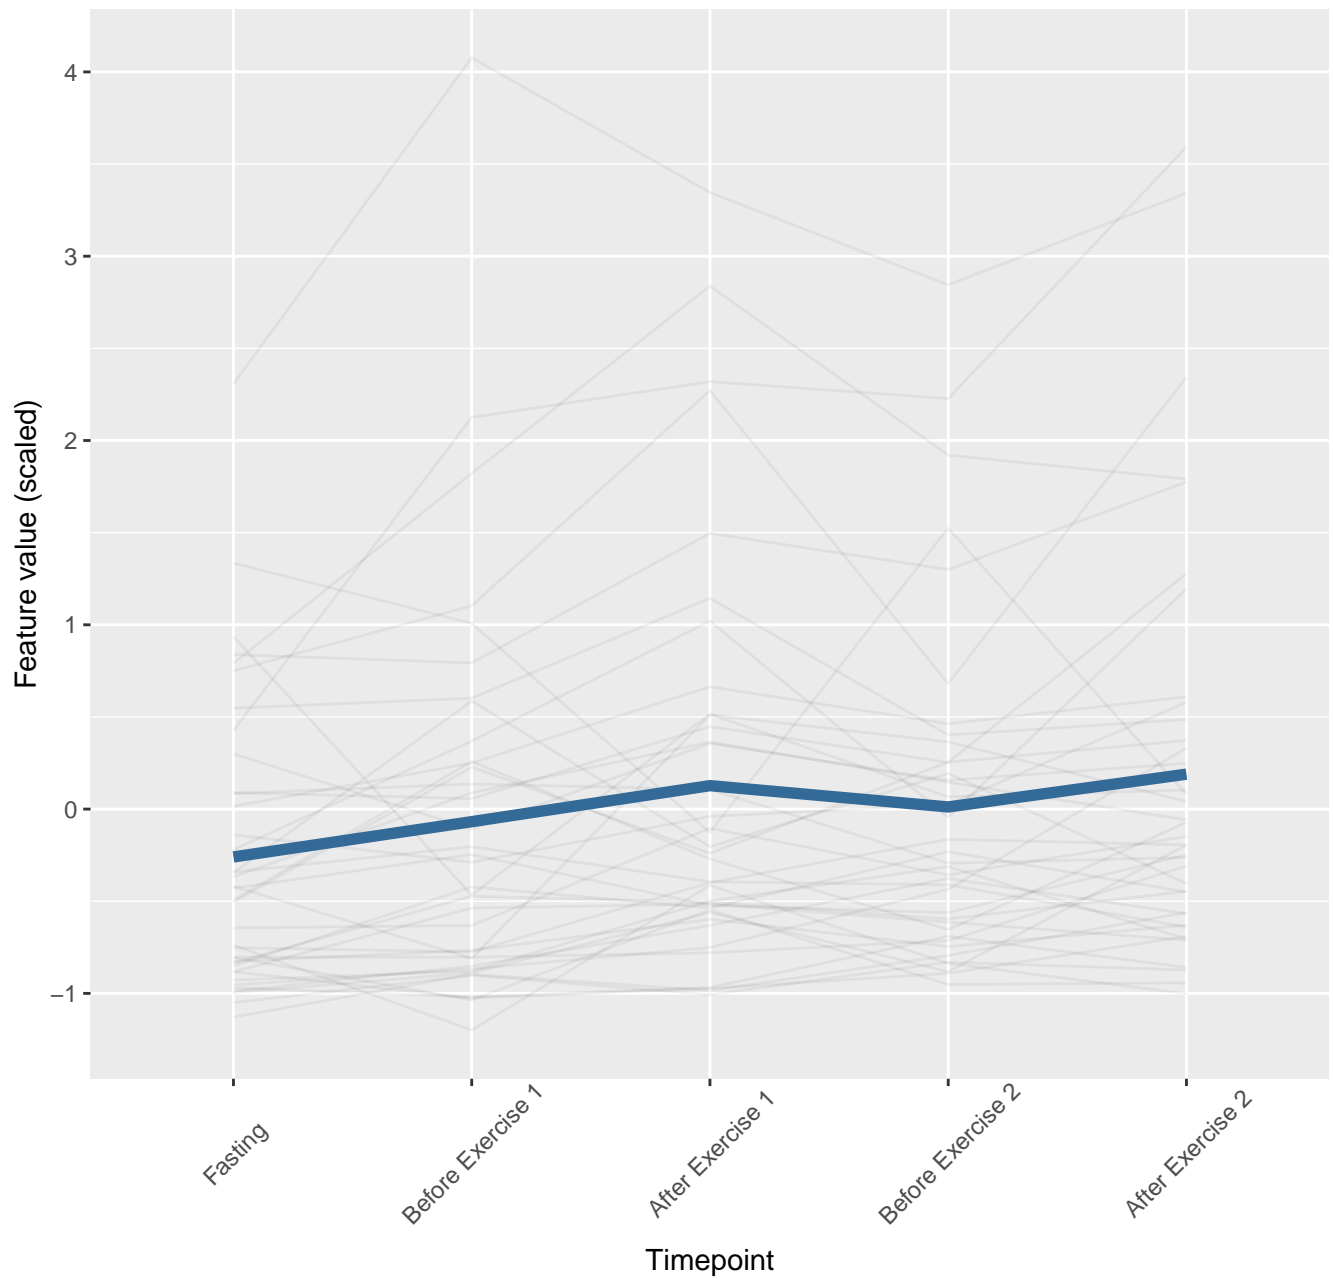

Line plot of TG(54:7)

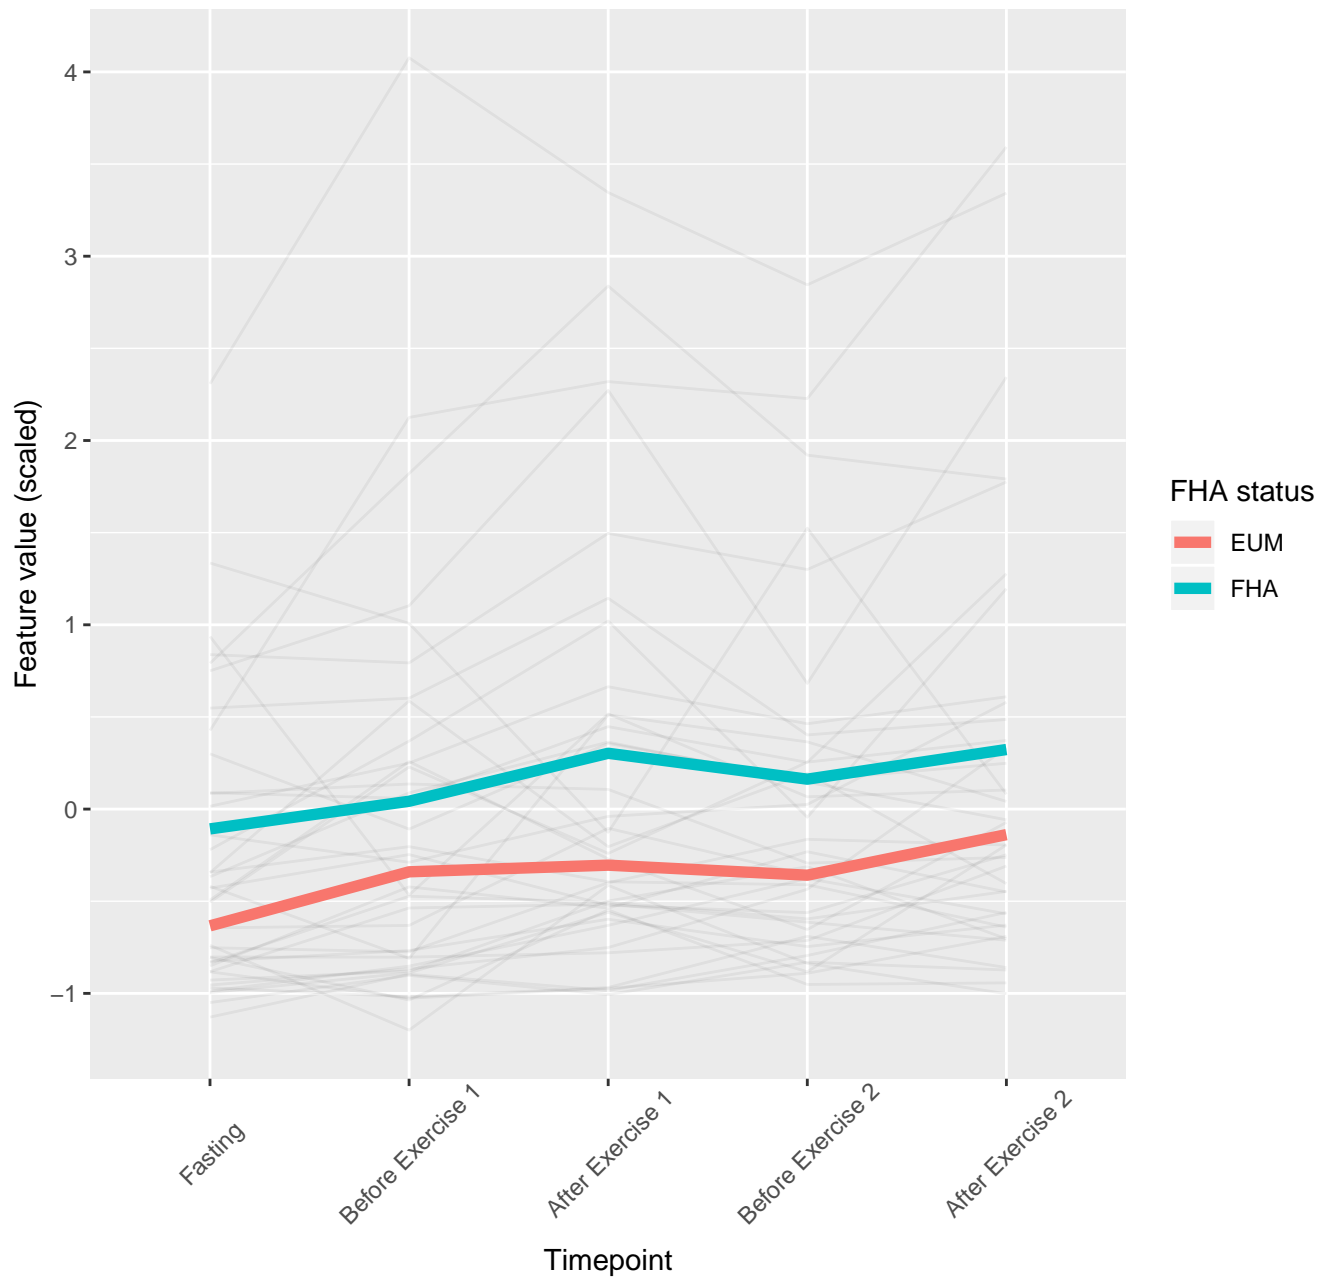

Line plot of TG(54:7)

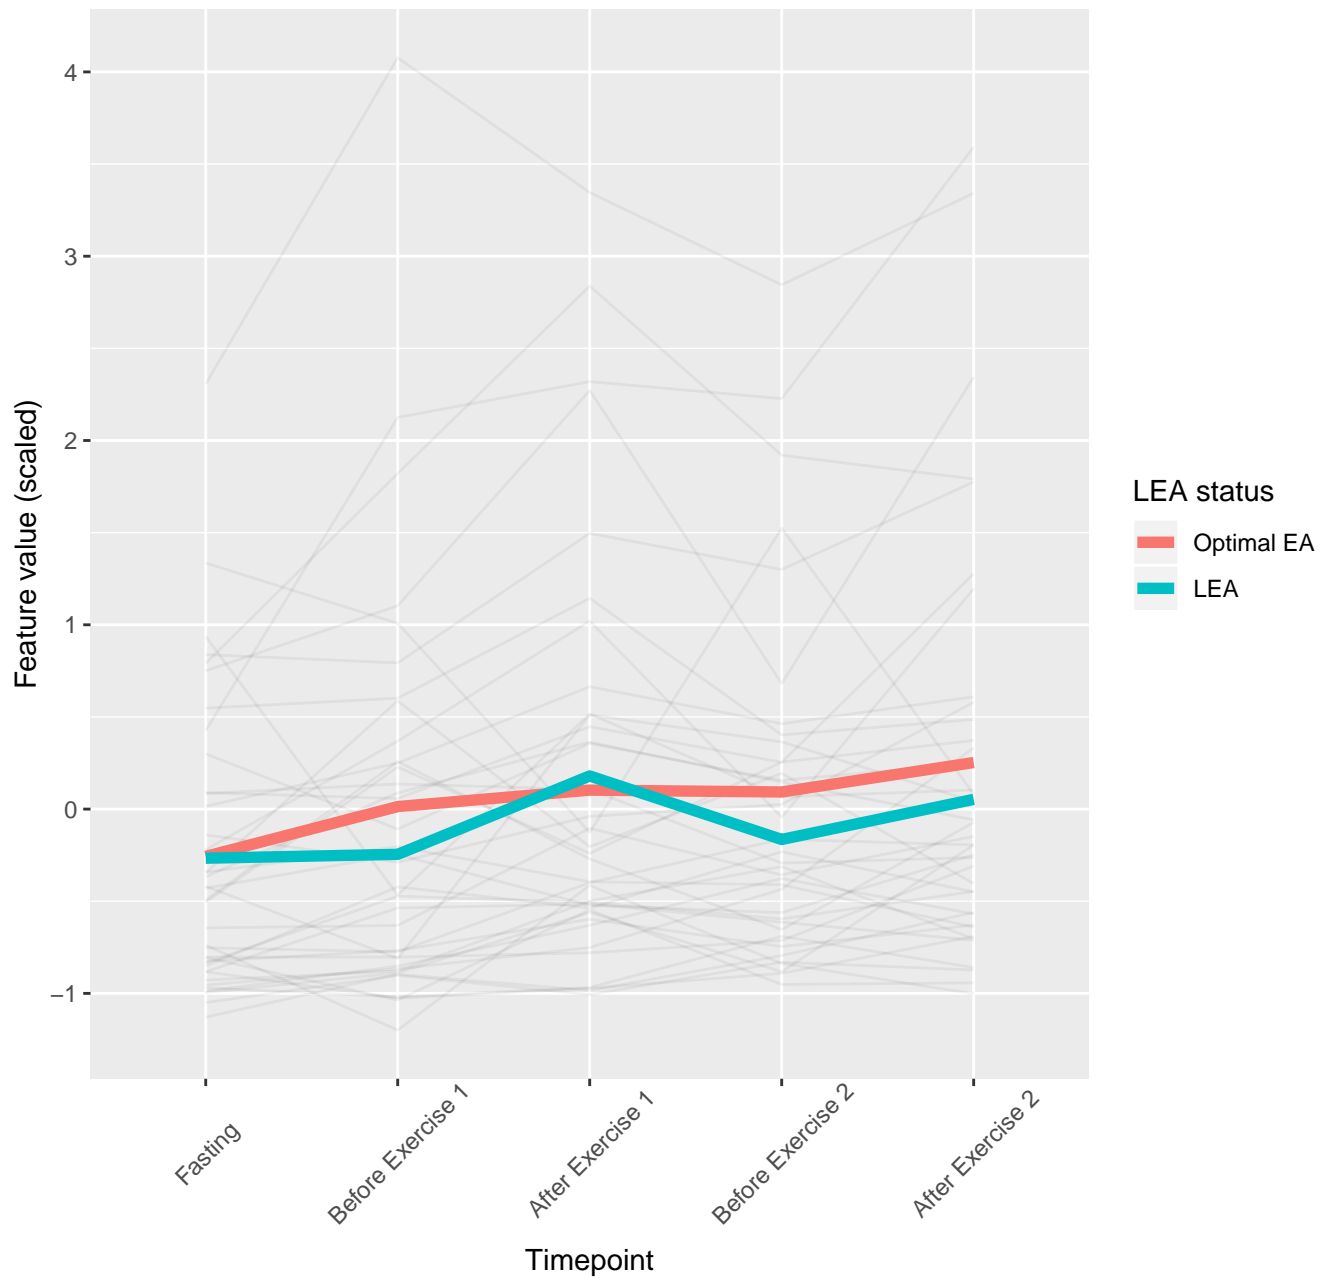

Line plot of TG(54:8)

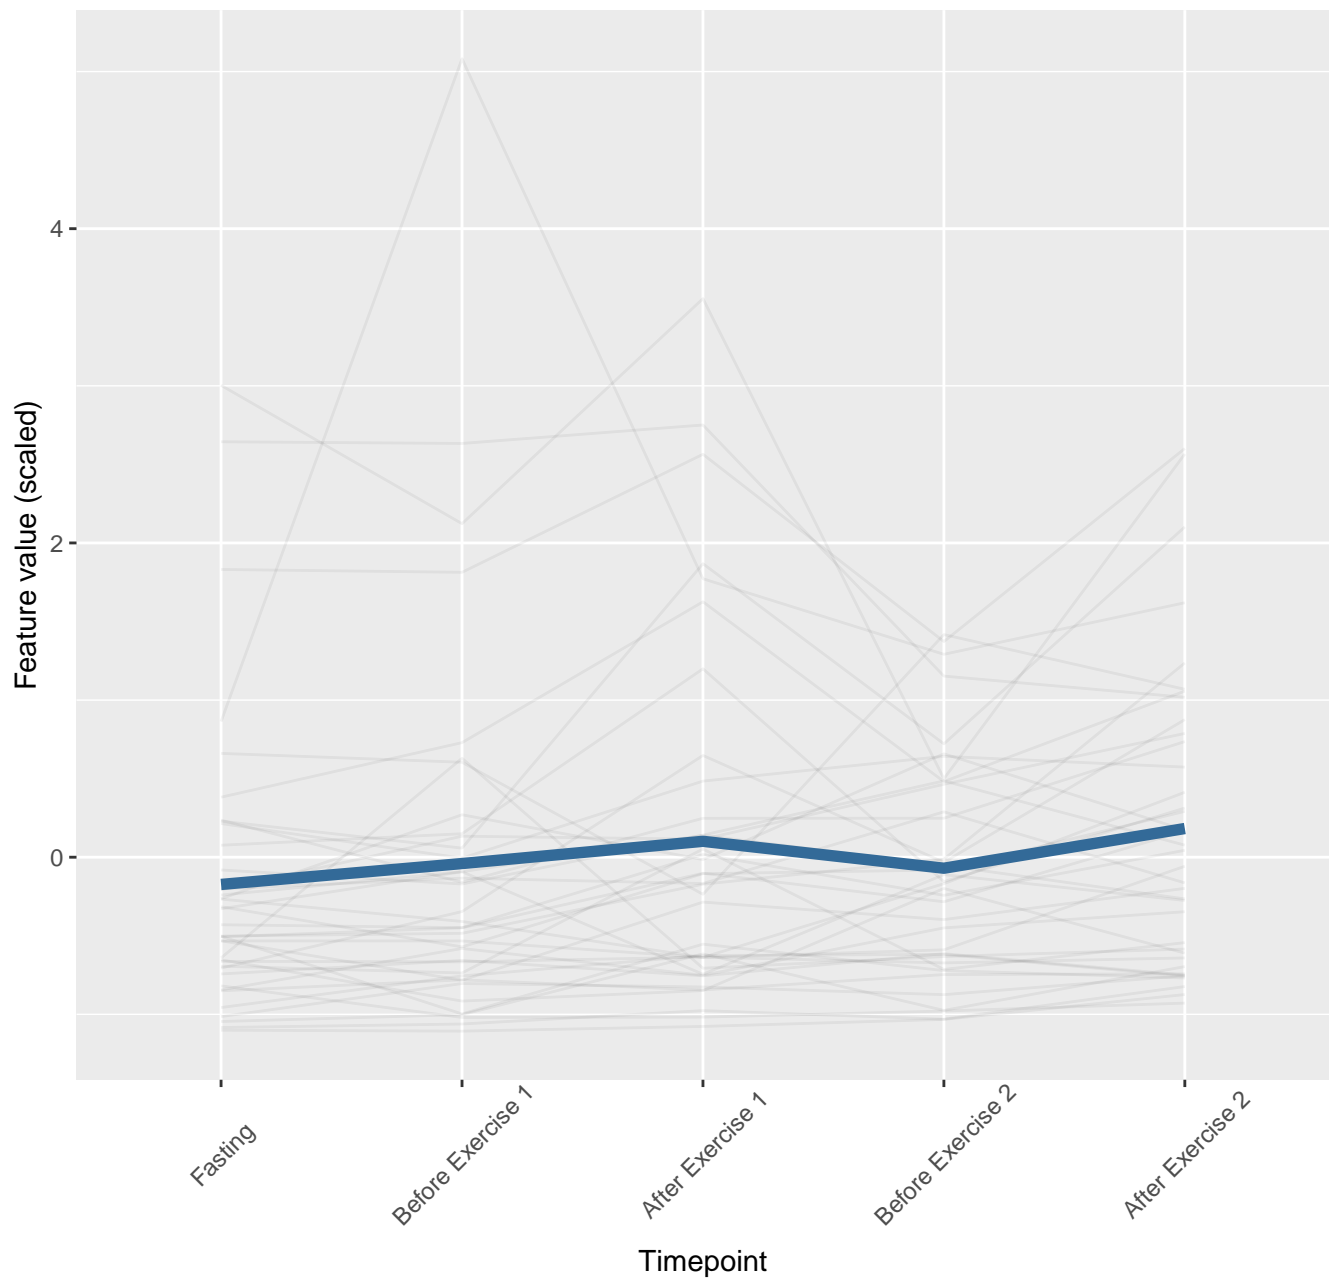

Line plot of TG(54:8)

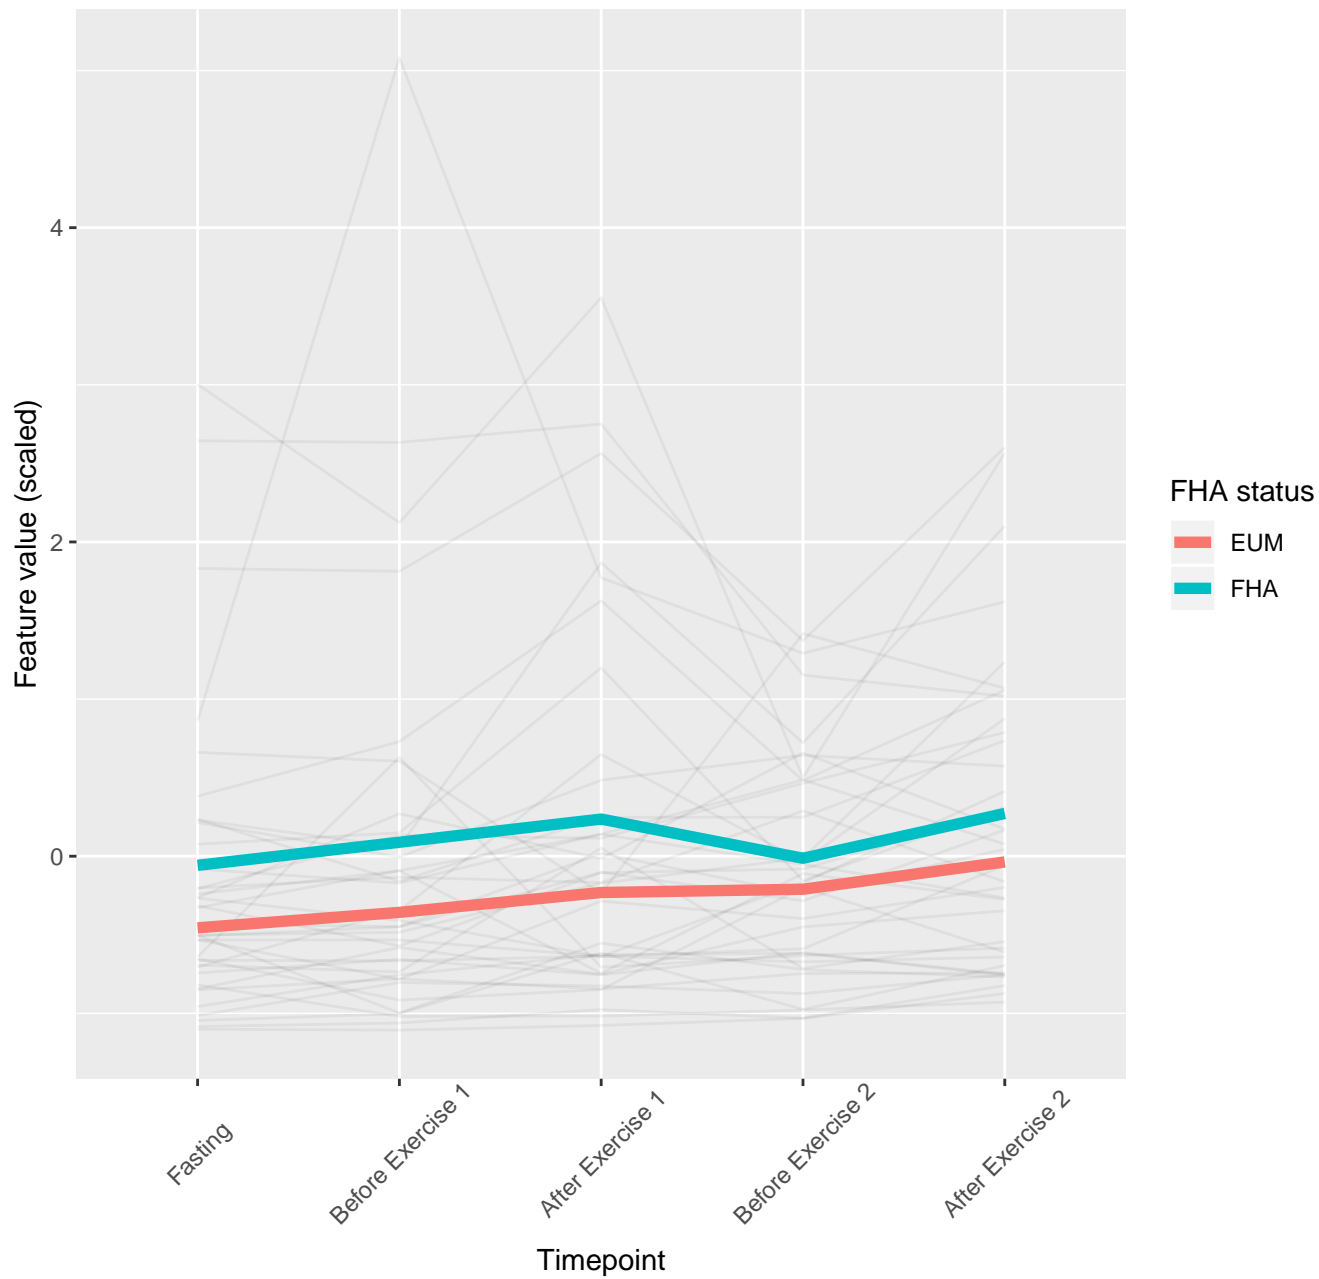

Line plot of TG(54:8)

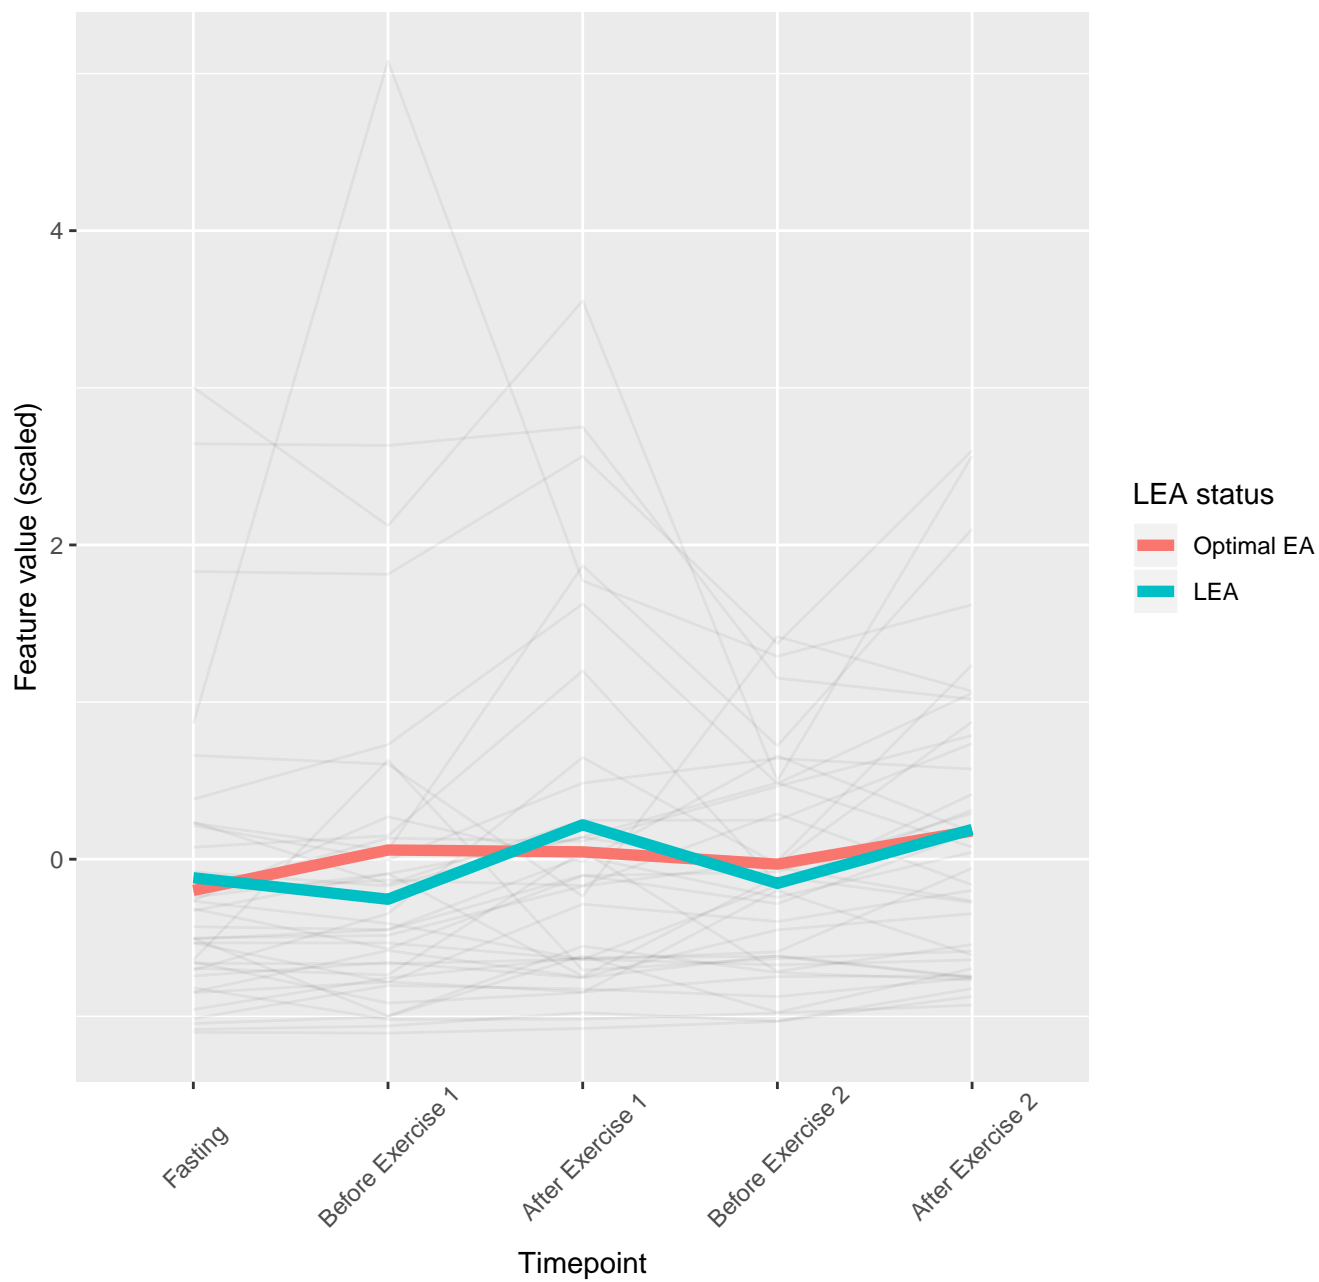

Line plot of TG(55:2)

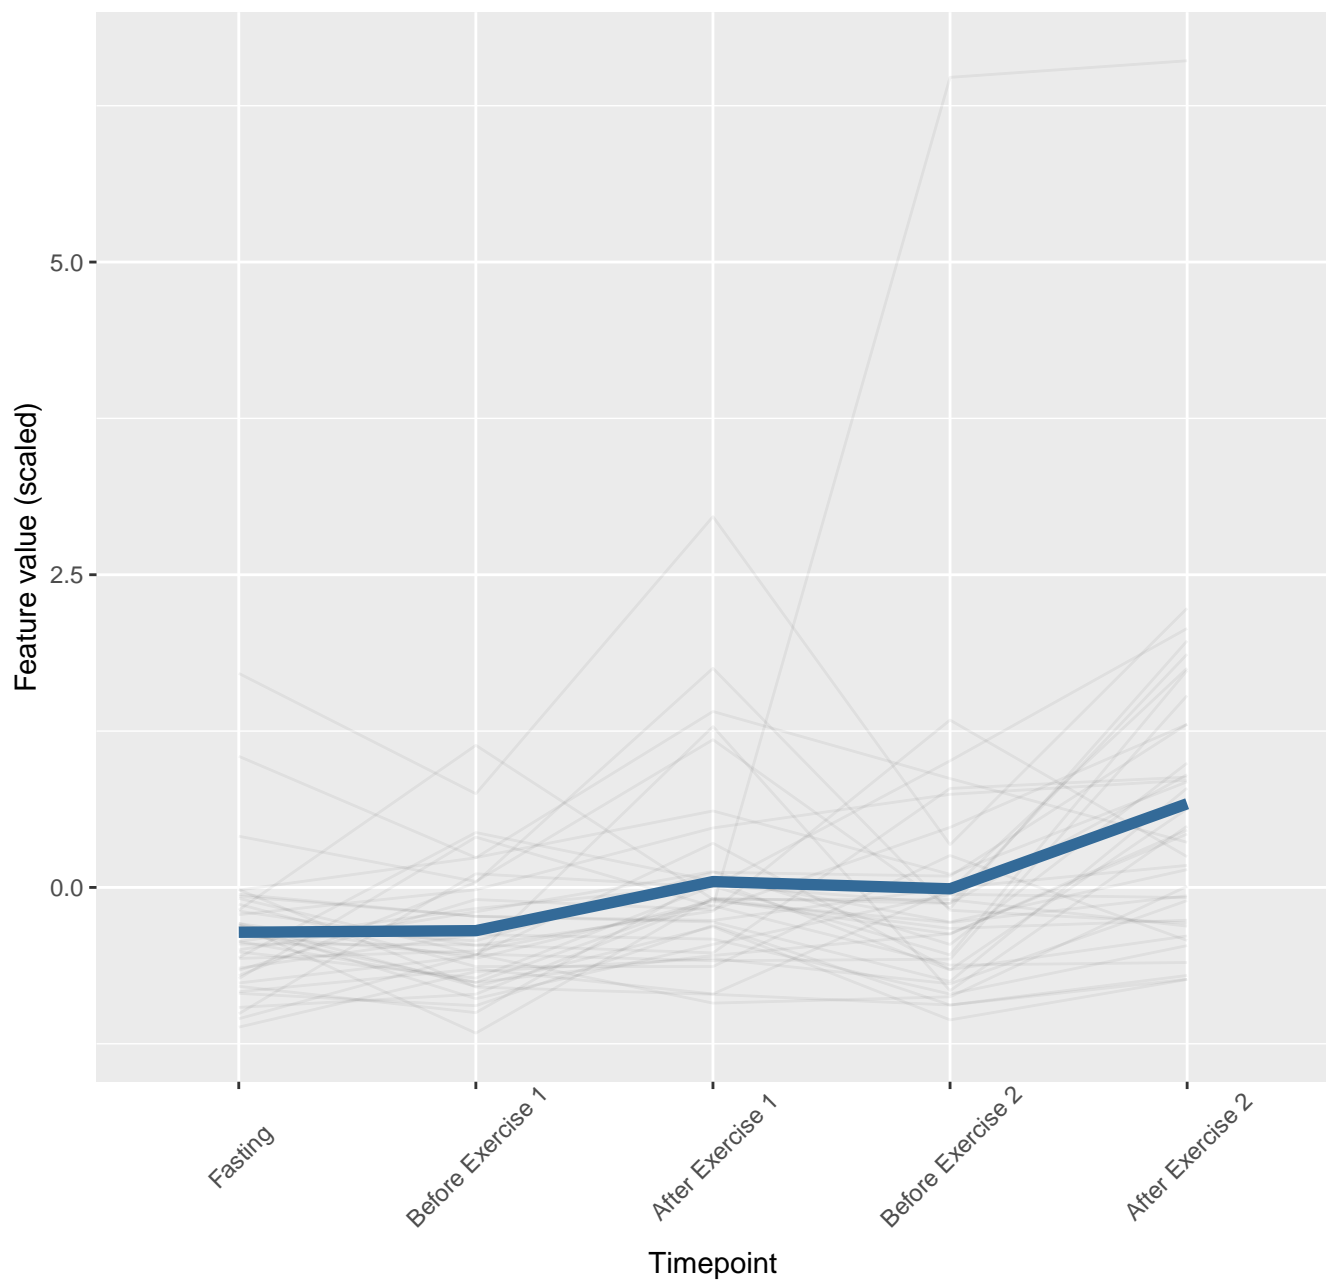

Line plot of TG(55:2)

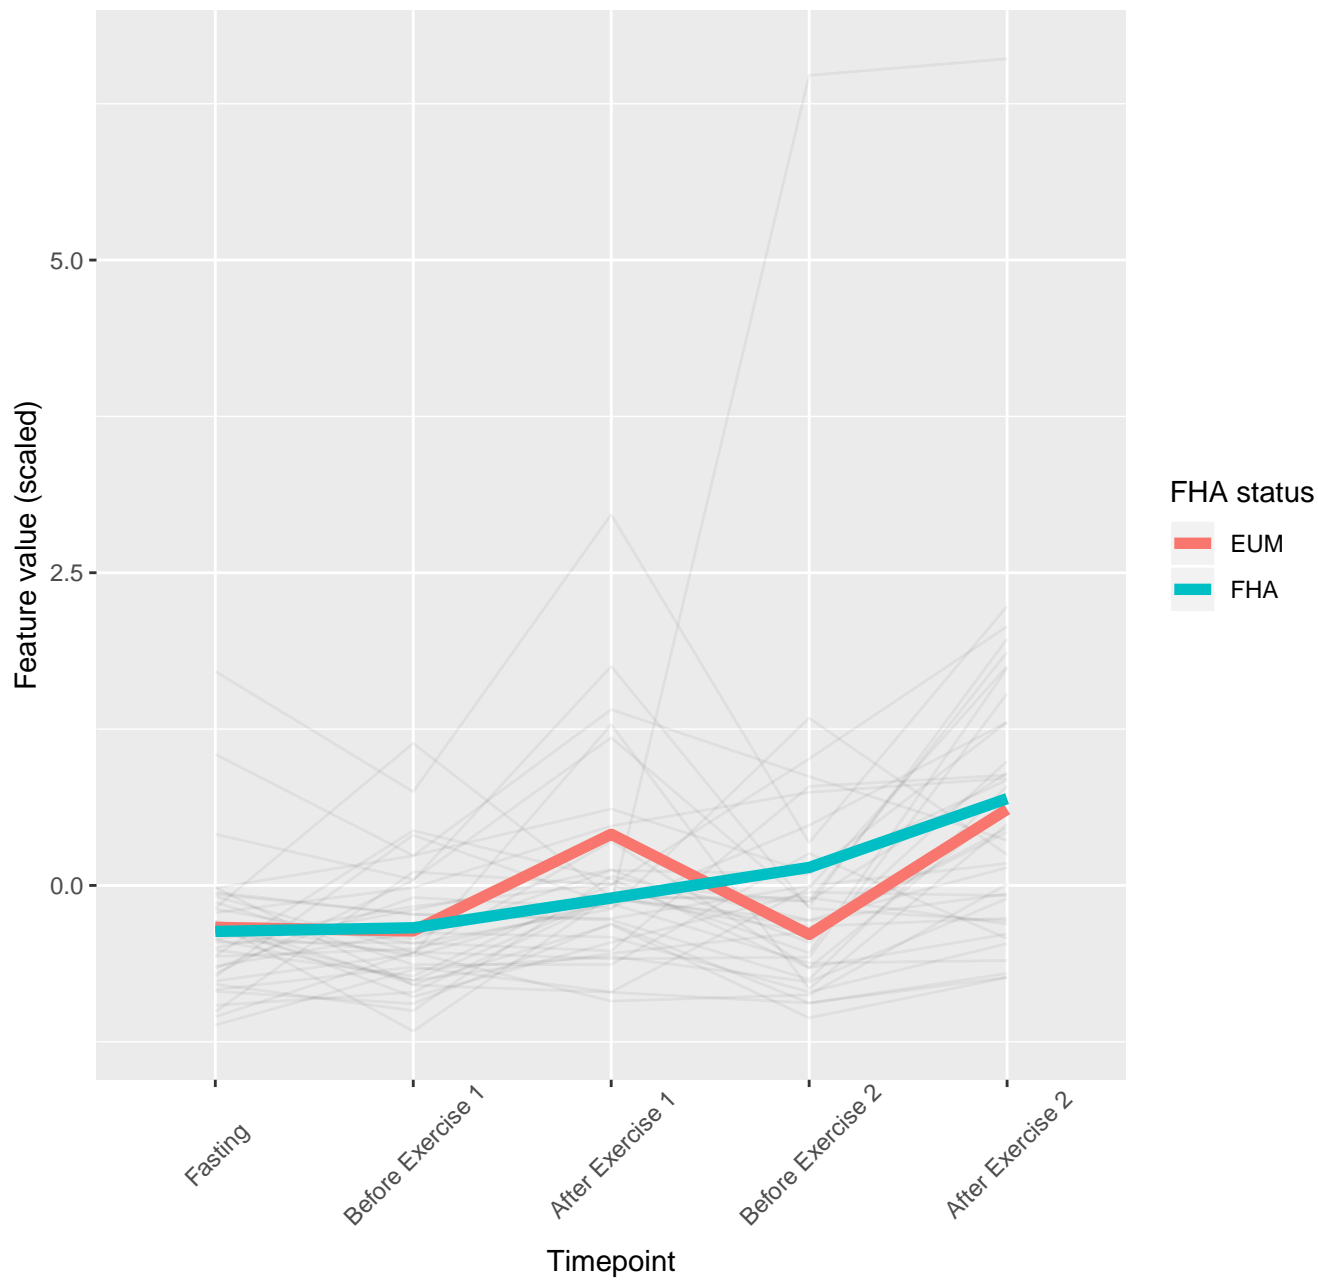



Line plot of TG(55:2)

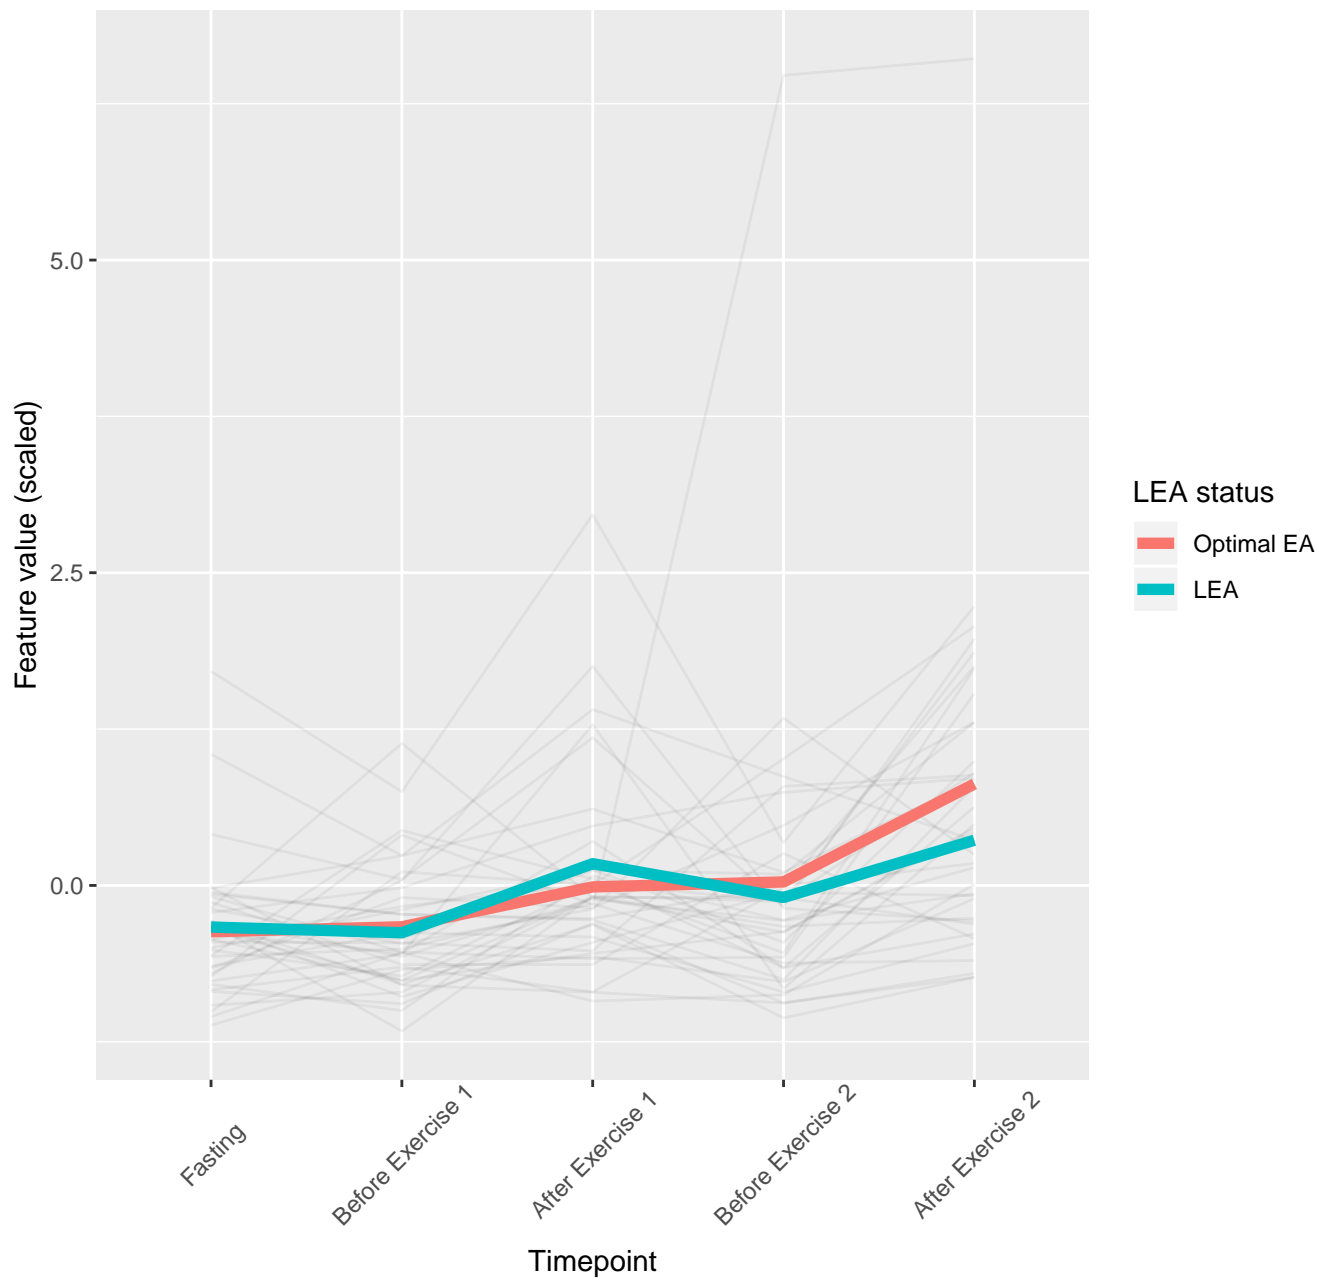

Line plot of TG(55:3)

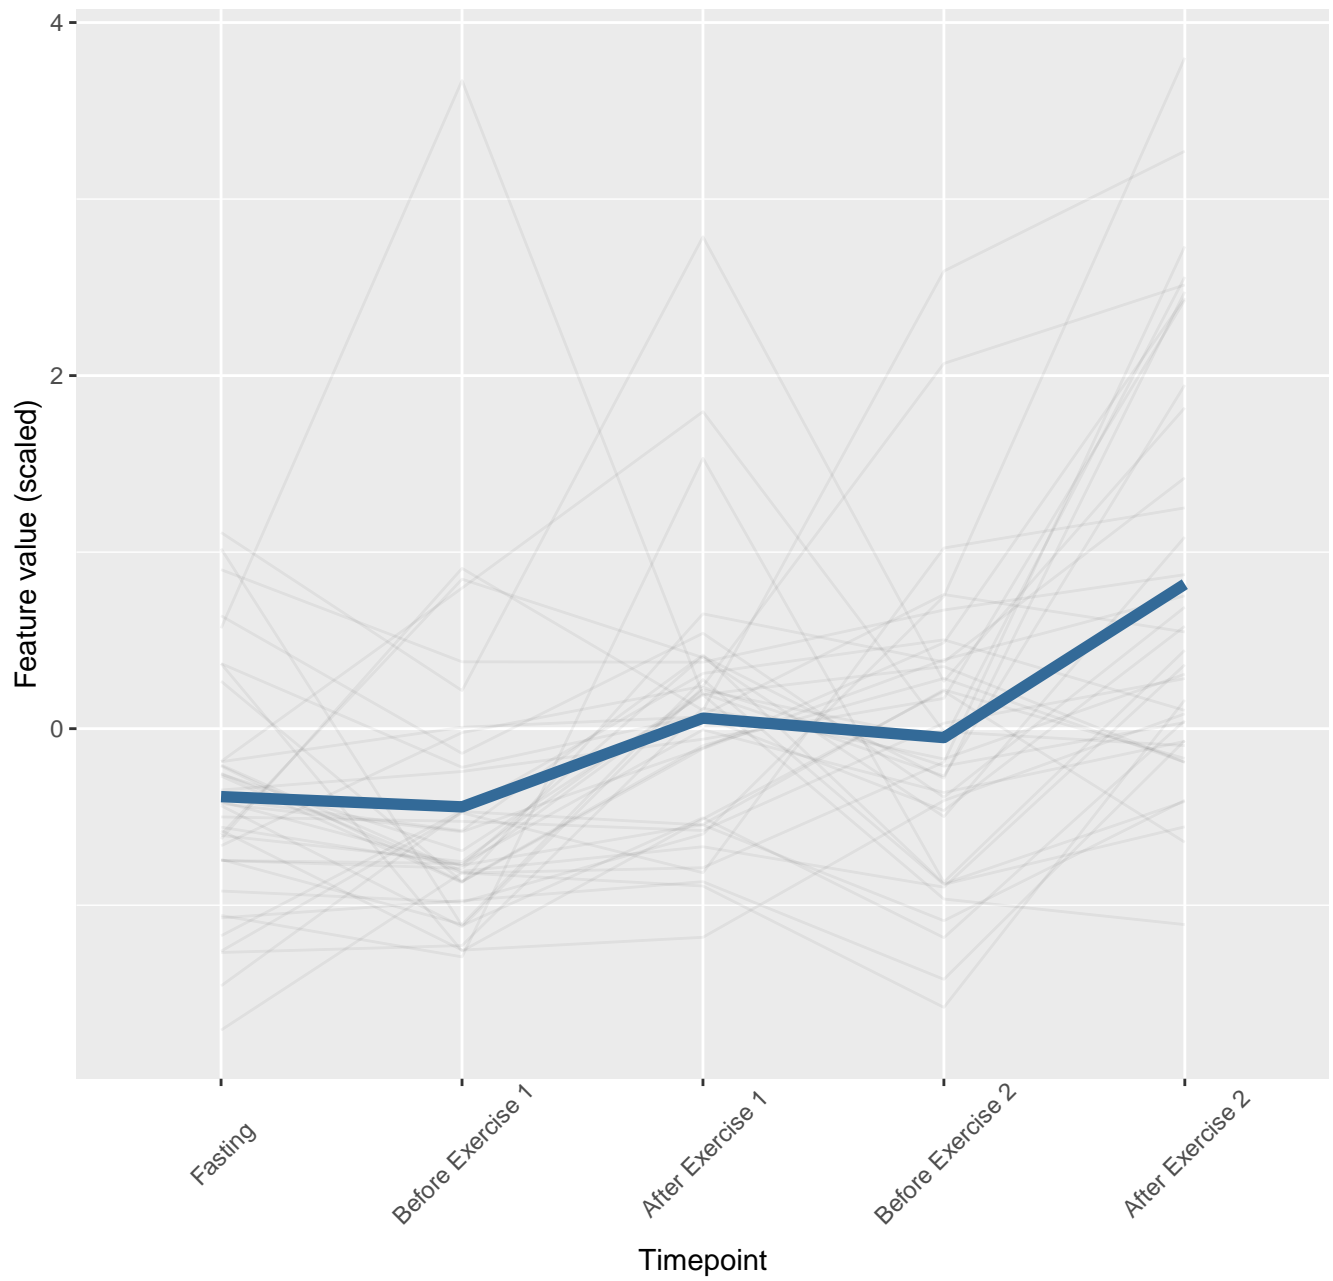

Line plot of TG(55:3)

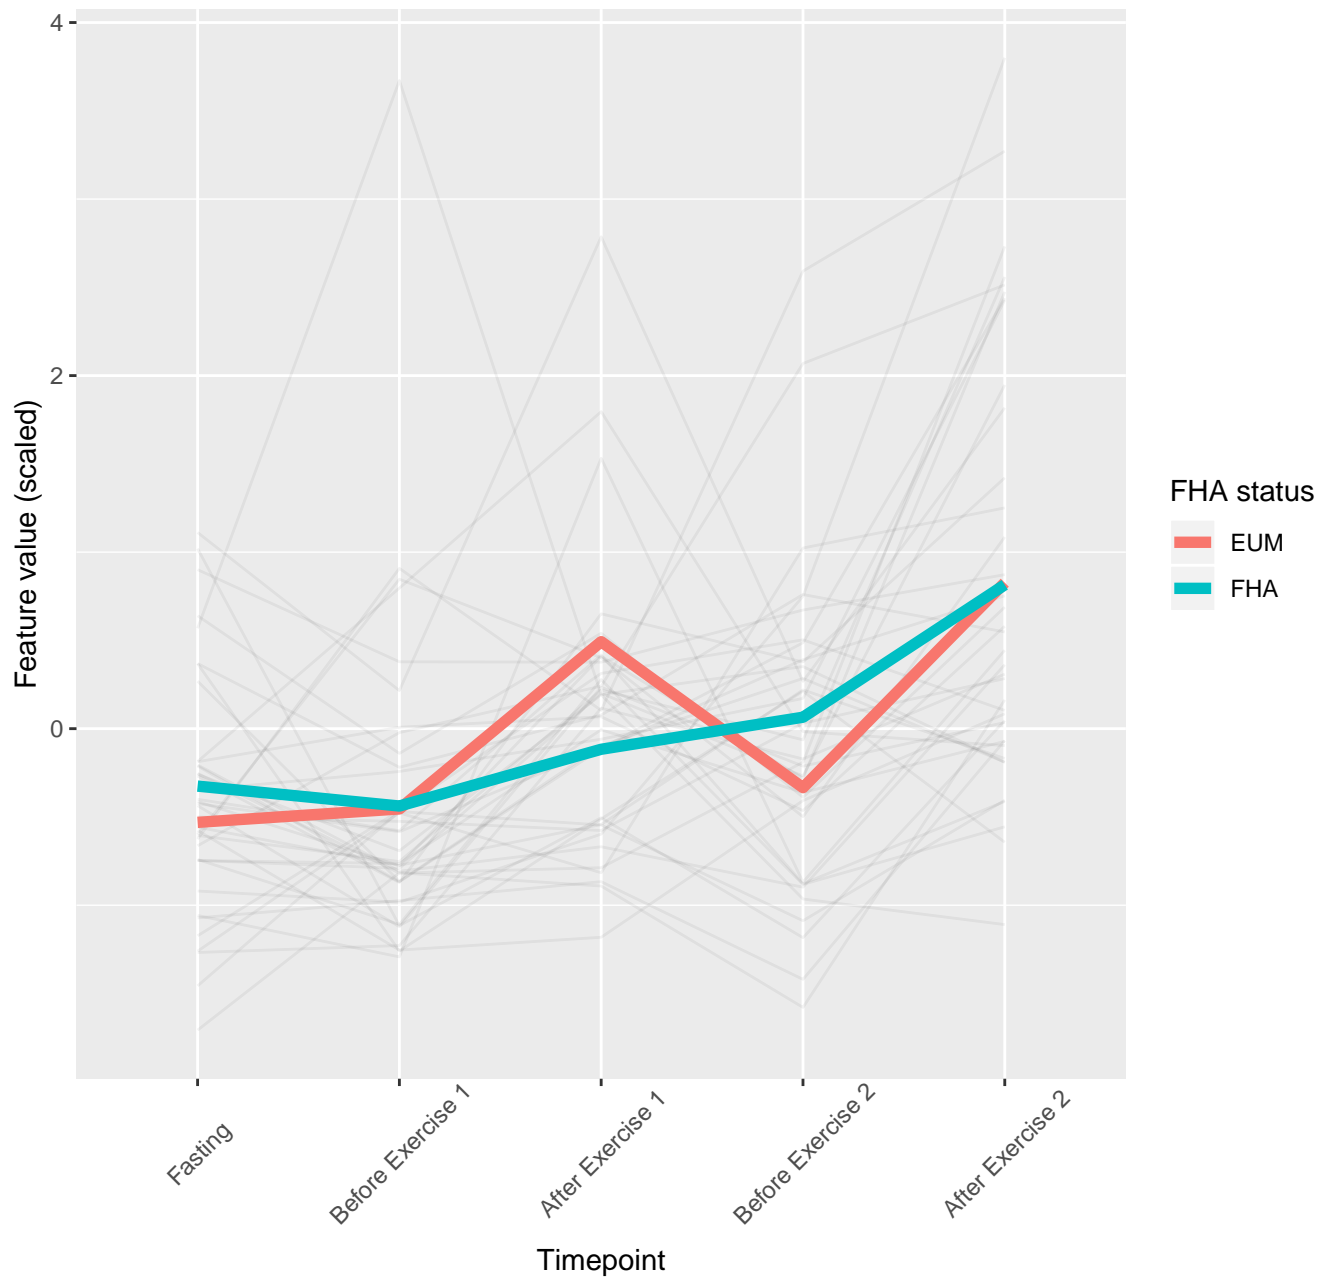

Line plot of TG(55:3)

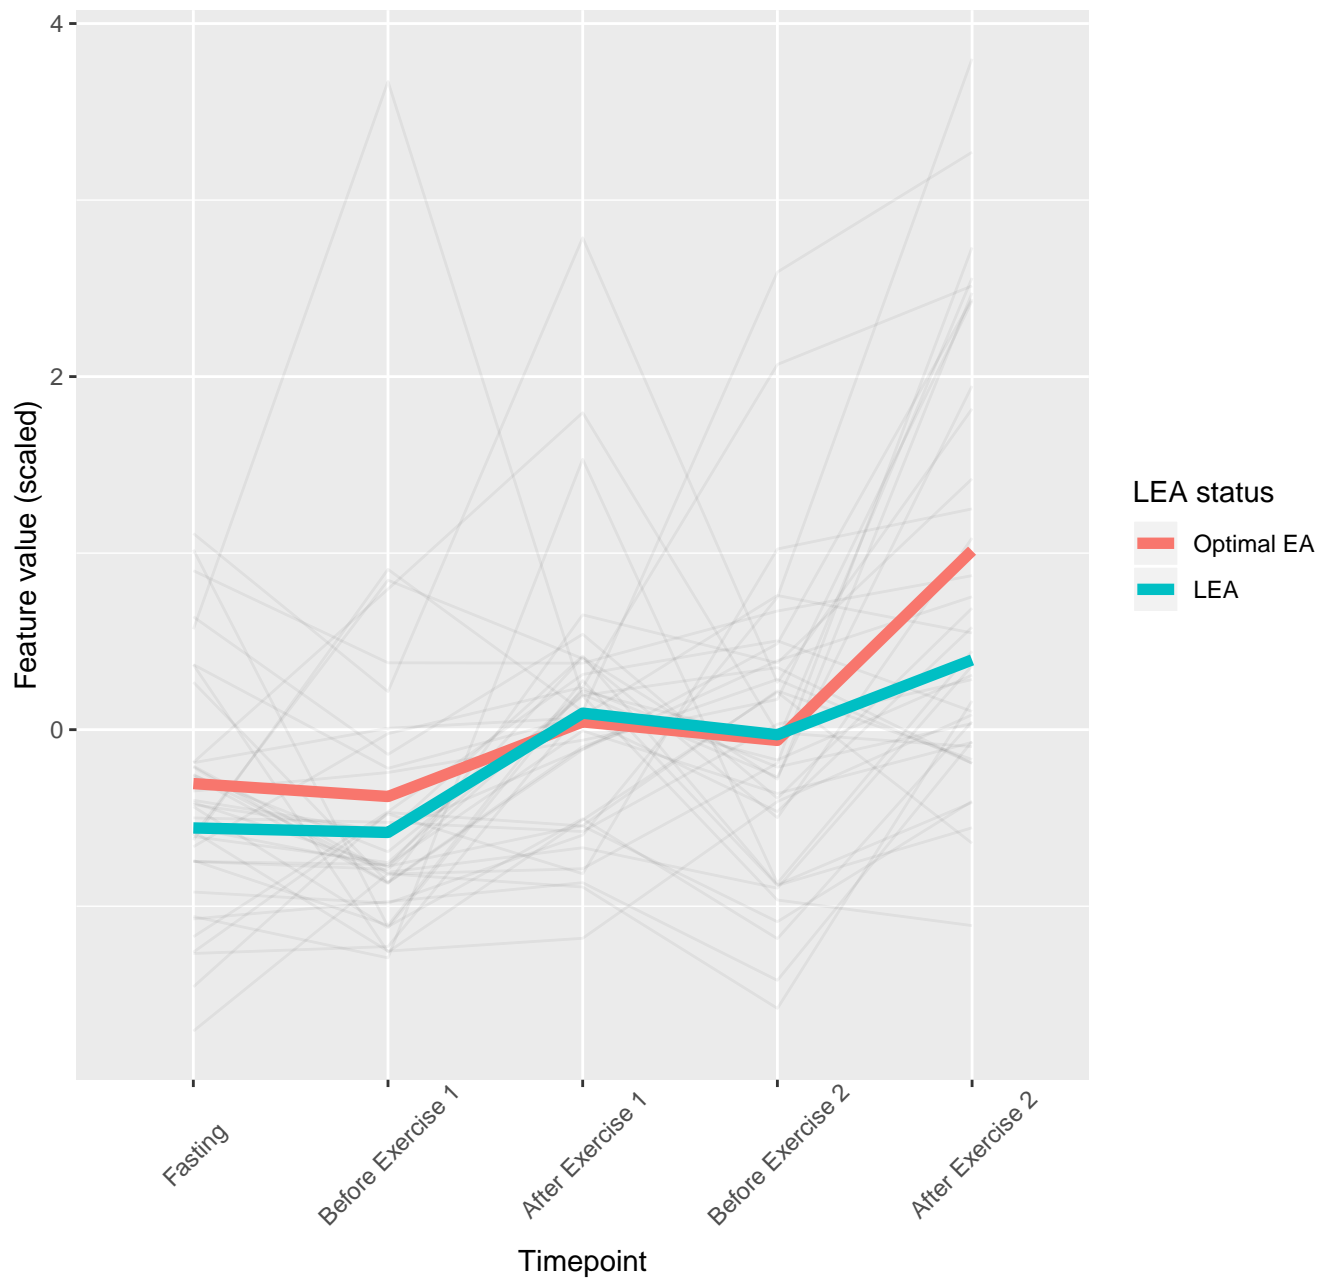

Line plot of TG(55:4)

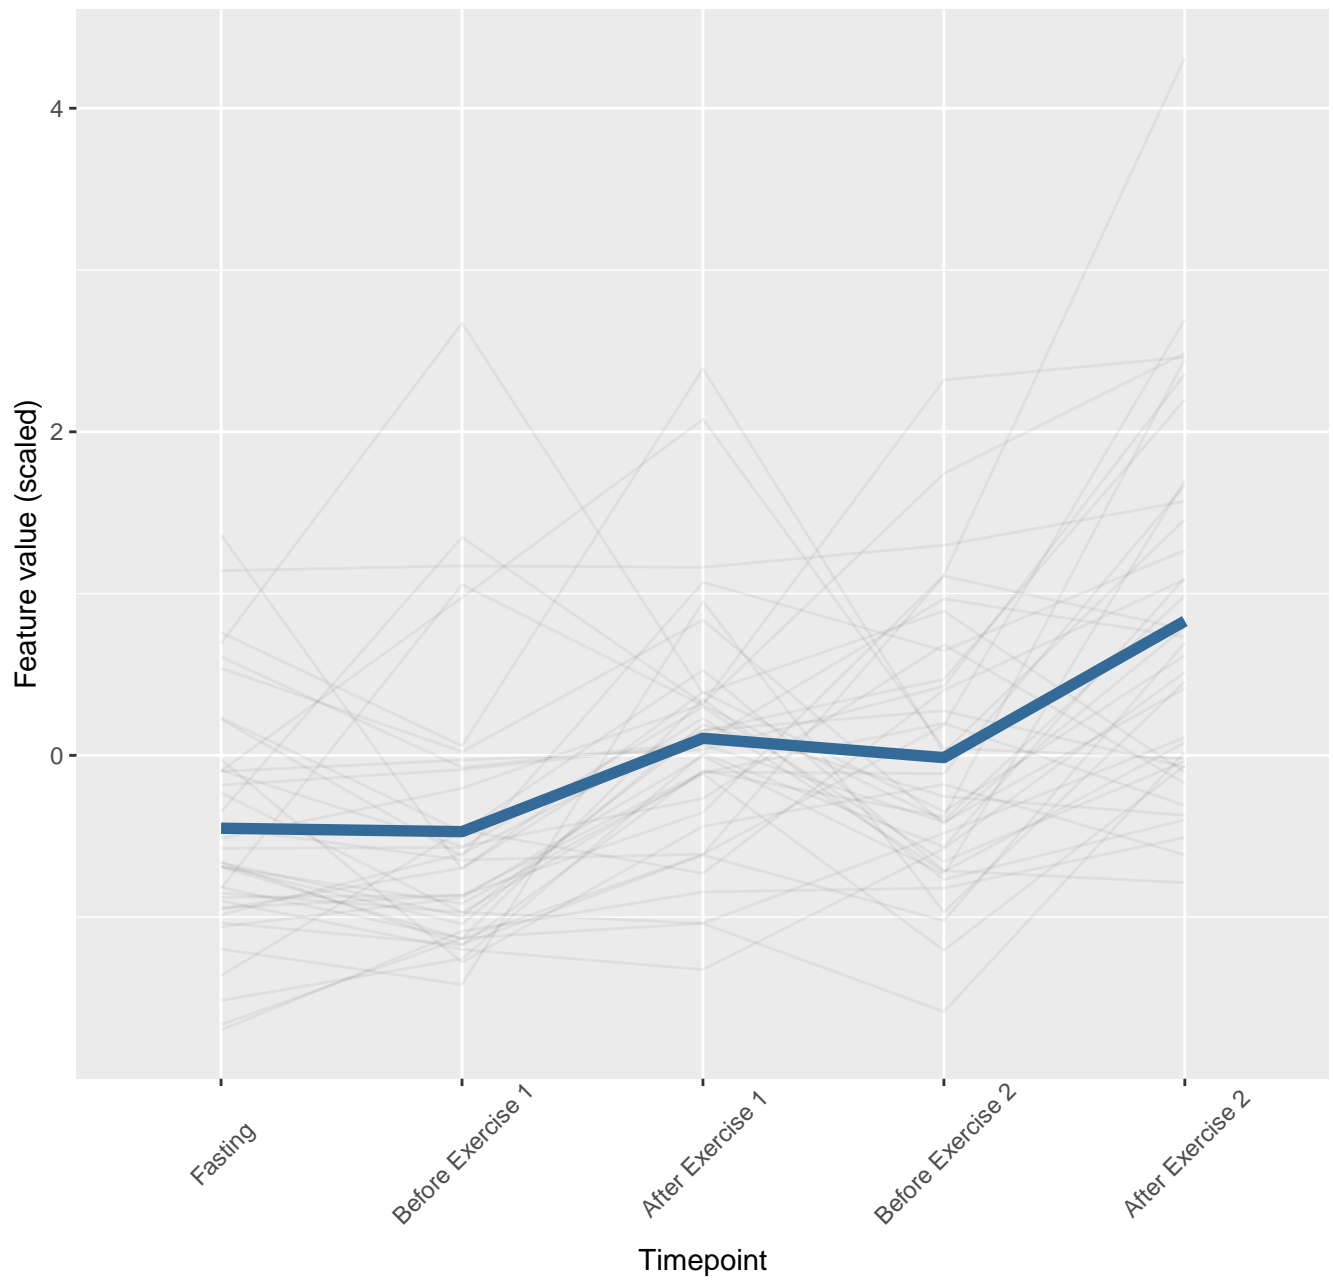

Line plot of TG(55:4)

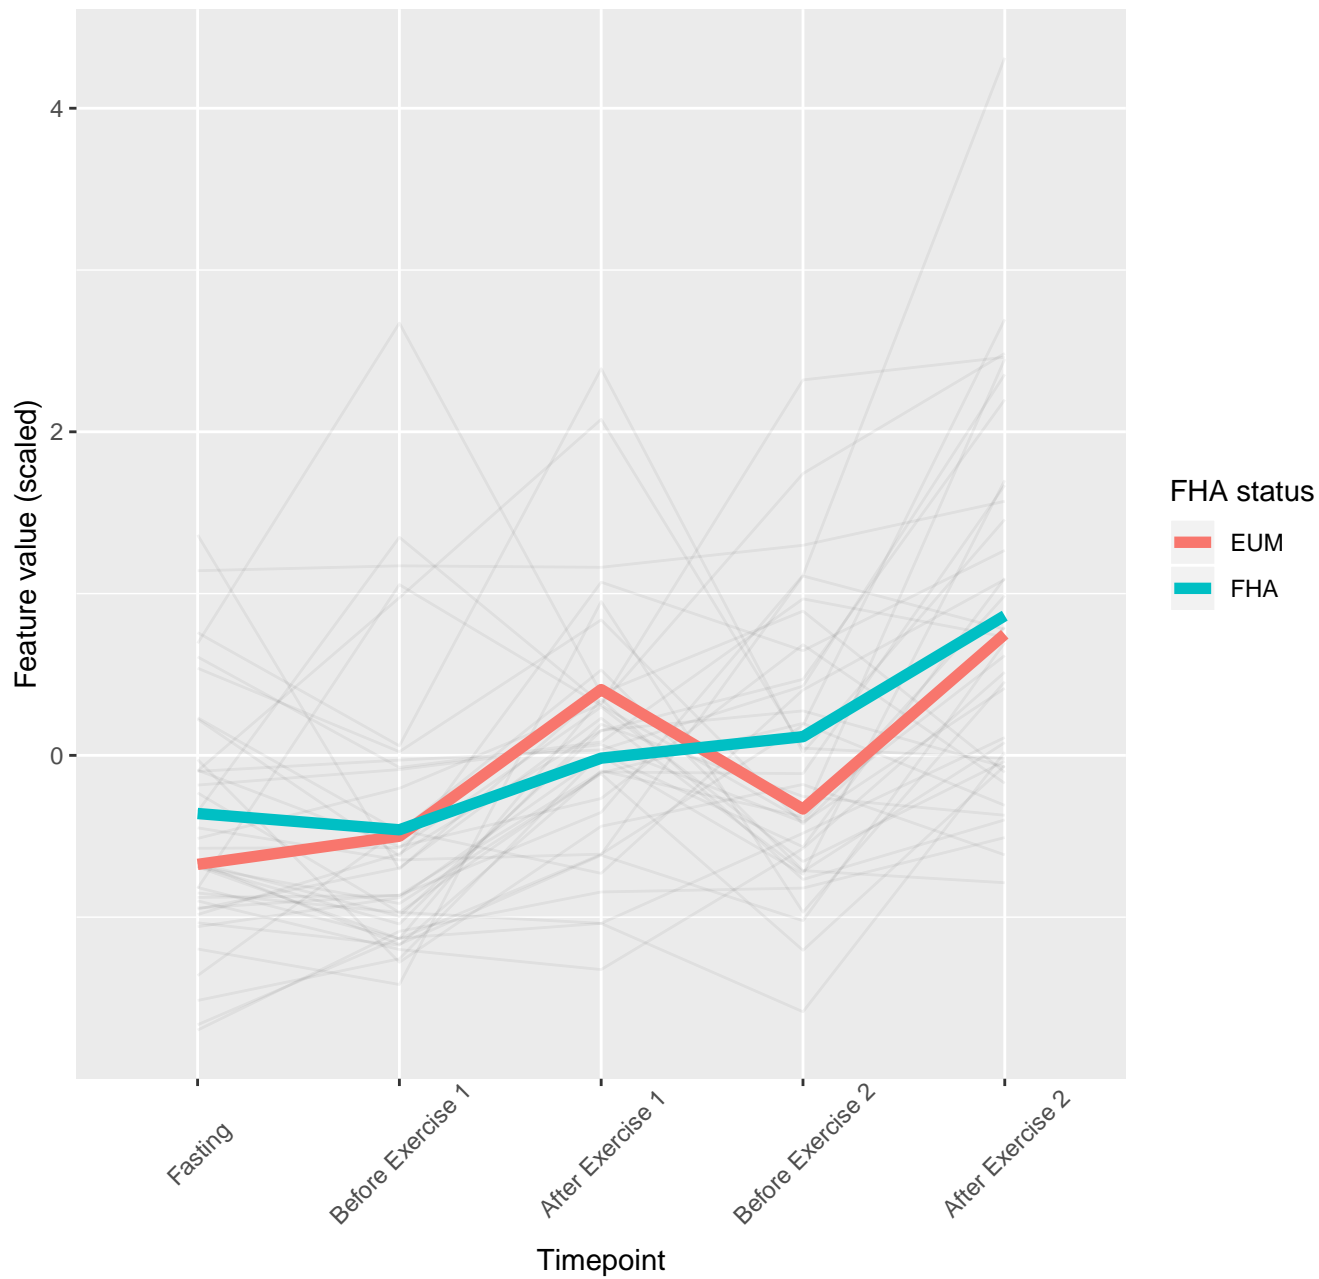

Line plot of TG(55:4)

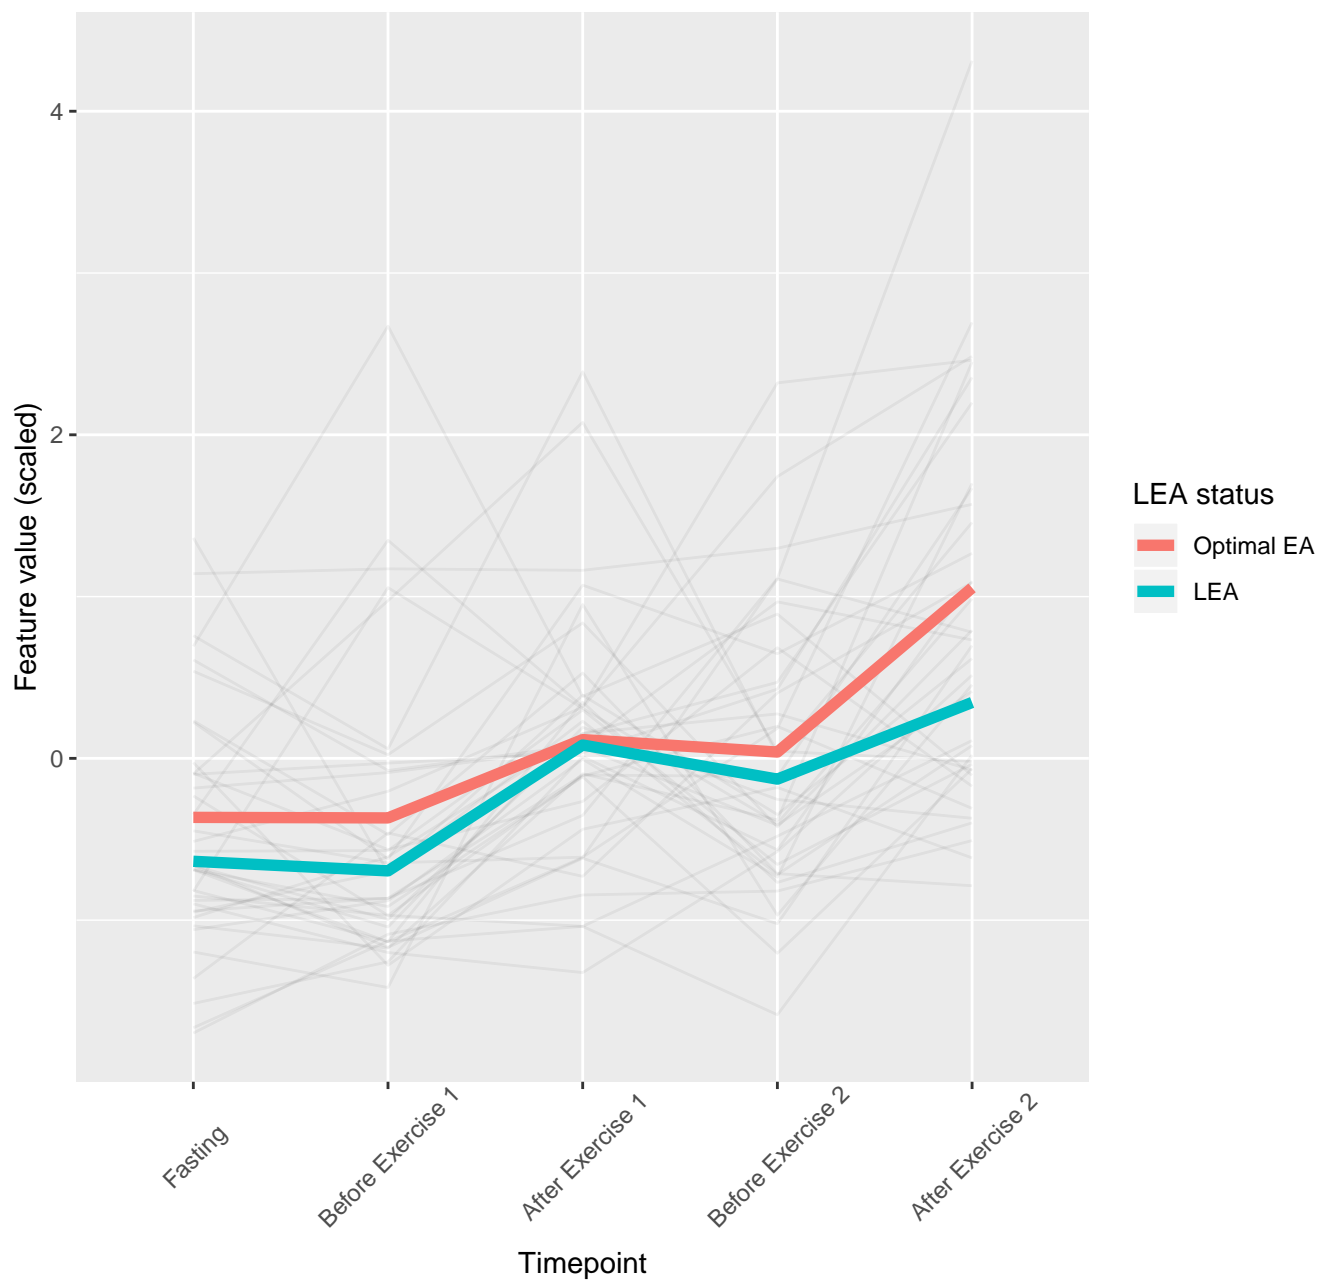

Line plot of TG(55:5)

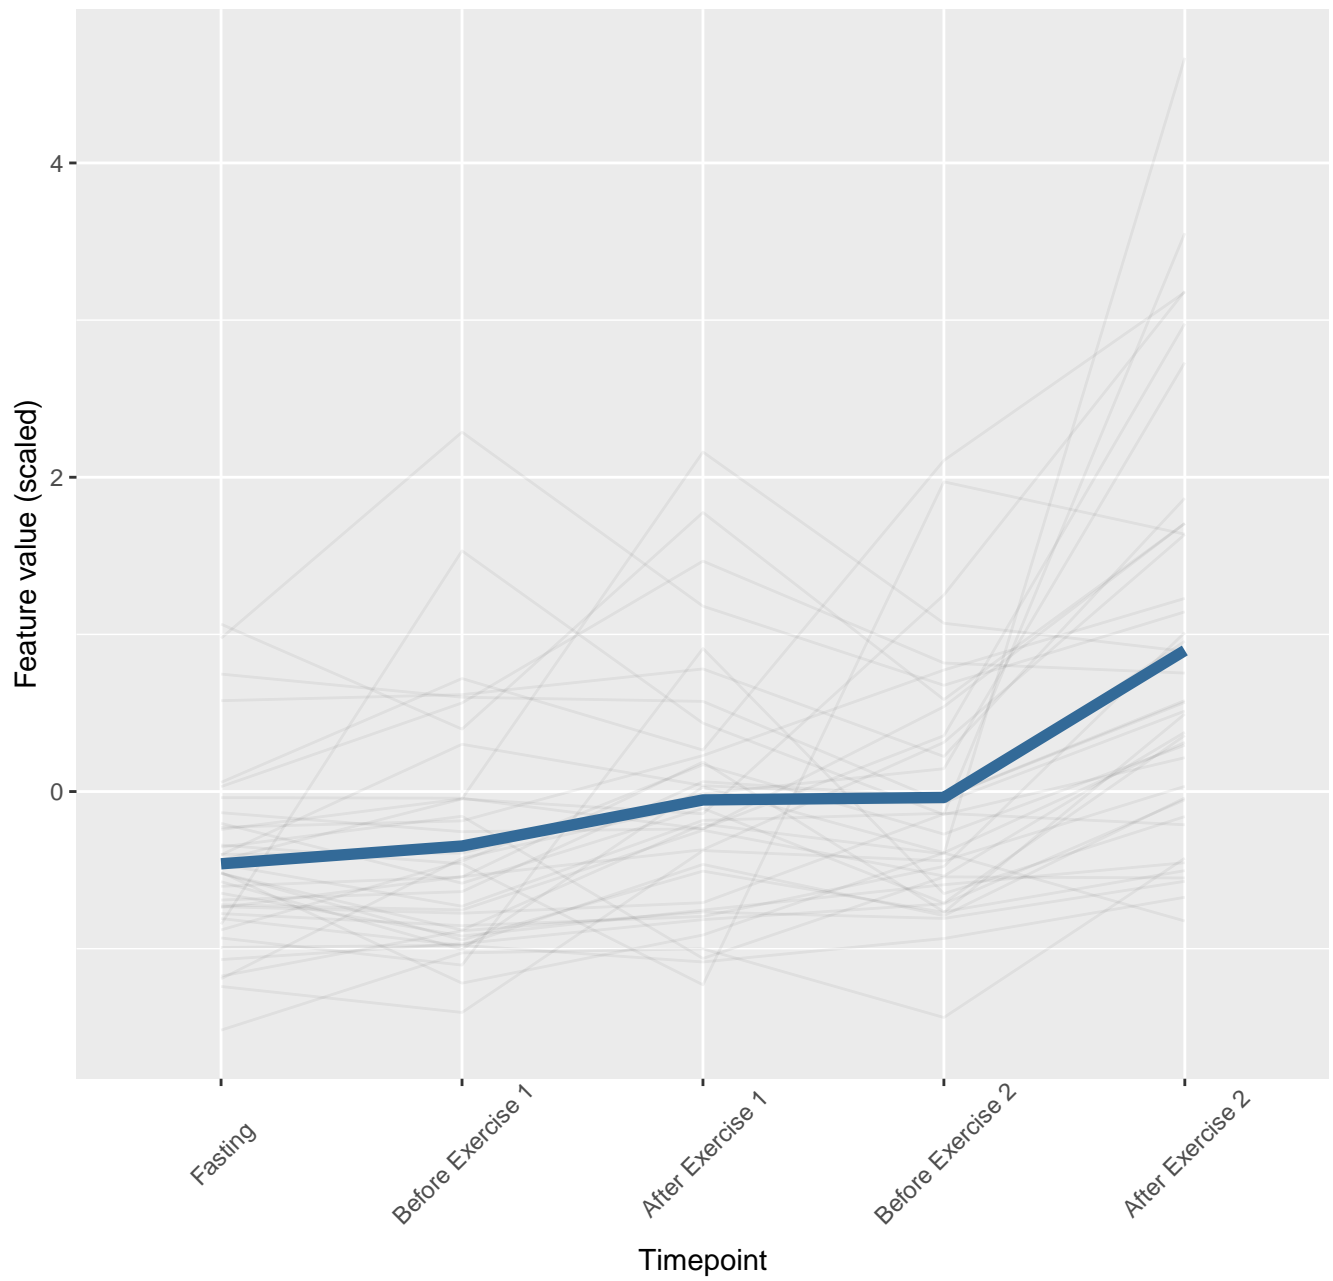



Line plot of TG(55:5)

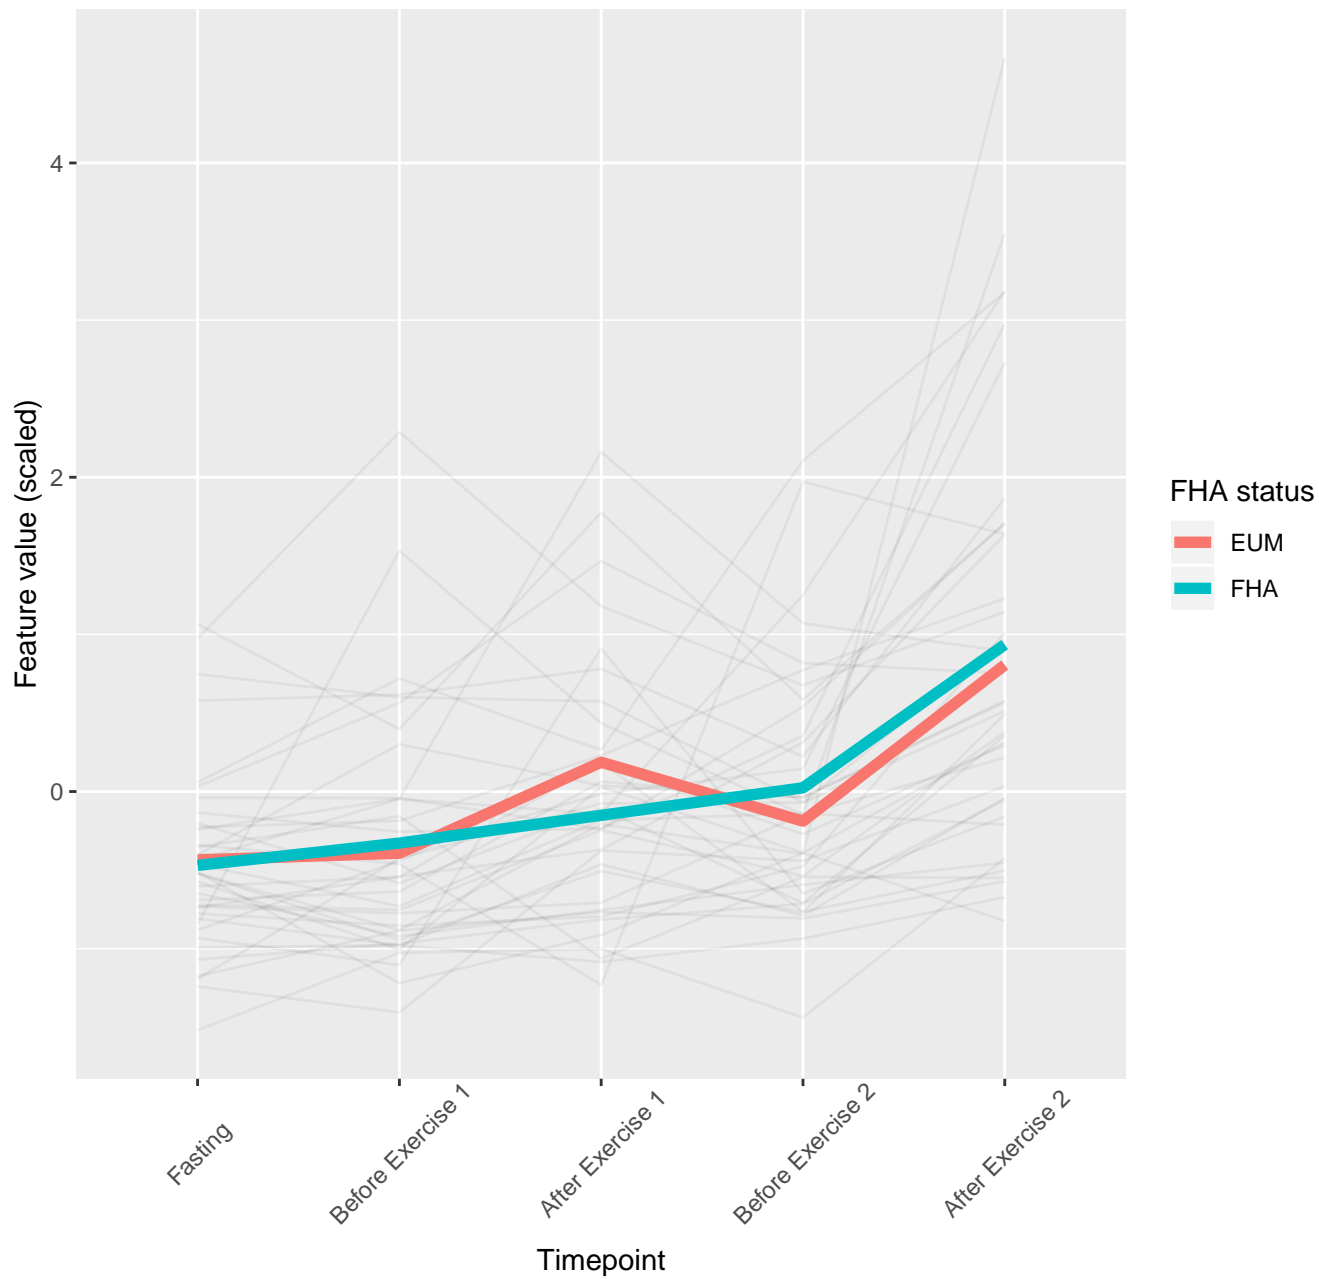

Line plot of TG(55:5)

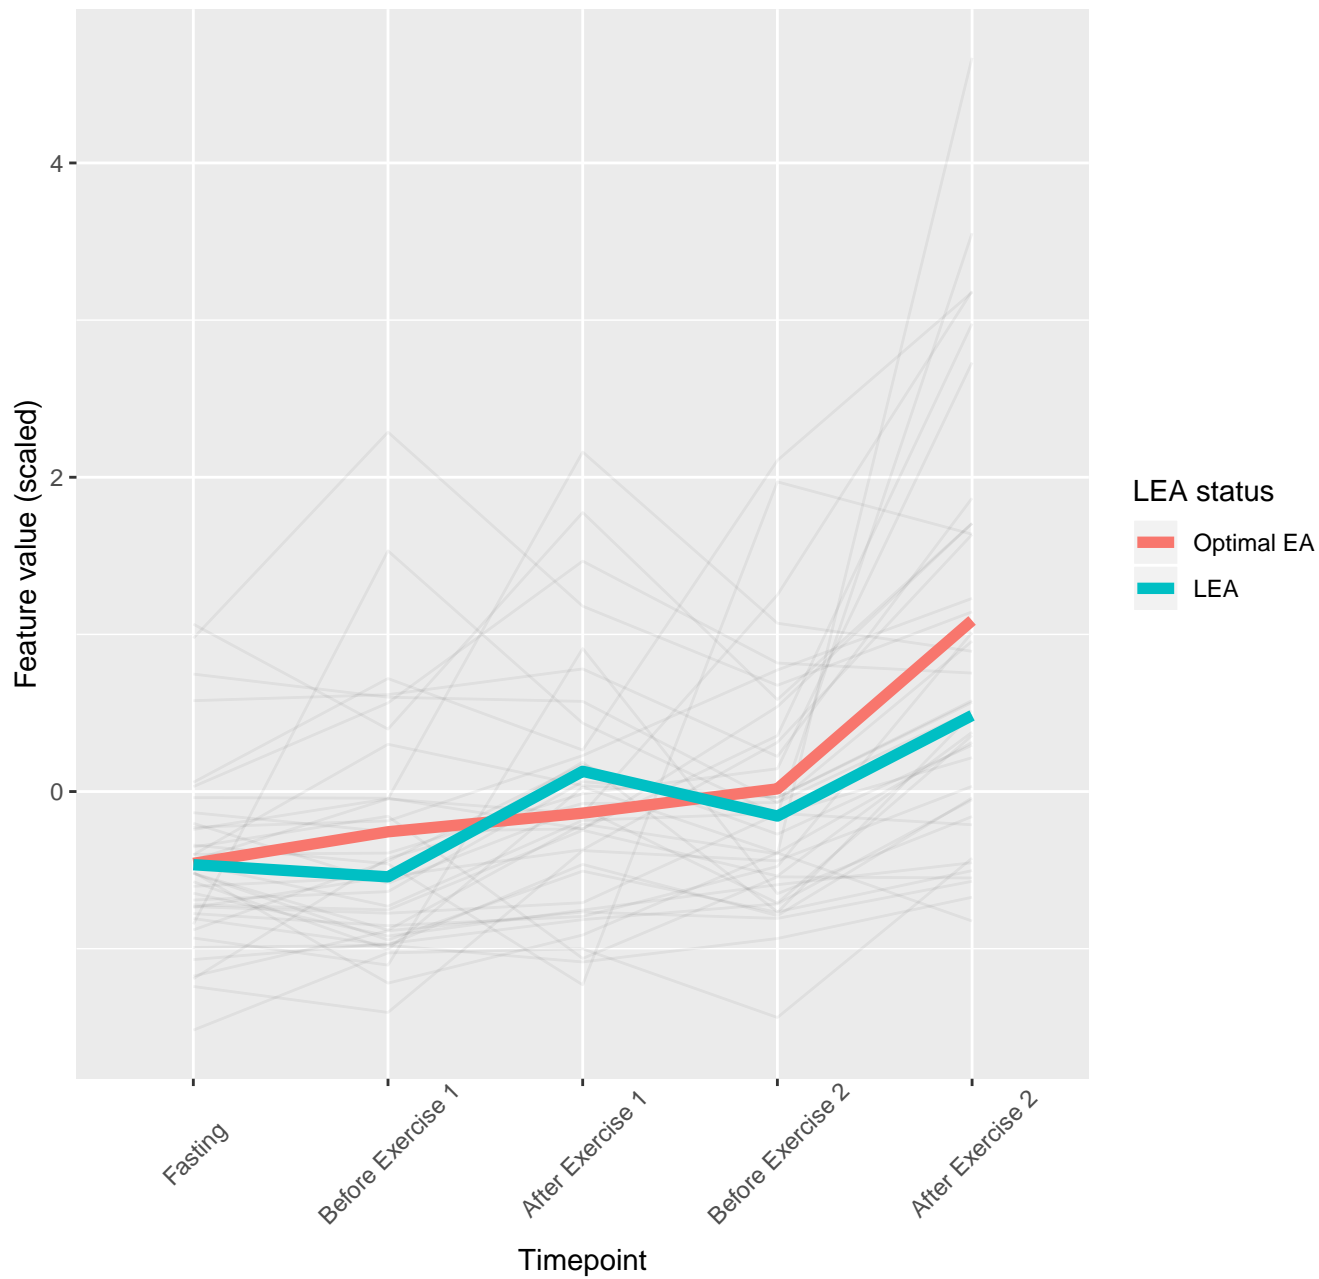

Line plot of TG(55:6)

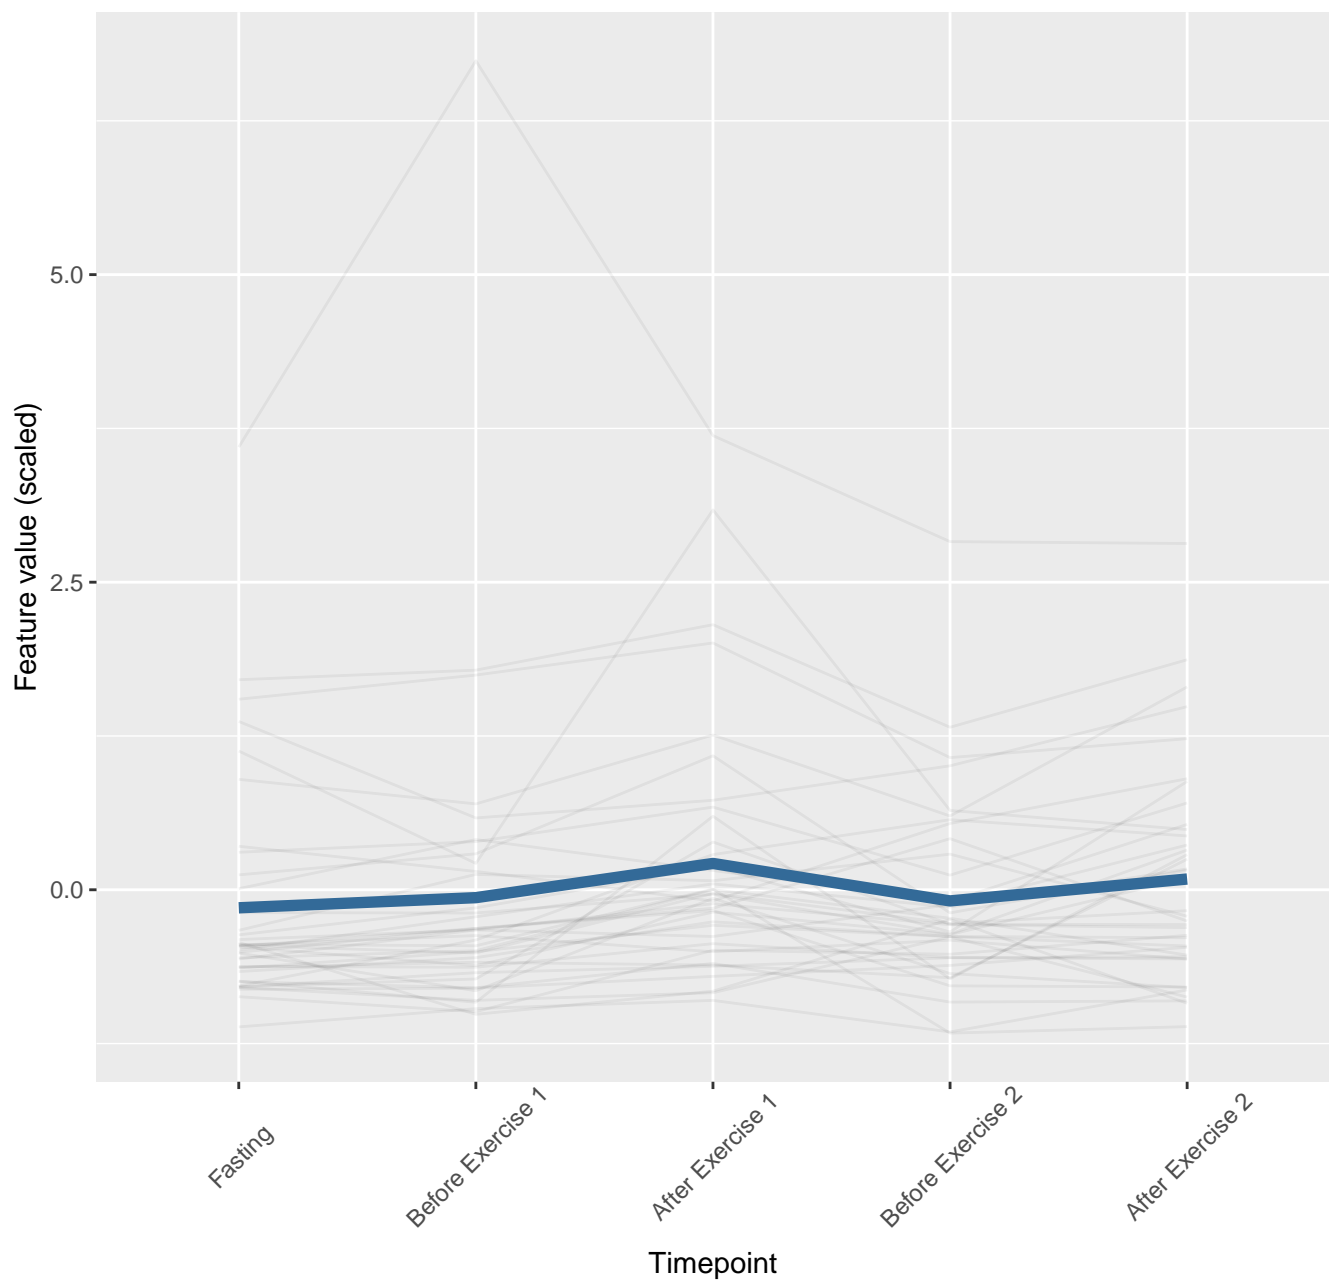

Line plot of TG(55:6)

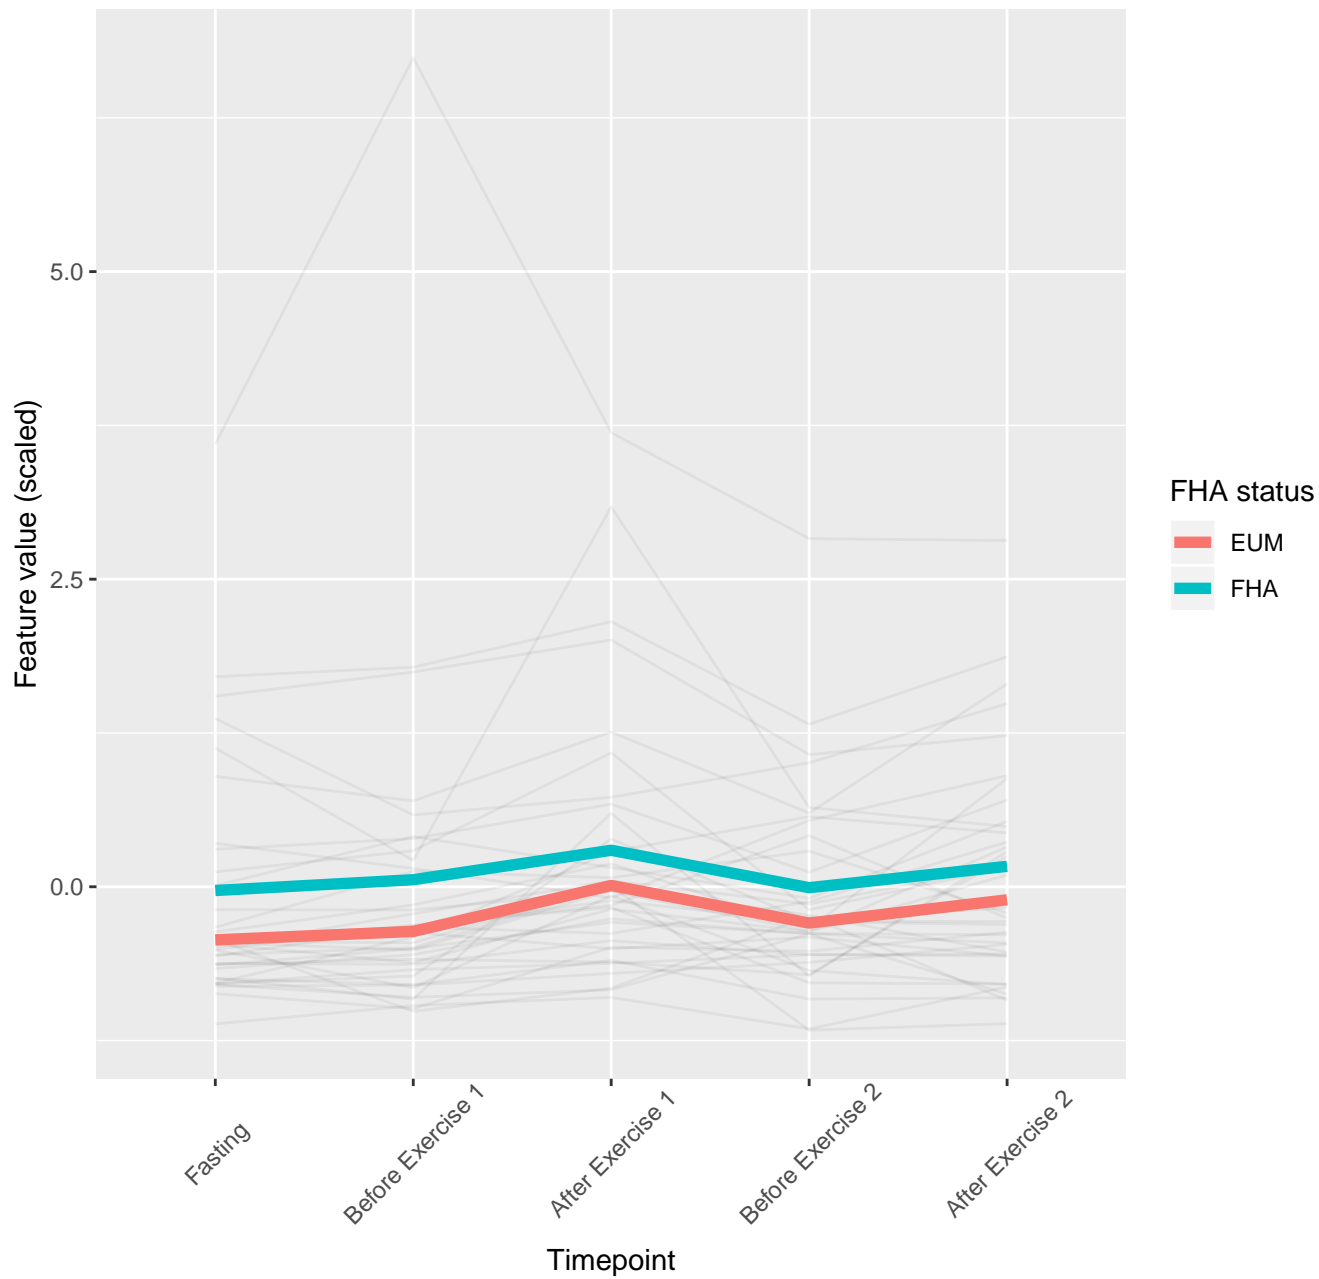

Line plot of TG(55:6)

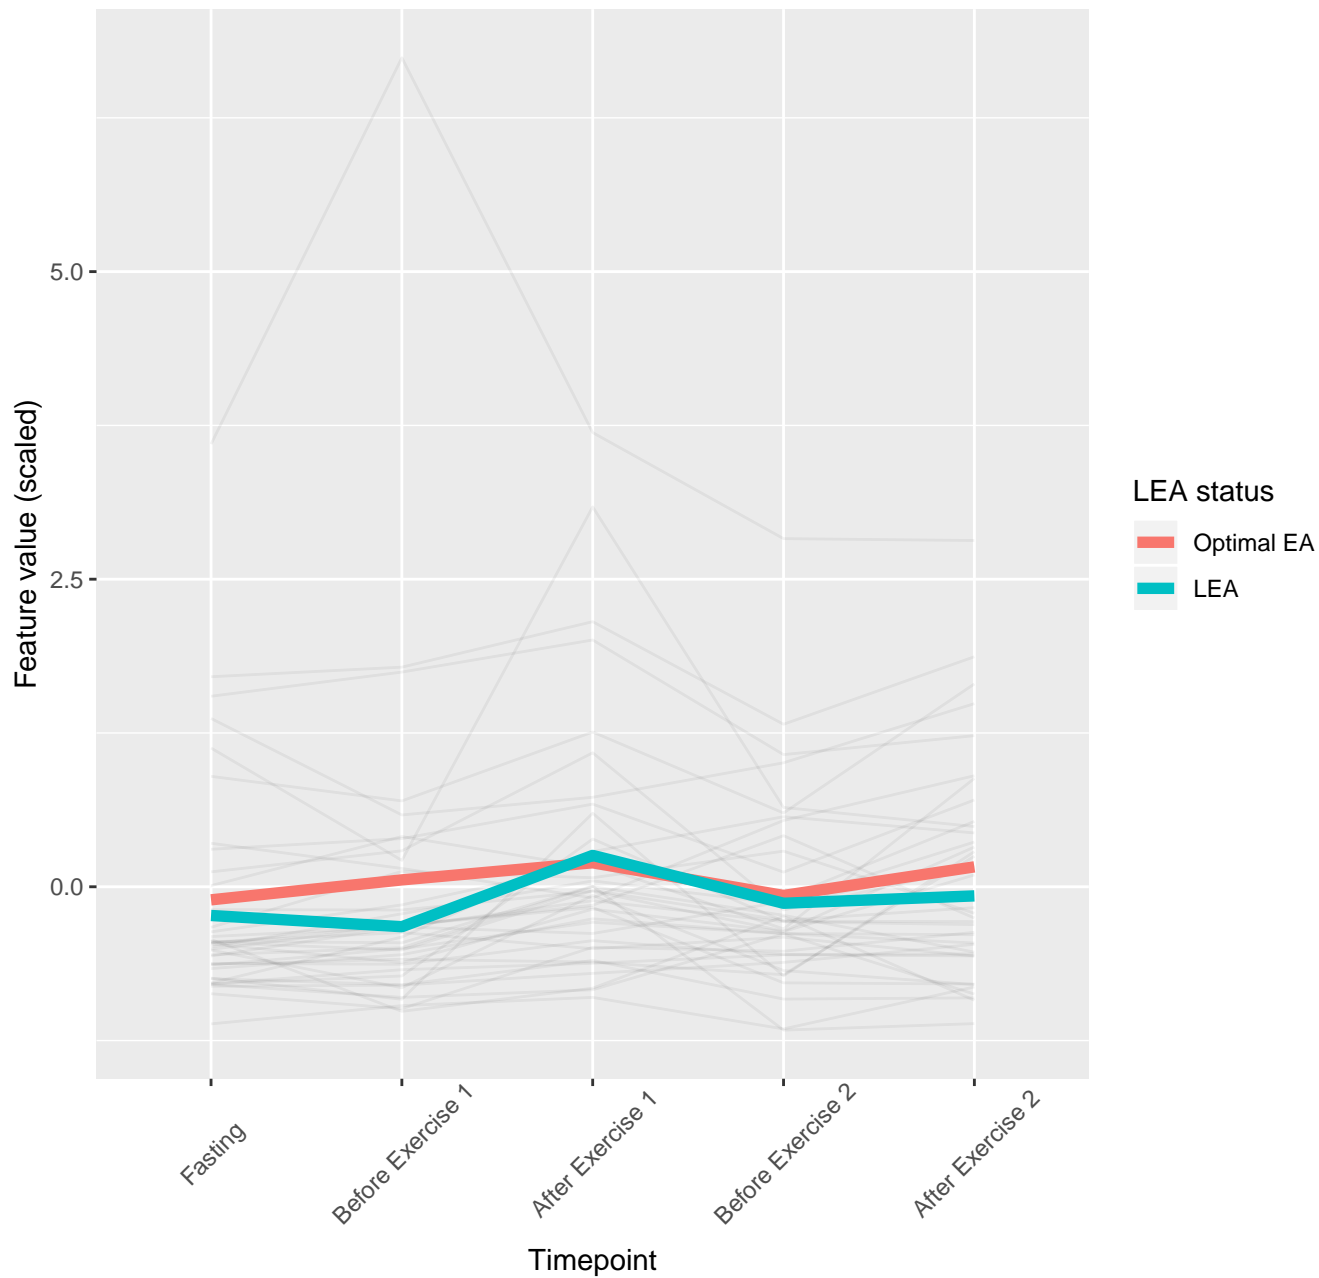

Line plot of TG(55:7)

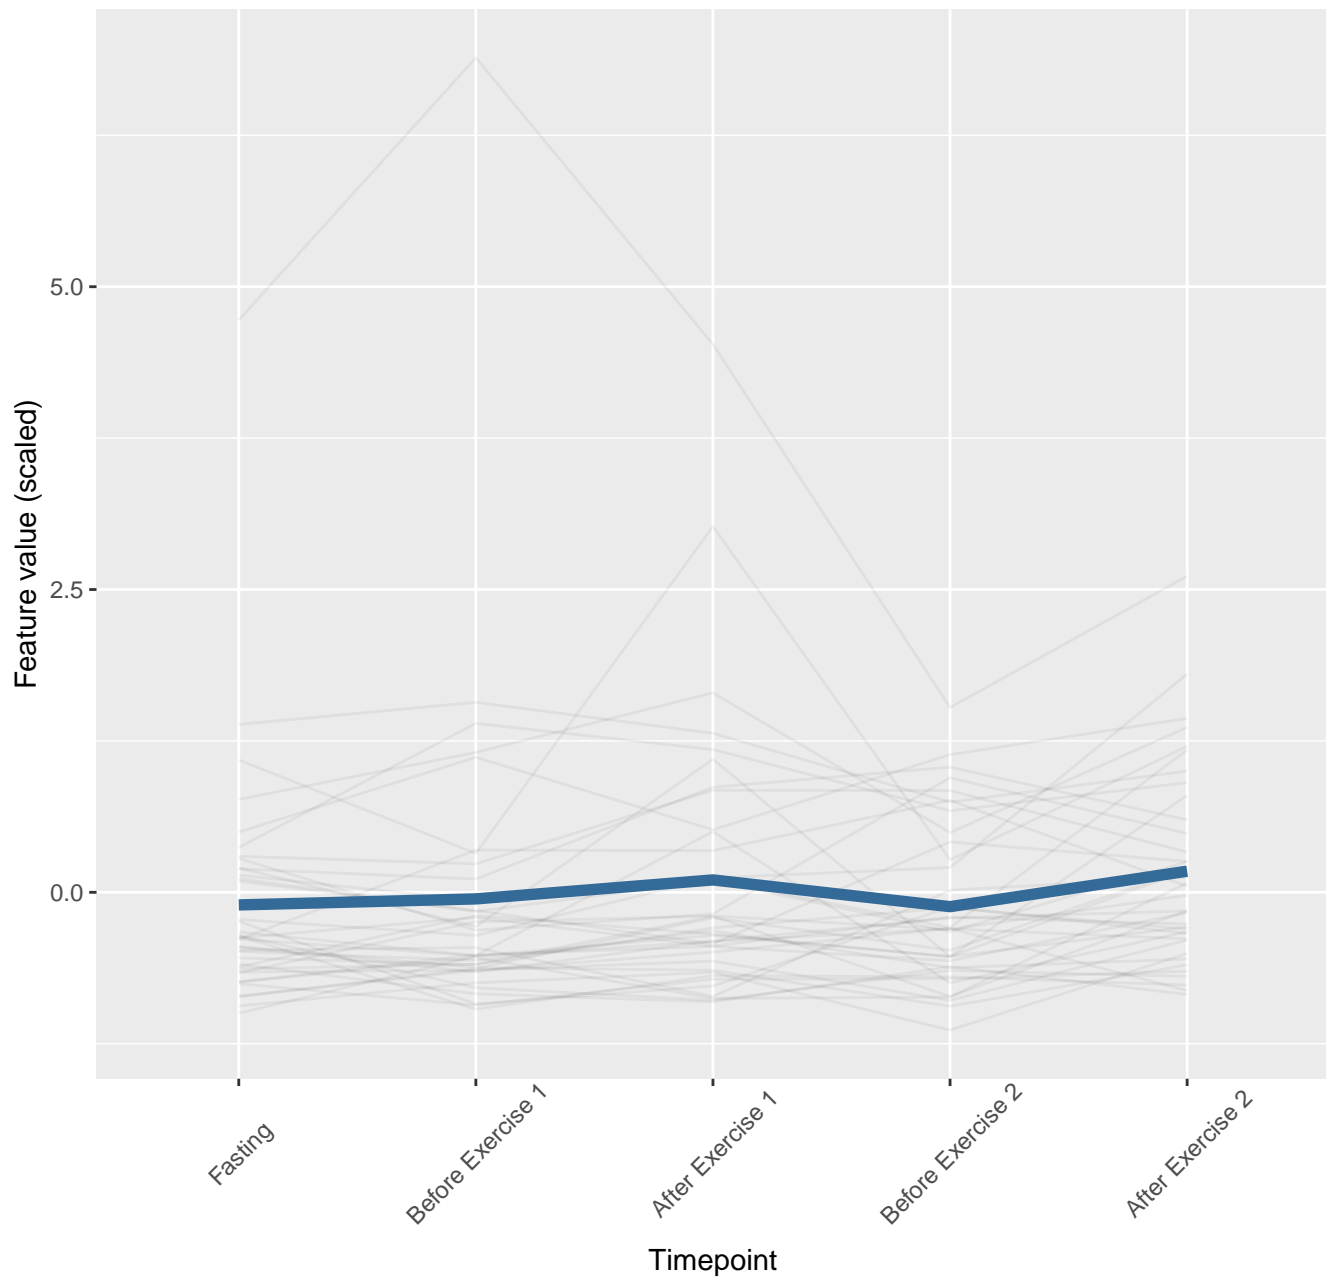

Line plot of TG(55:7)

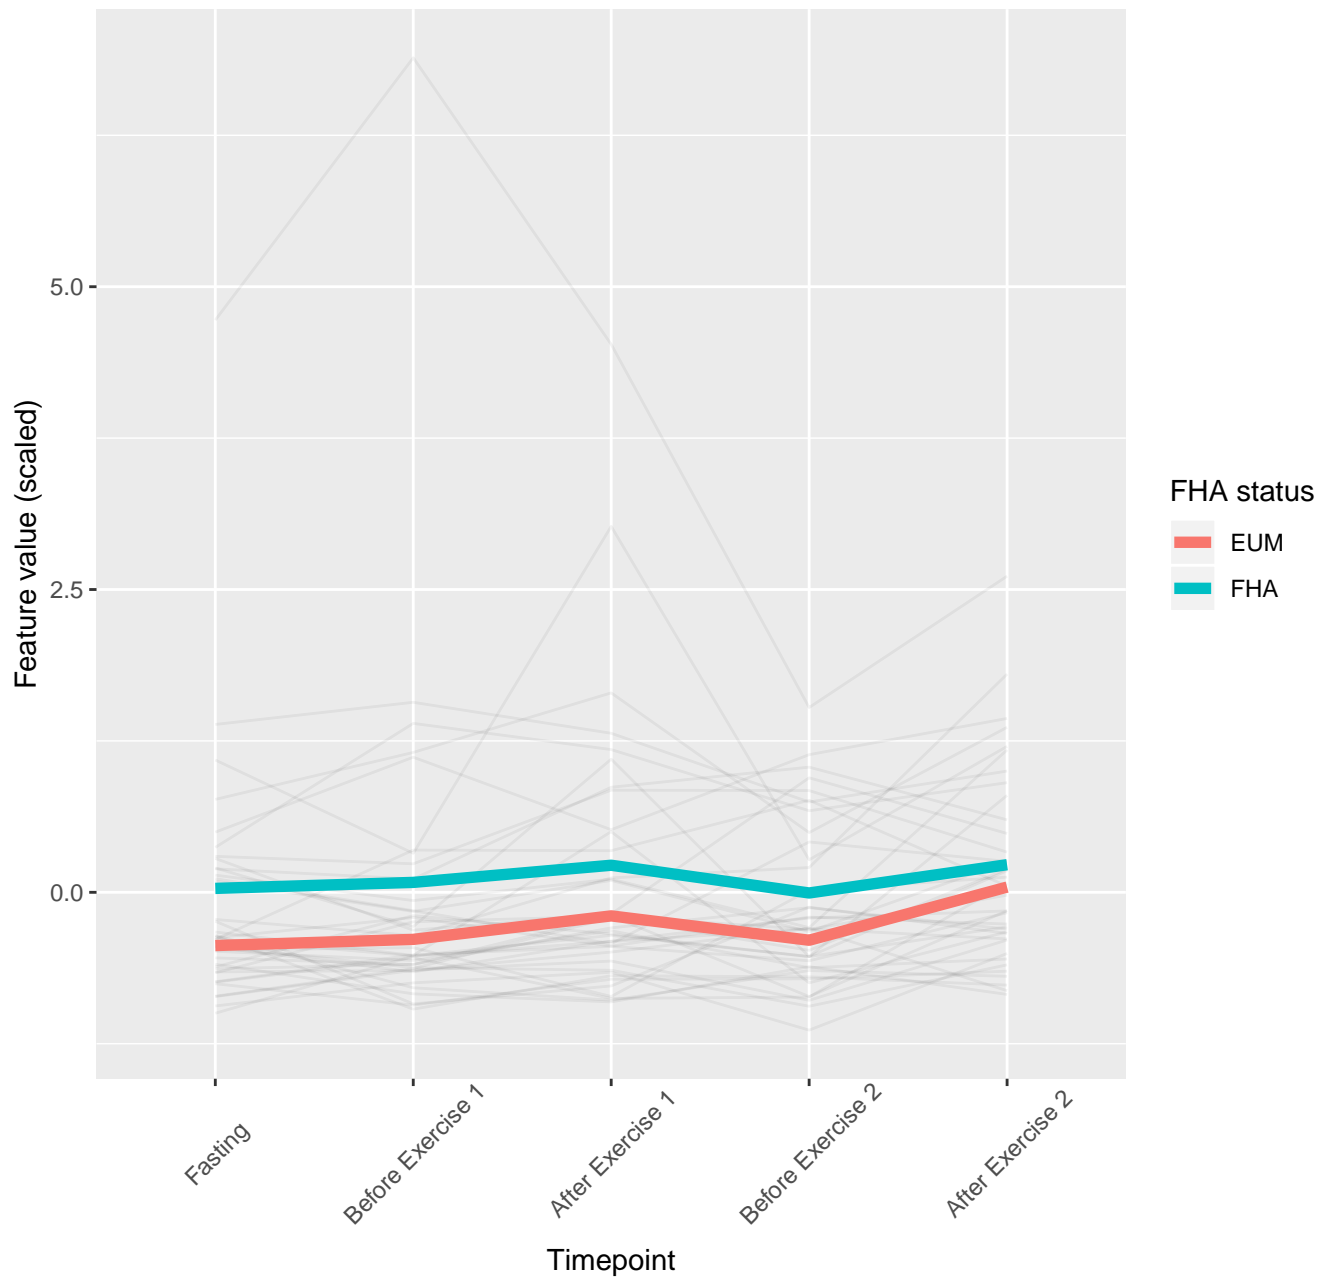

Line plot of TG(55:7)

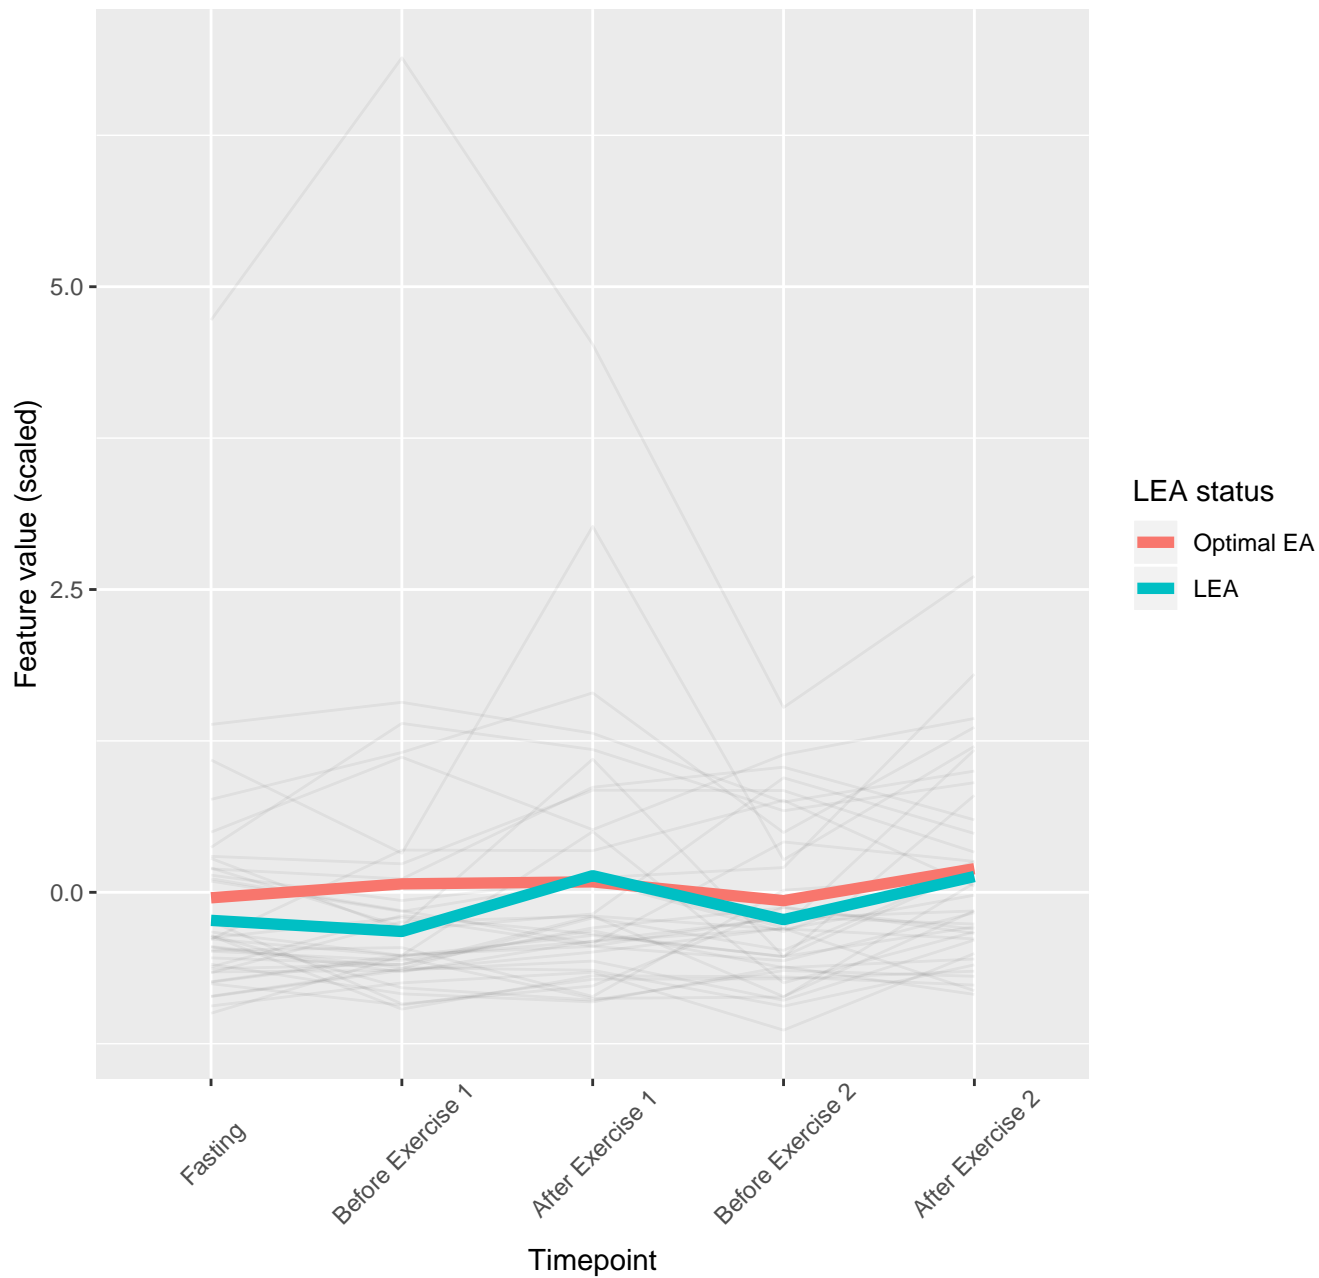



Line plot of TG(56:1)

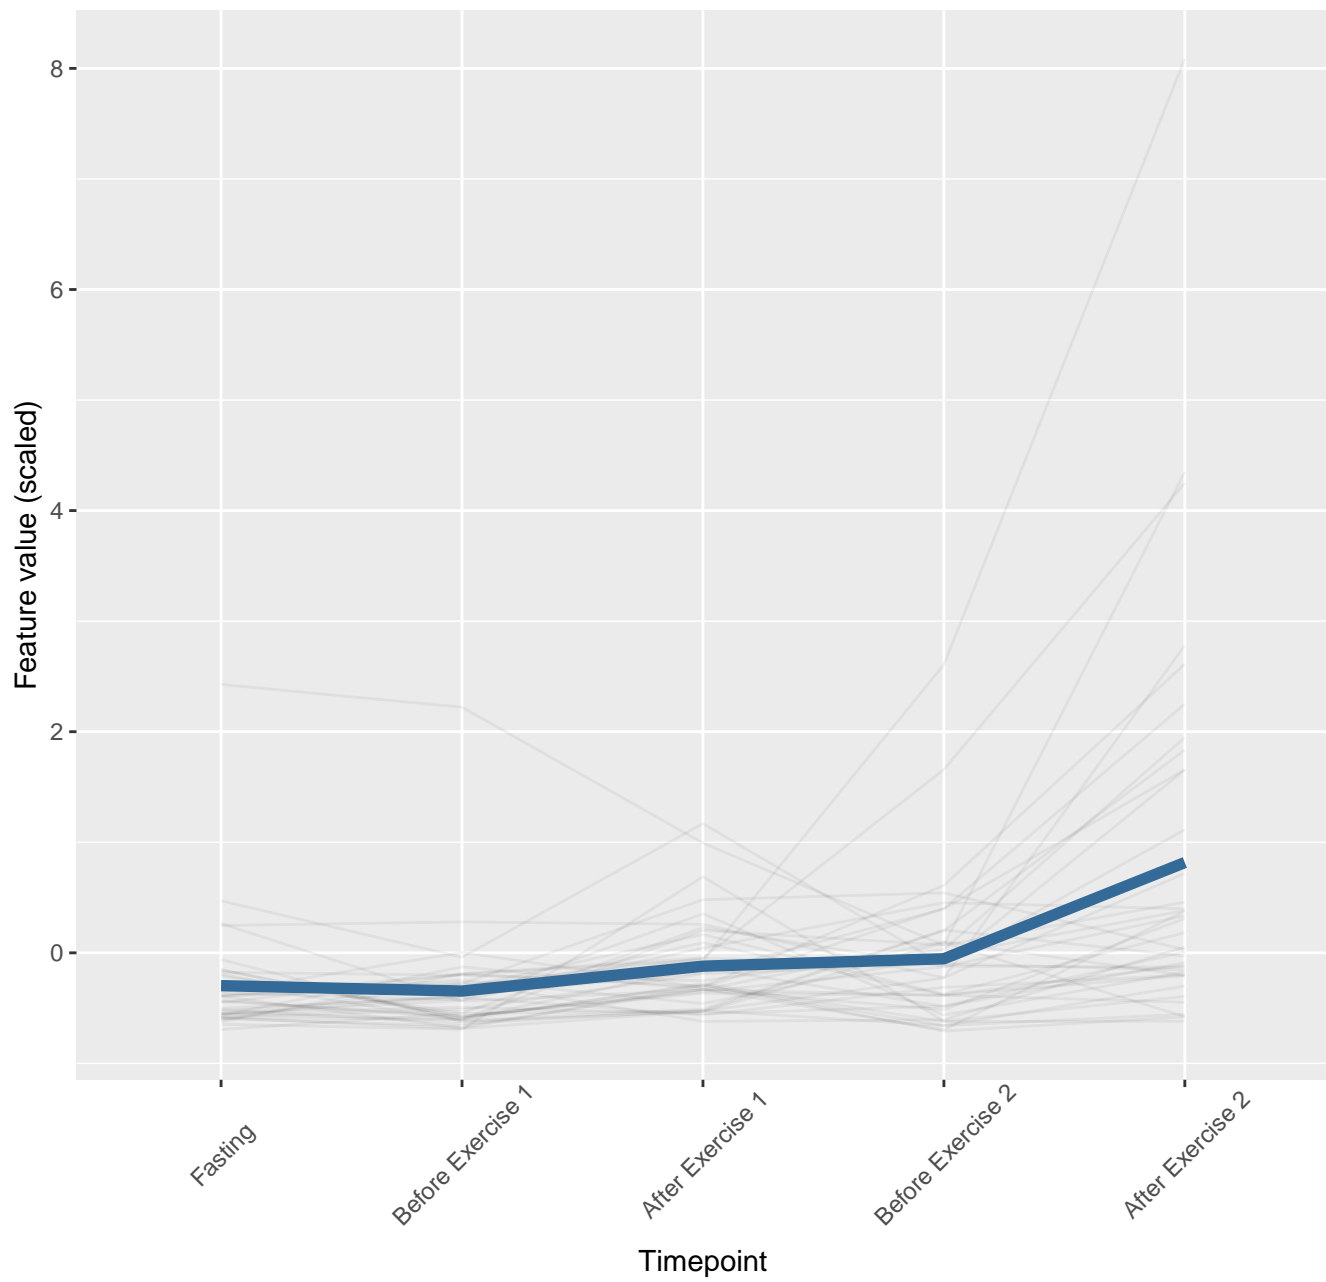

Line plot of TG(56:1)

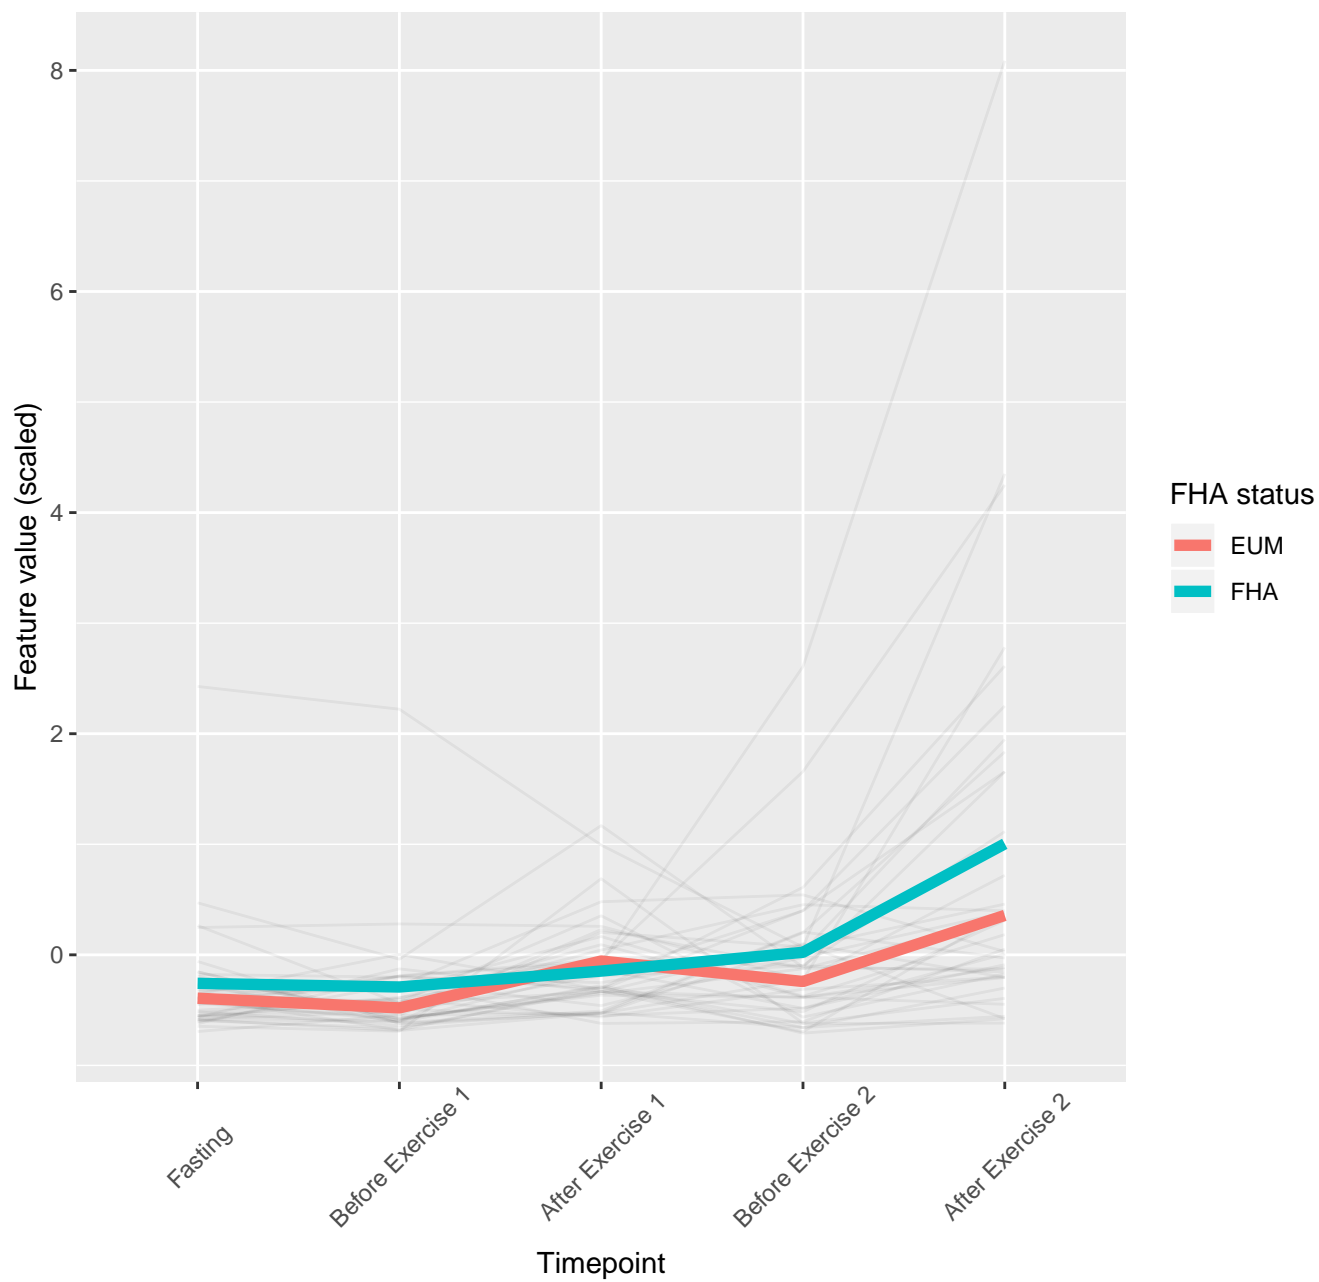

Line plot of TG(56:1)

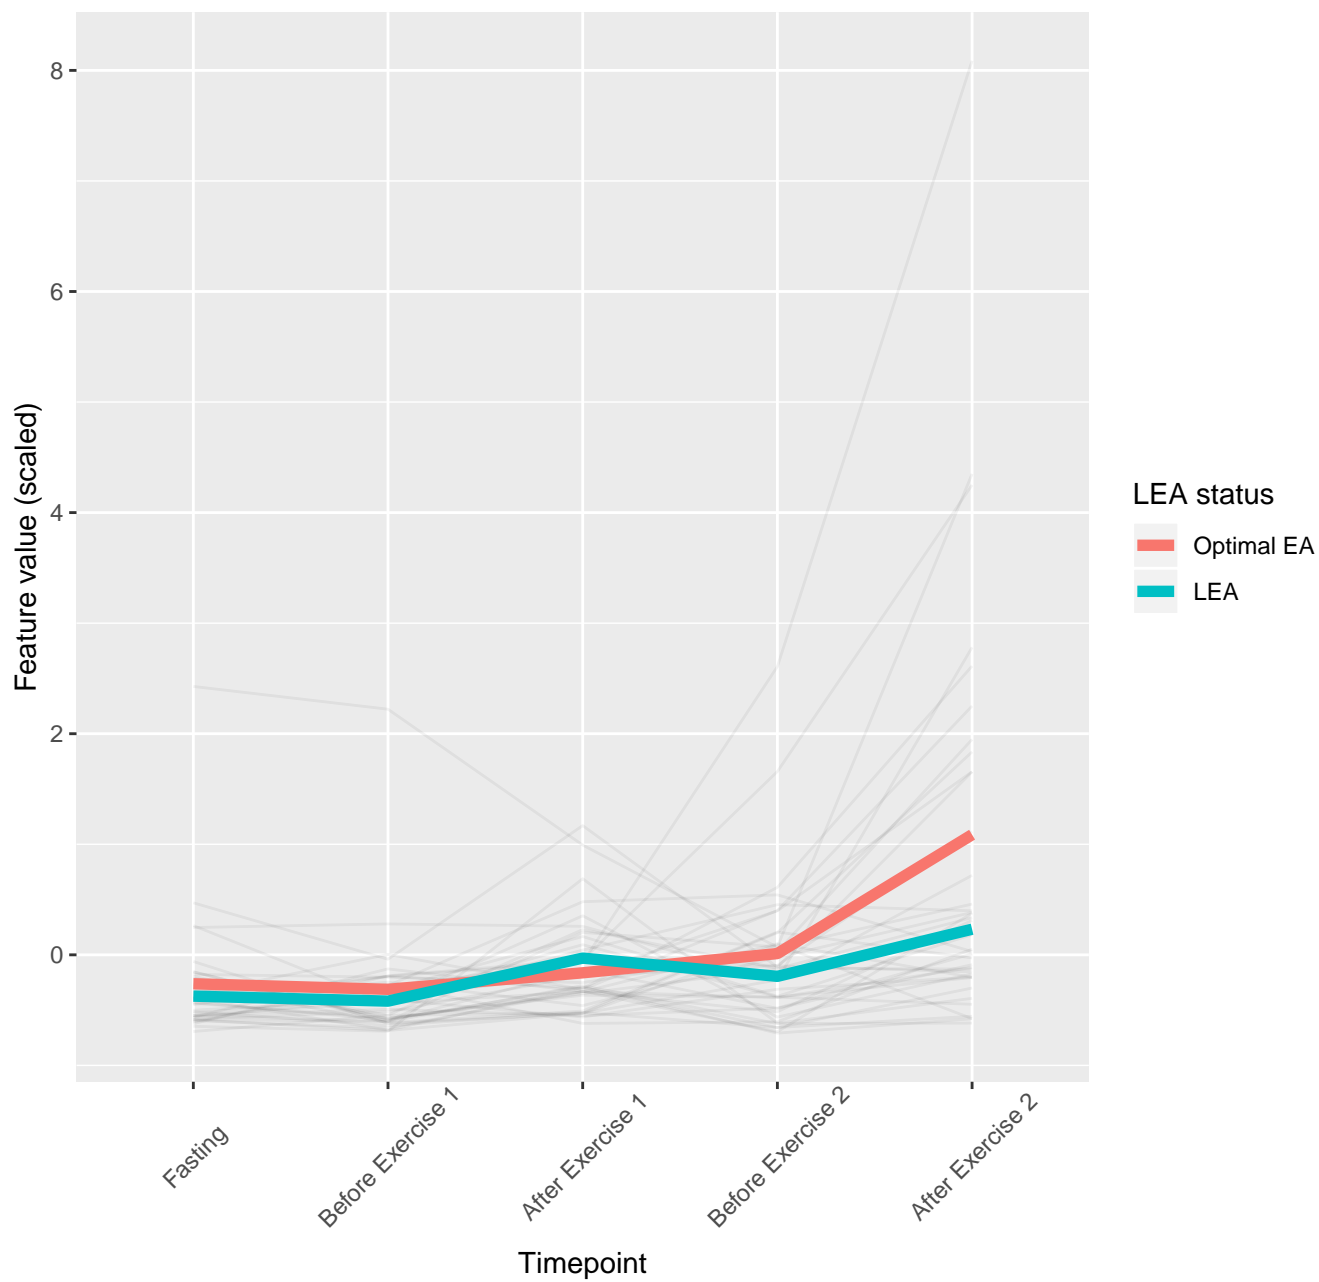

Line plot of TG(56:2)

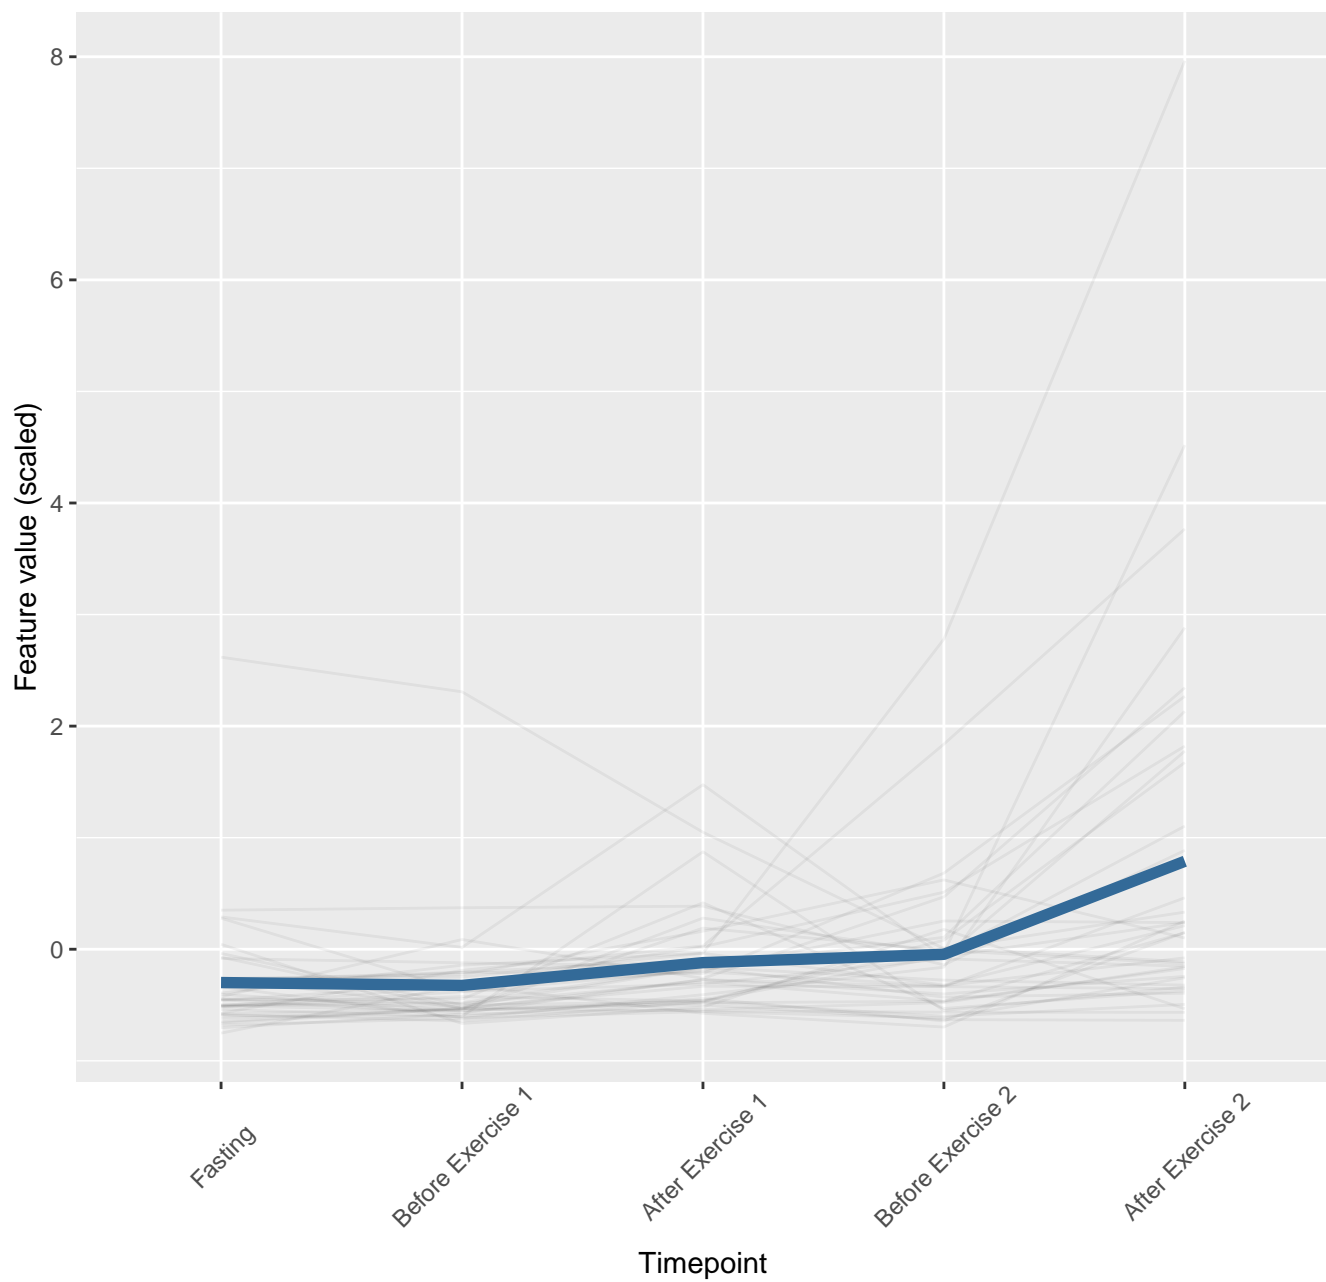

Line plot of TG(56:2)

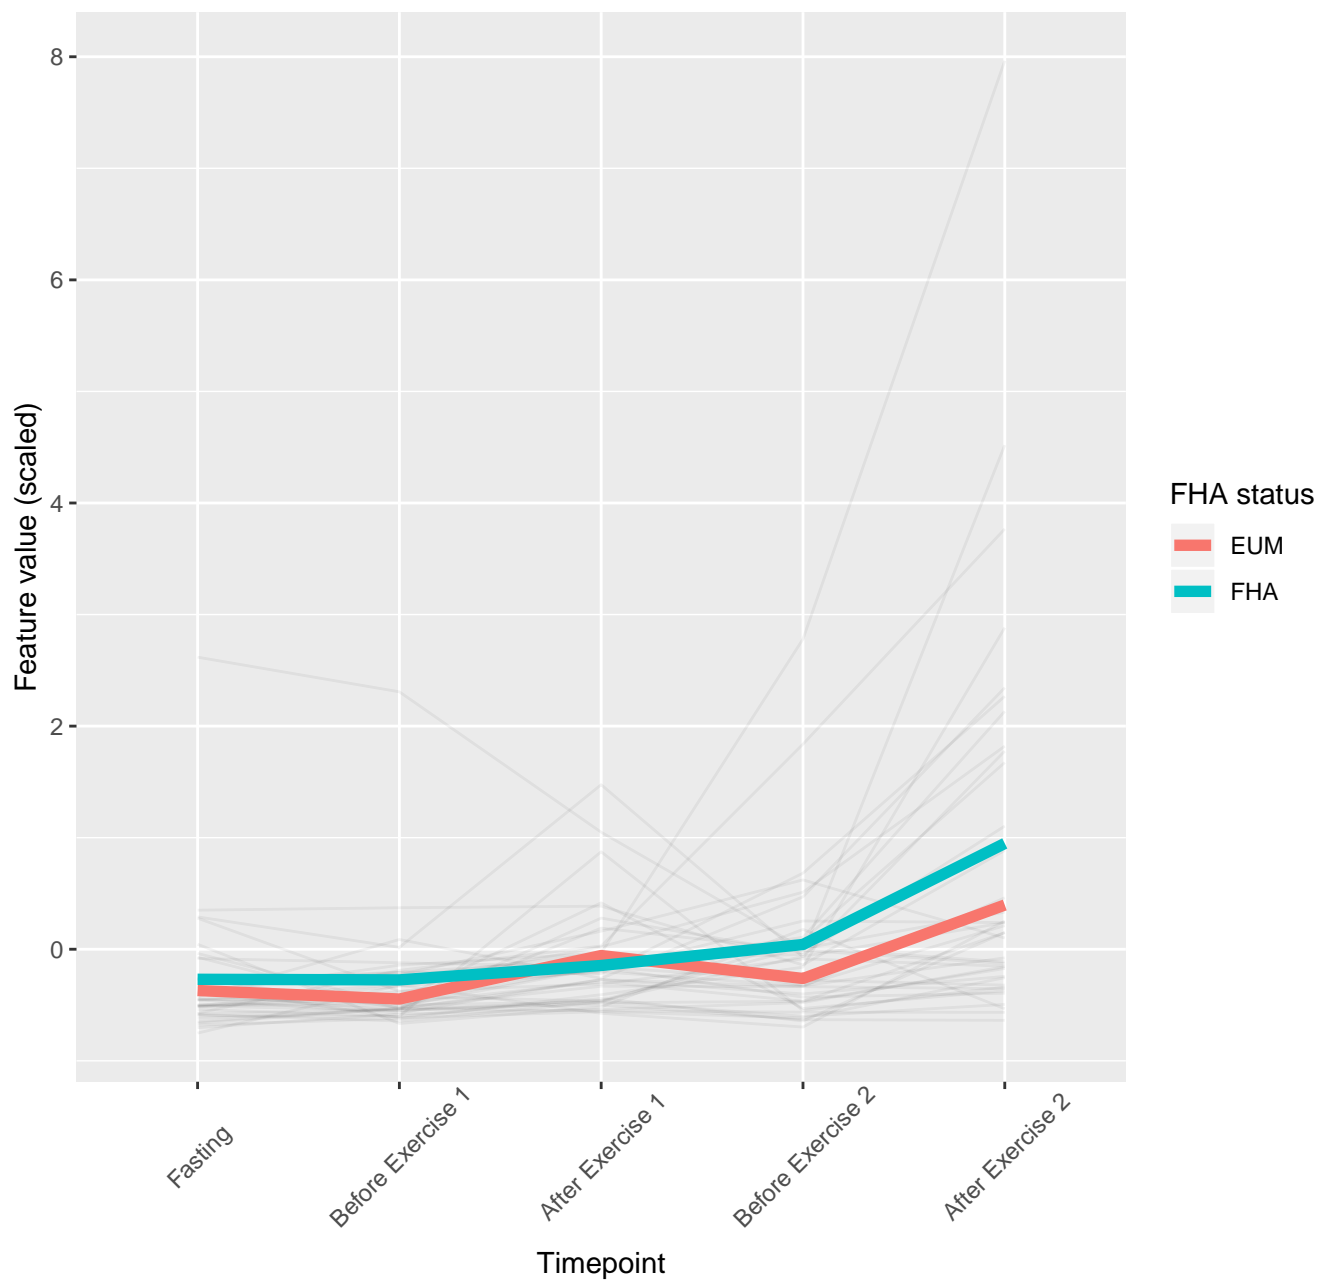

Line plot of TG(56:2)

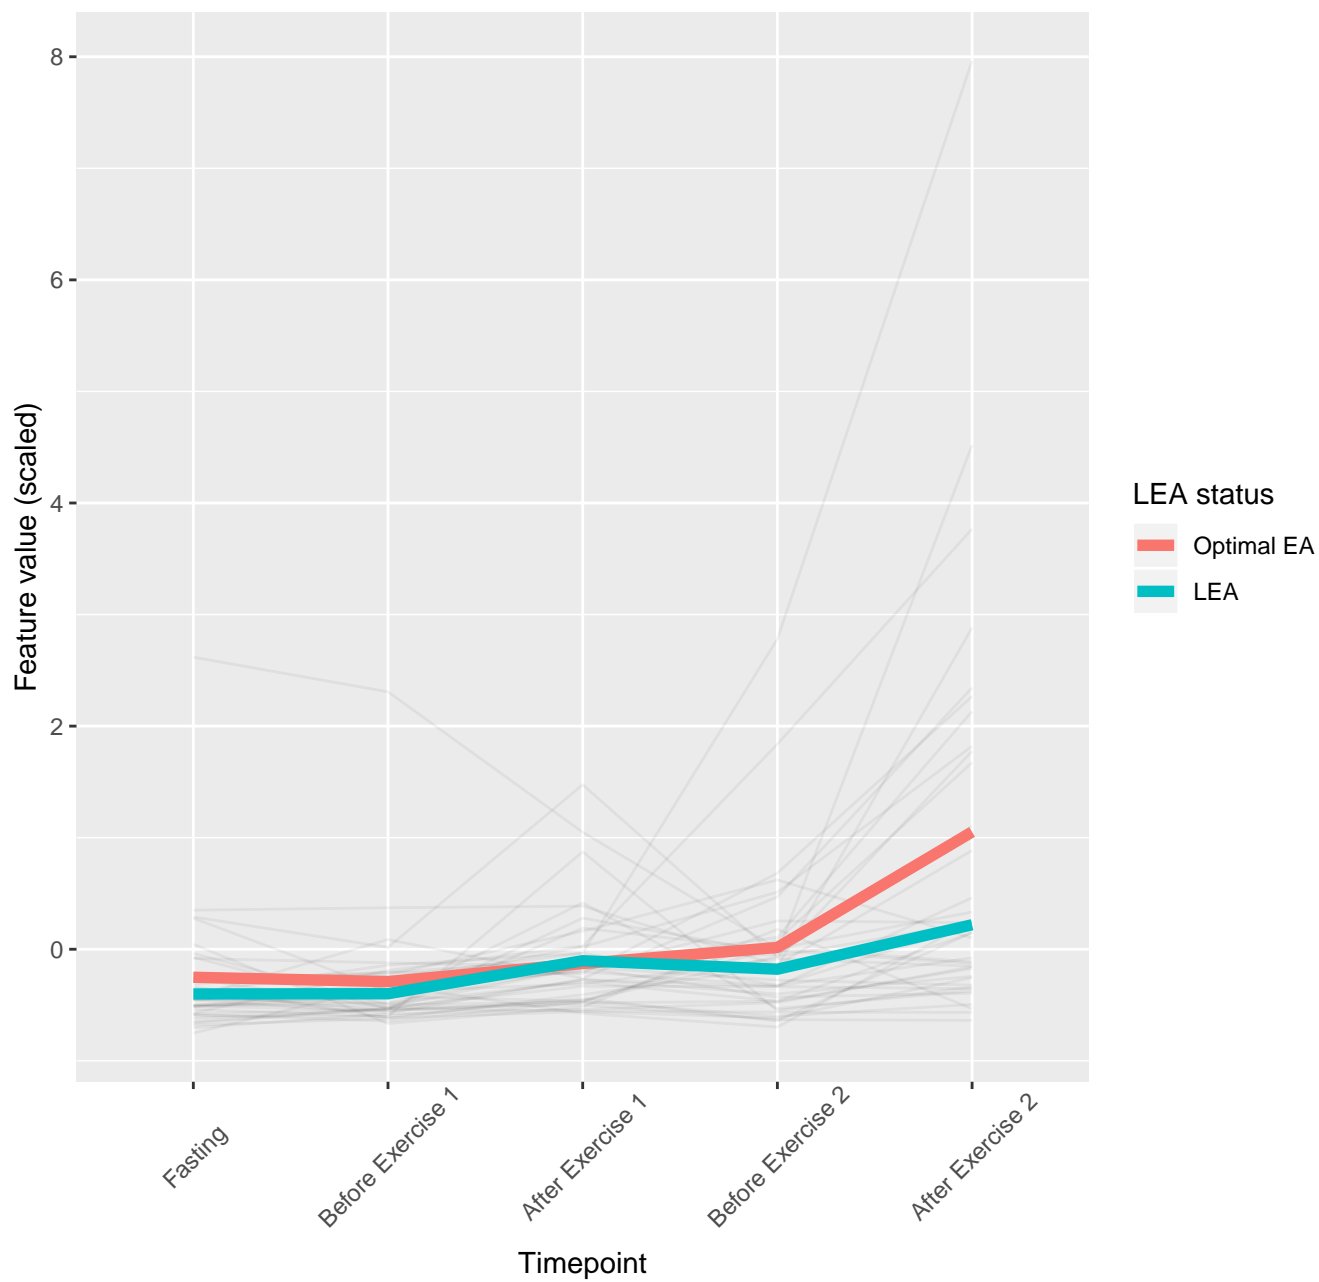

Line plot of TG(56:3)

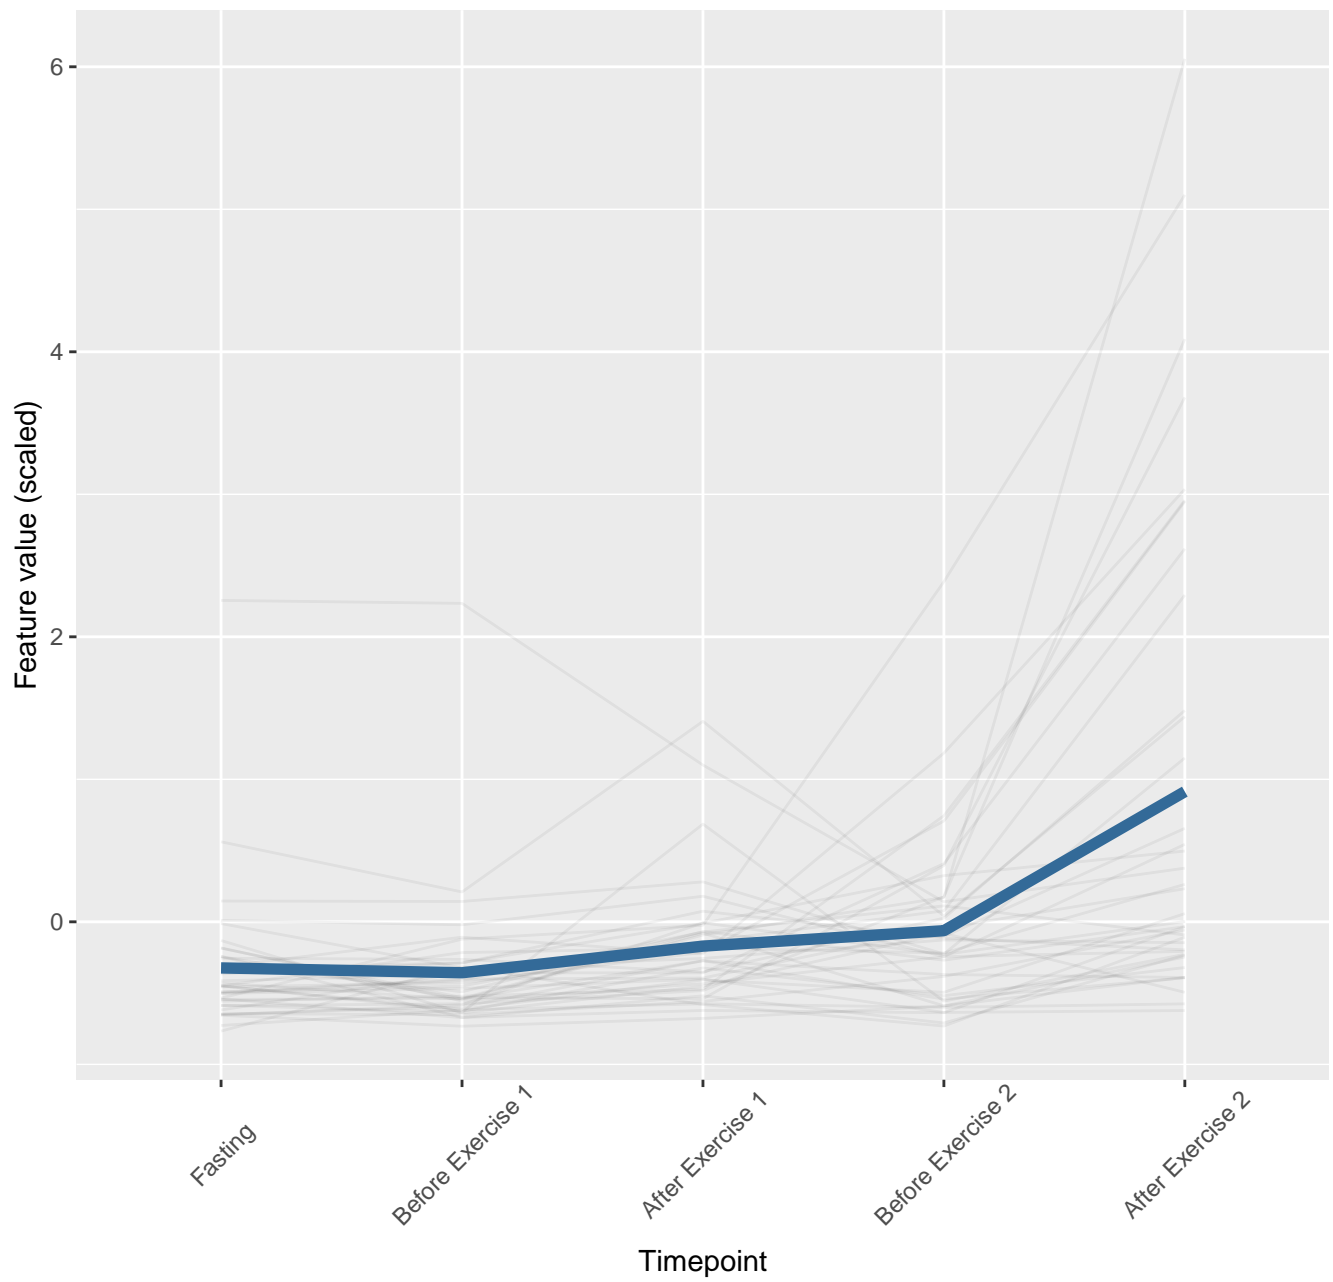

Line plot of TG(56:3)

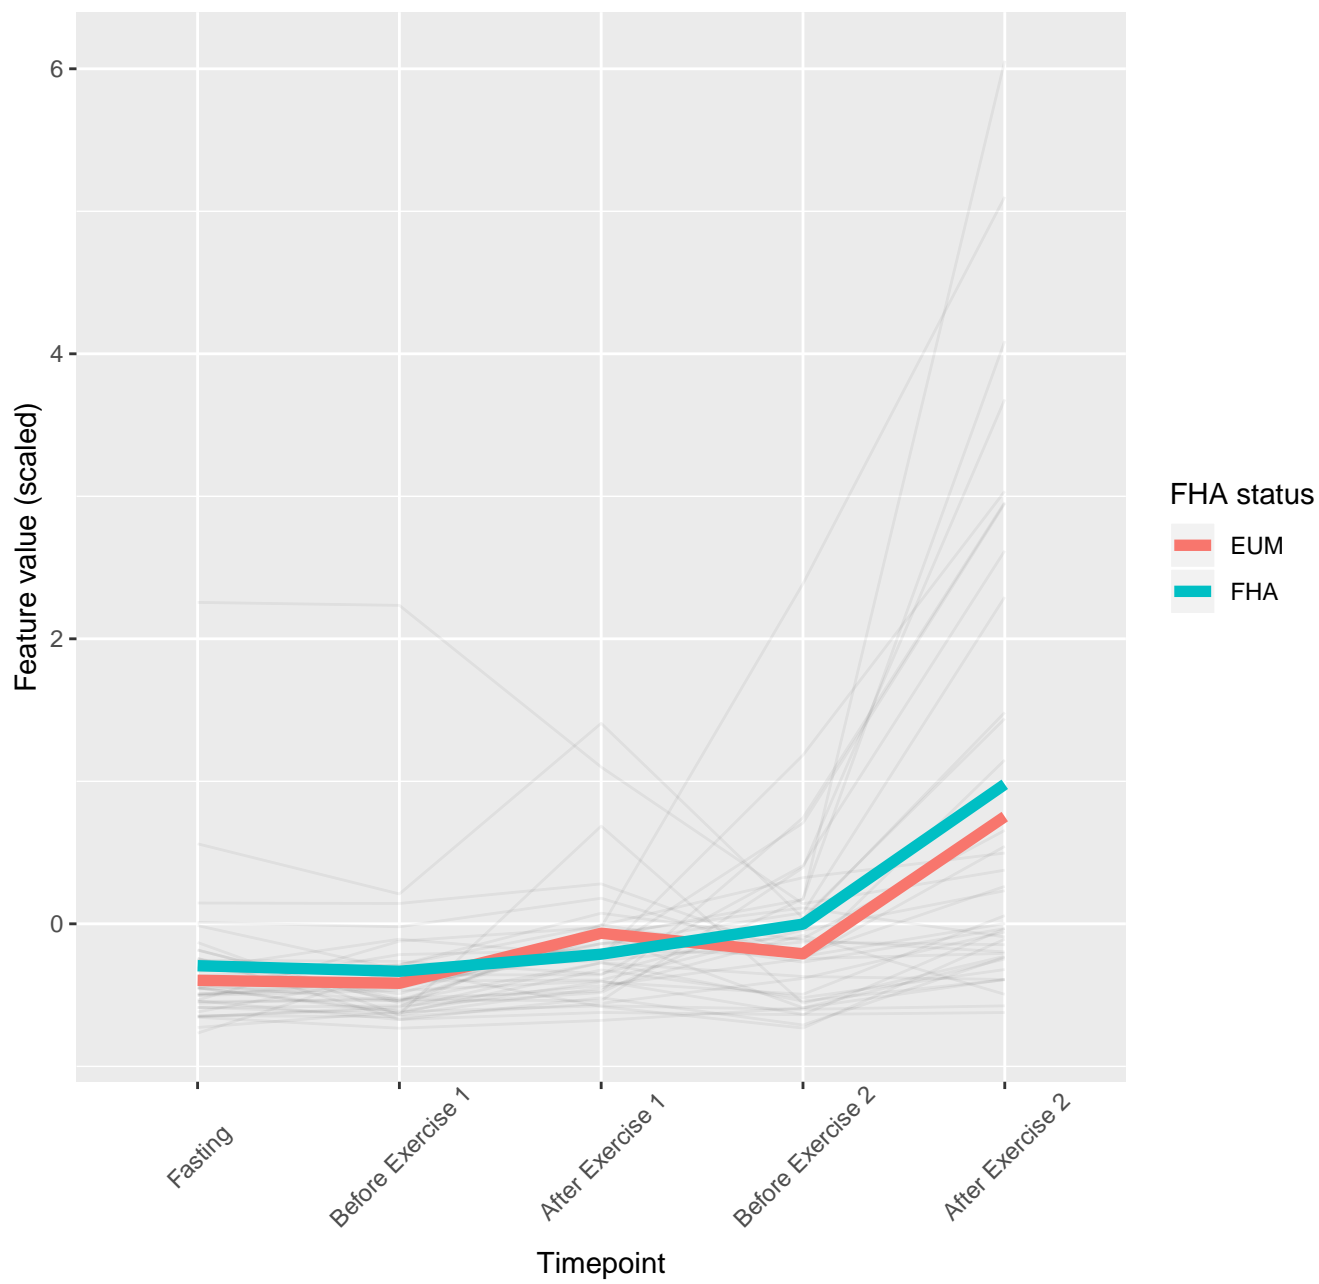



Line plot of TG(56:3)

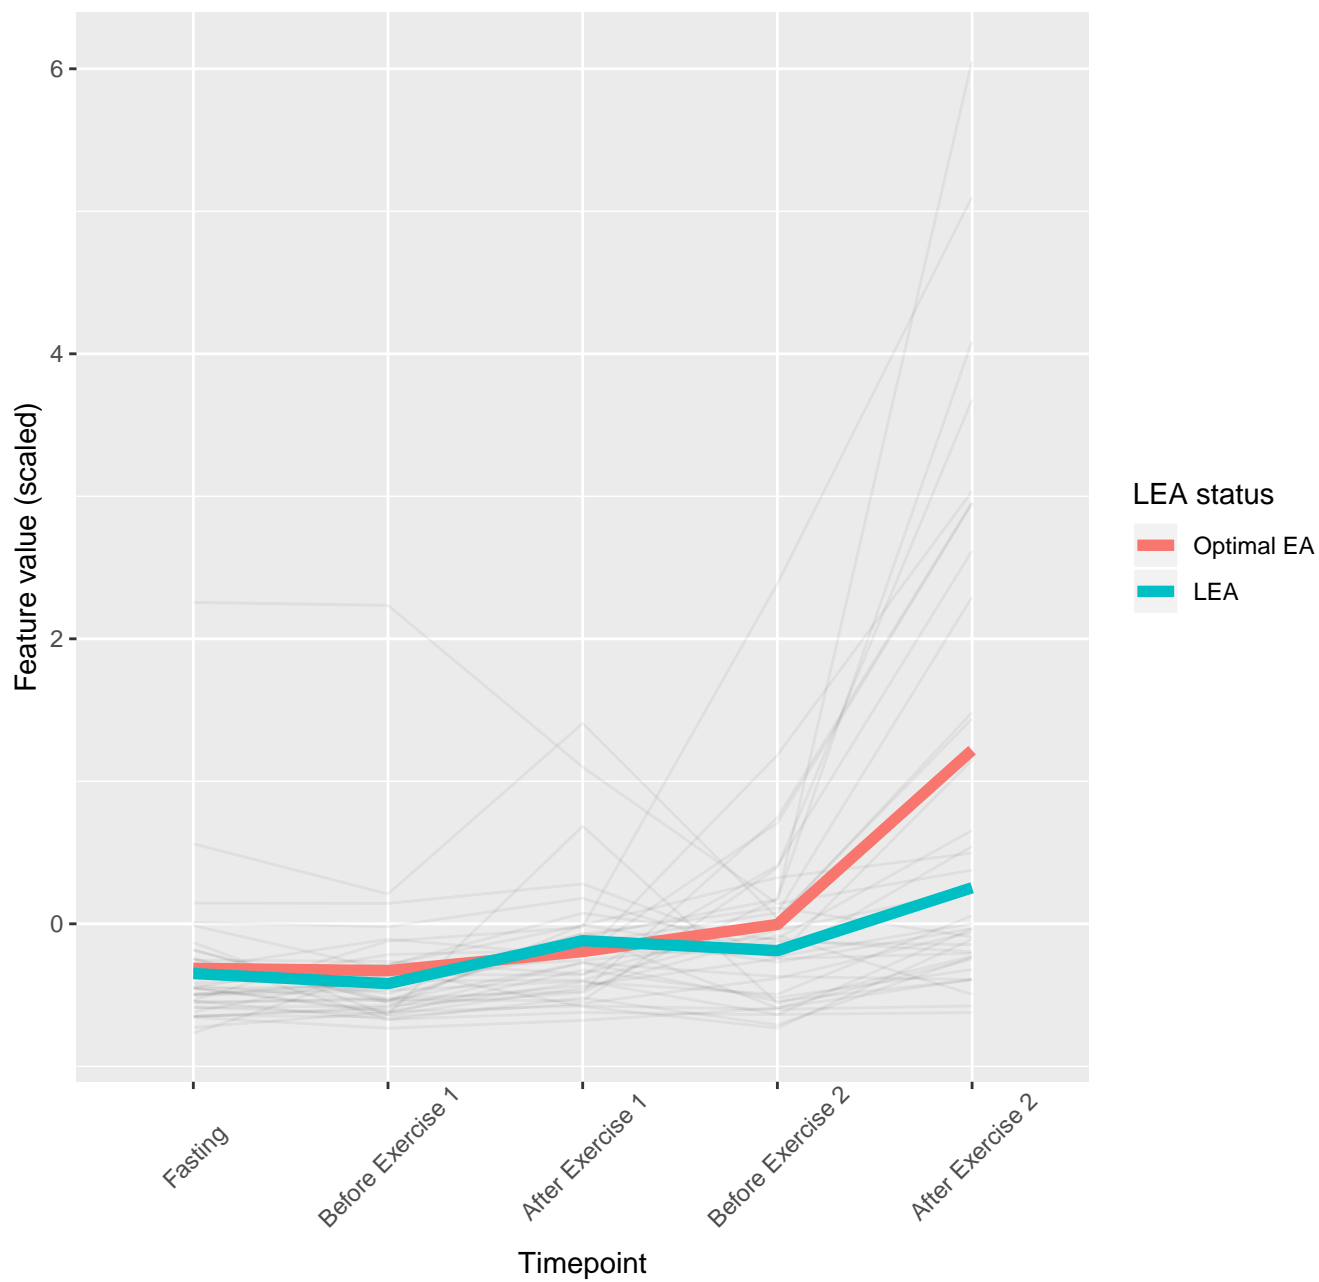

Line plot of TG(56:4)

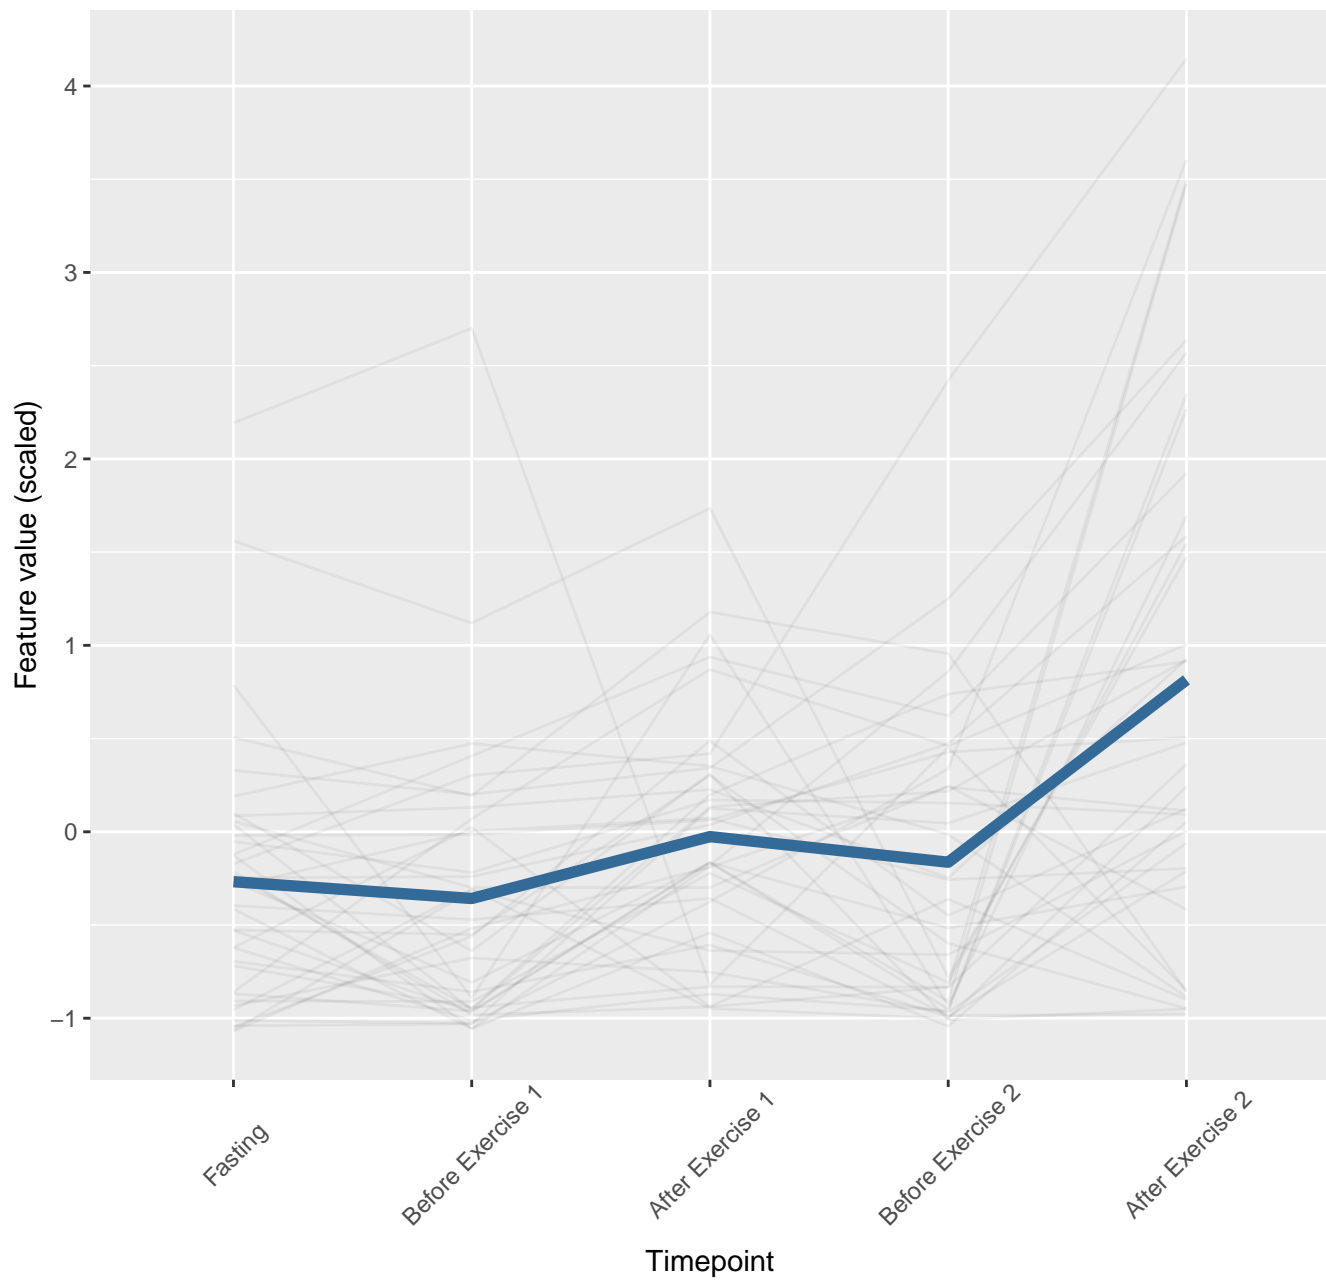

Line plot of TG(56:4)

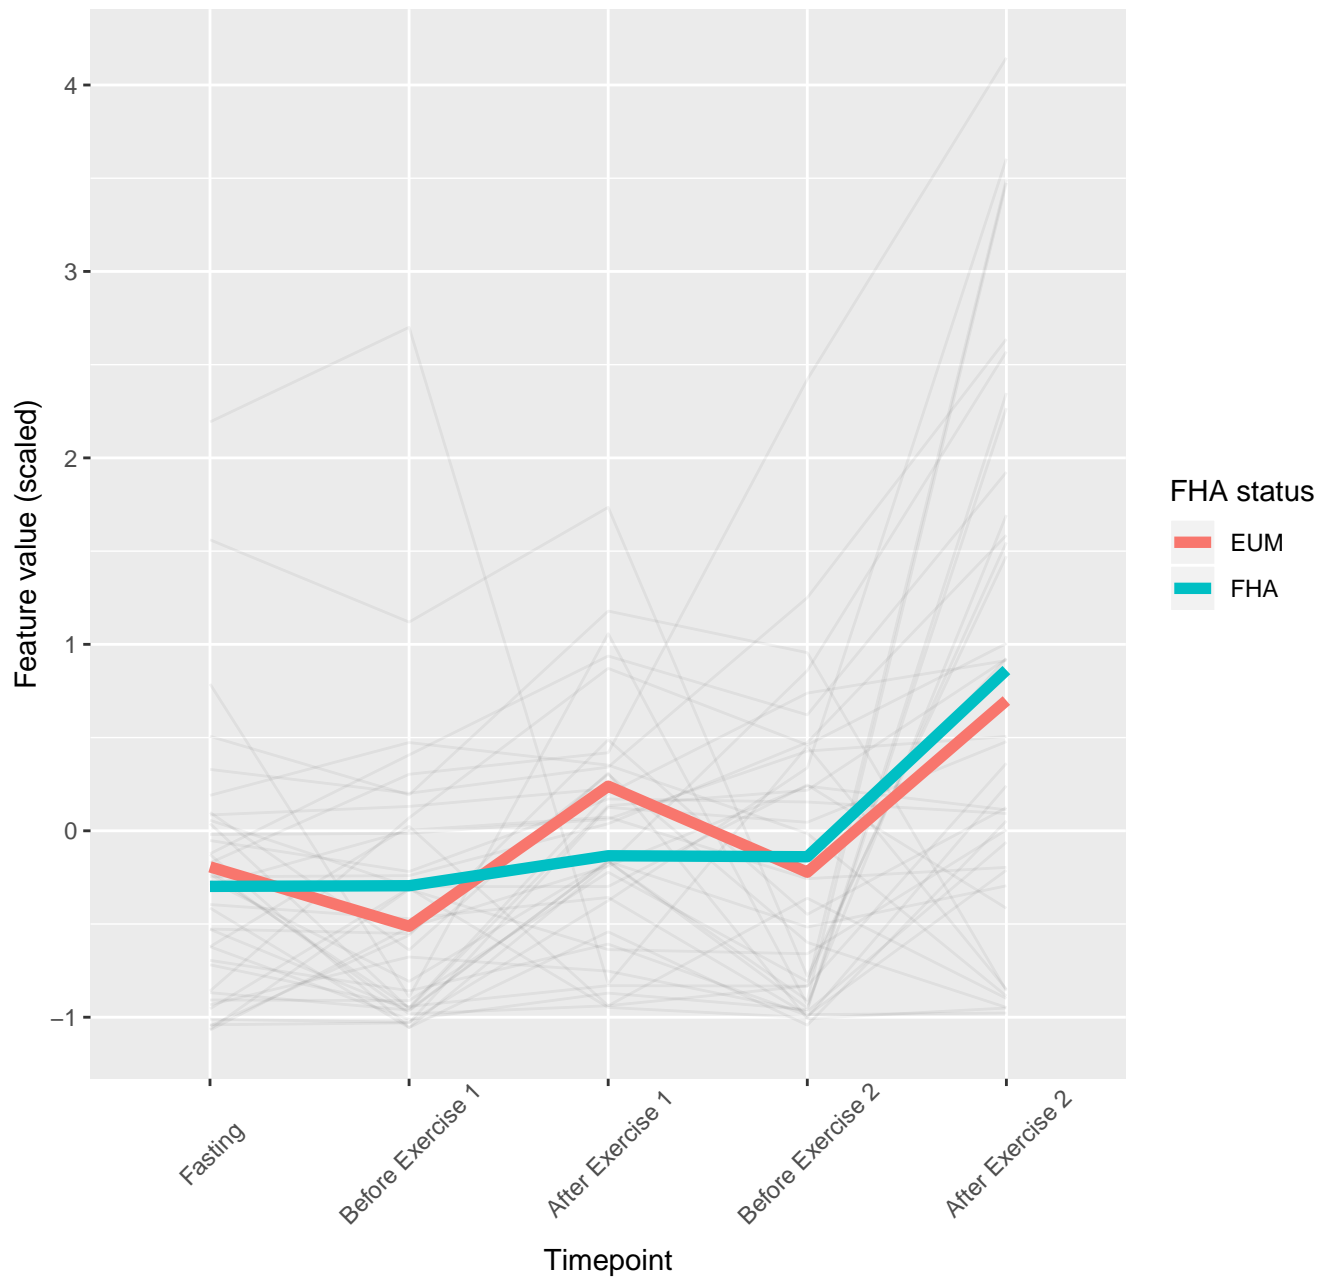

Line plot of TG(56:4)

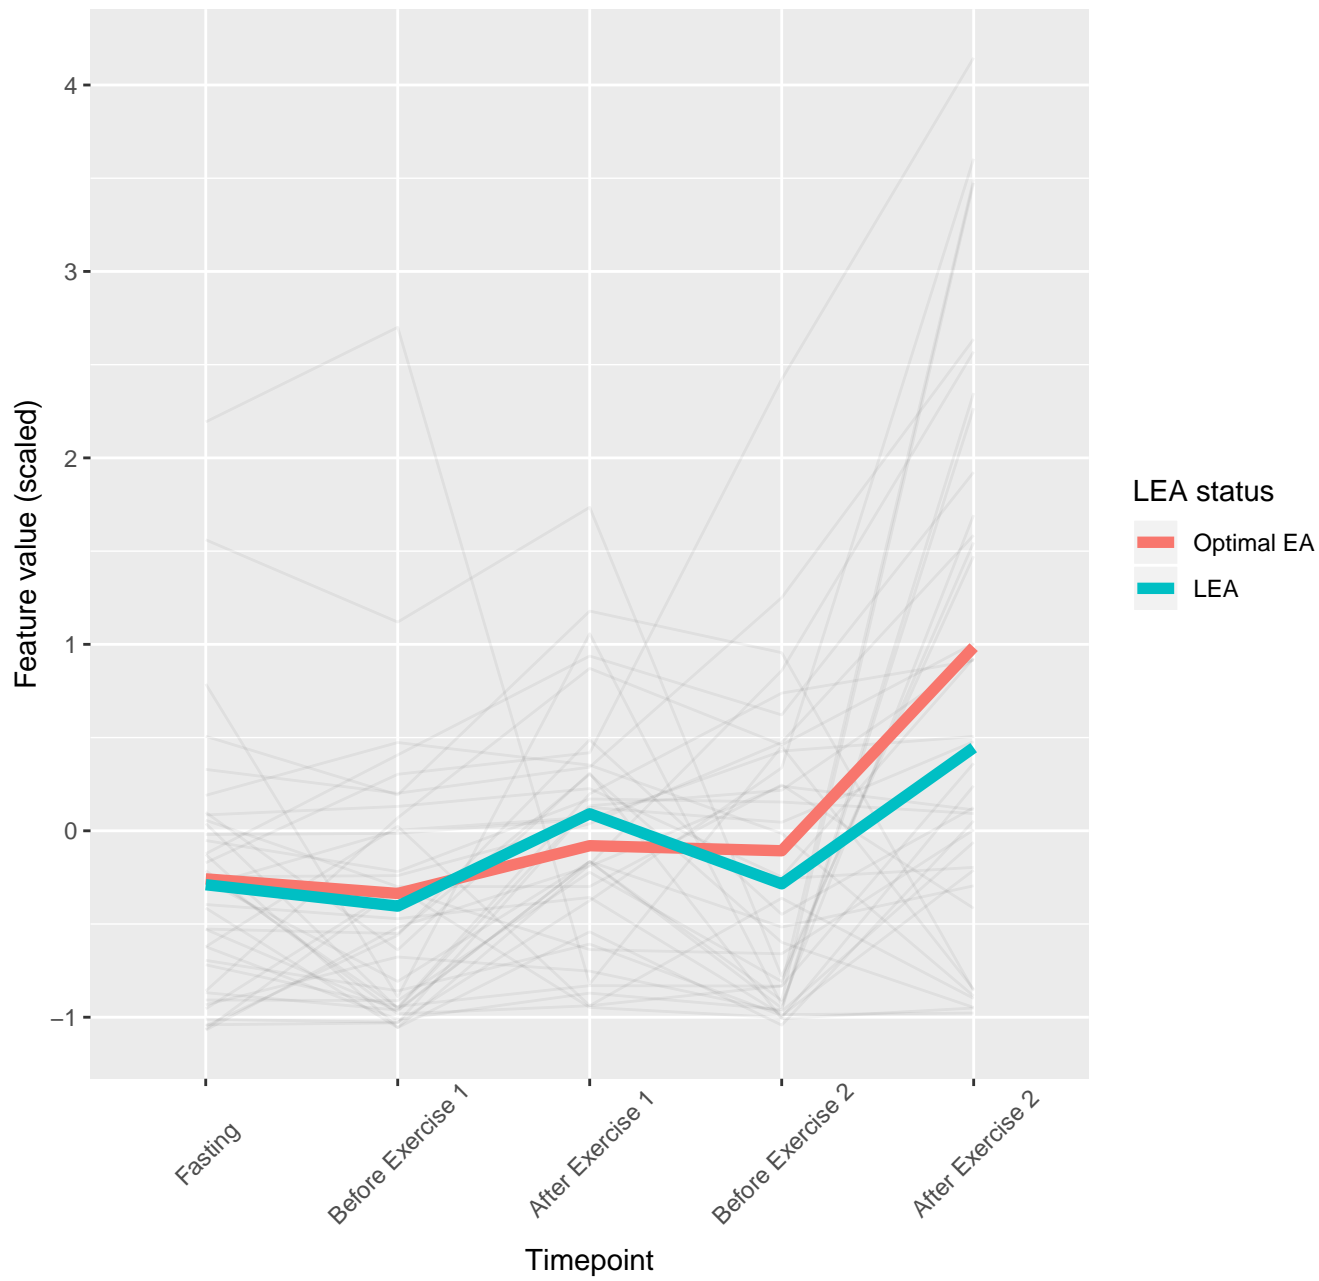

Line plot of TG(56:5)

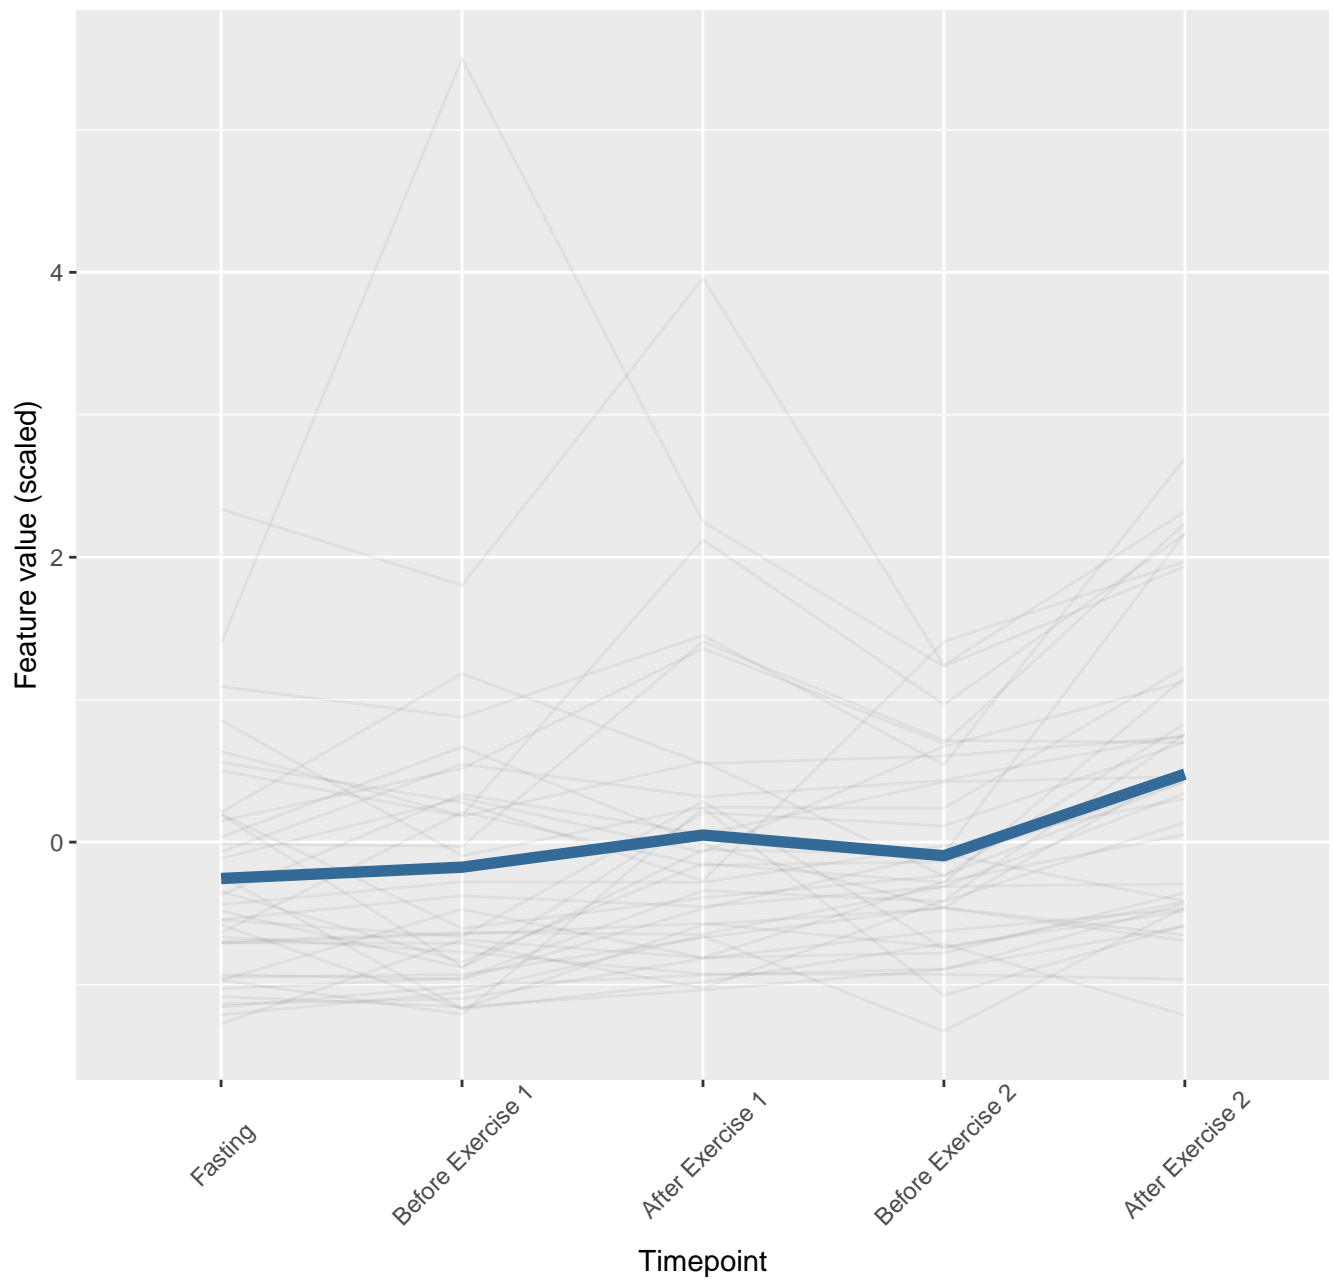

Line plot of TG(56:5)

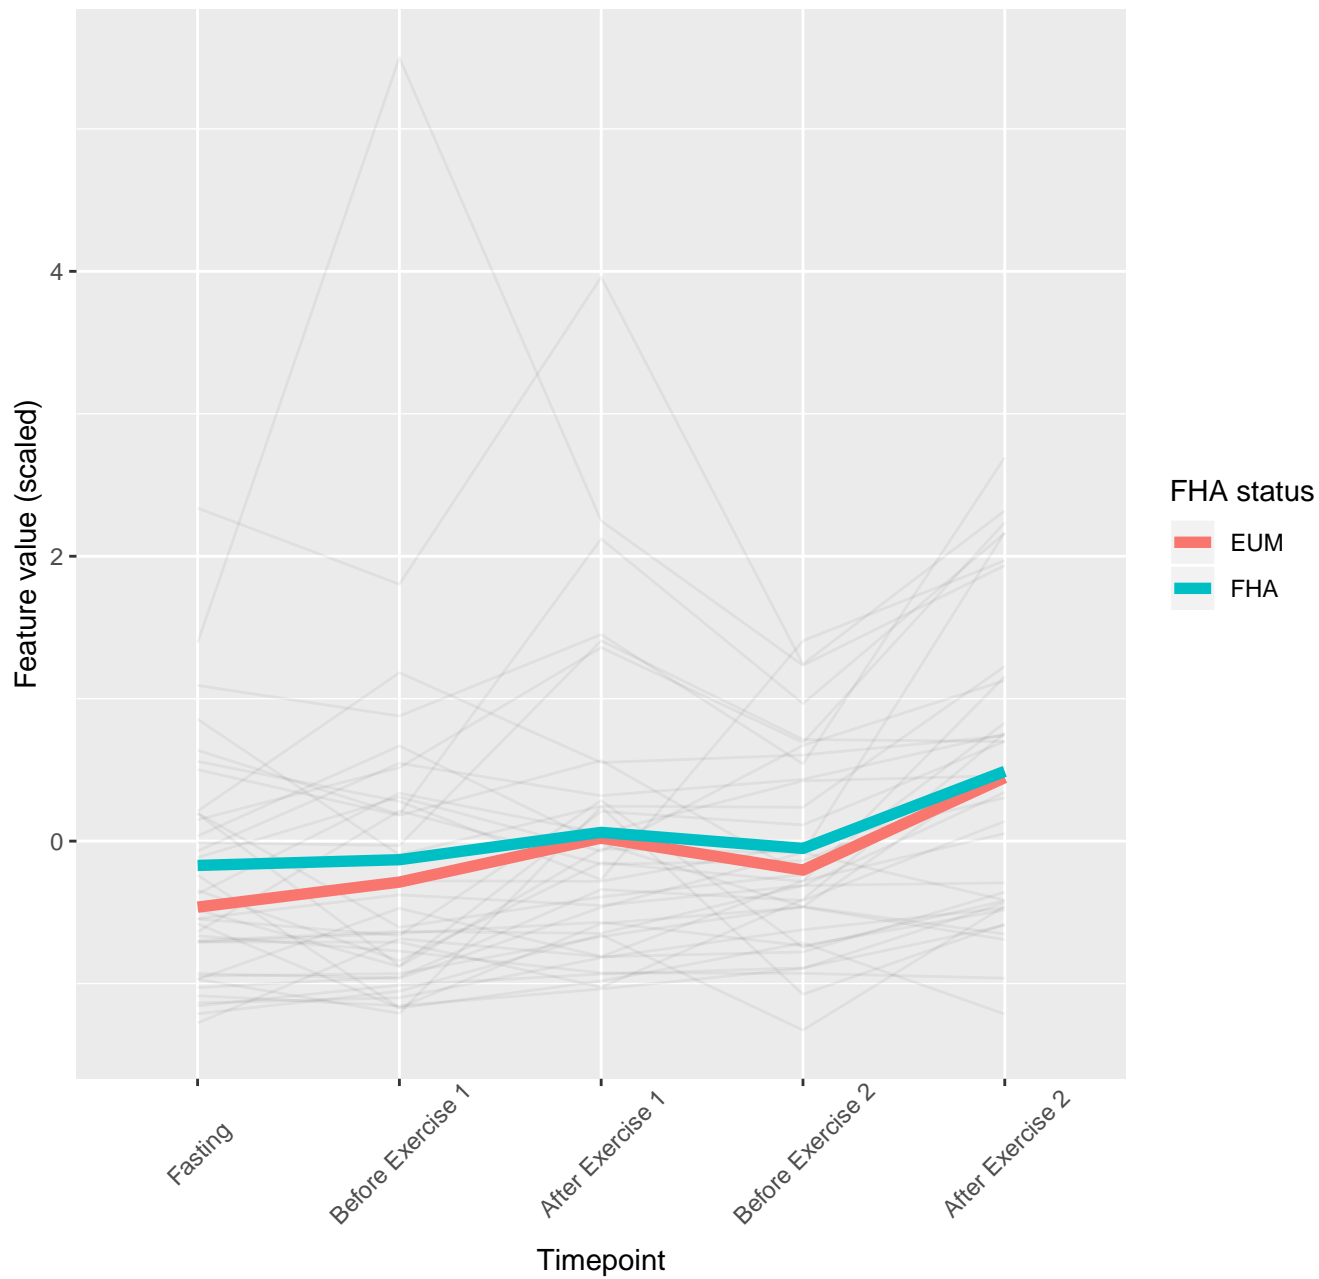

Line plot of TG(56:5)

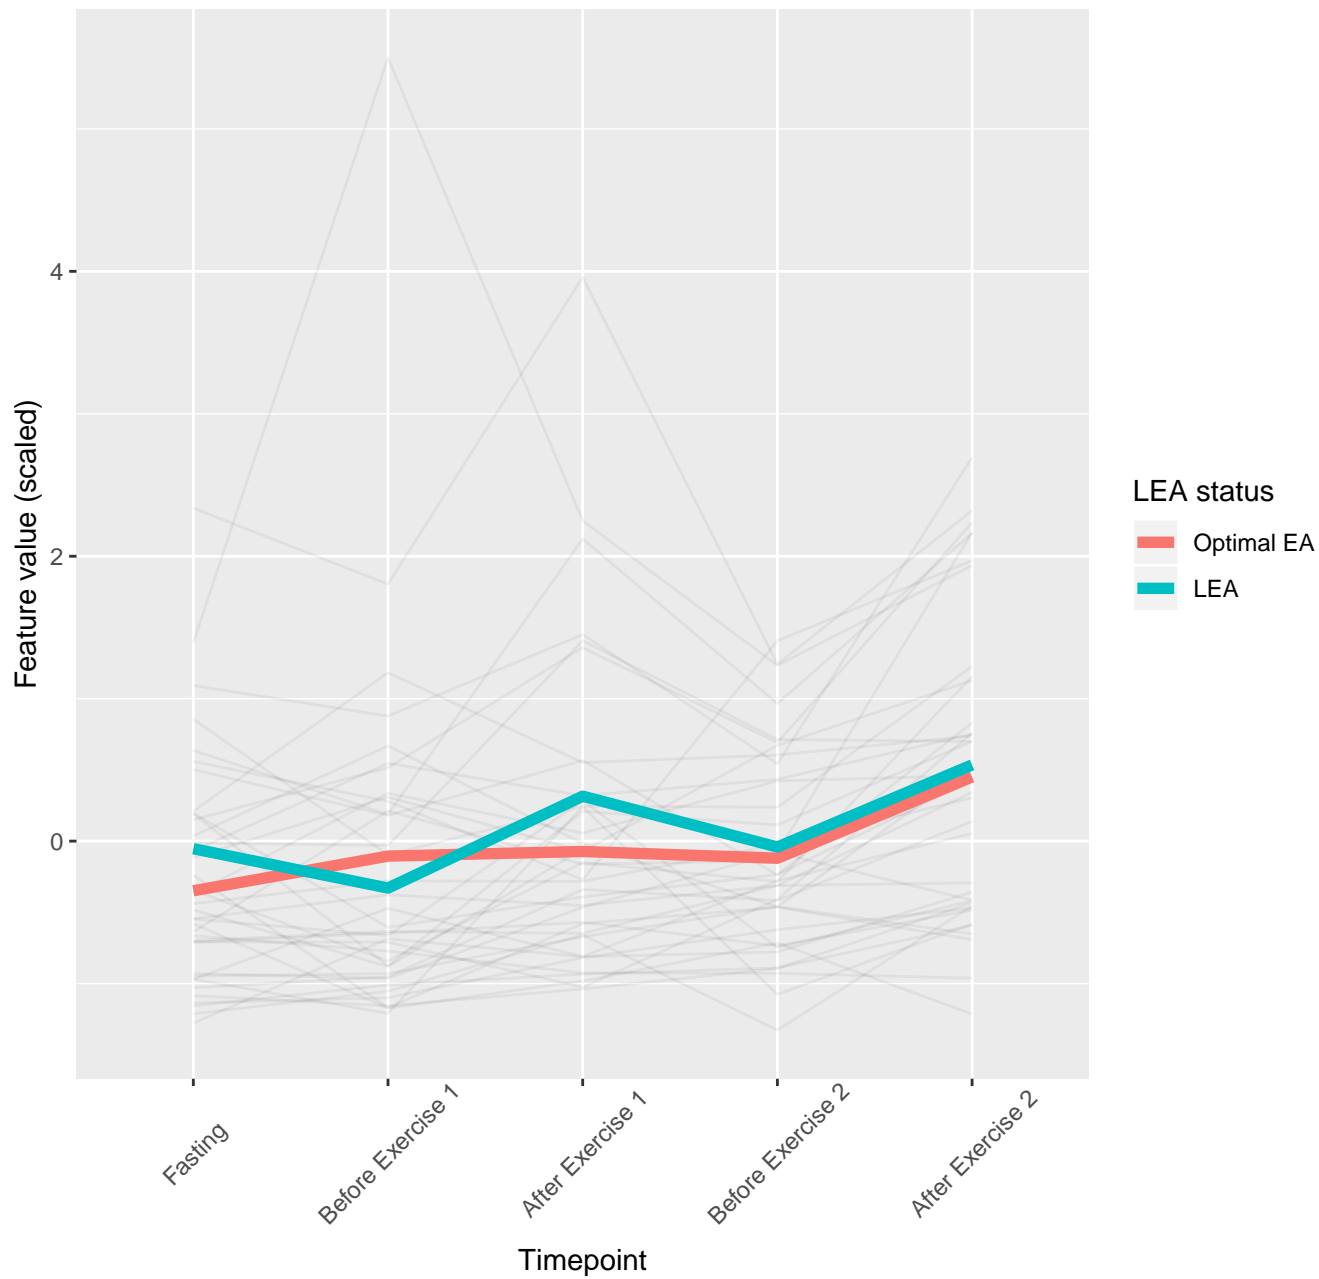

Line plot of TG(56:6)

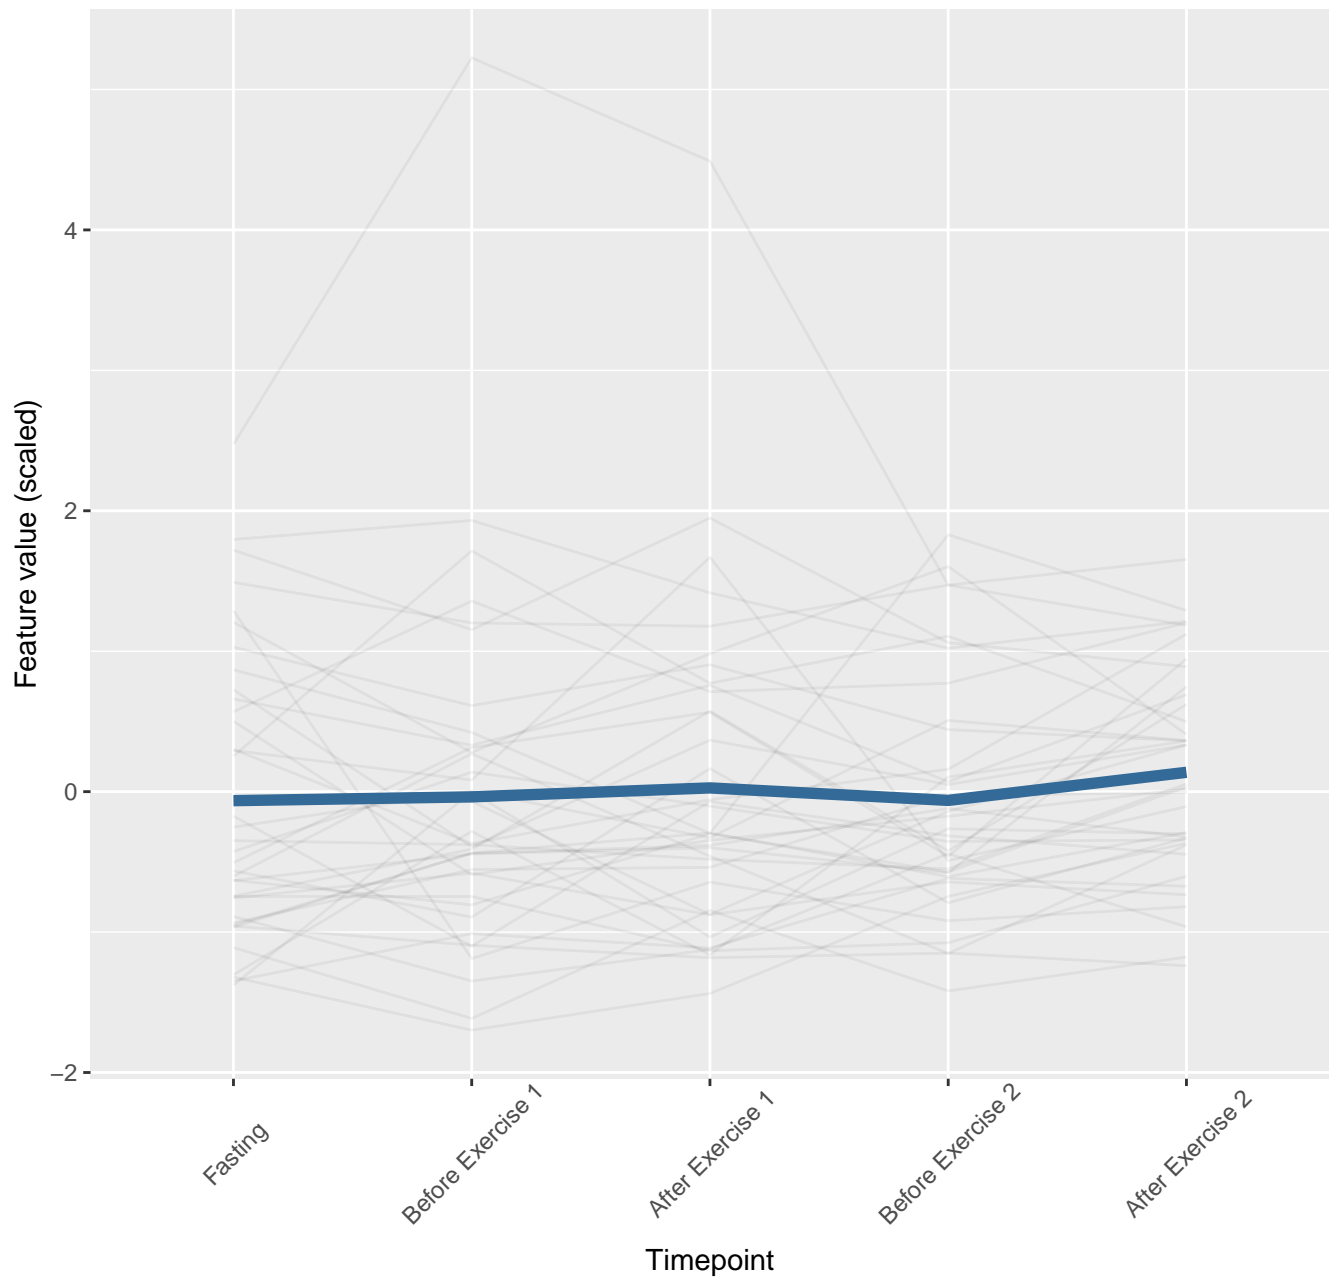



Line plot of TG(56:6)

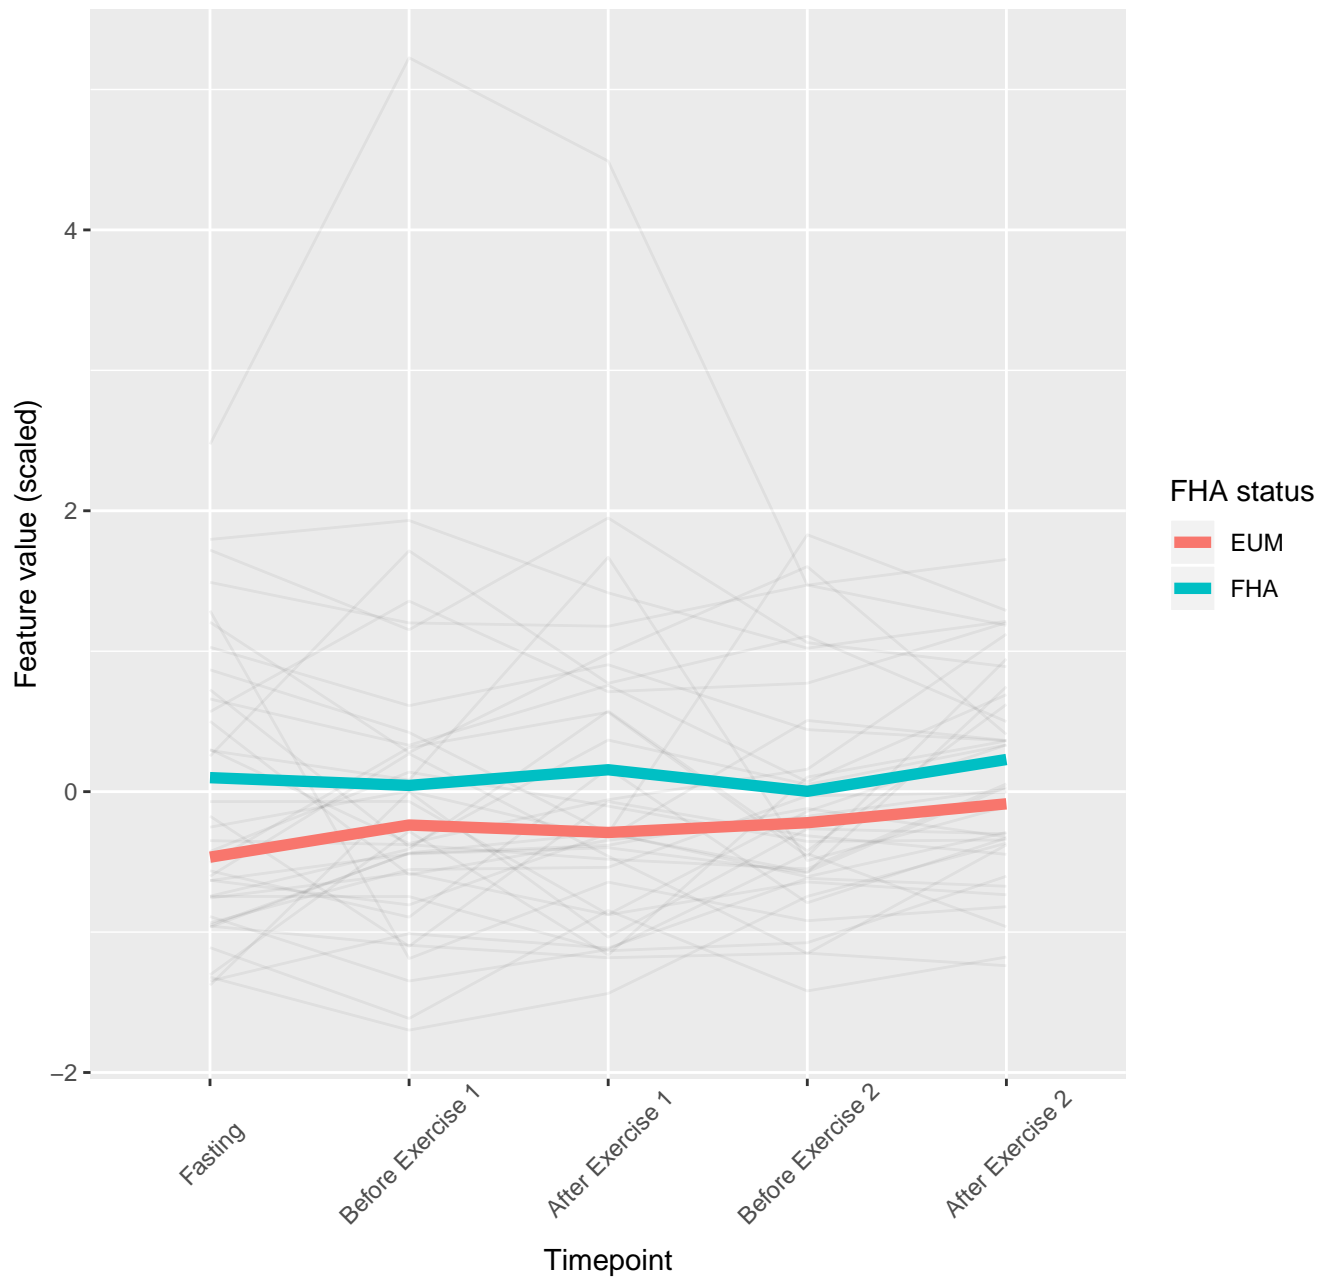

Line plot of TG(56:6)

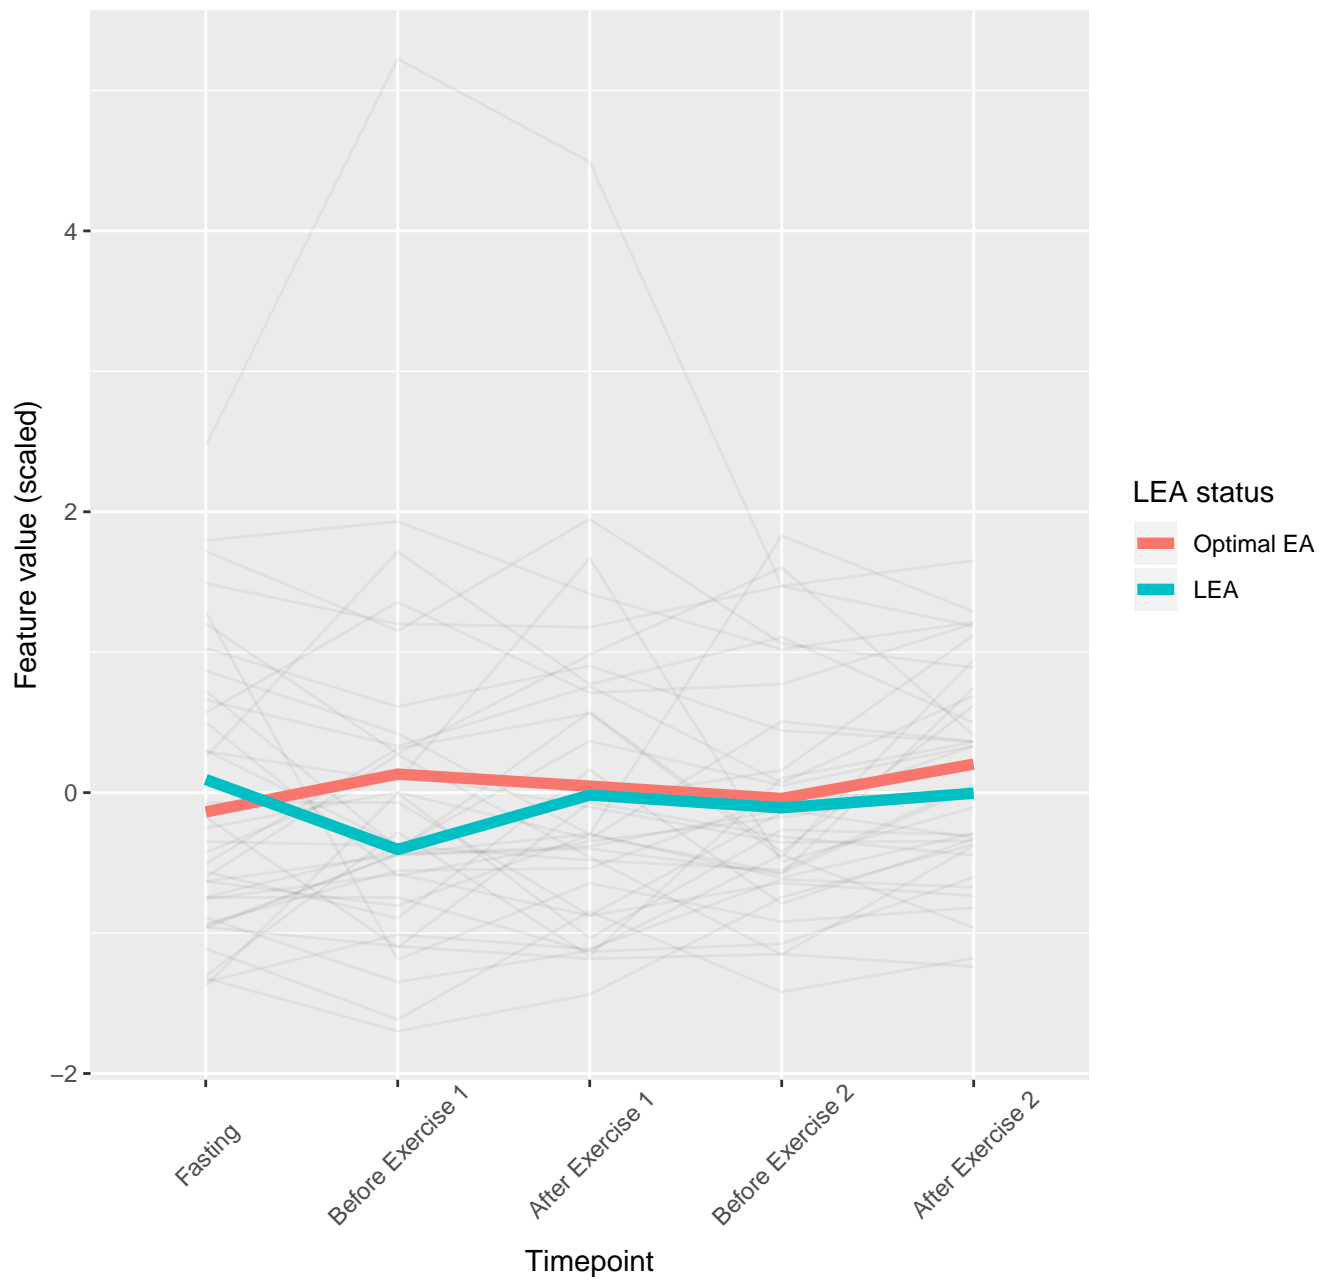

Line plot of TG(56:7)

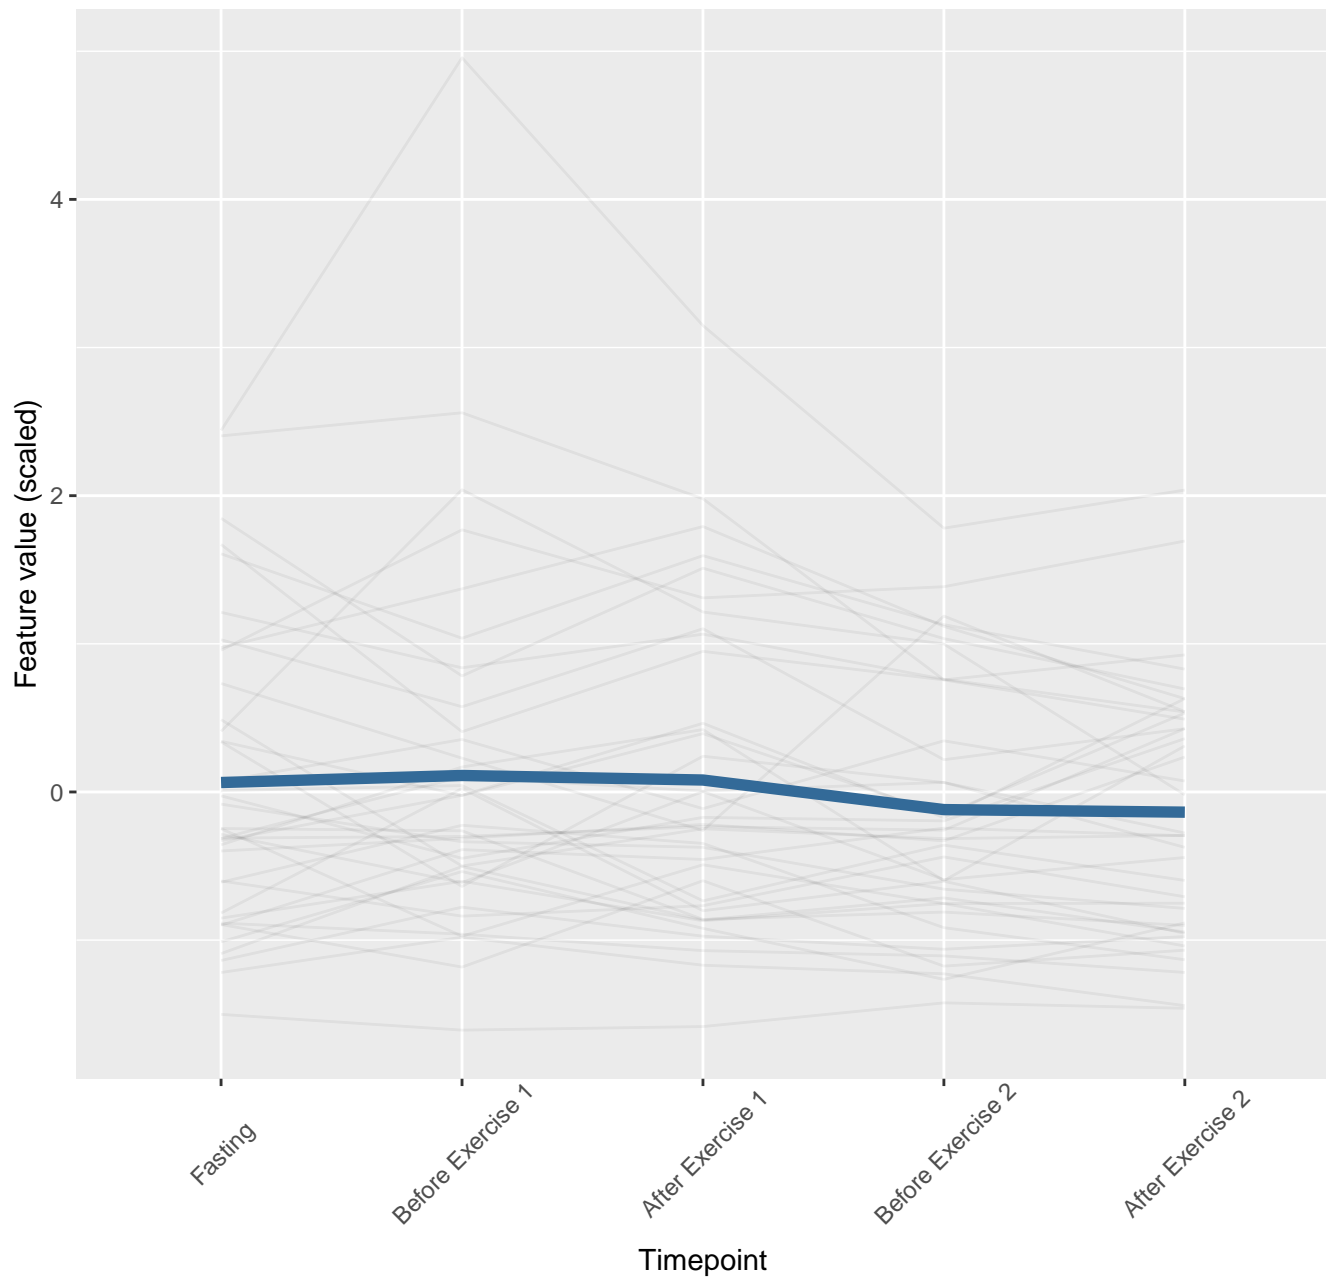

Line plot of TG(56:7)

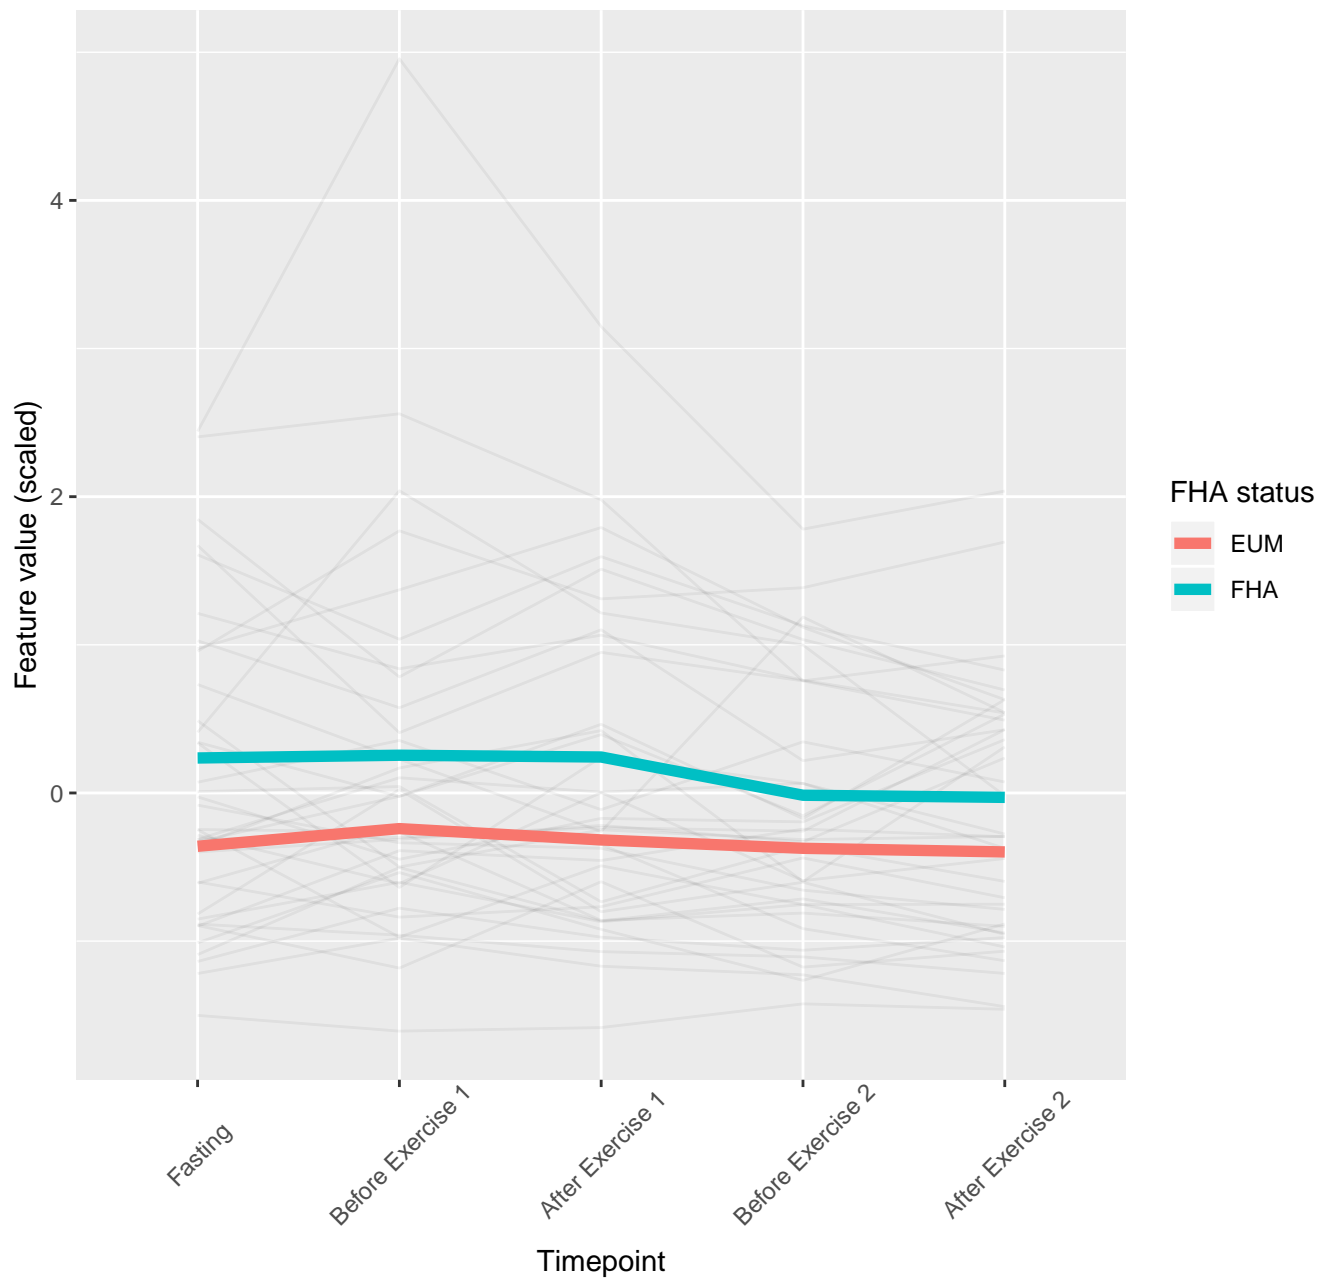

Line plot of TG(56:7)

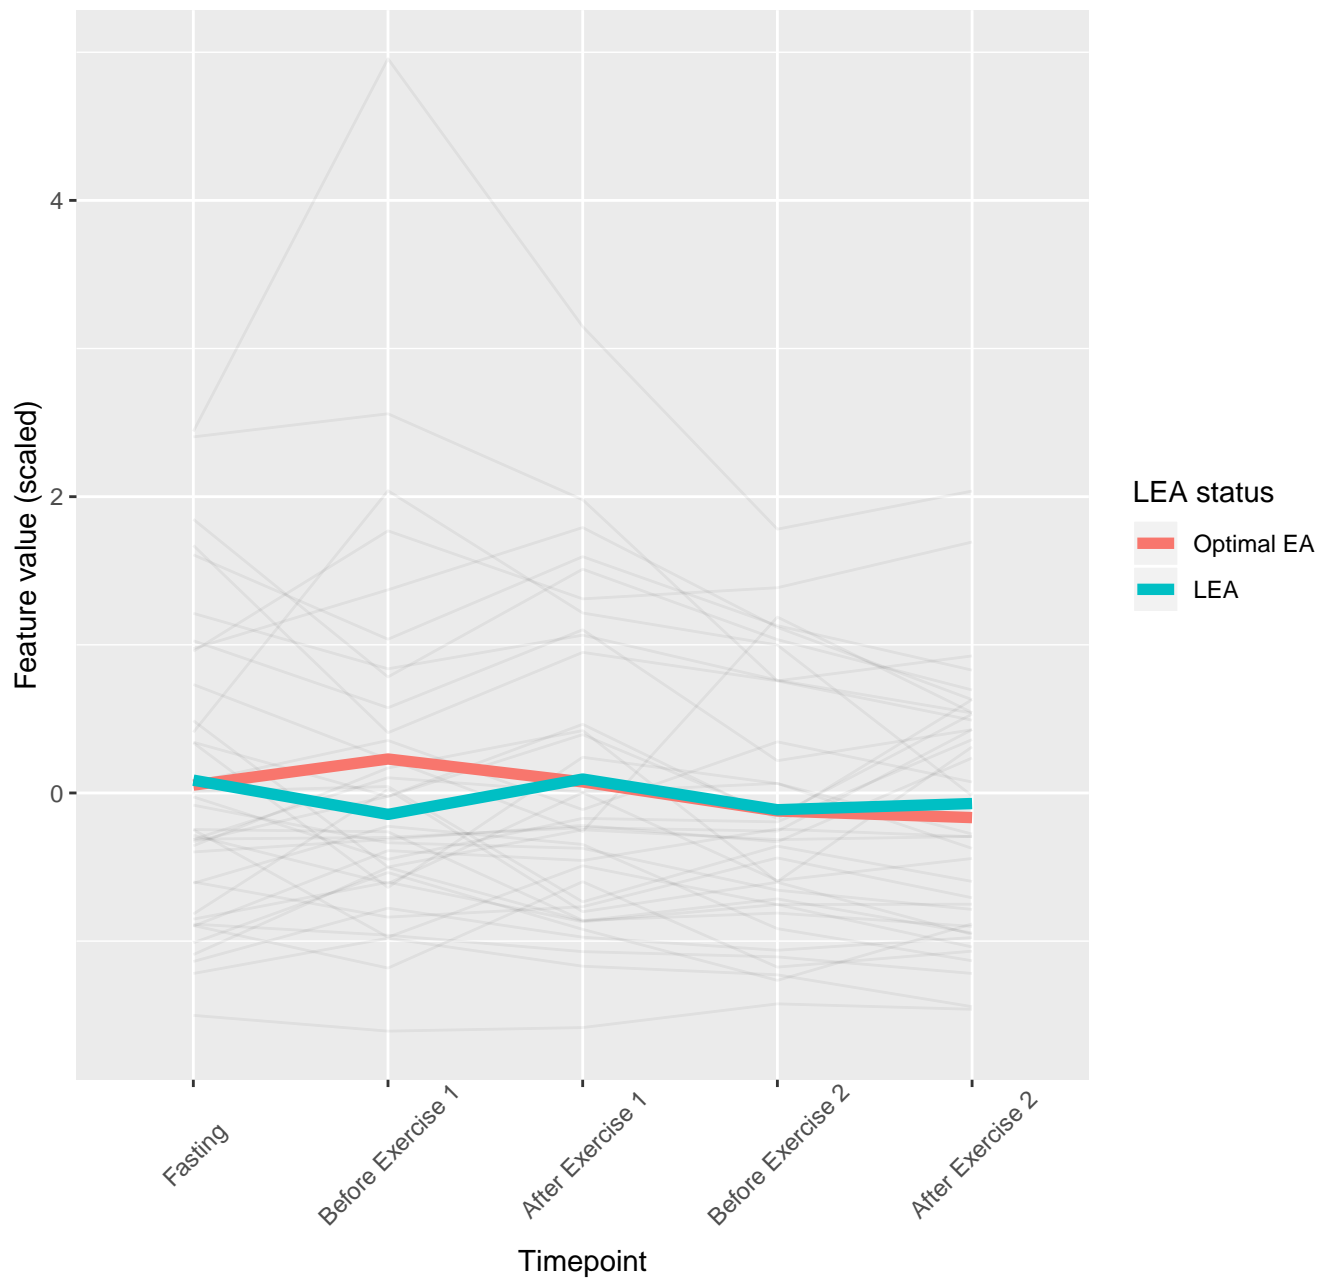

Line plot of TG(56:8)

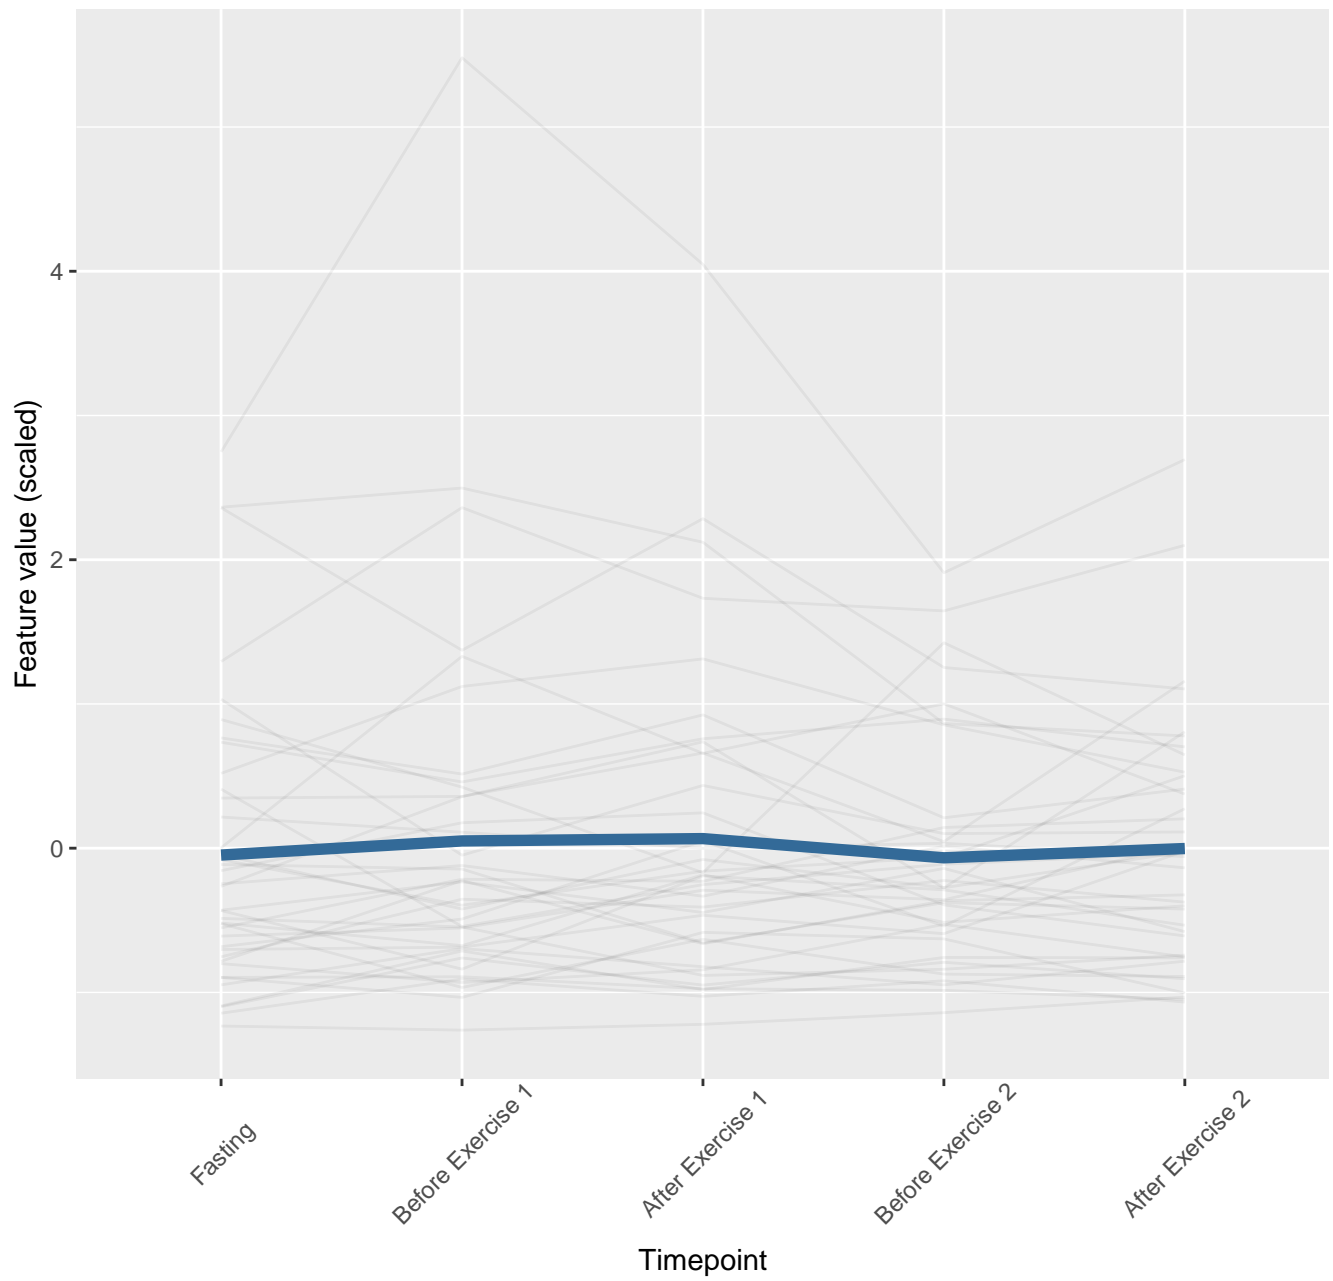

Line plot of TG(56:8)

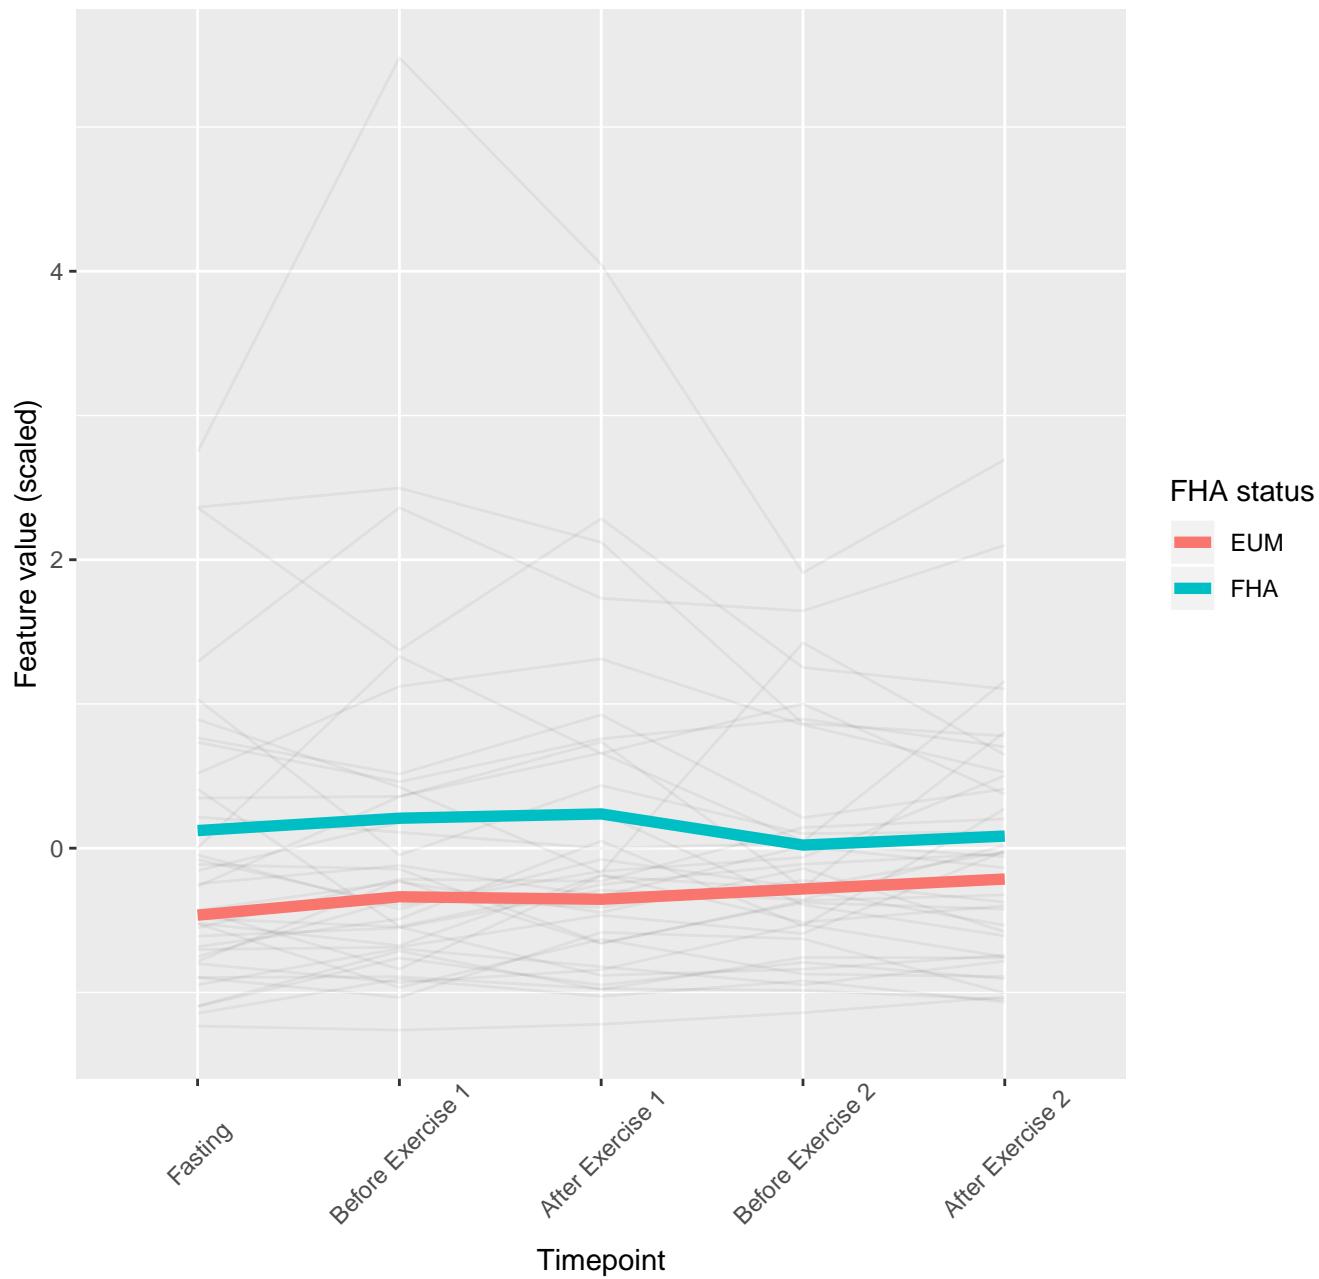

Line plot of TG(56:8)

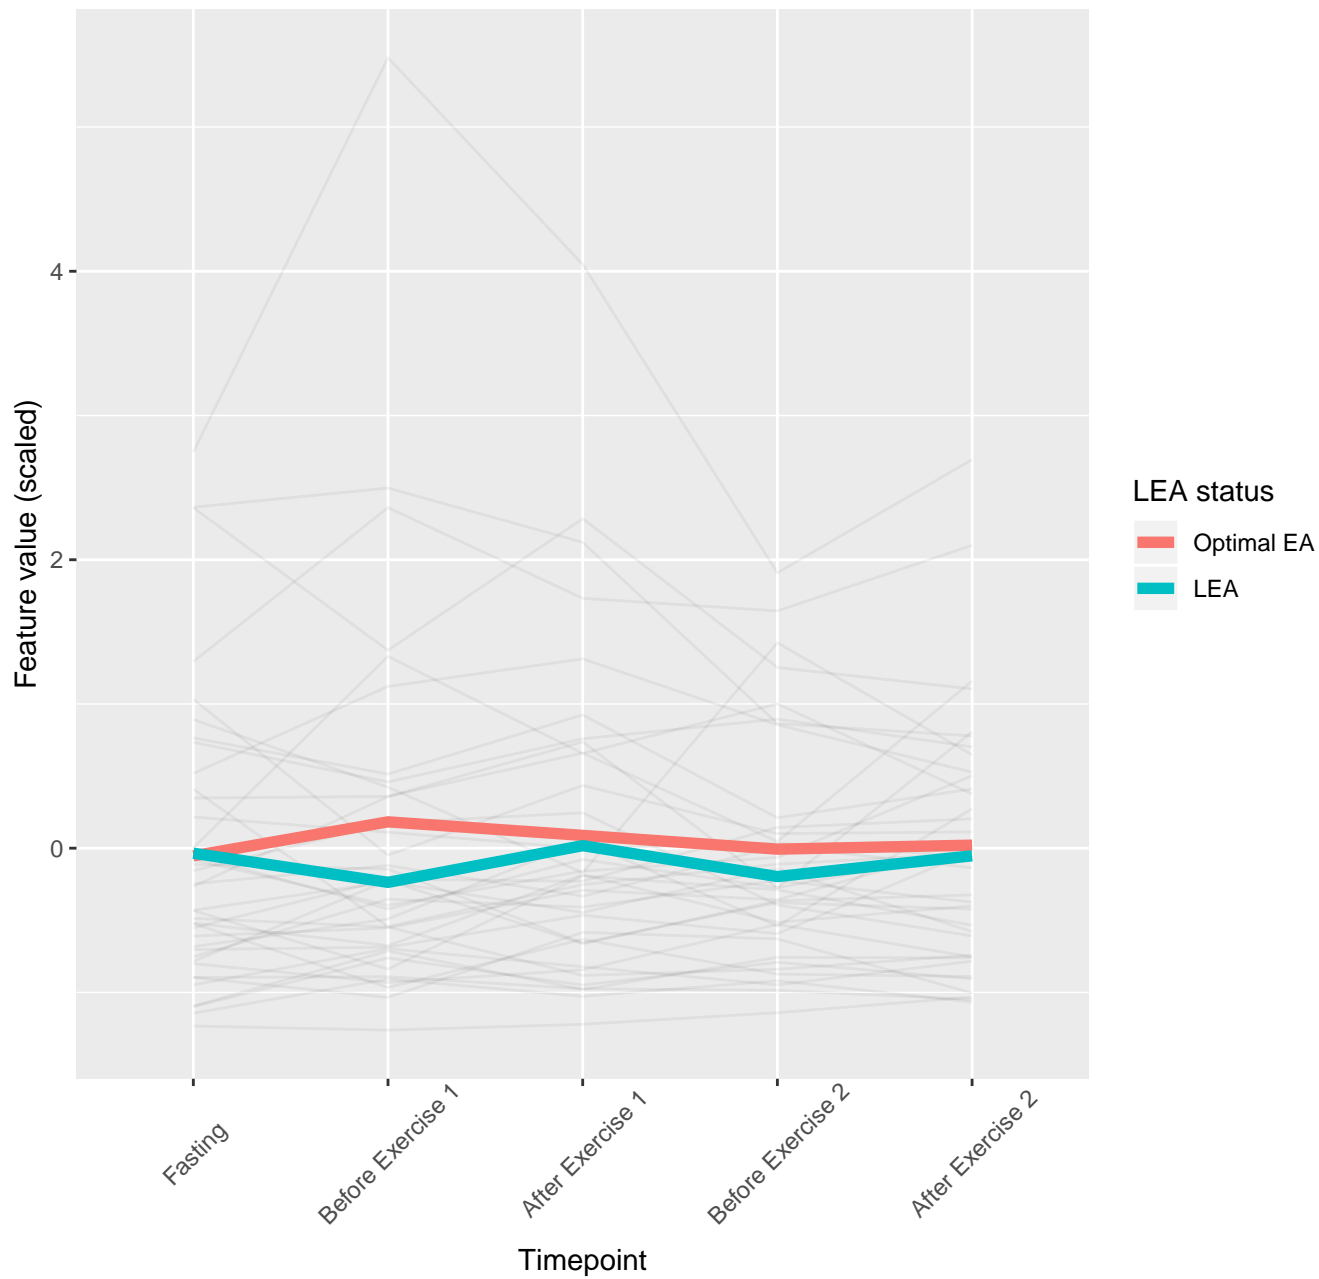



Line plot of TG(56:9)

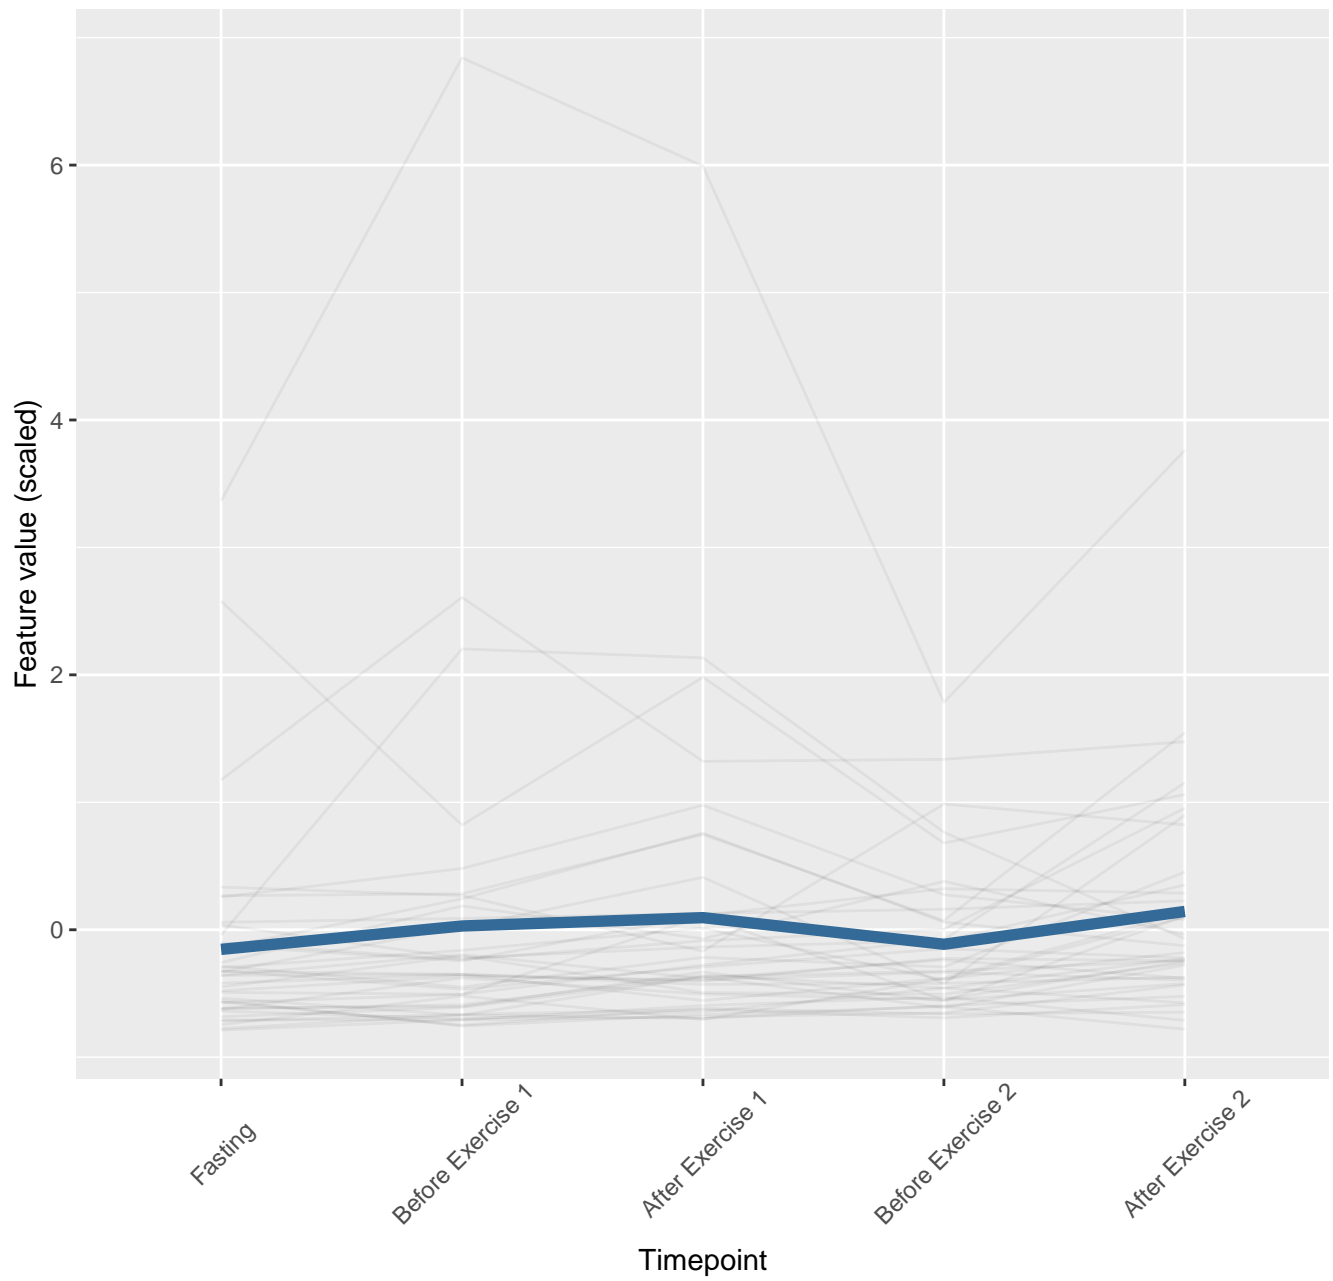

Line plot of TG(56:9)

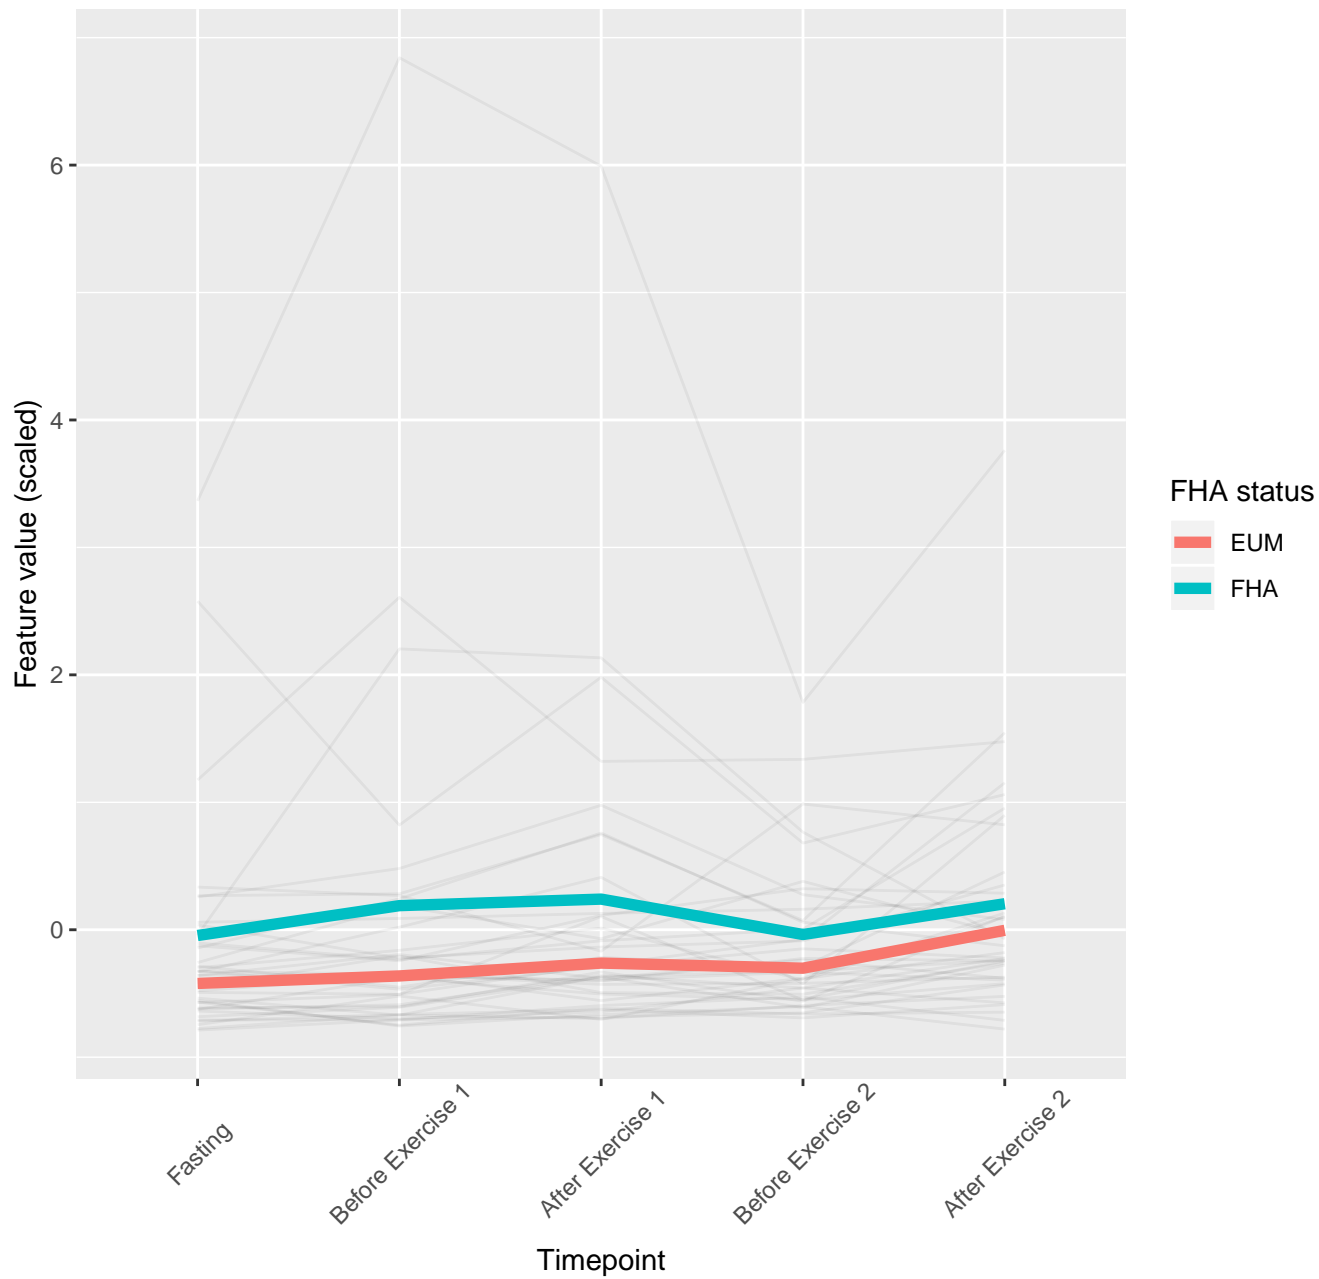

Line plot of TG(56:9)

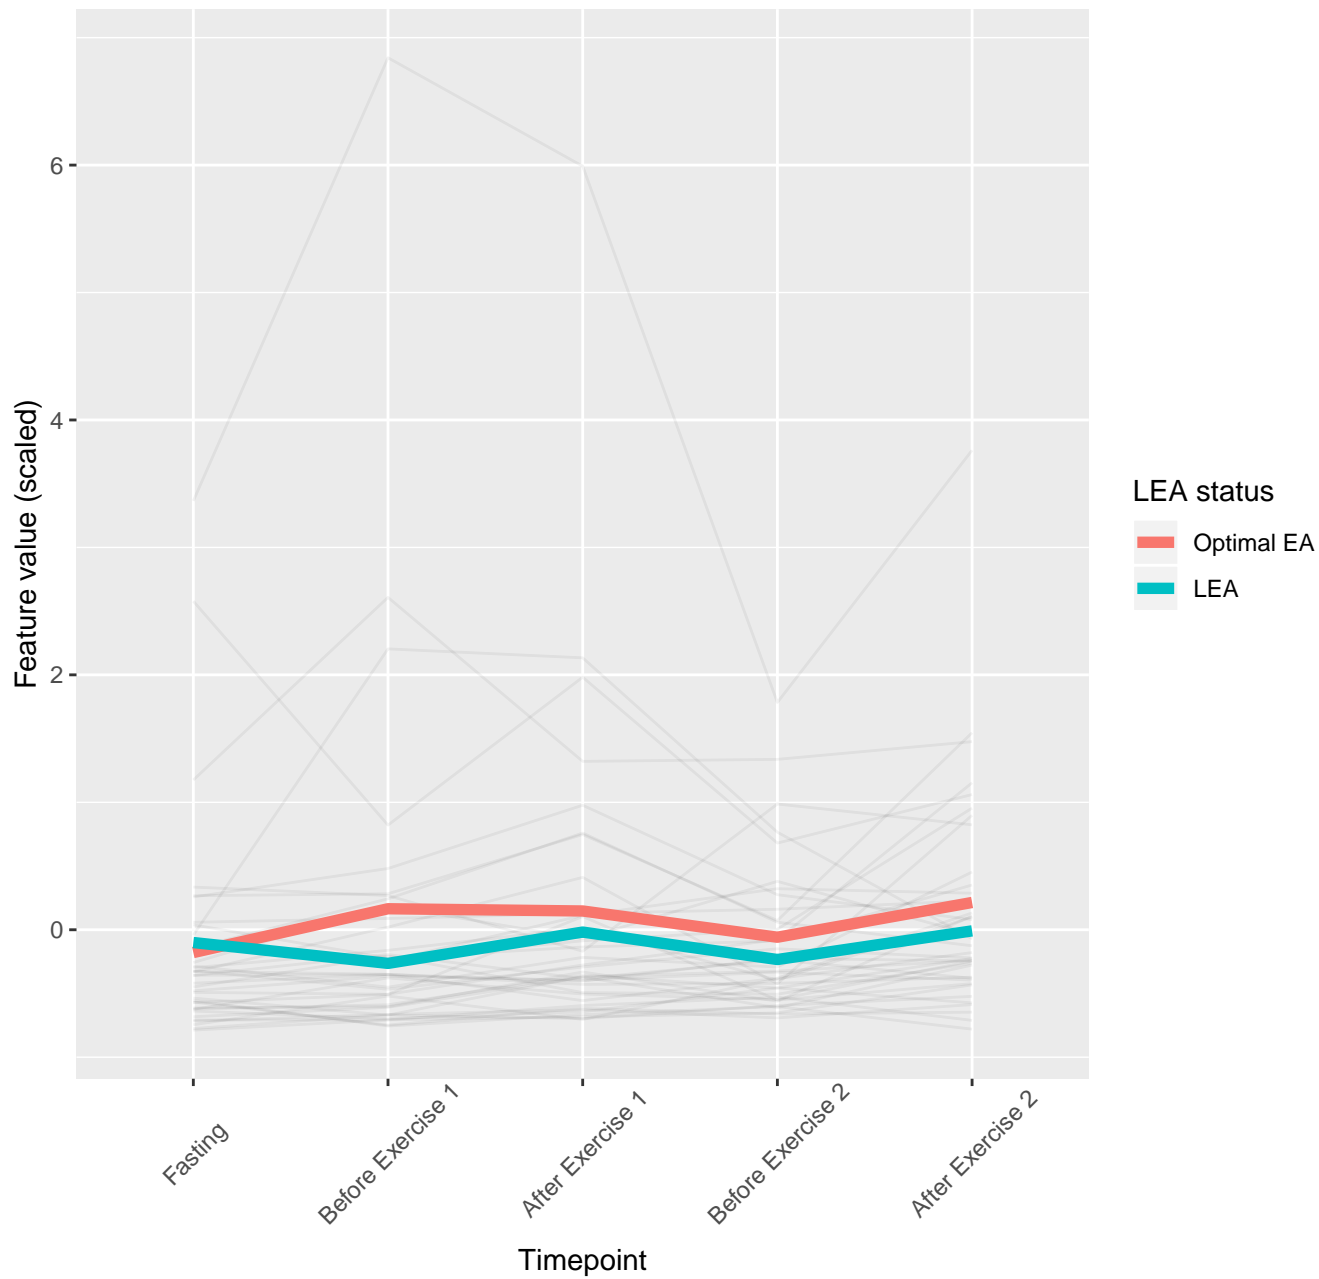

Line plot of TG(58:10)

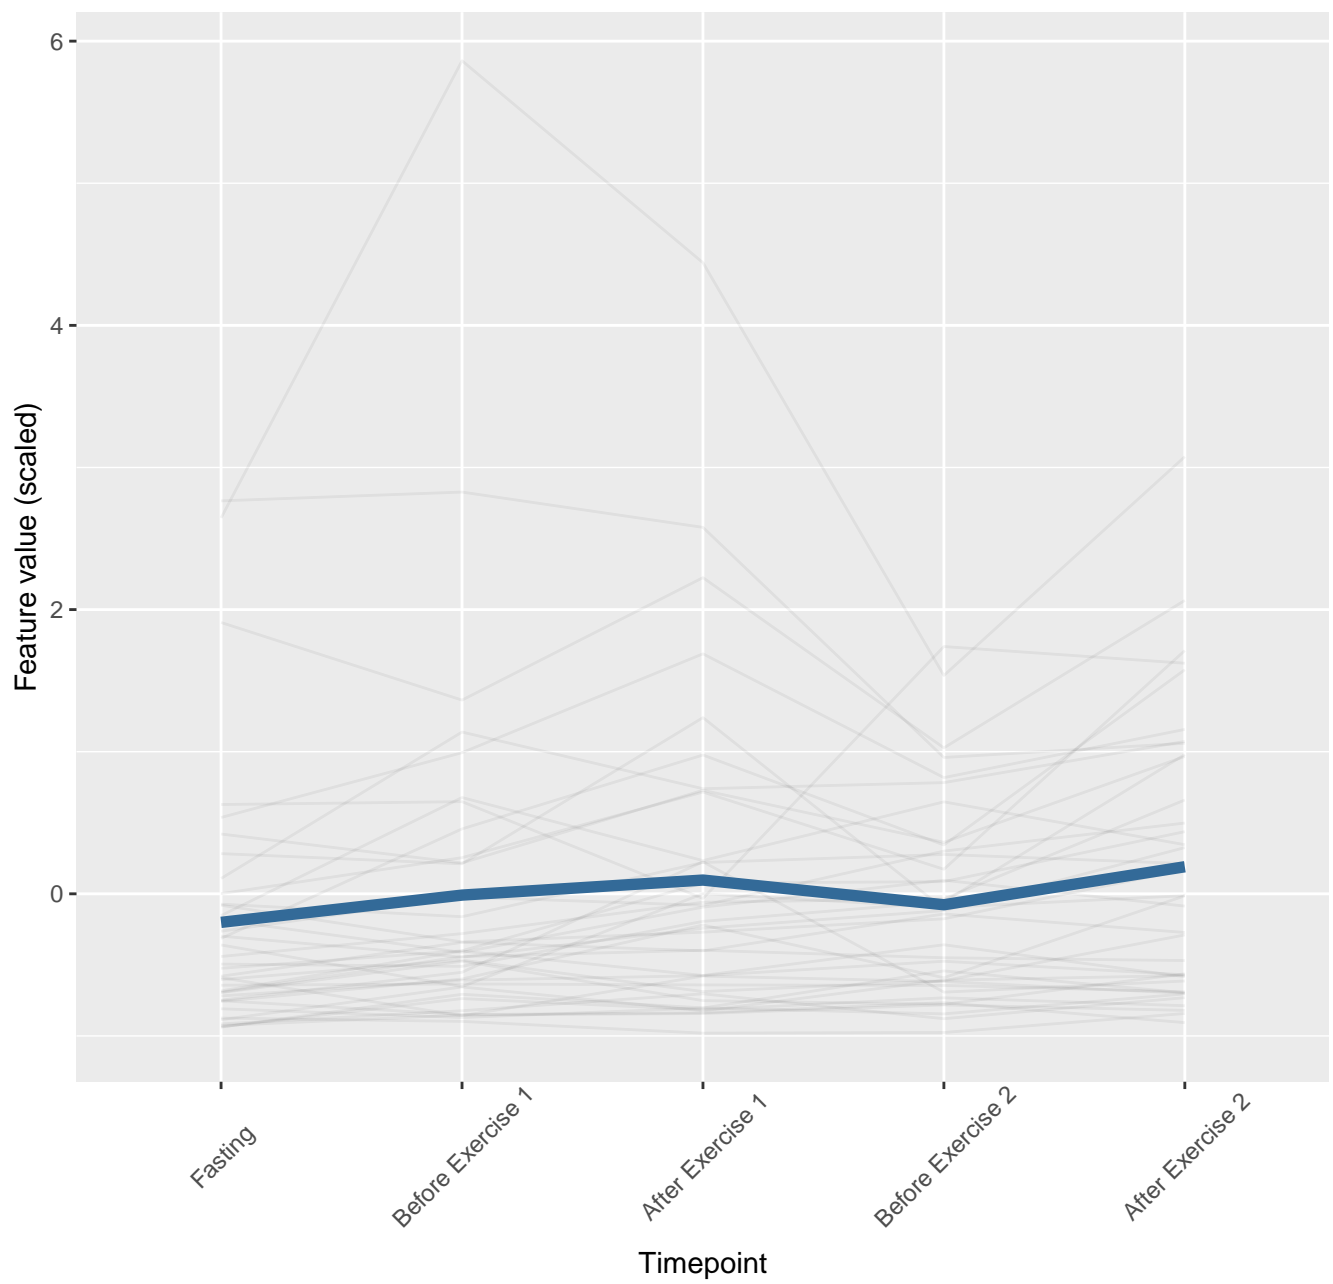

Line plot of TG(58:10)

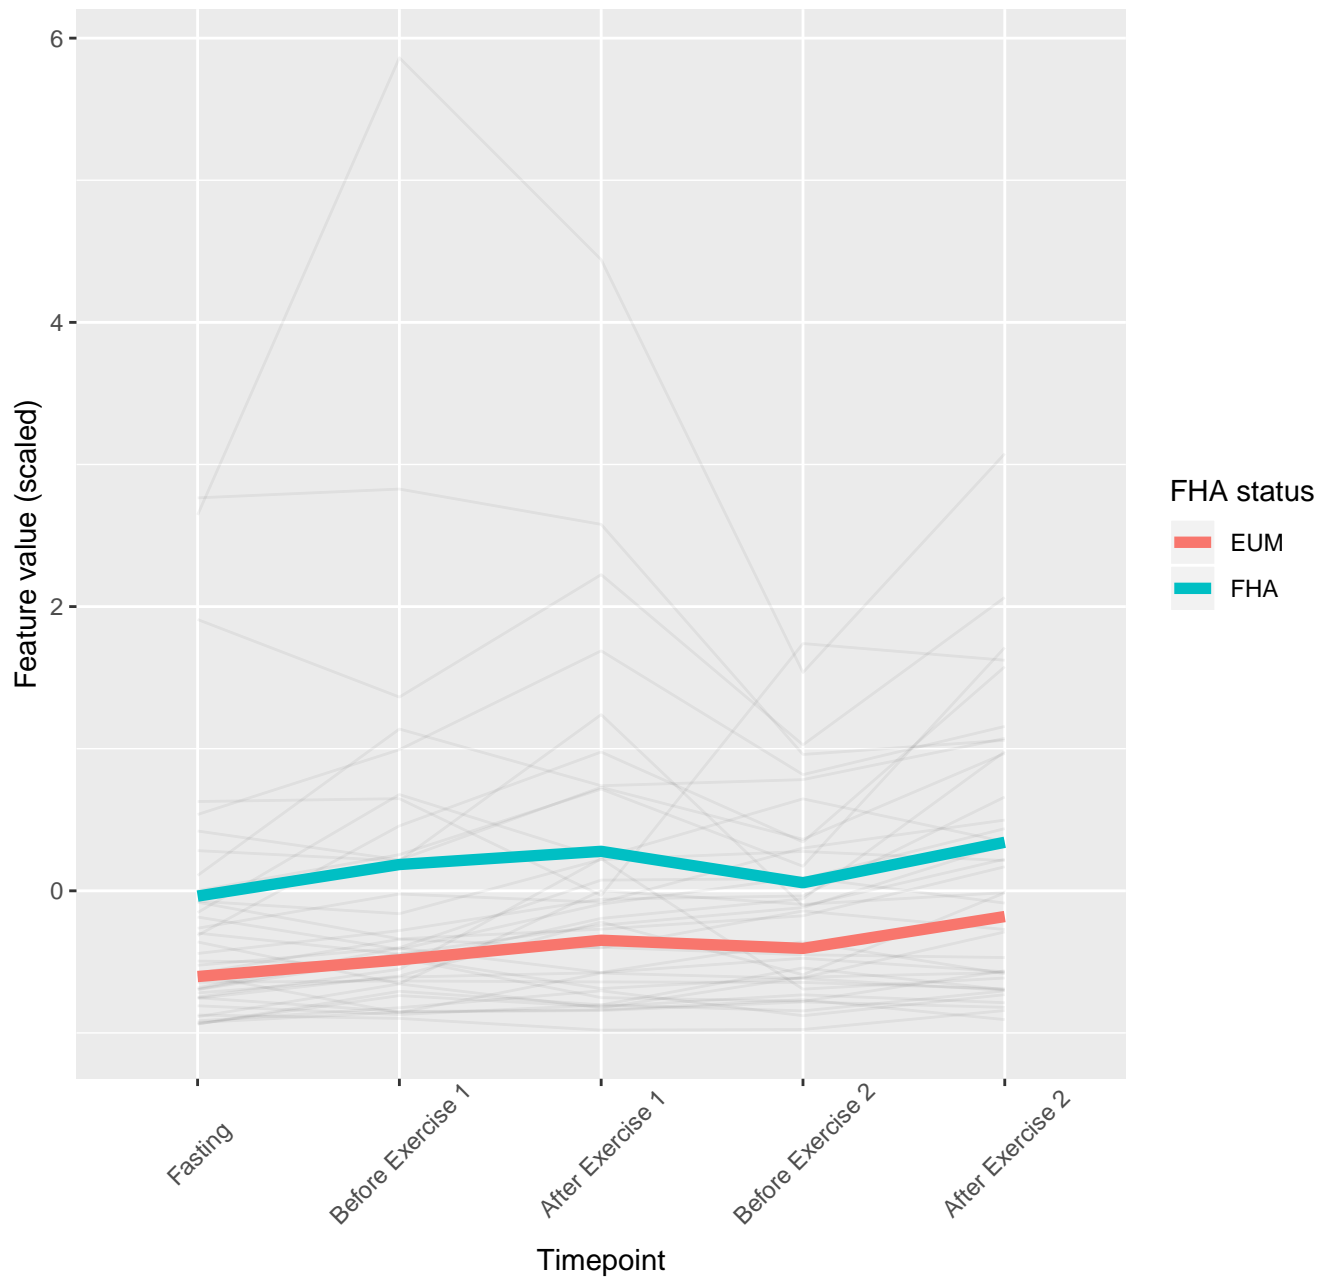

Line plot of TG(58:10)

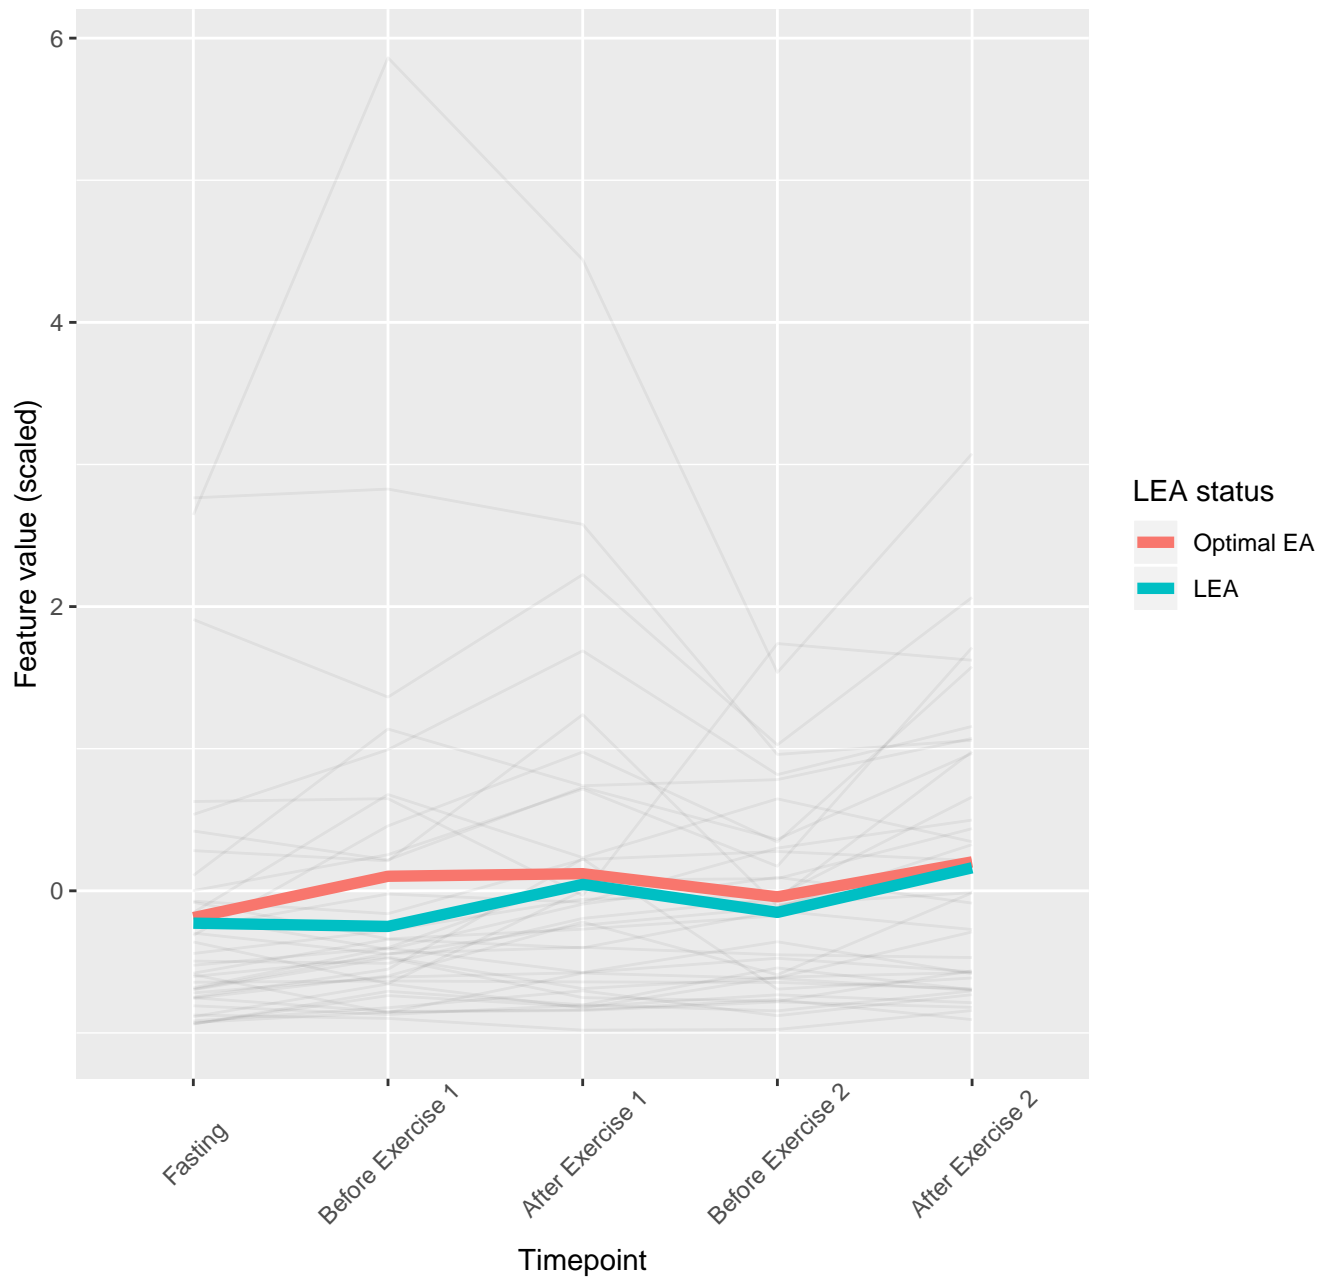

Line plot of TG(58:11)

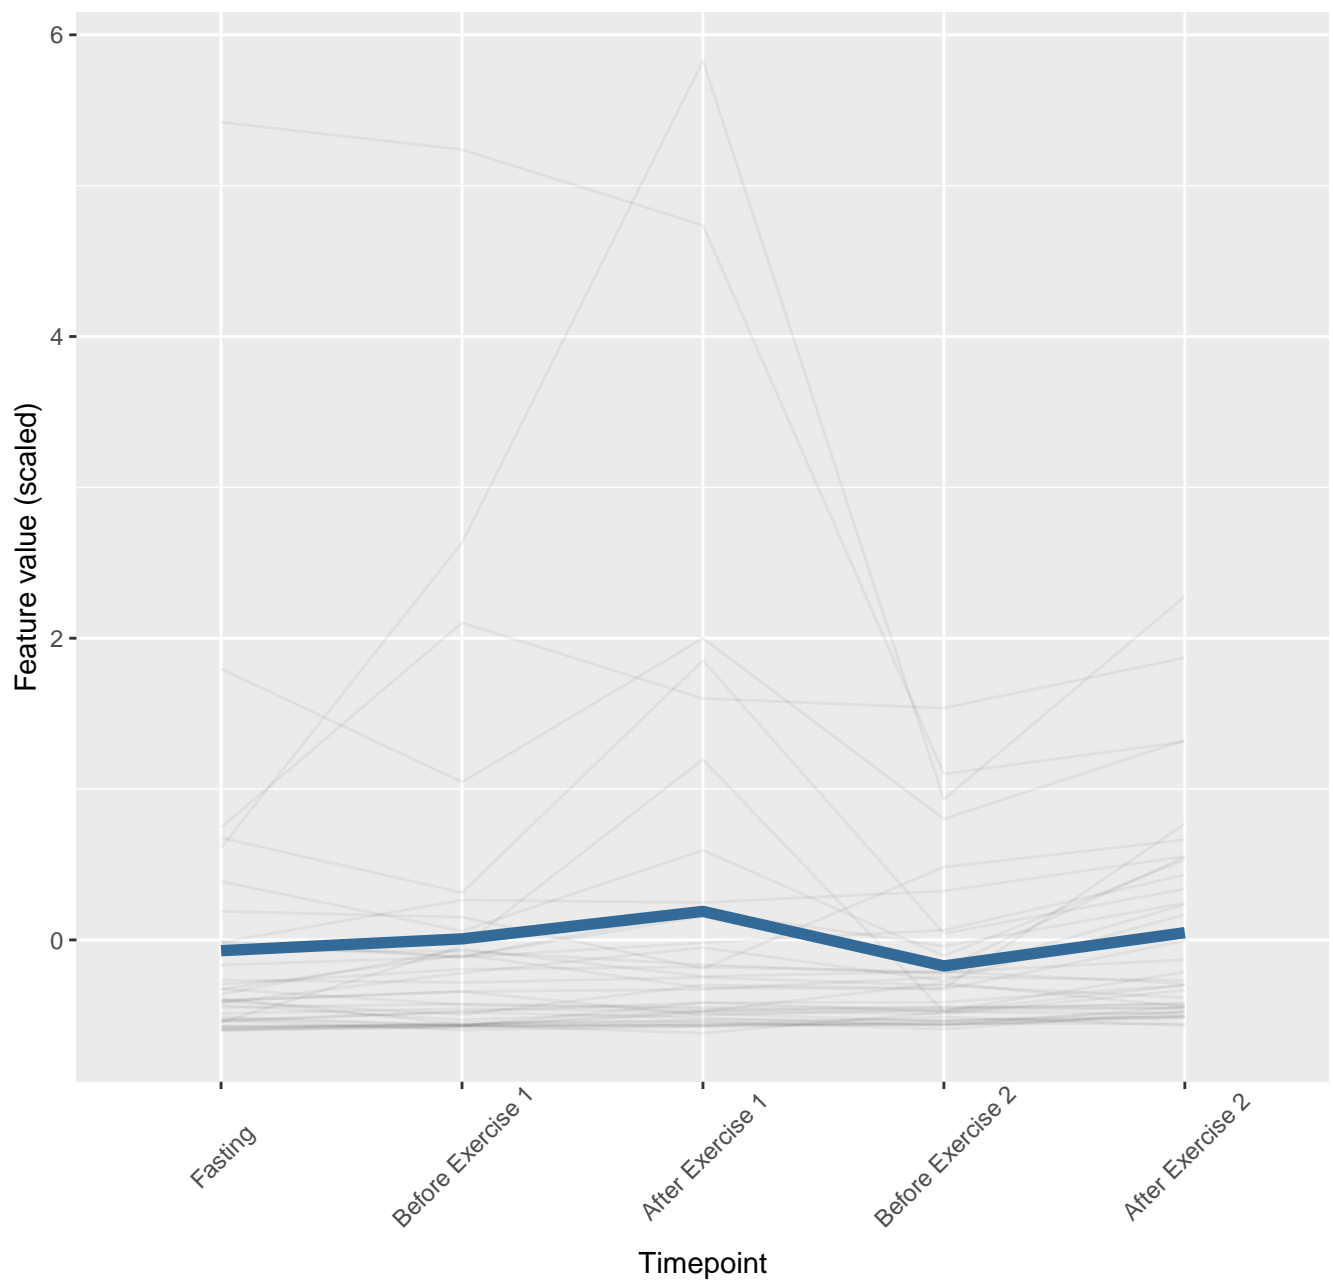

Line plot of TG(58:11)

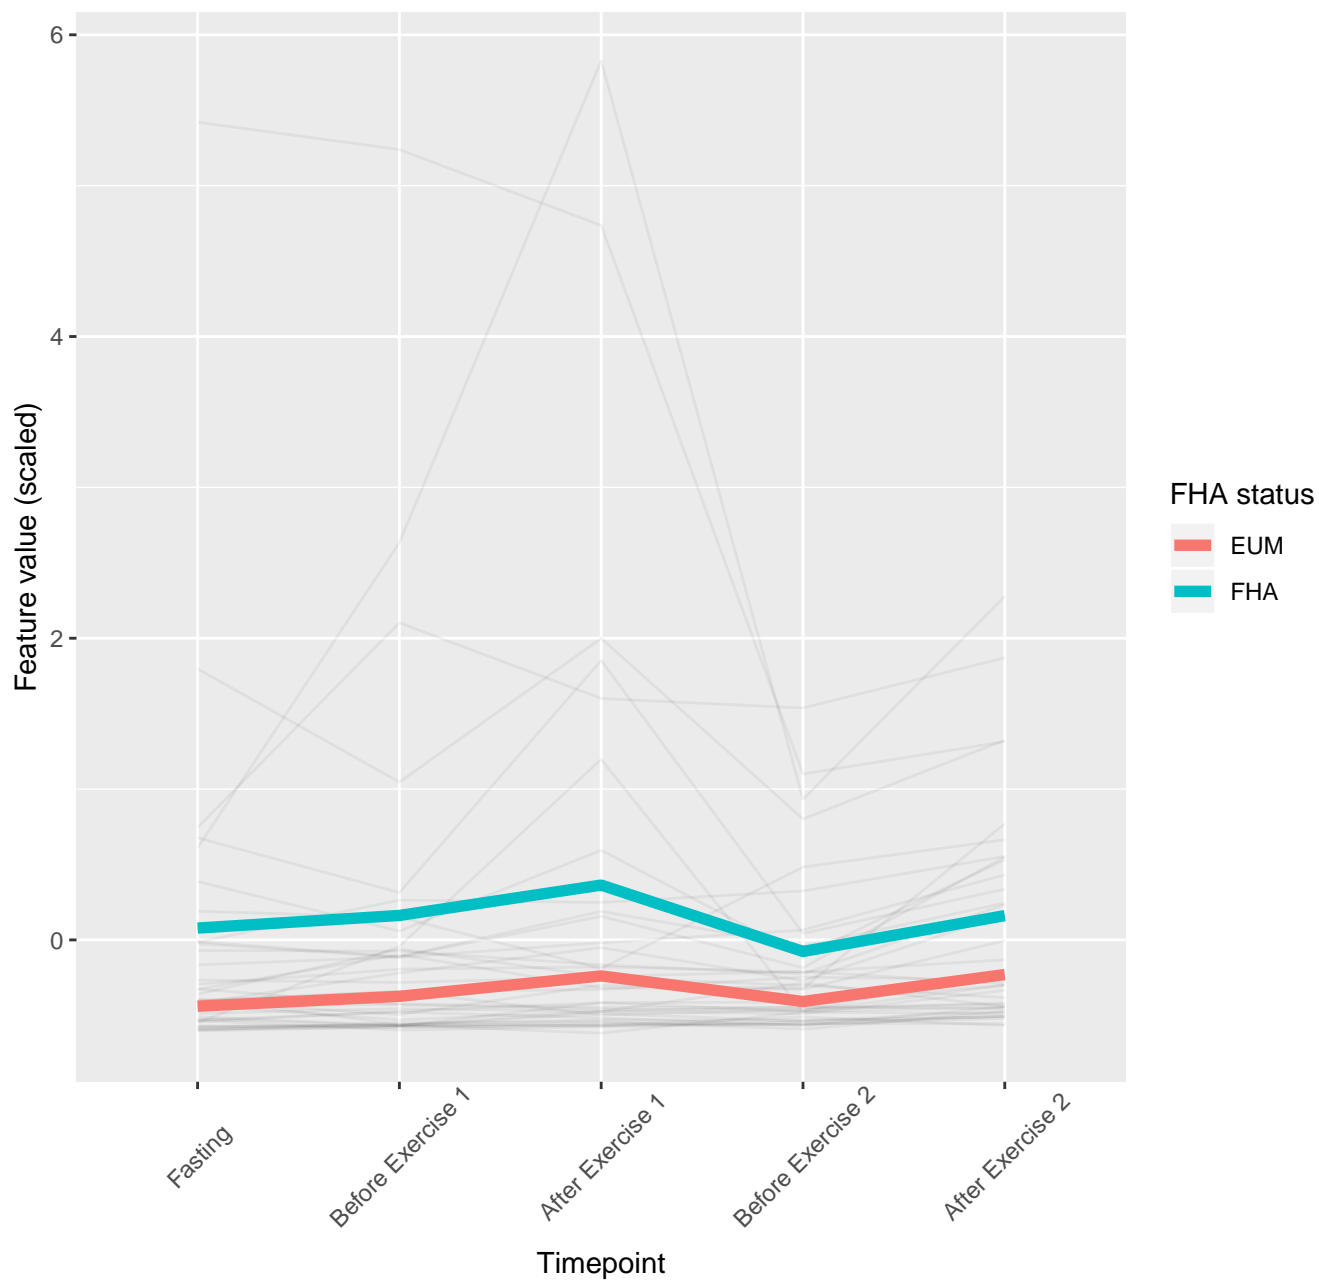



Line plot of TG(58:11)

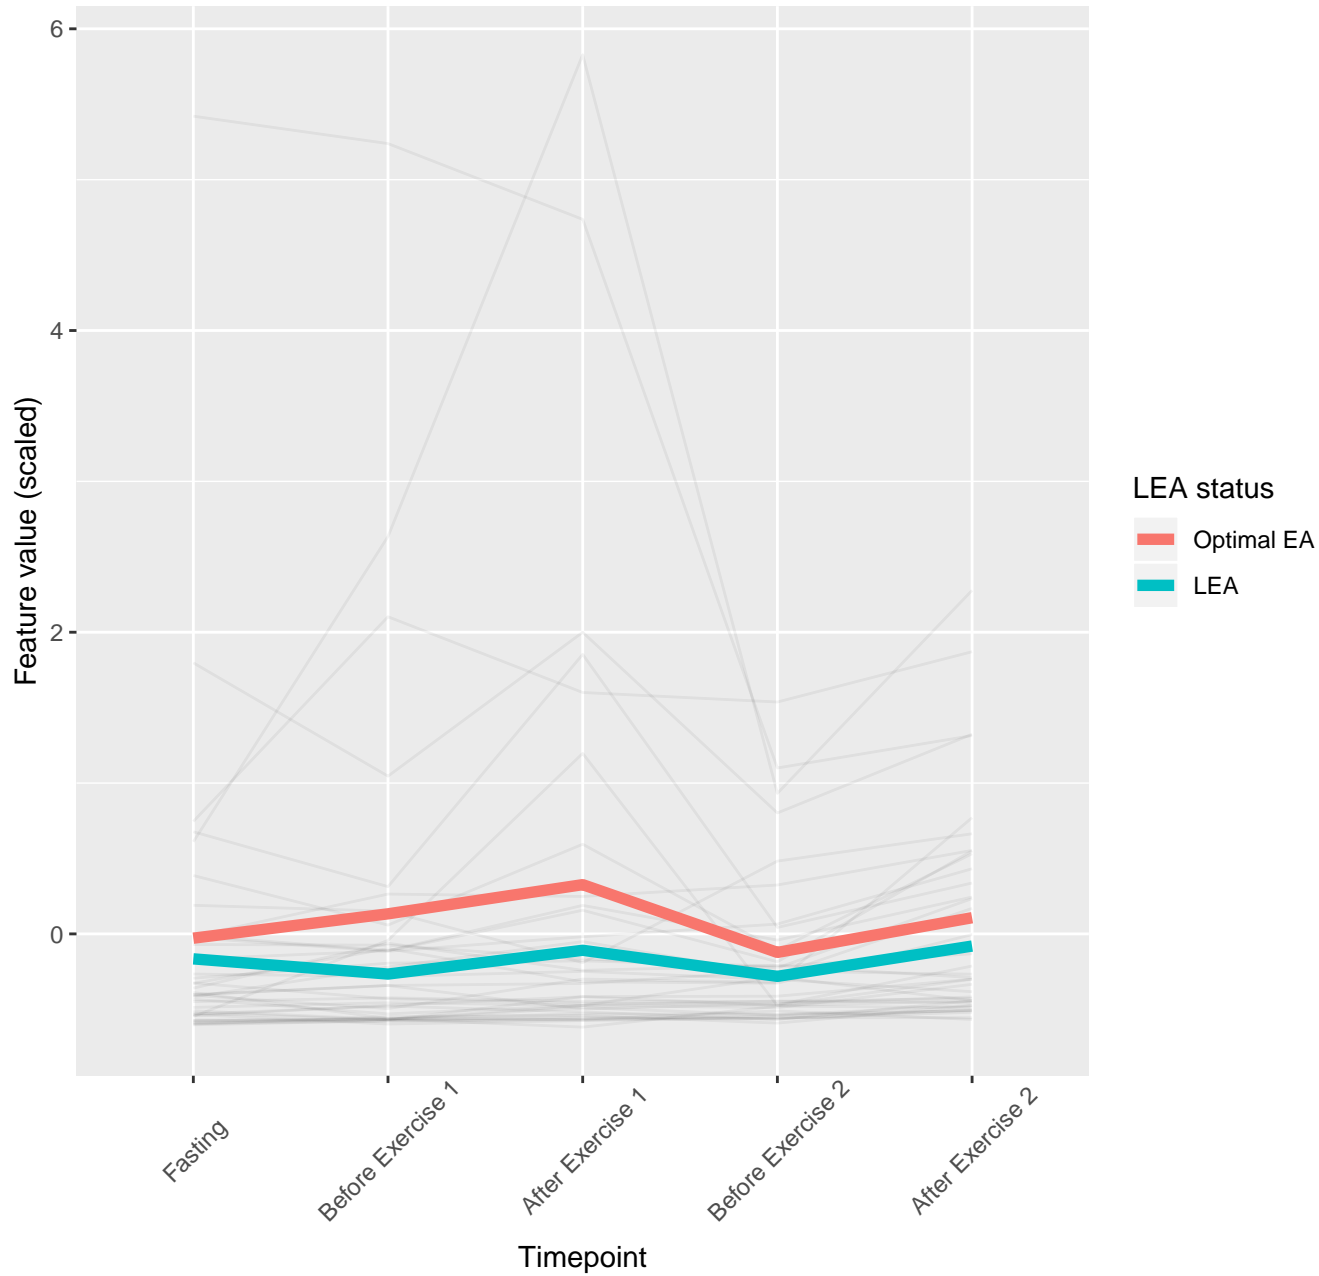

Line plot of TG(58:3)

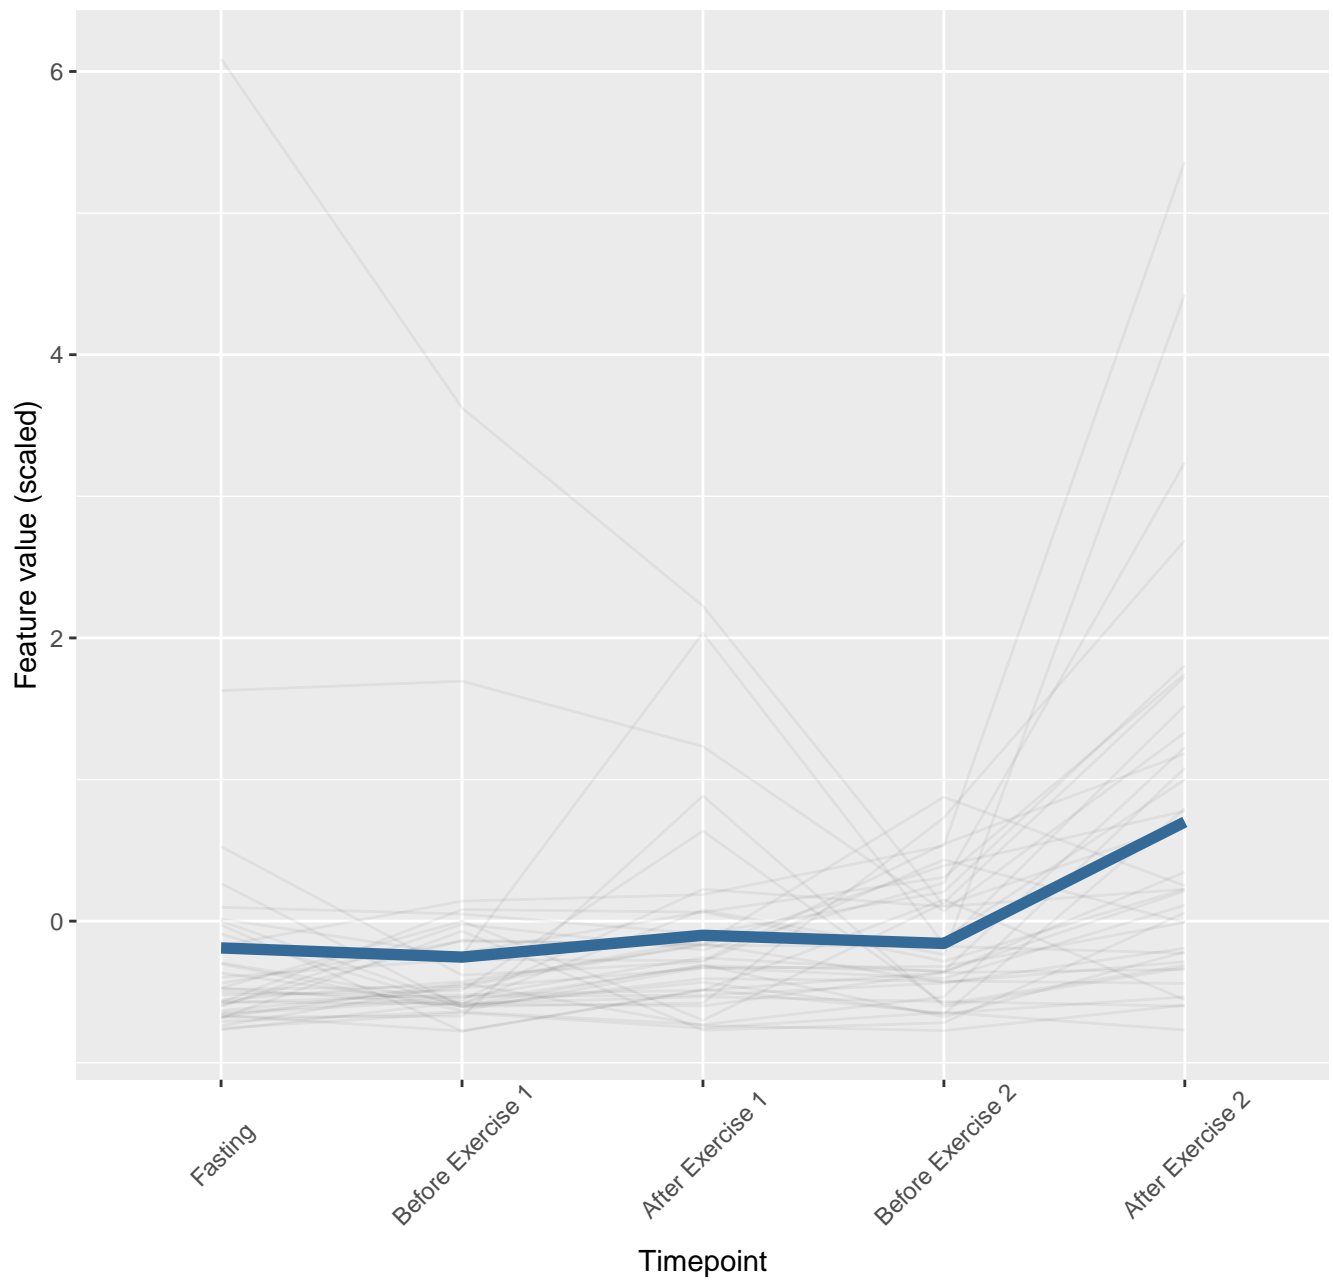

Line plot of TG(58:3)

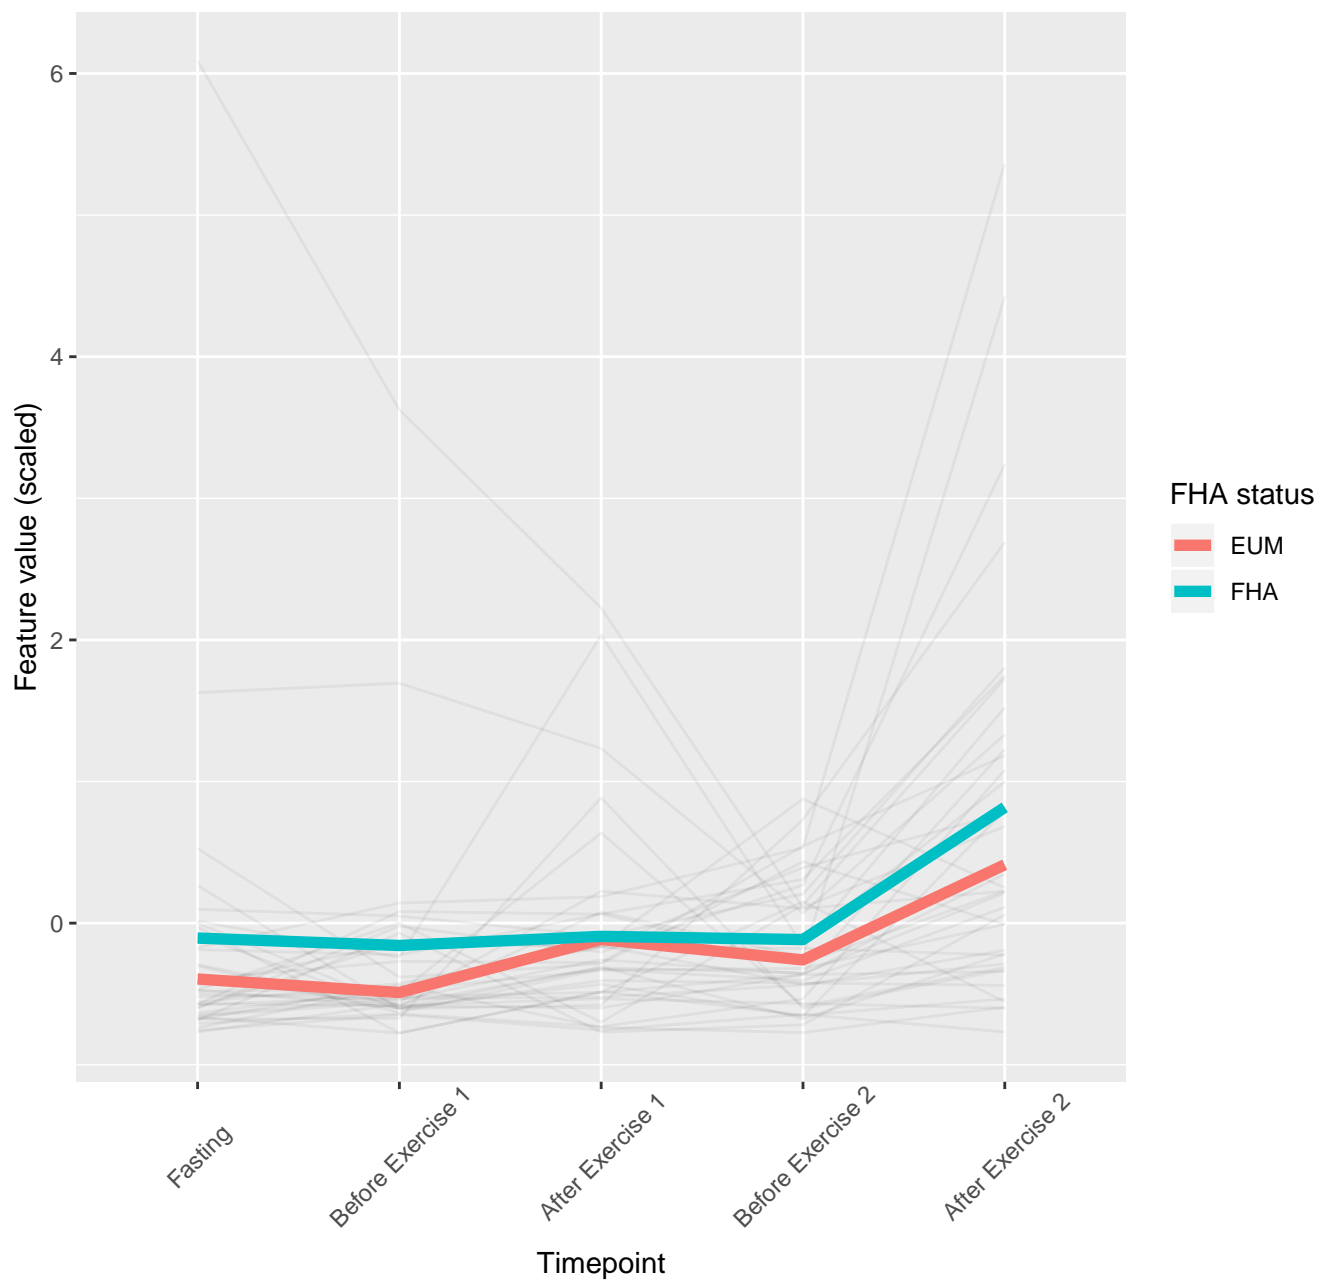

Line plot of TG(58:3)

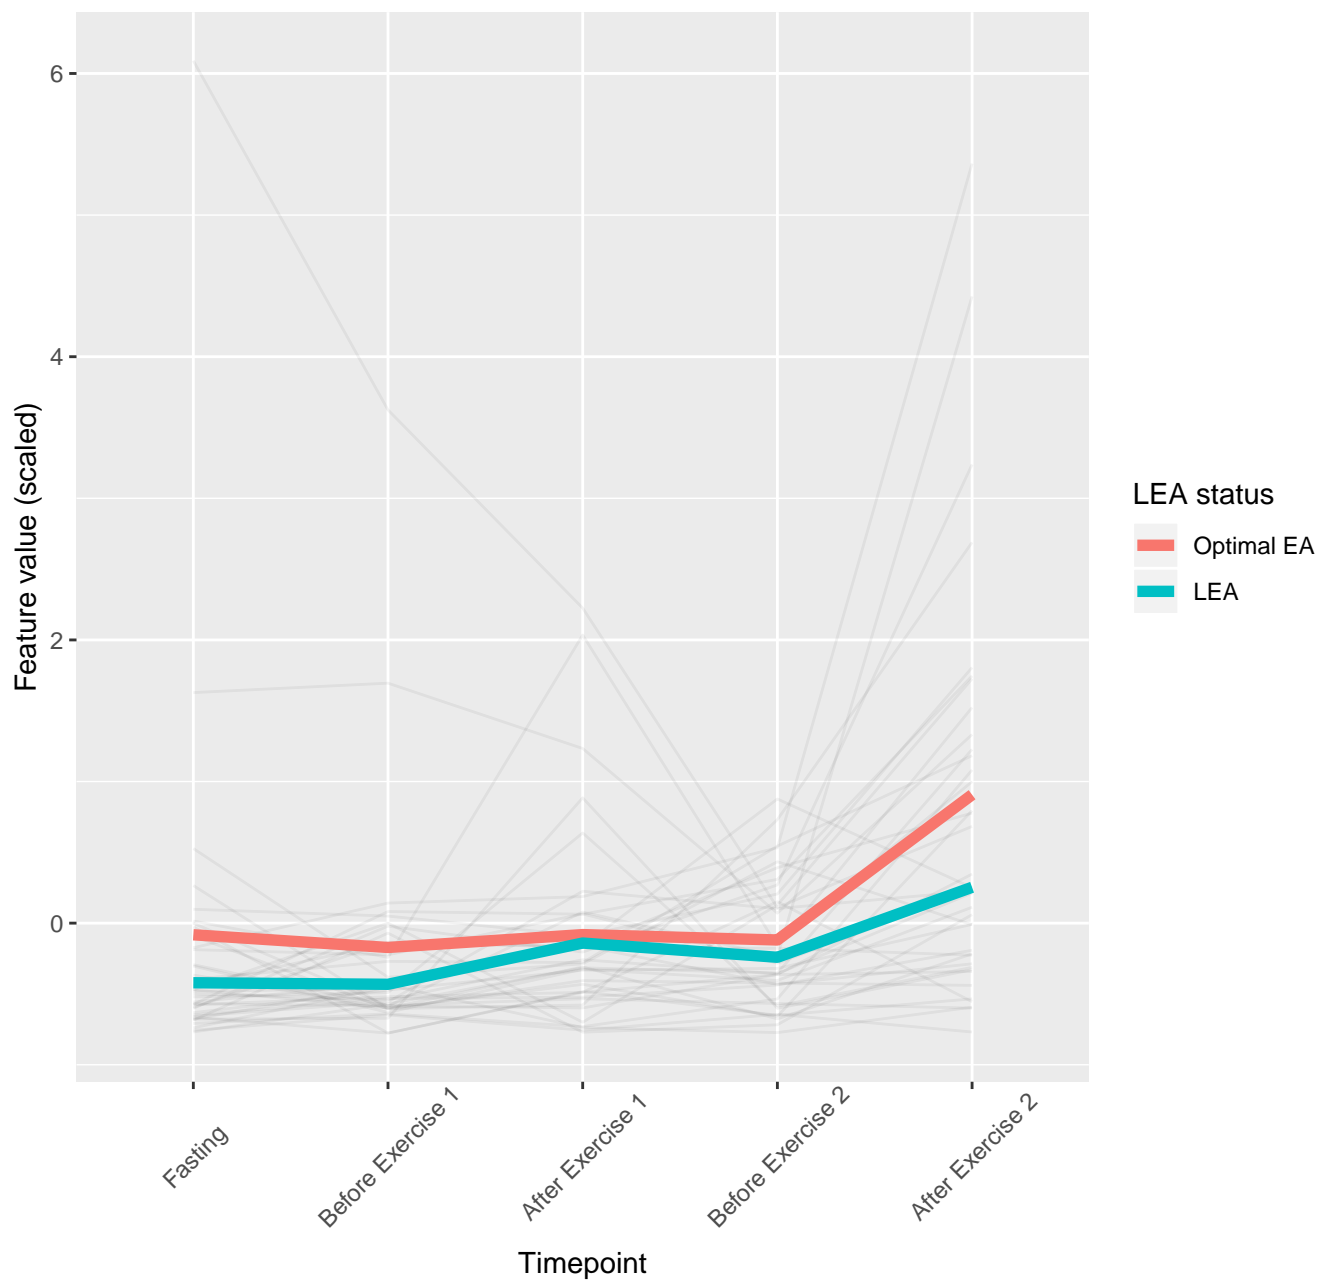

Line plot of TG(58:4)

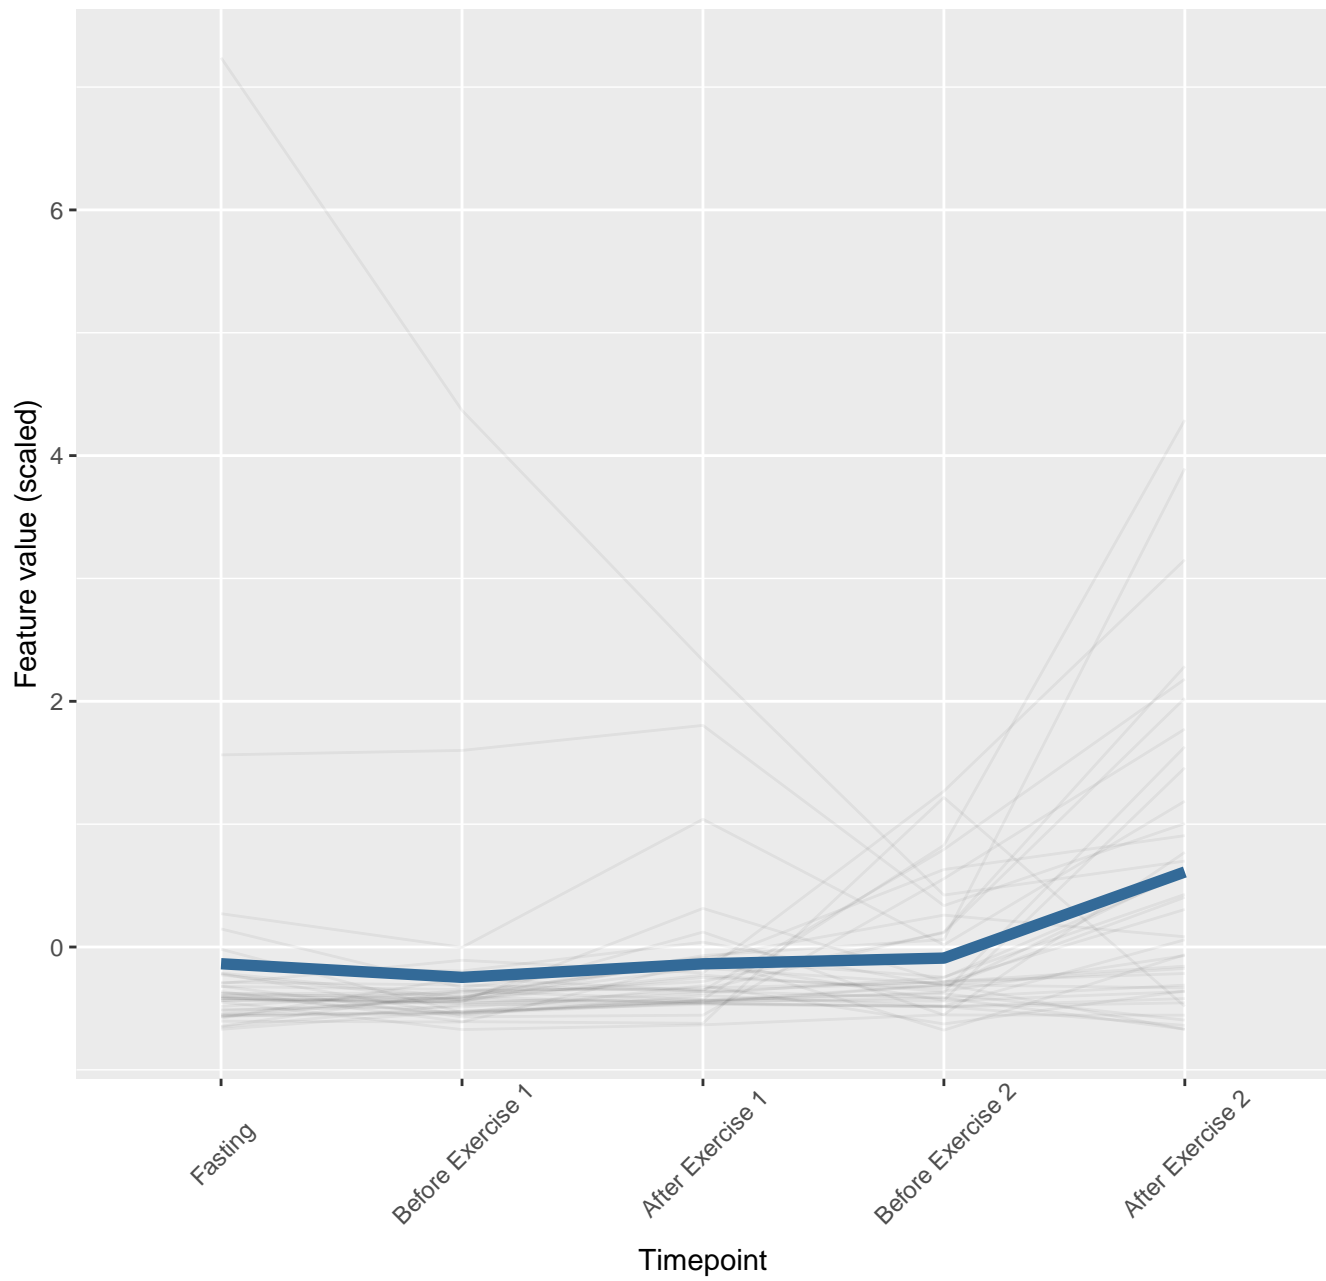

Line plot of TG(58:4)

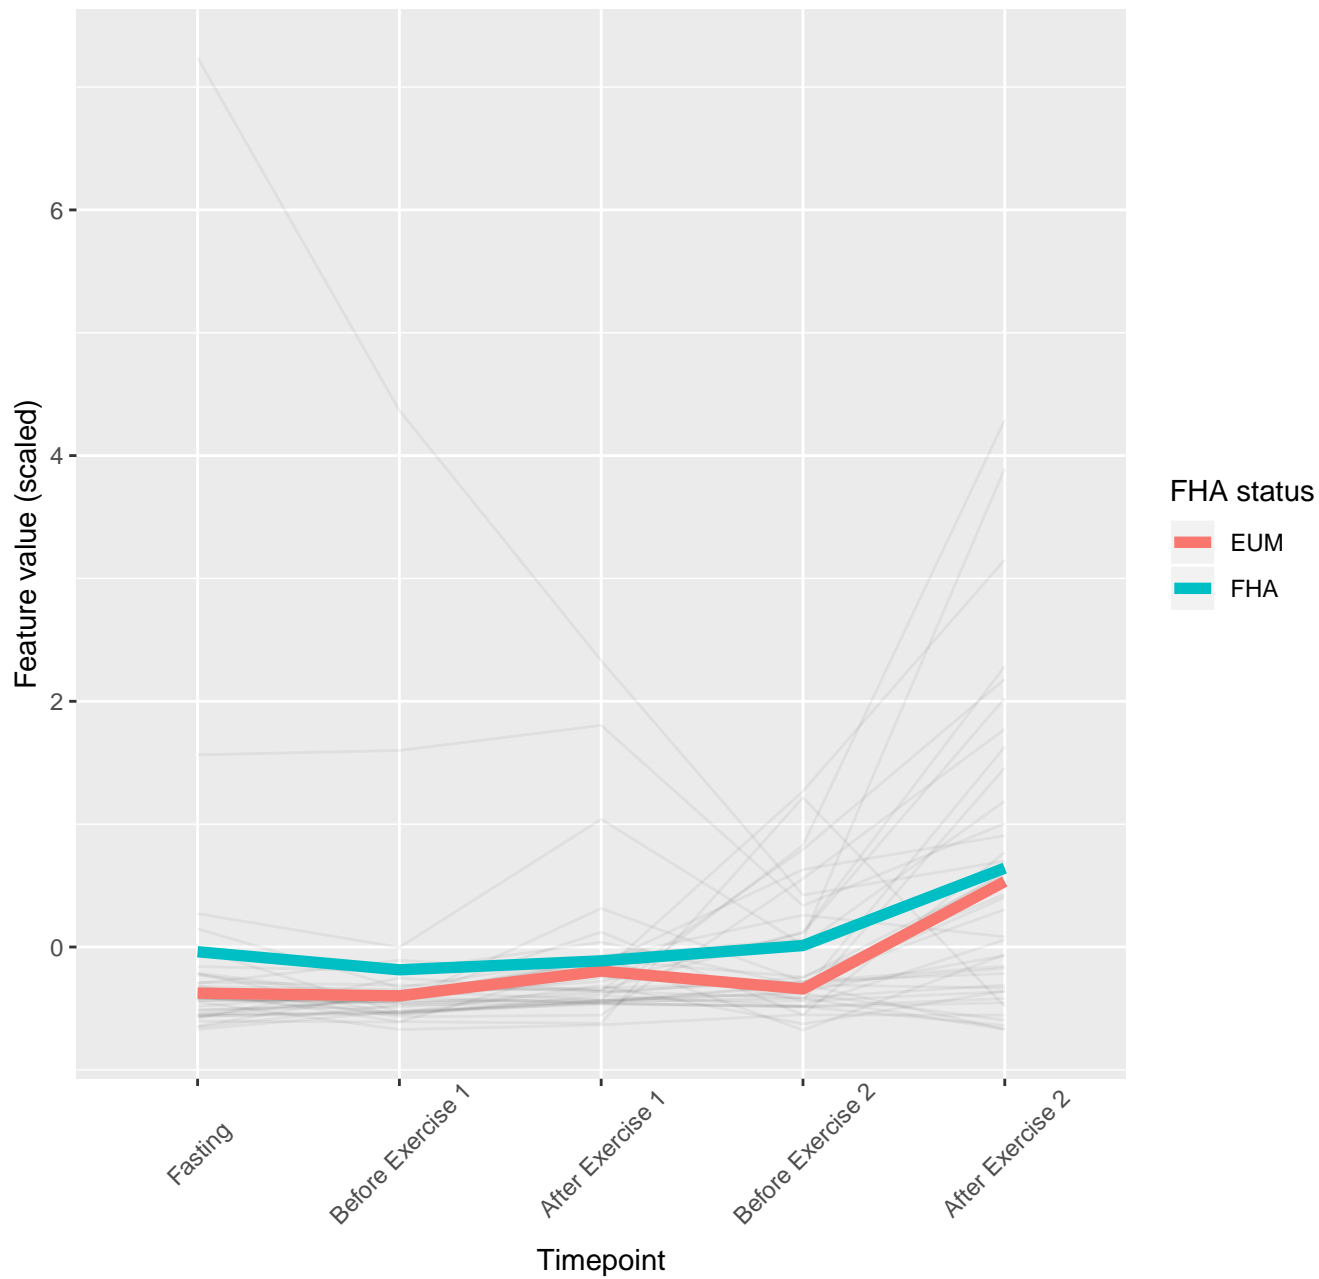

Line plot of TG(58:4)

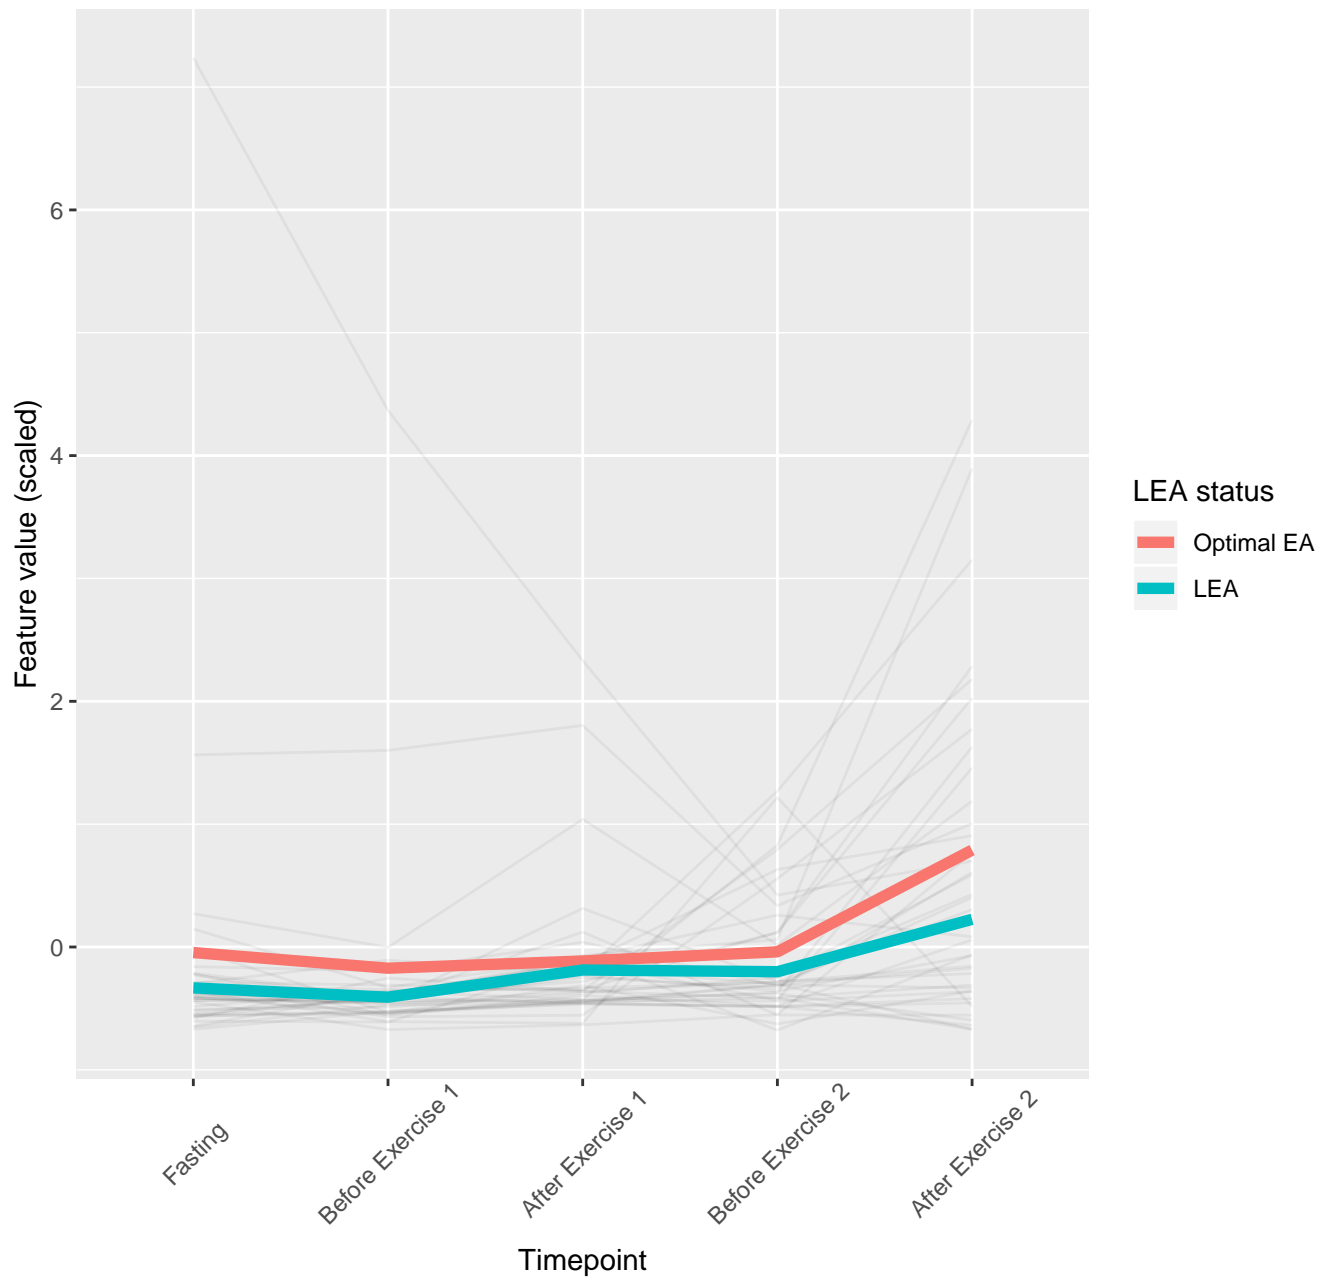

Line plot of TG(58:5)

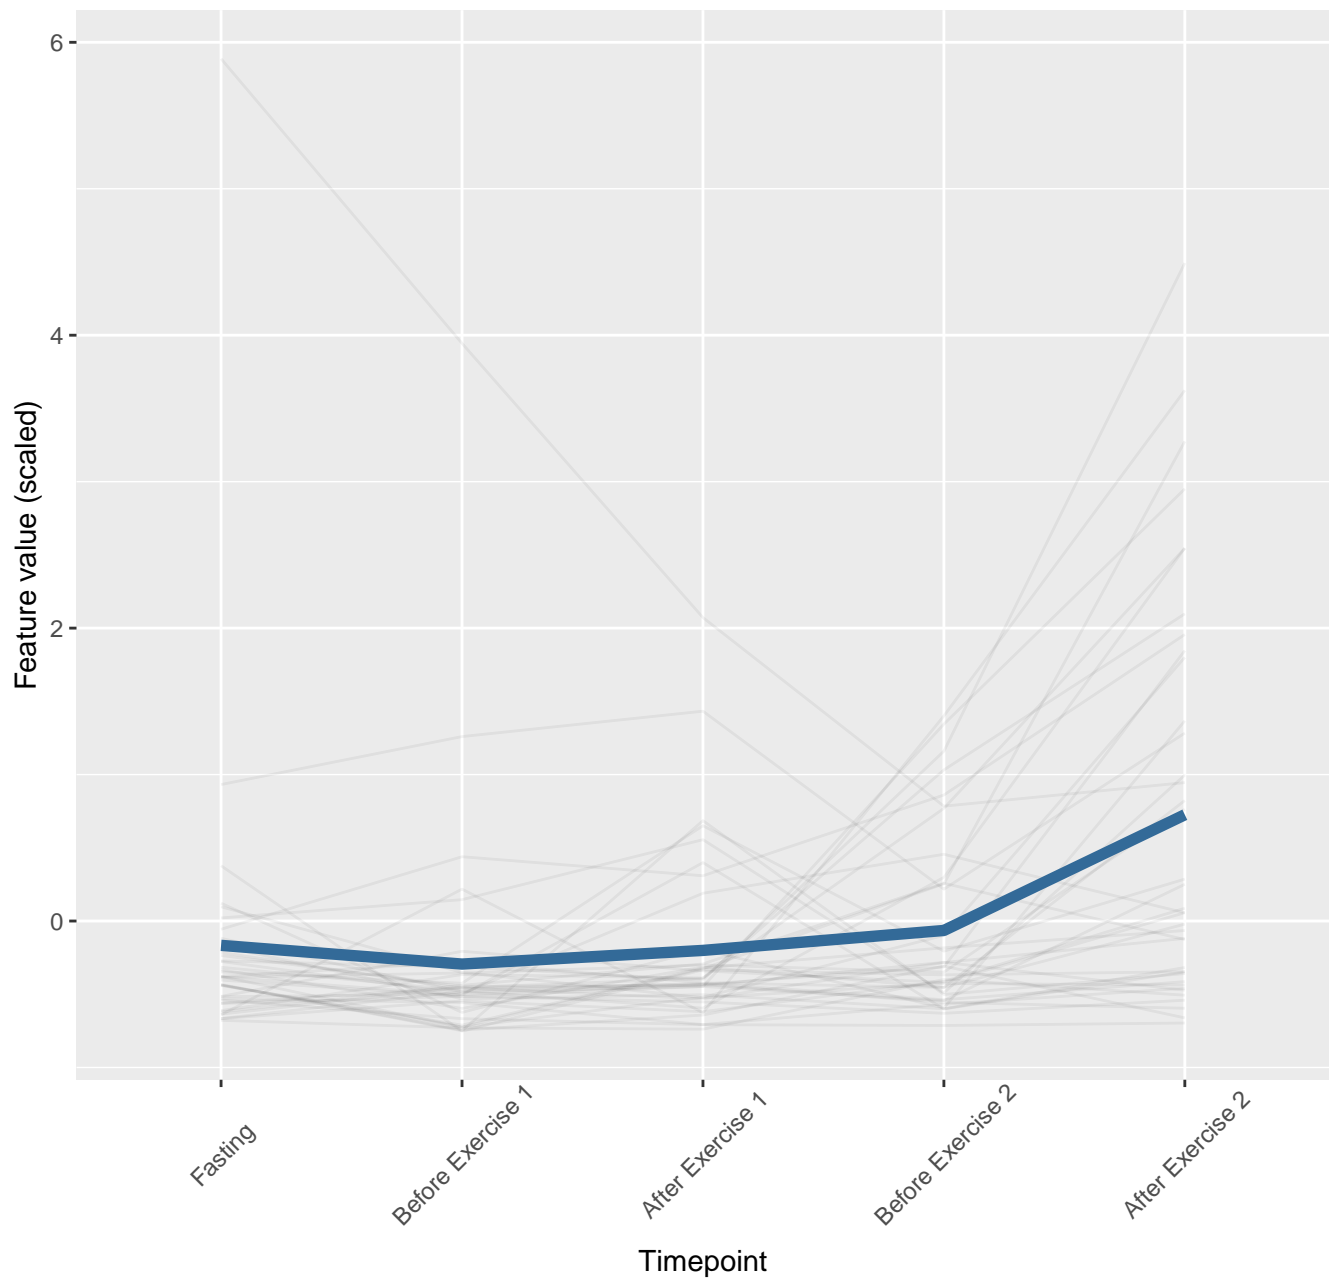



Line plot of TG(58:5)

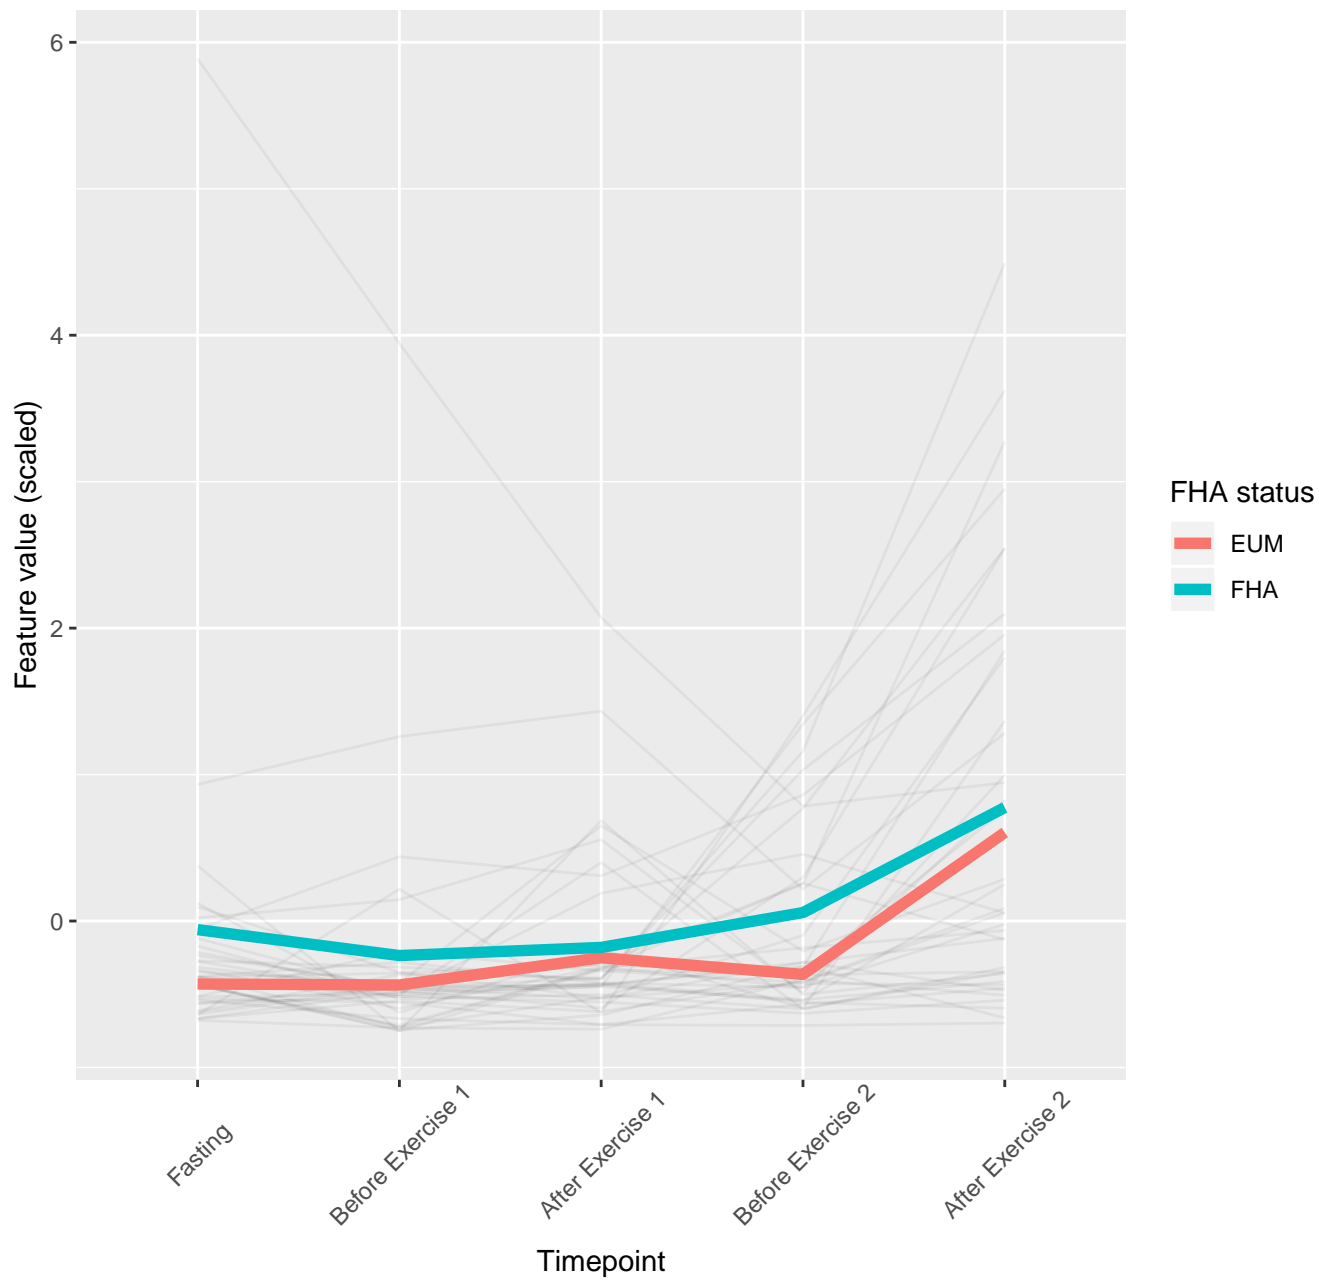

Line plot of TG(58:5)

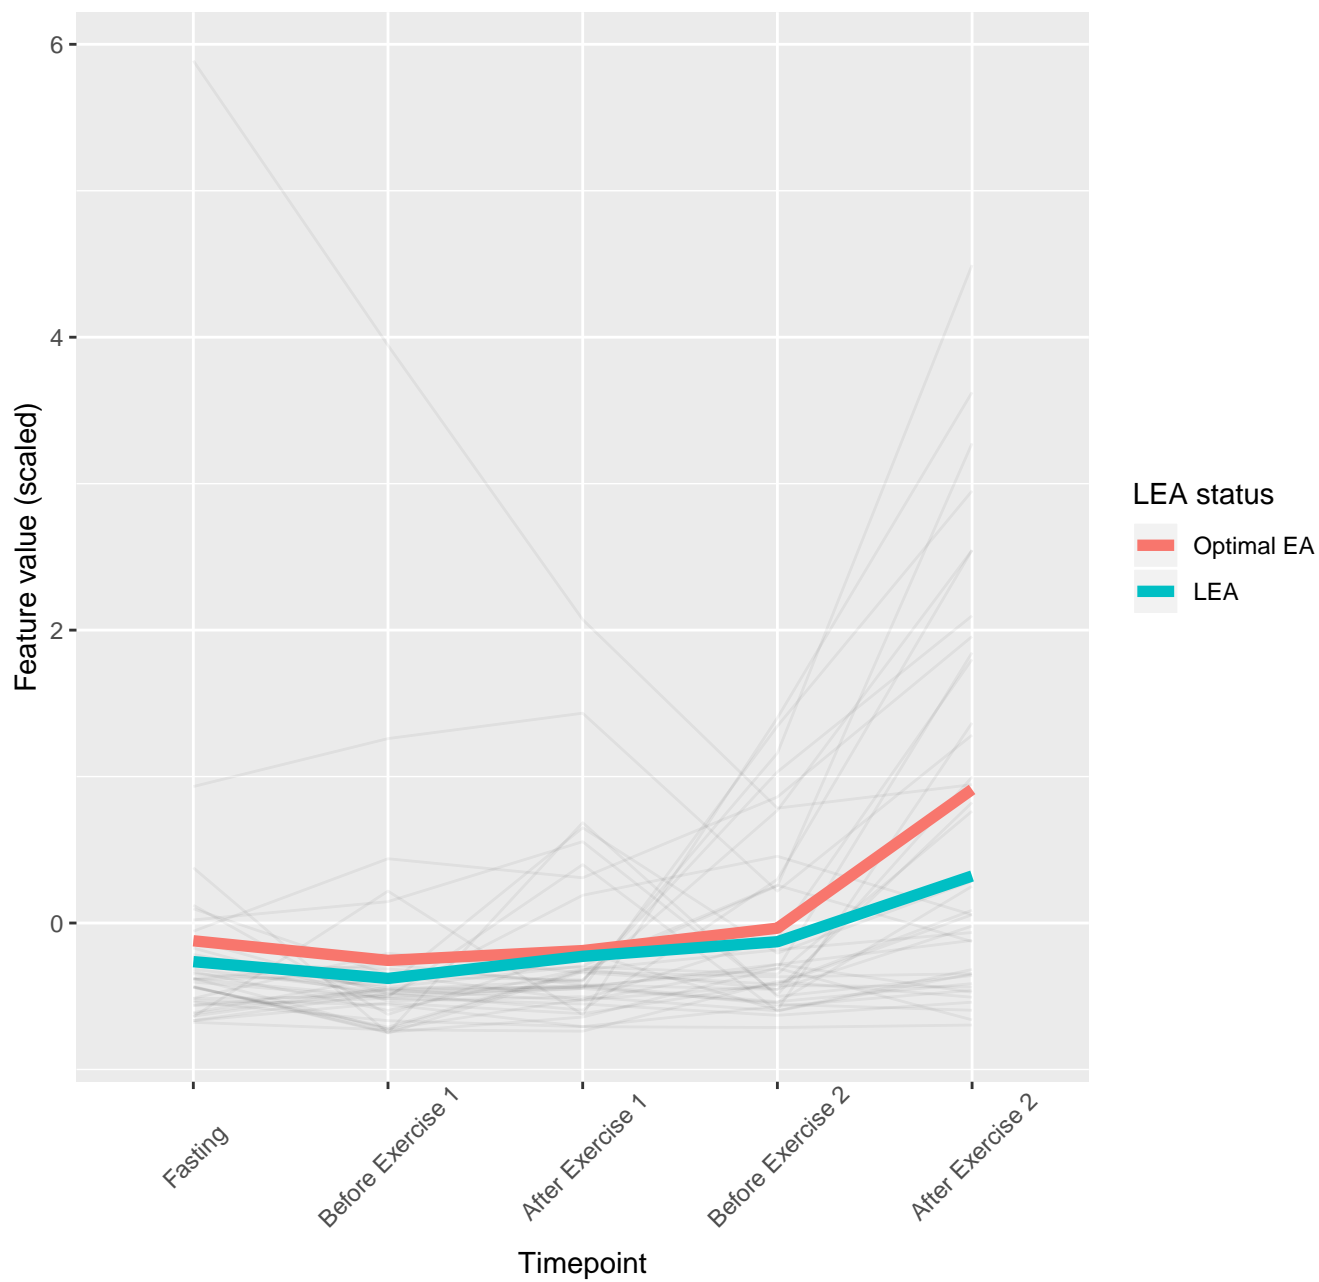

Line plot of TG(58:6)

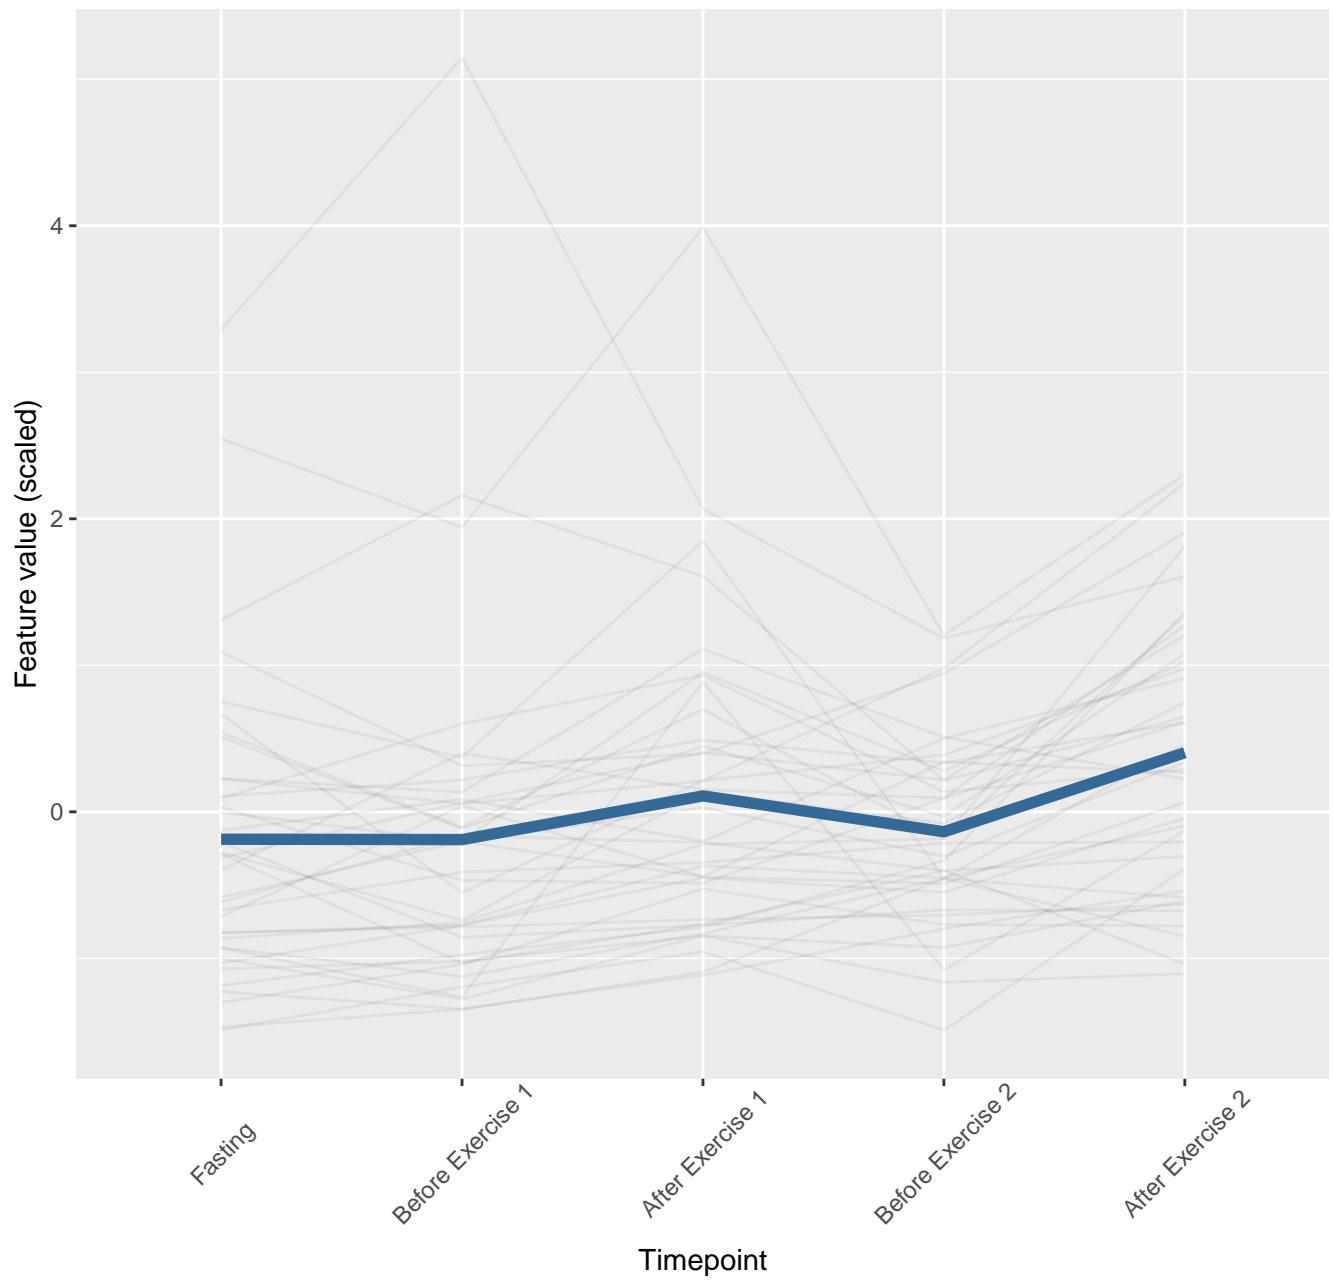

Line plot of TG(58:6)

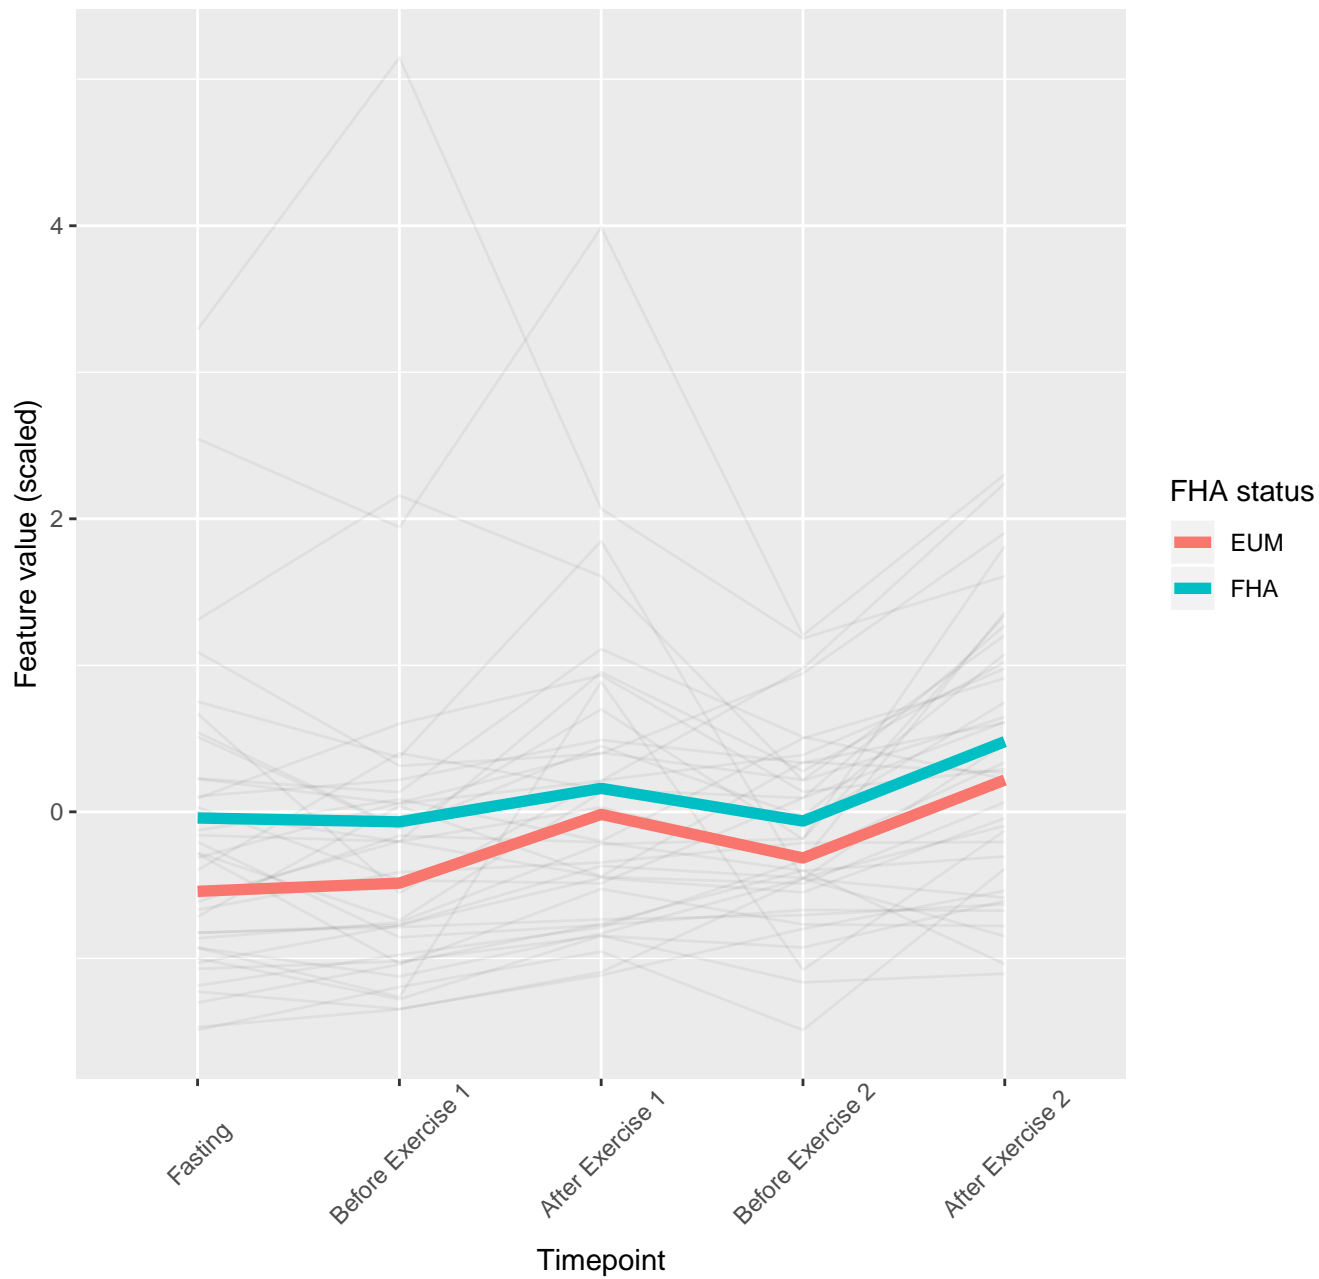

Line plot of TG(58:6)

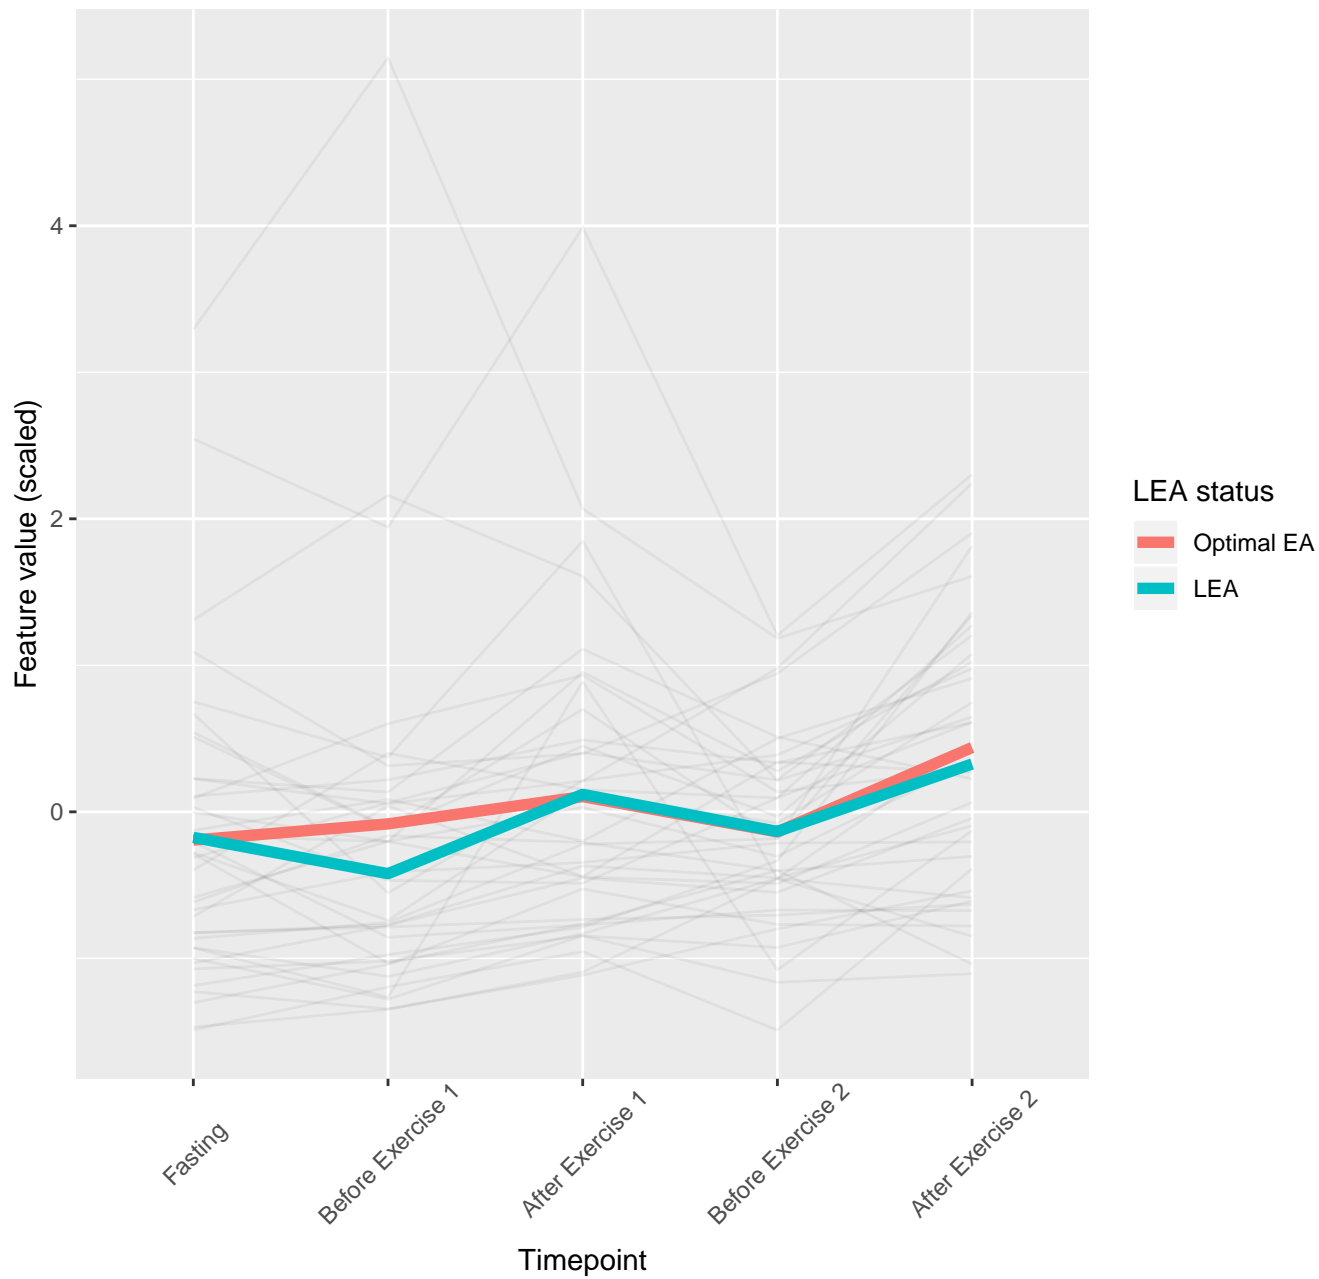

Line plot of TG(58:7)

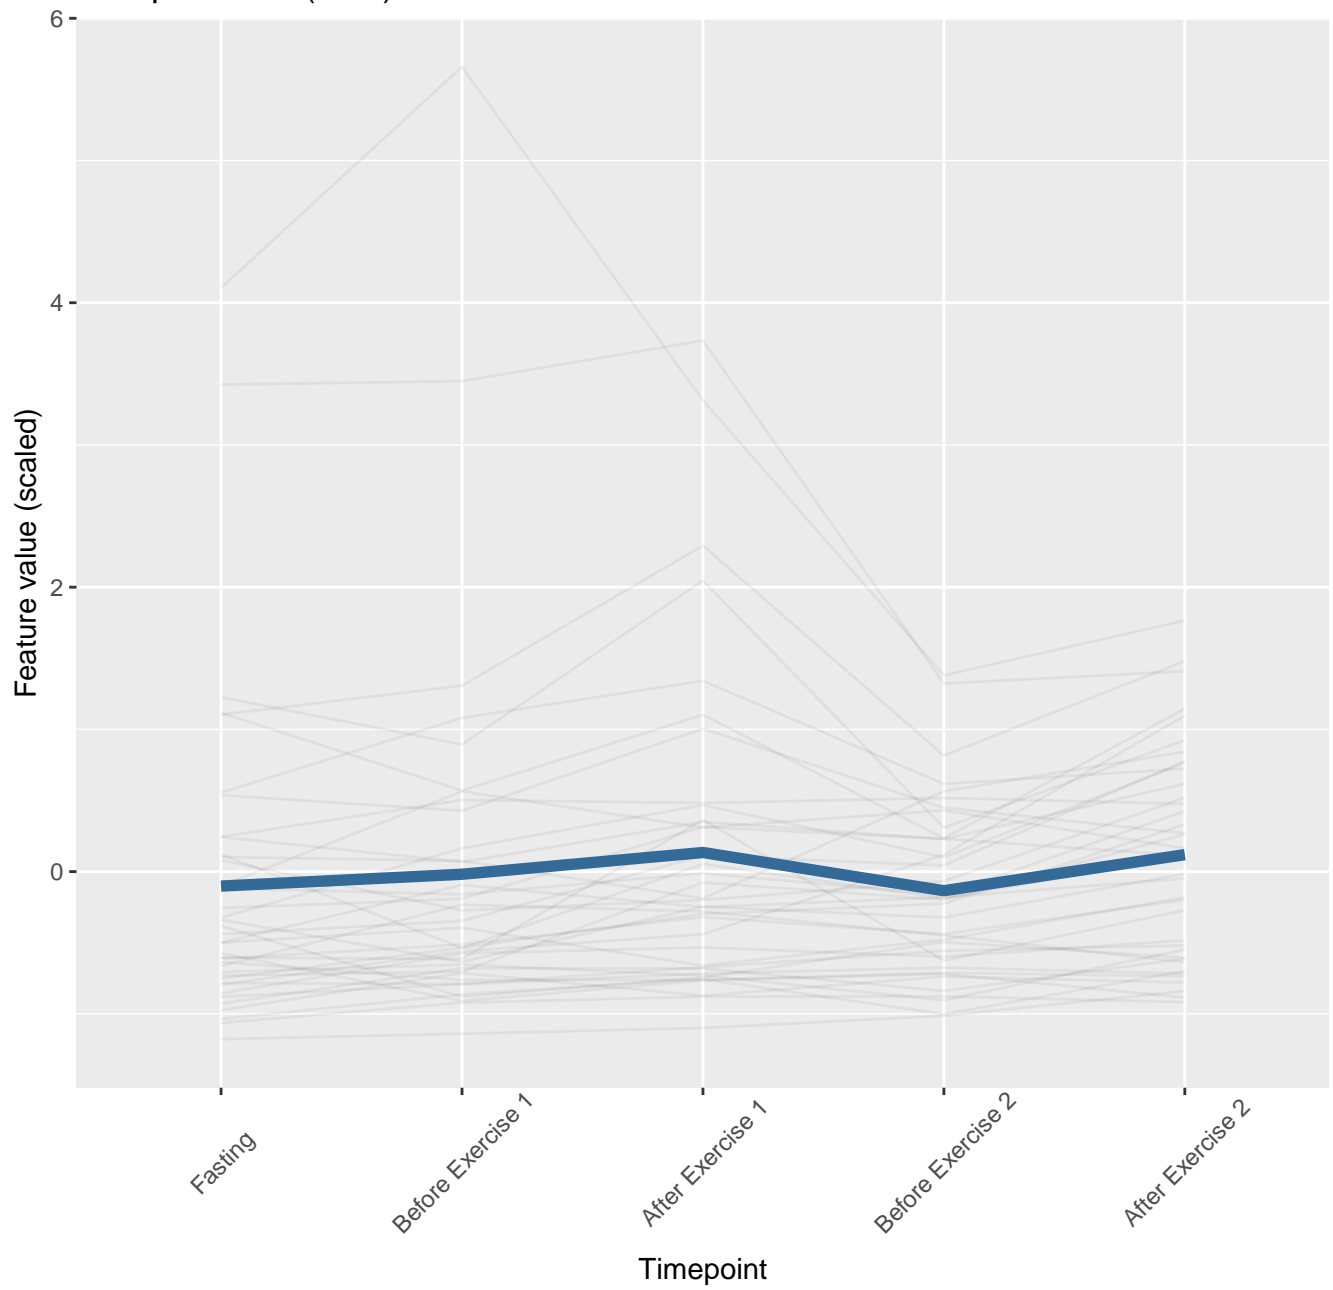

Line plot of TG(58:7)

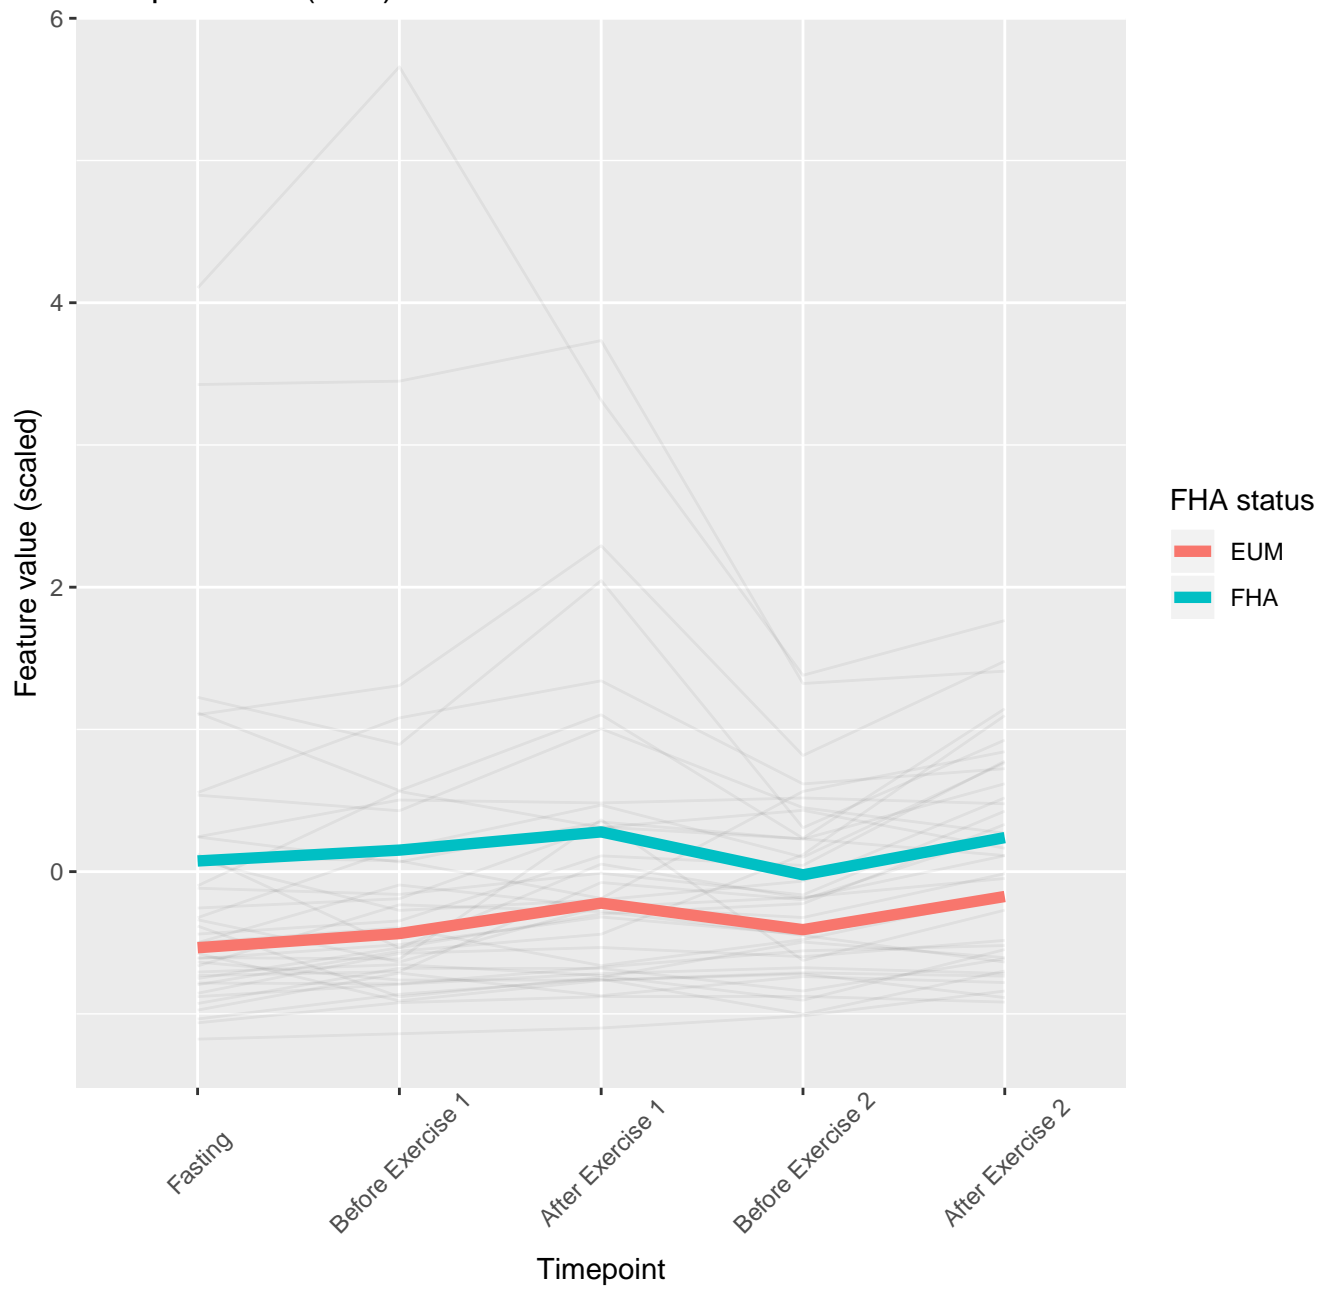

Line plot of TG(58:7)

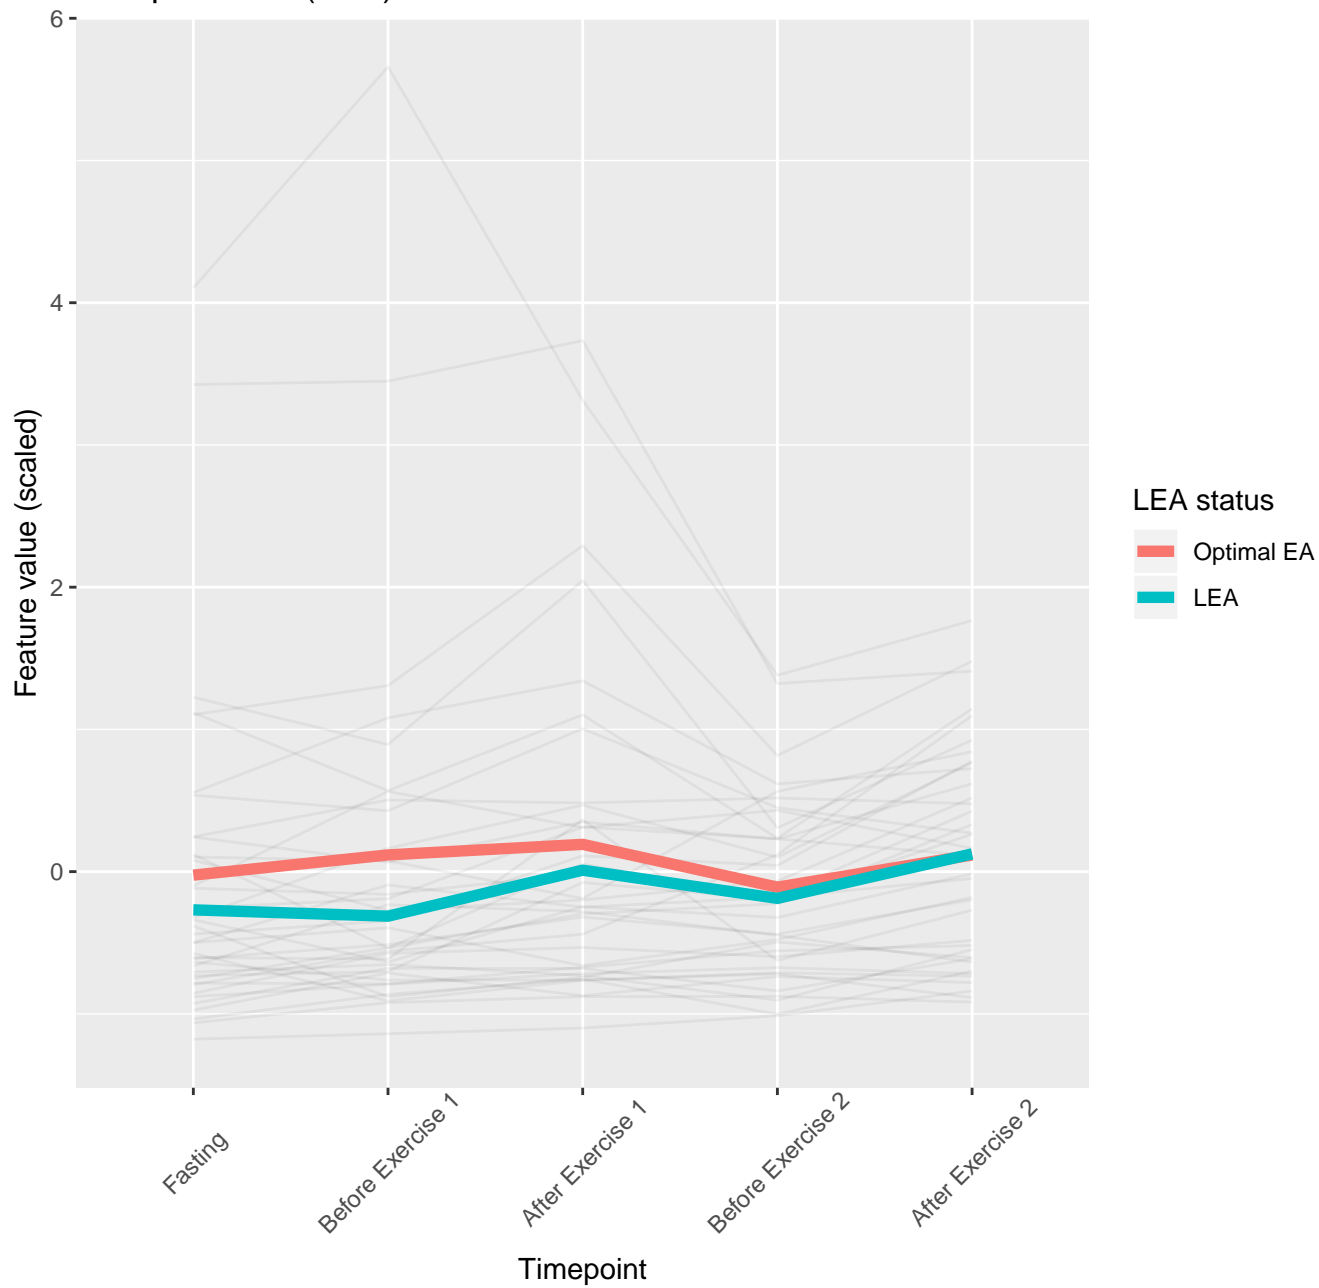



Line plot of TG(58:8)

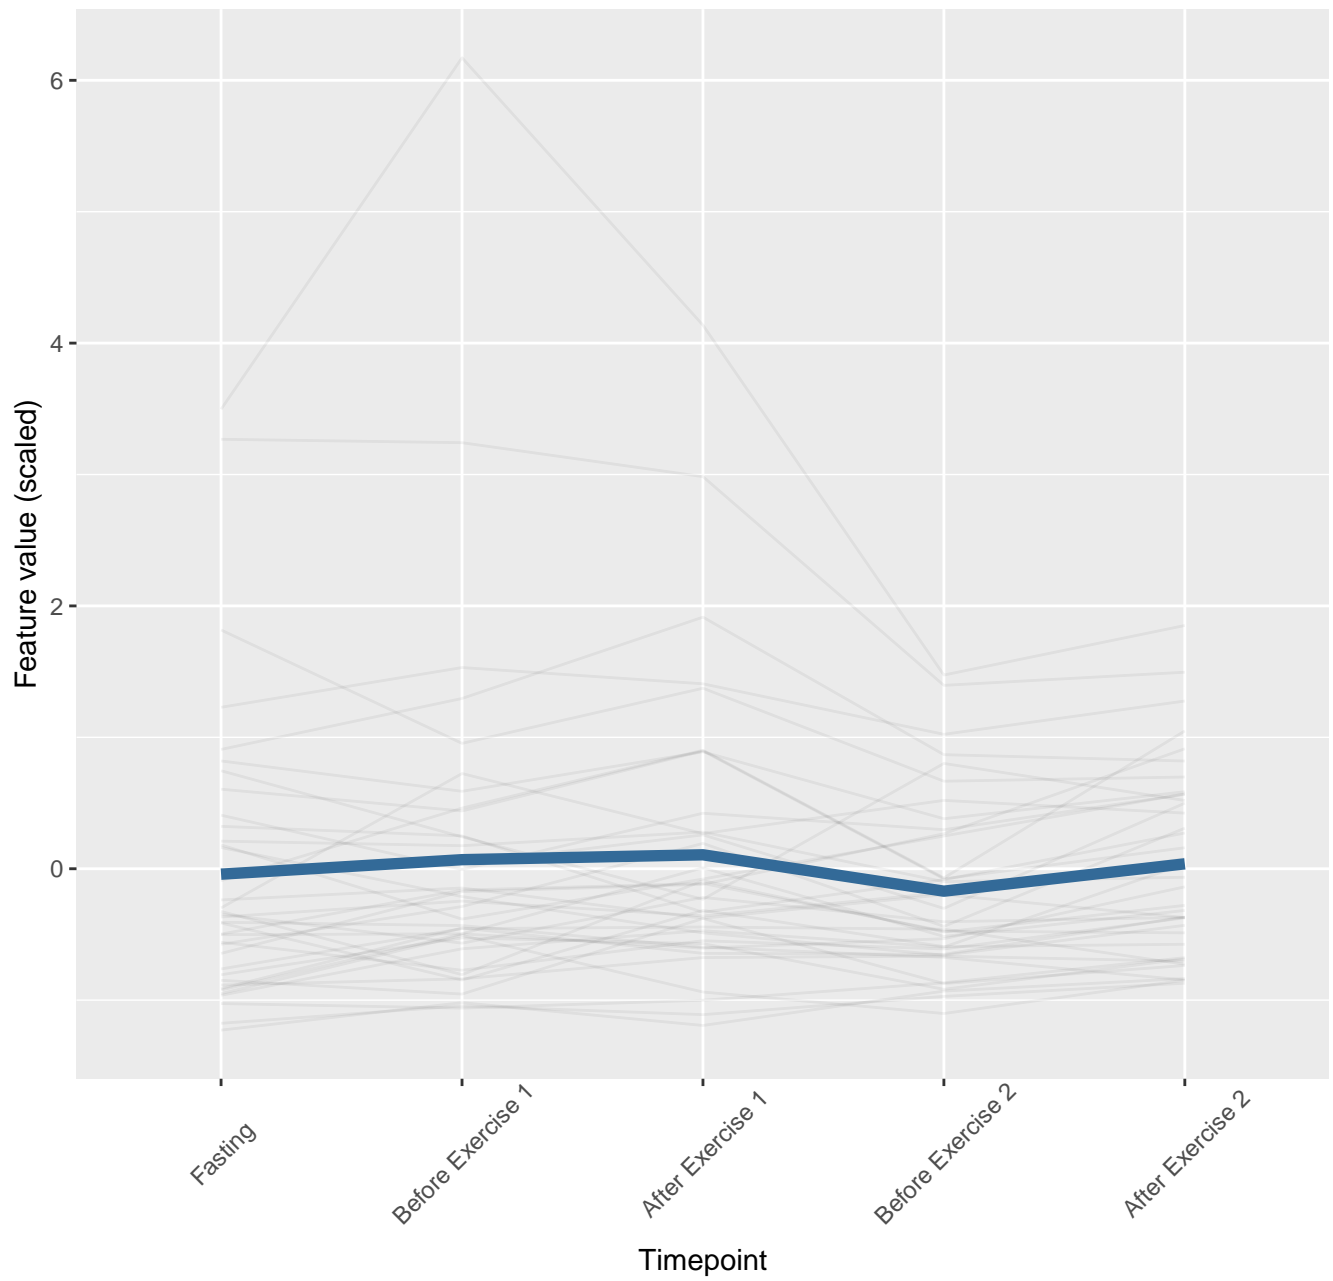

Line plot of TG(58:8)

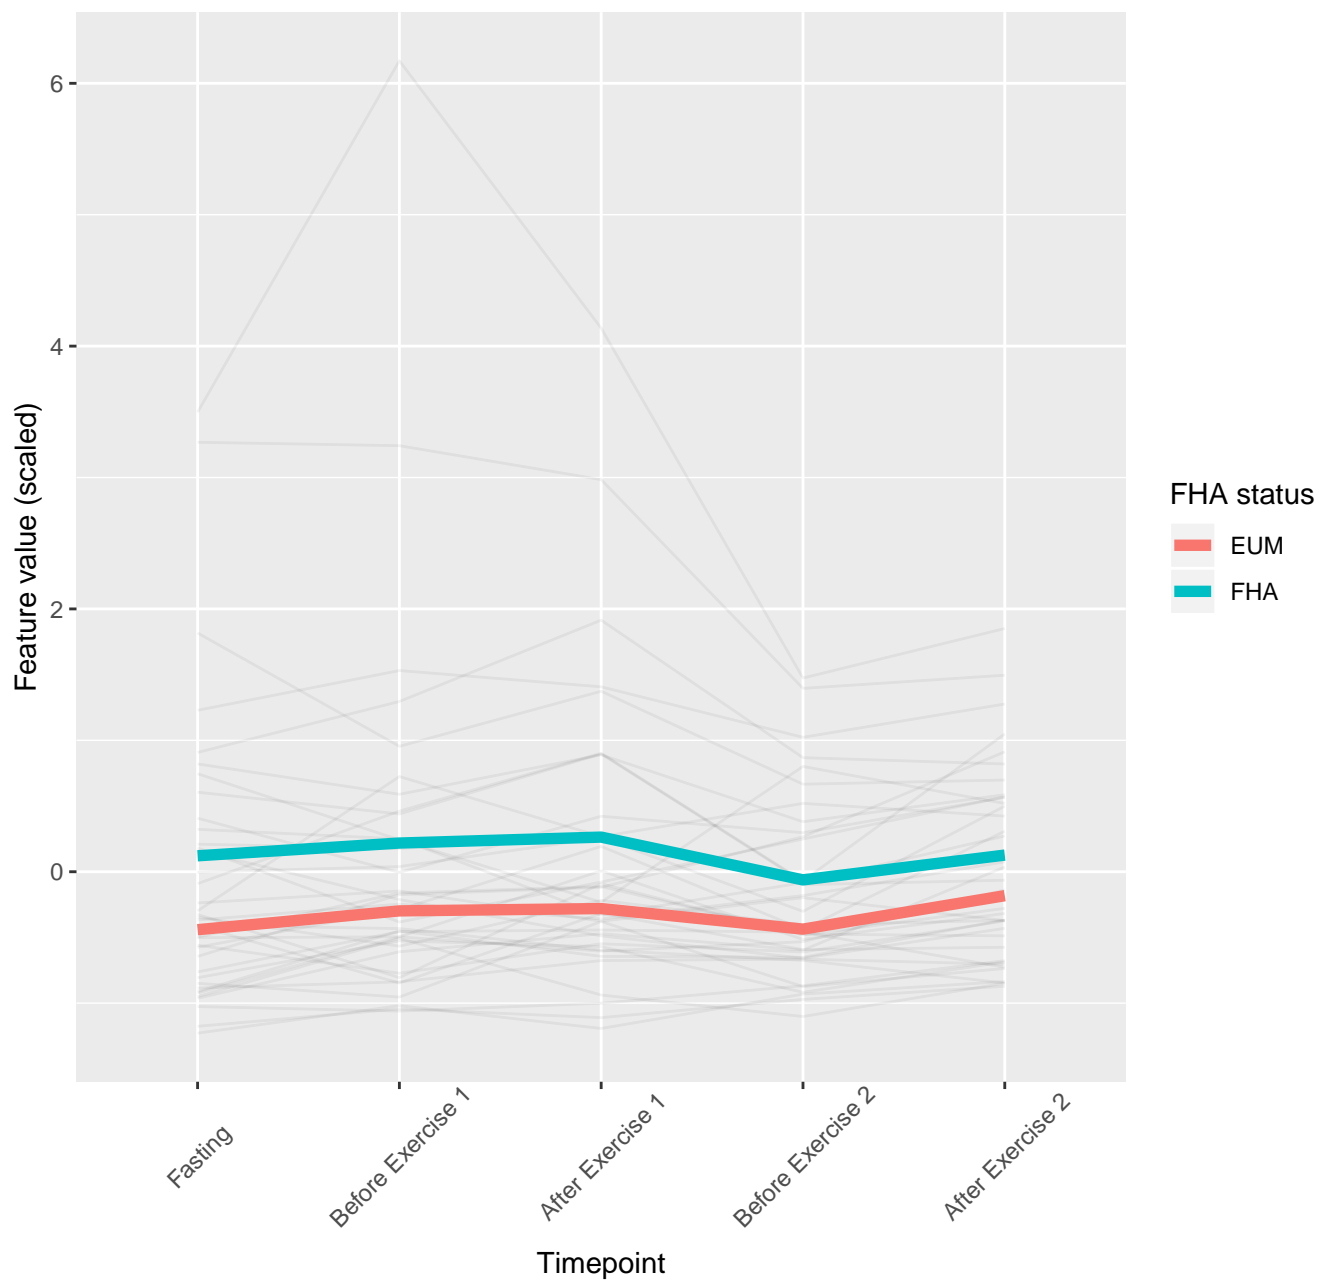

Line plot of TG(58:8)

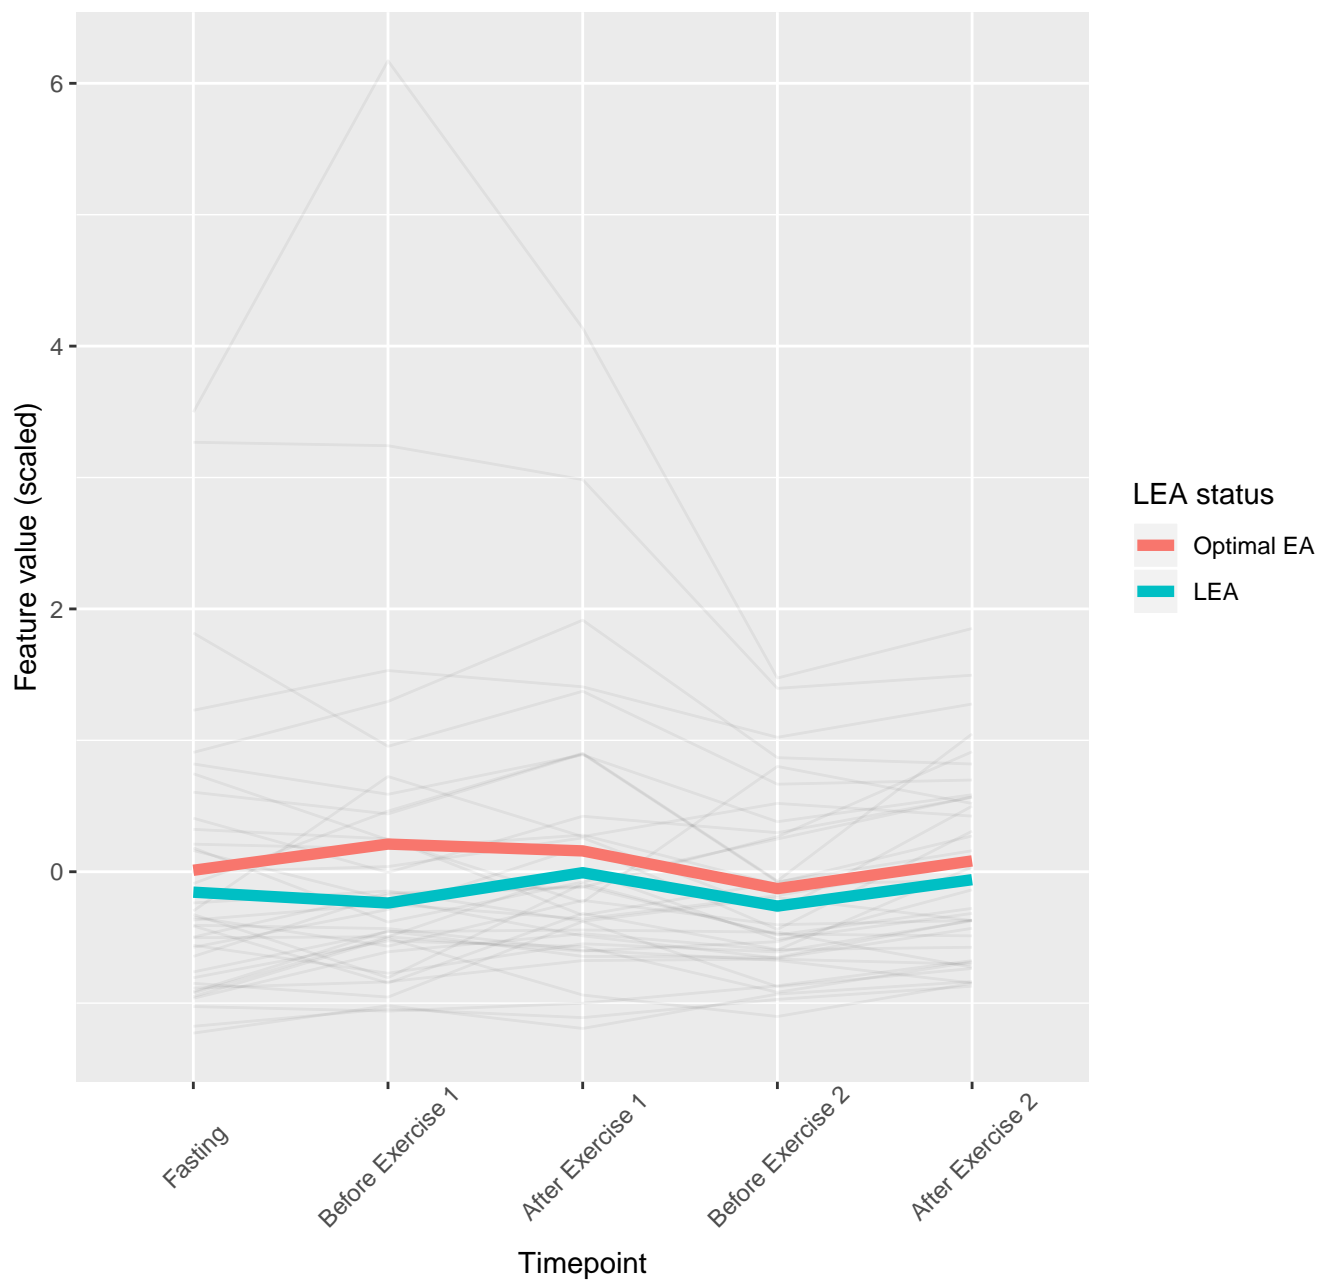

Line plot of TG(58:9)

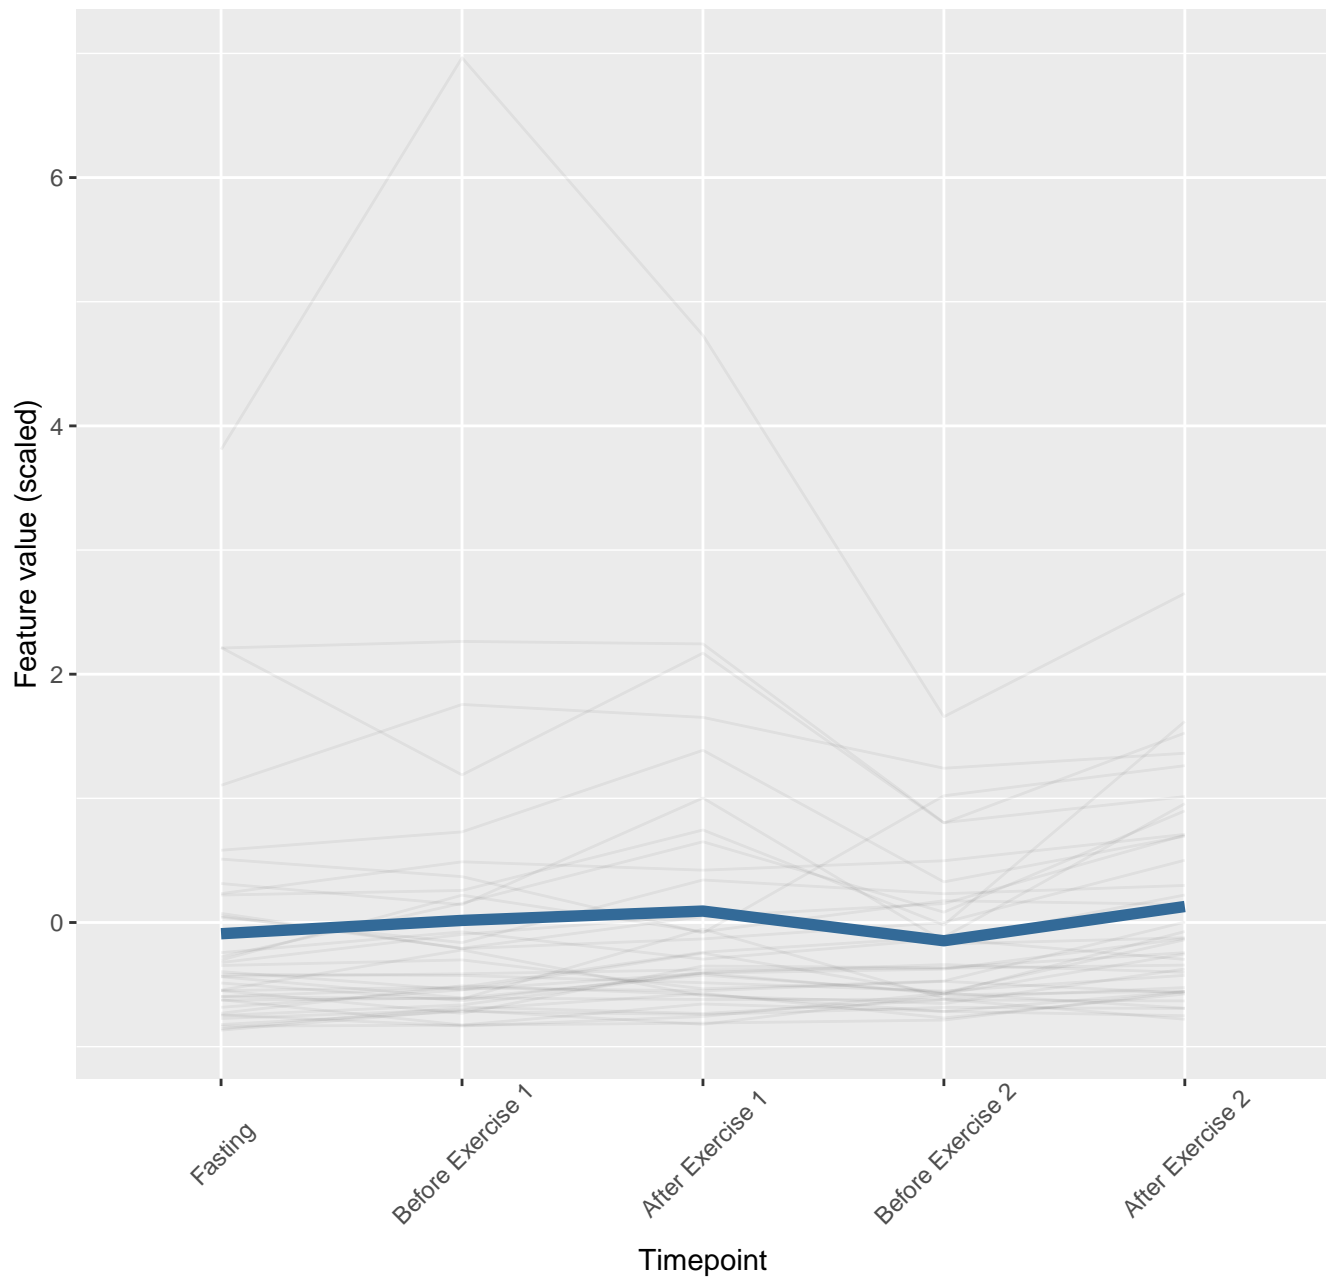

Line plot of TG(58:9)

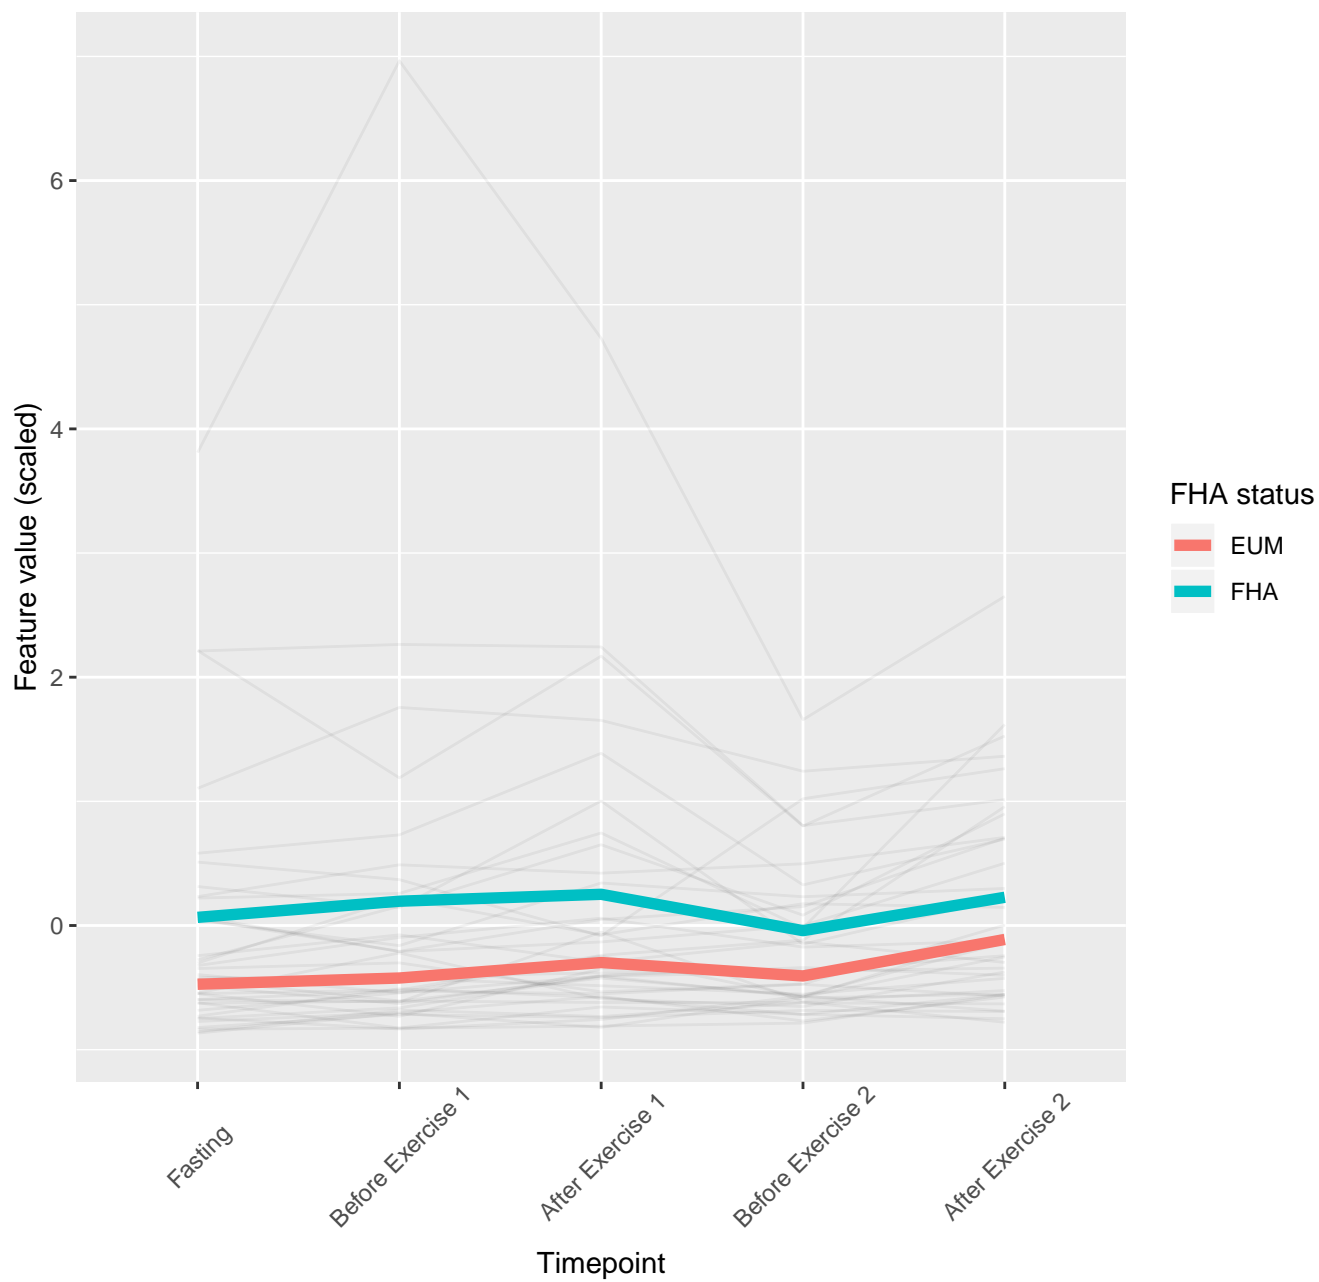

Line plot of TG(58:9)

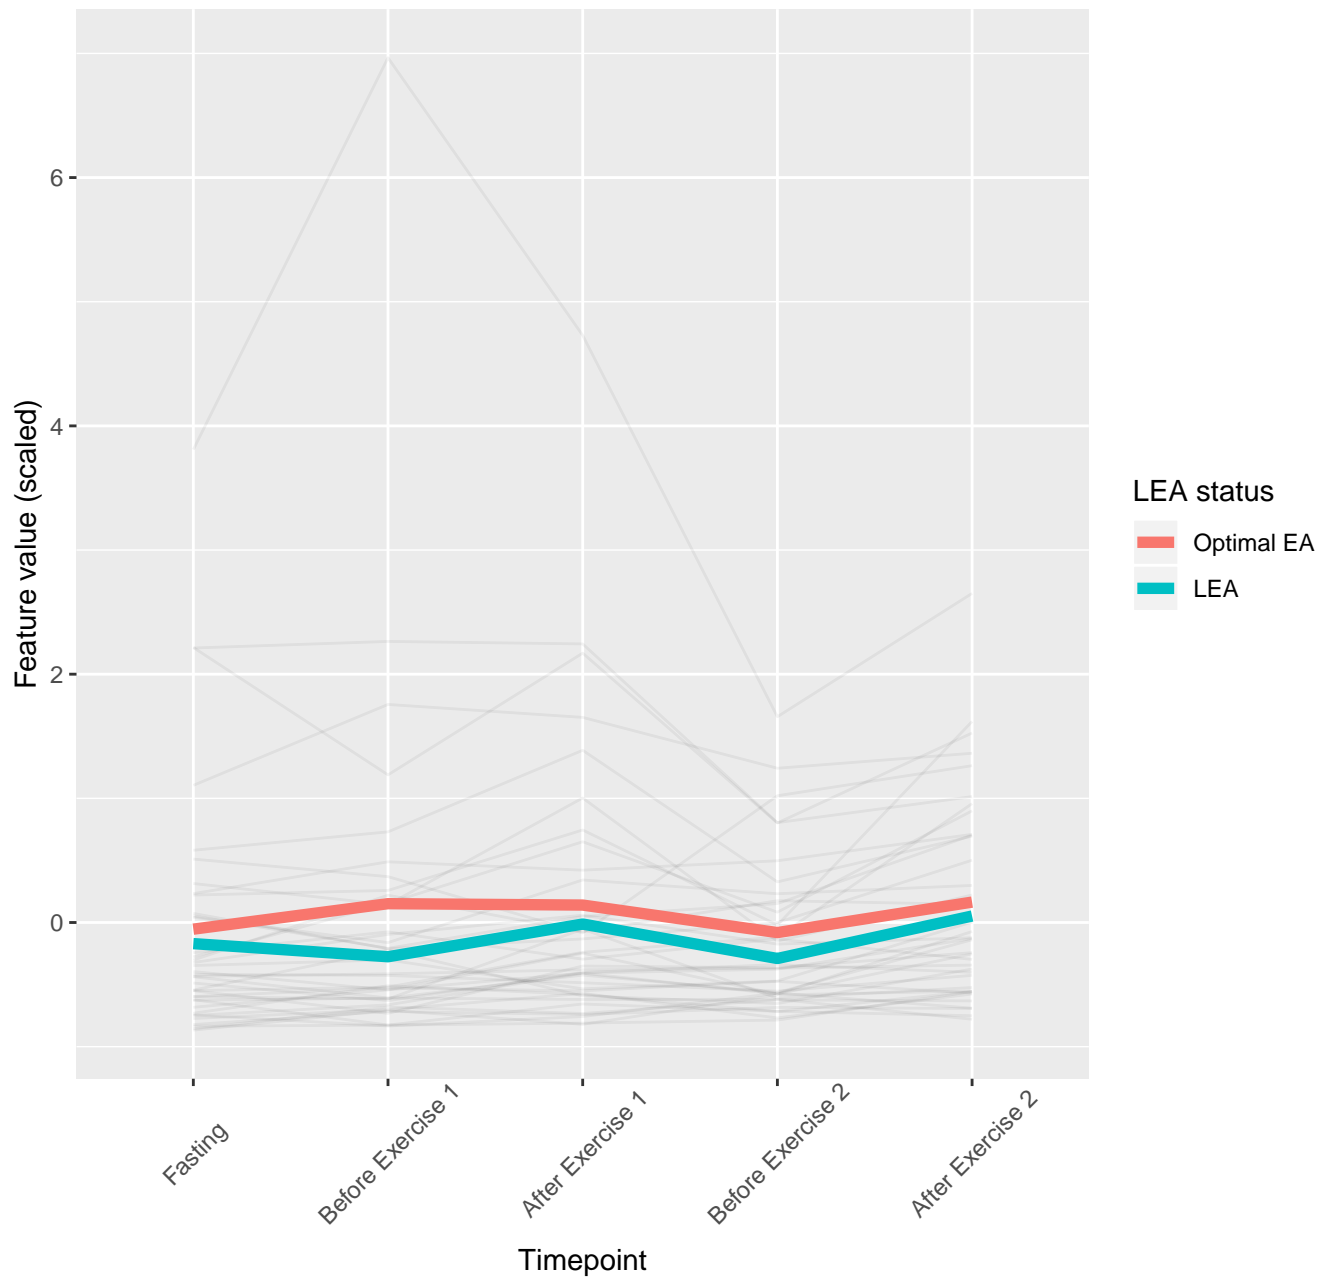

Line plot of TG(60:10)

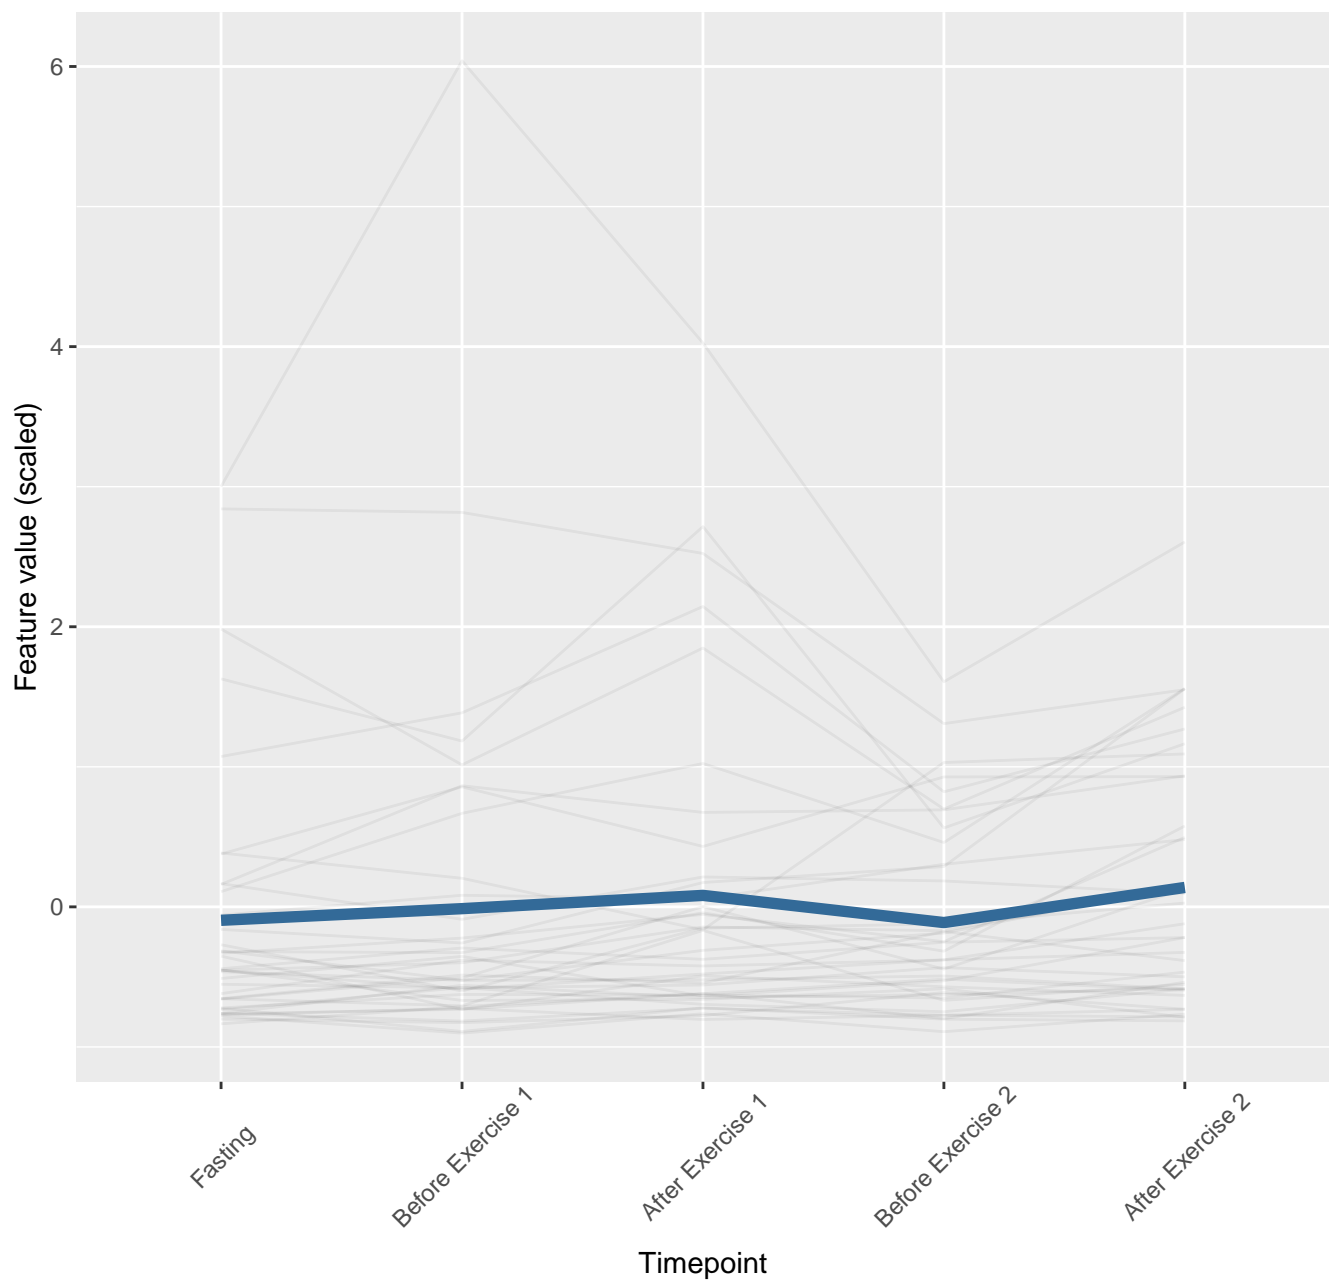

Line plot of TG(60:10)

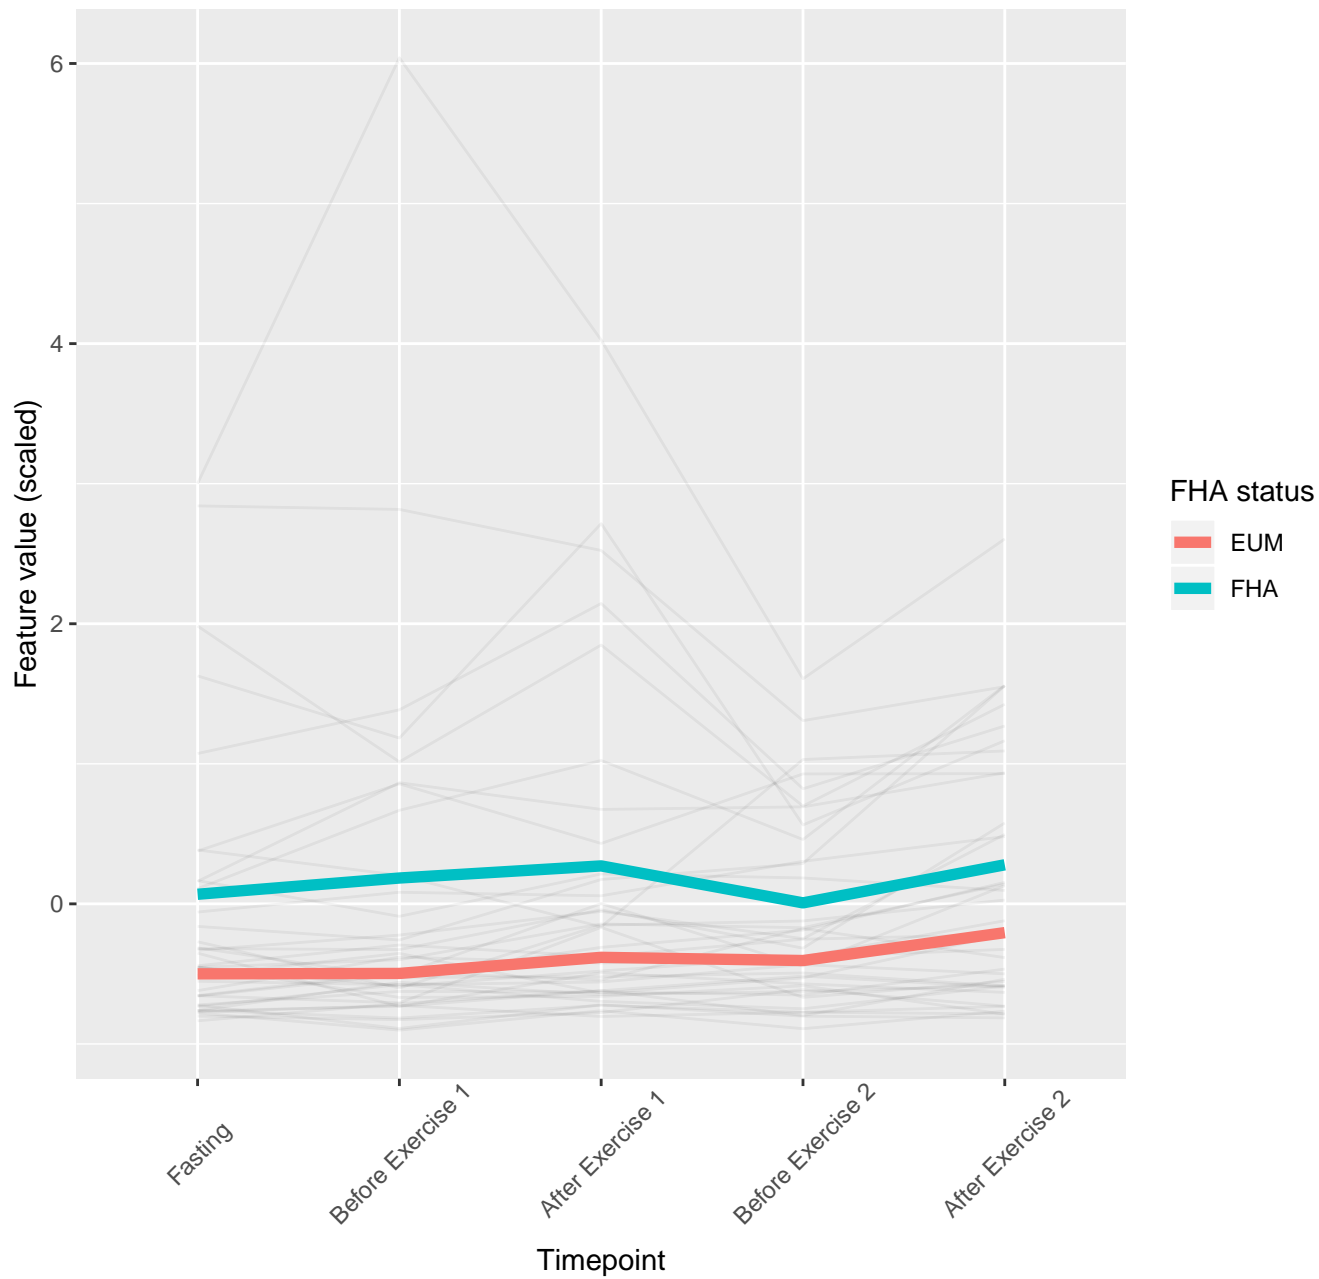



Line plot of TG(60:10)

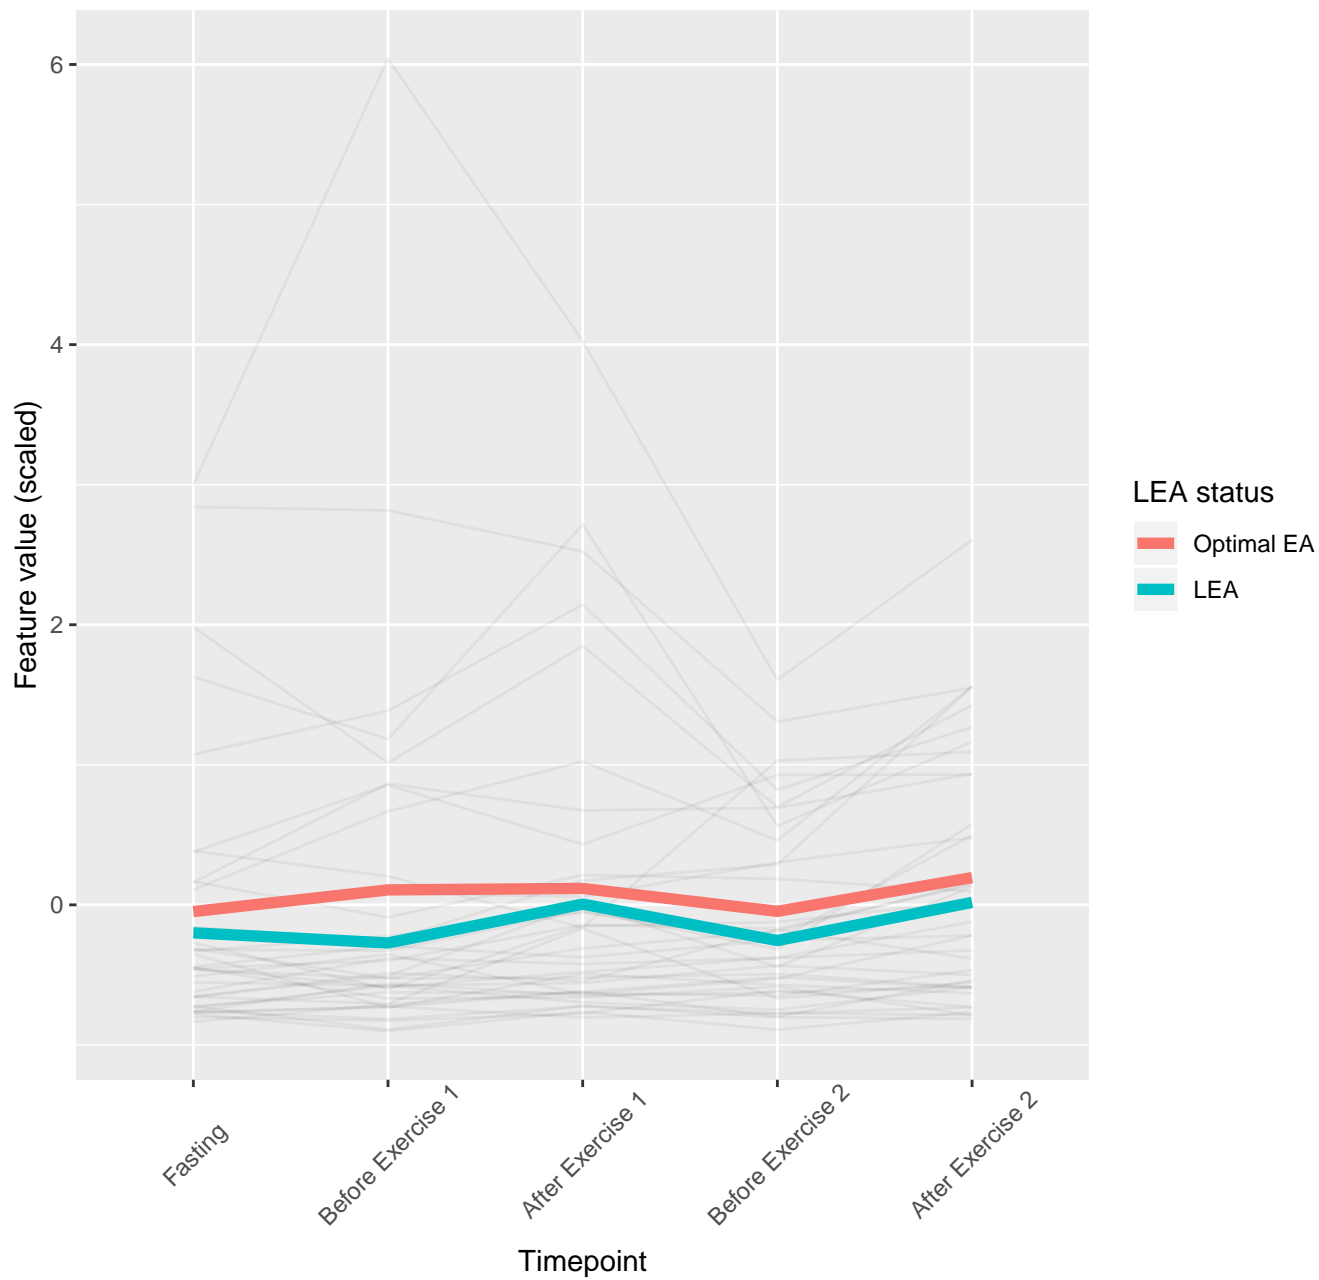

Line plot of TG(60:11)

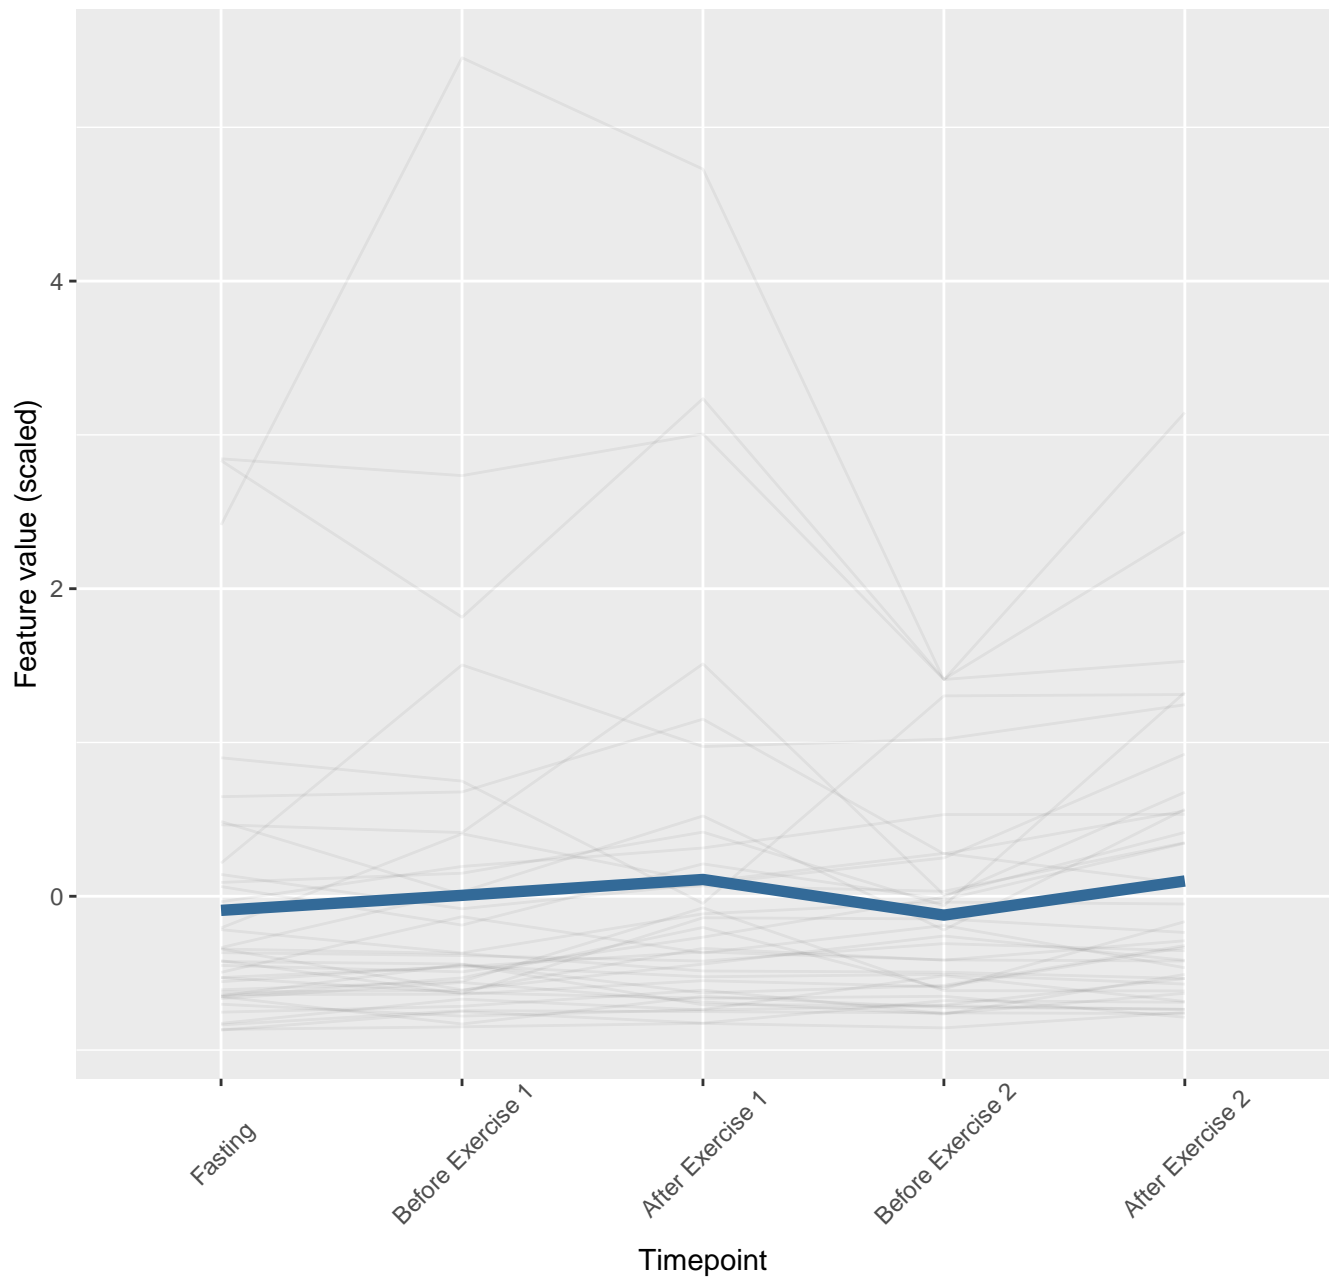

Line plot of TG(60:11)

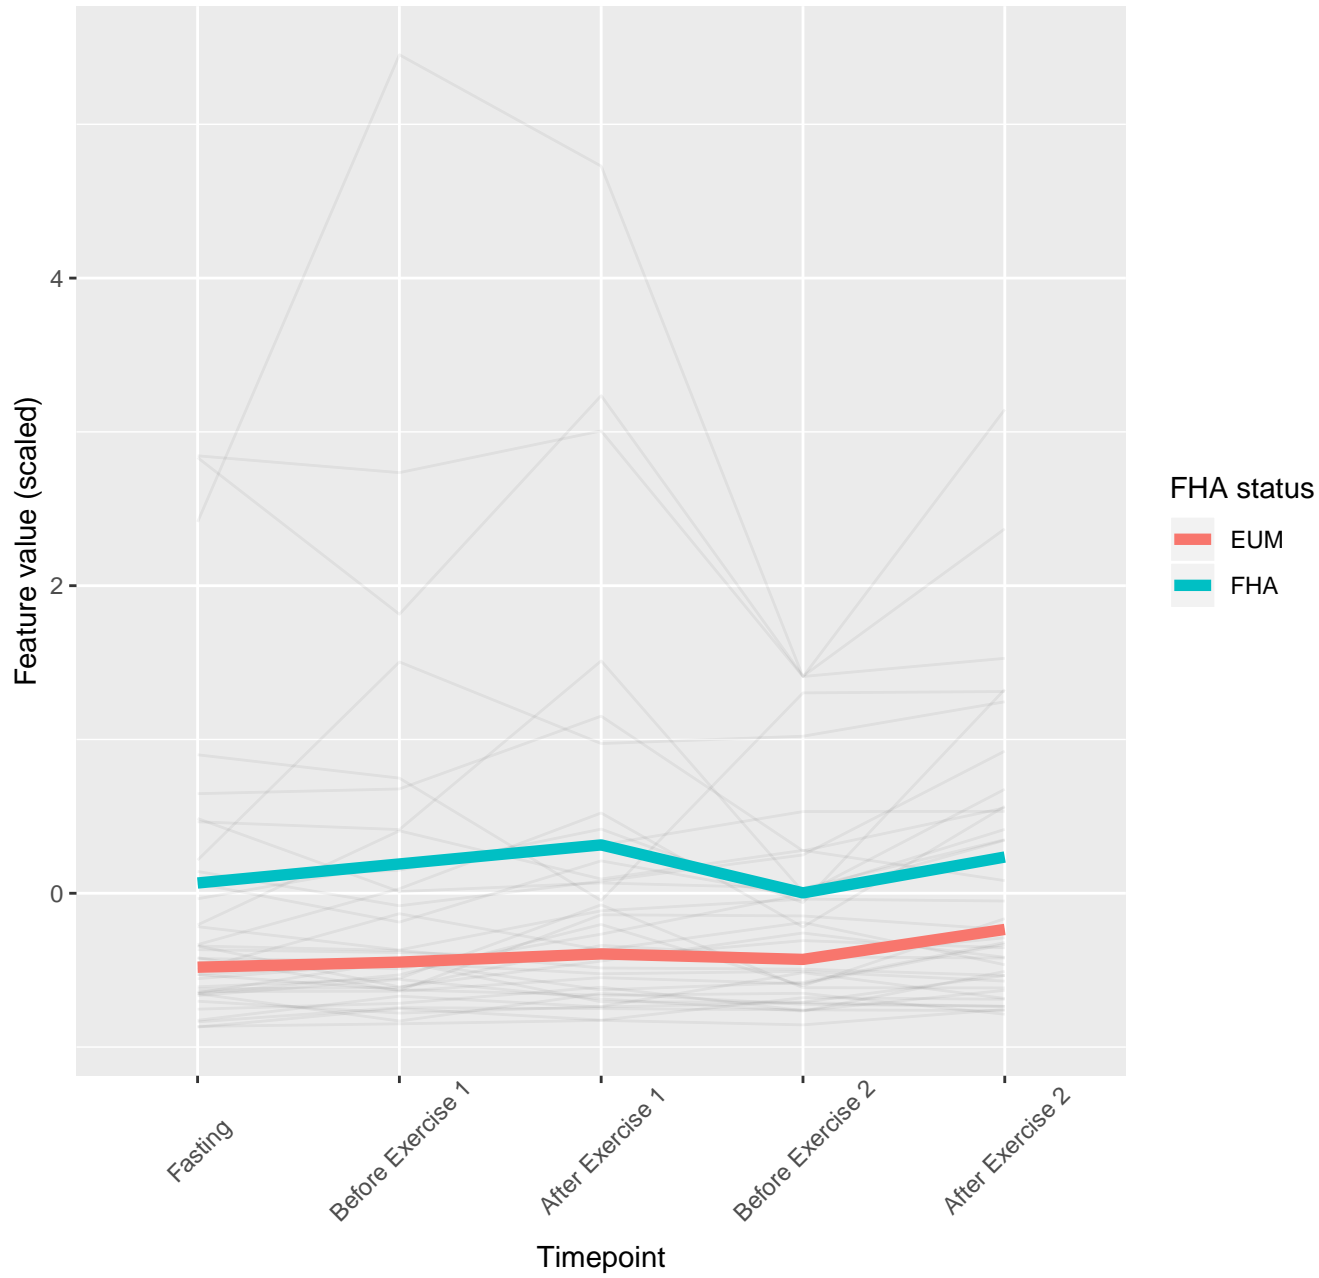

Line plot of TG(60:11)

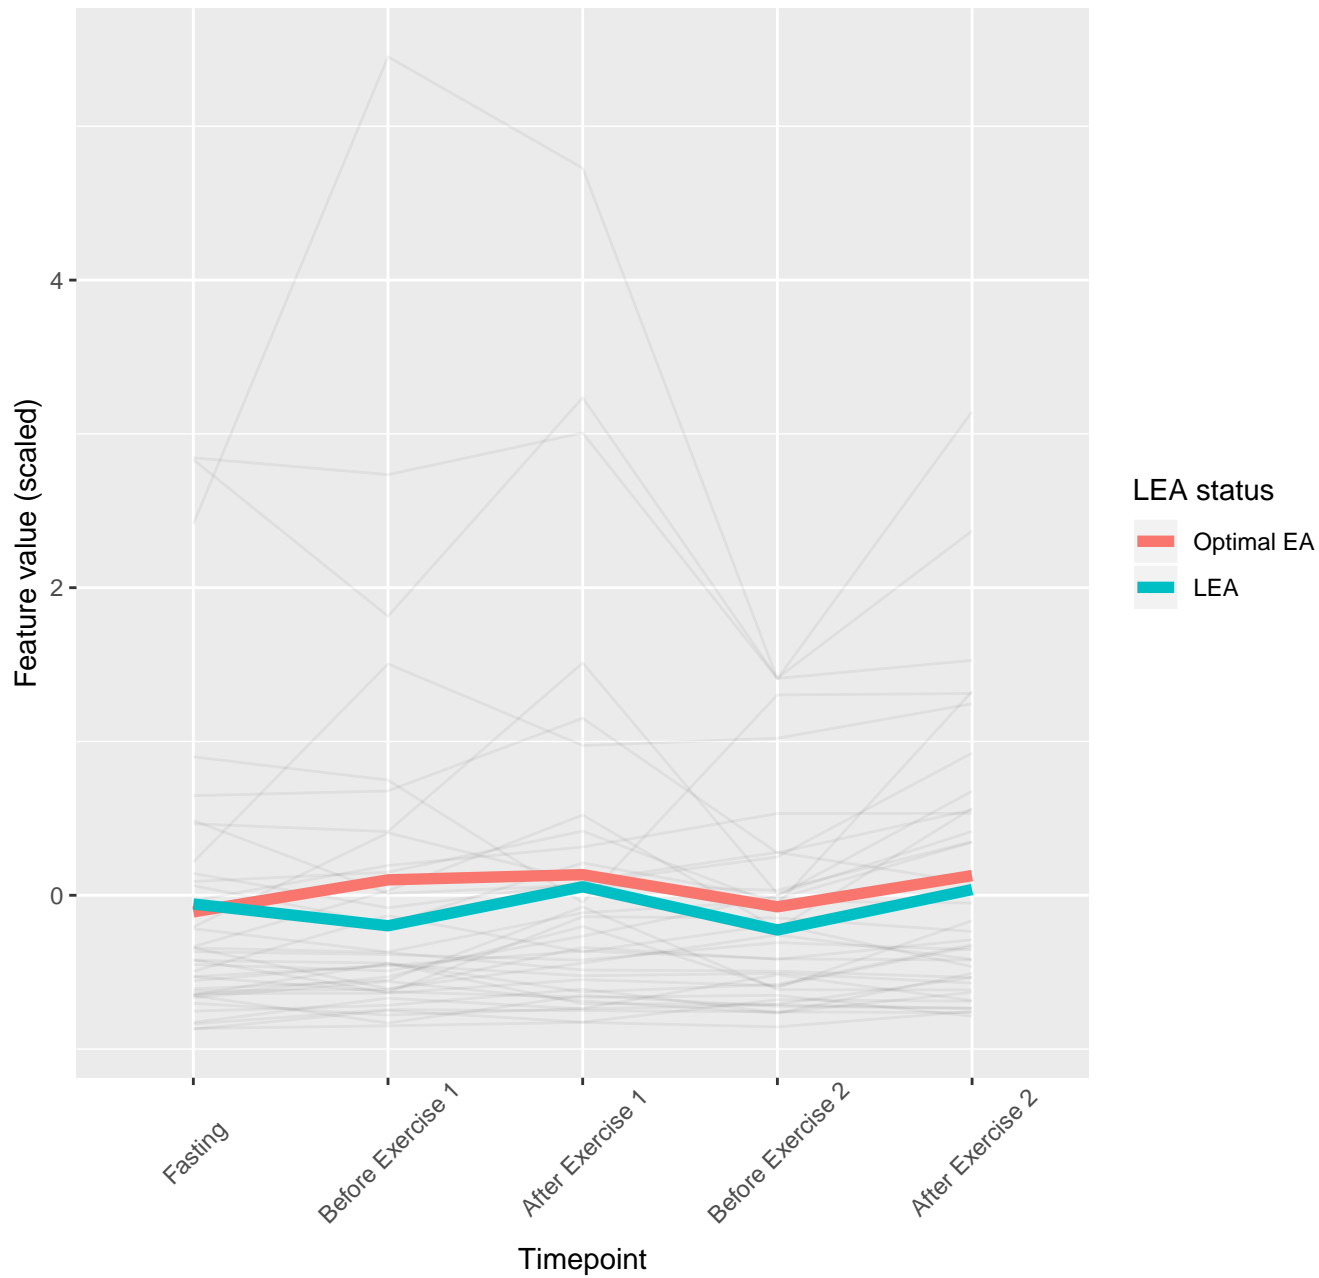

Line plot of TG(60:12)

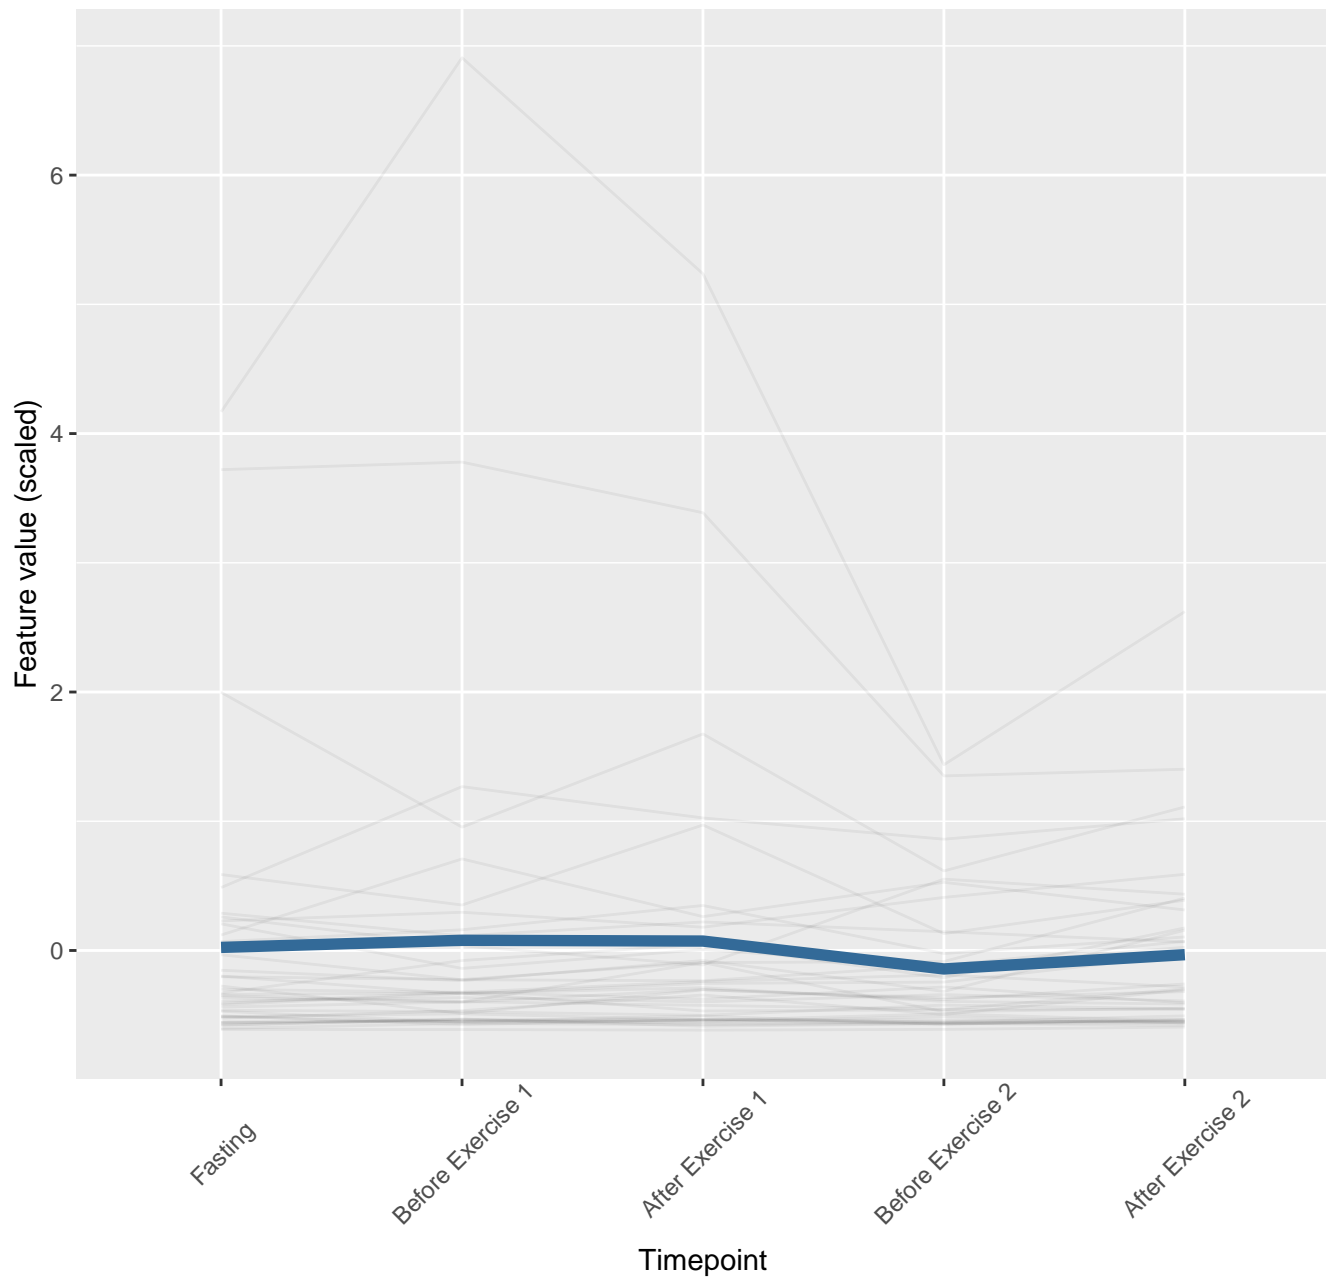

Line plot of TG(60:12)

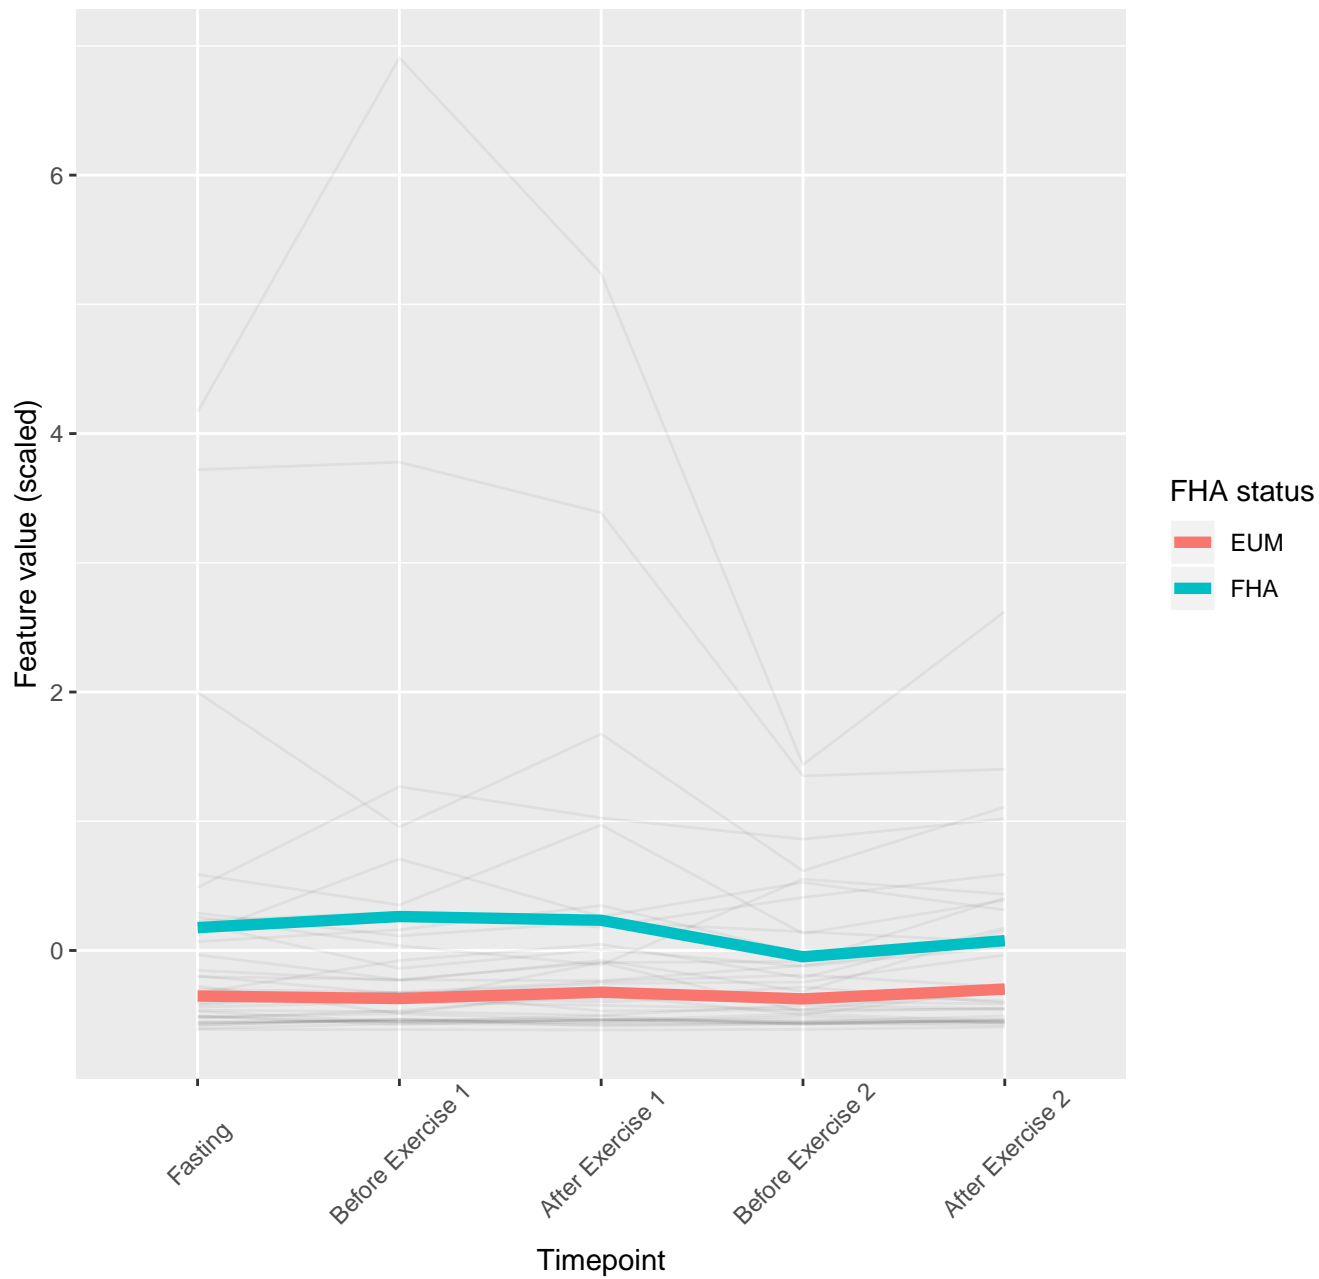

Line plot of TG(60:12)

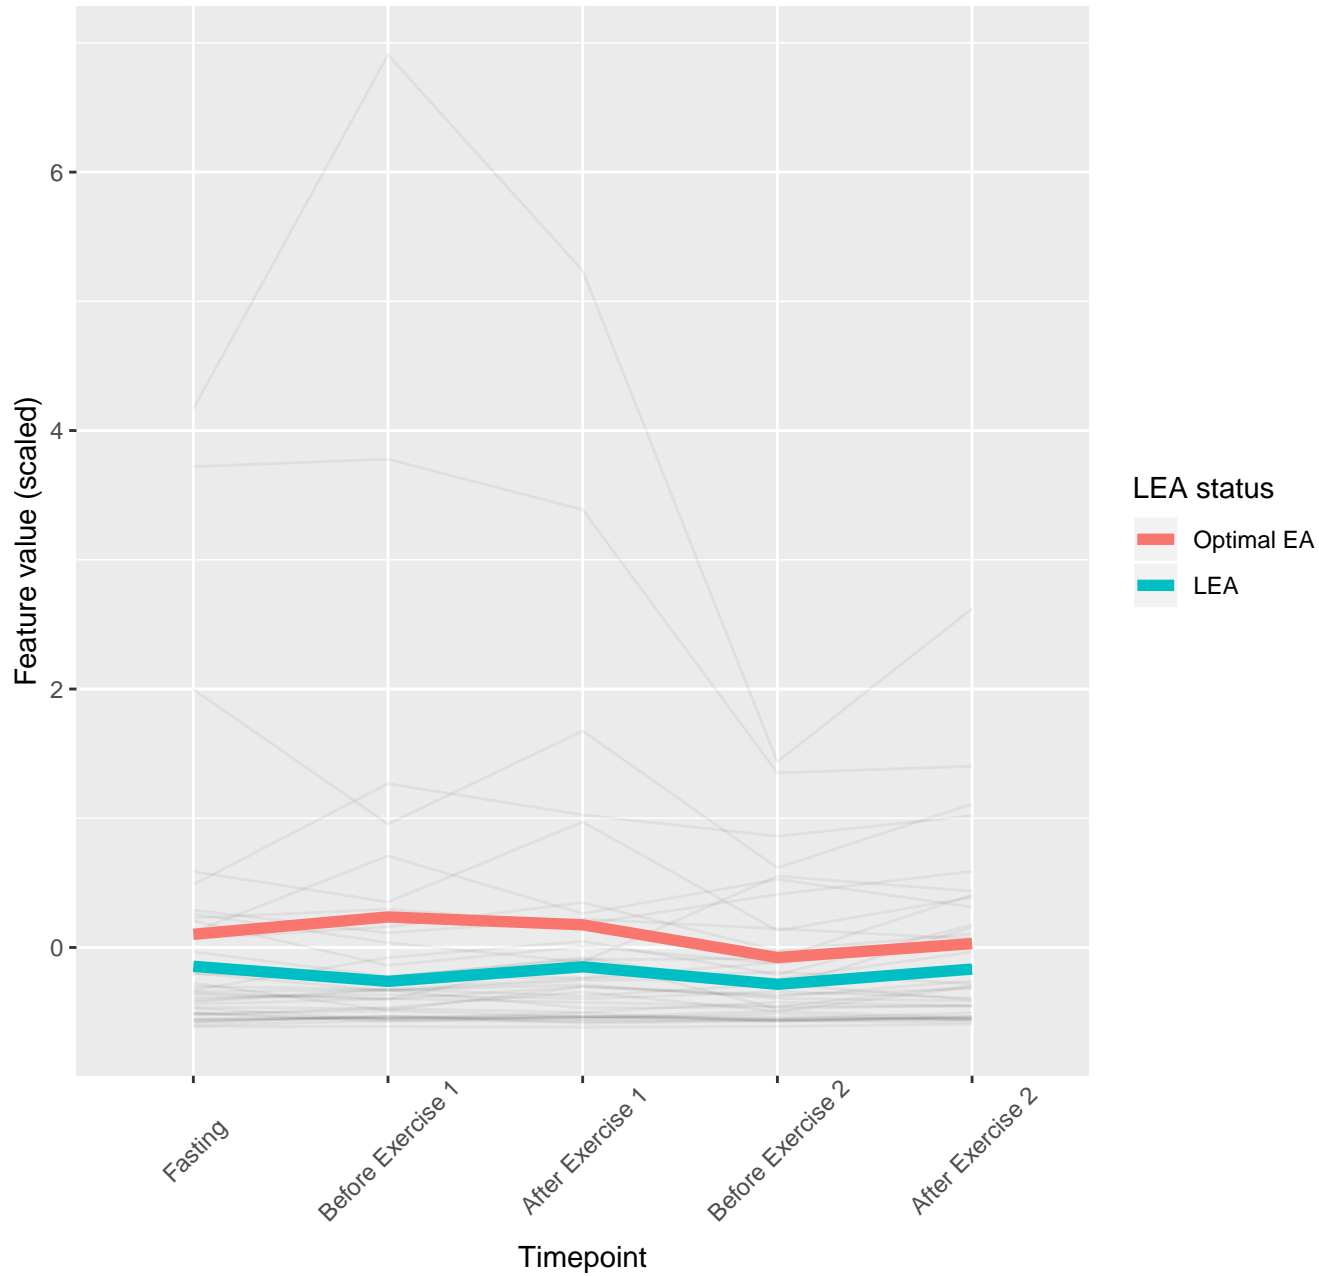

Line plot of TG(60:7)

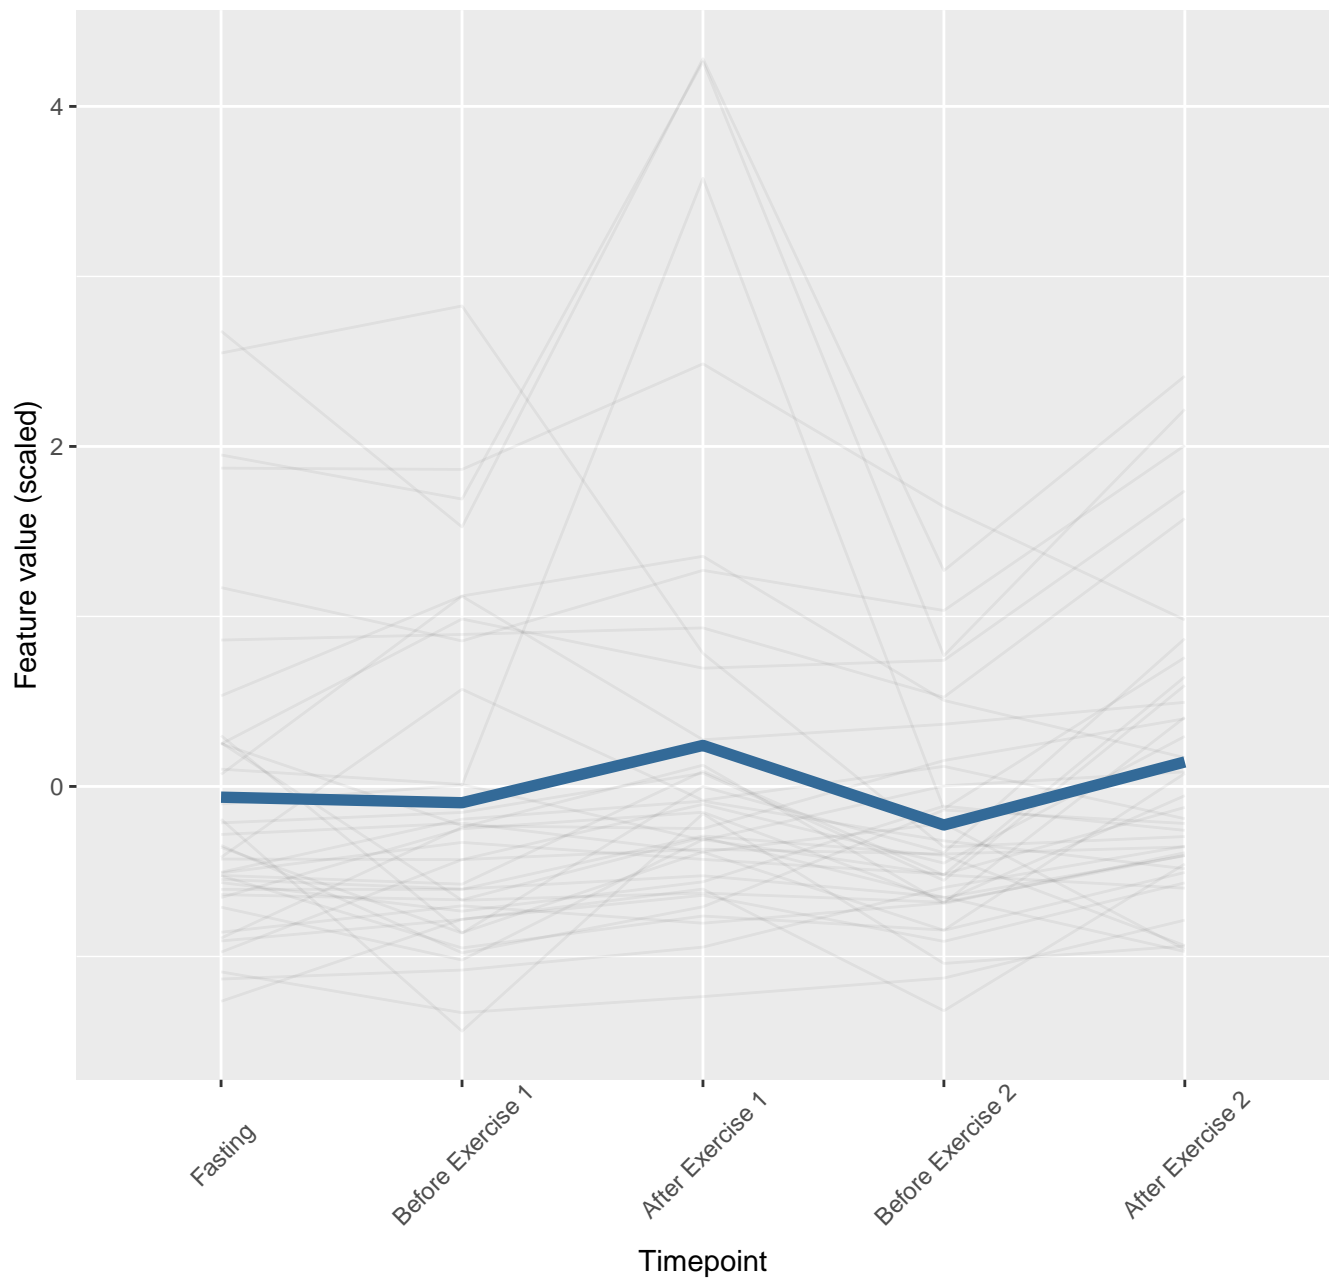



Line plot of TG(60:7)

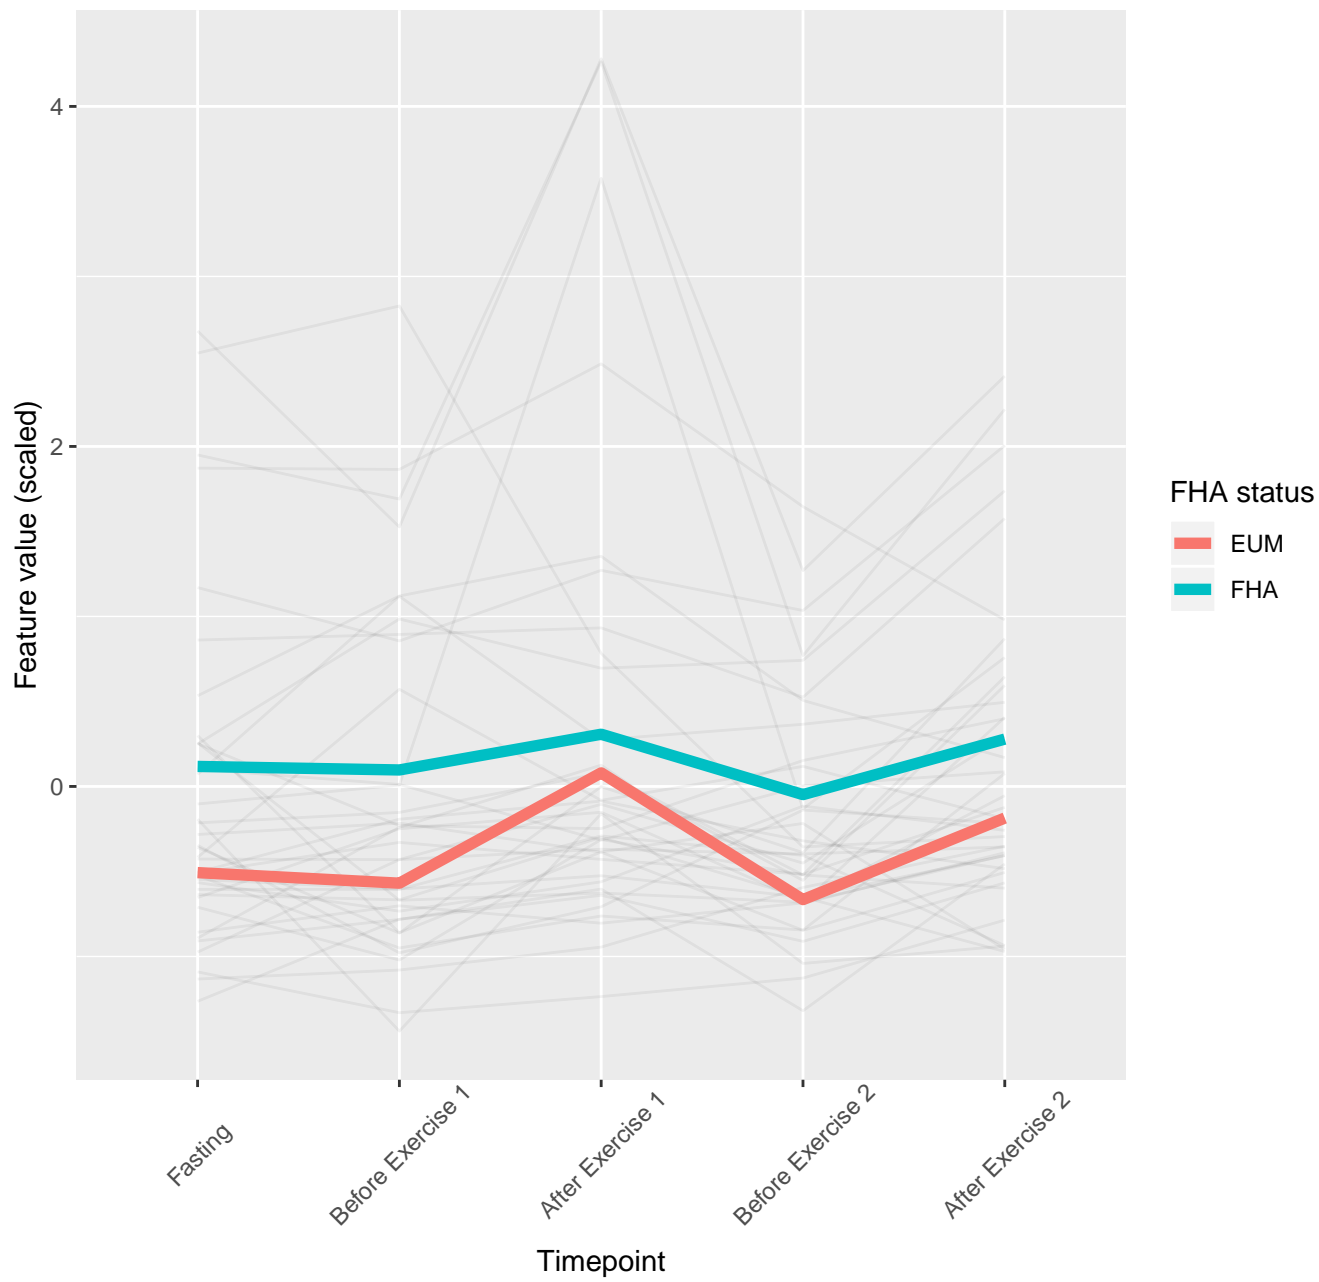

Line plot of TG(60:7)

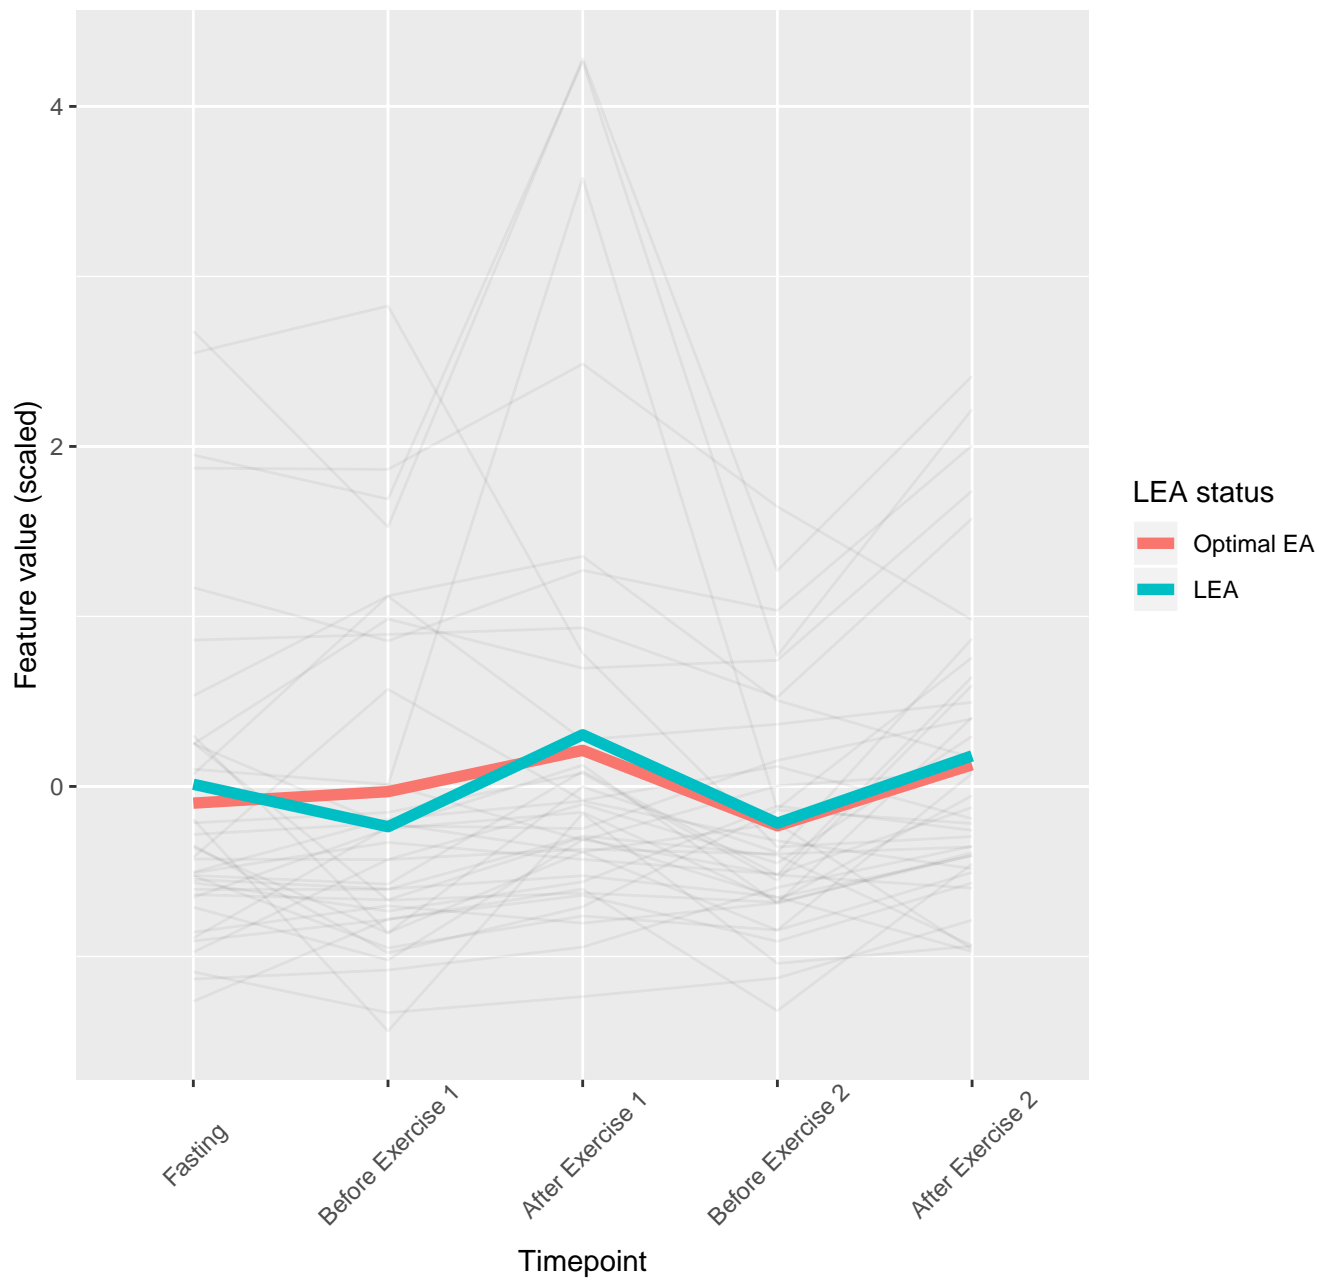

Line plot of TG(60:9)

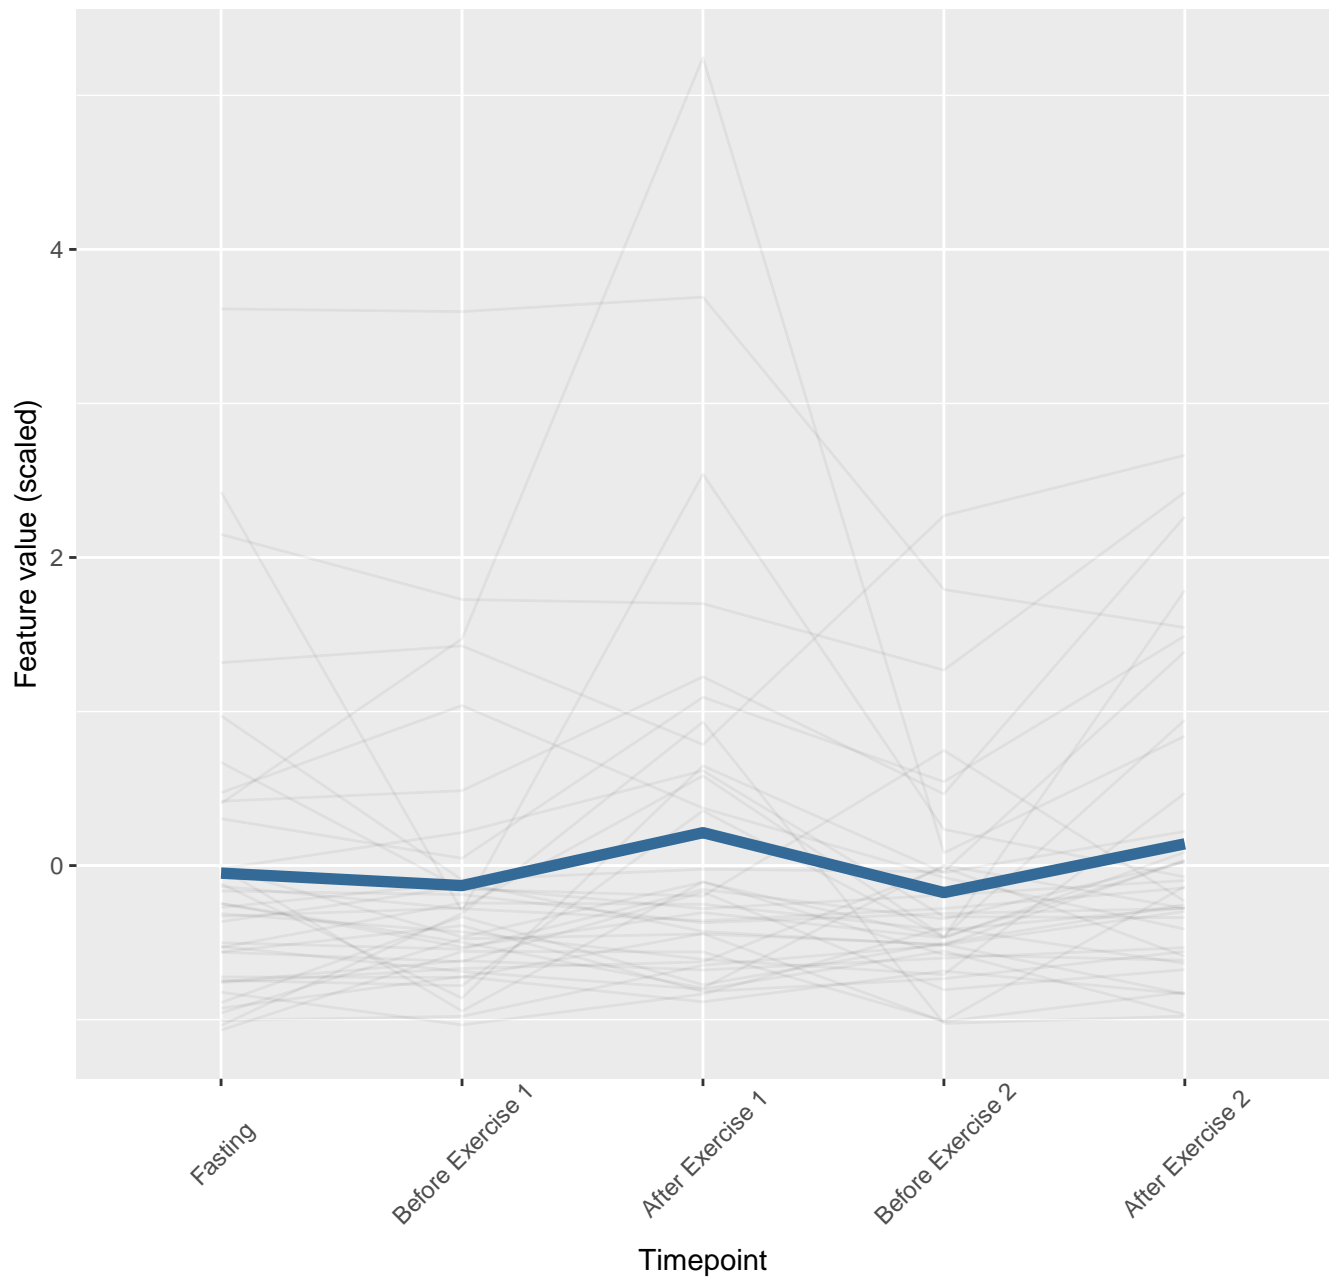

Line plot of TG(60:9)

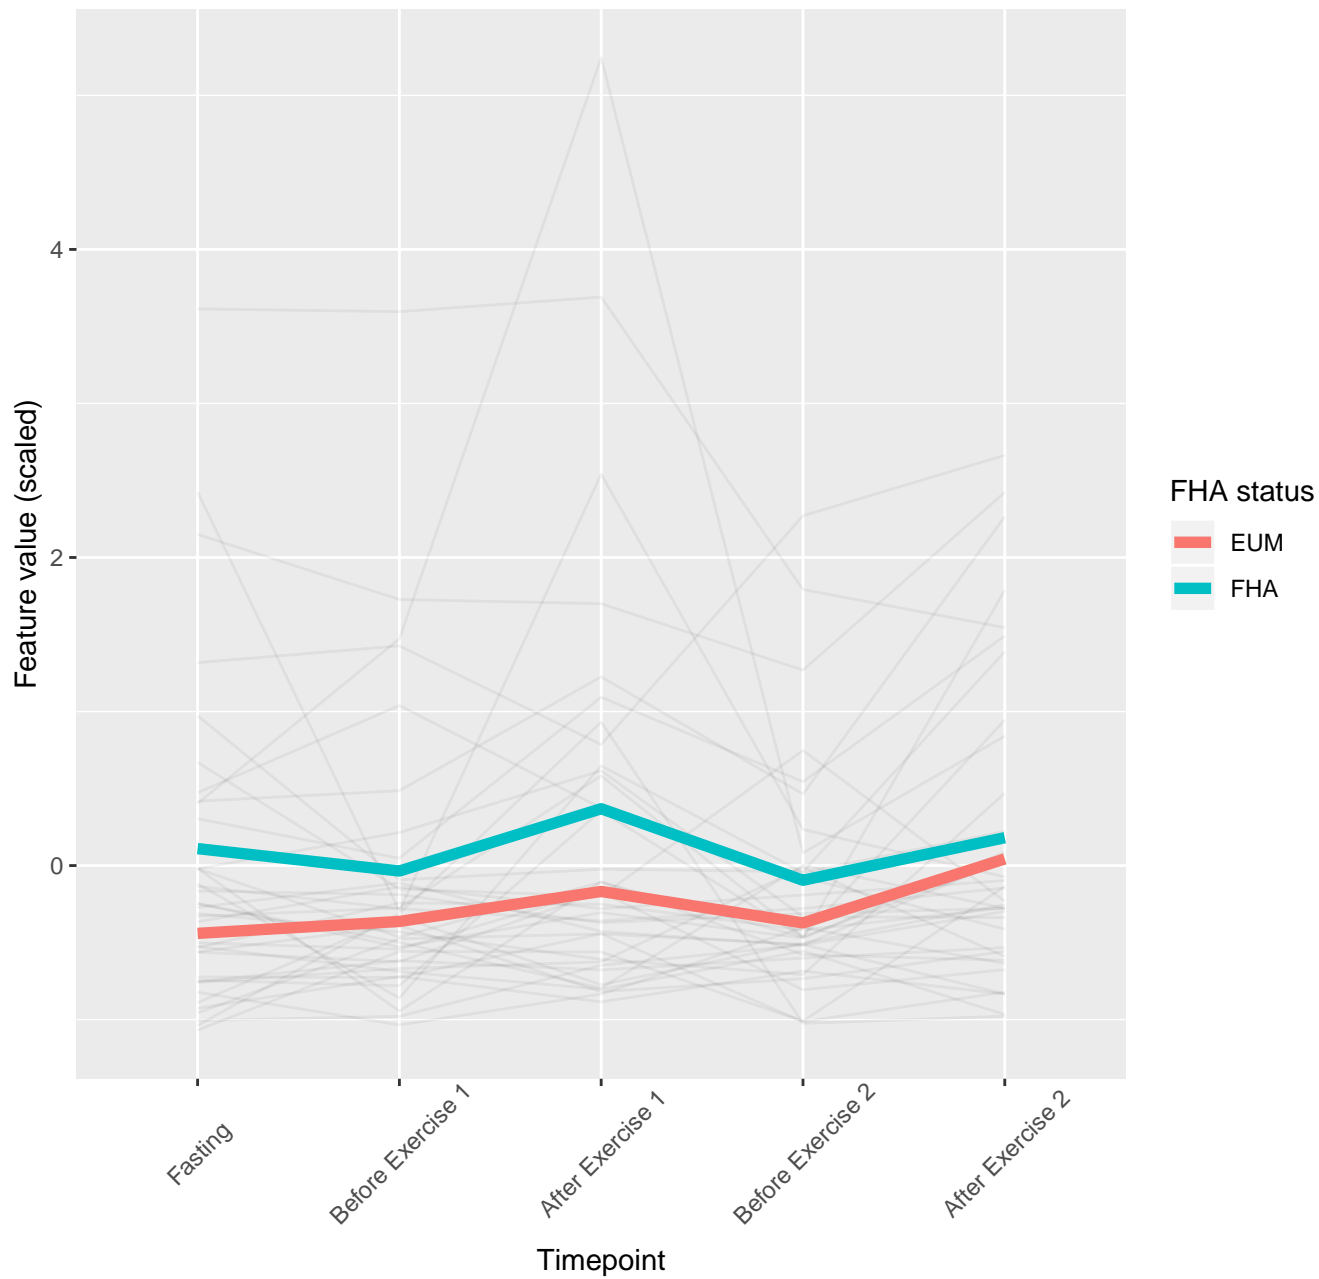

Line plot of TG(60:9)

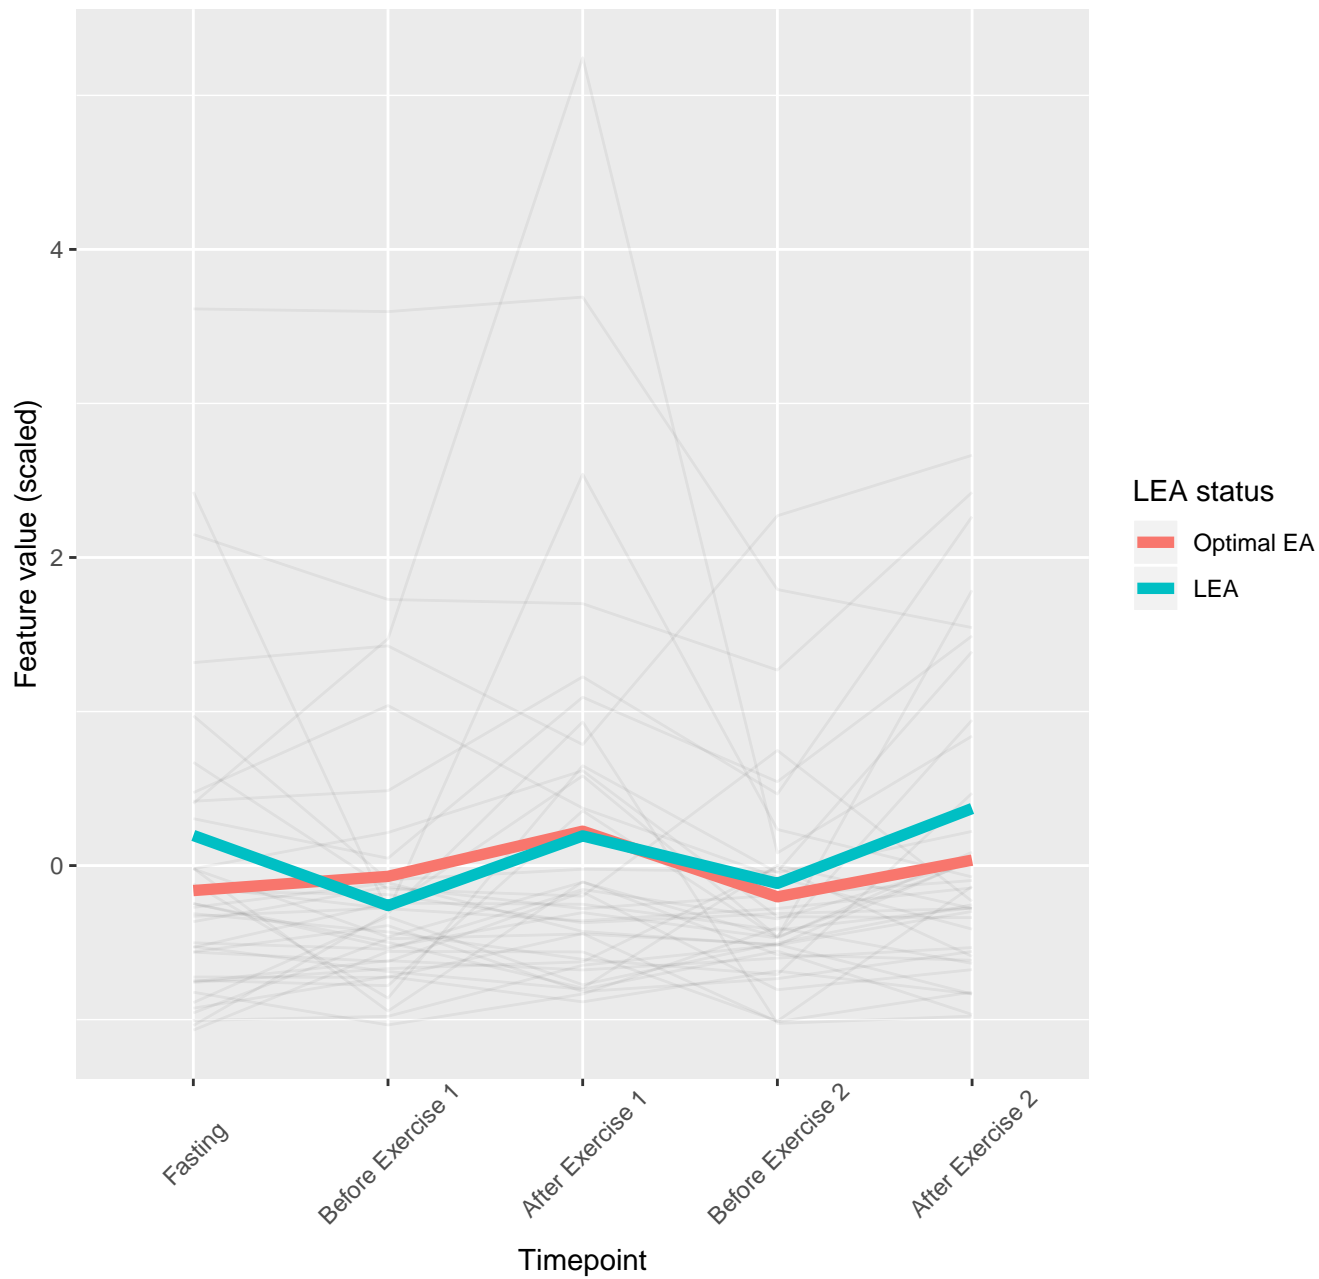



Line plot of TG(62:13)

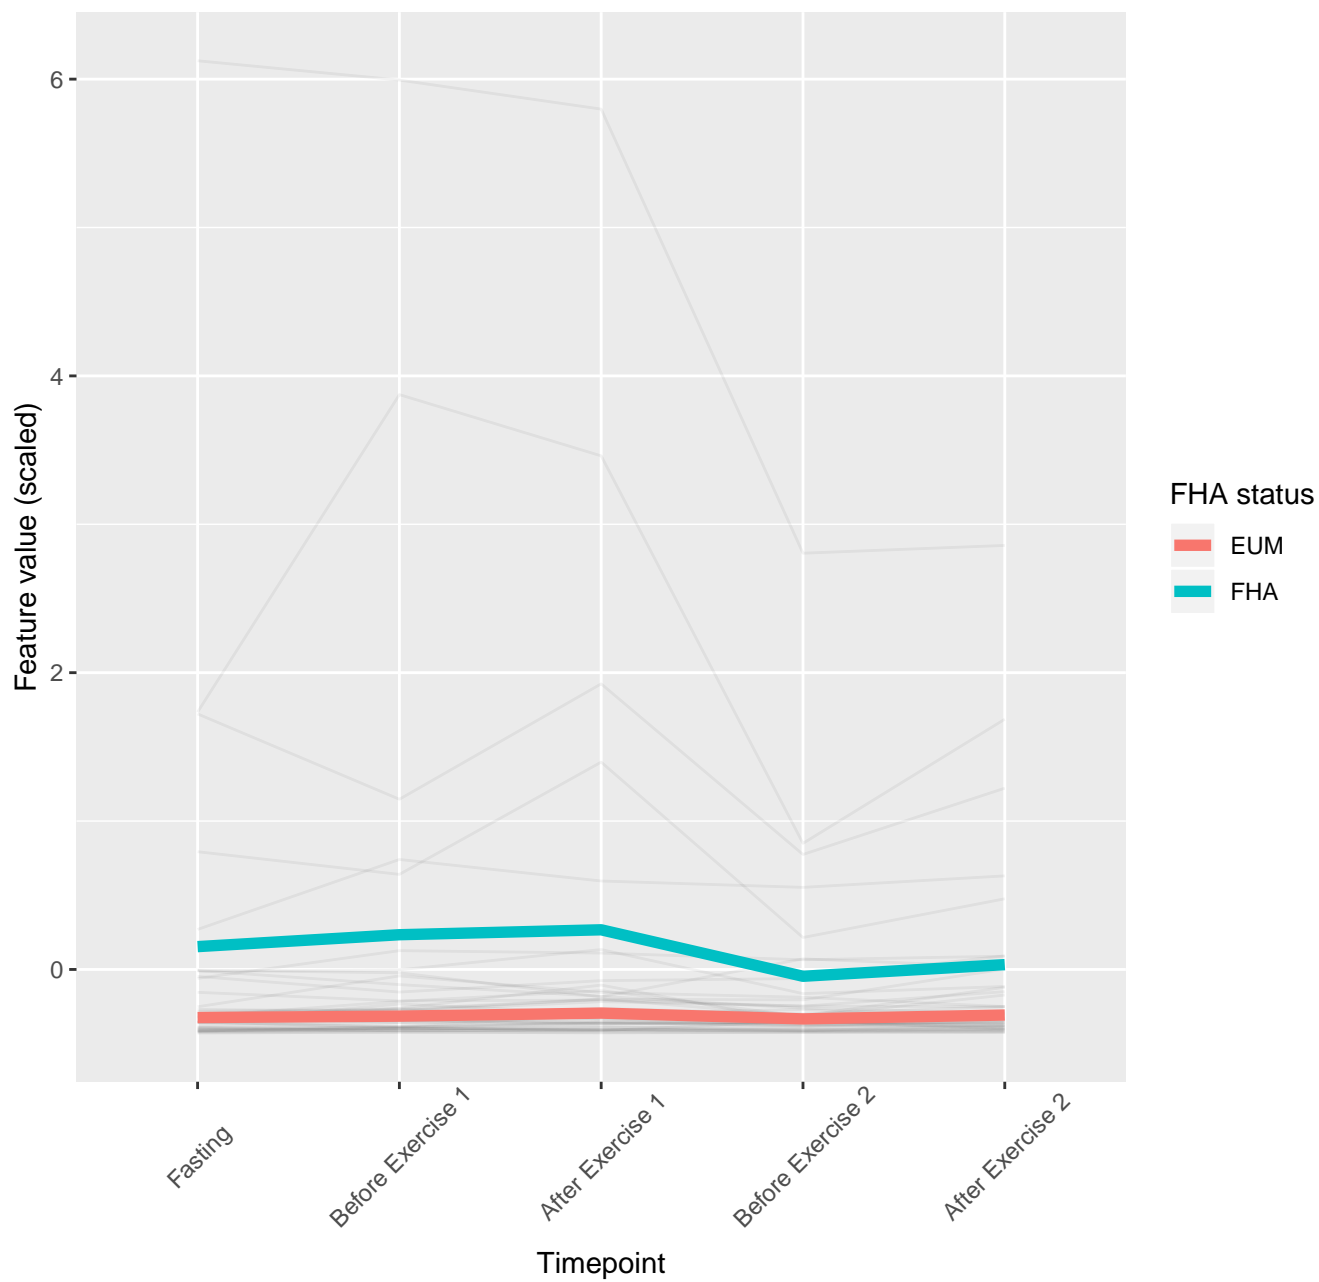

Line plot of TG(62:13)

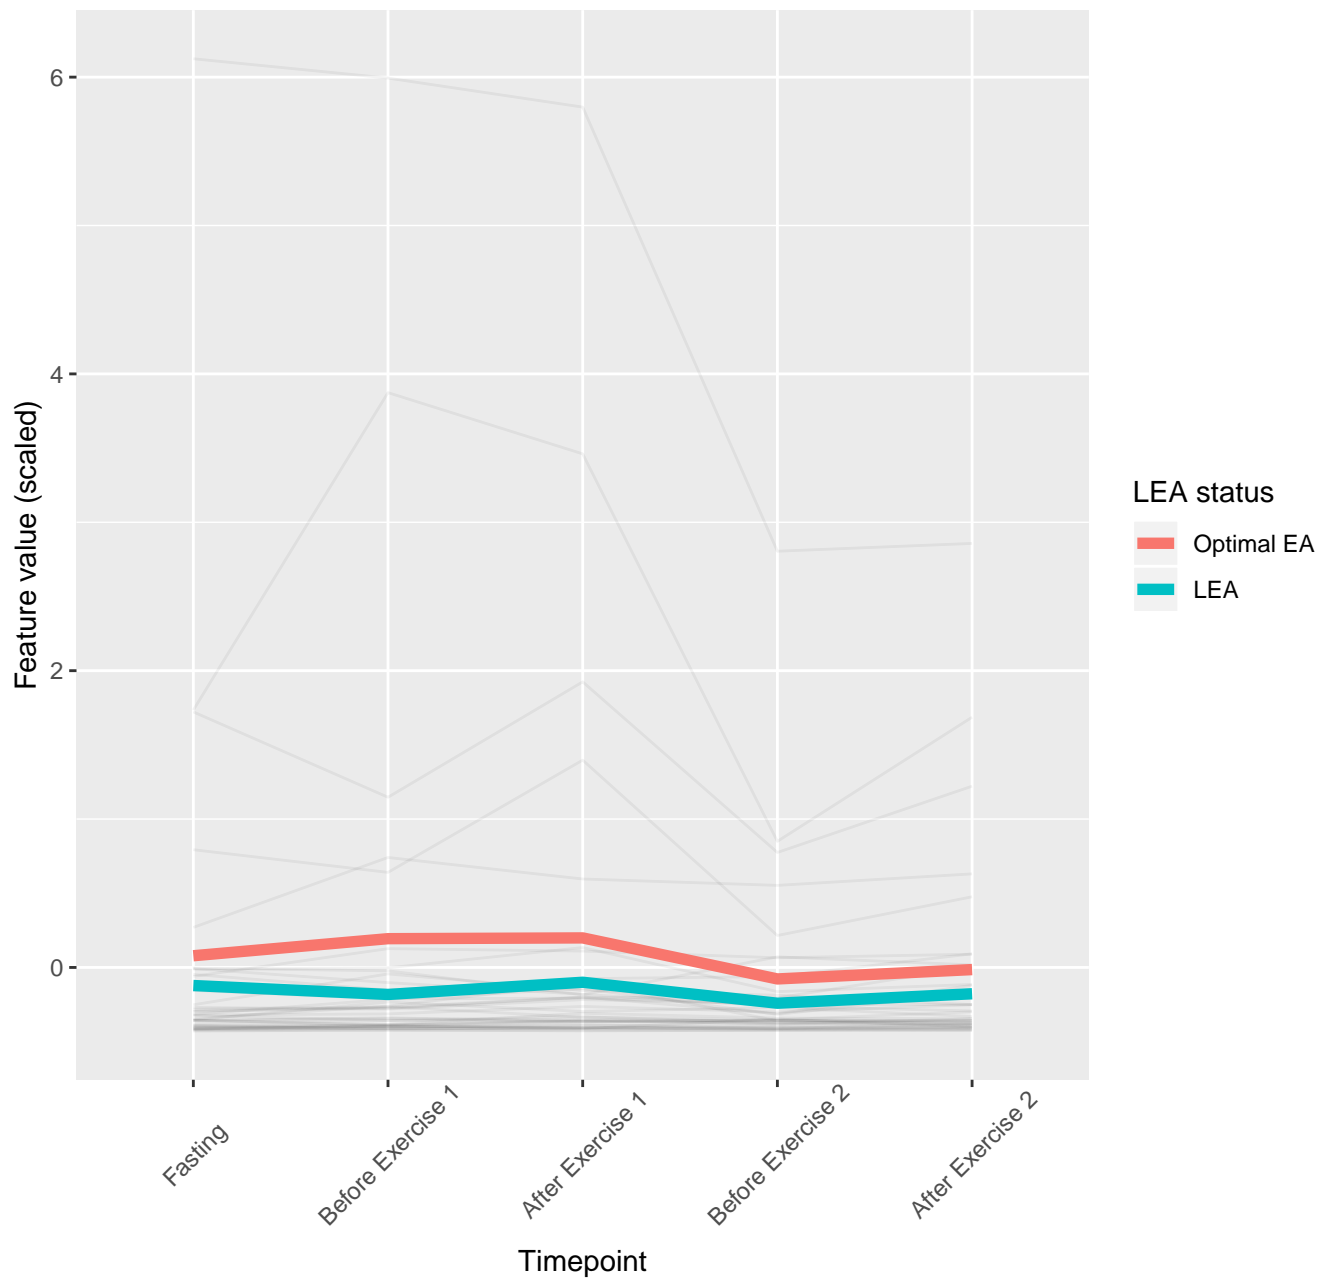



# GLYCEROPHOSPHOLIPIDS

Line plot of LPC(16:0e)

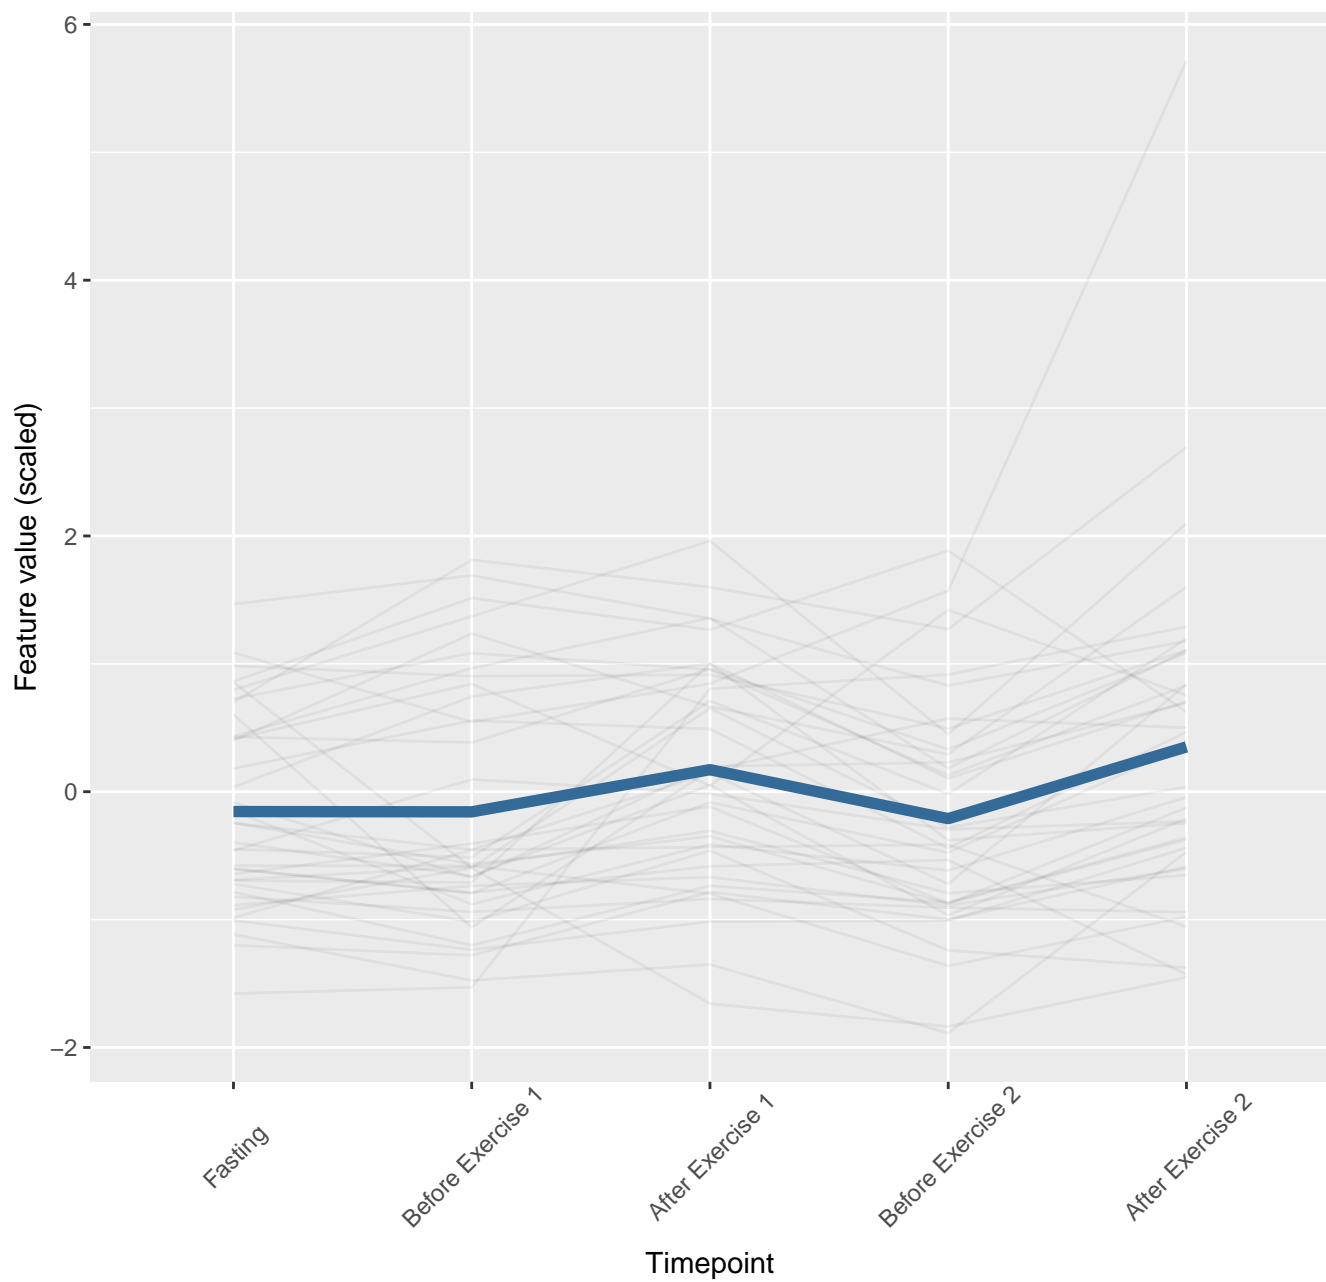

Line plot of LPC(16:0e)

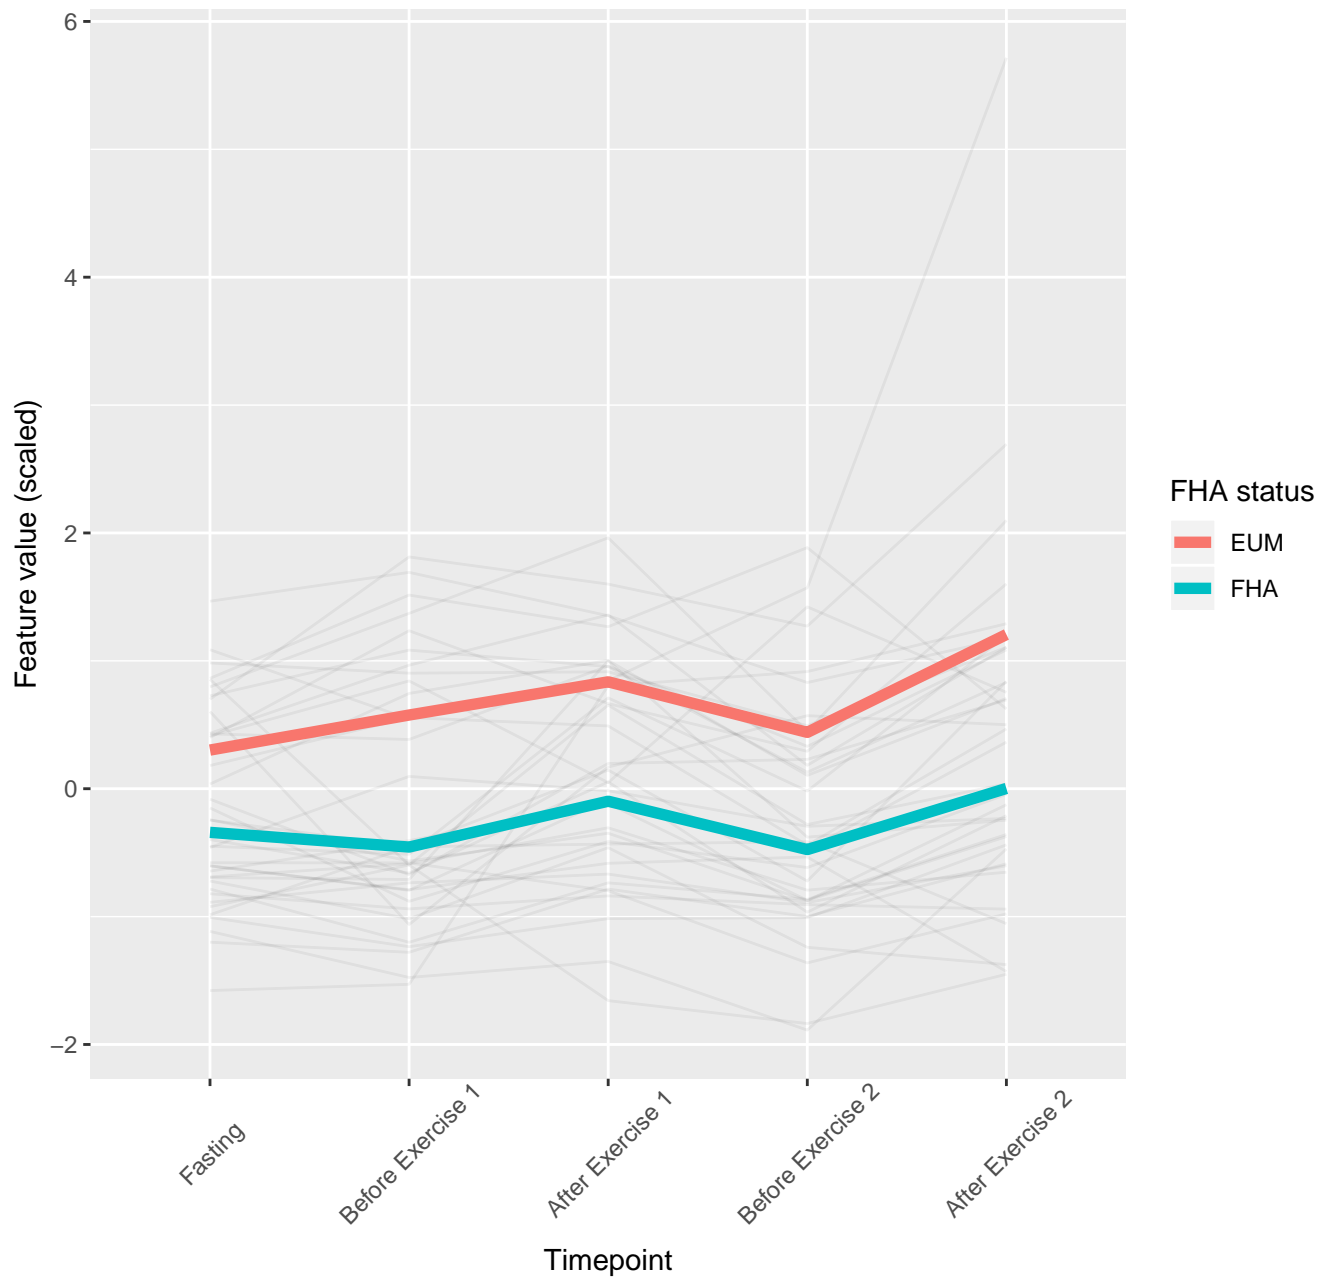

Line plot of LPC(16:0e)

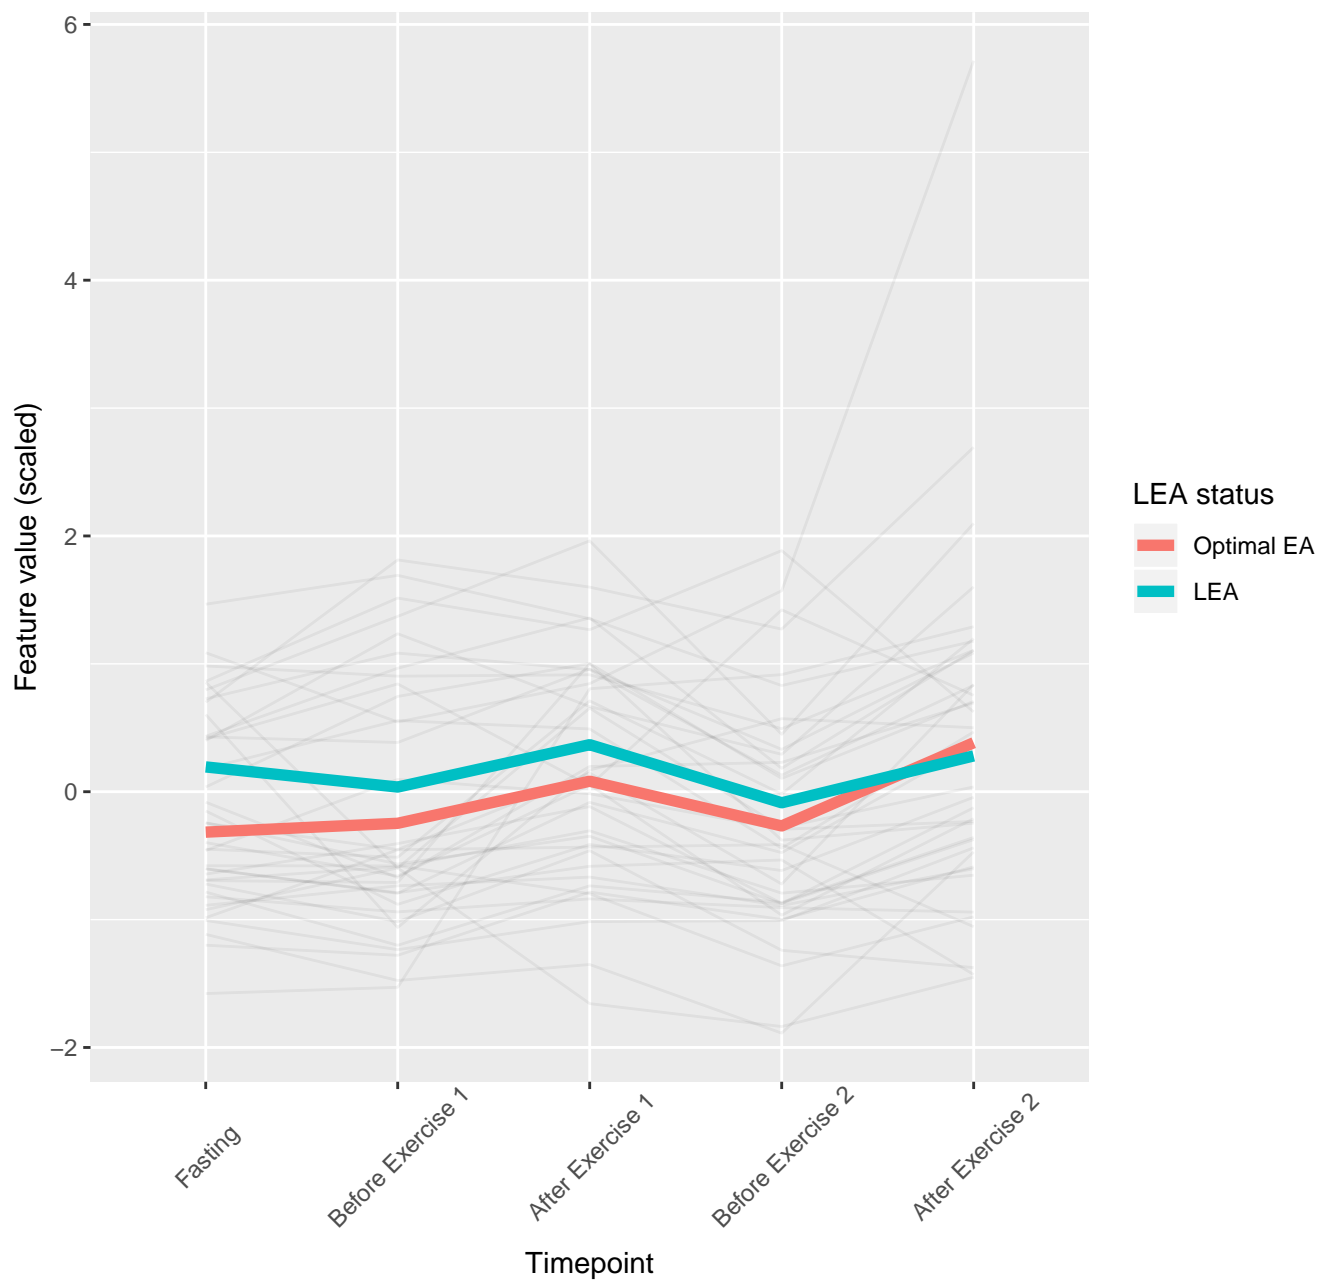

Line plot of LPC(16:0p)

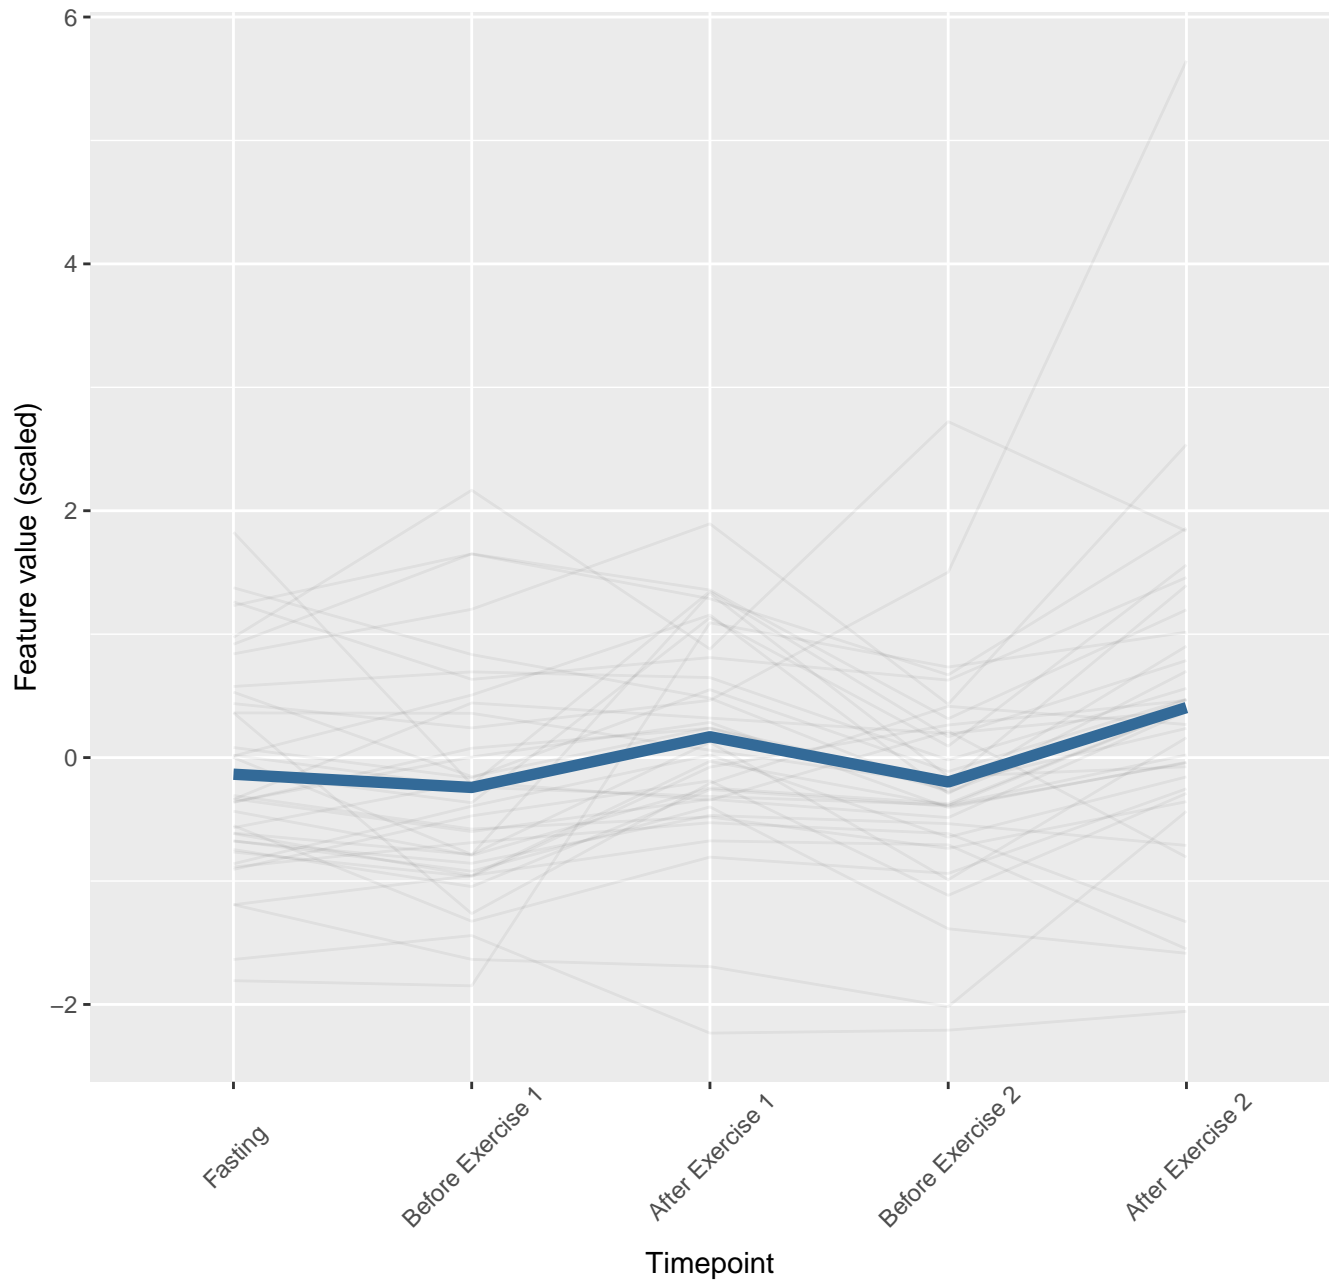

Line plot of LPC(16:0p)

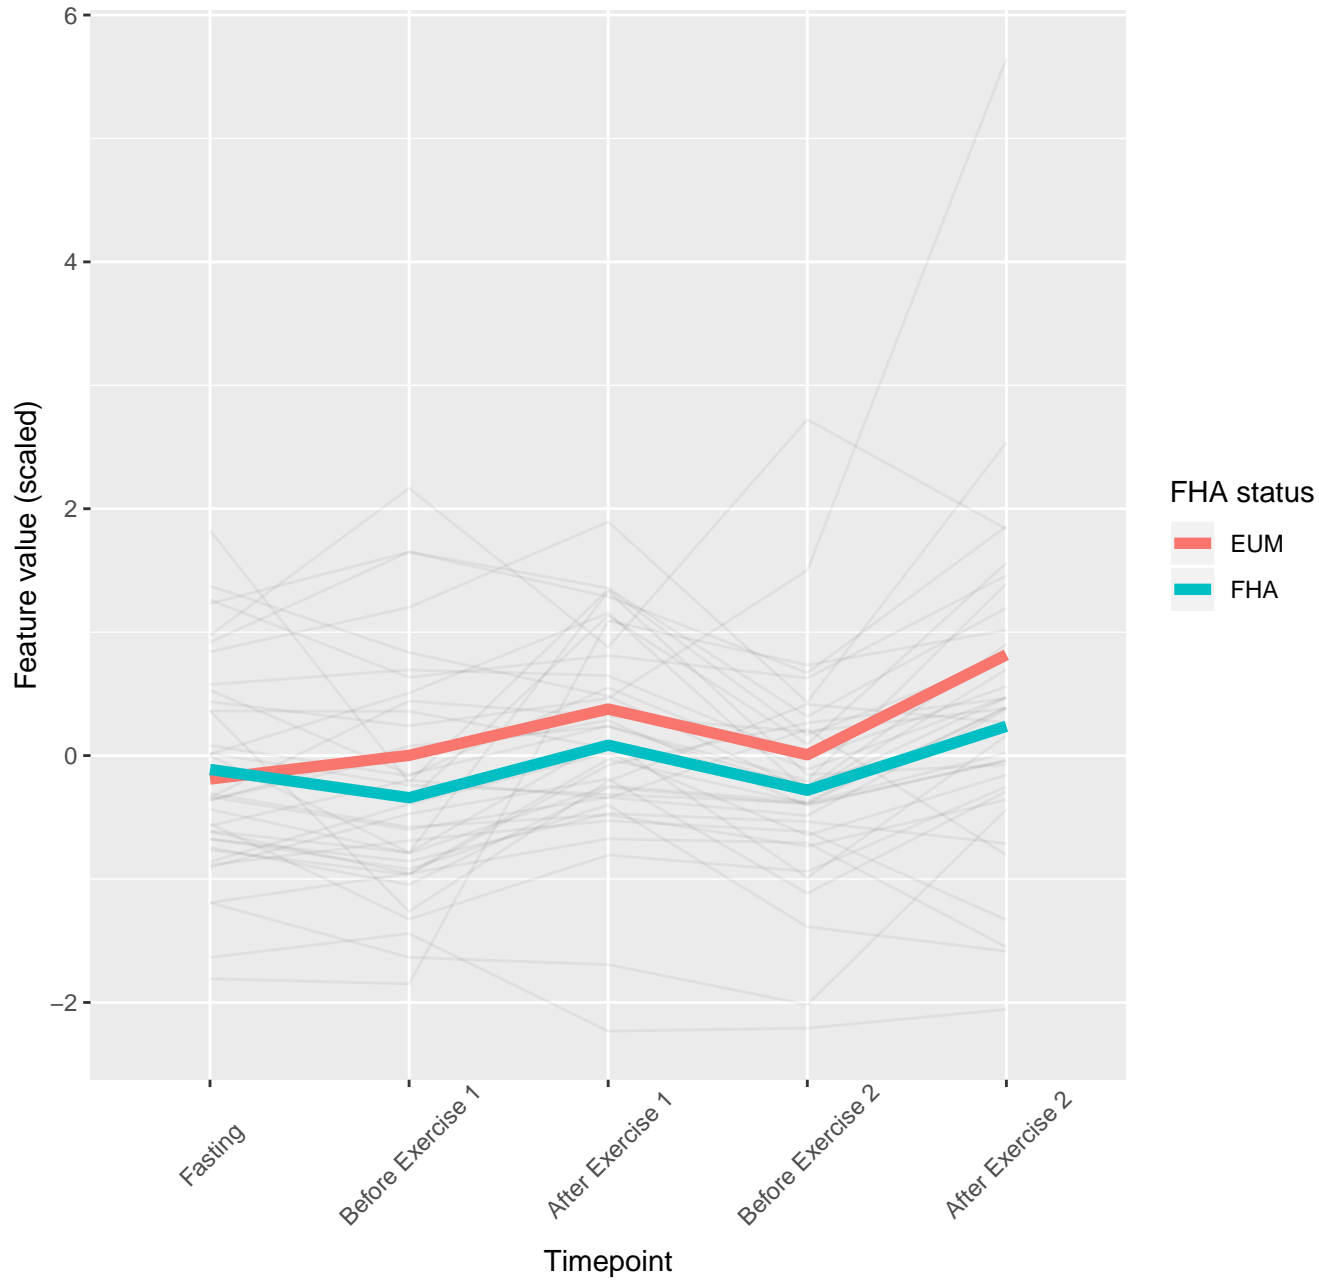

Line plot of LPC(16:0p)

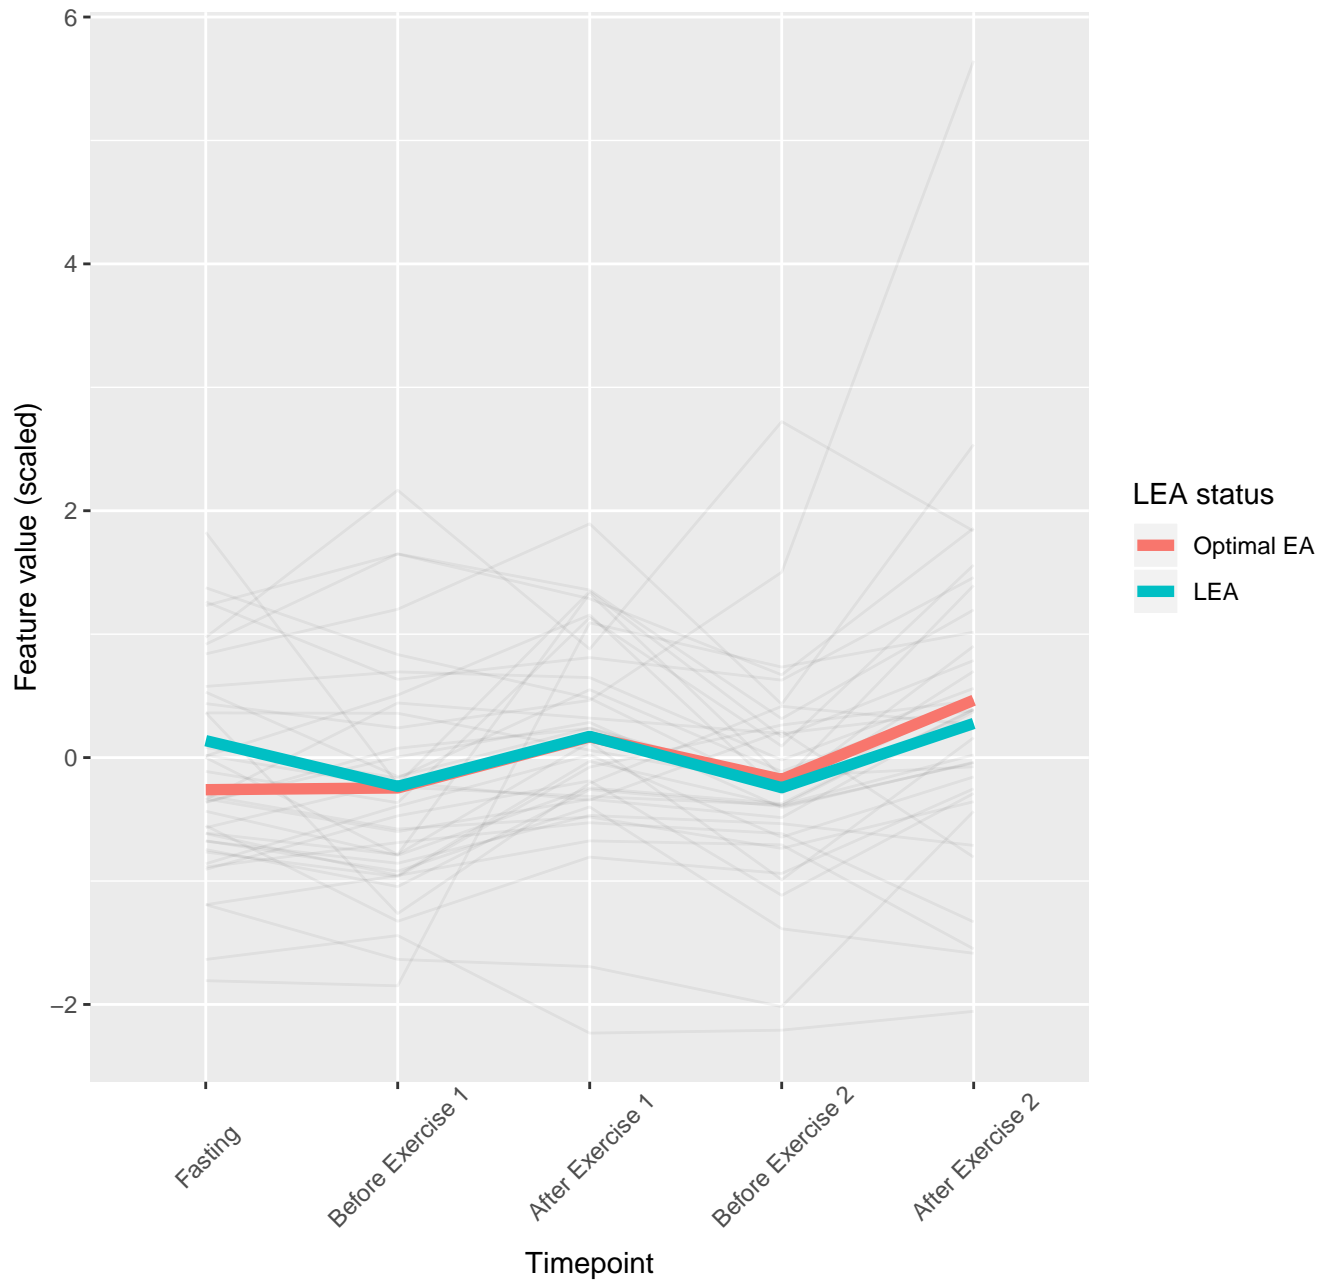

Line plot of LPC(16:1)

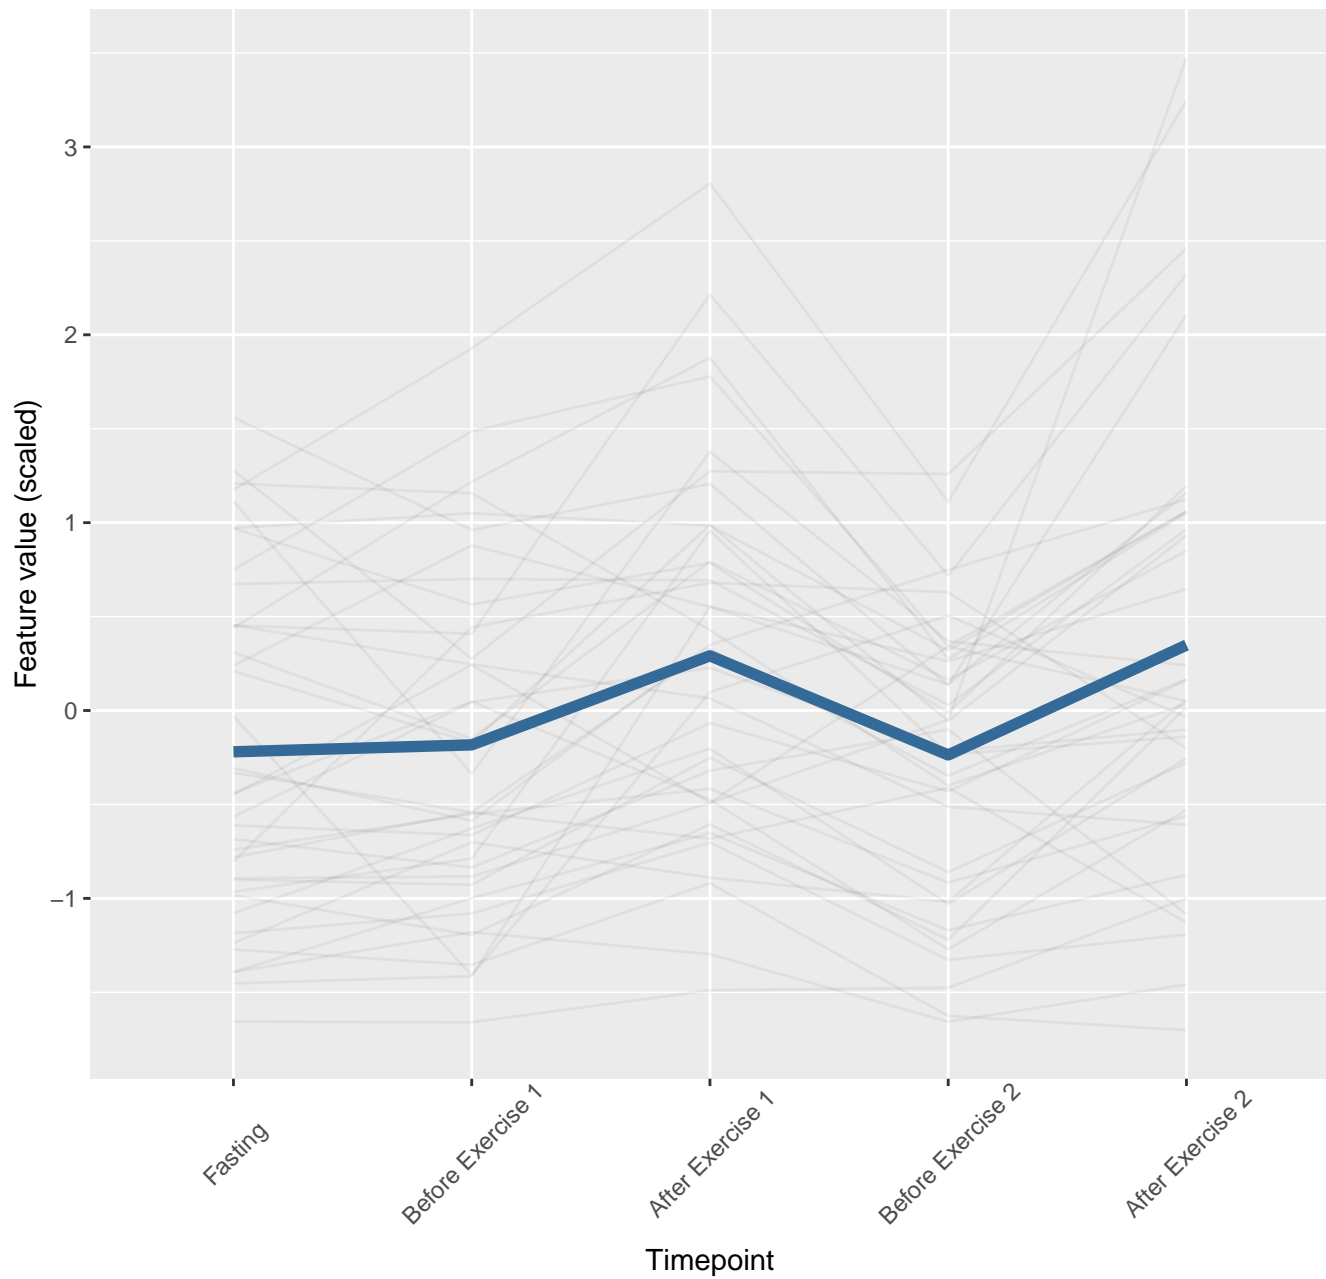



Line plot of LPC(16:1)

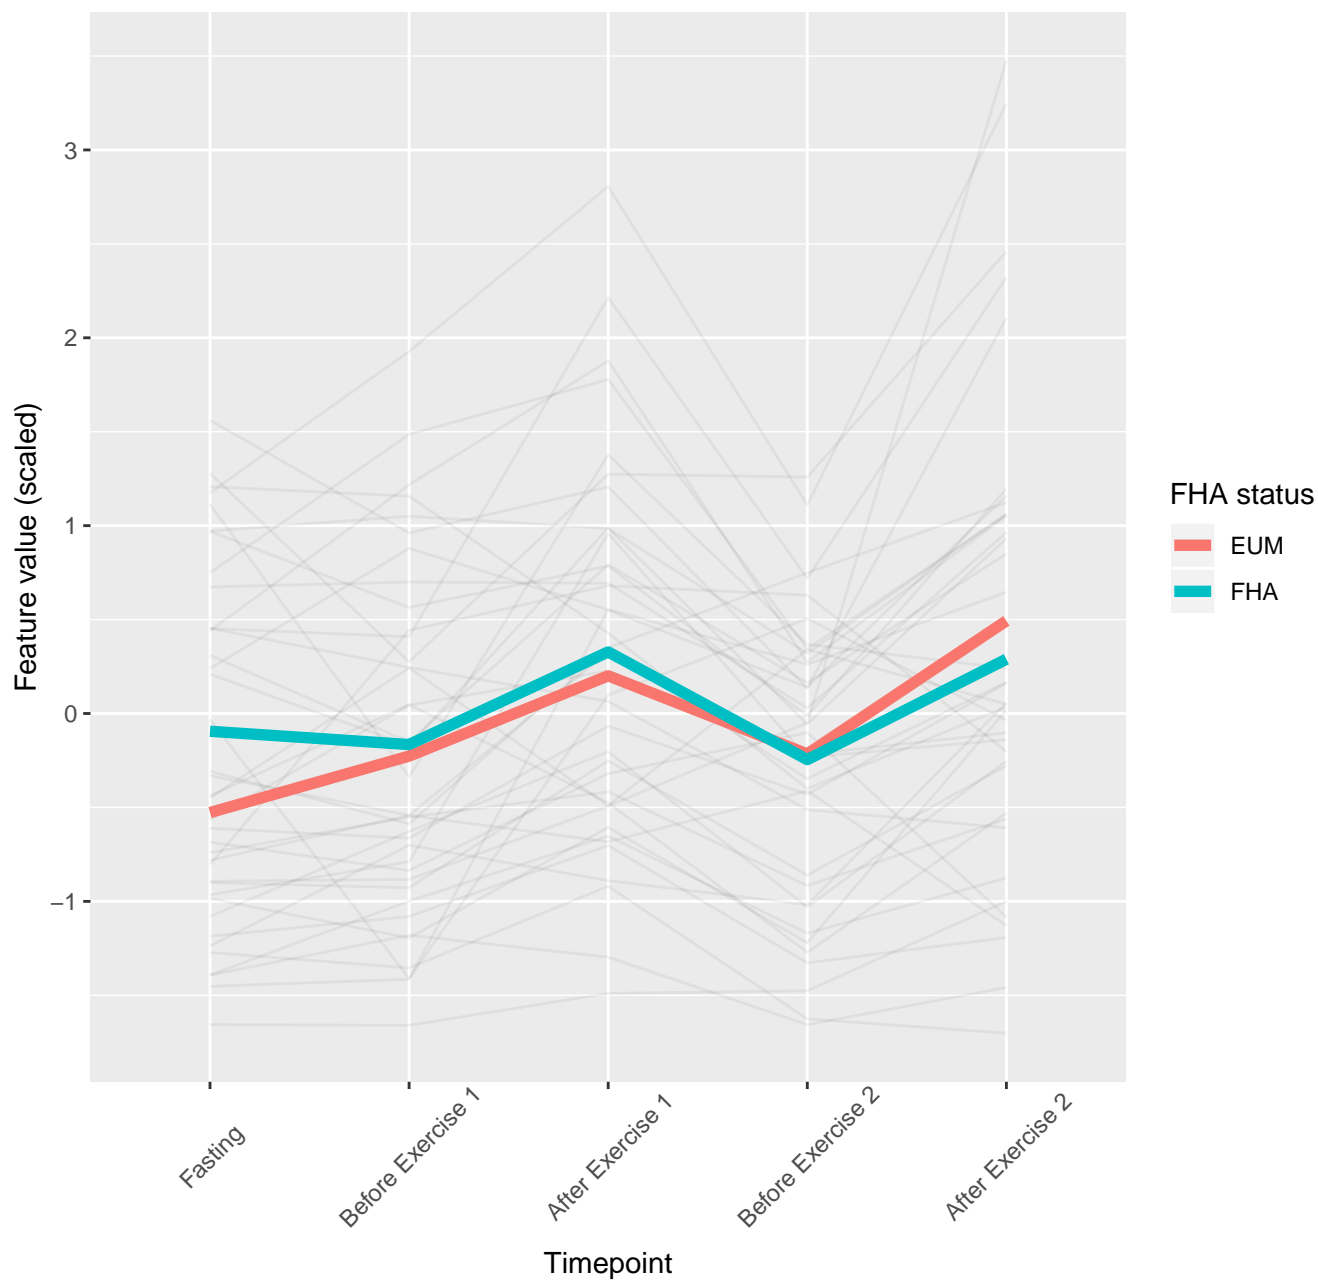

Line plot of LPC(16:1)

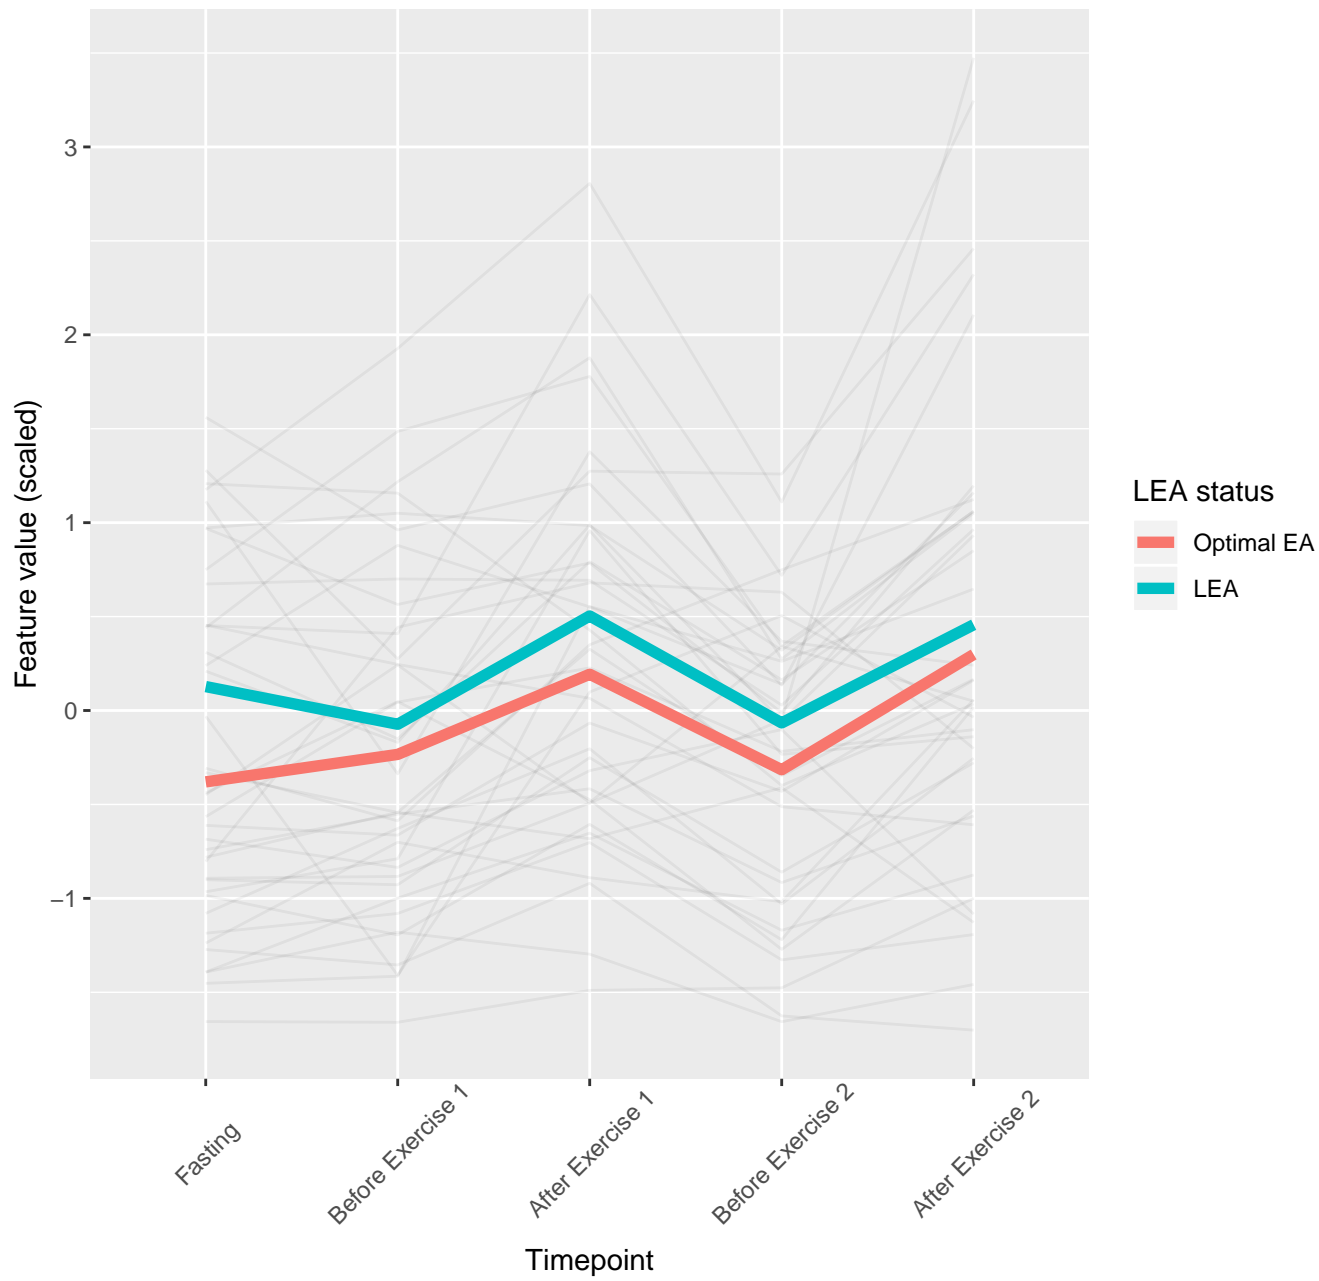

Line plot of LPC(18:1)

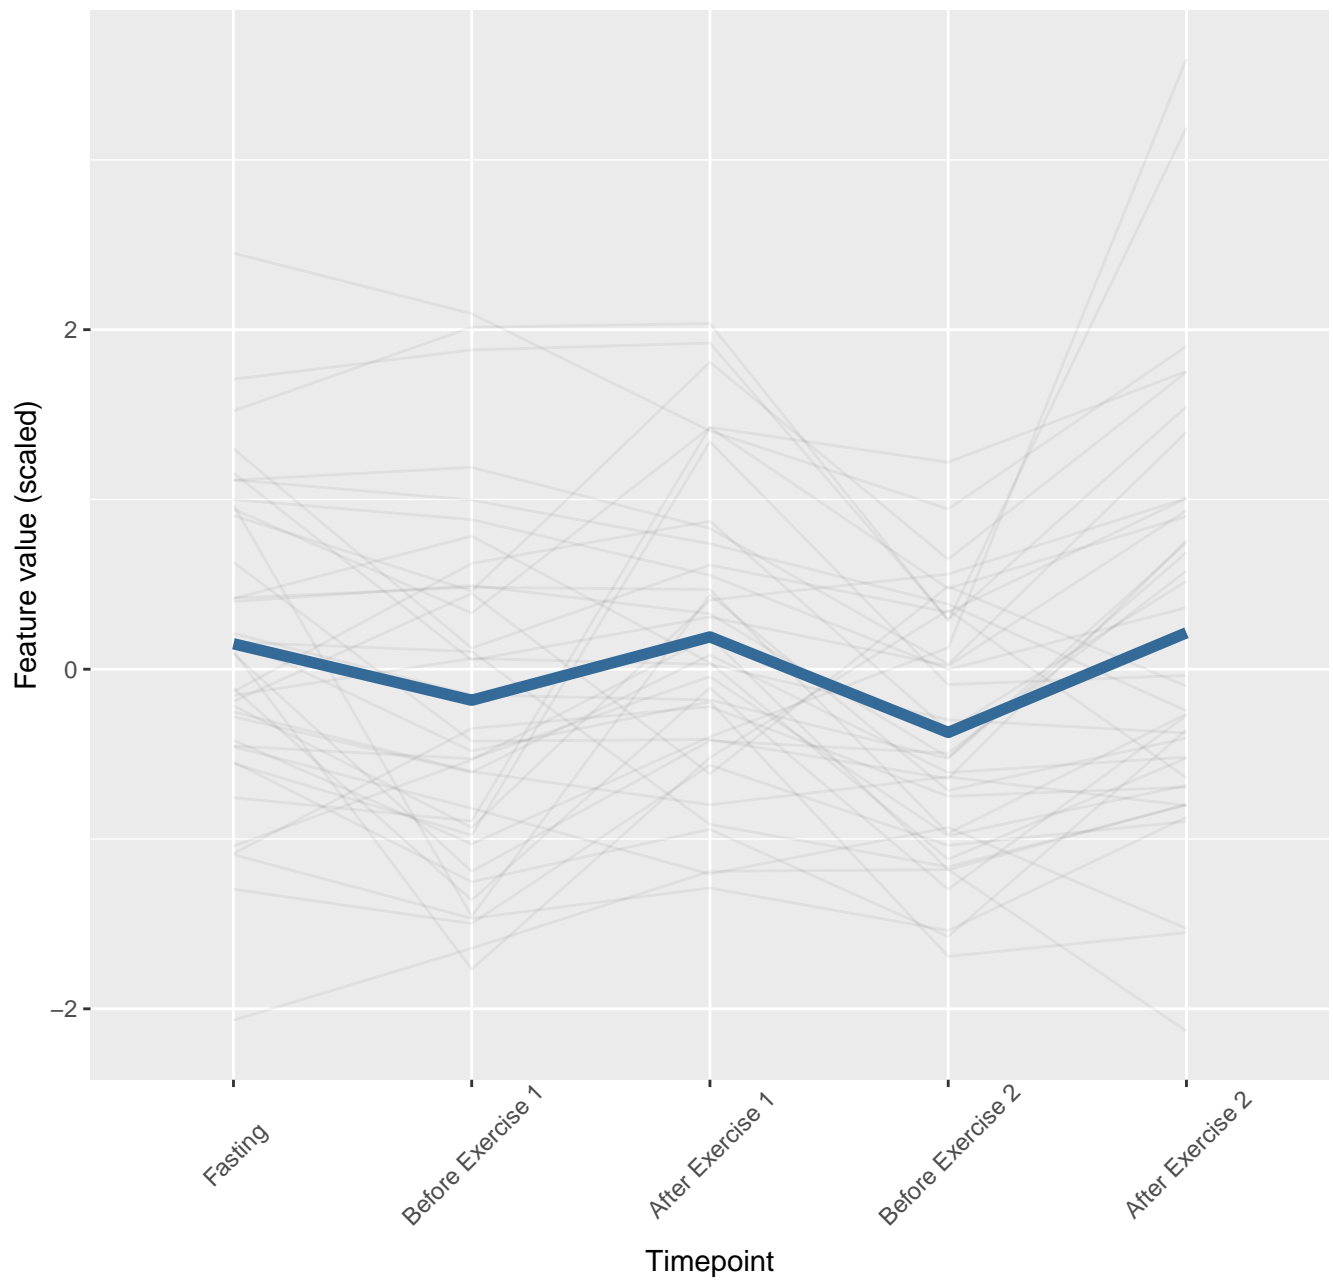

Line plot of LPC(18:1)

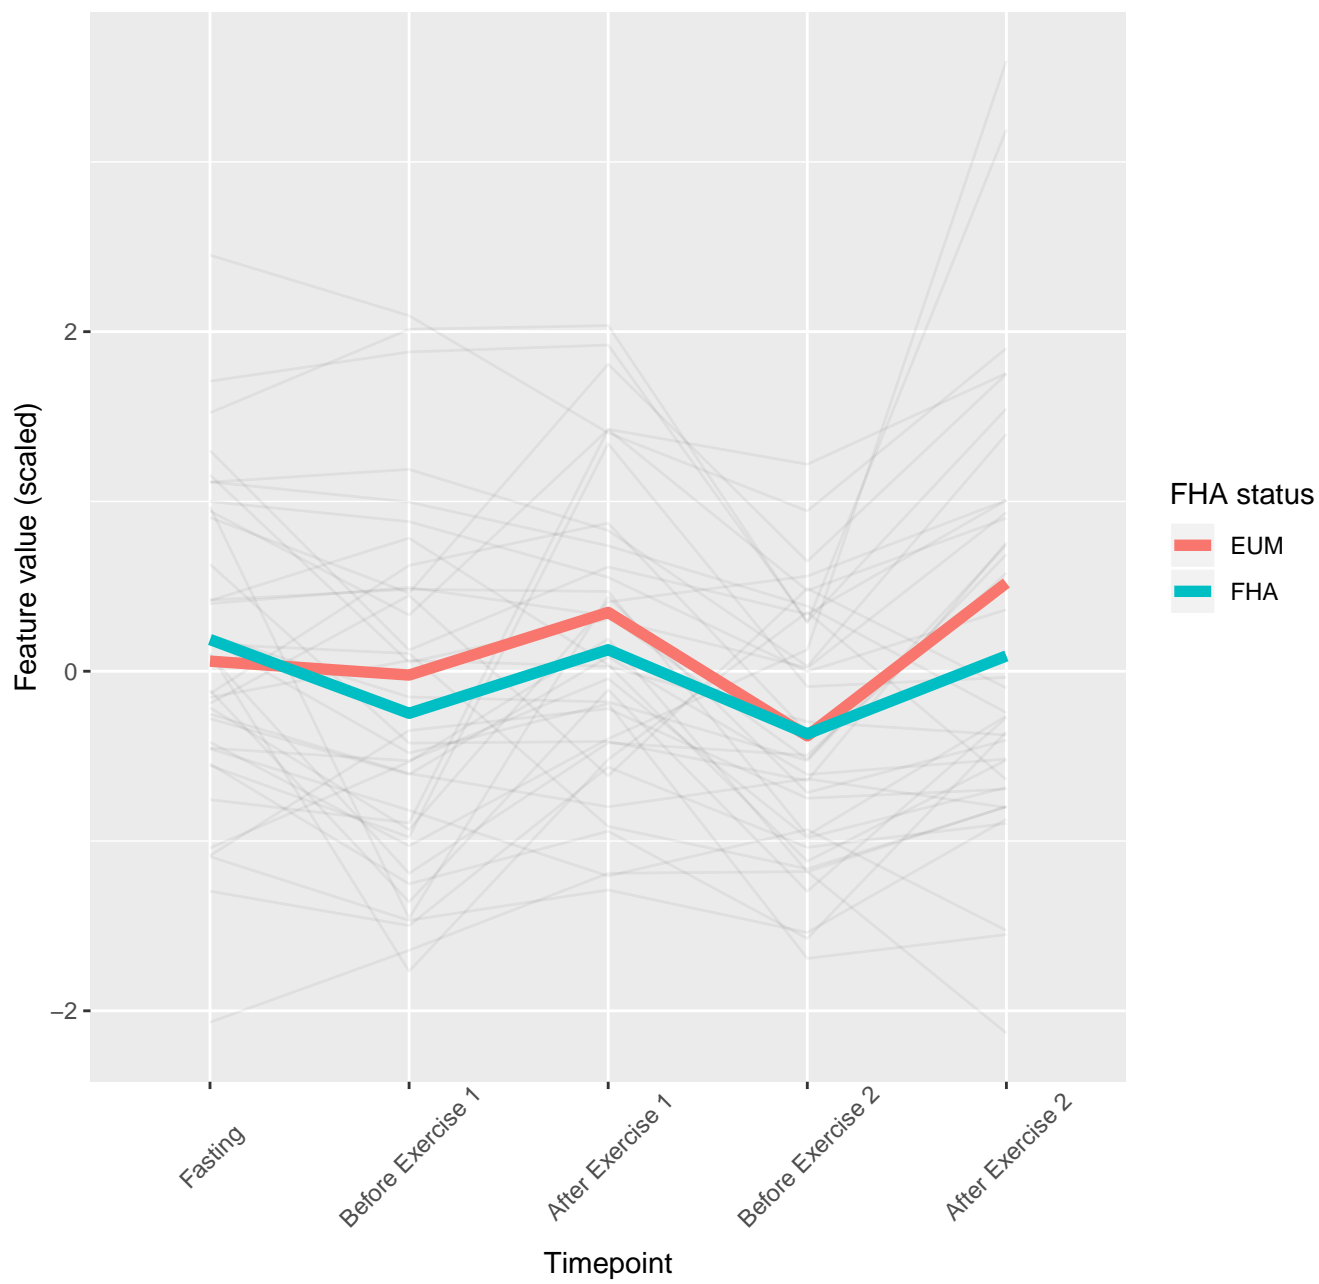

Line plot of LPC(18:1)

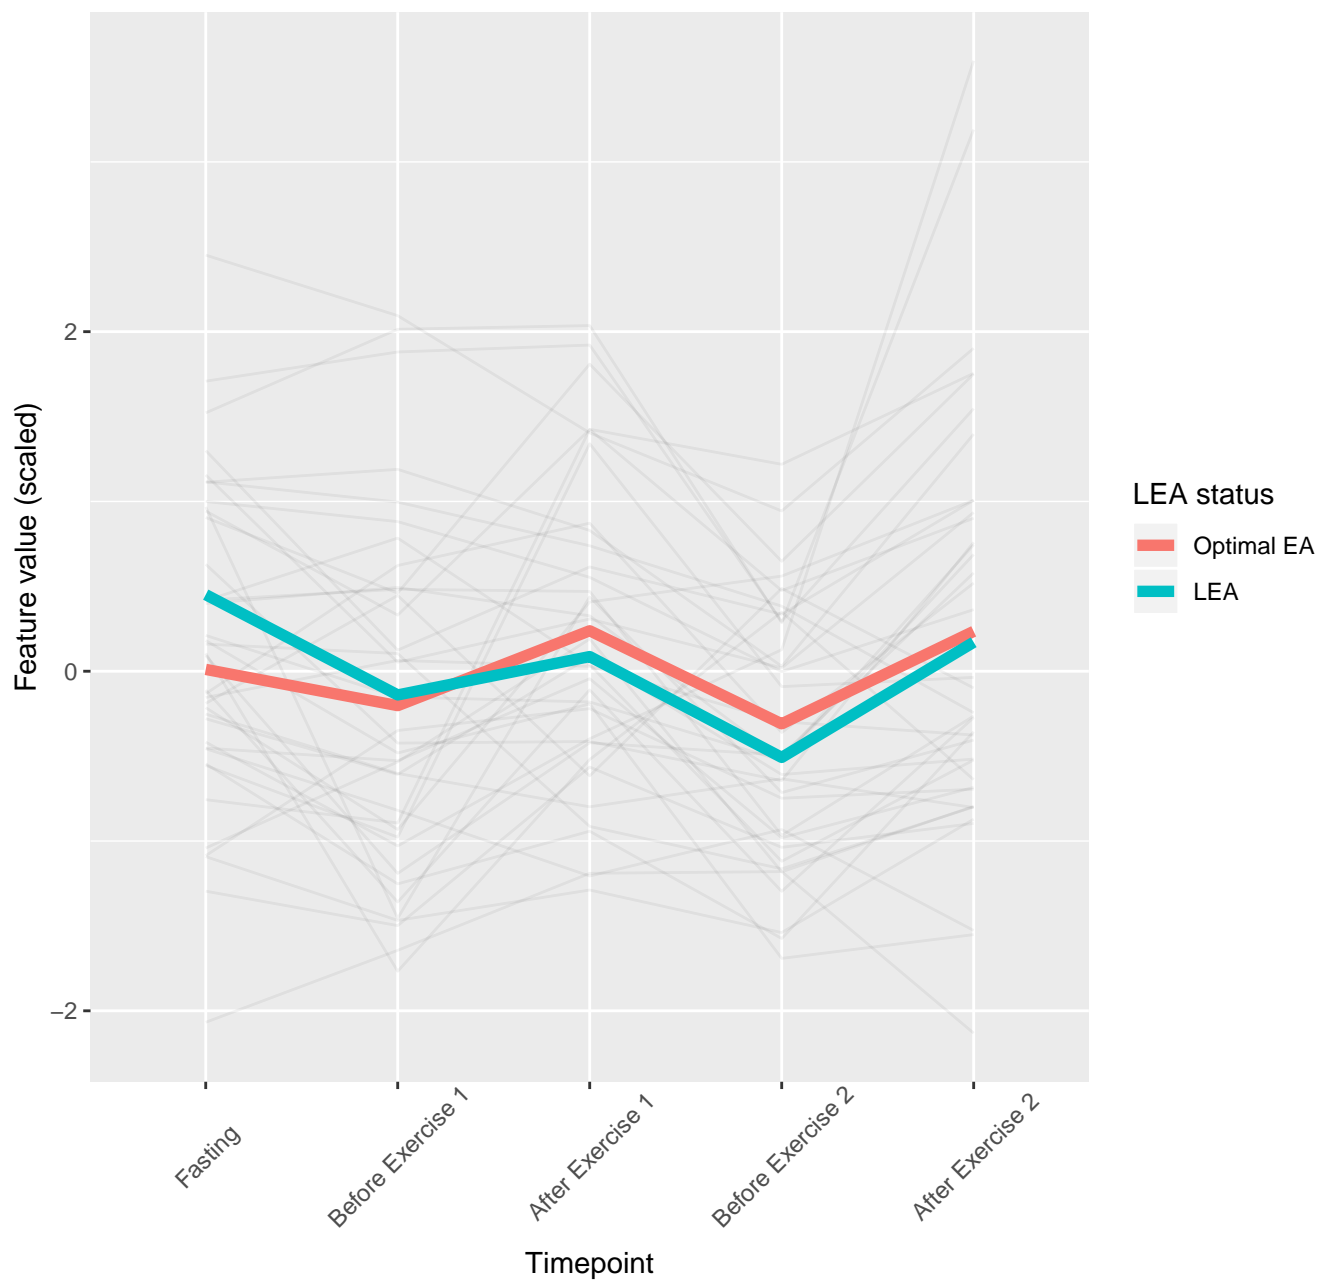

Line plot of LPC(18:2)

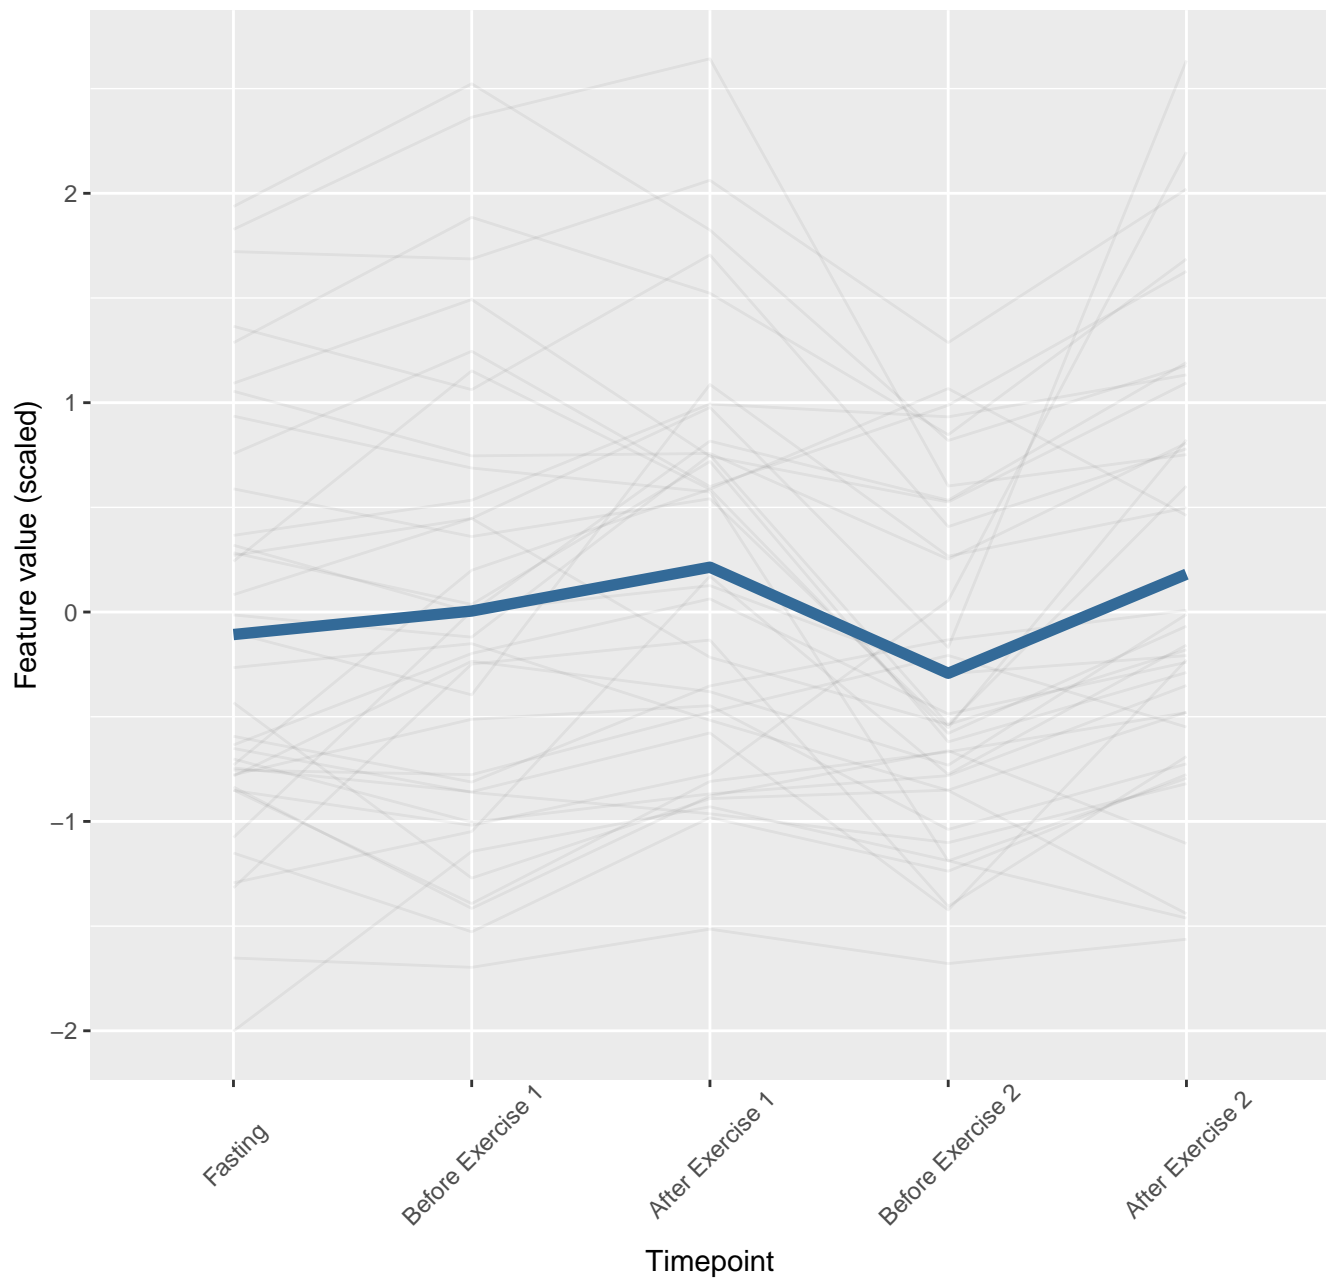

Line plot of LPC(18:2)

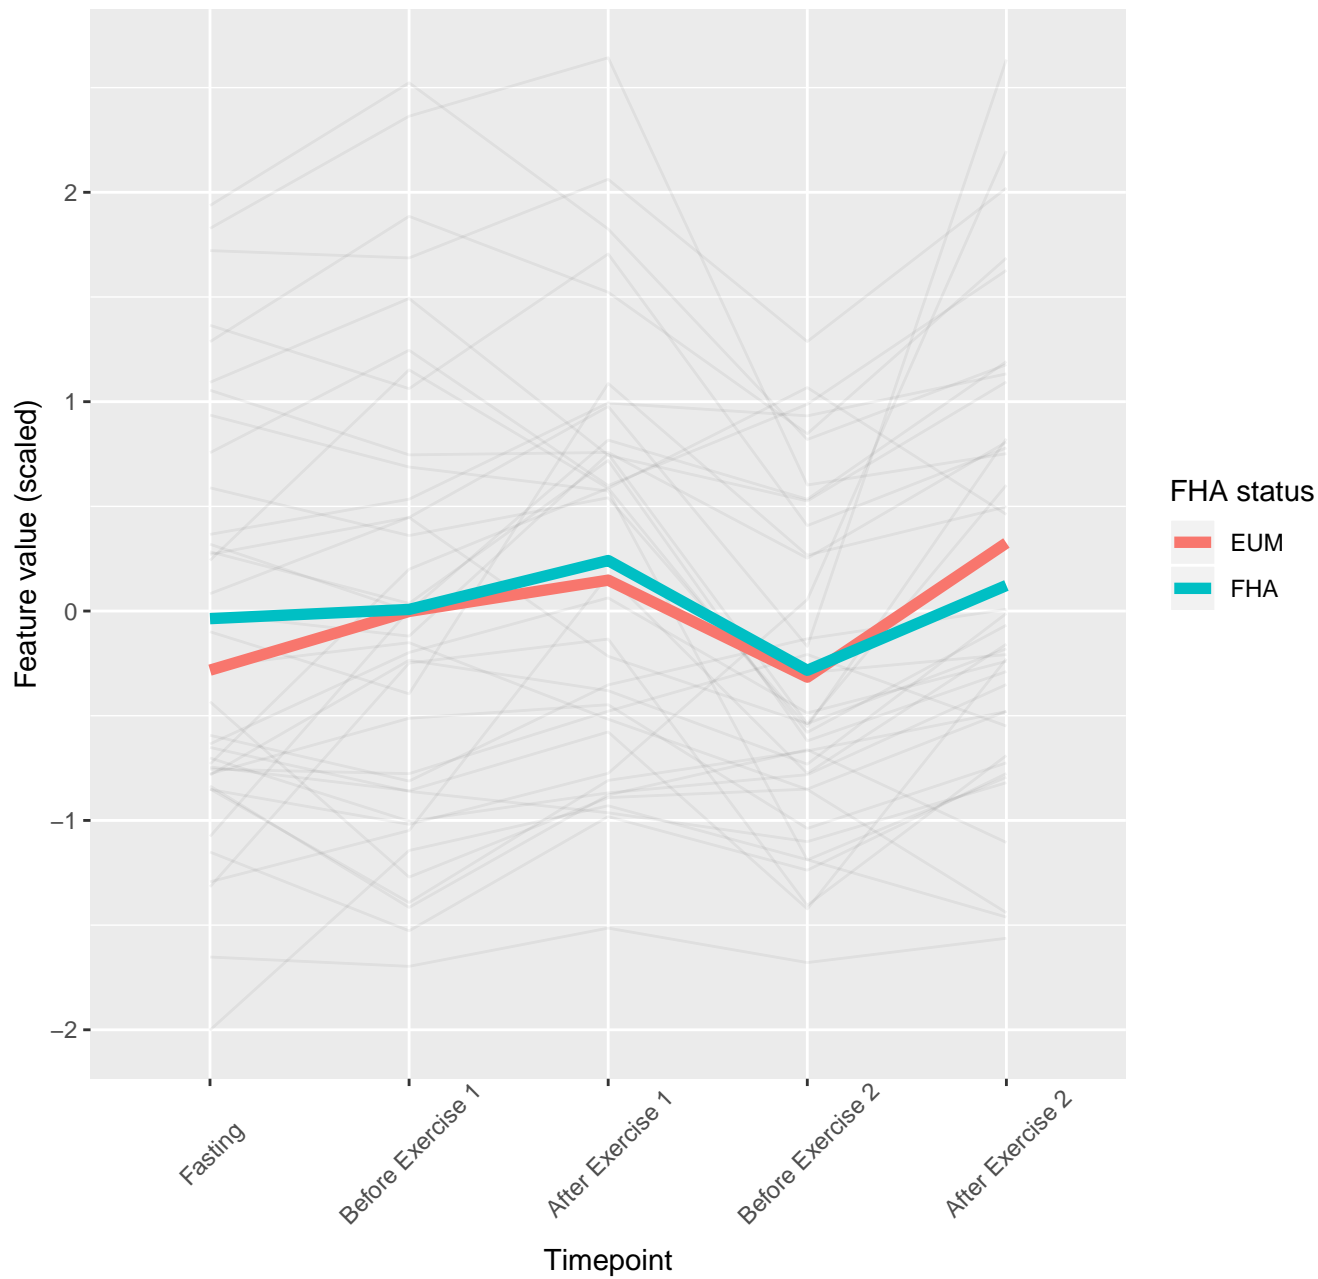

Line plot of LPC(18:2)

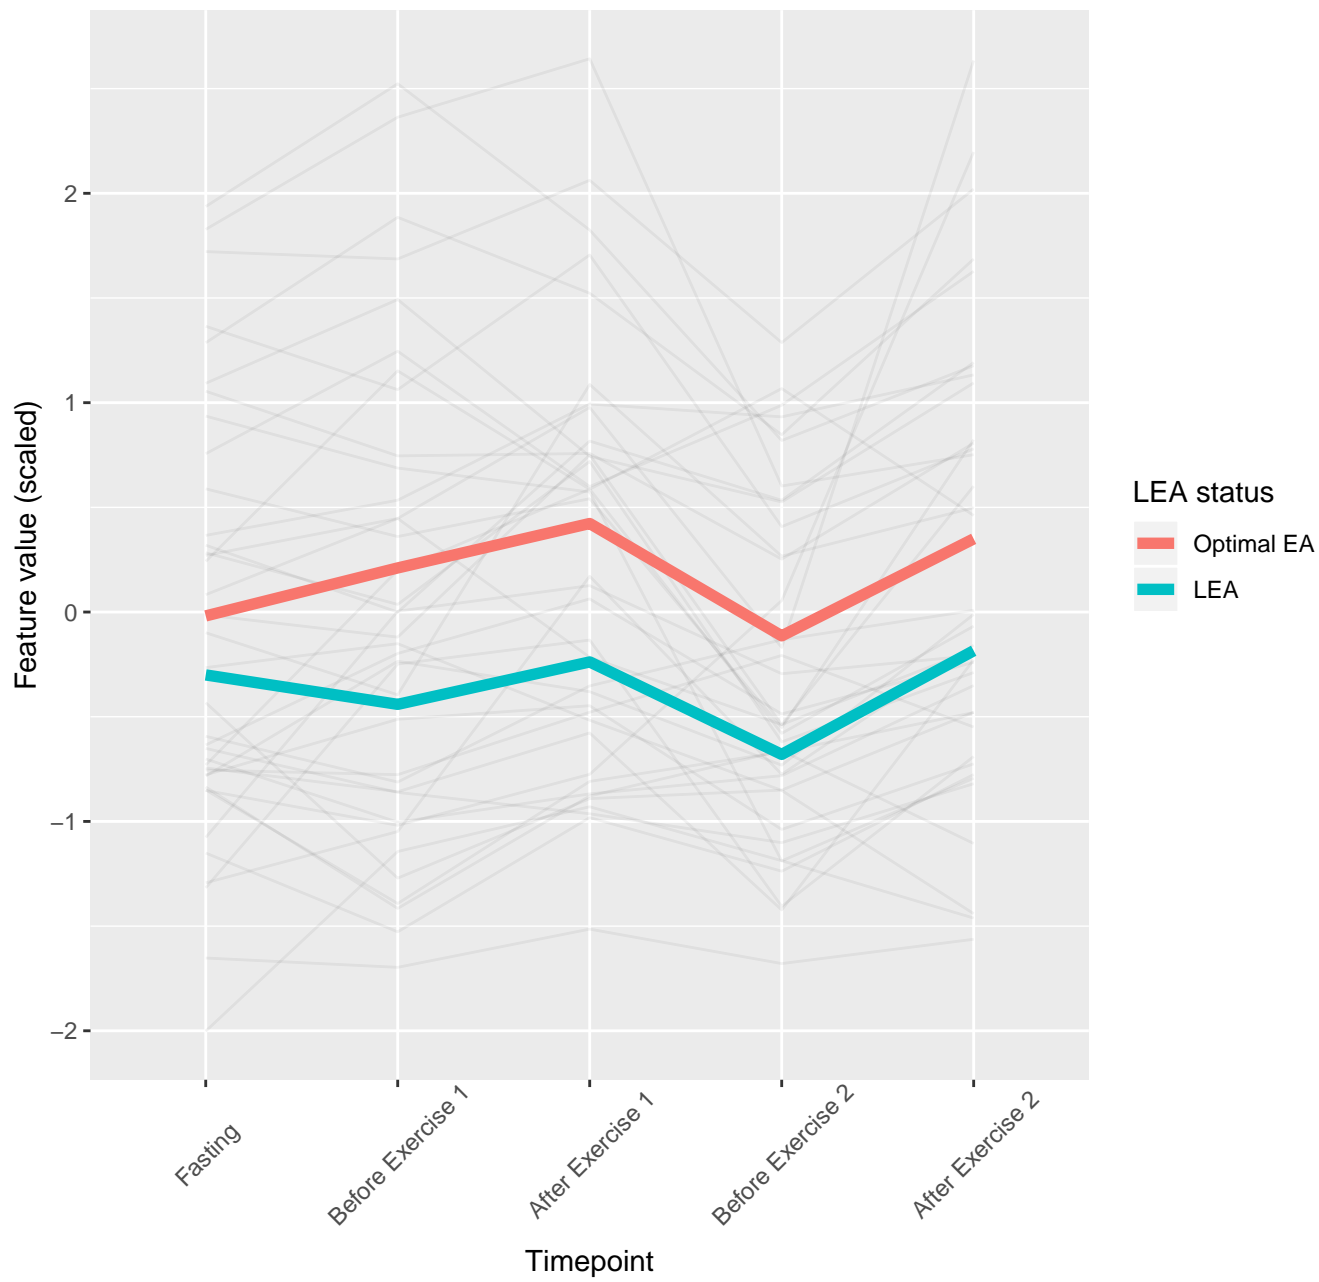



Line plot of LPC(20:3)

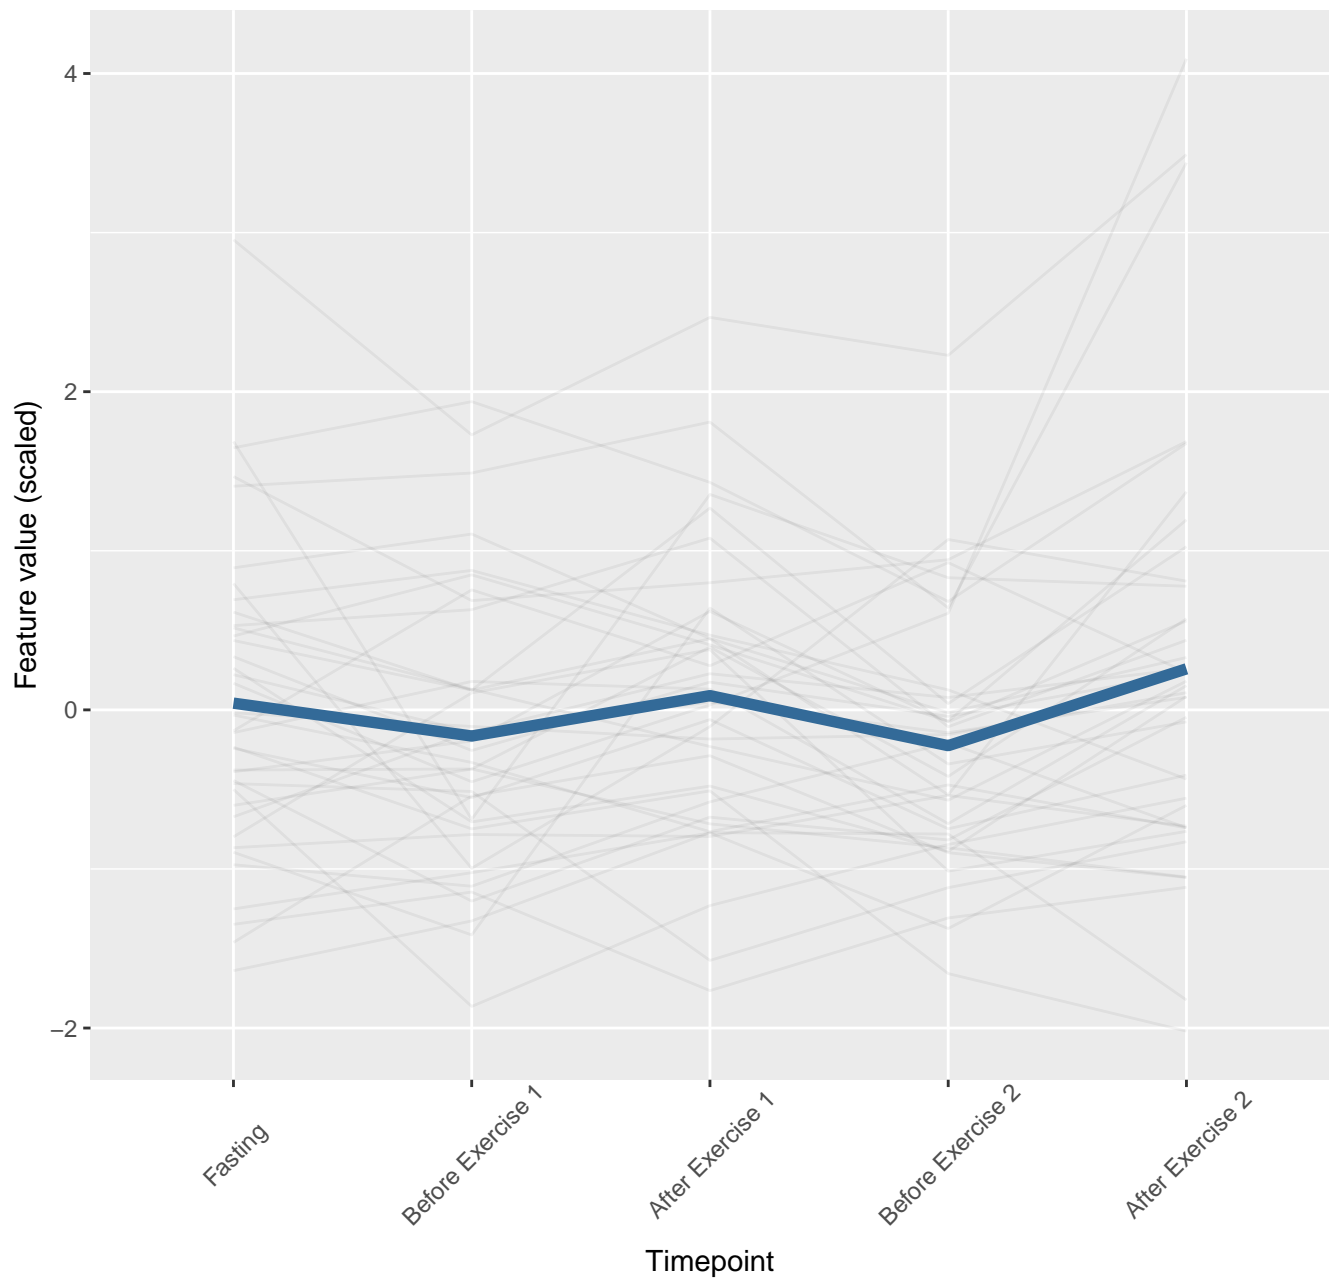

Line plot of LPC(20:3)

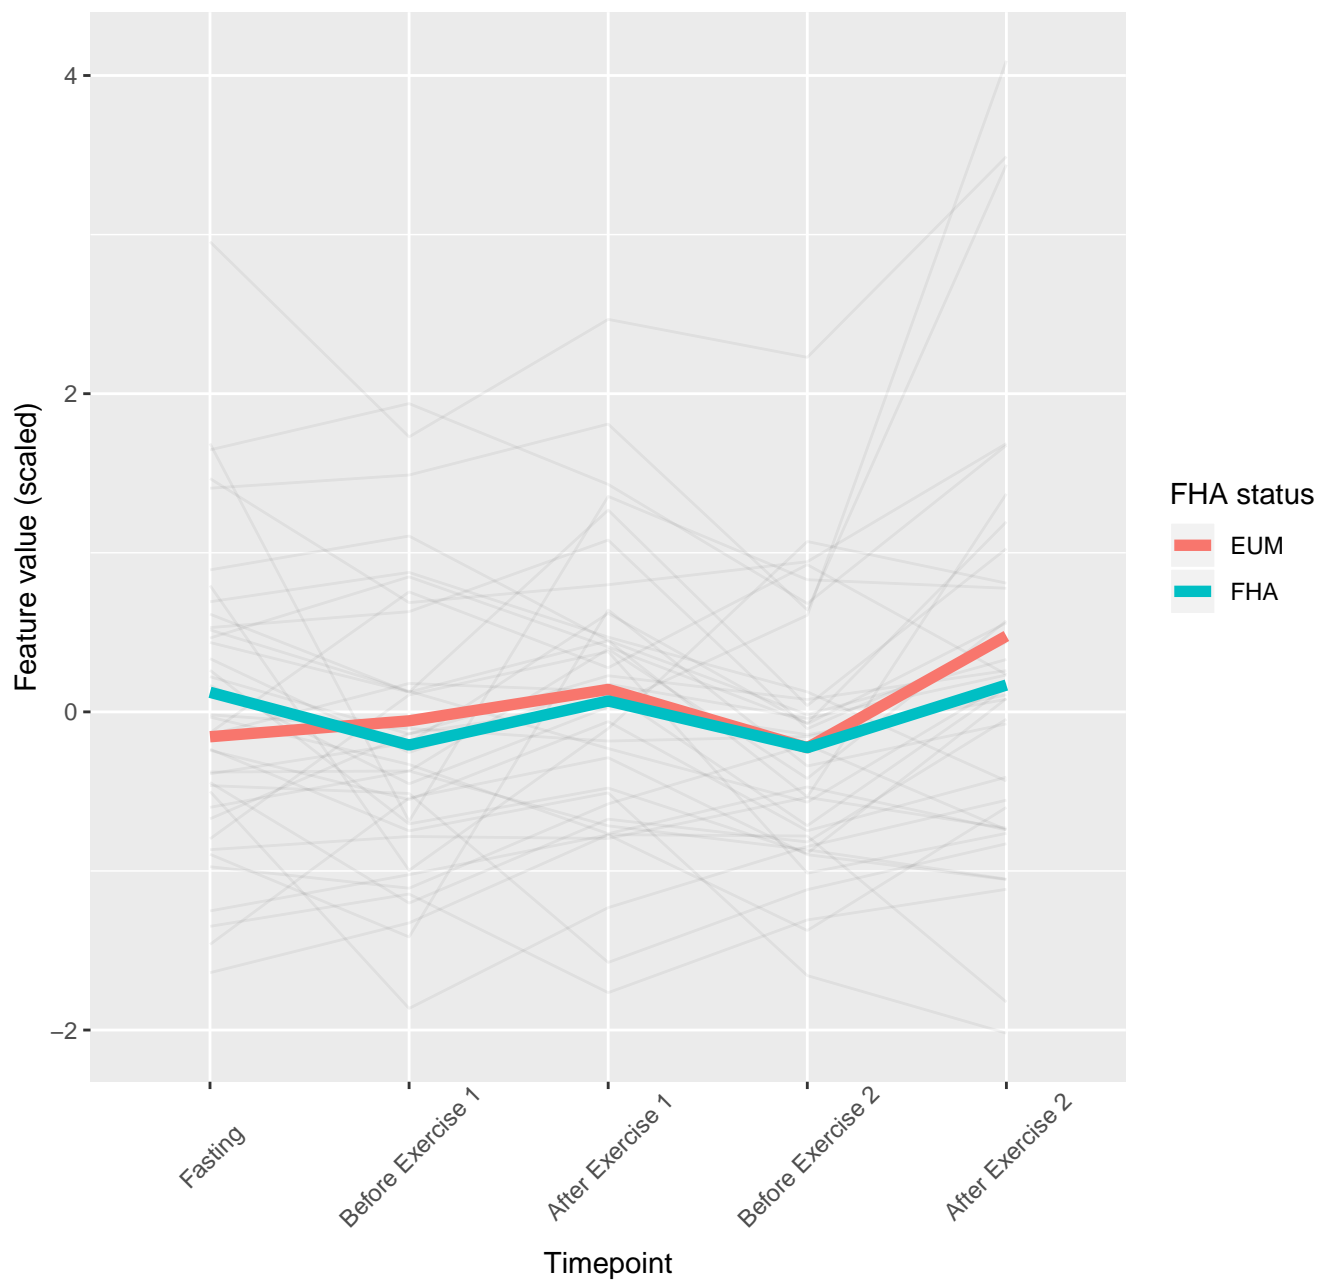

Line plot of LPC(20:3)

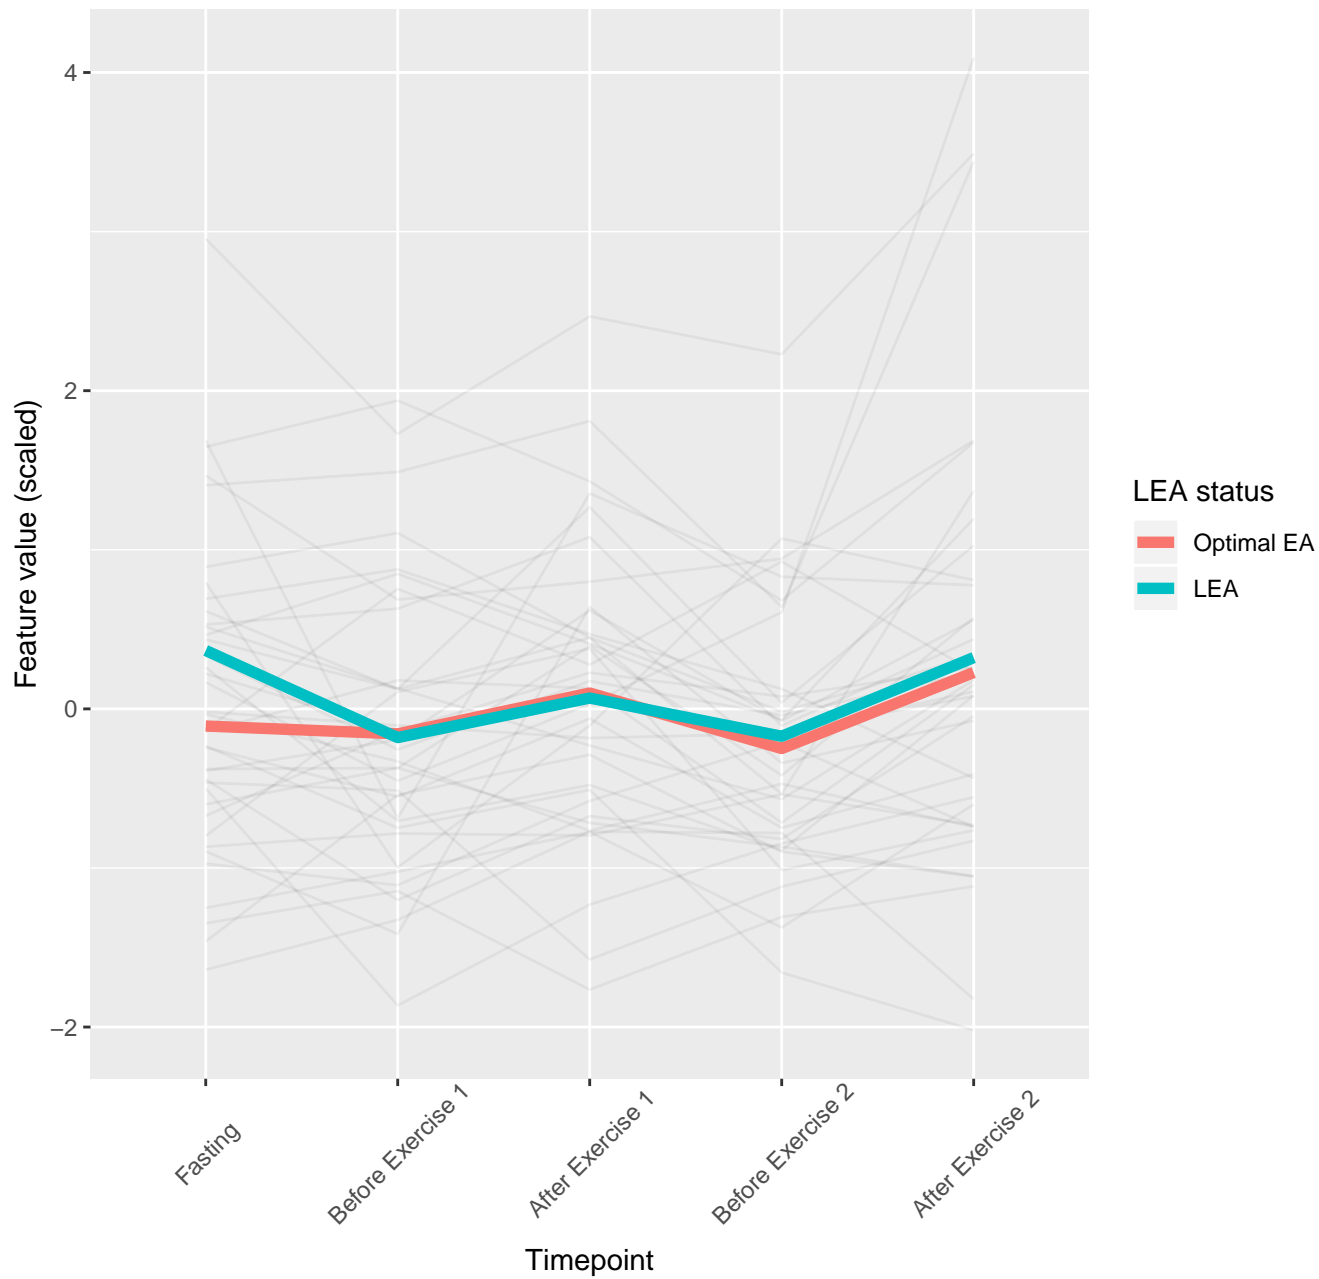

Line plot of LPC(20:4)

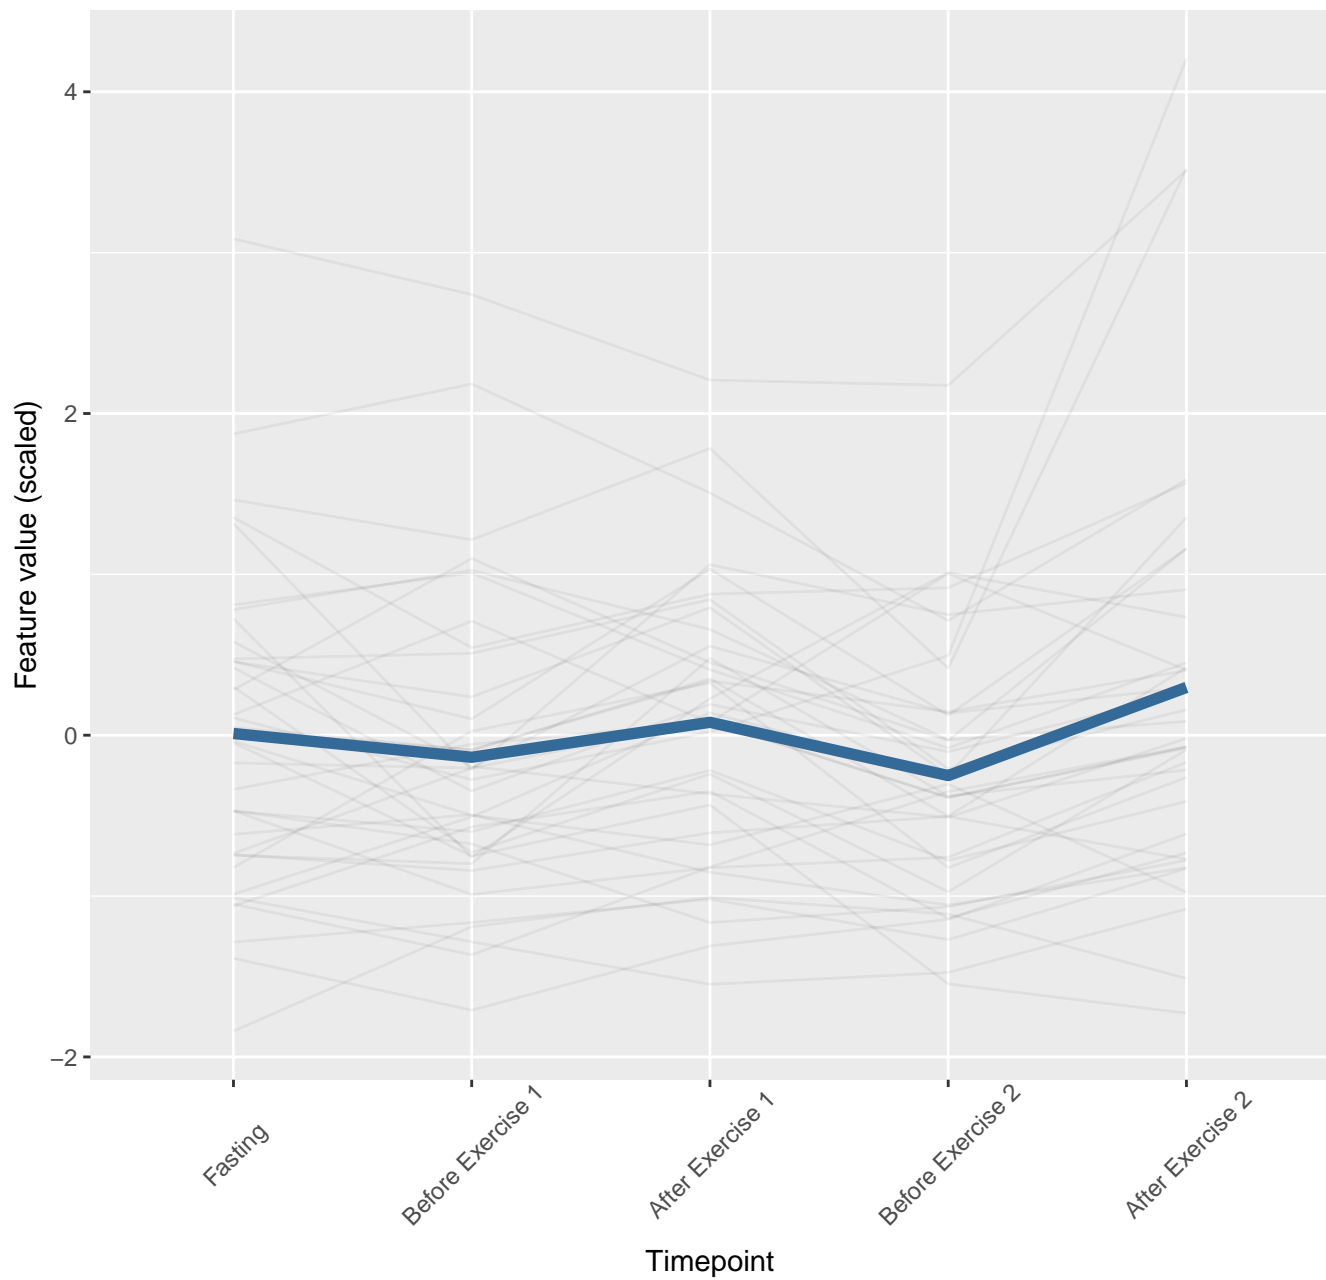

Line plot of LPC(20:4)

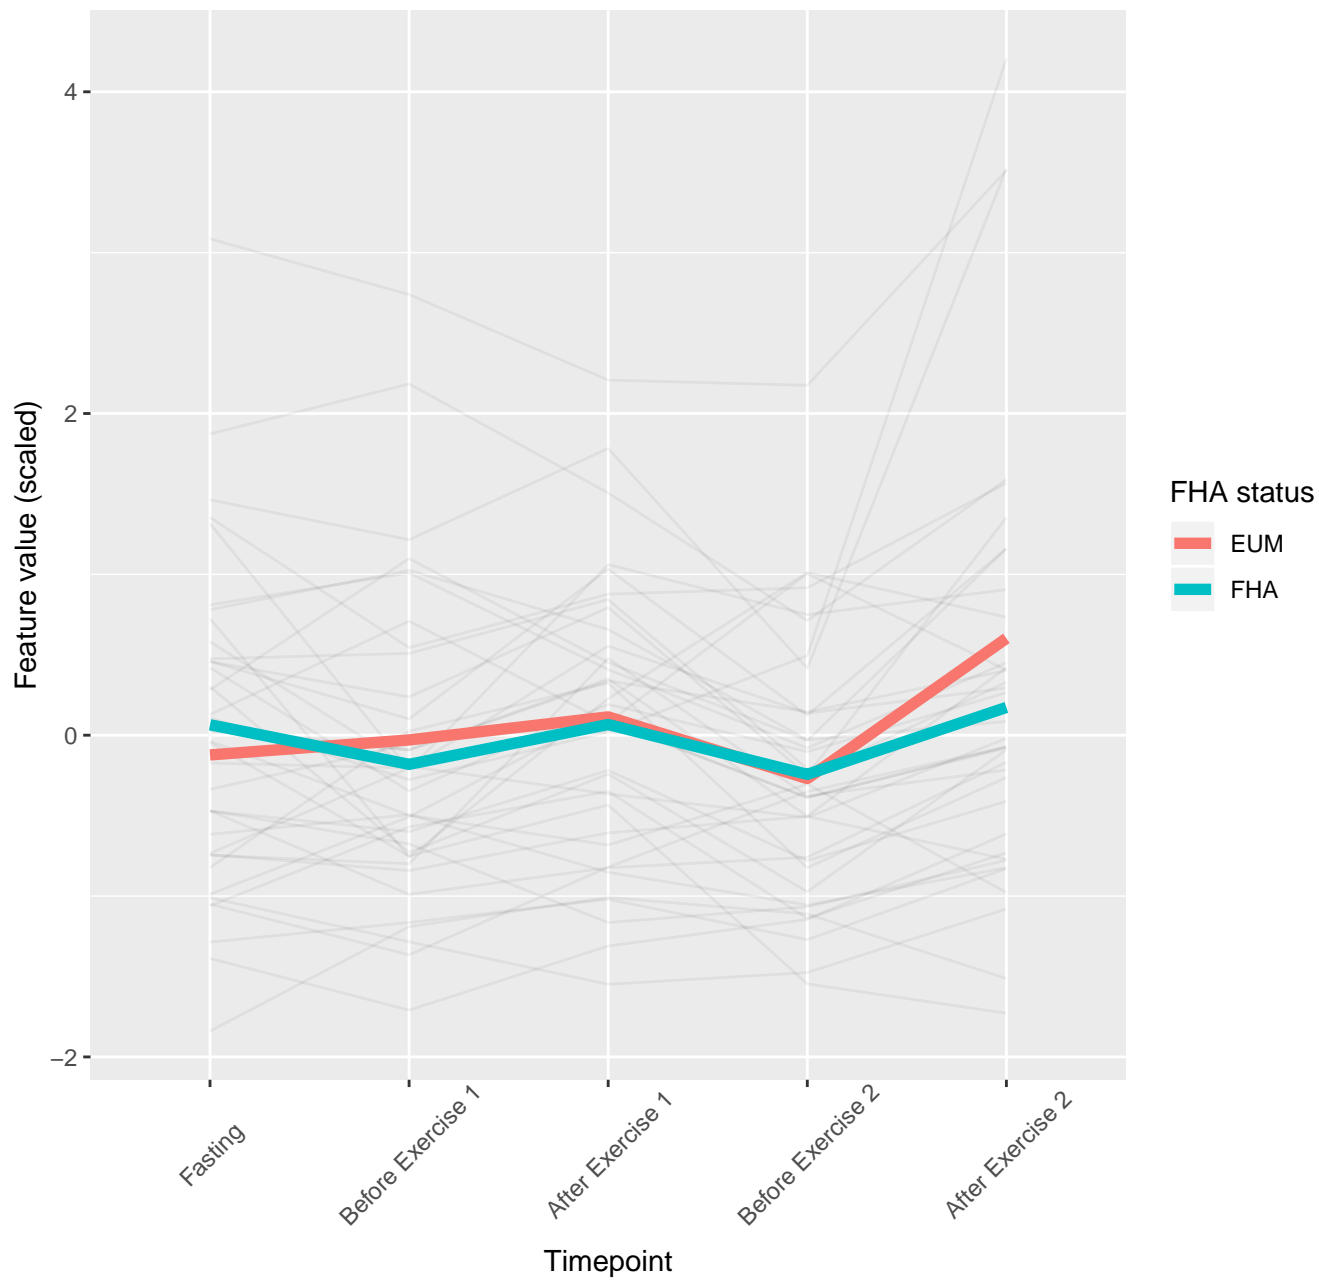

Line plot of LPC(20:4)

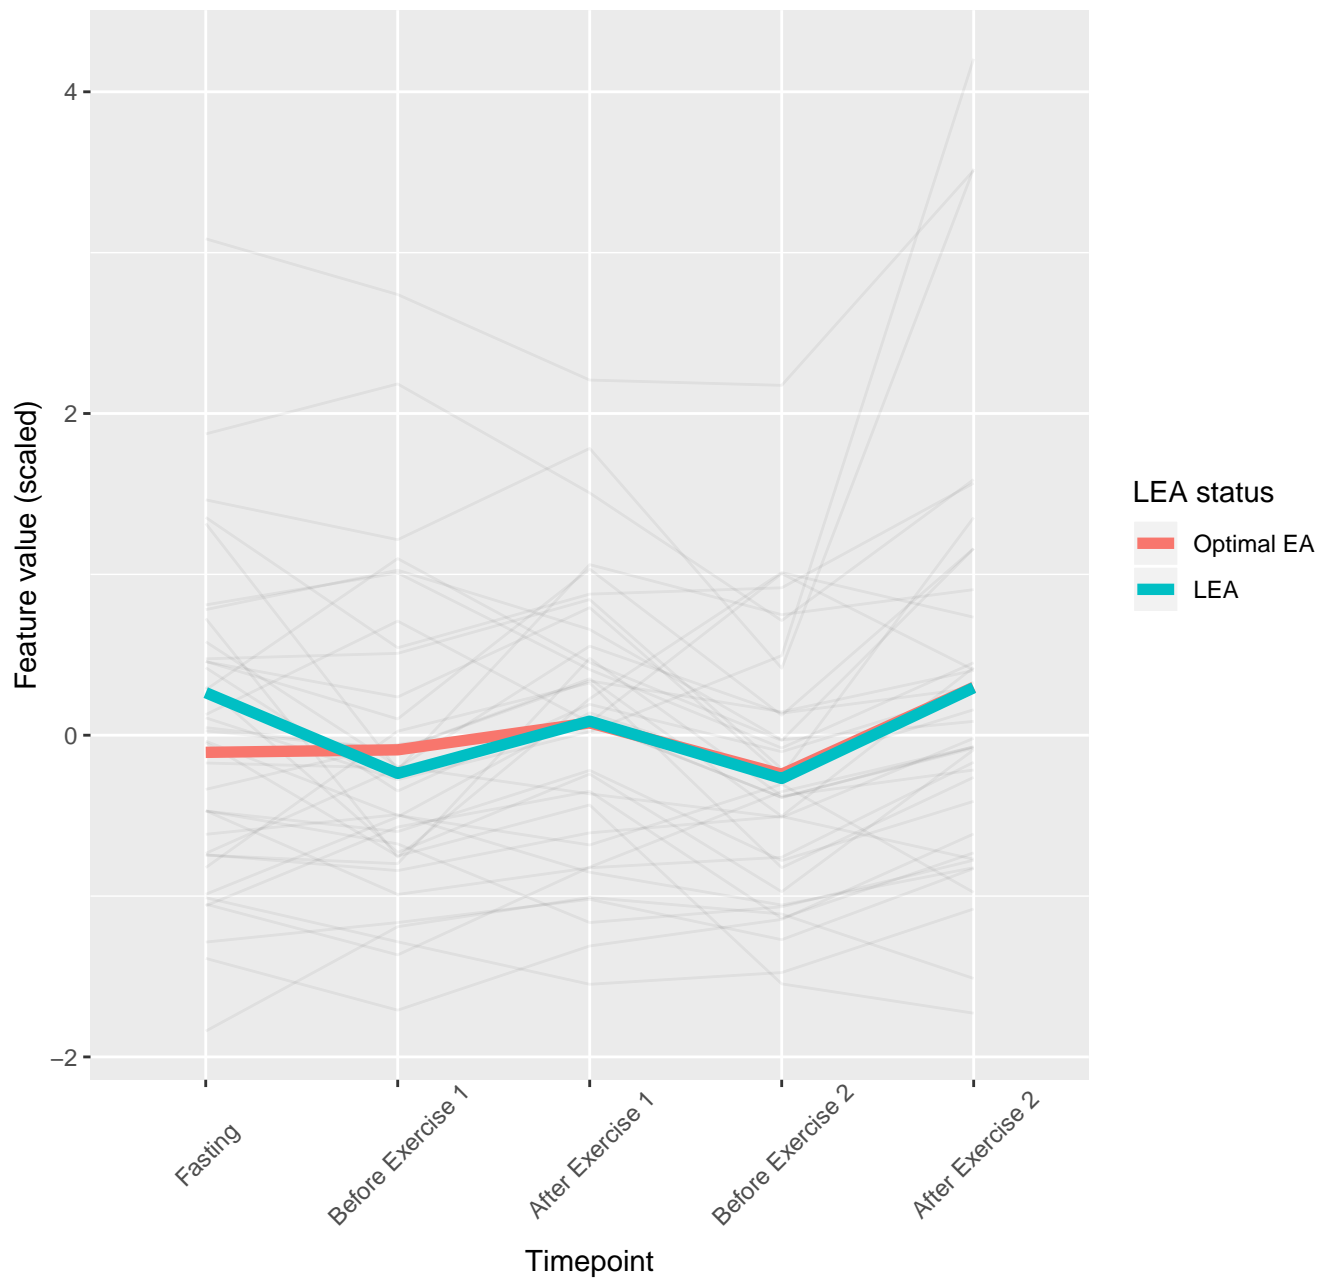

Line plot of LPC(22:5)

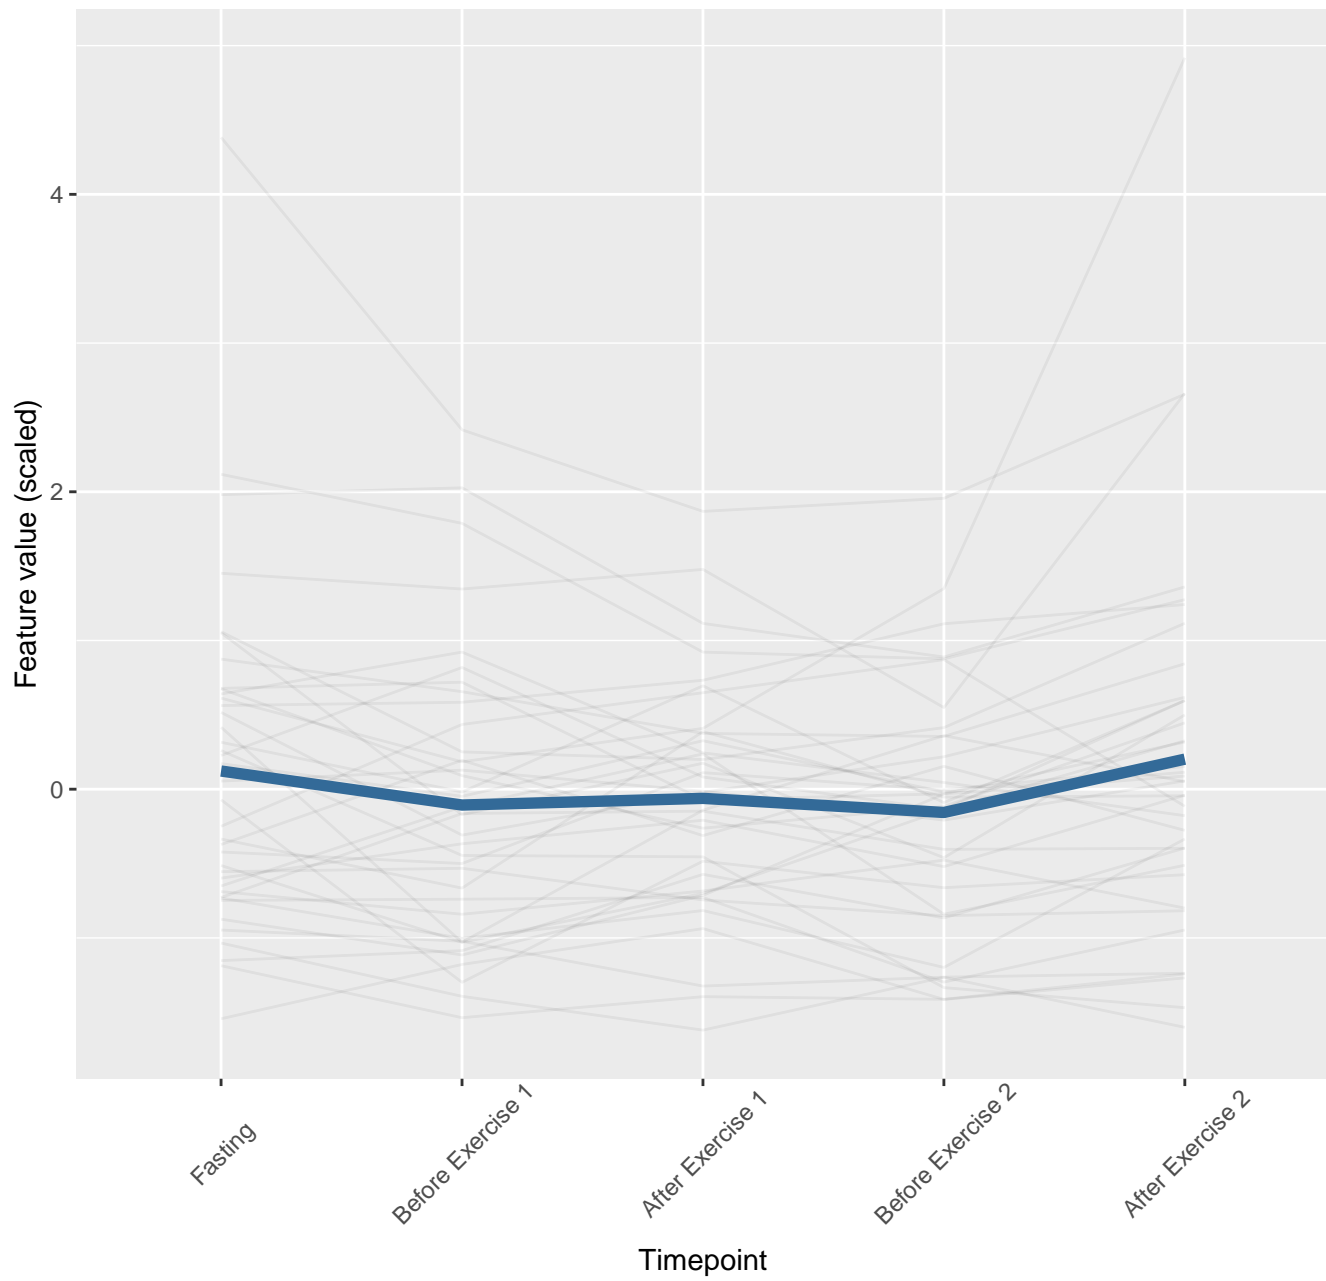

Line plot of LPC(22:5)

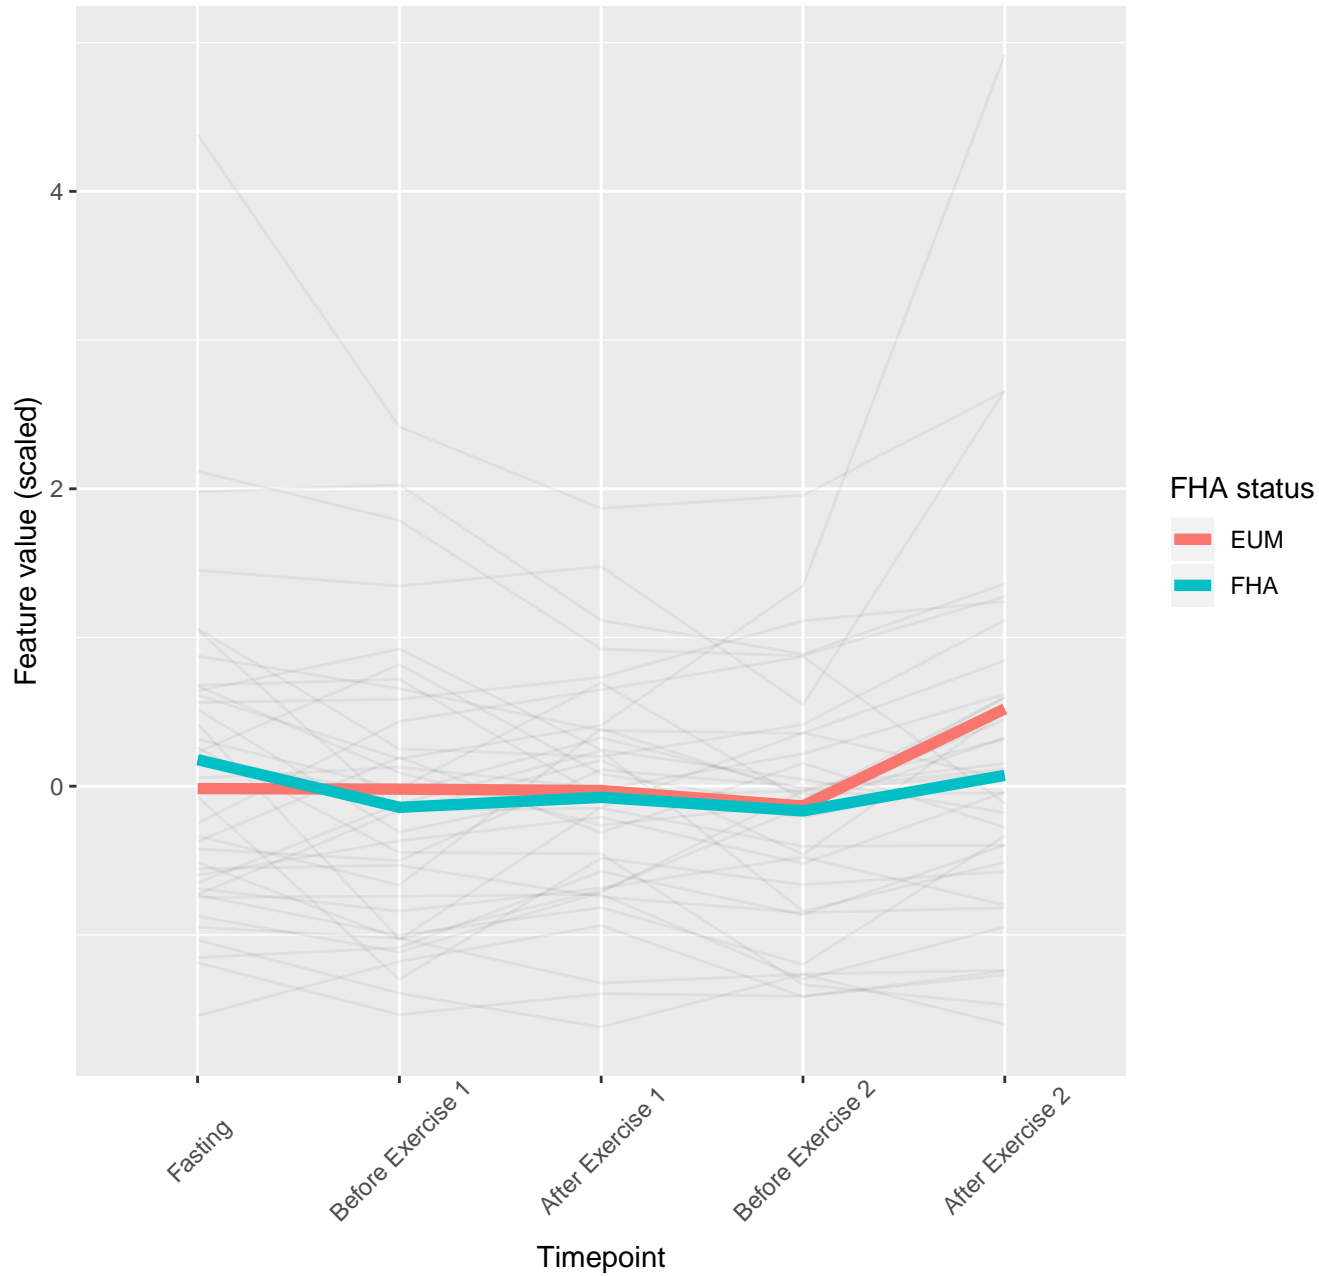



Line plot of LPC(22:5)

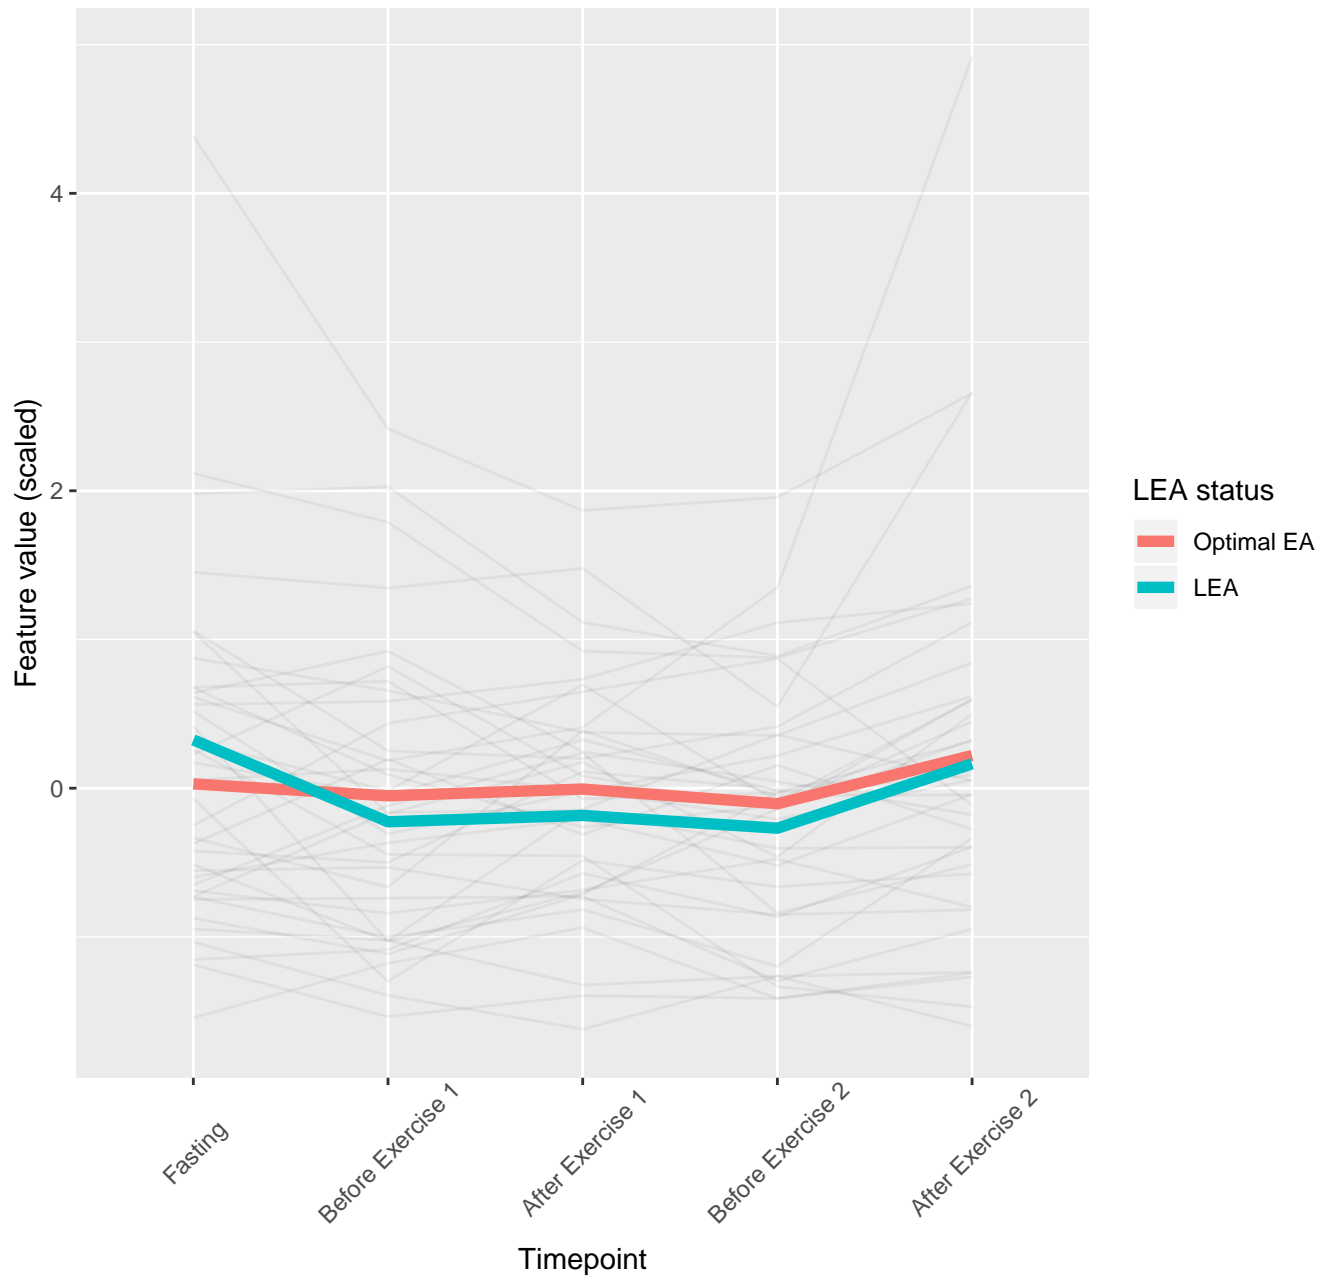

Line plot of LPC(22:6)

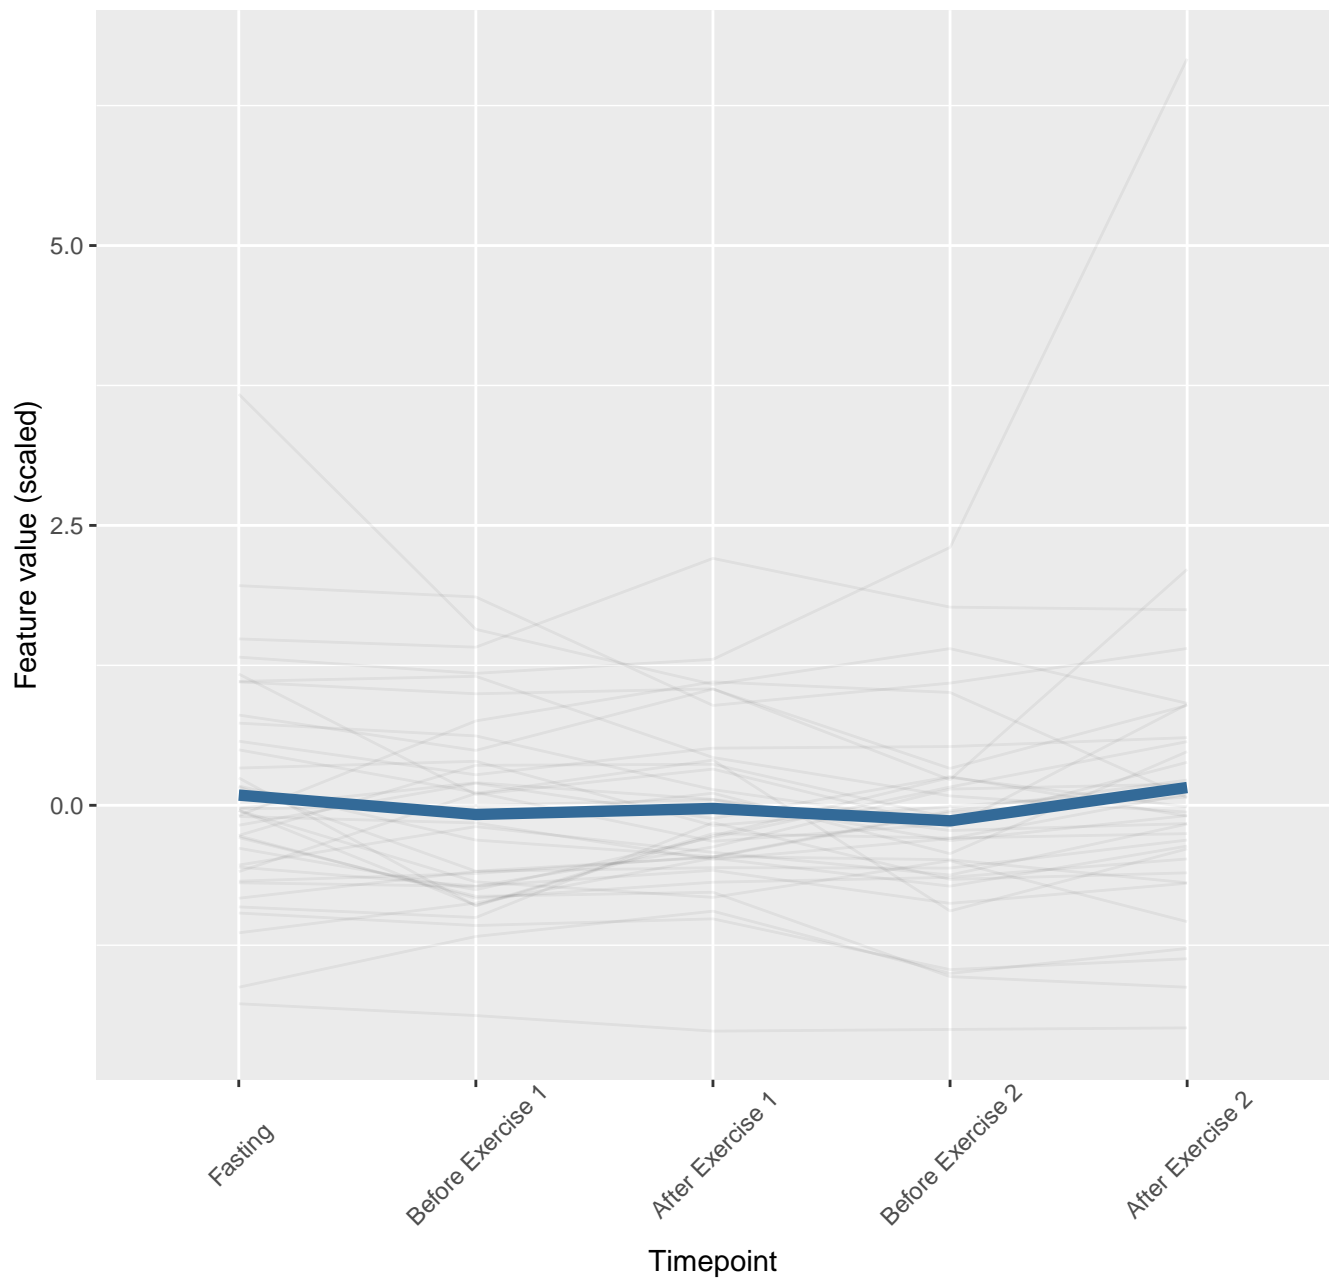

Line plot of LPC(22:6)

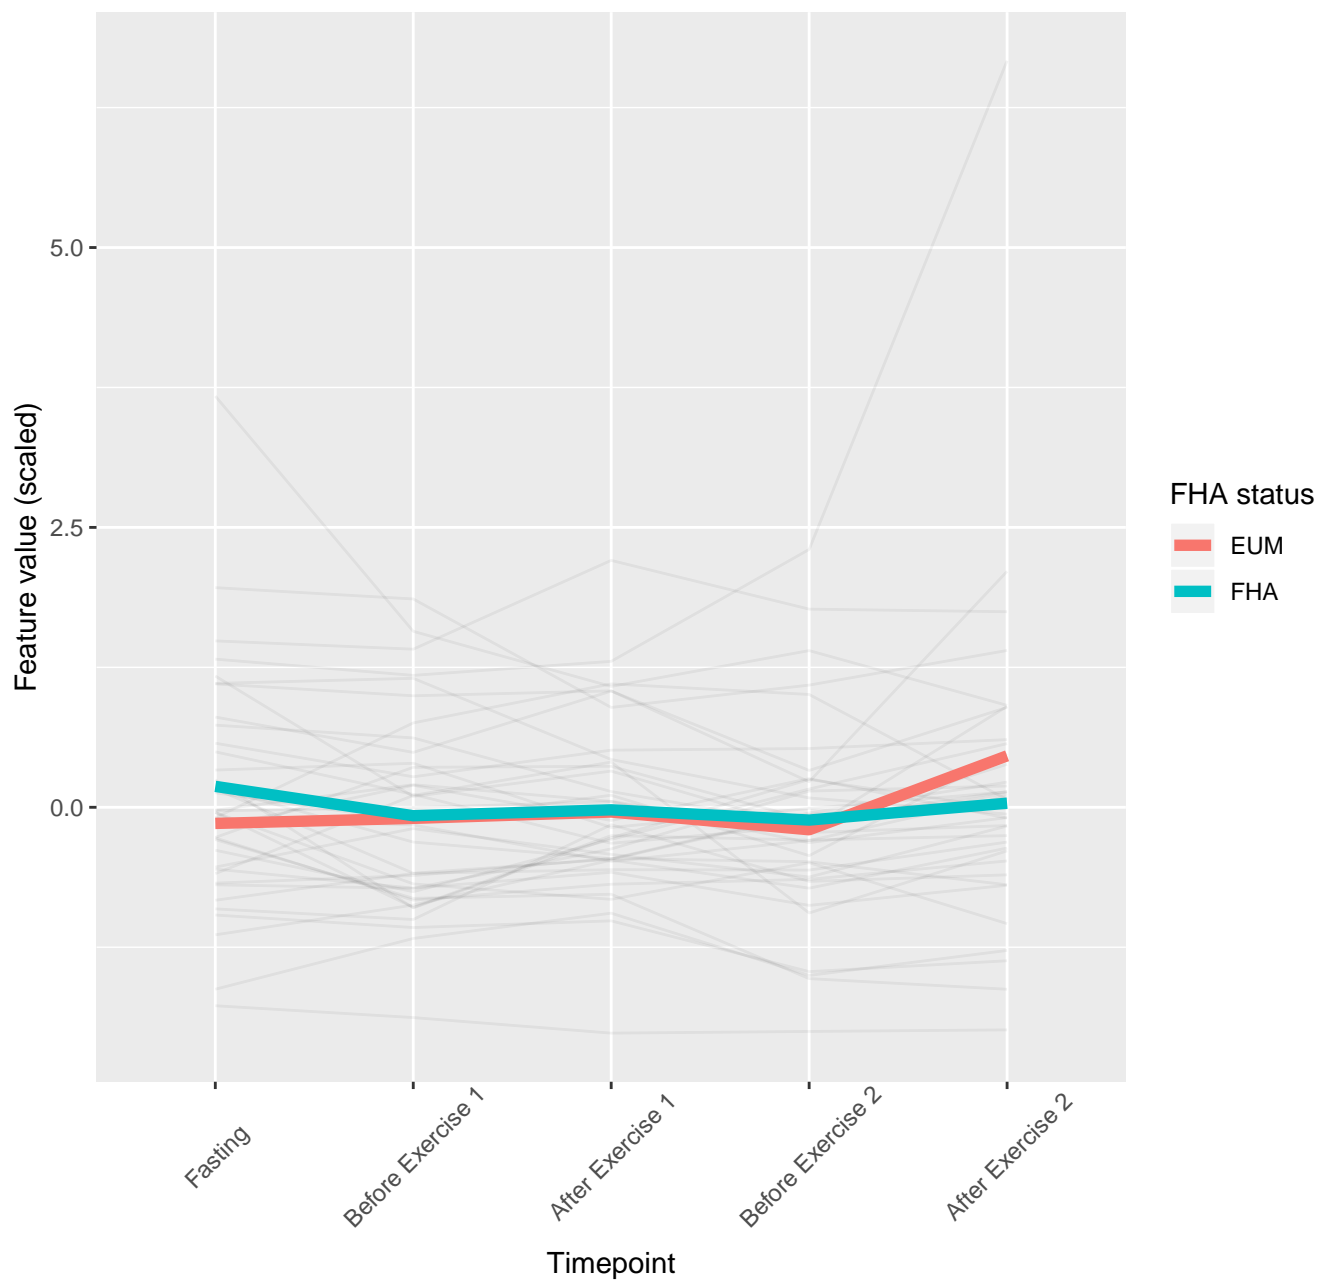

Line plot of LPC(22:6)

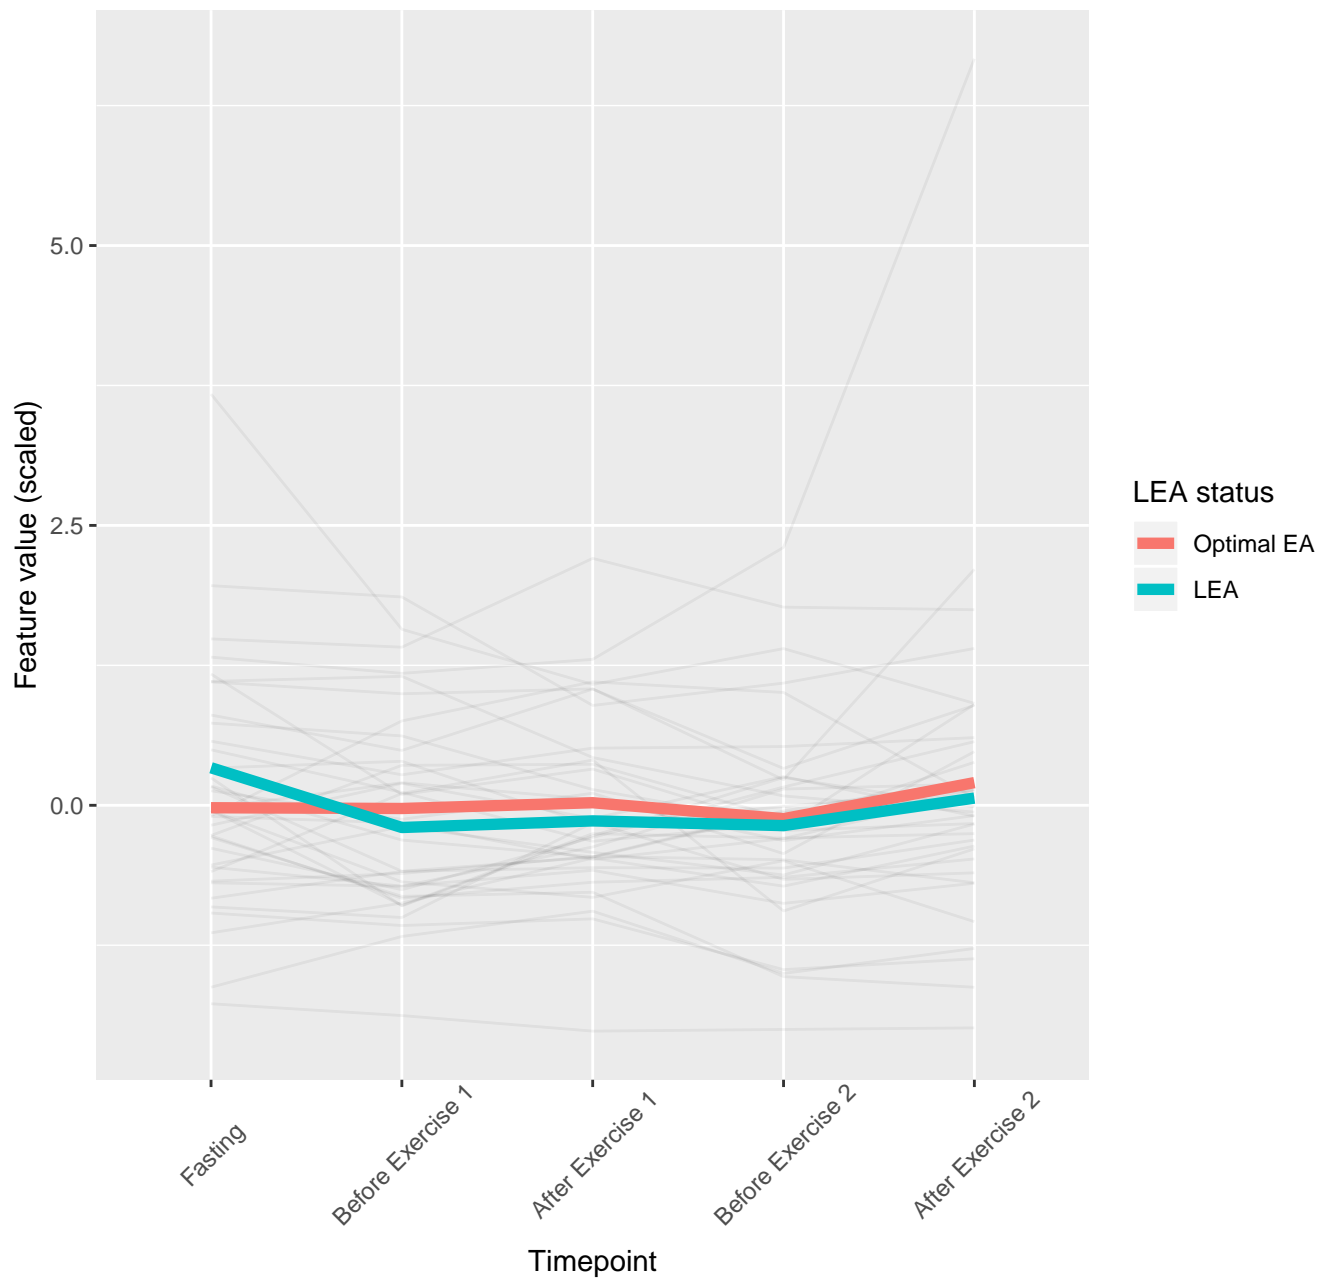

Line plot of PC(30:0)

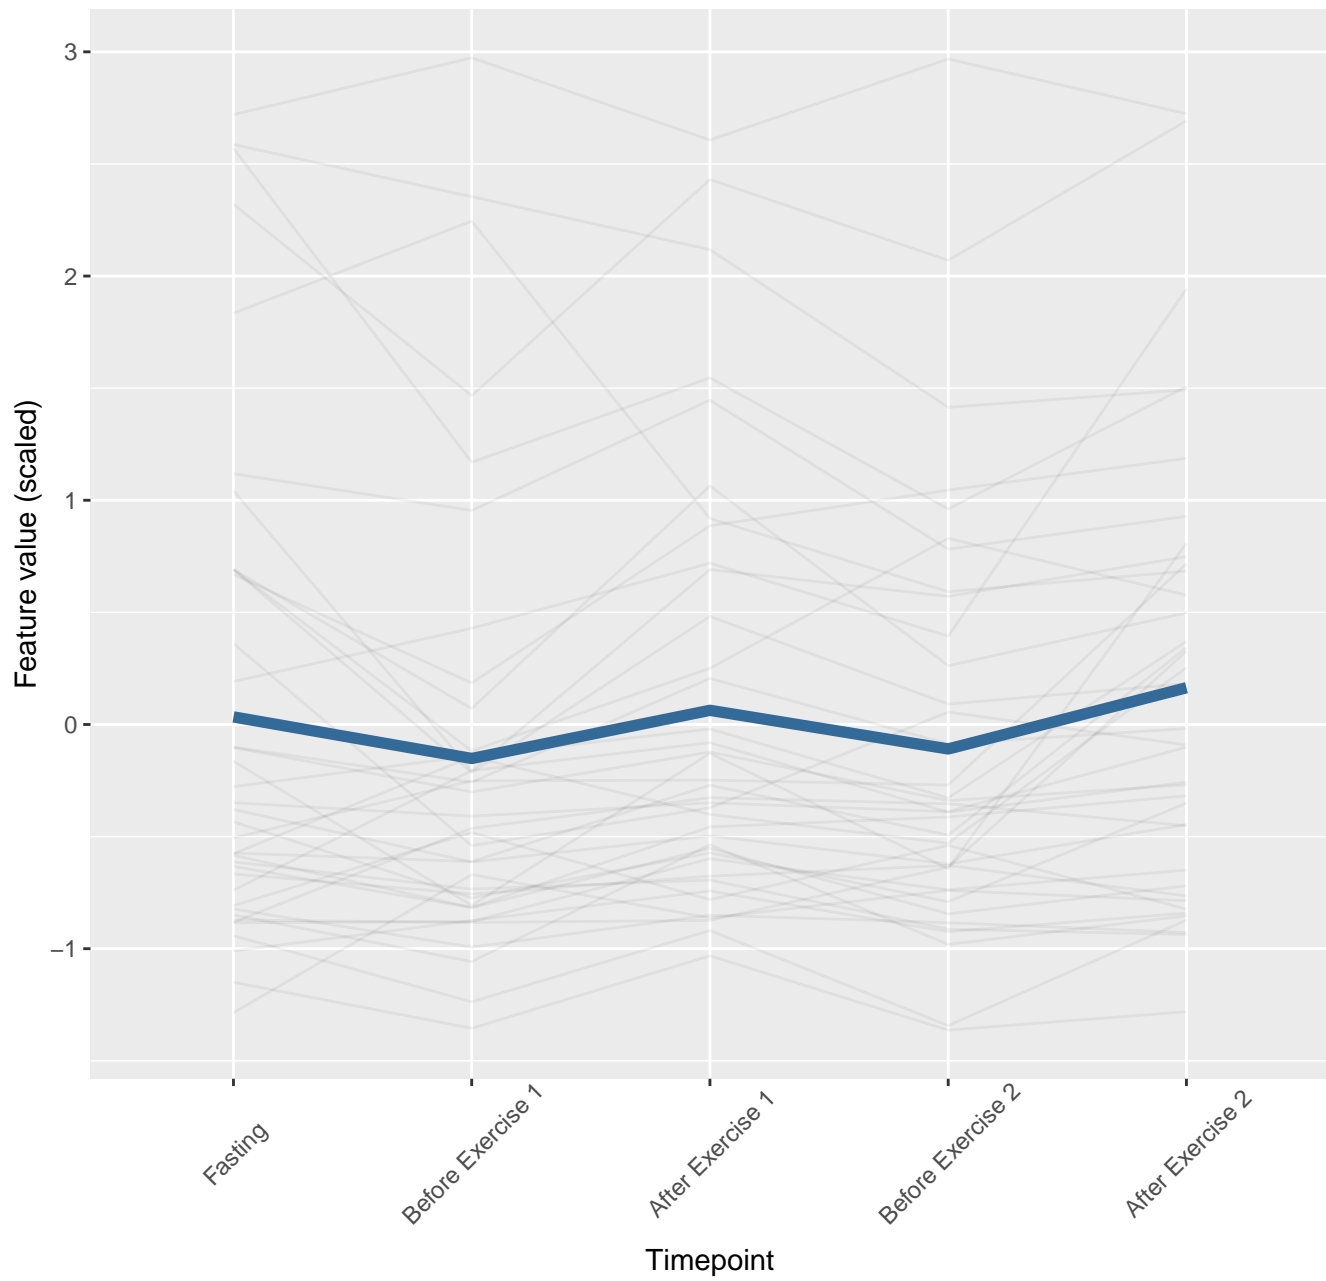

Line plot of PC(30:0)

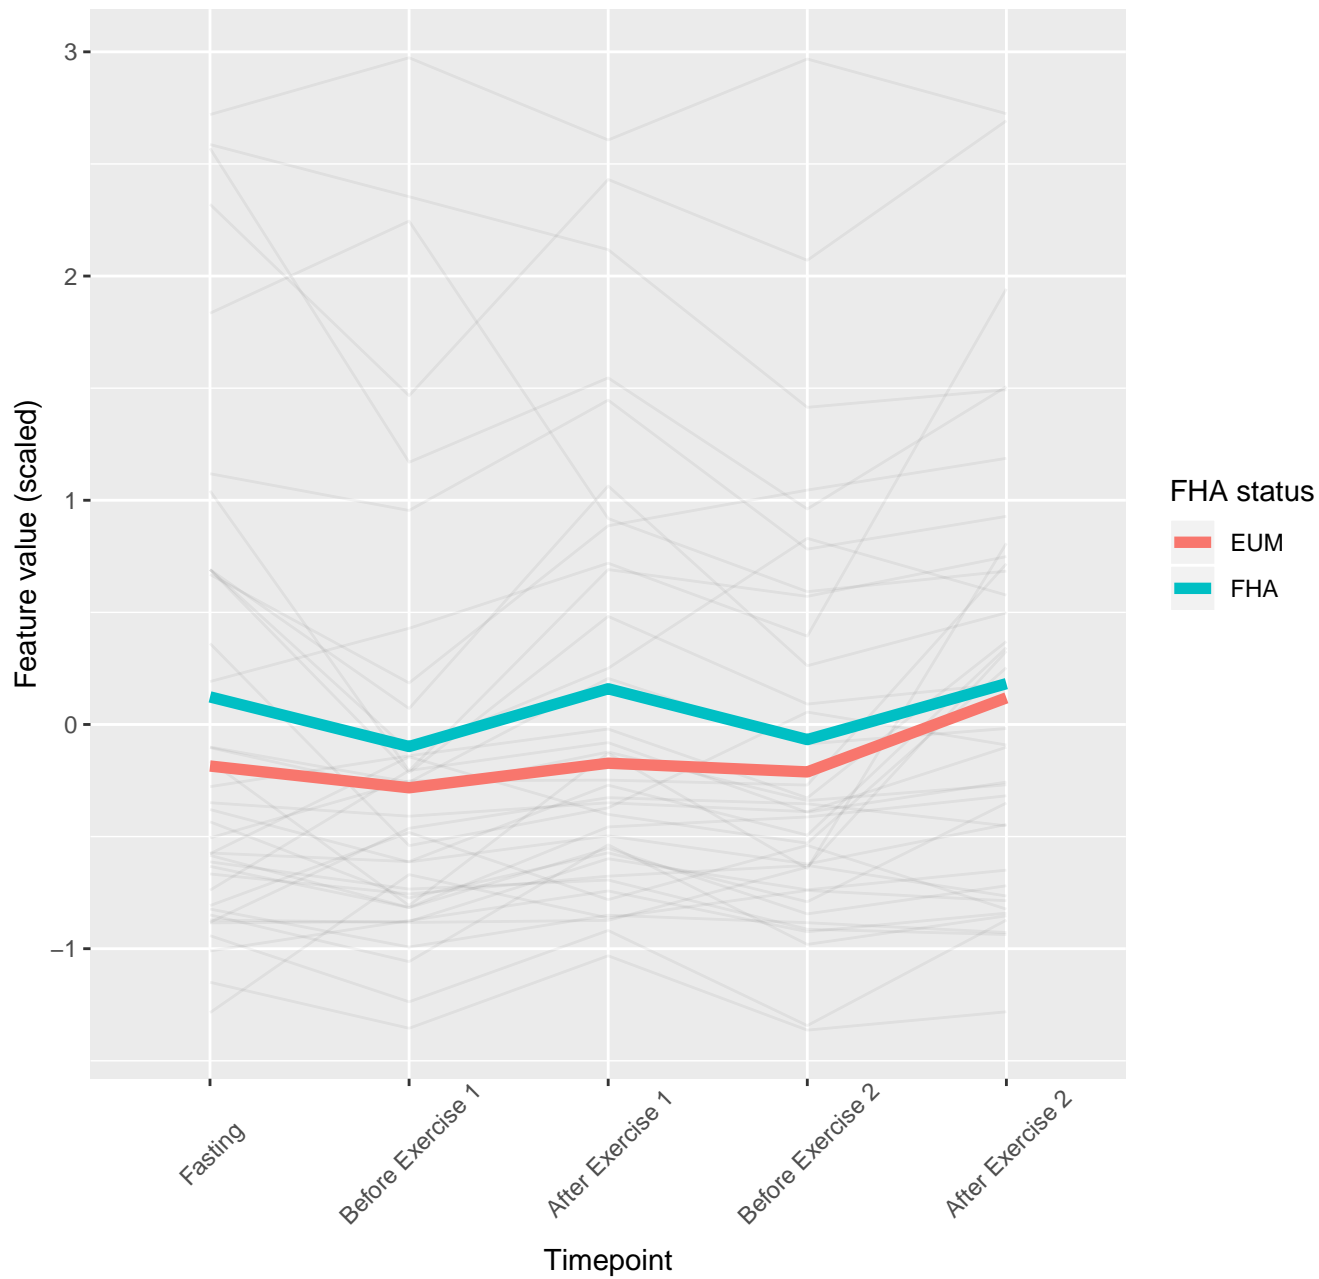

Line plot of PC(30:0)

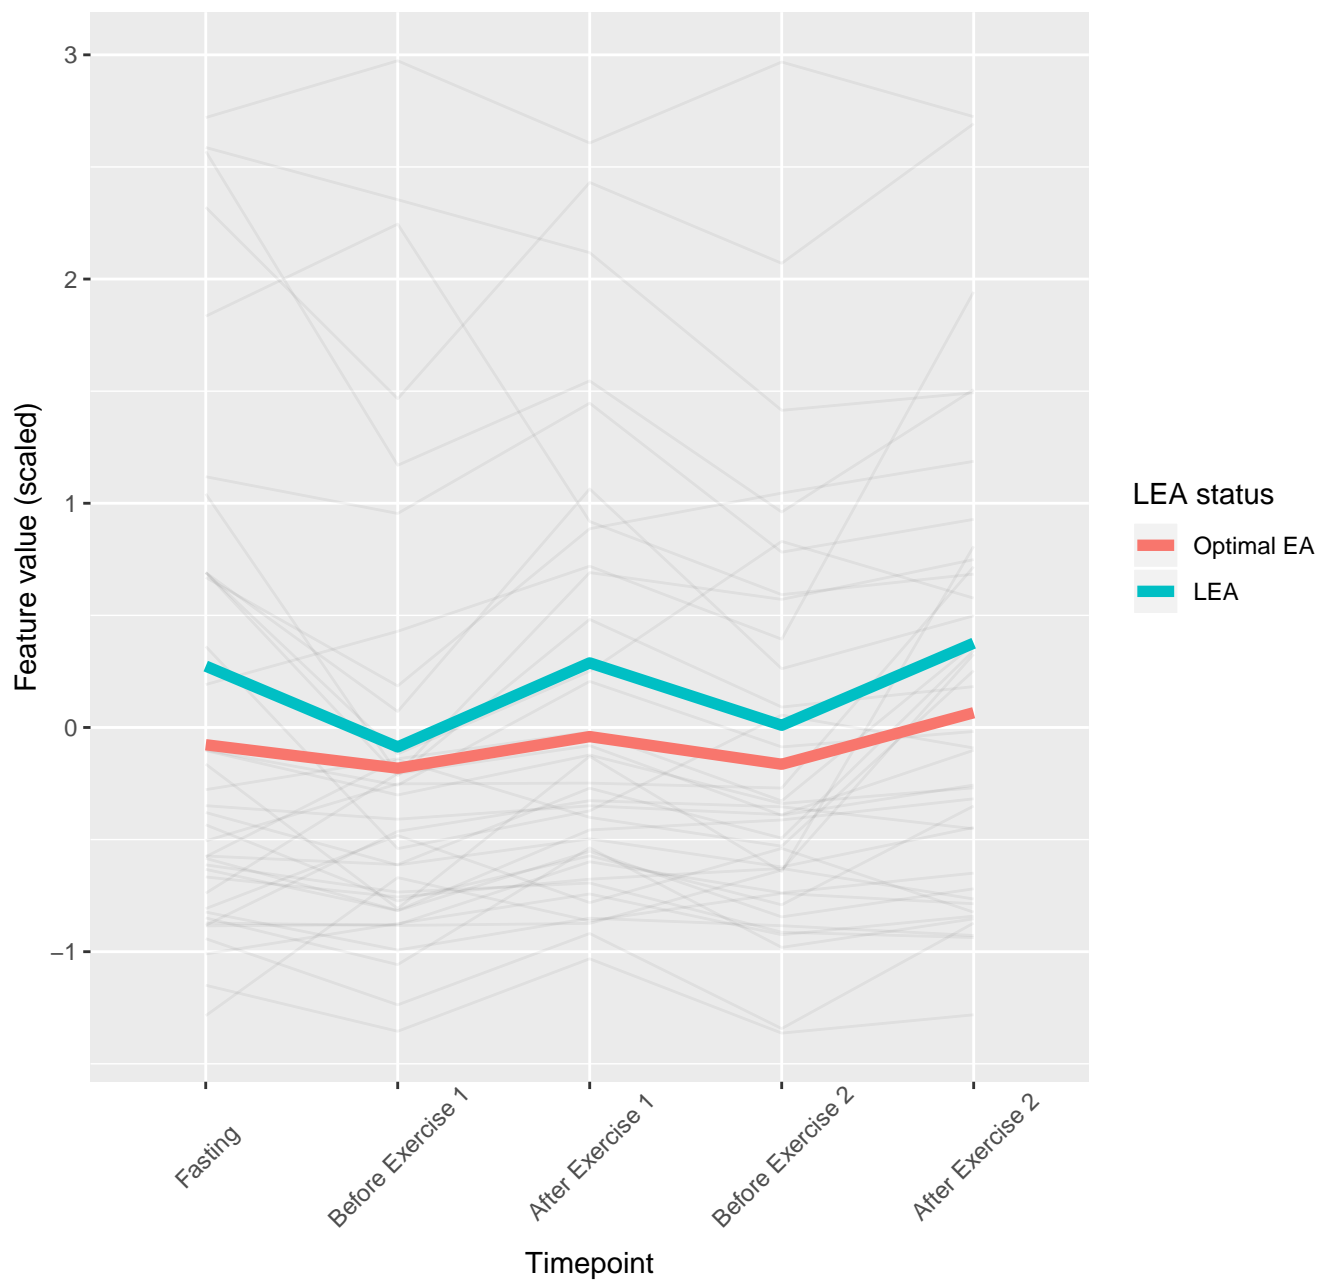

Line plot of PC(31:1)

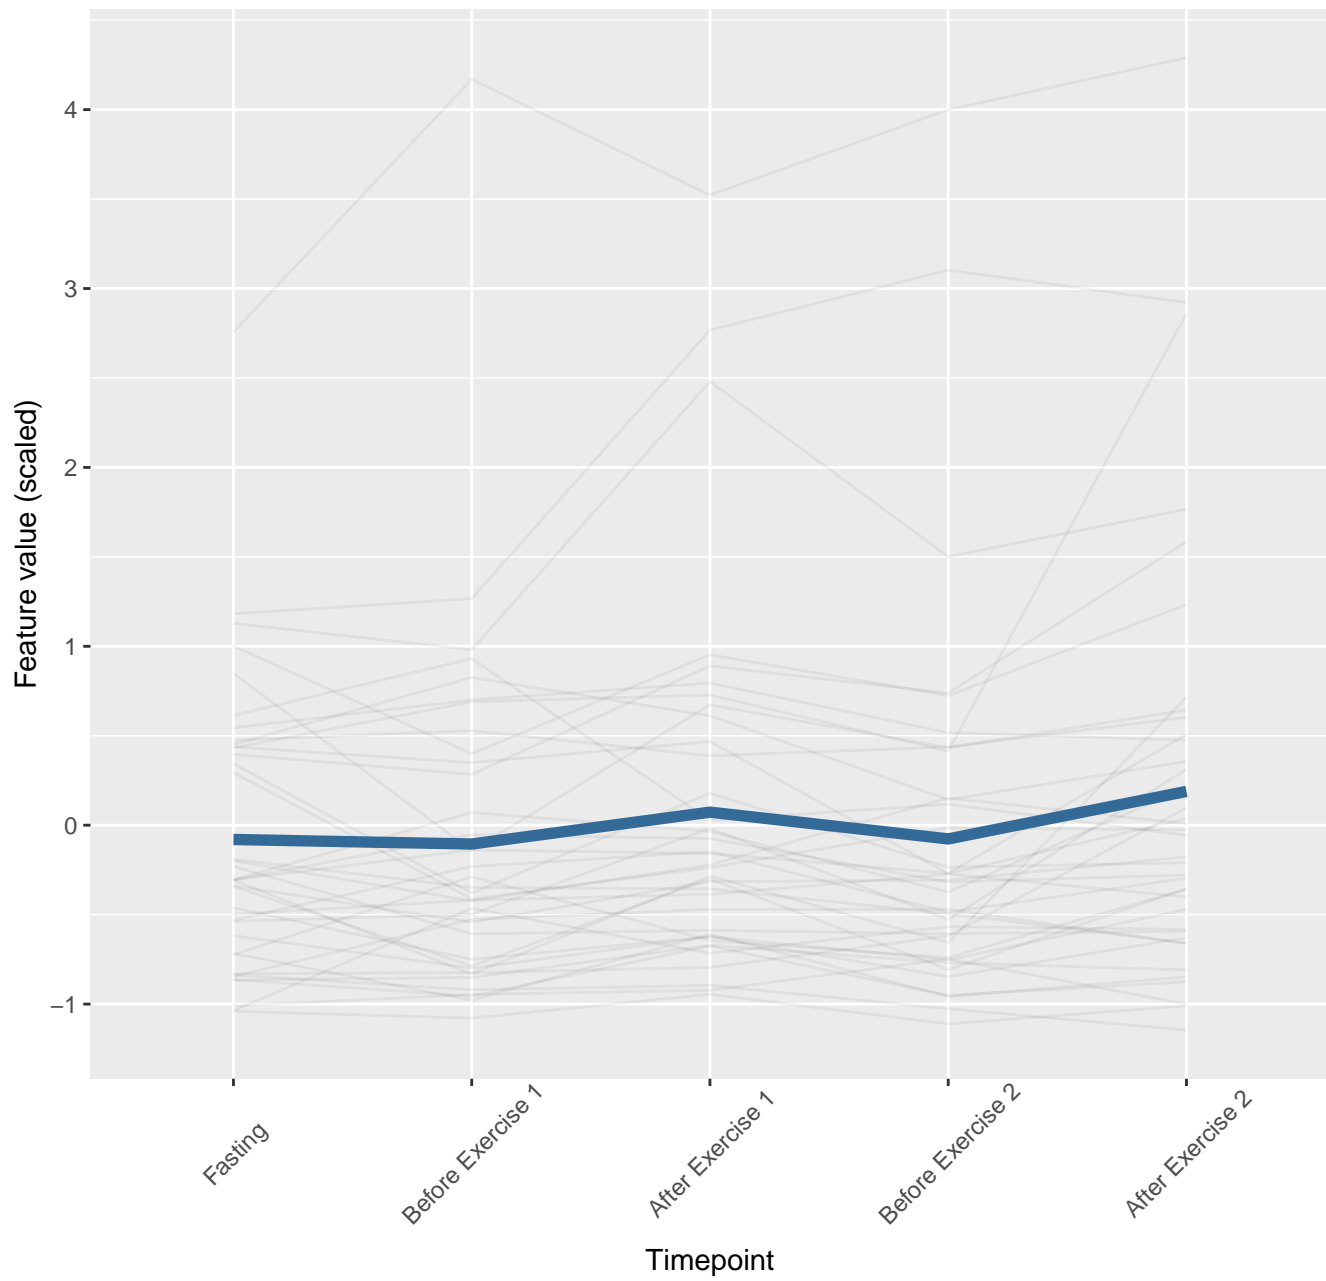



Line plot of PC(31:1)

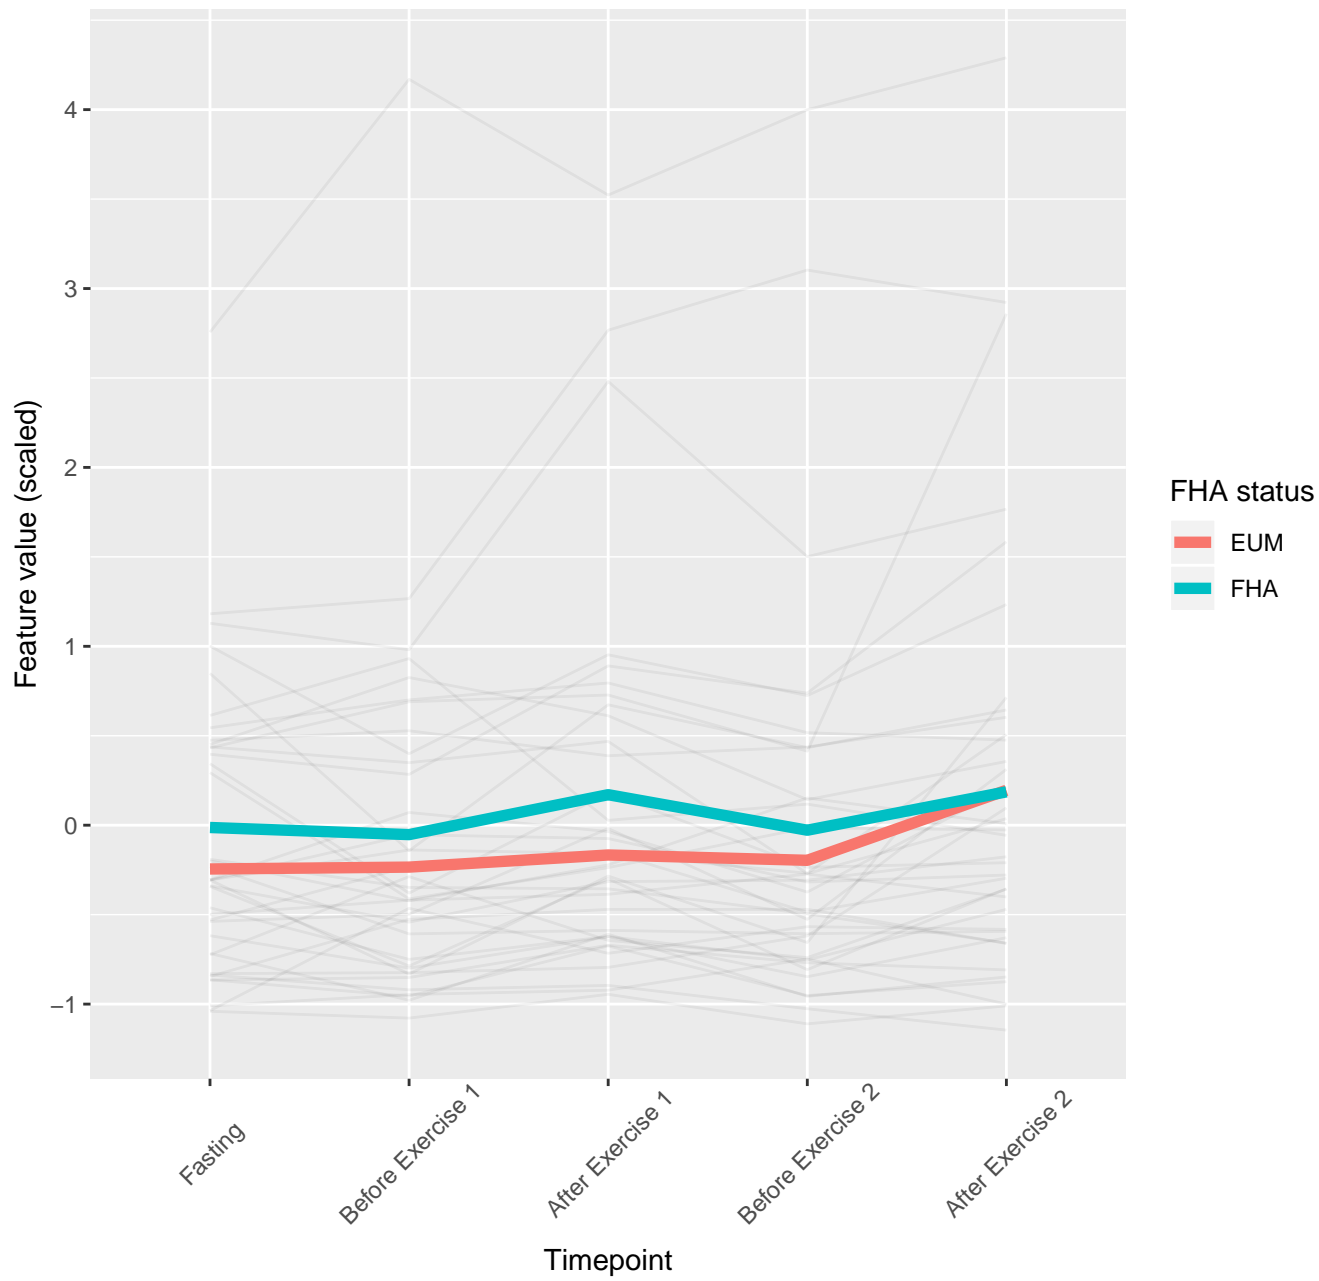

Line plot of PC(31:1)

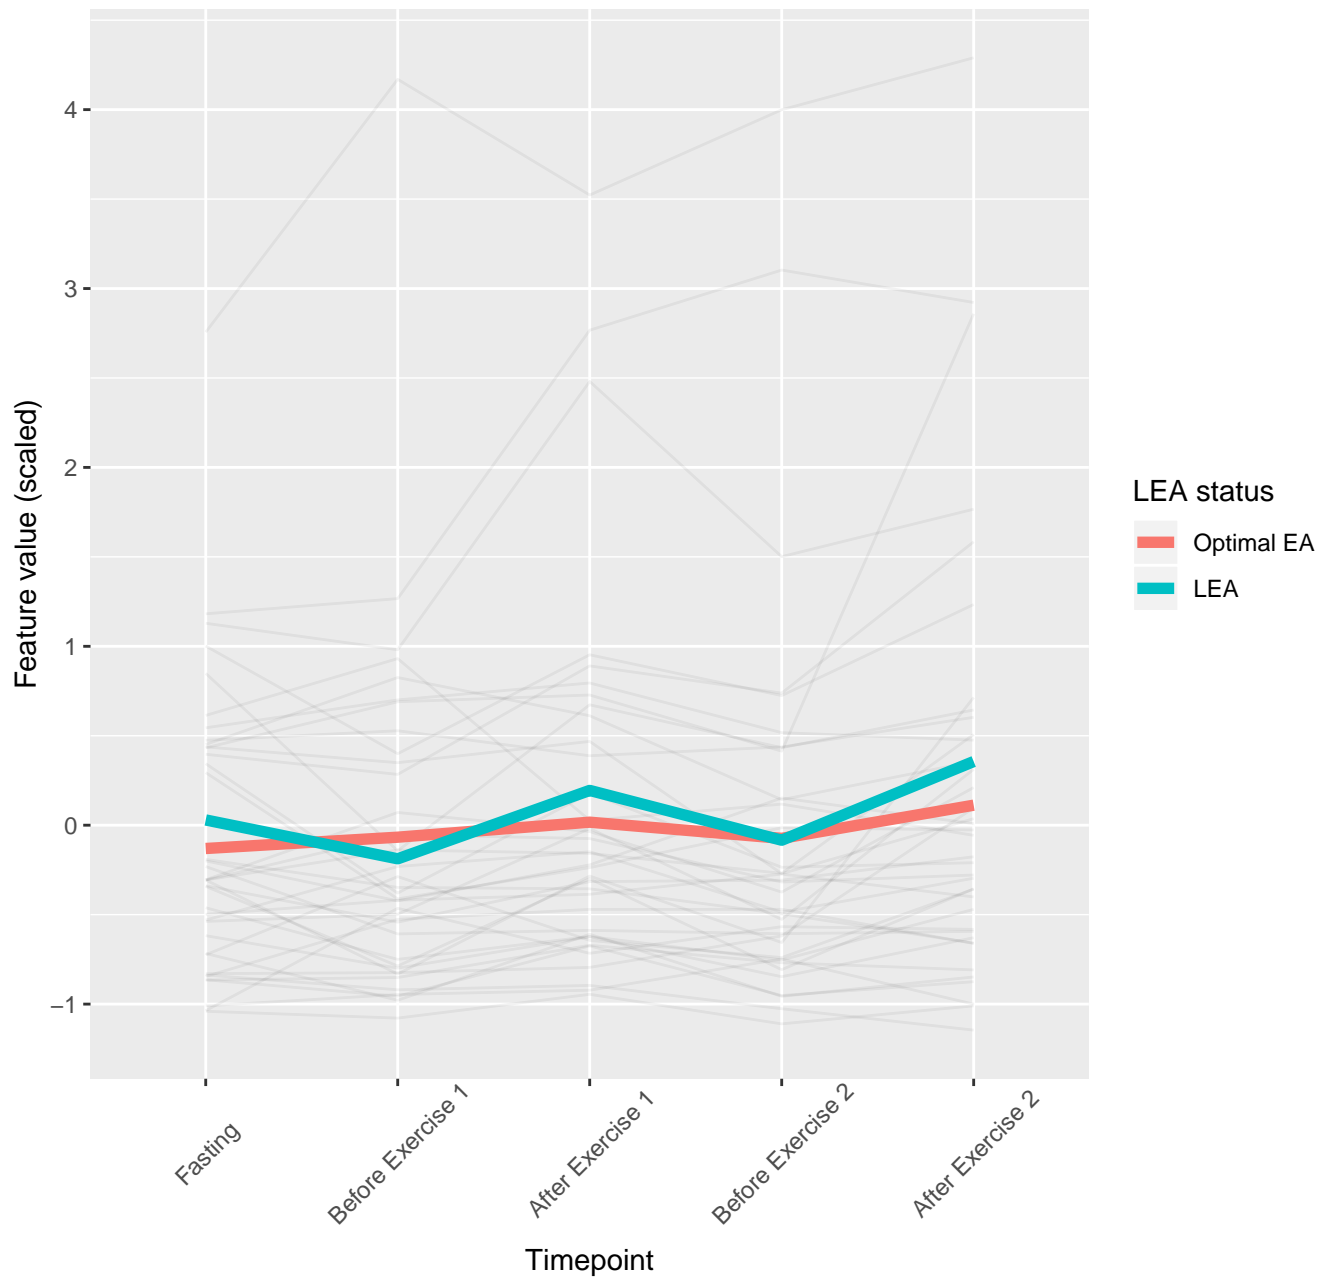

Line plot of PC(32:0)

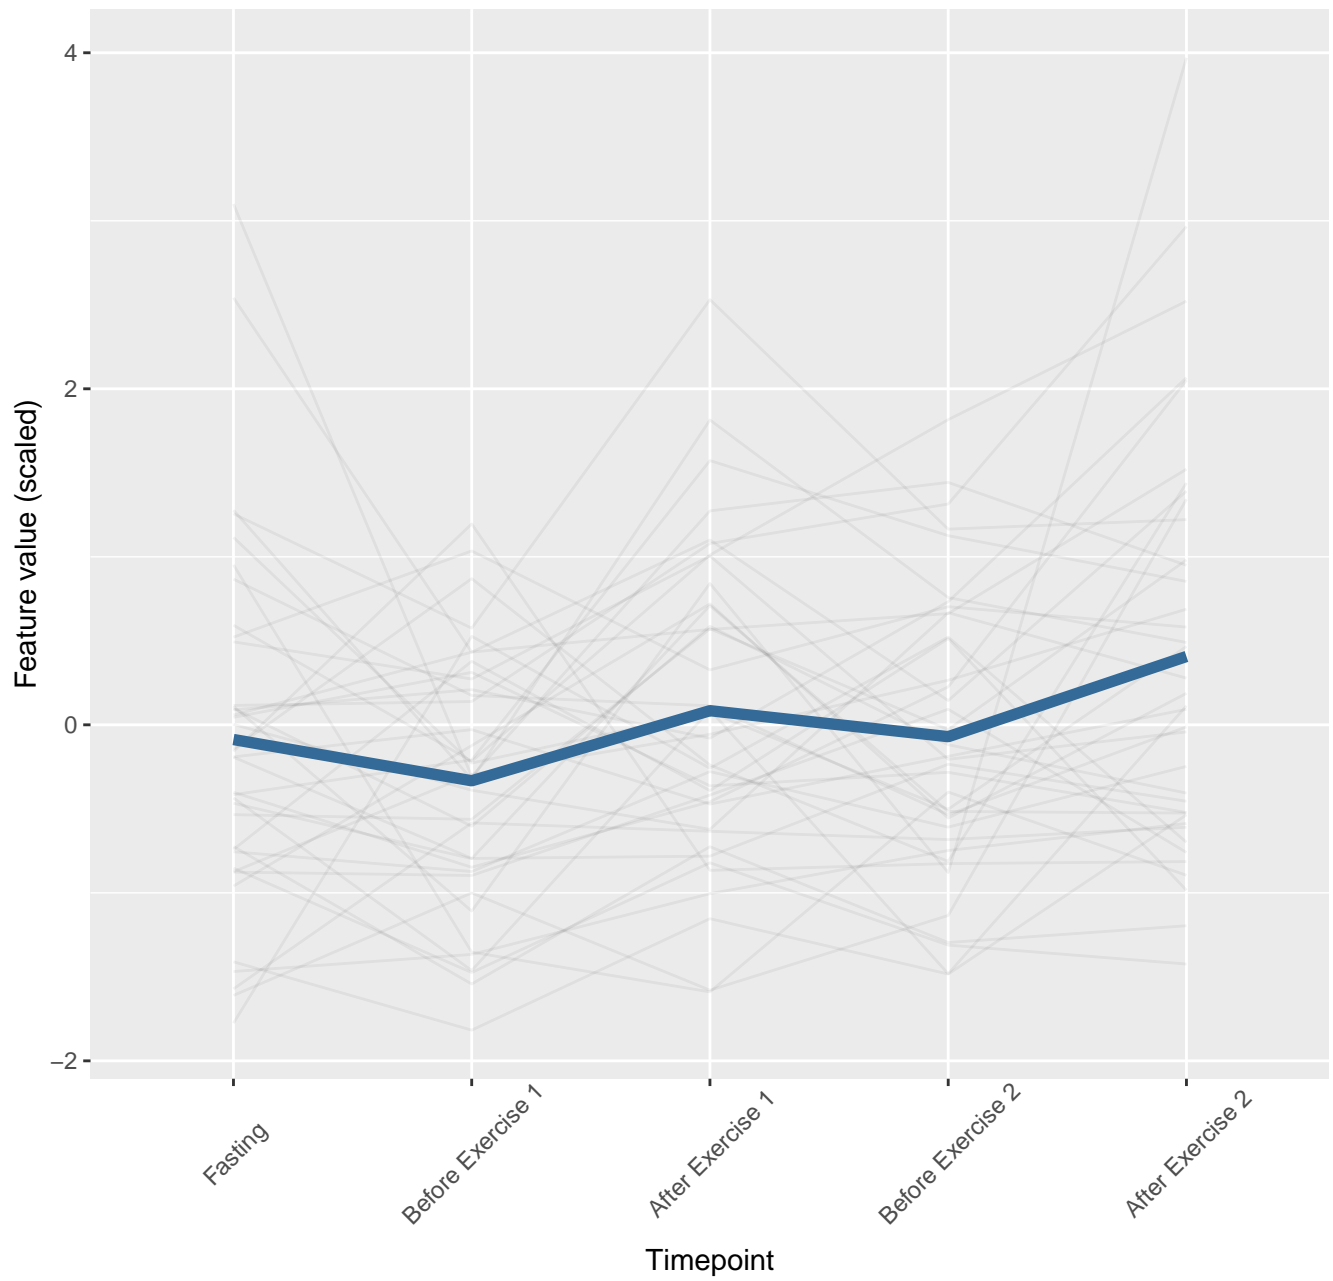

Line plot of PC(32:0)

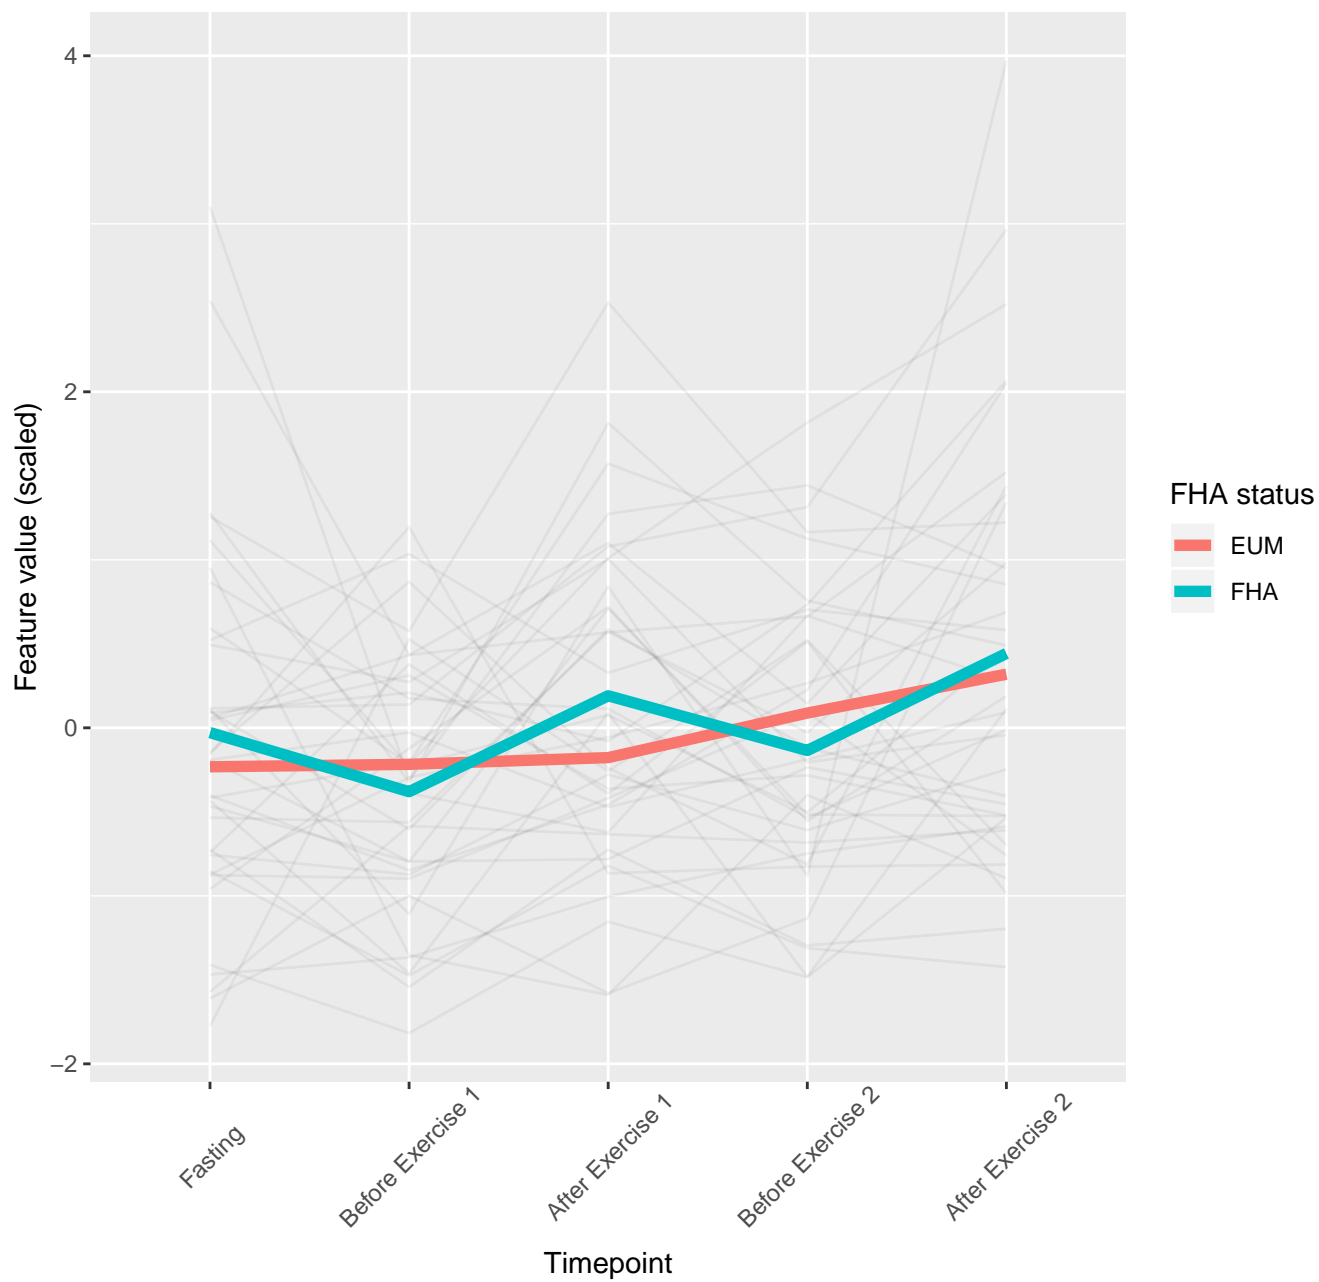

Line plot of PC(32:0)

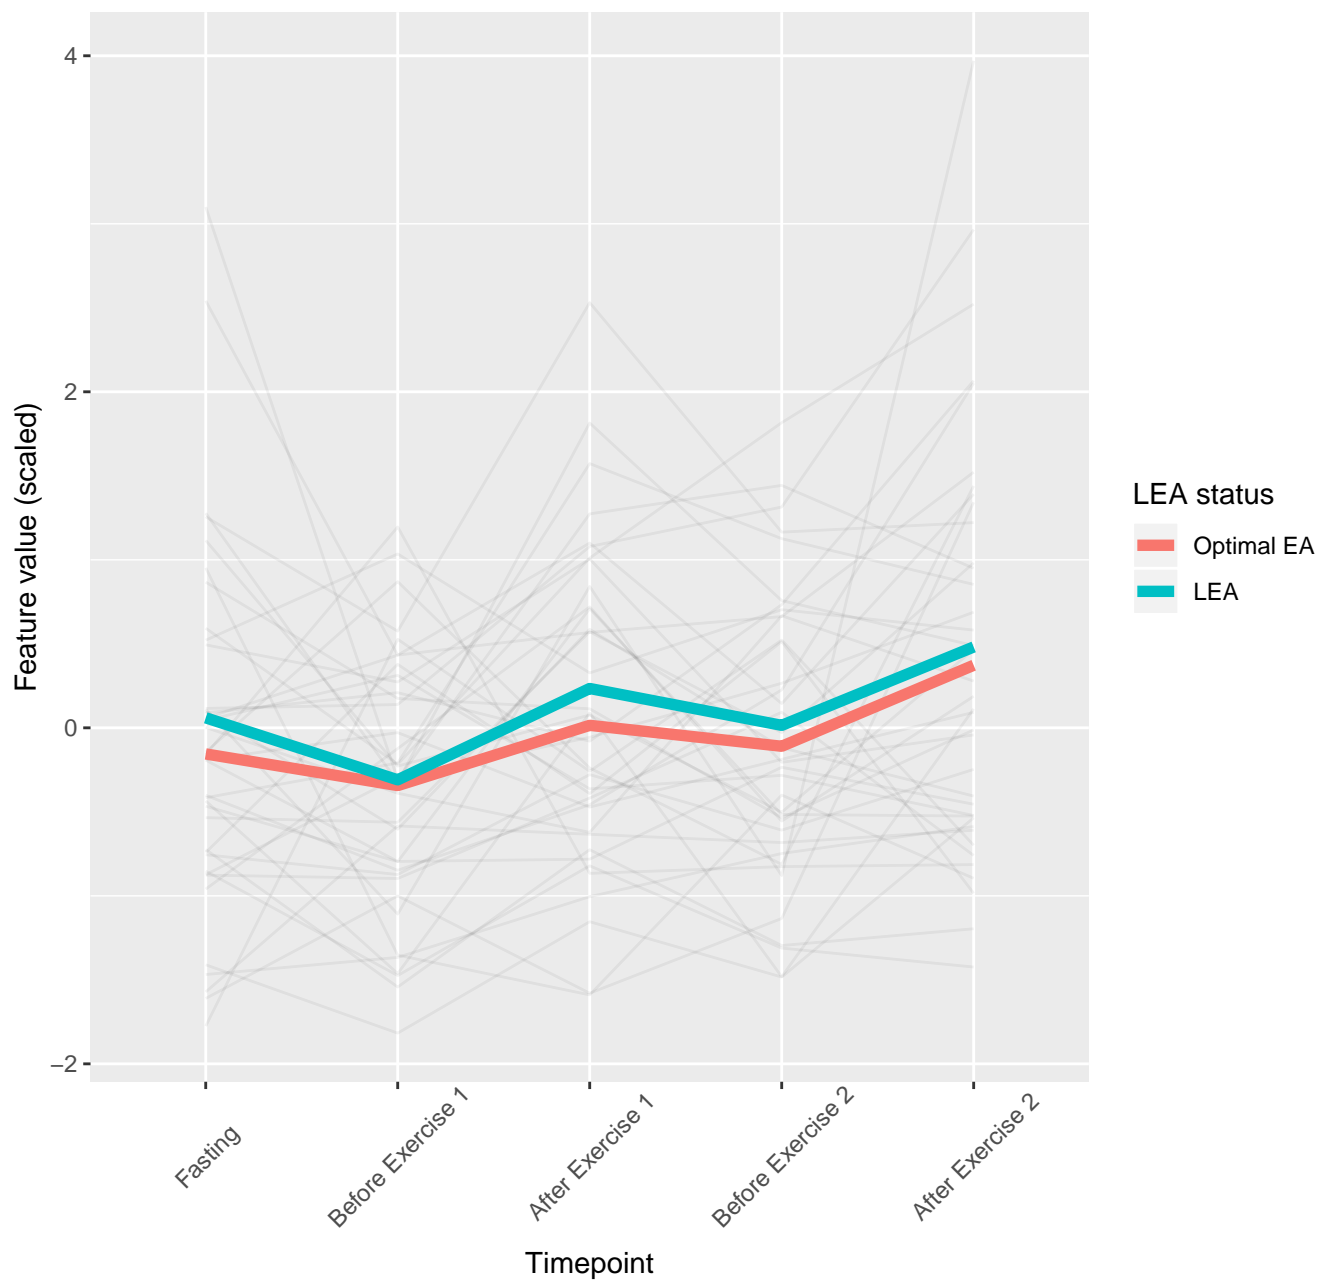

Line plot of PC(32:1)

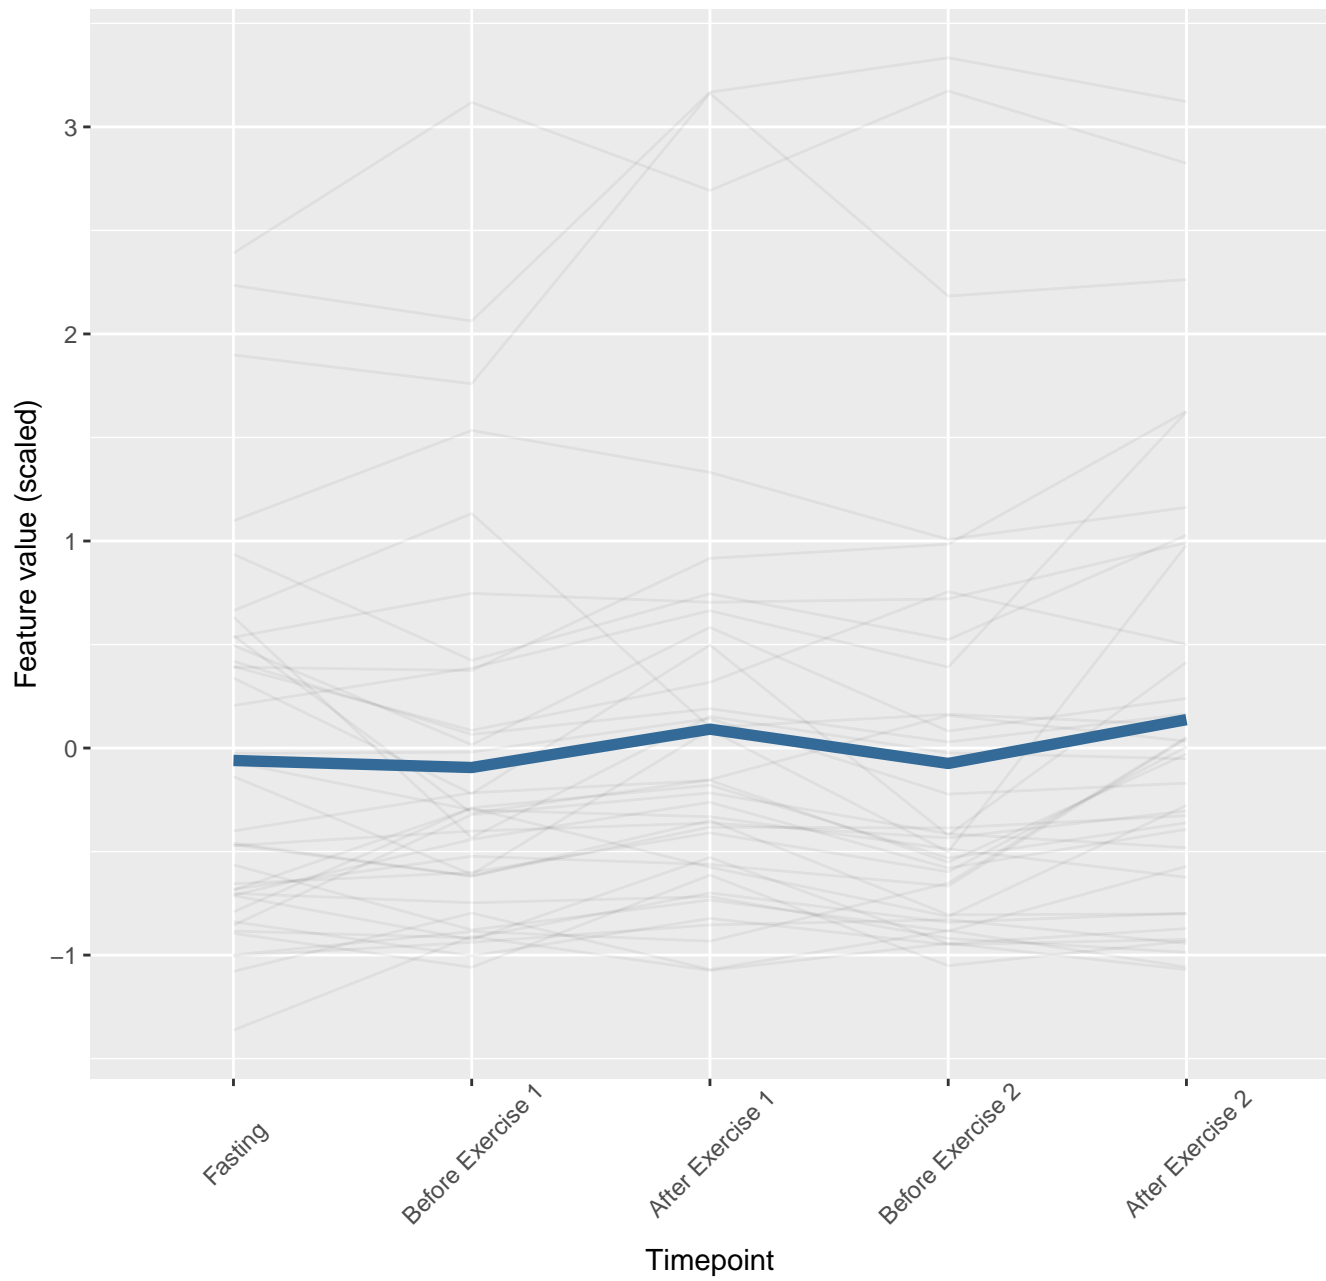

Line plot of PC(32:1)

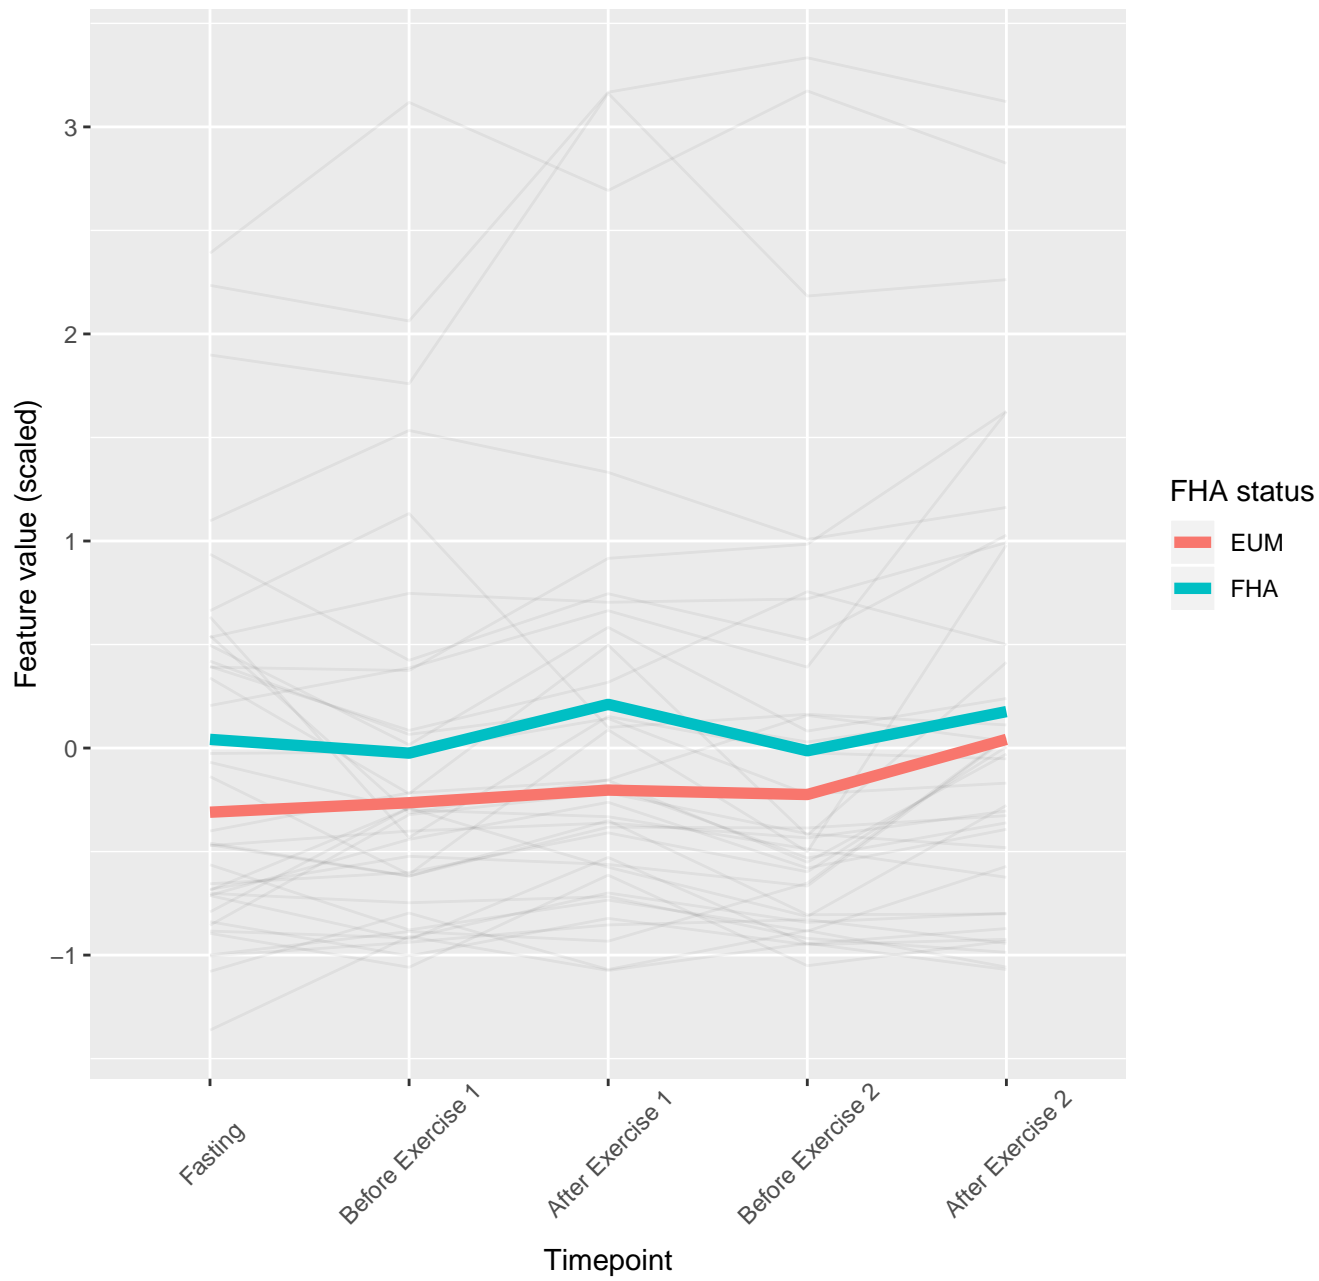

Line plot of PC(32:1)

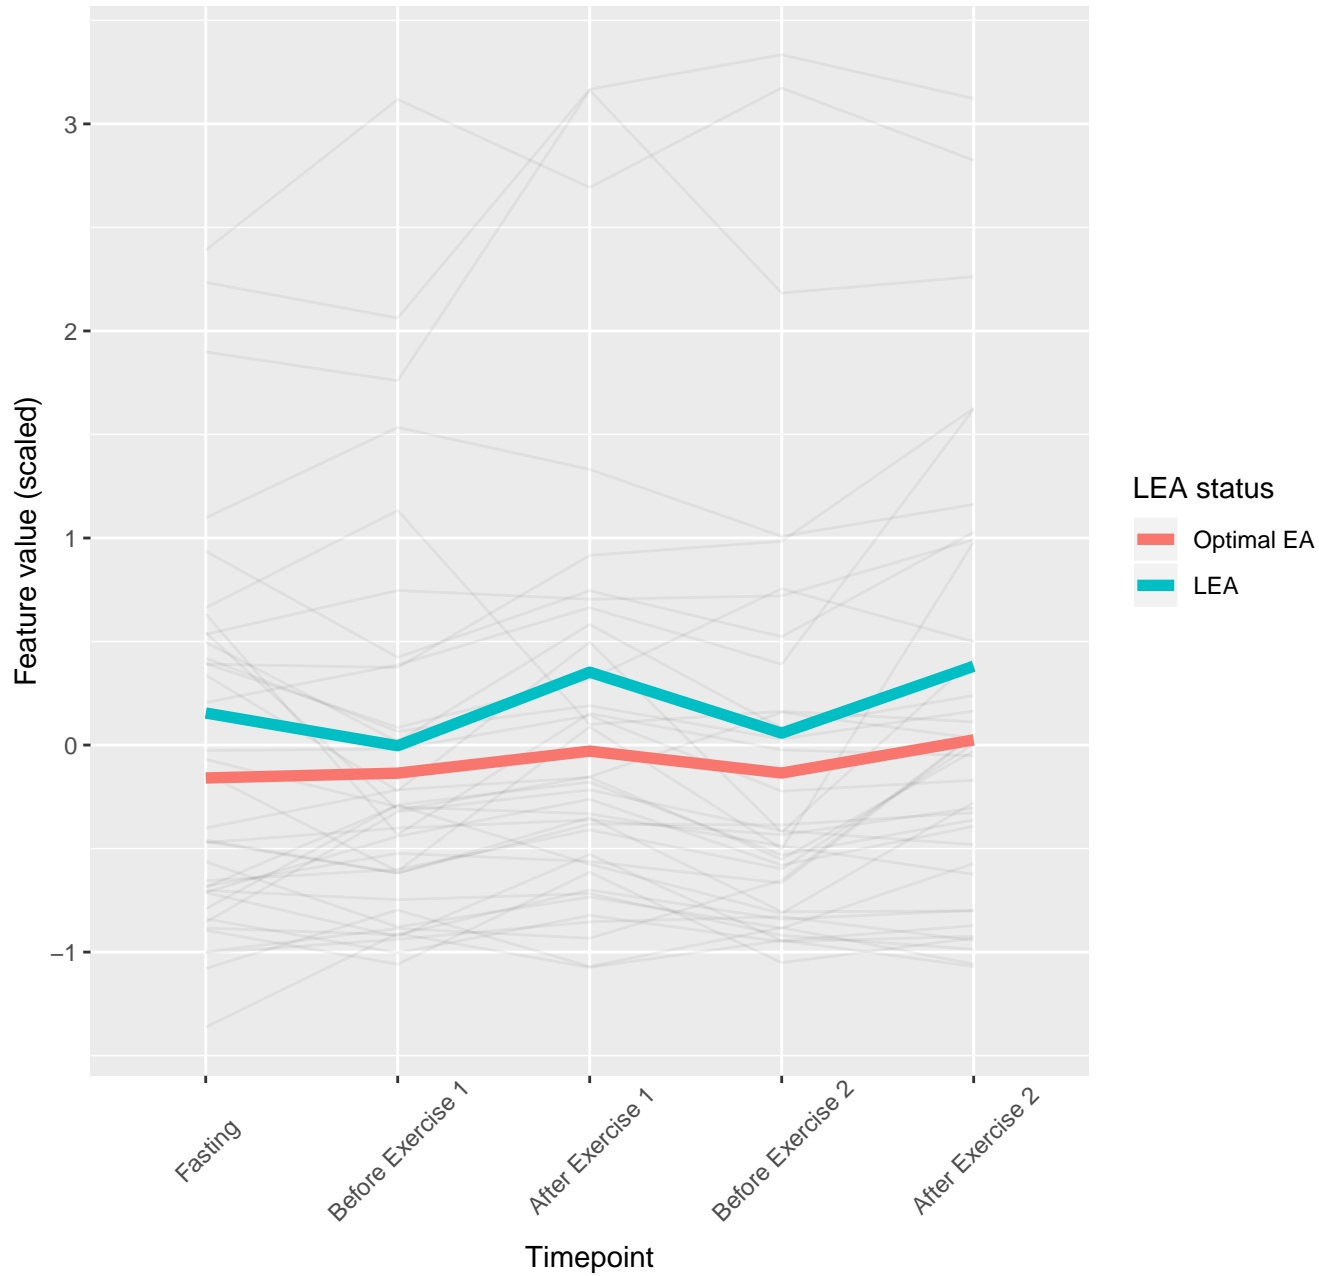



Line plot of PC(32:2)

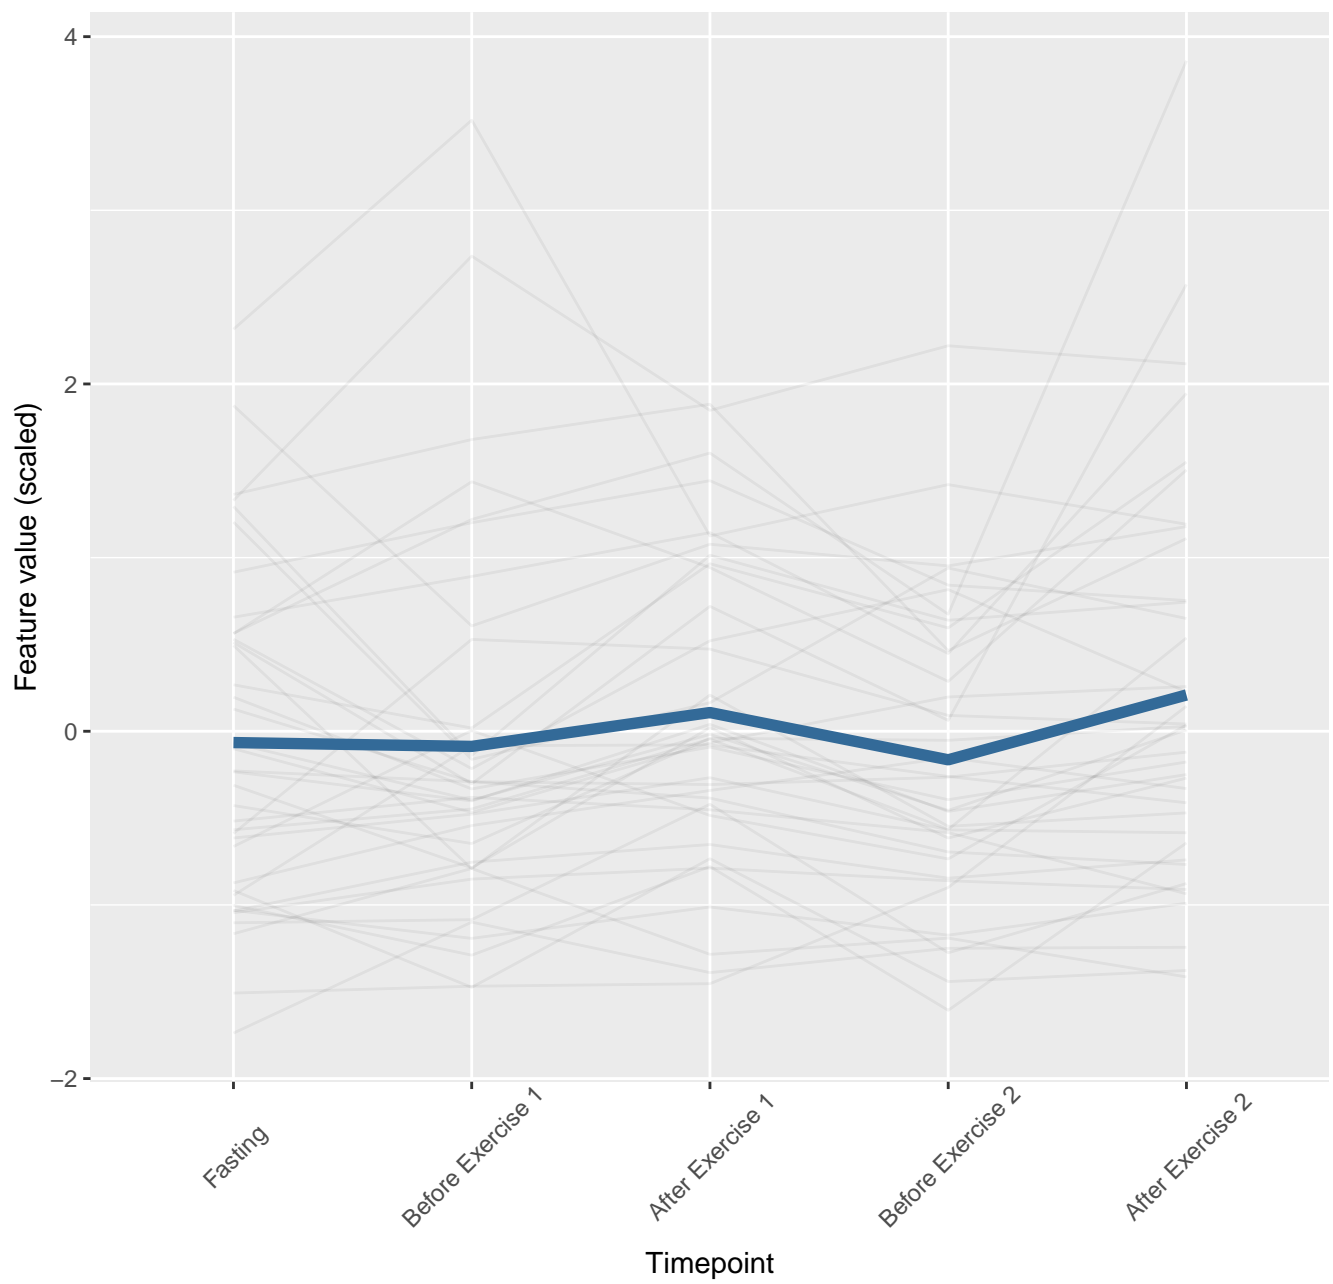

Line plot of PC(32:2)

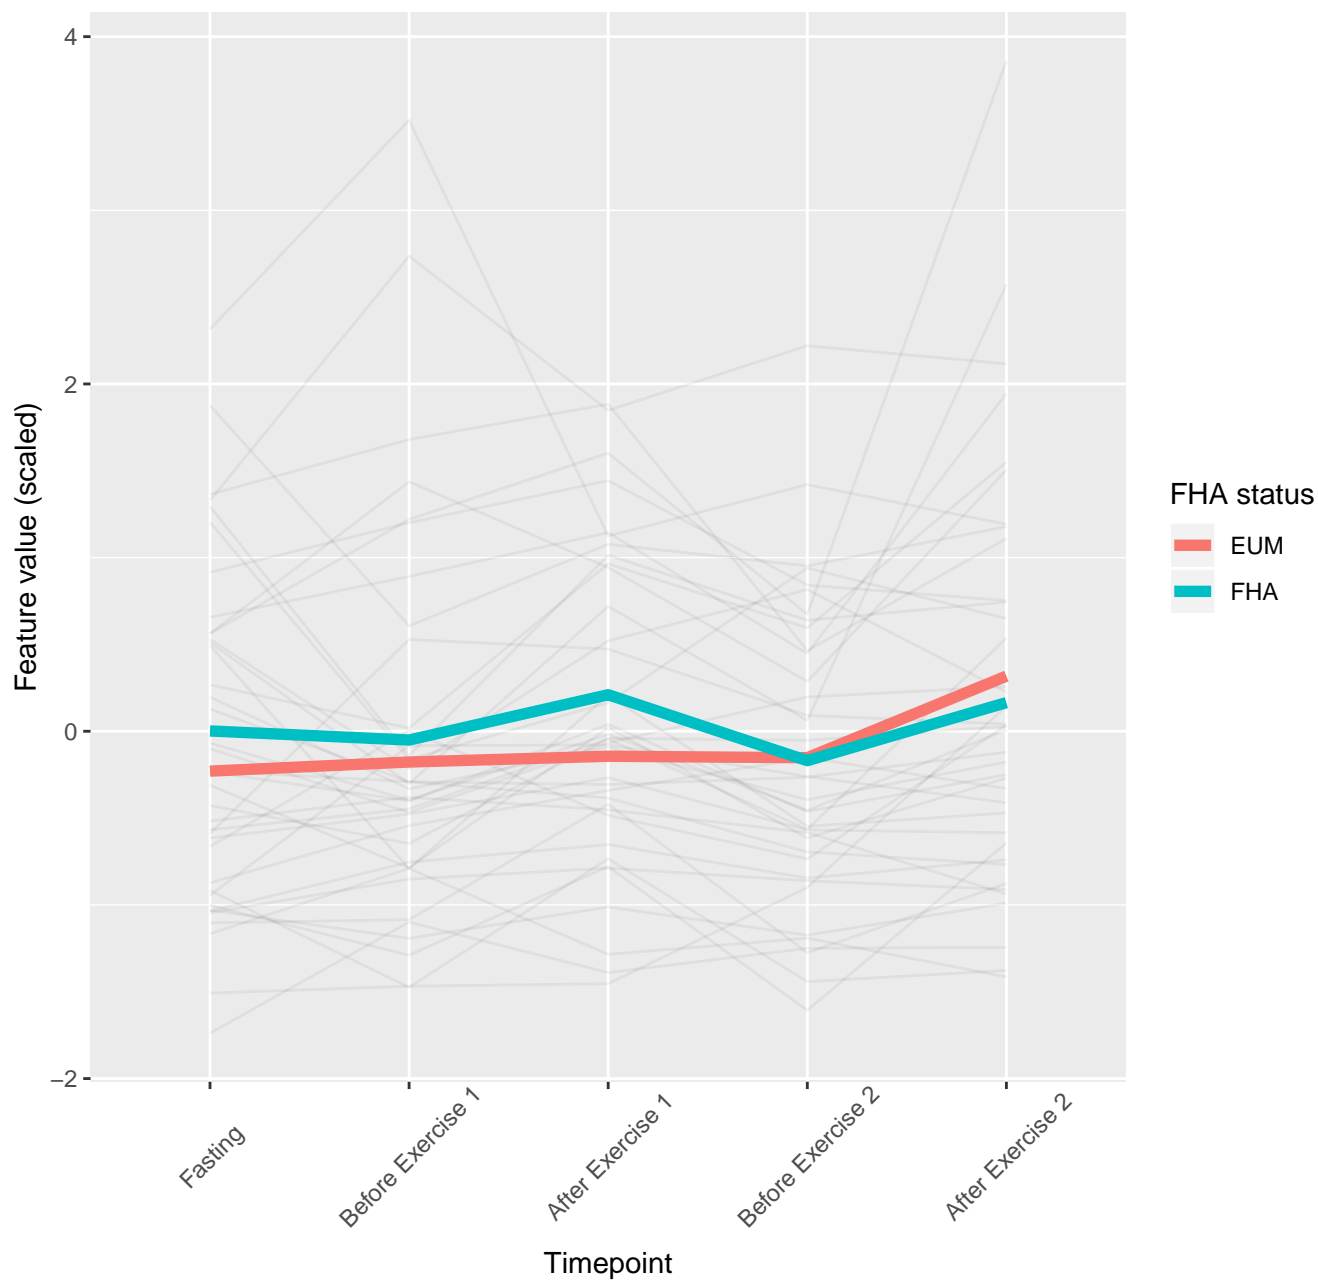

Line plot of PC(32:2)

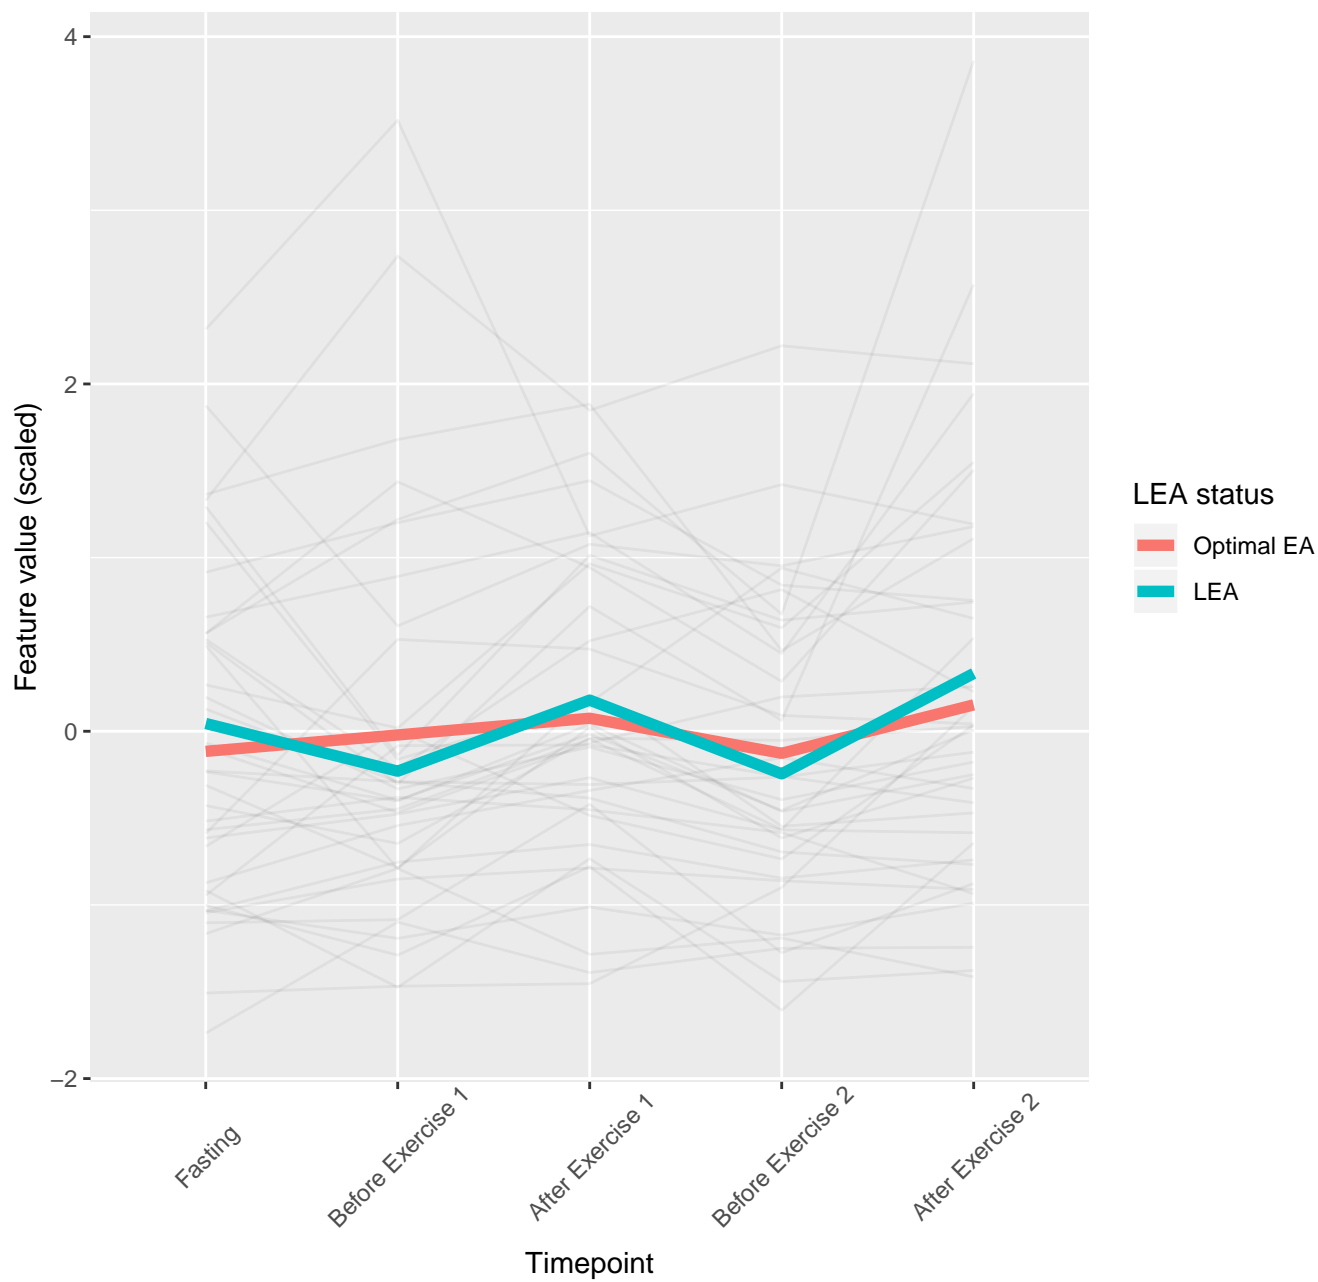

Line plot of PC(33:1)

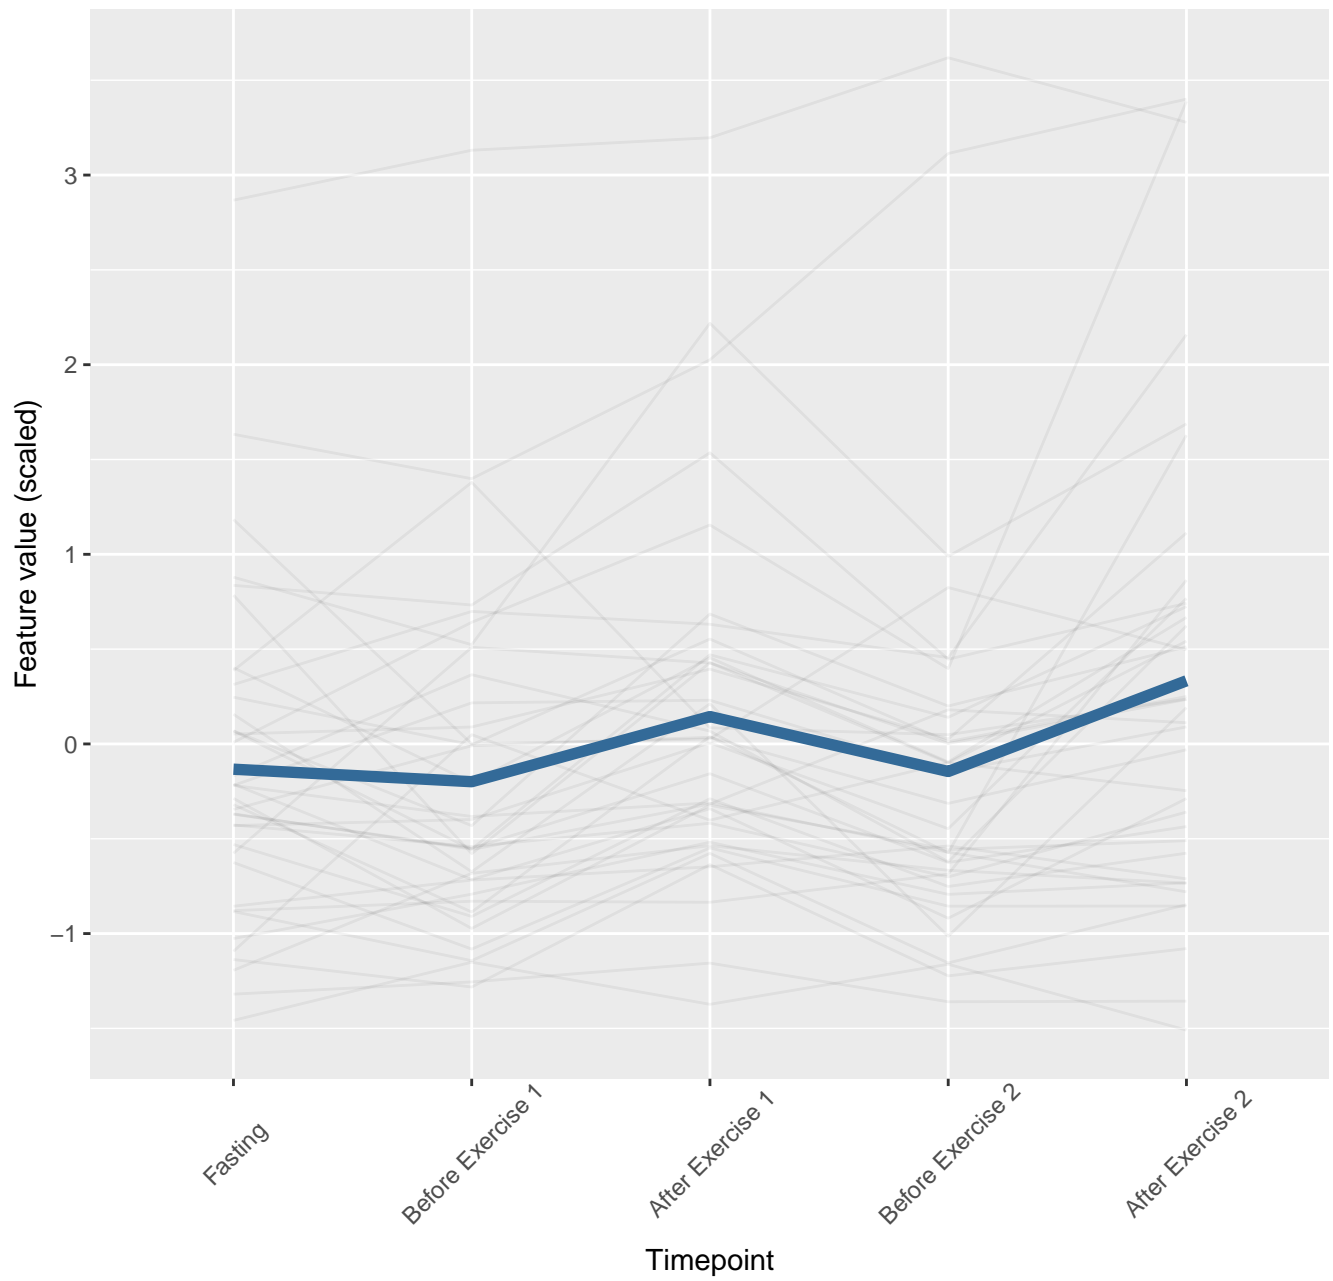

Line plot of PC(33:1)

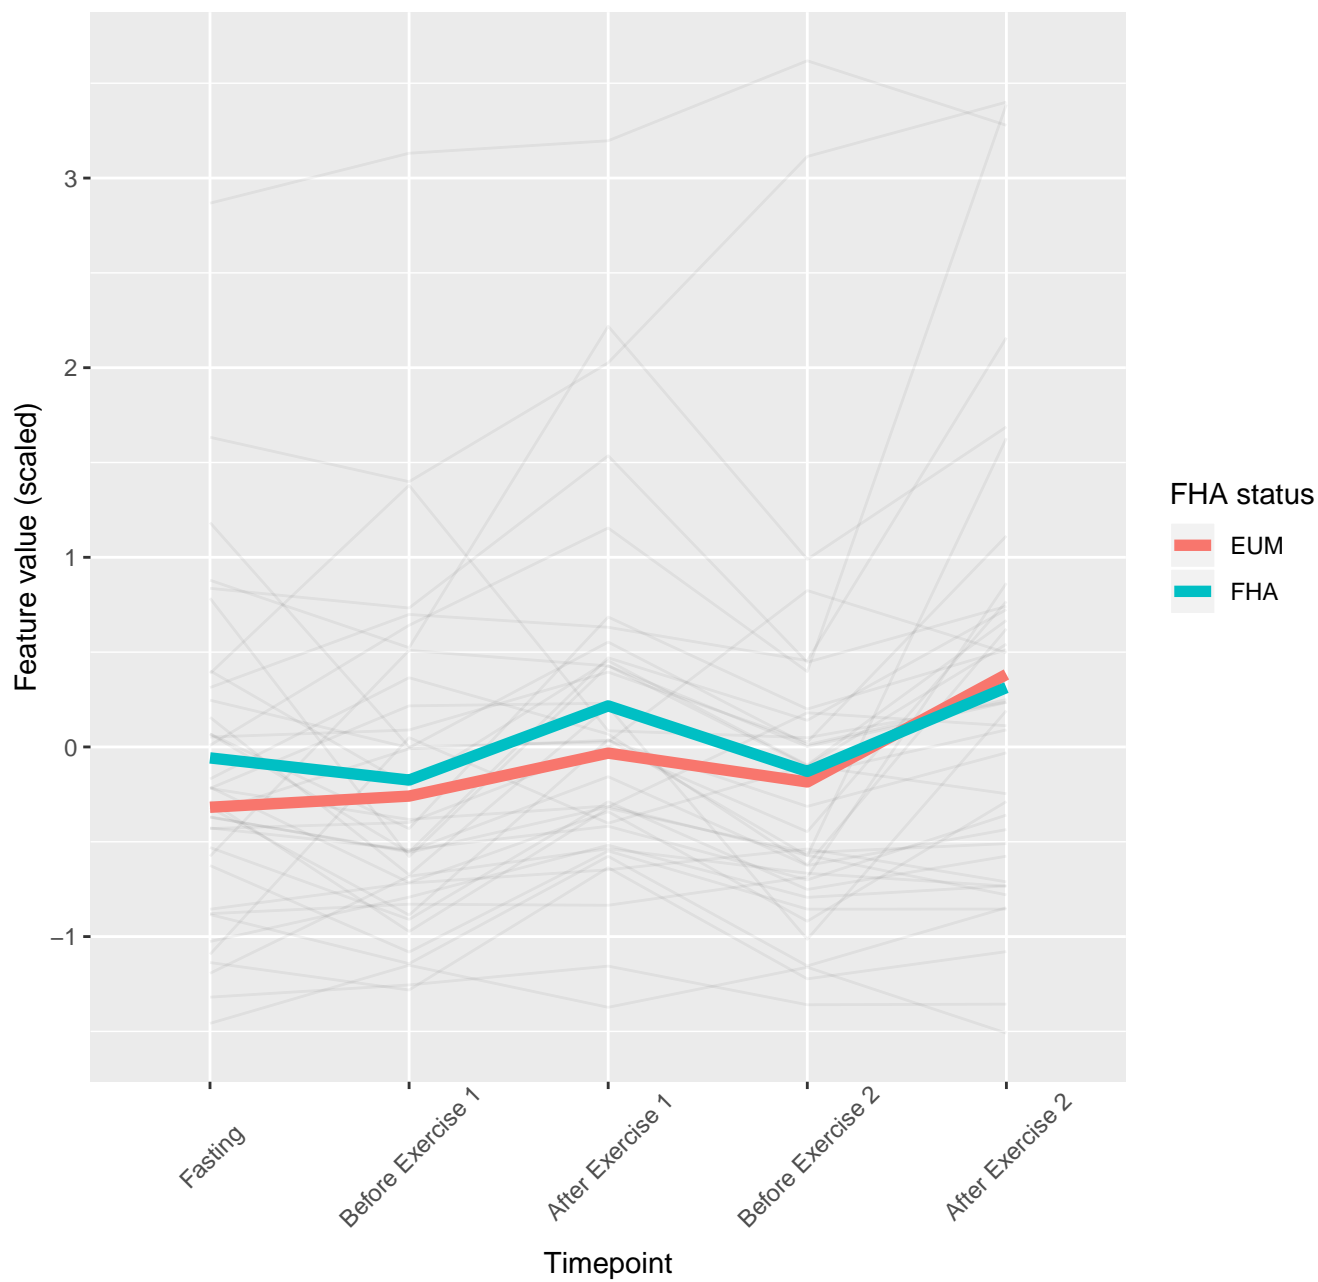

Line plot of PC(33:1)

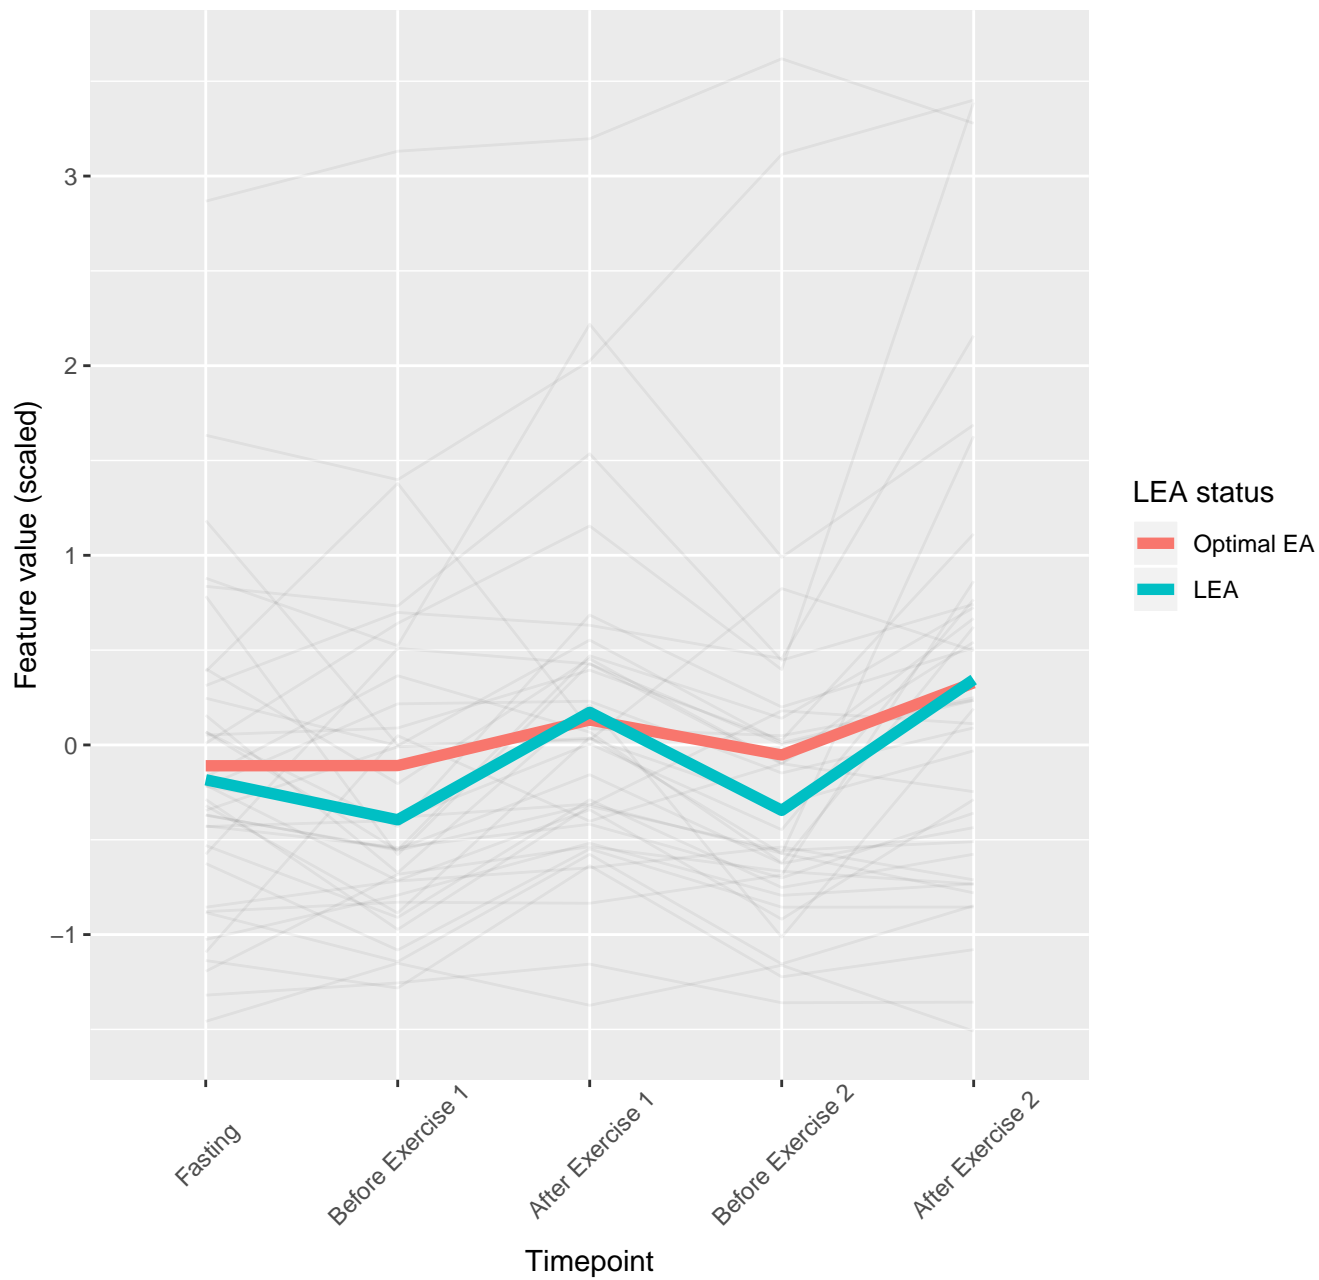

Line plot of PC(34:1)

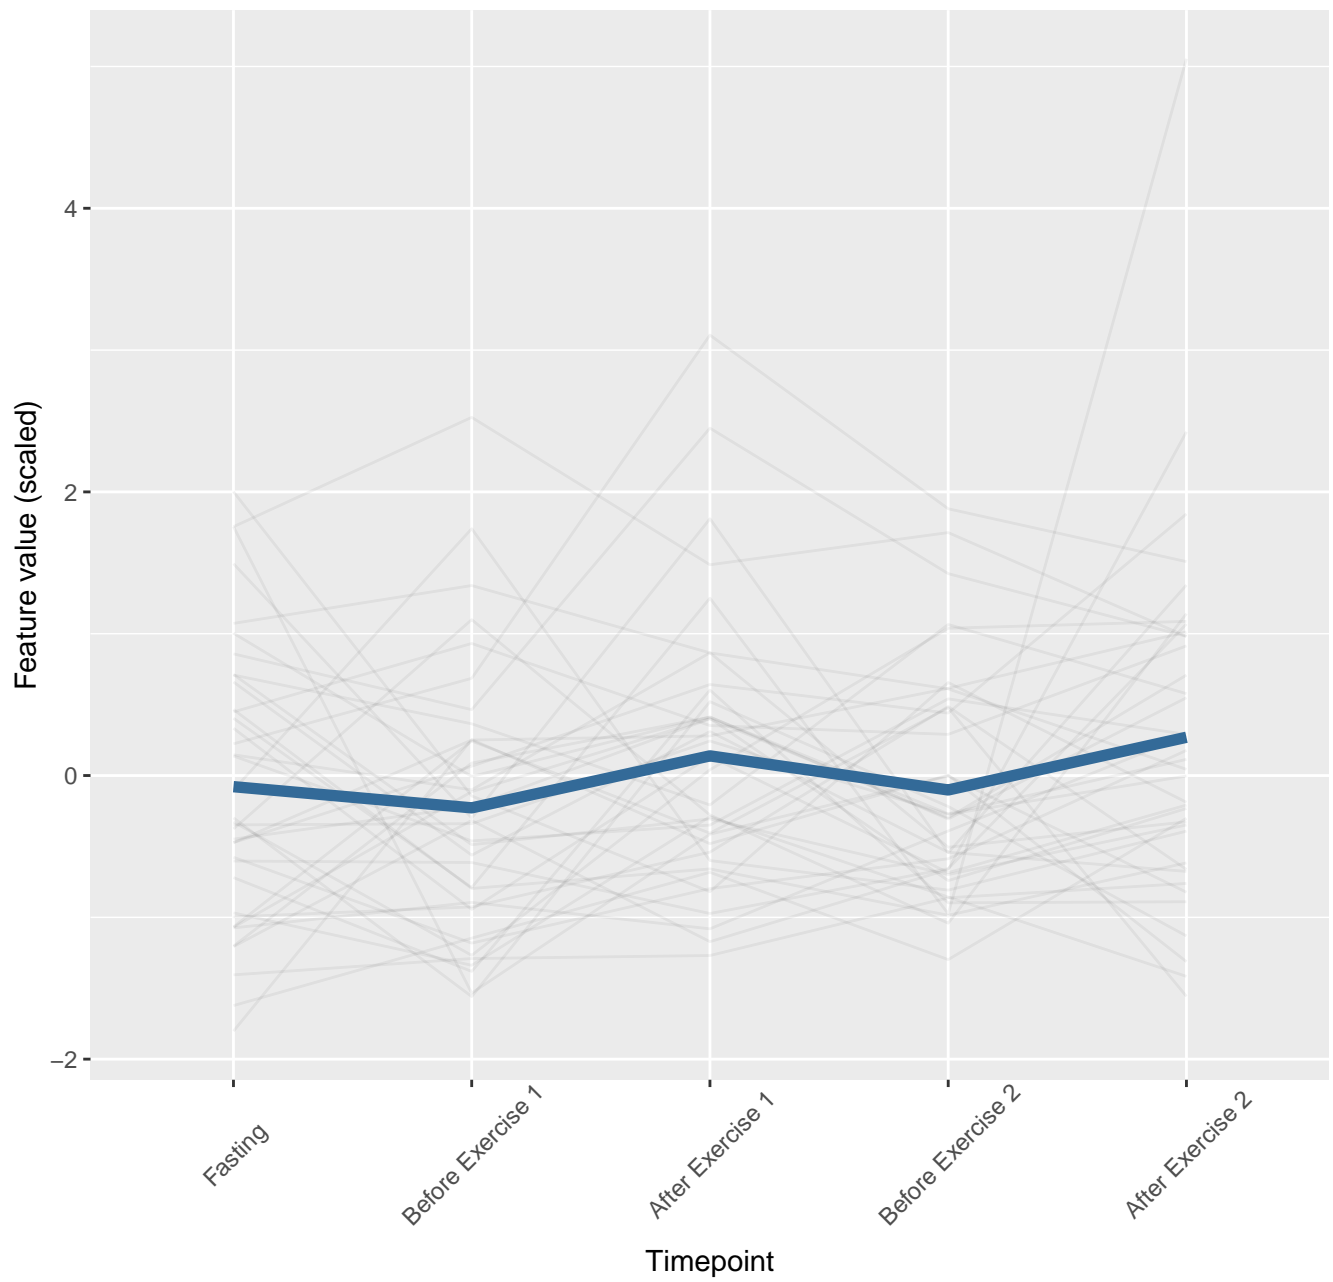

Line plot of PC(34:1)

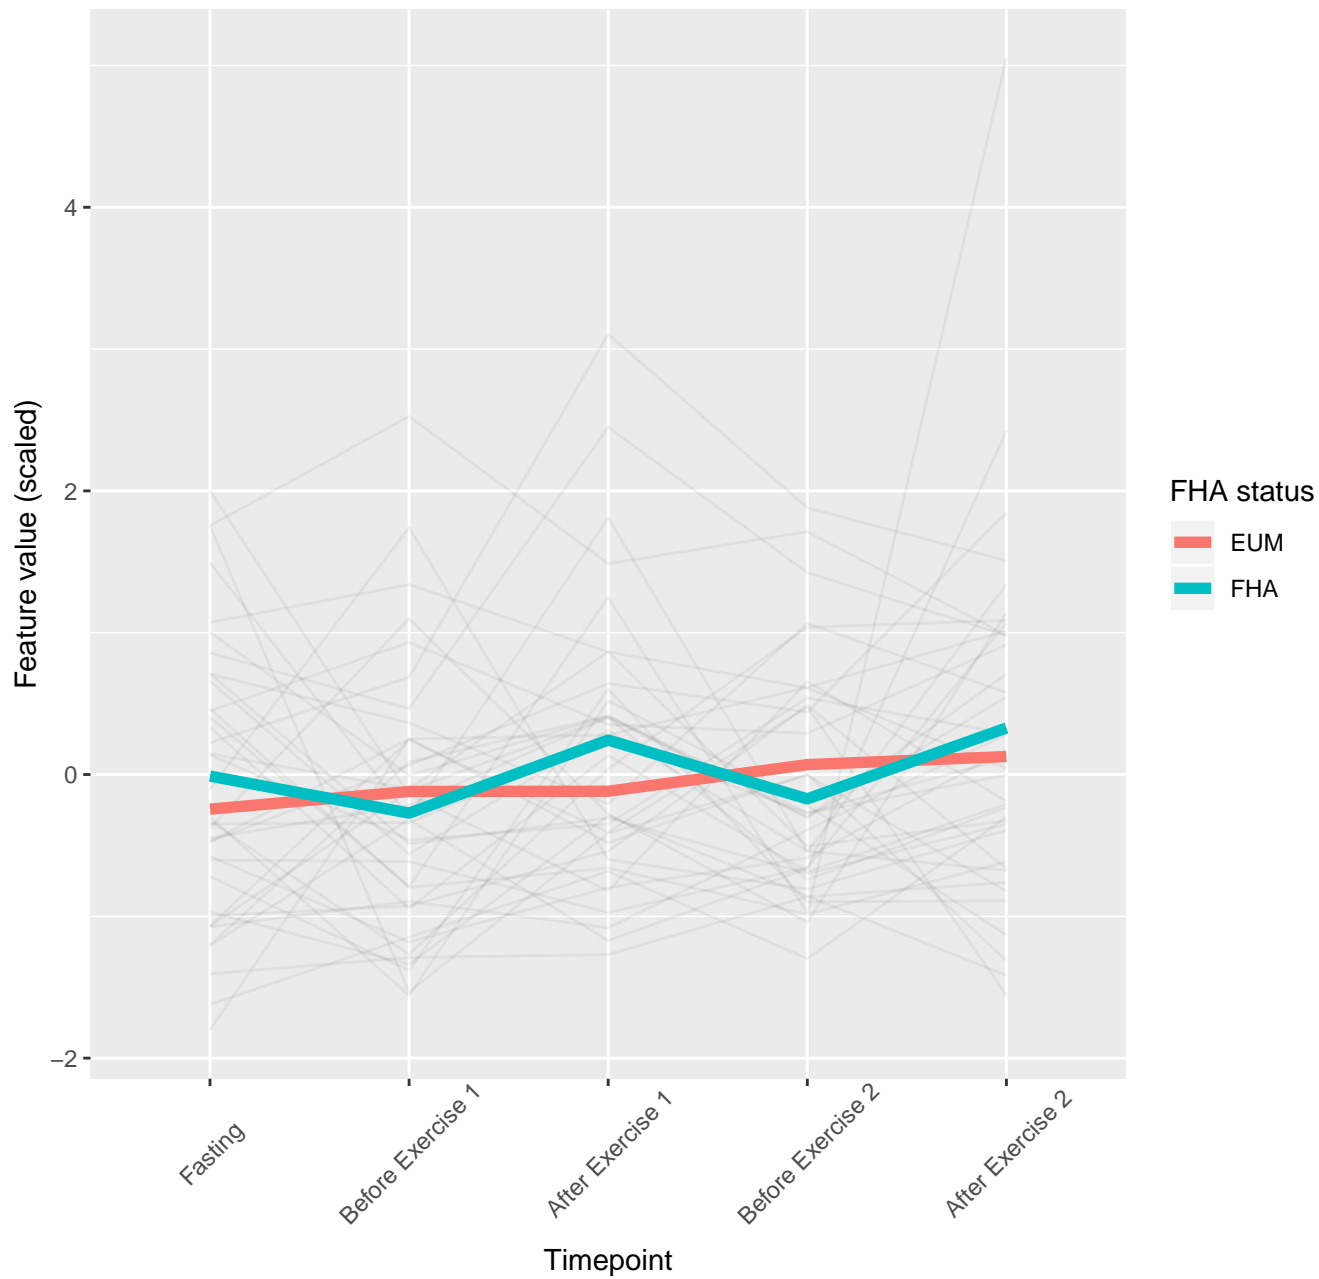



Line plot of PC(34:1)

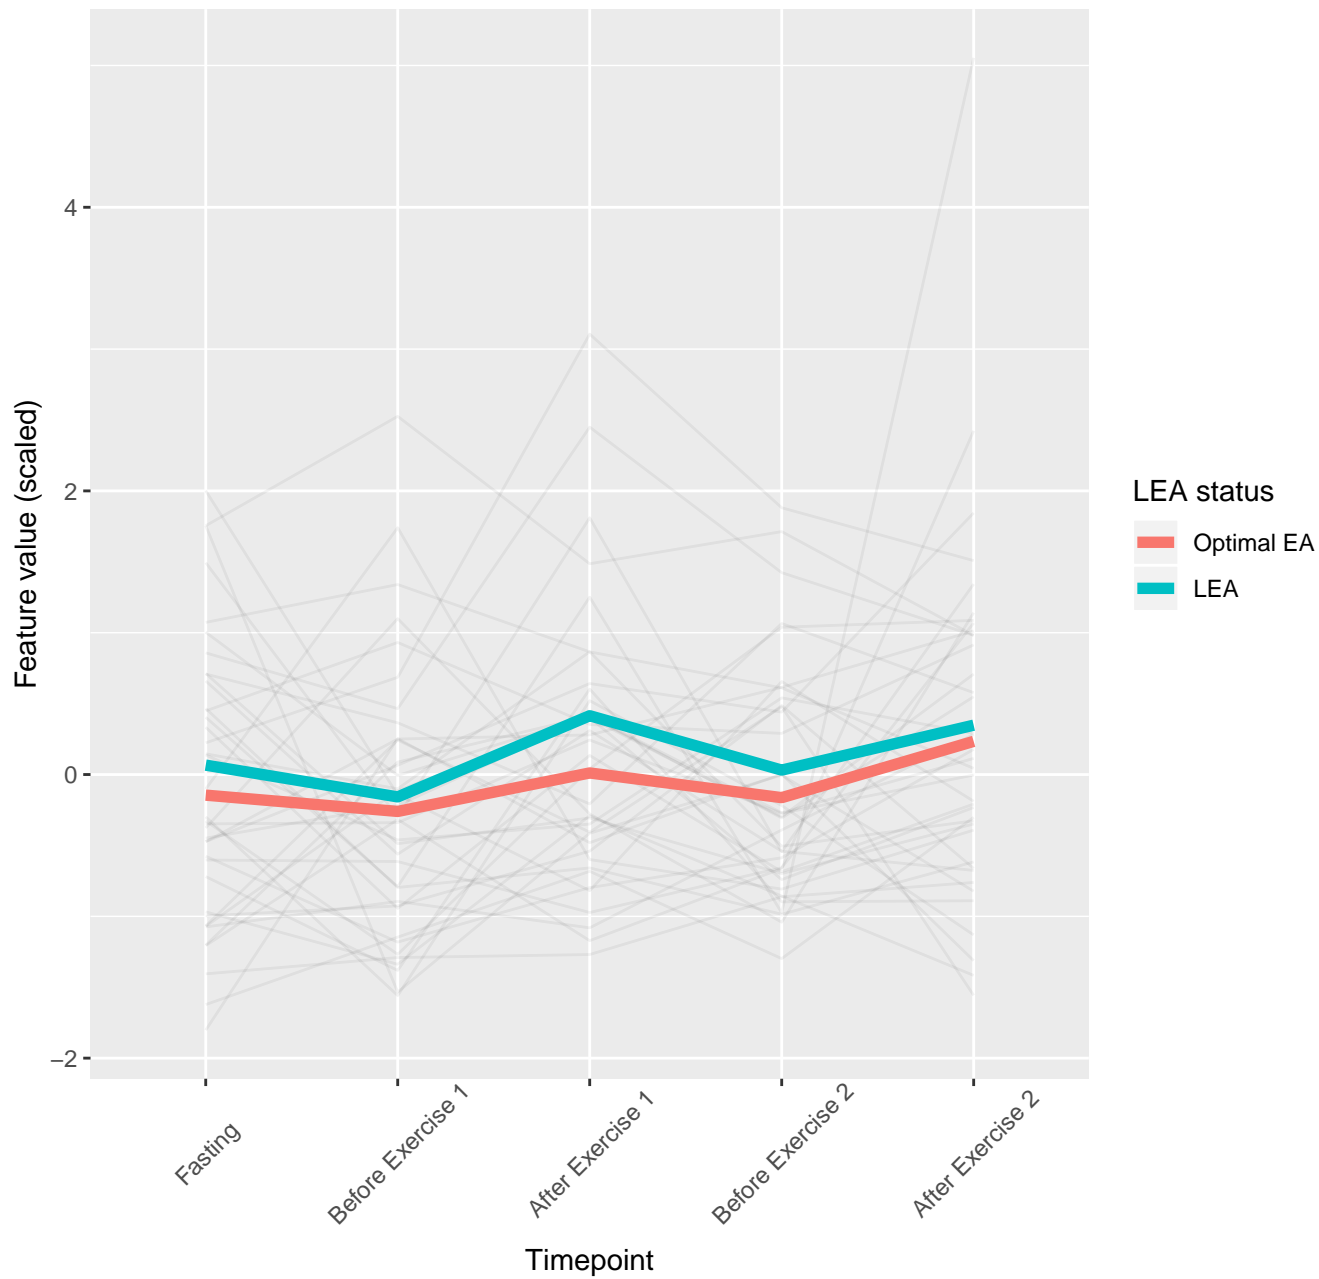

Line plot of PC(34:2)

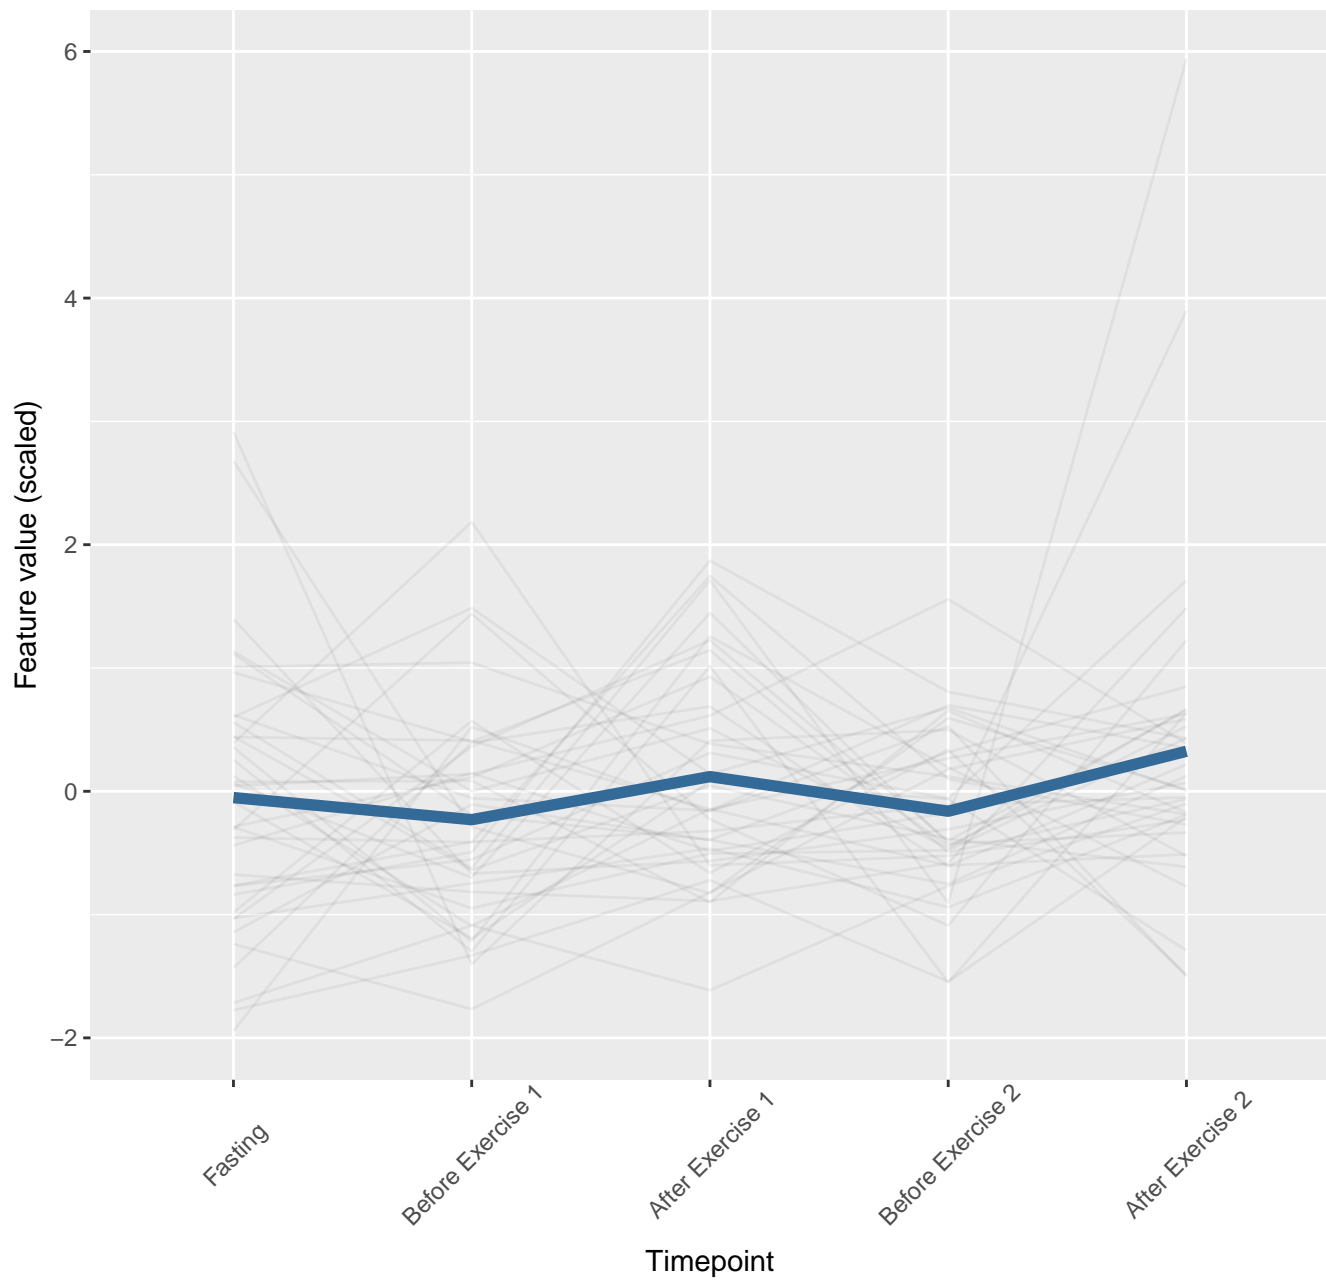

Line plot of PC(34:2)

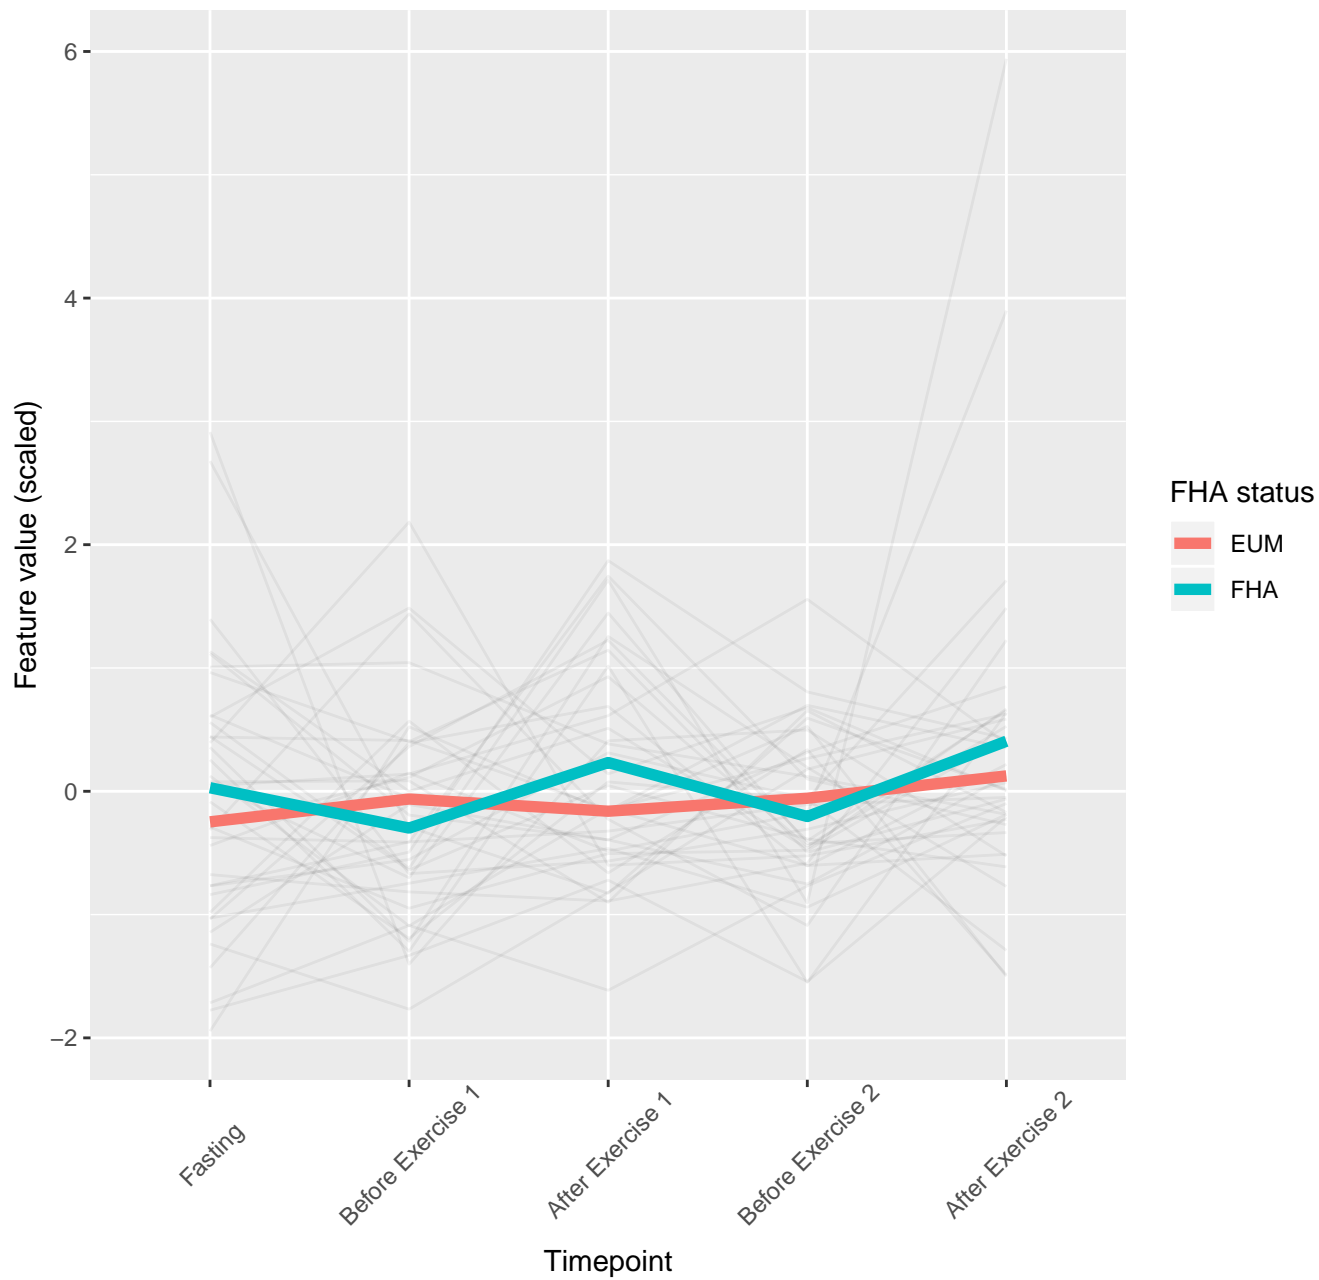

Line plot of PC(34:2)

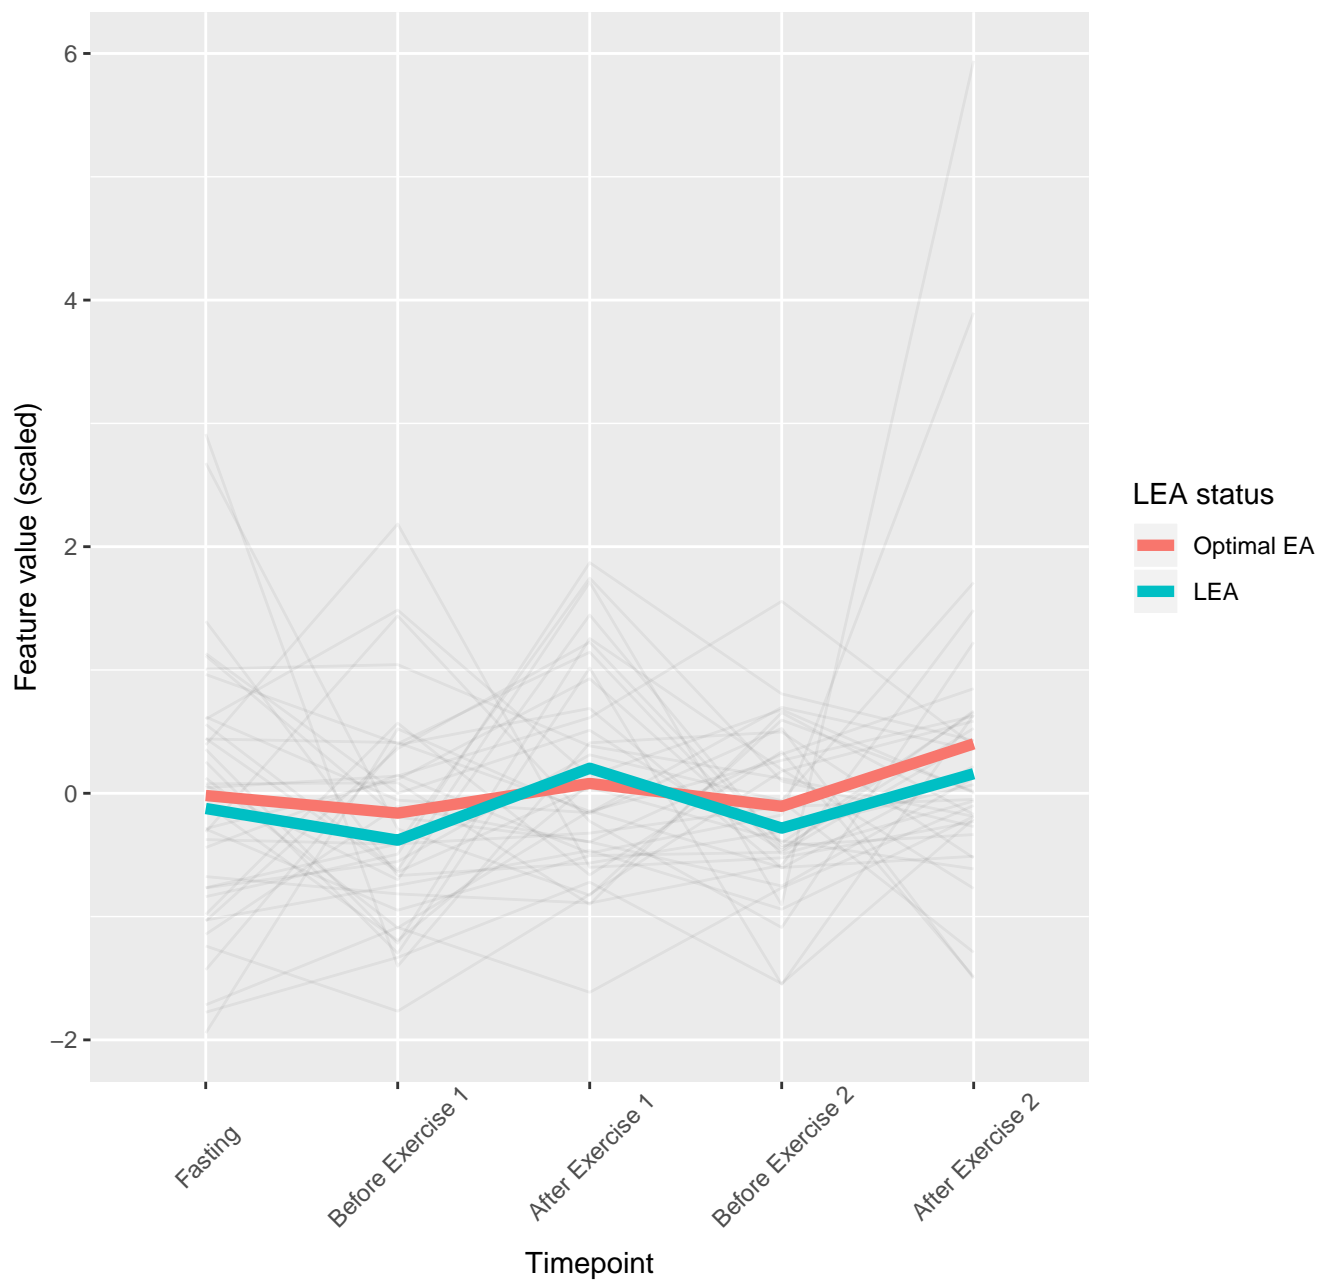

Line plot of PC(34:3)

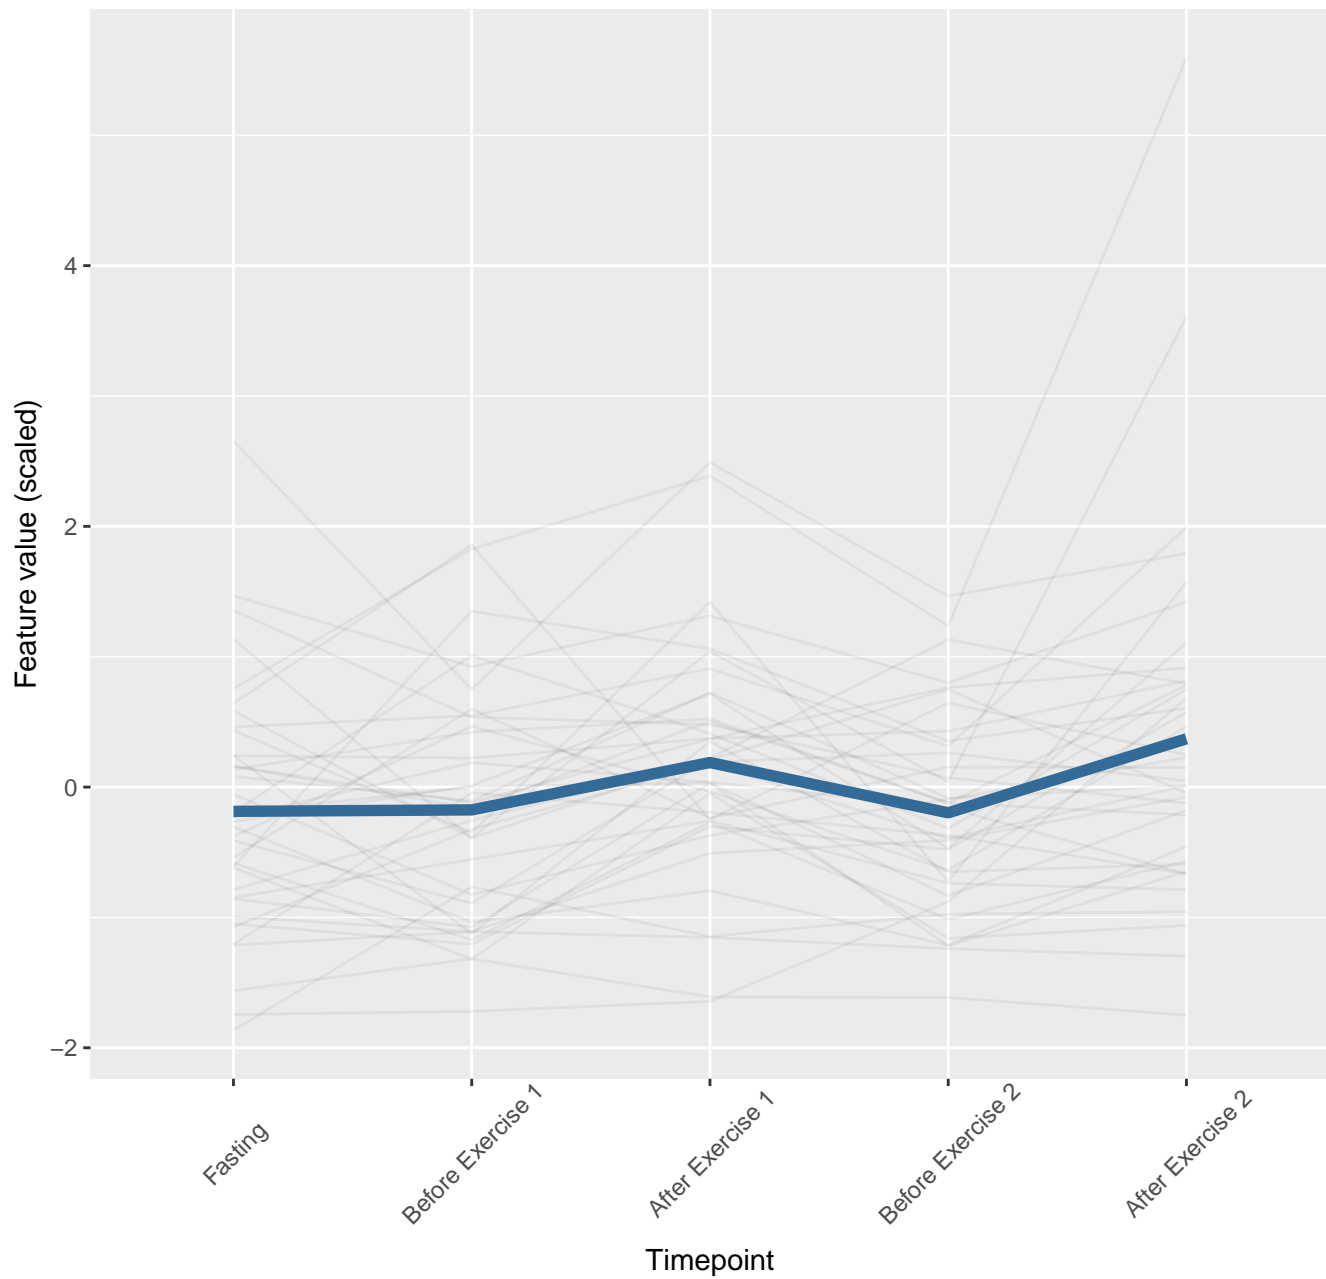

Line plot of PC(34:3)

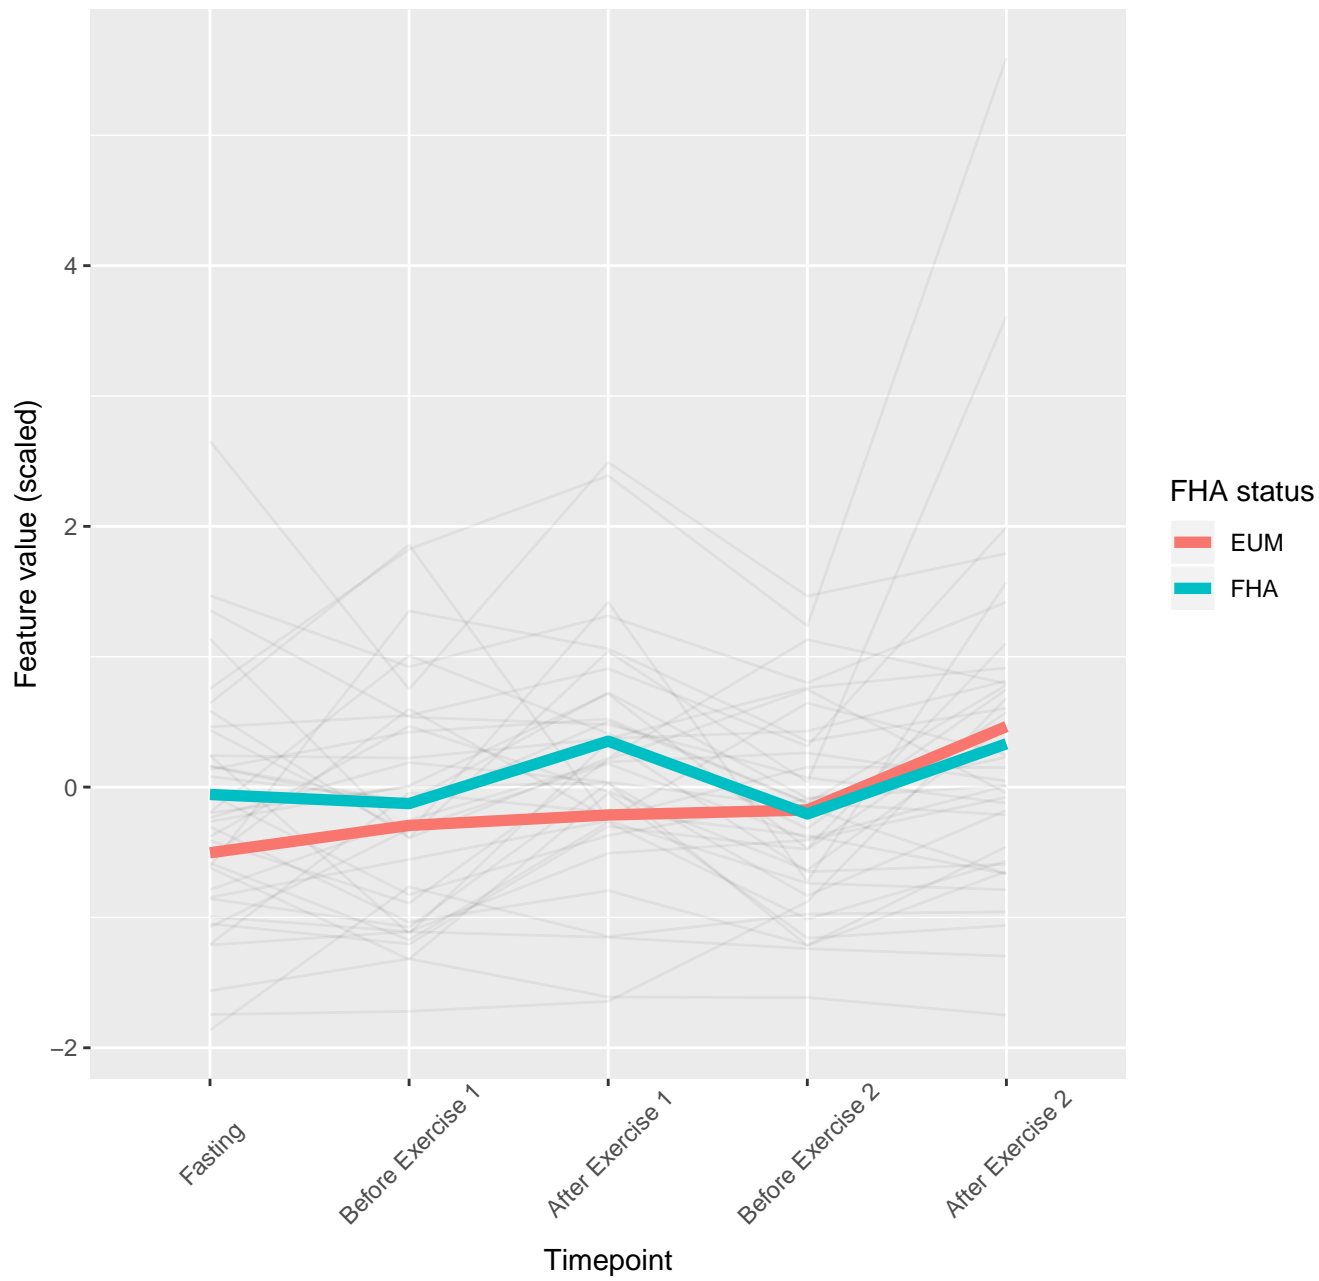

Line plot of PC(34:3)

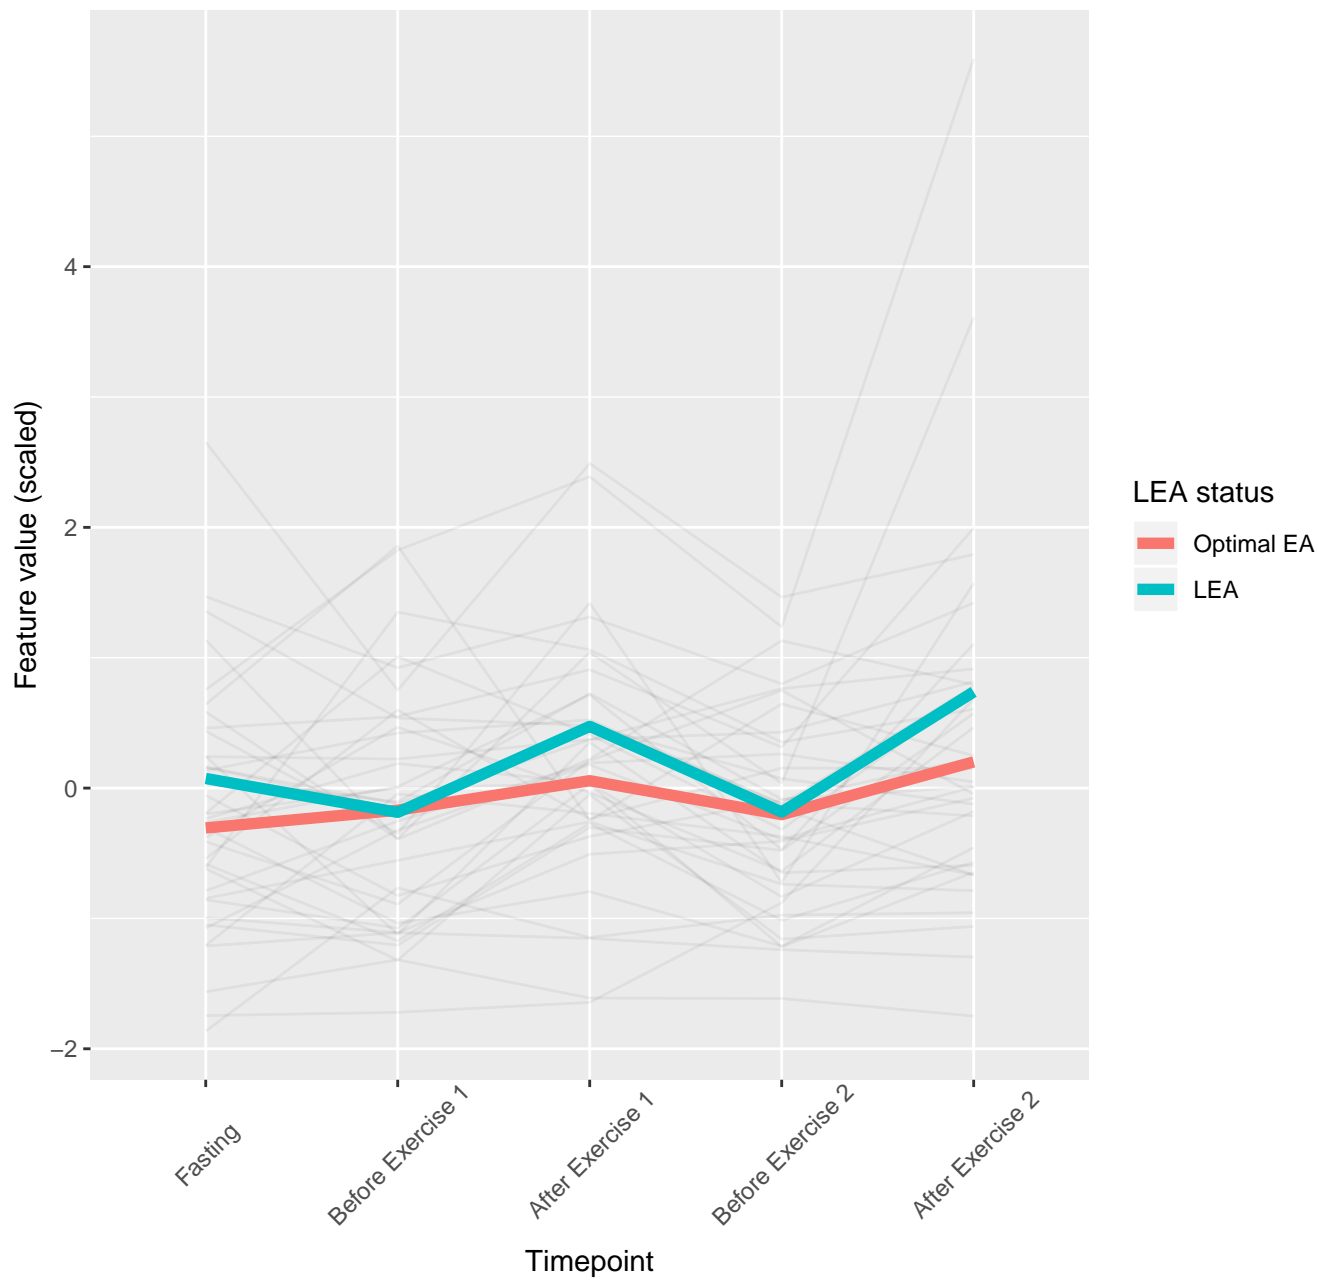

Line plot of PC(35:1)

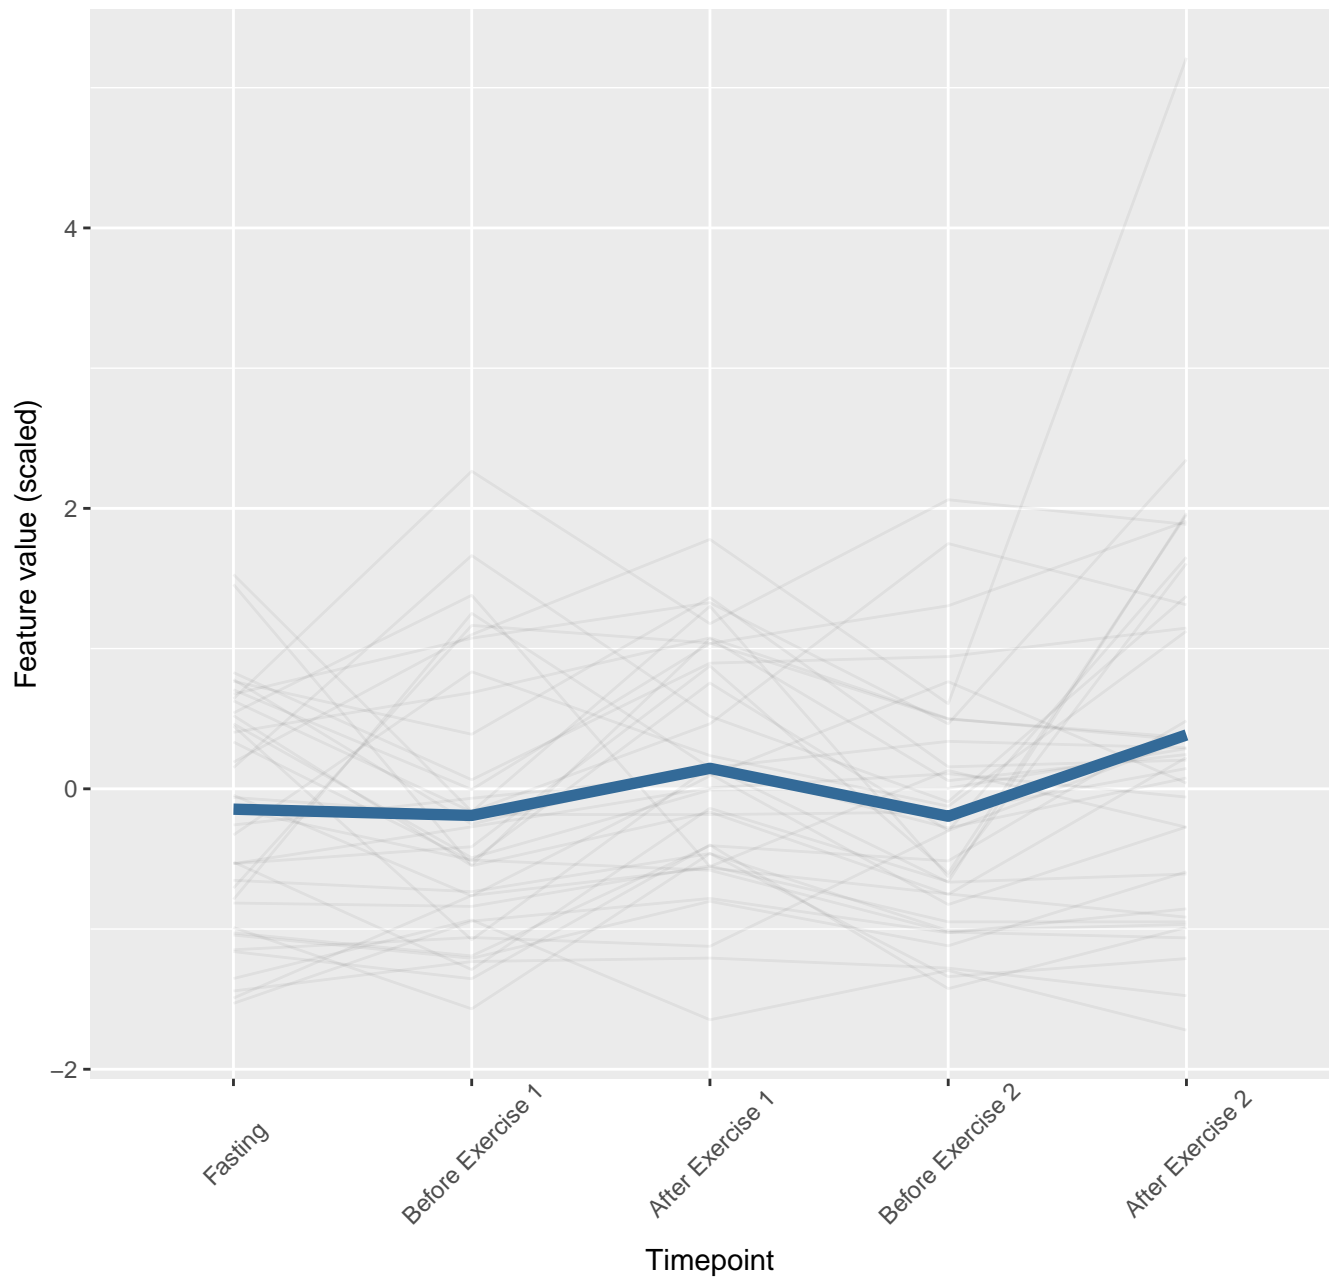



Line plot of PC(35:1)

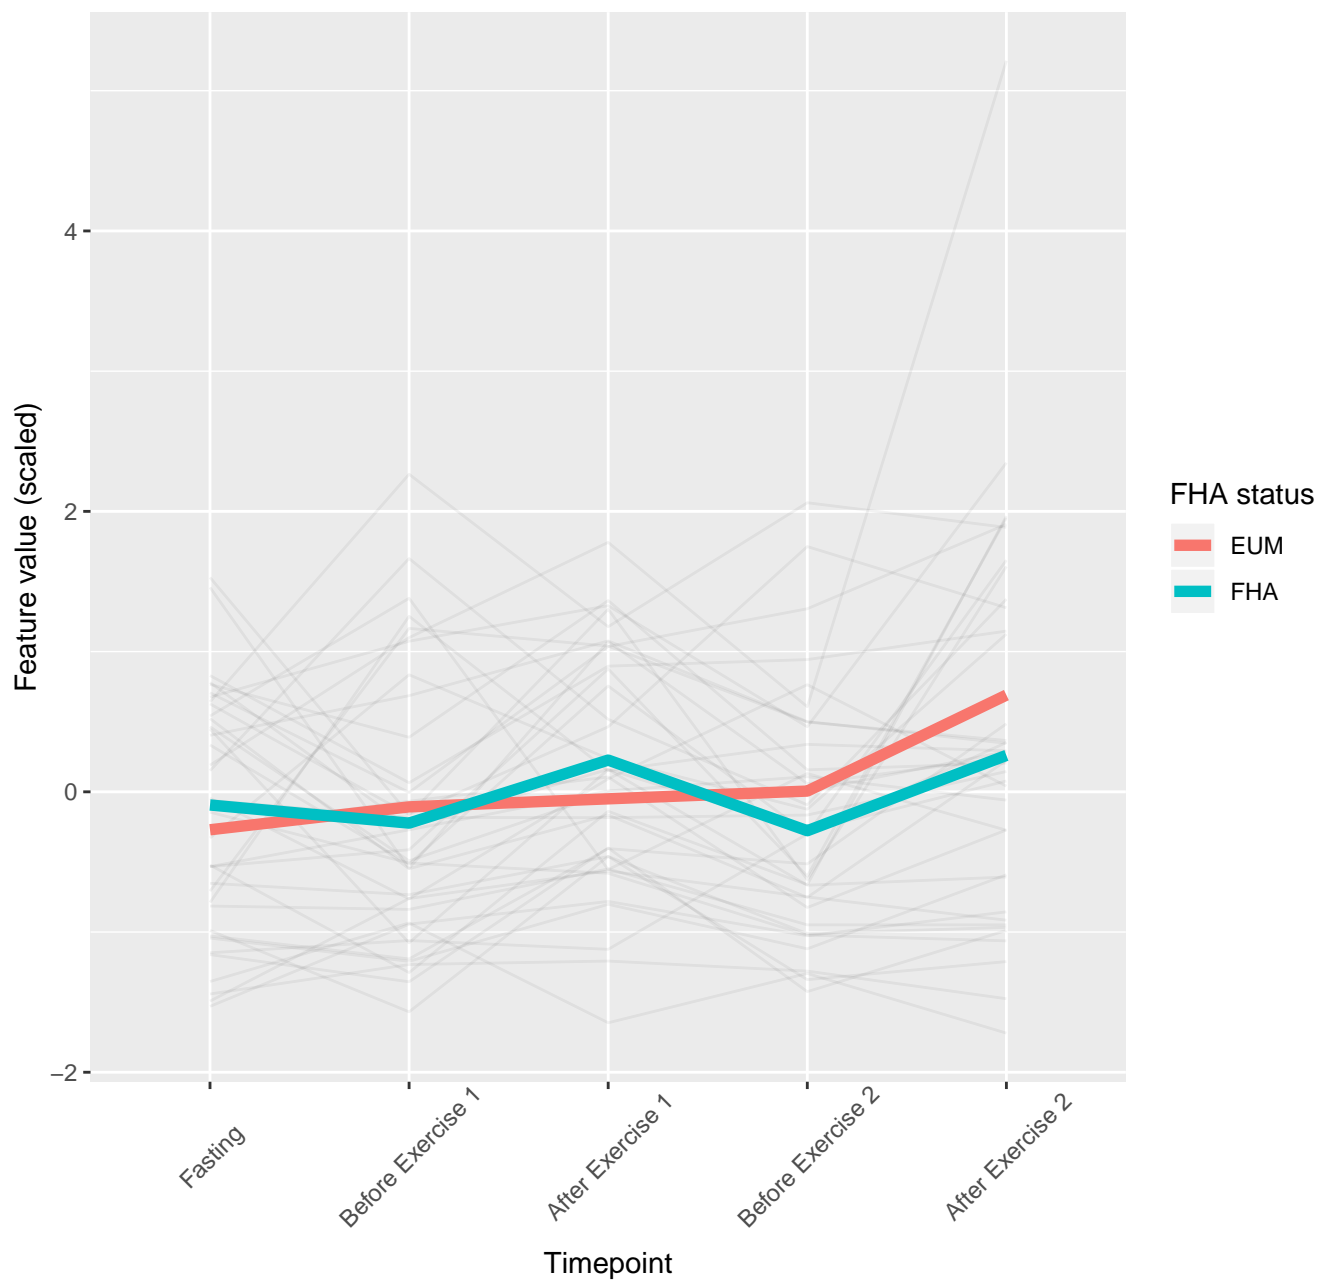

Line plot of PC(35:1)

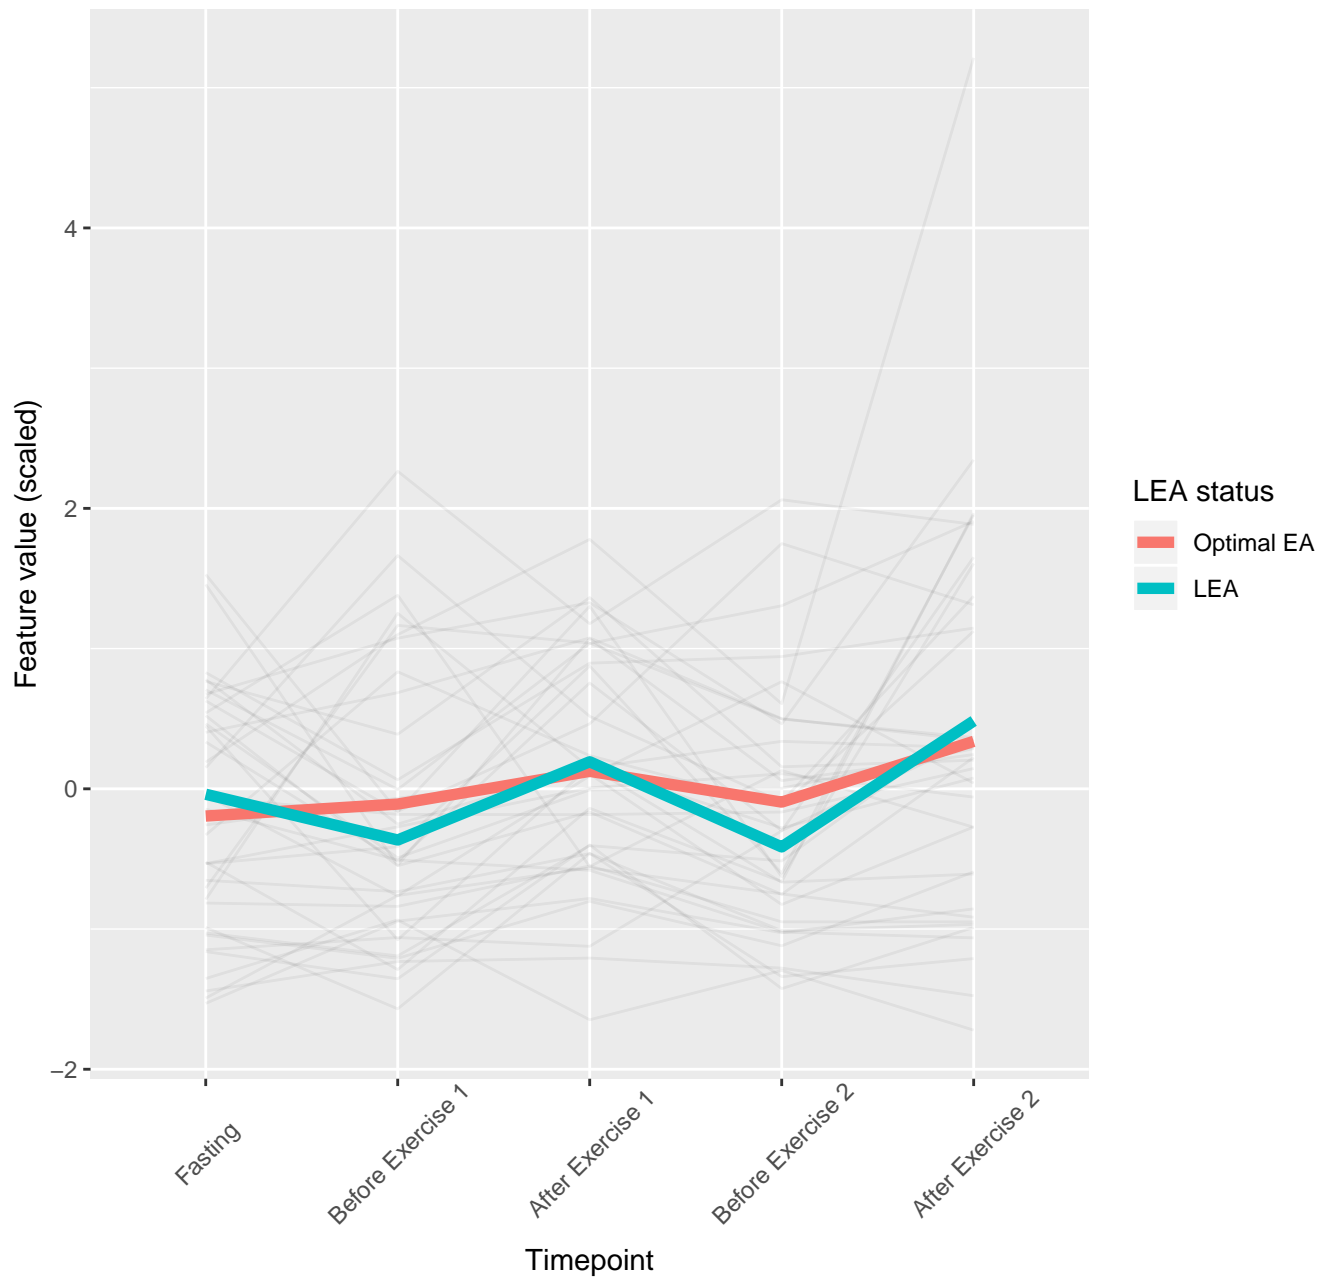

Line plot of PC(35:2)

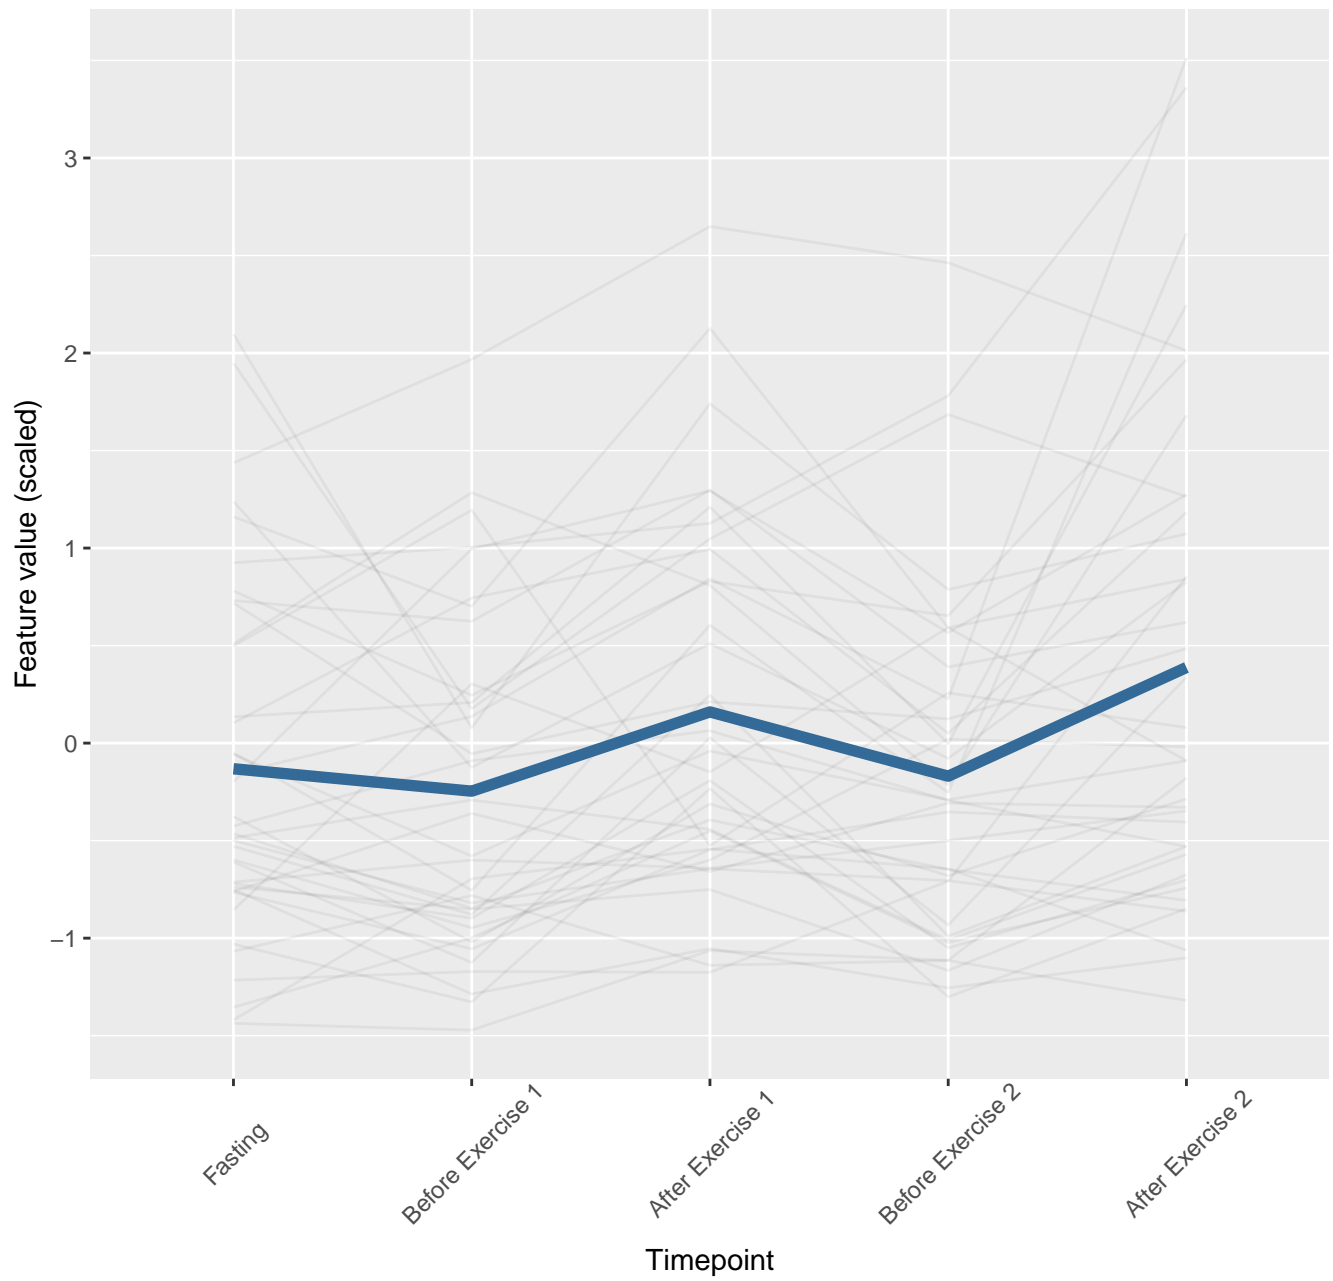

Line plot of PC(35:2)

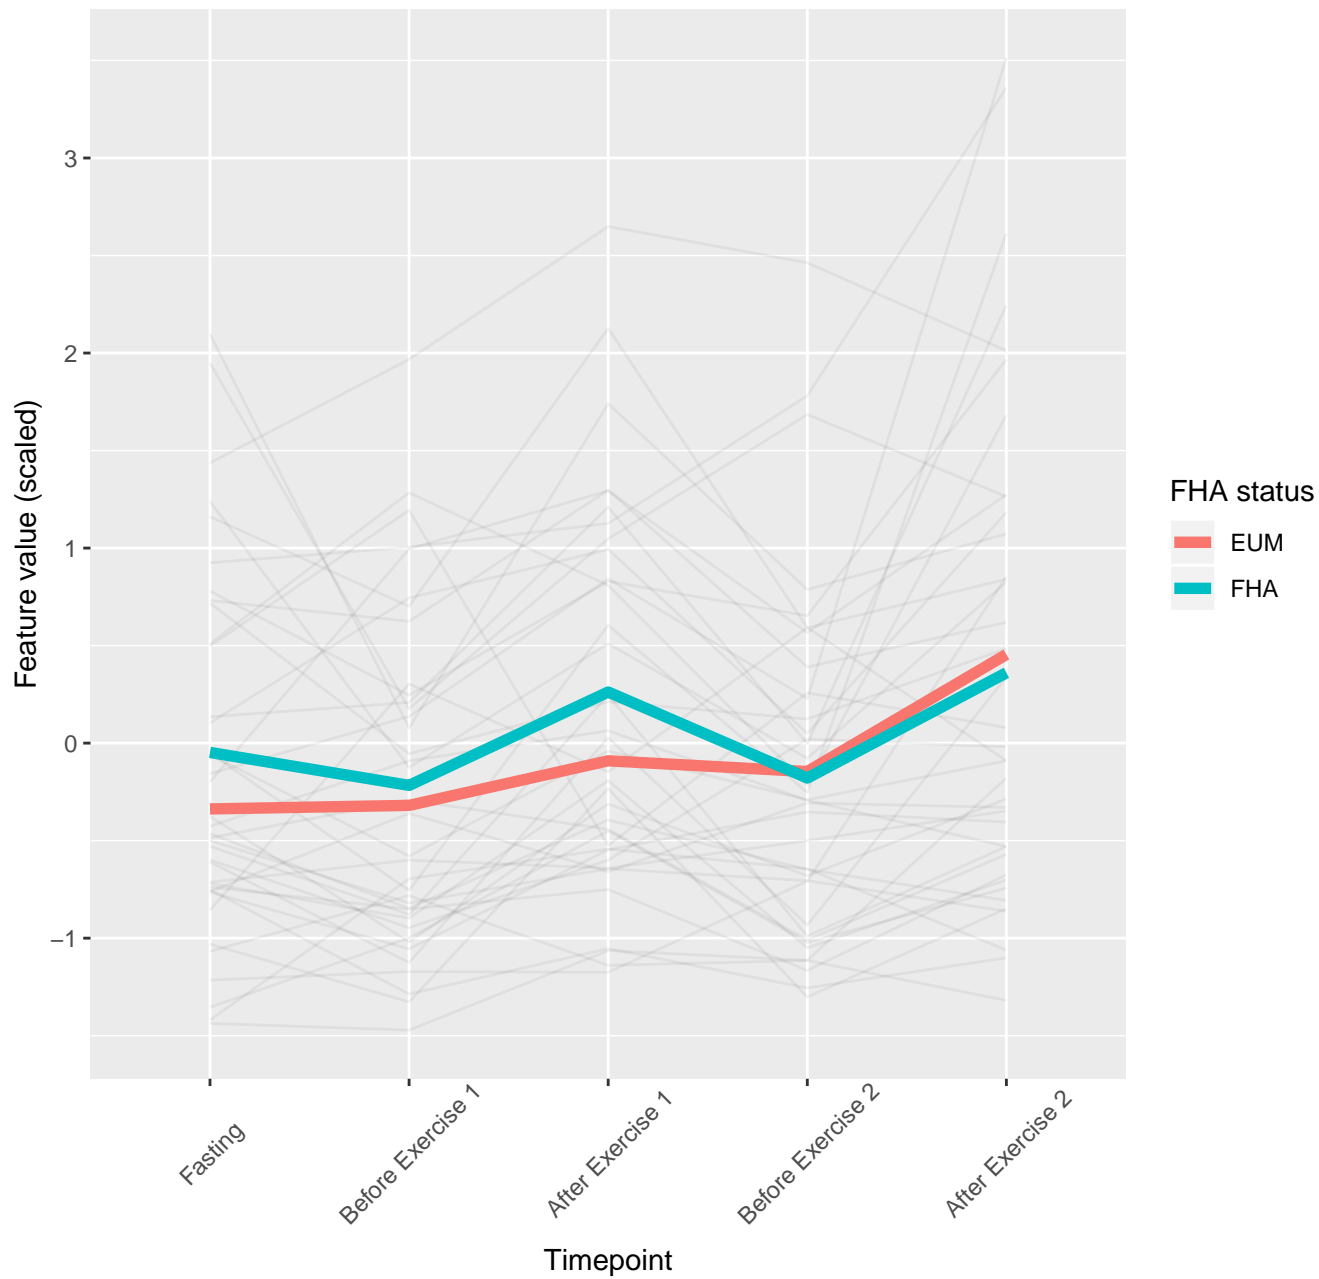

Line plot of PC(35:2)

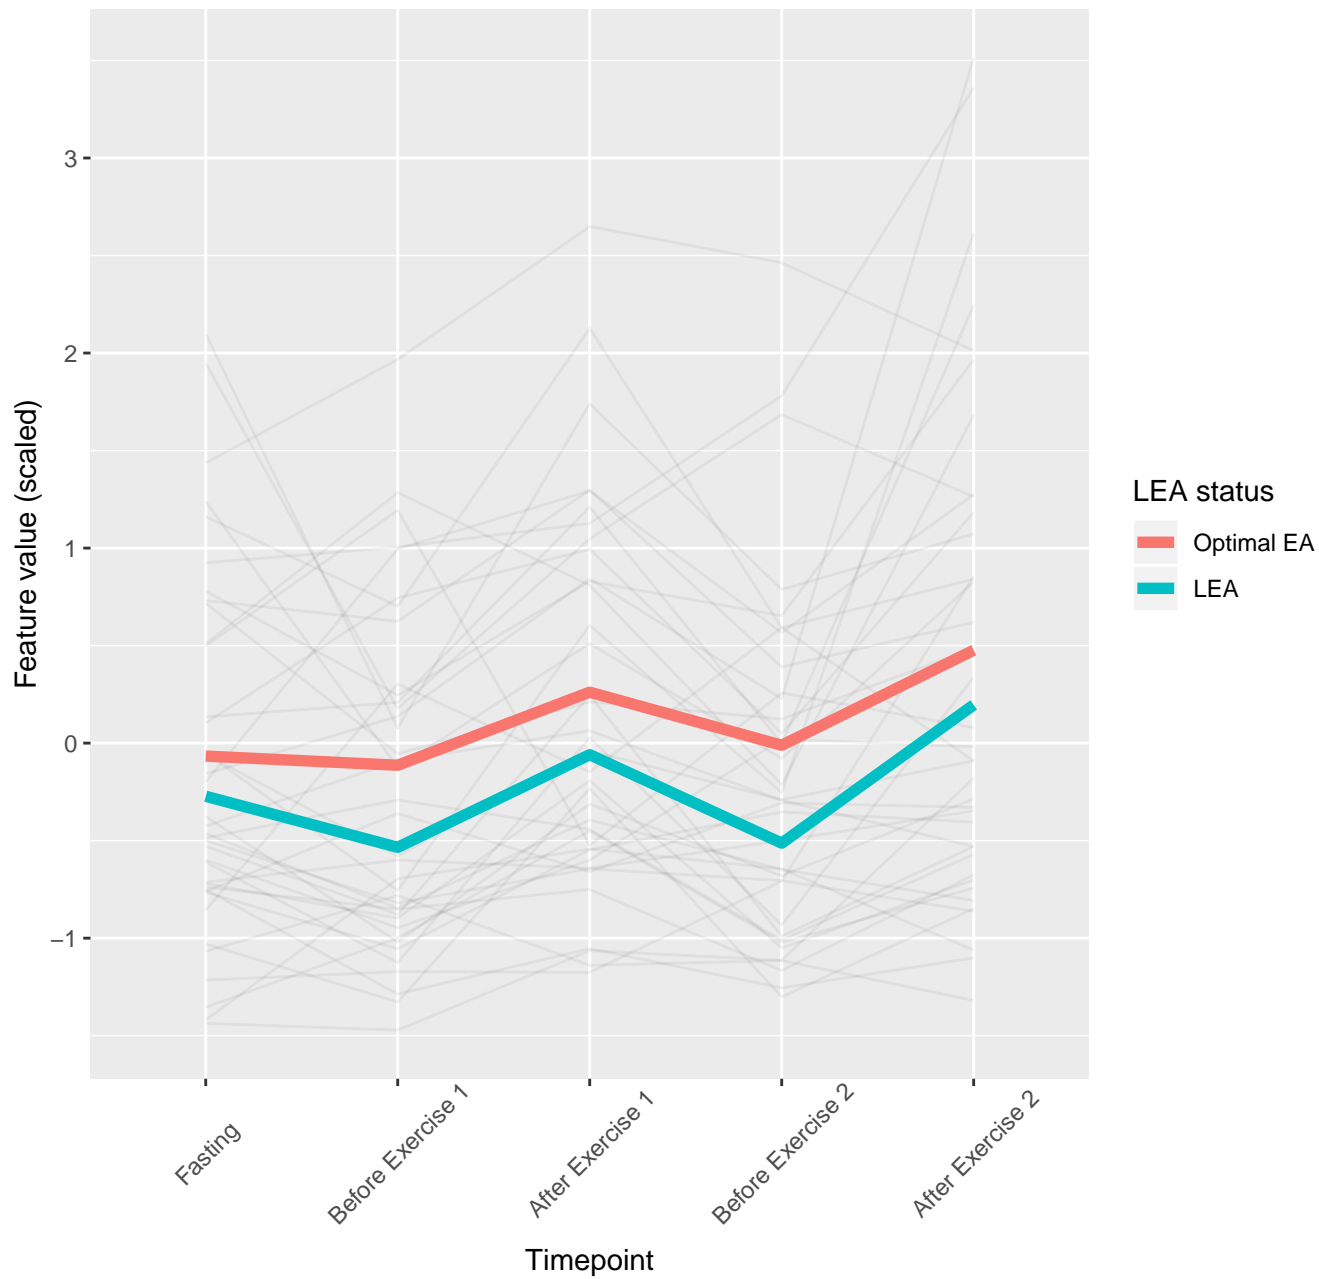

Line plot of PC(35:3)

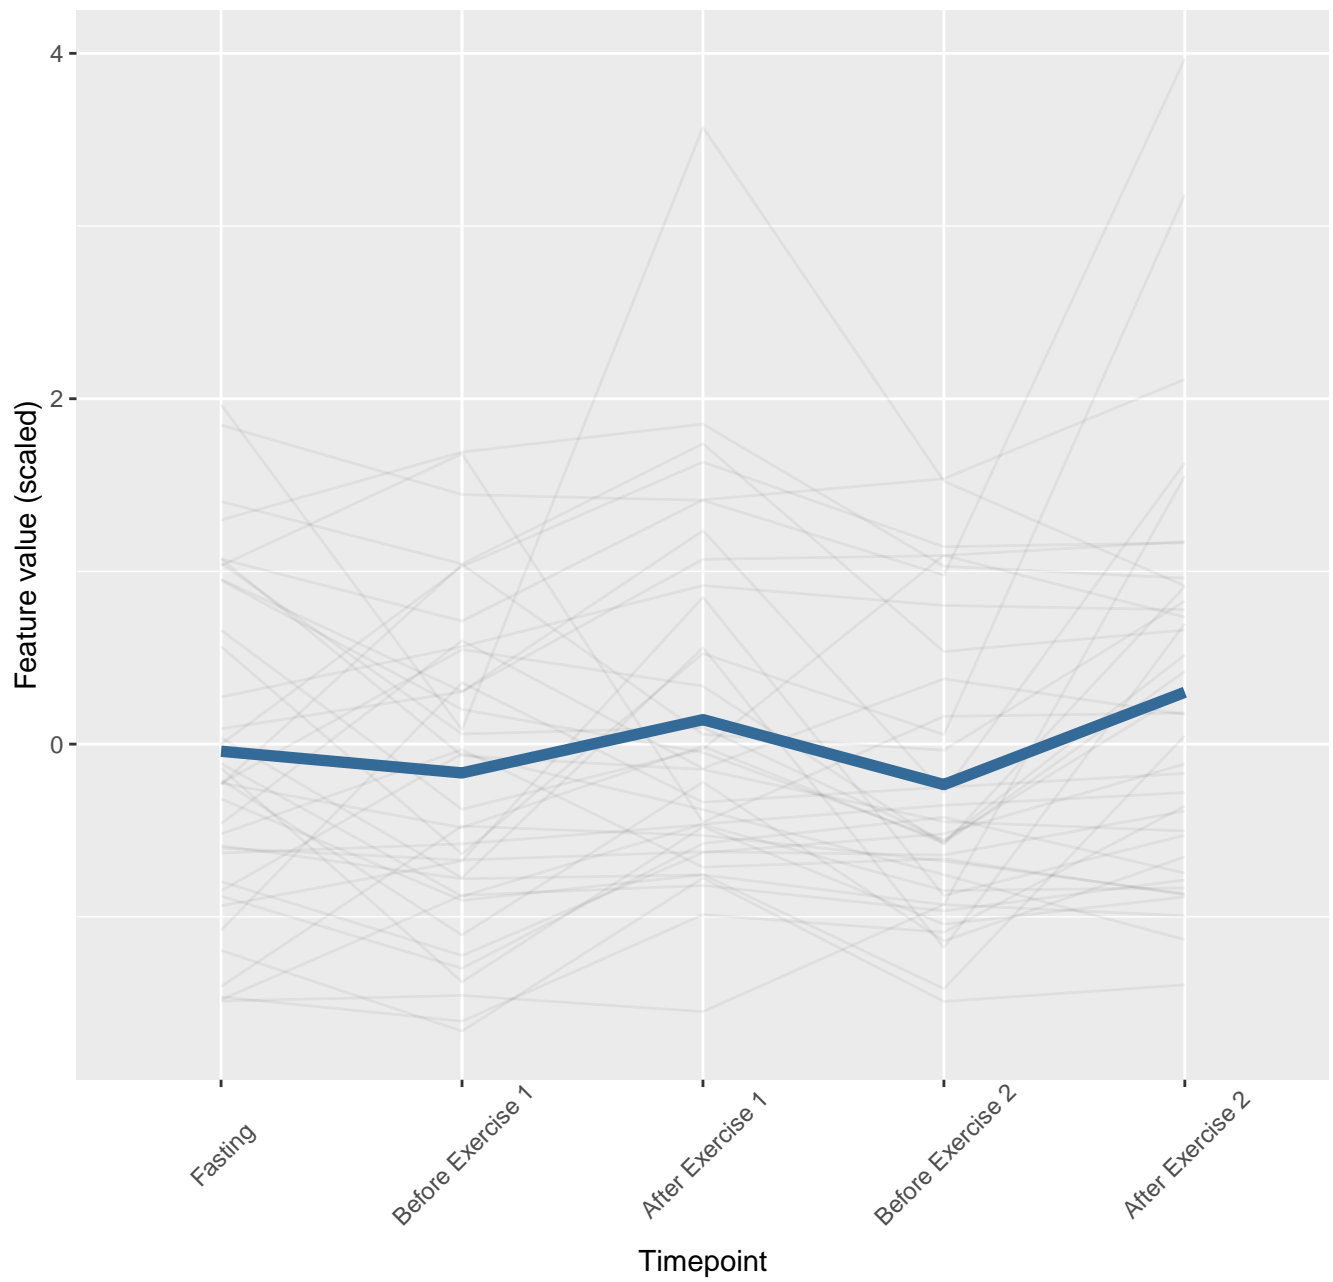

Line plot of PC(35:3)

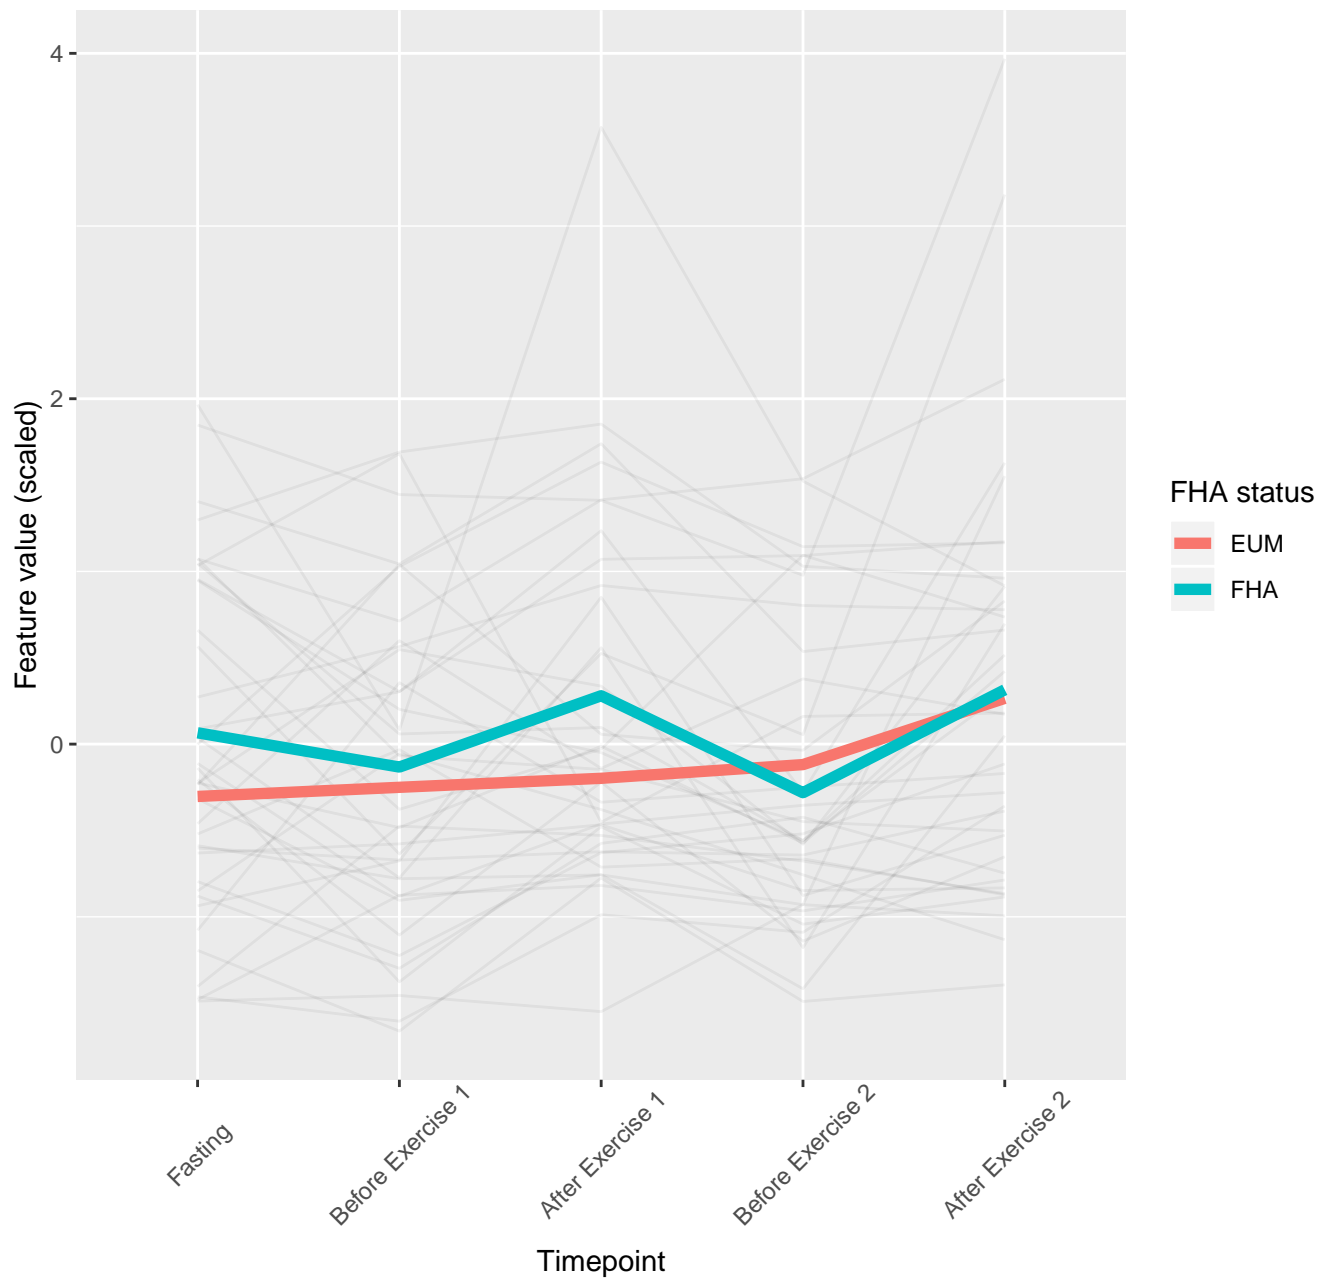

Line plot of PC(35:3)

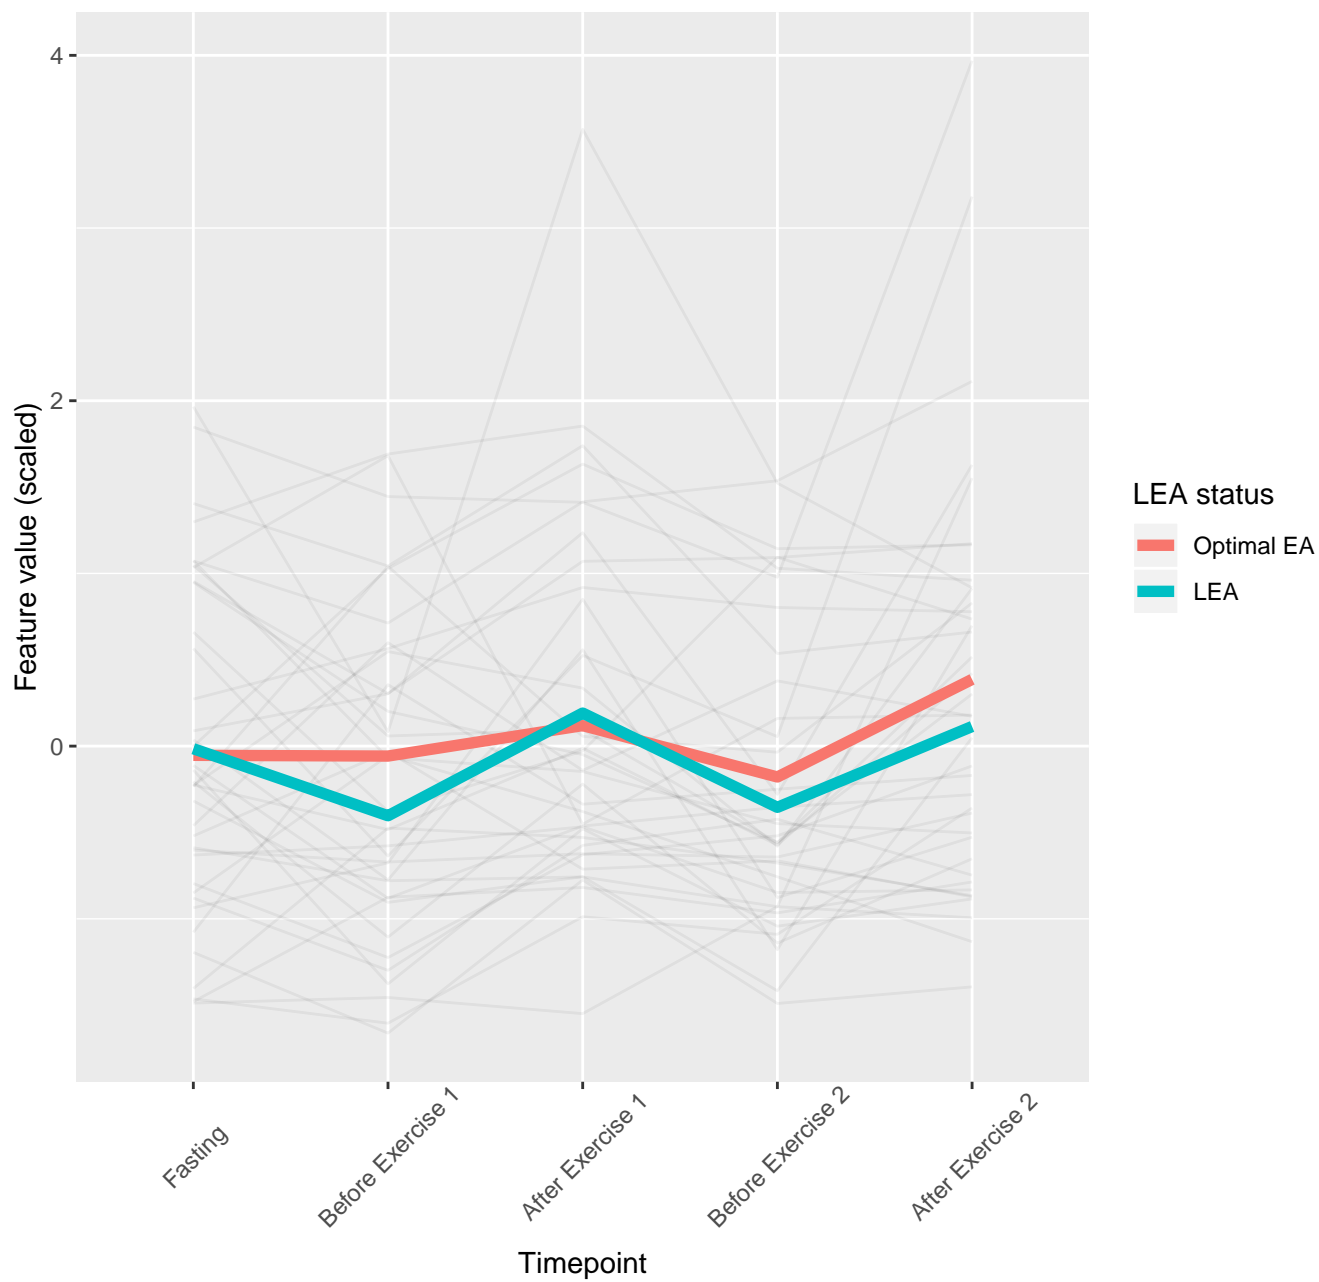



Line plot of PC(35:4)

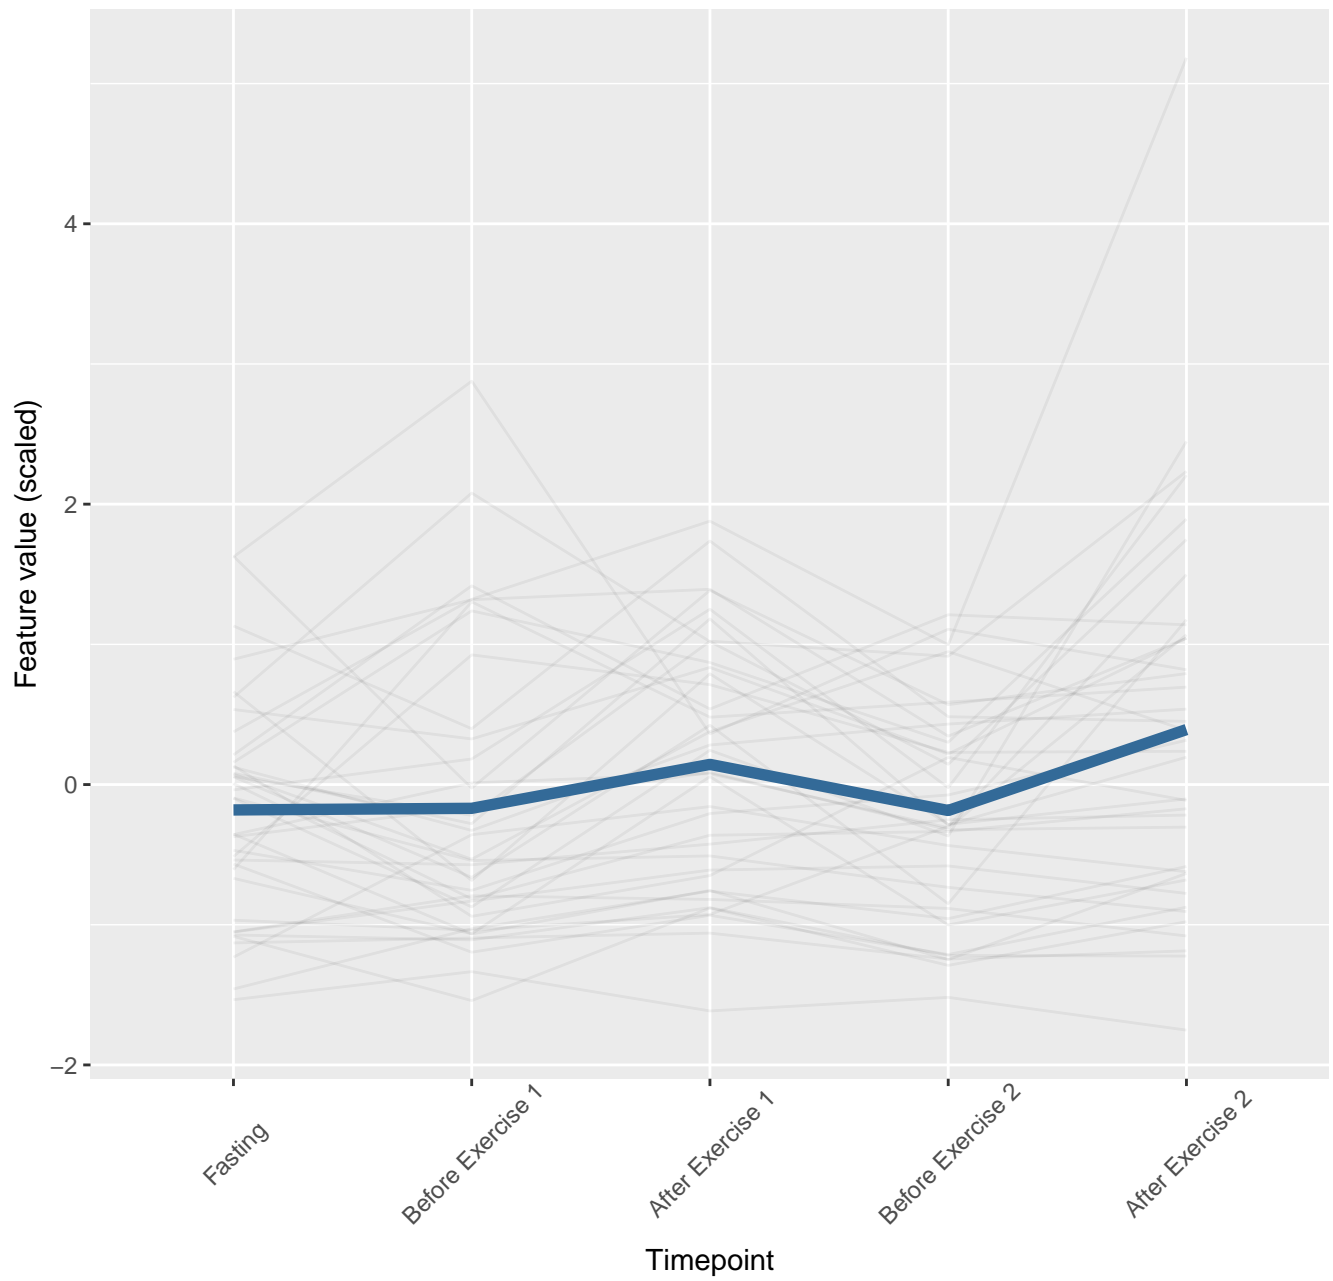

Line plot of PC(35:4)

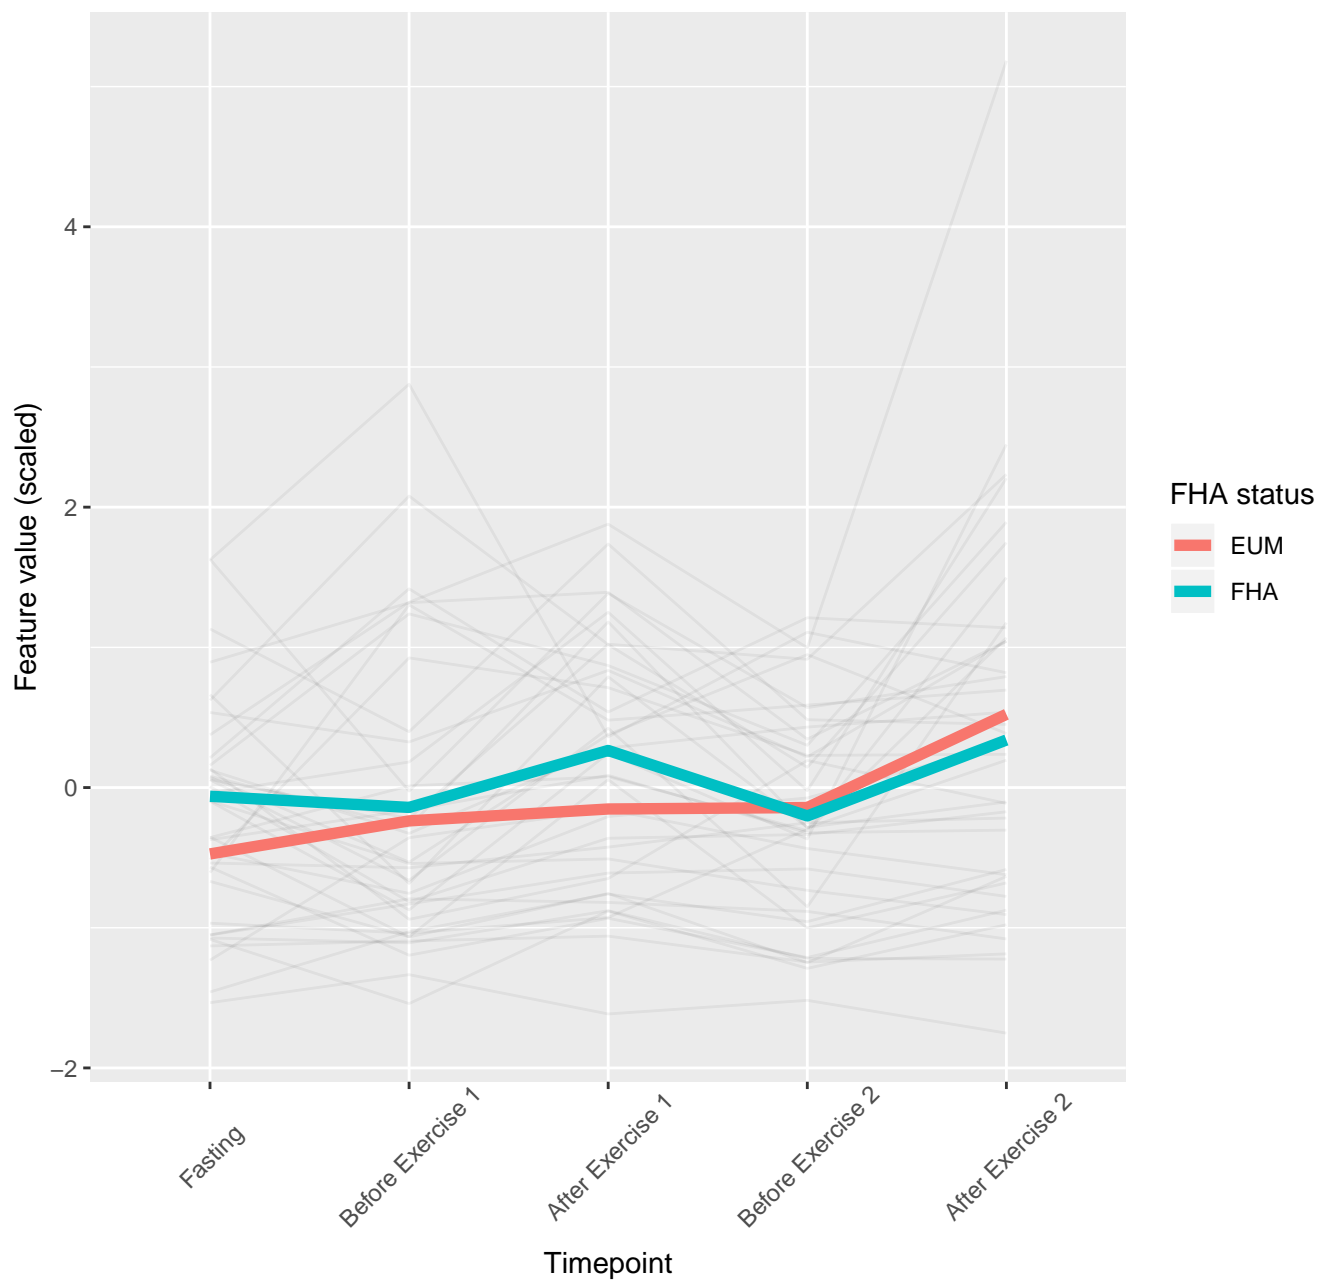

Line plot of PC(35:4)

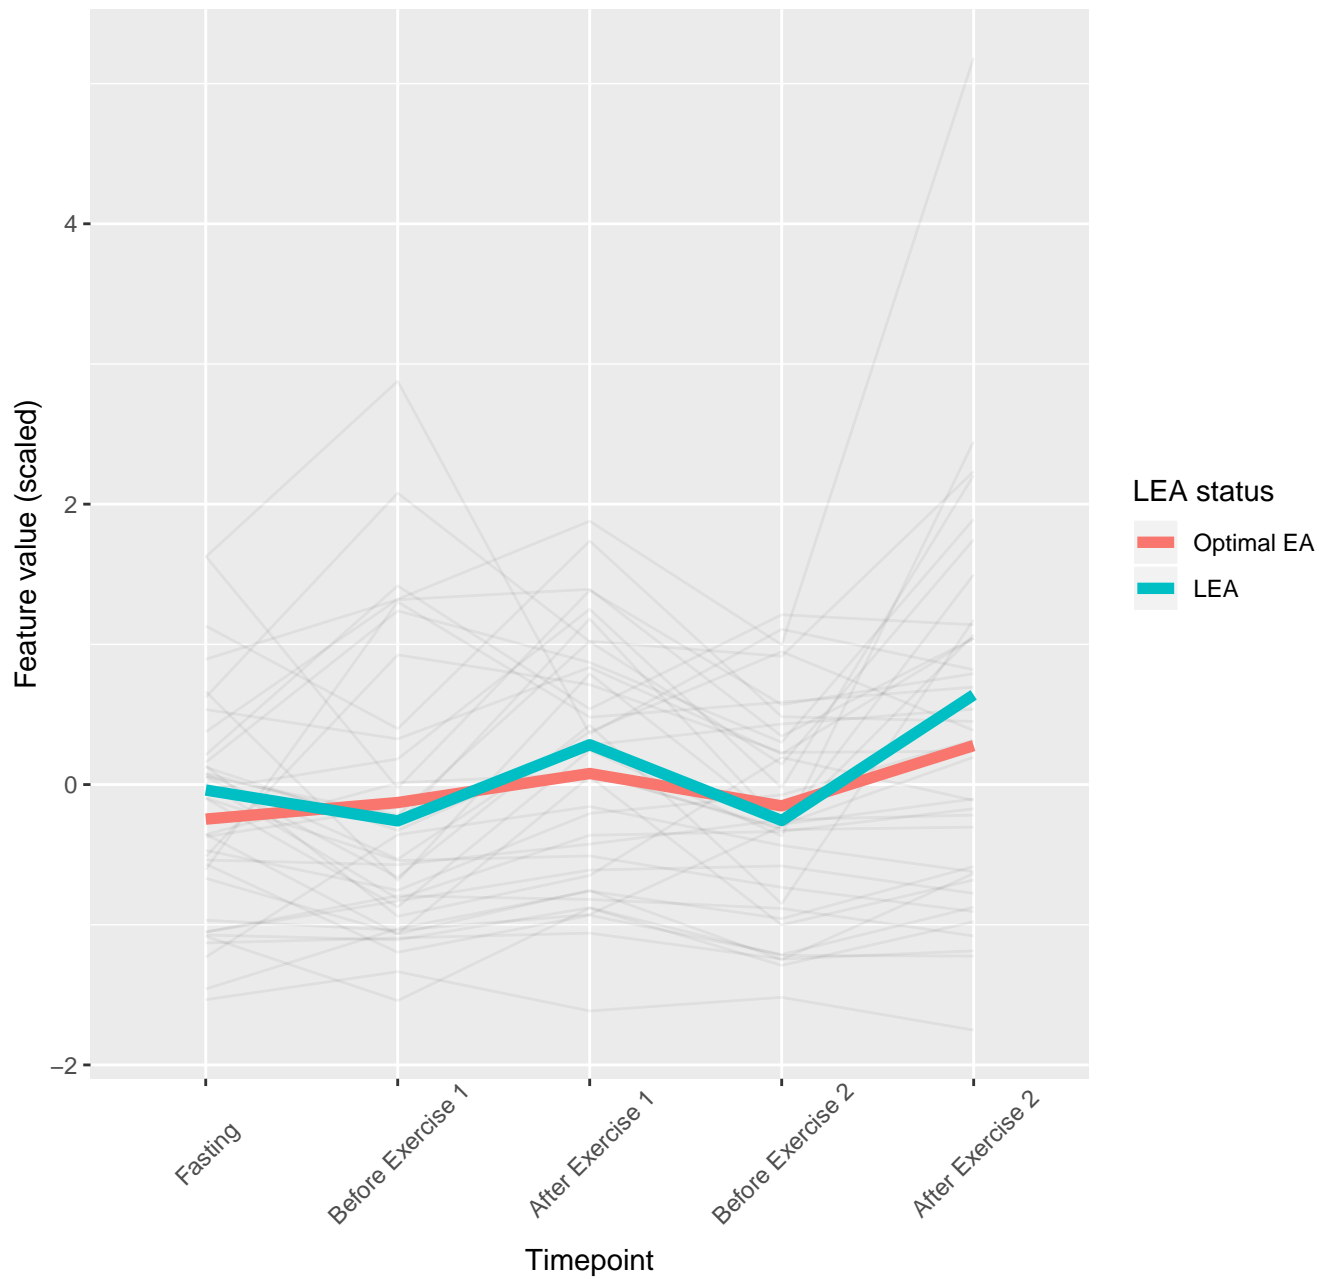

Line plot of PC(36:1)

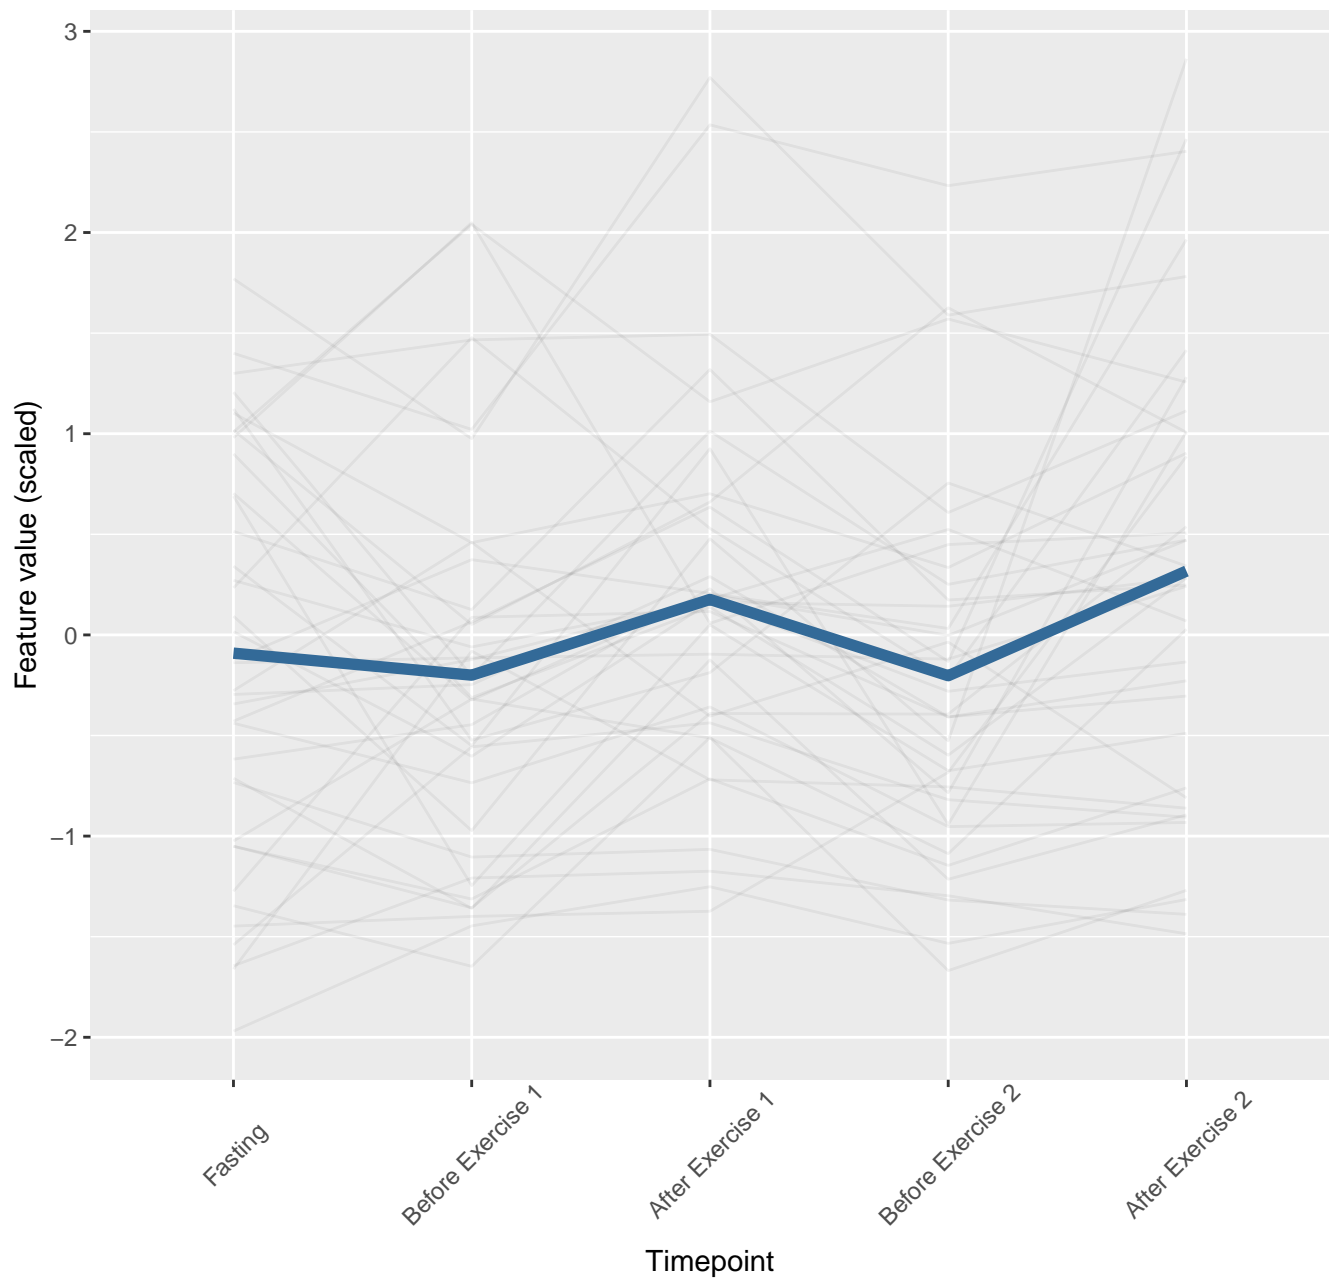

Line plot of PC(36:1)

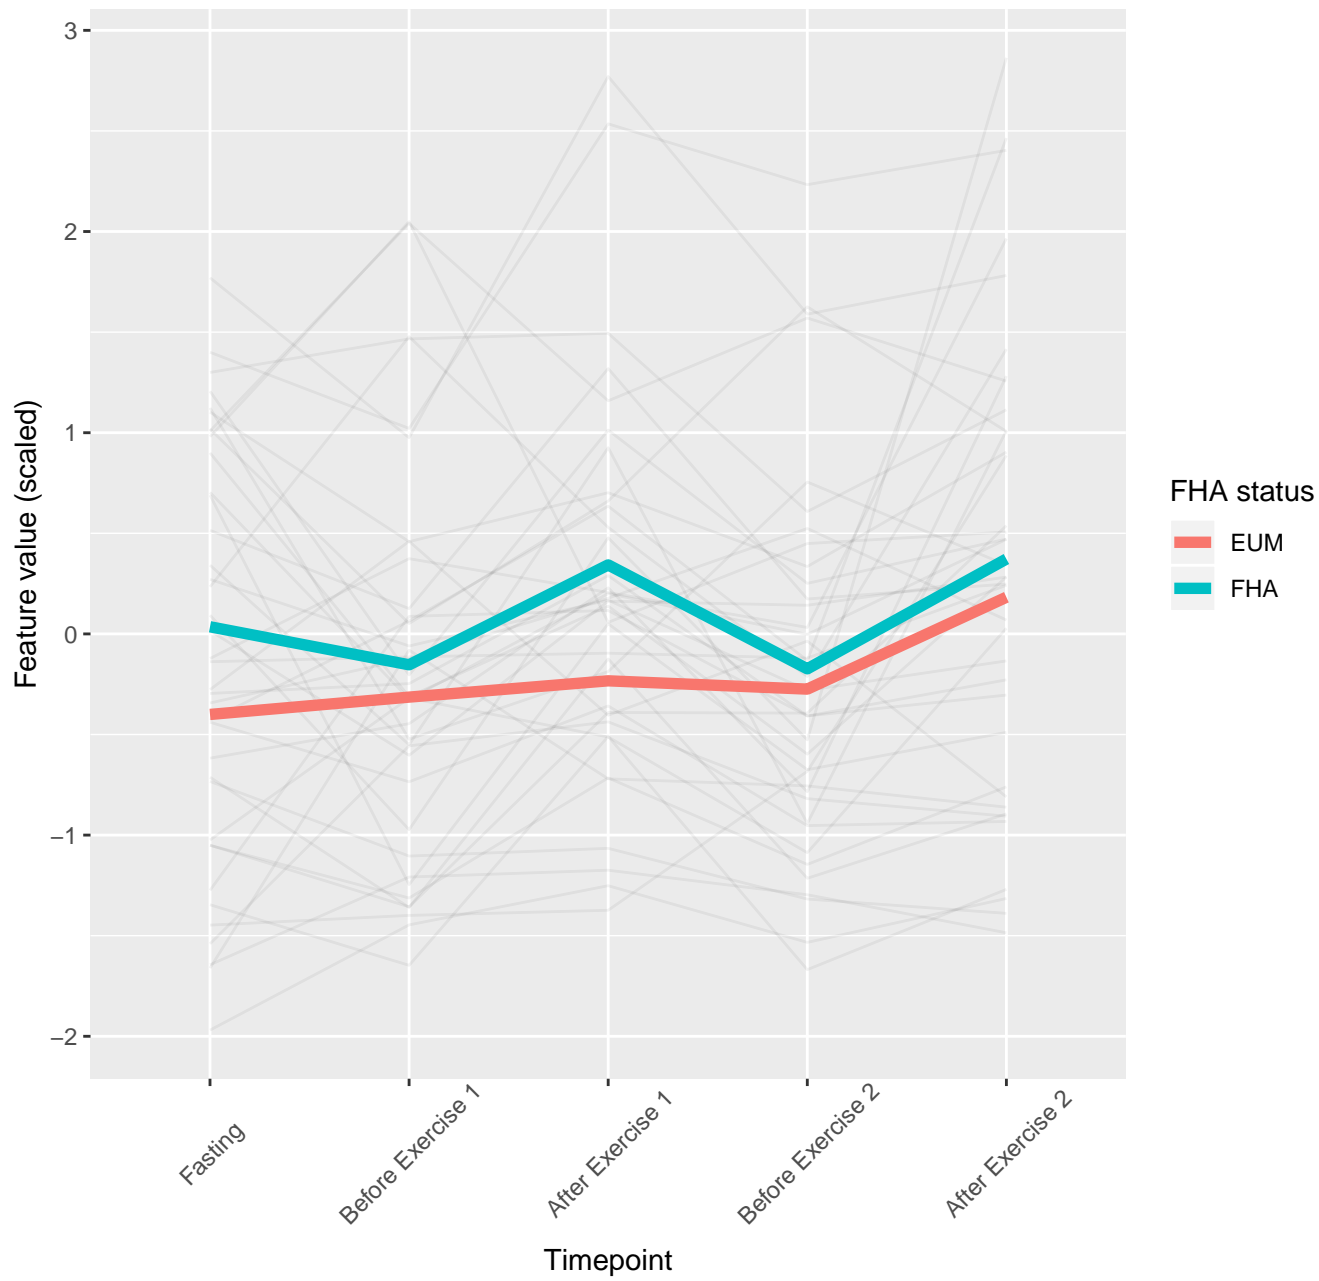

Line plot of PC(36:1)

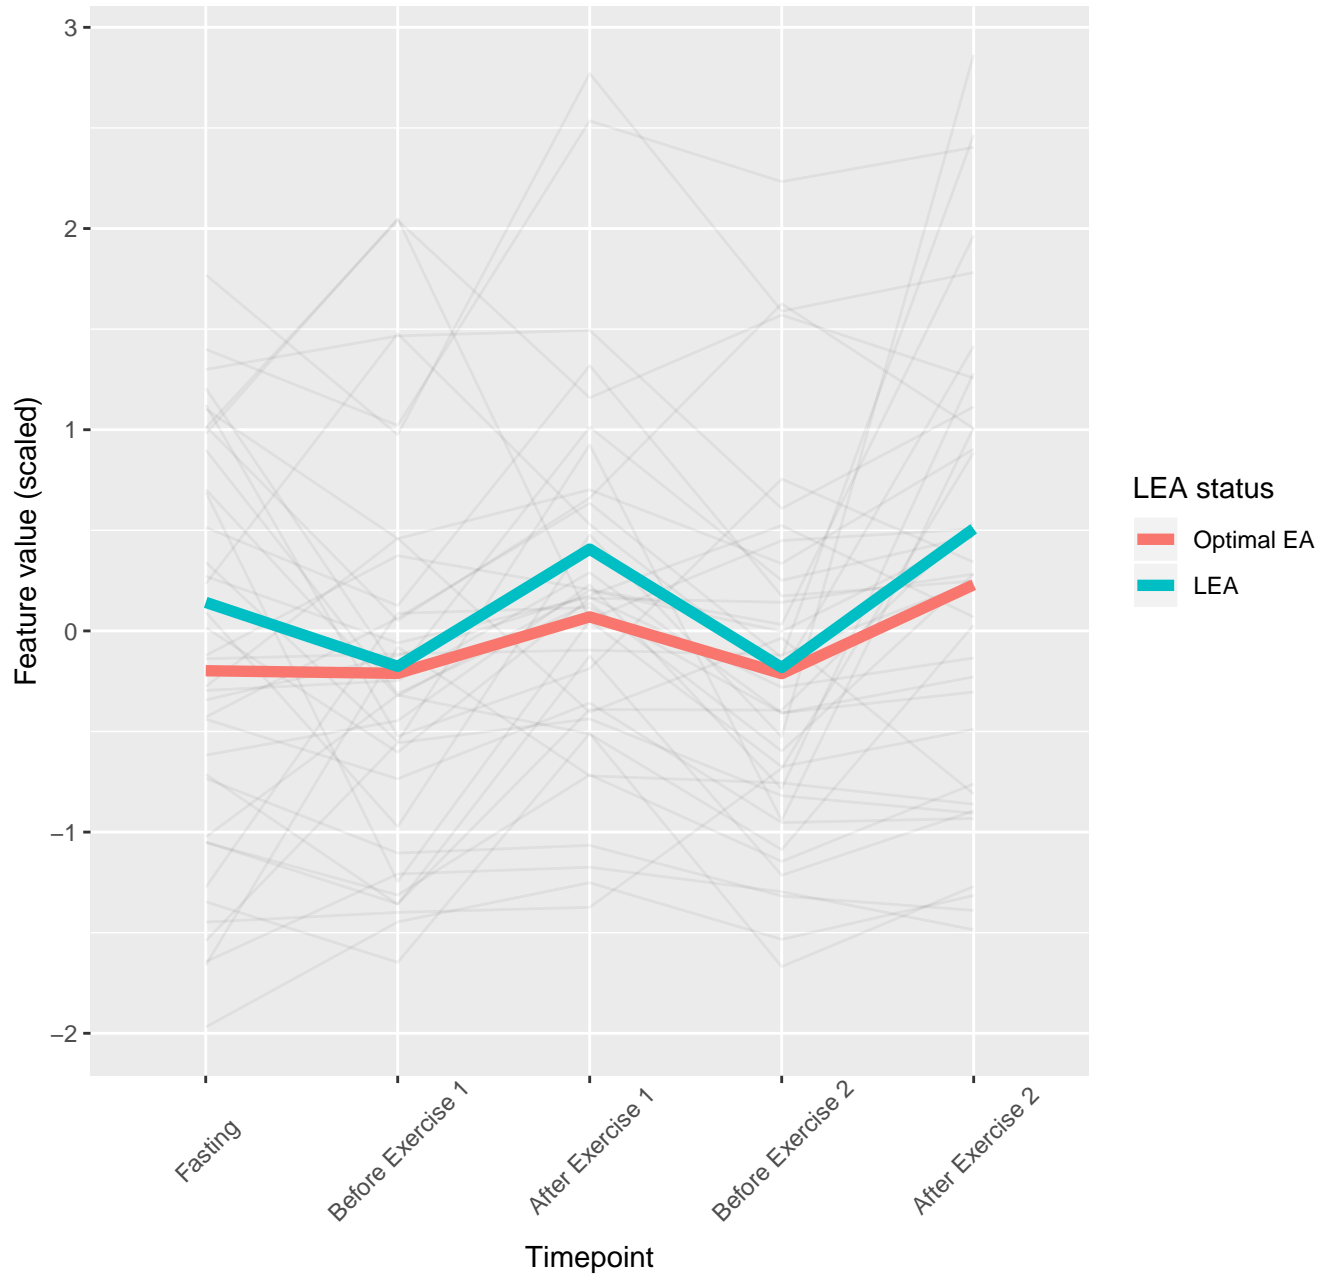

Line plot of PC(36:2)

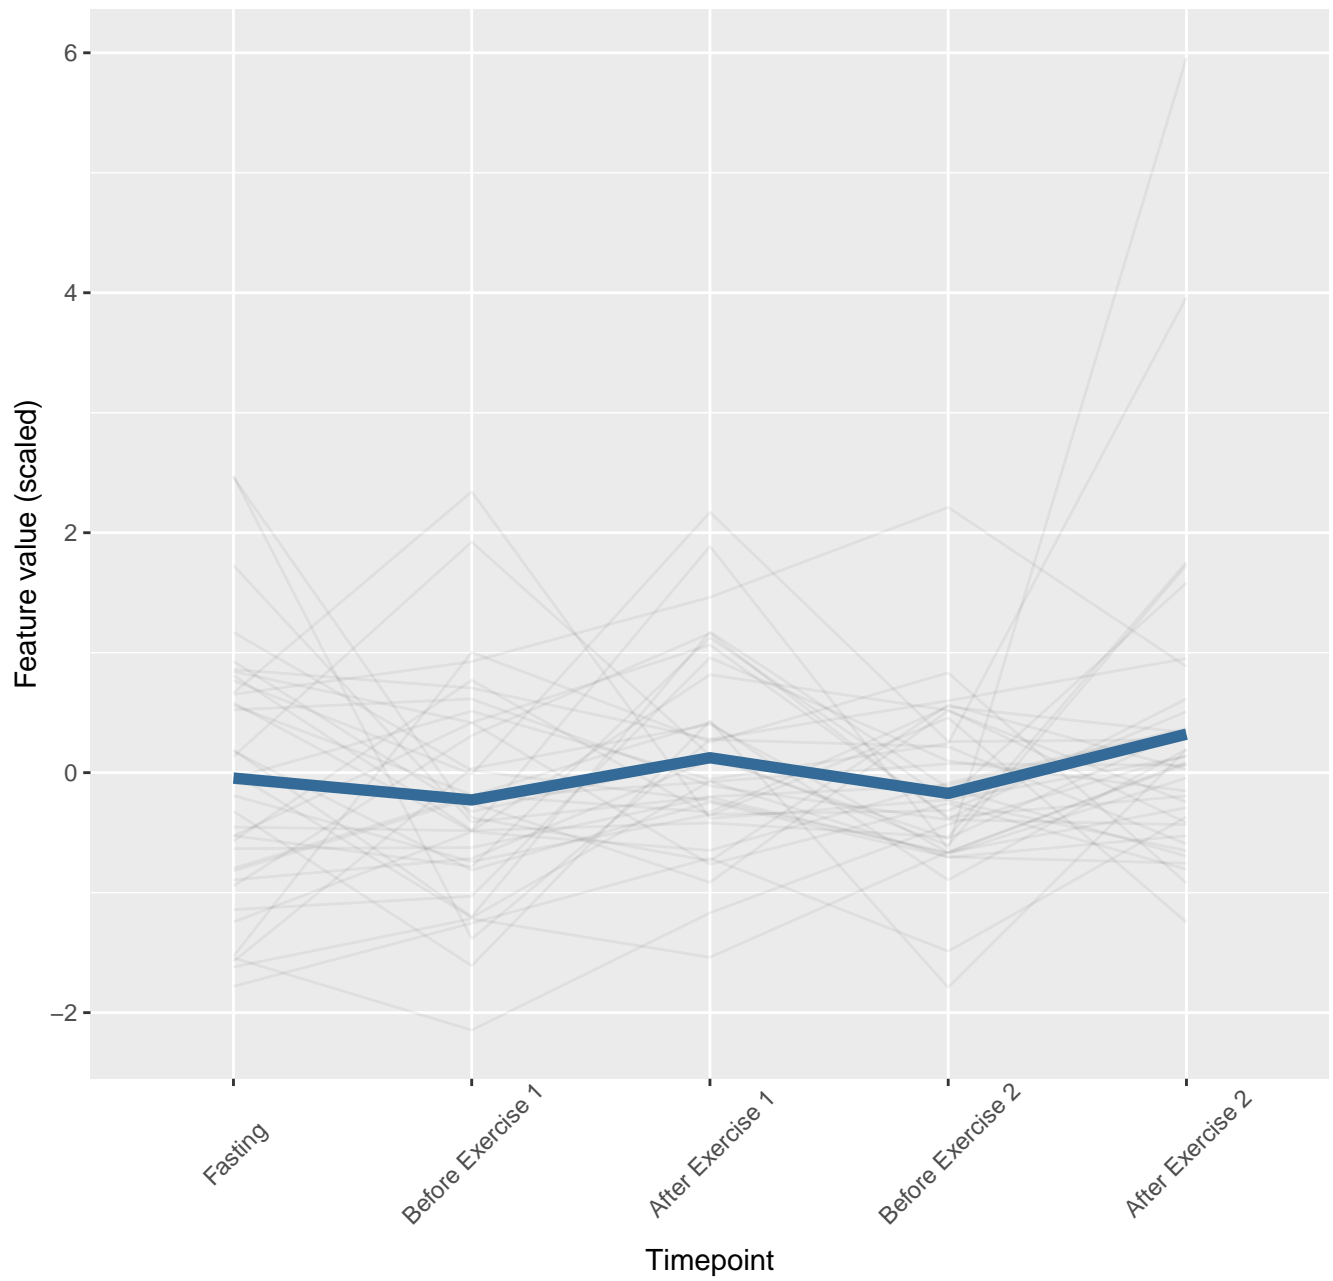

Line plot of PC(36:2)

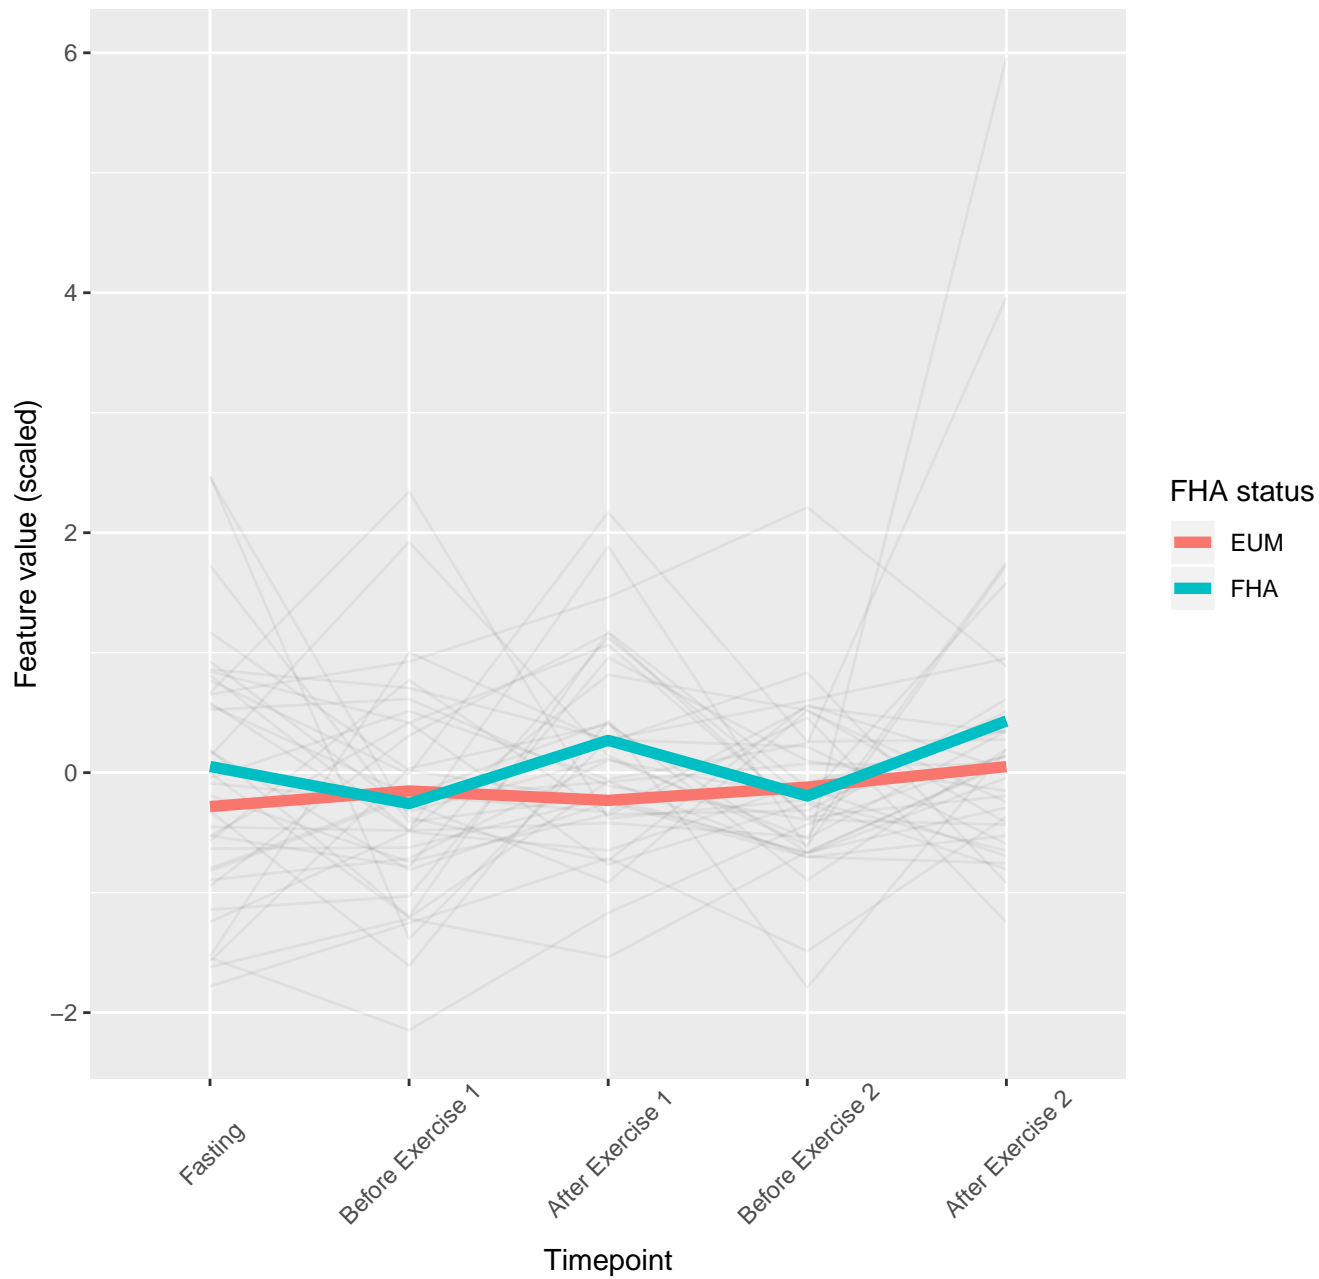



Line plot of PC(36:2)

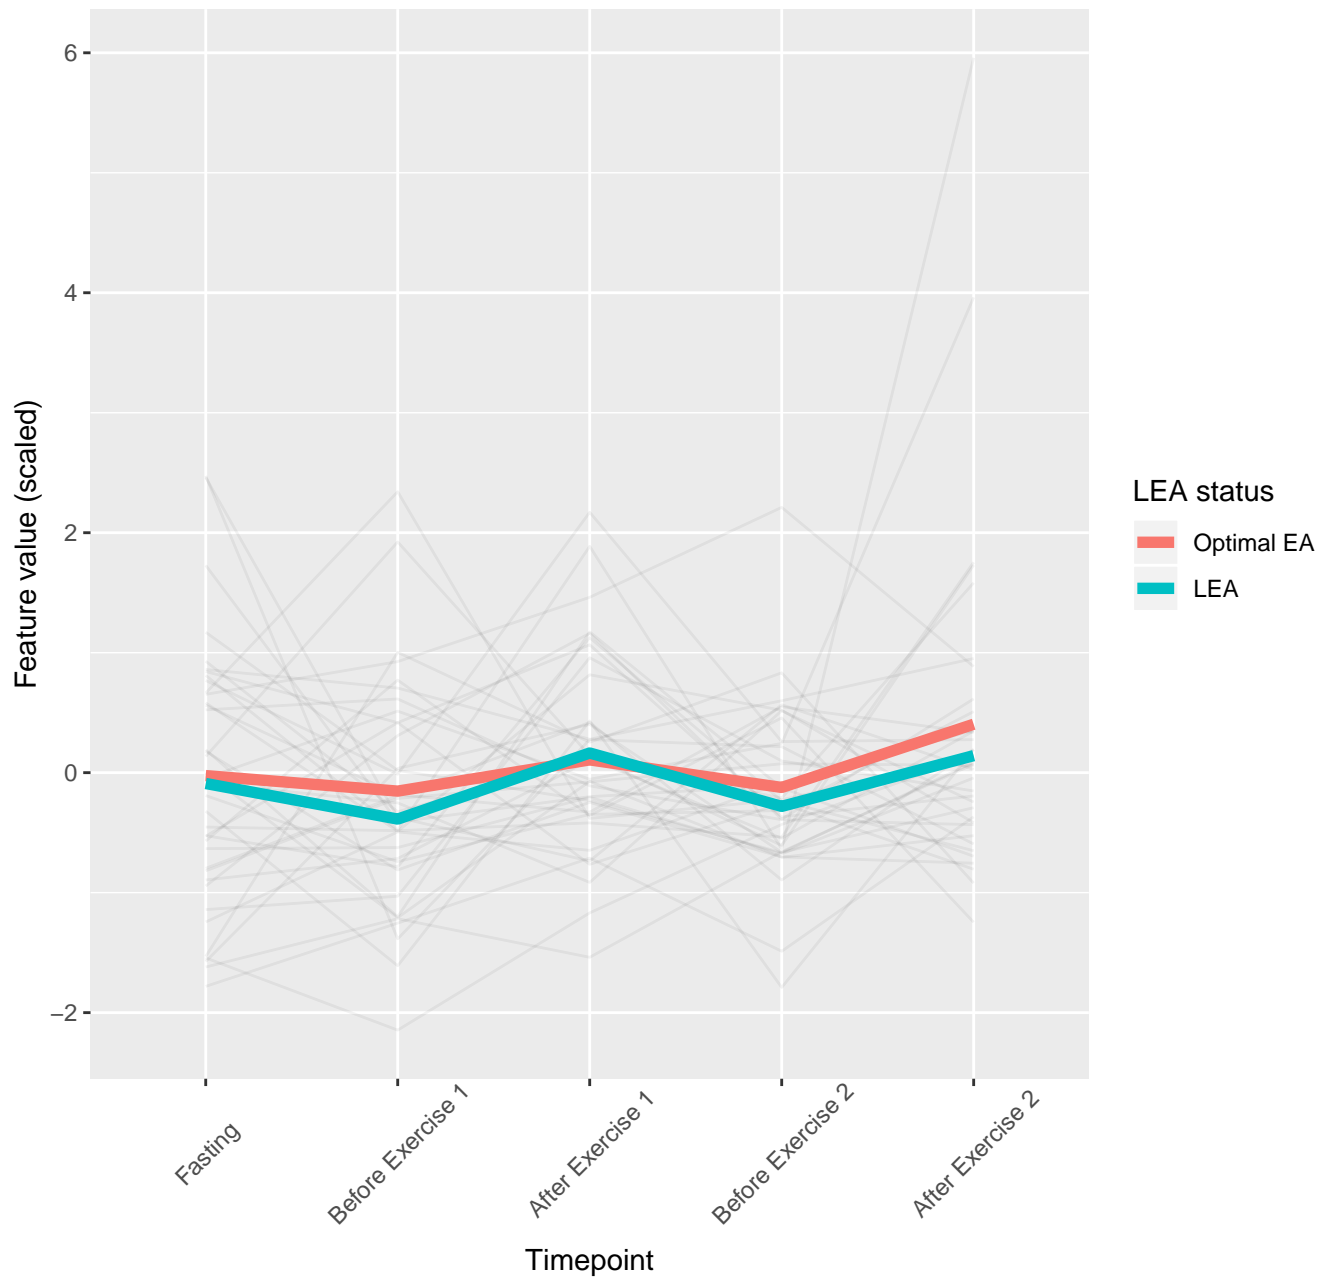

Line plot of PC(36:3)

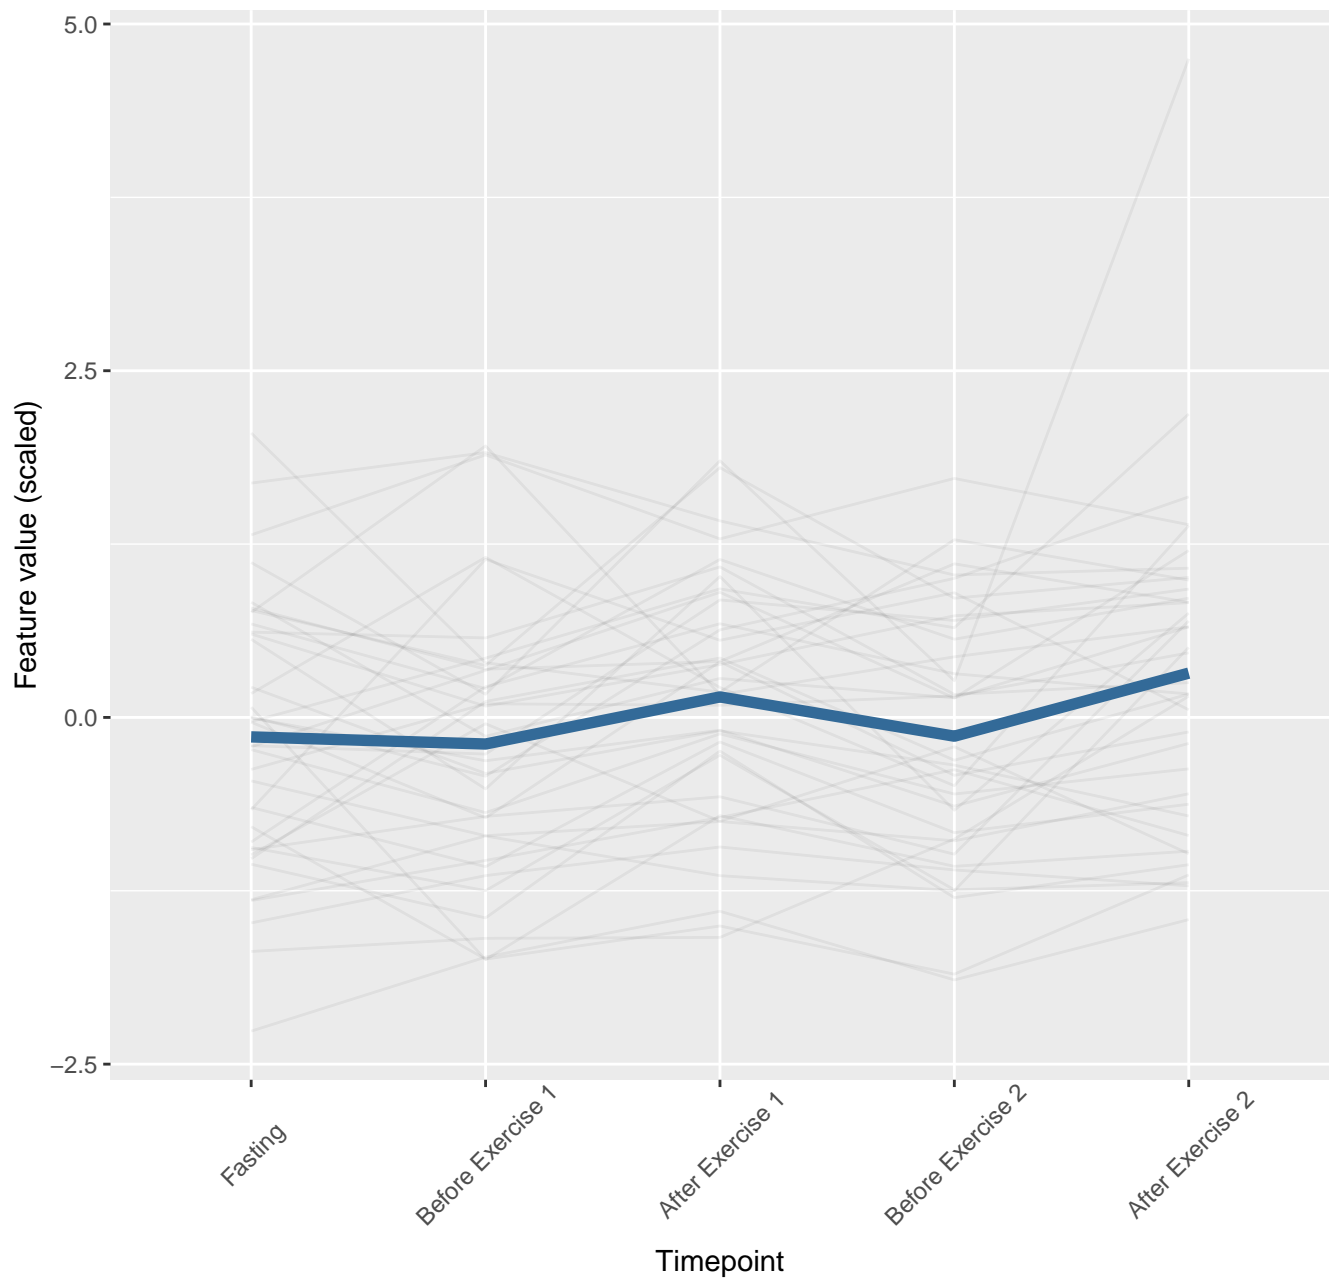

Line plot of PC(36:3)

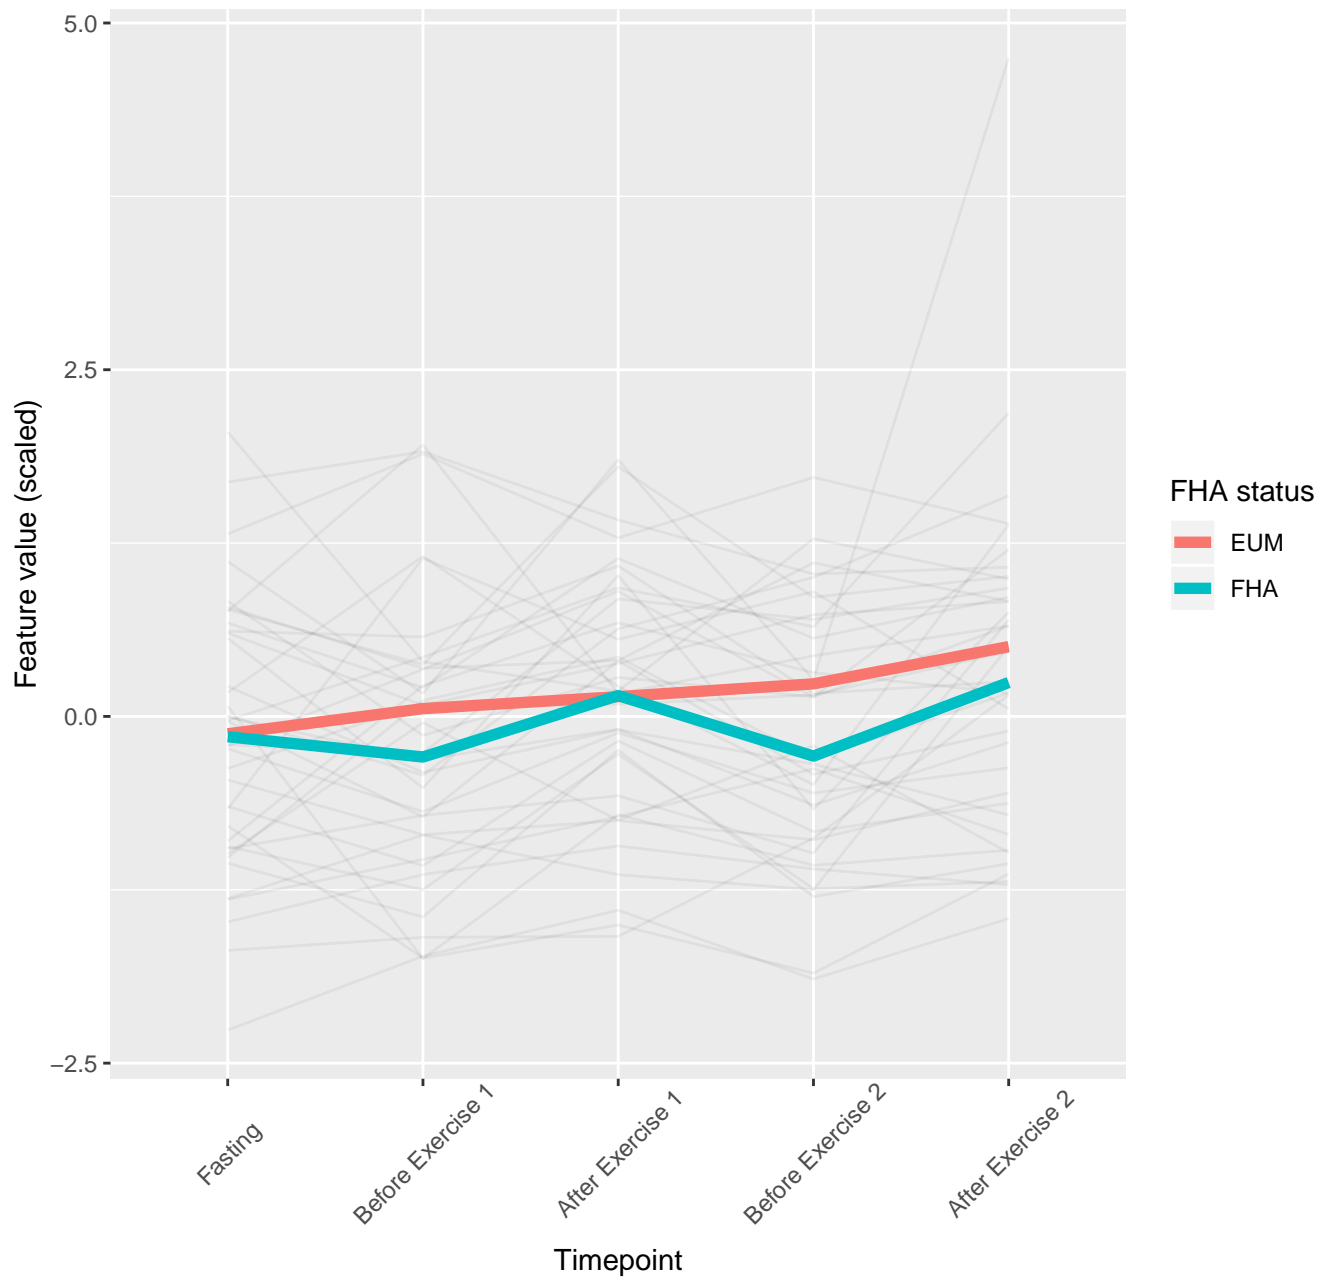

Line plot of PC(36:3)

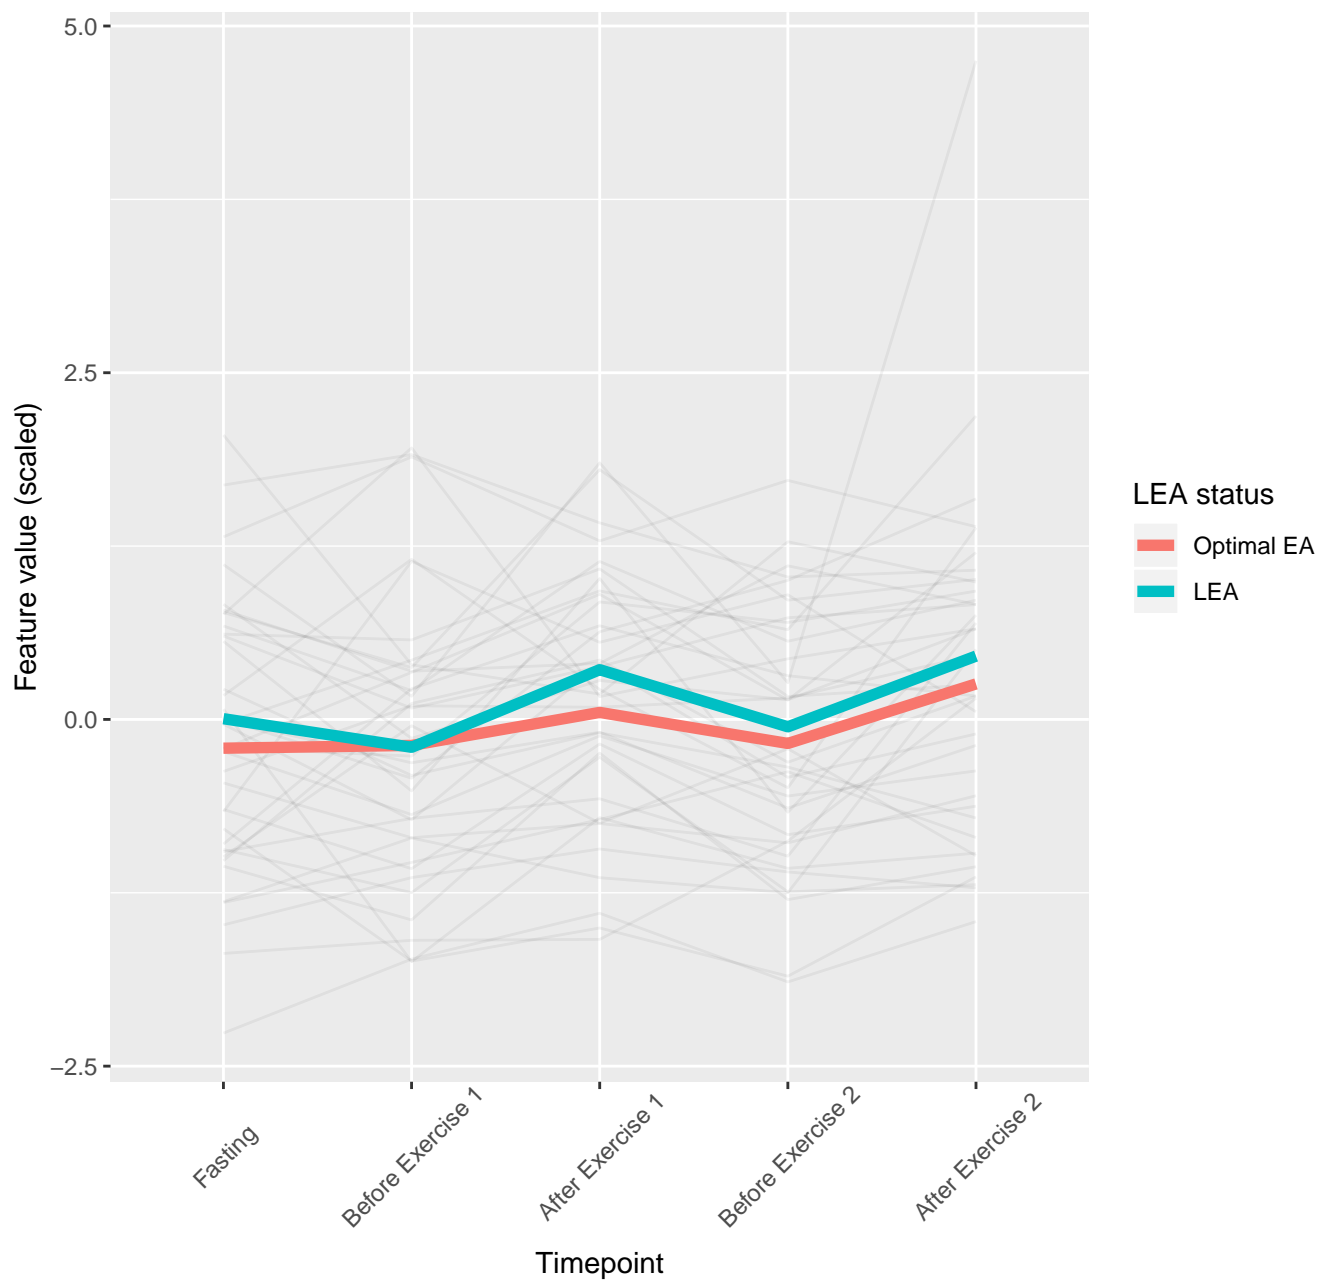

Line plot of PC(36:4)

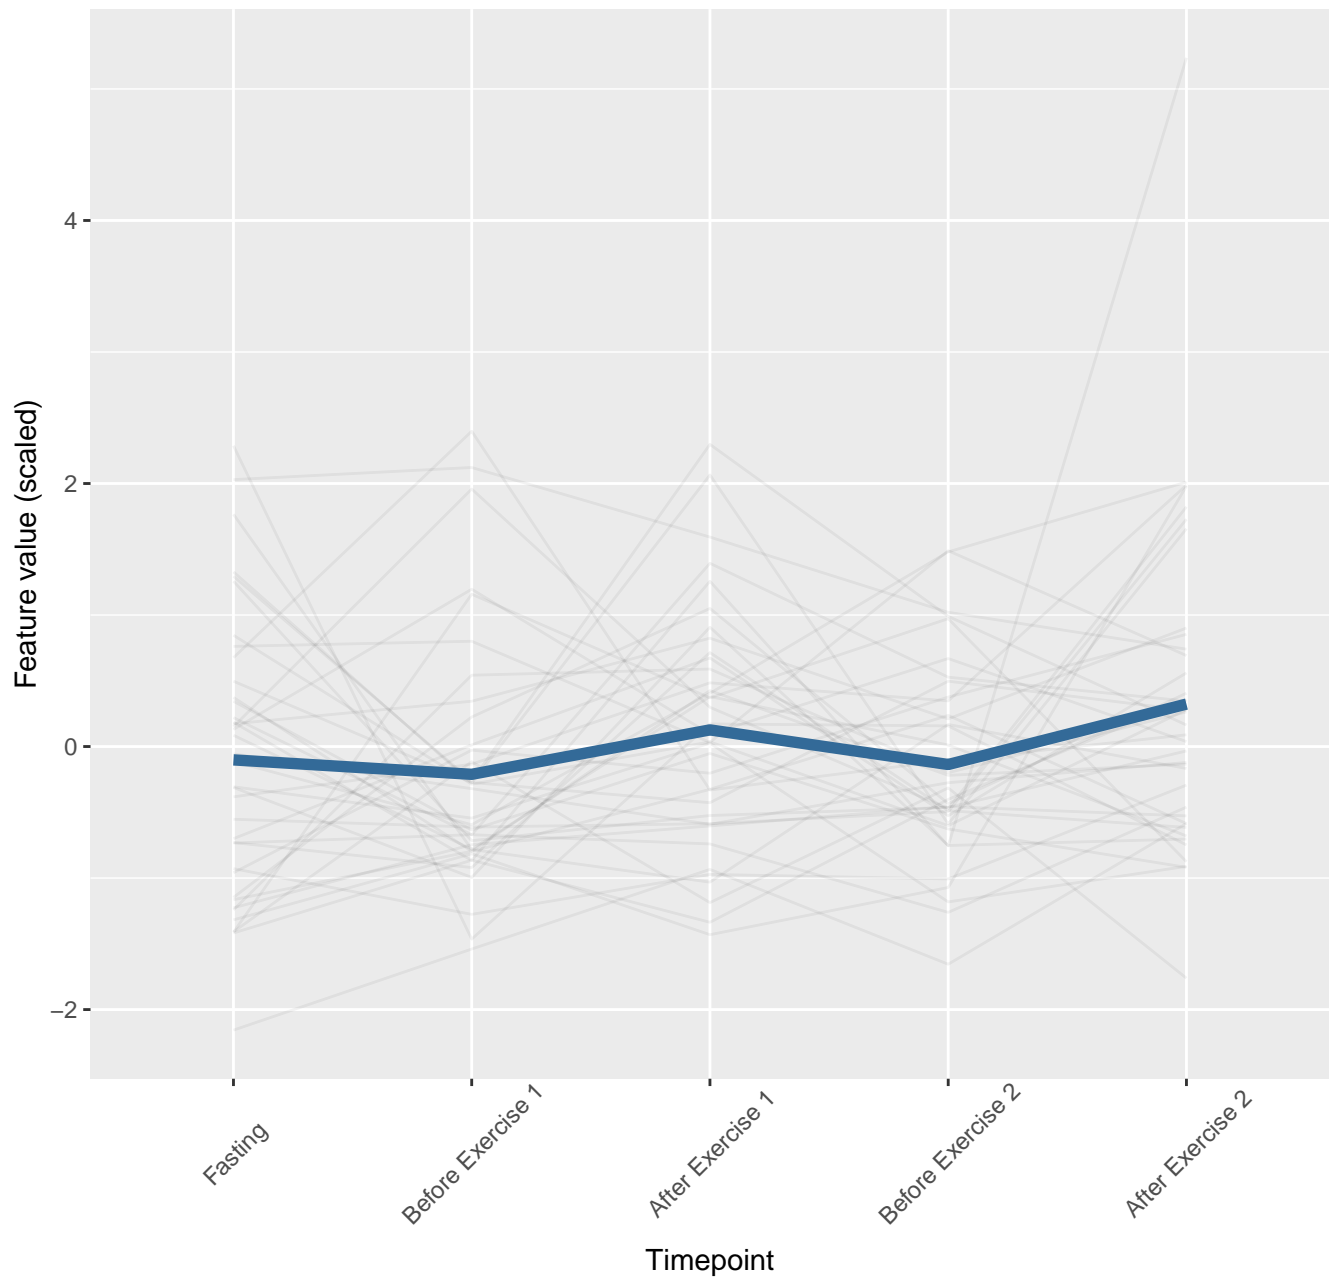

Line plot of PC(36:4)

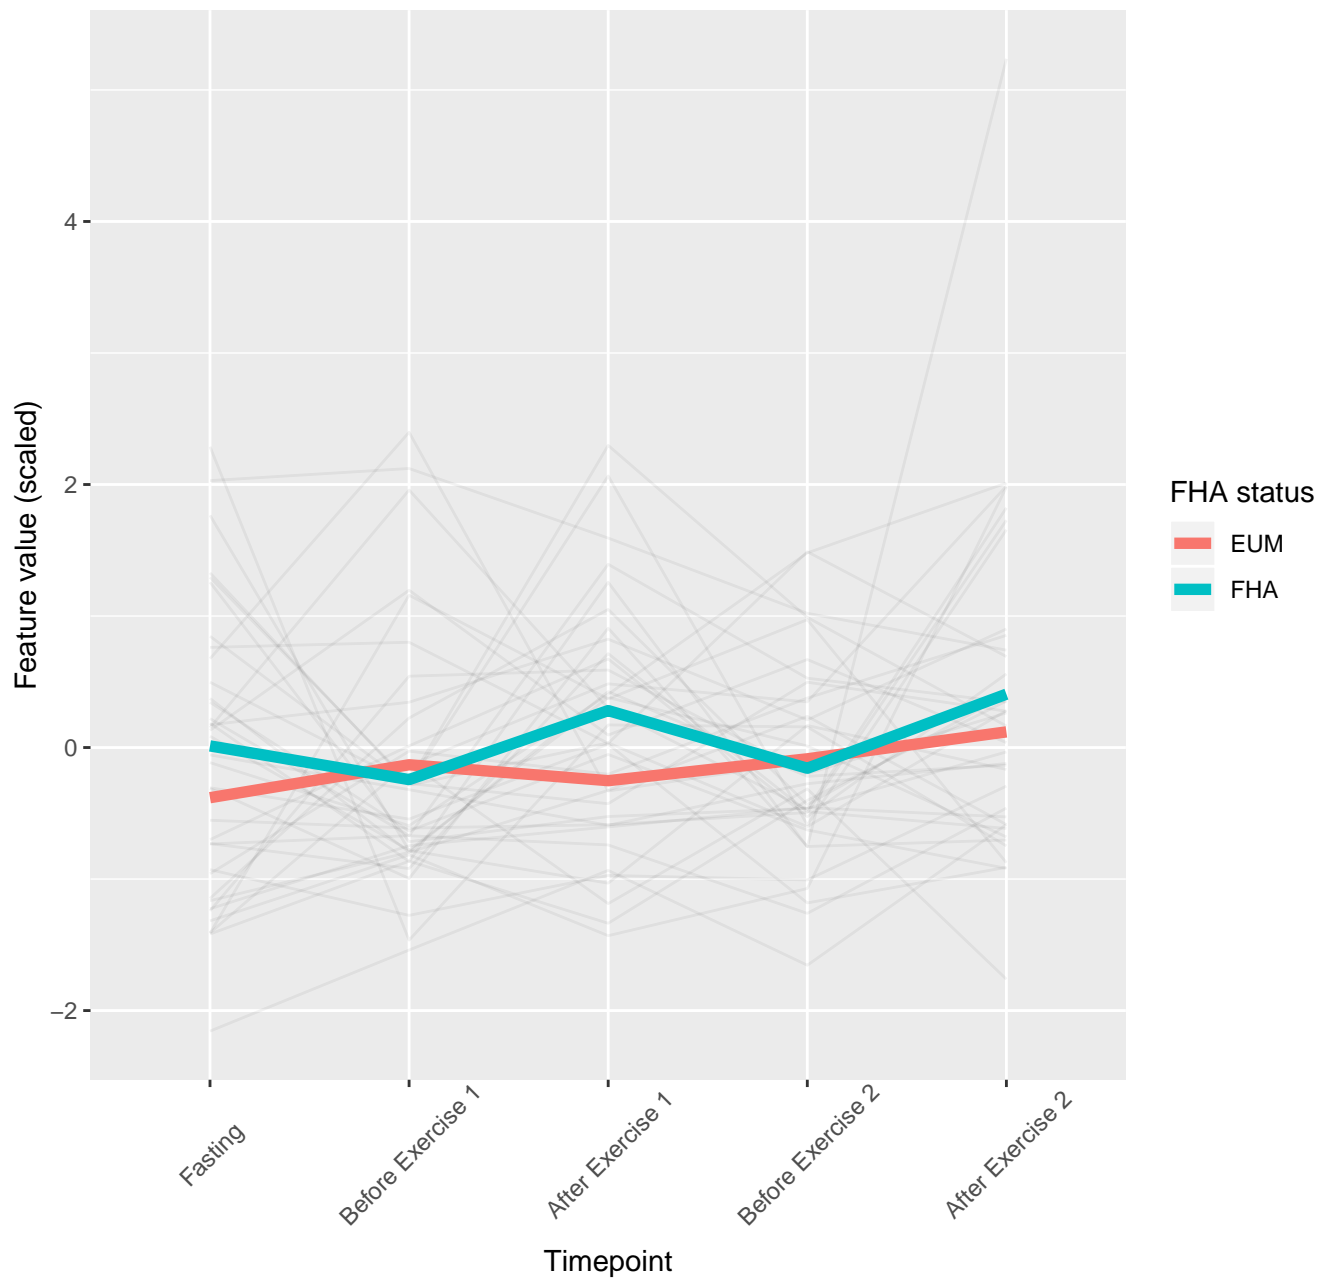

Line plot of PC(36:4)

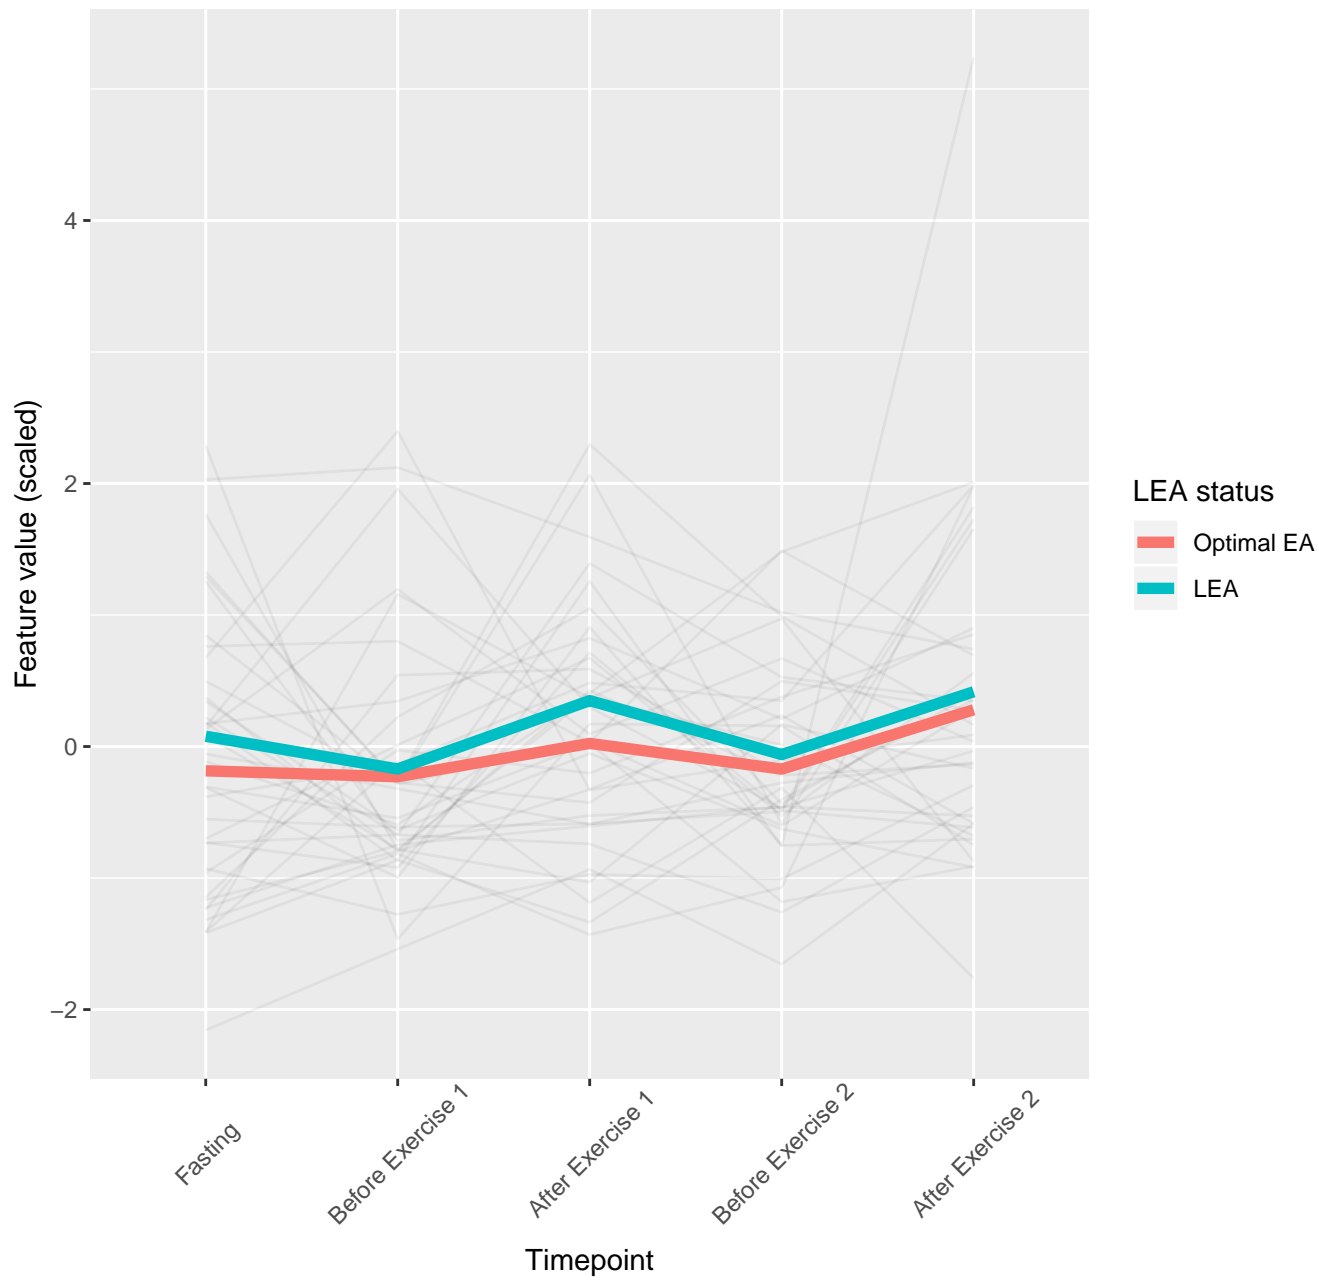

Line plot of PC(36:5)

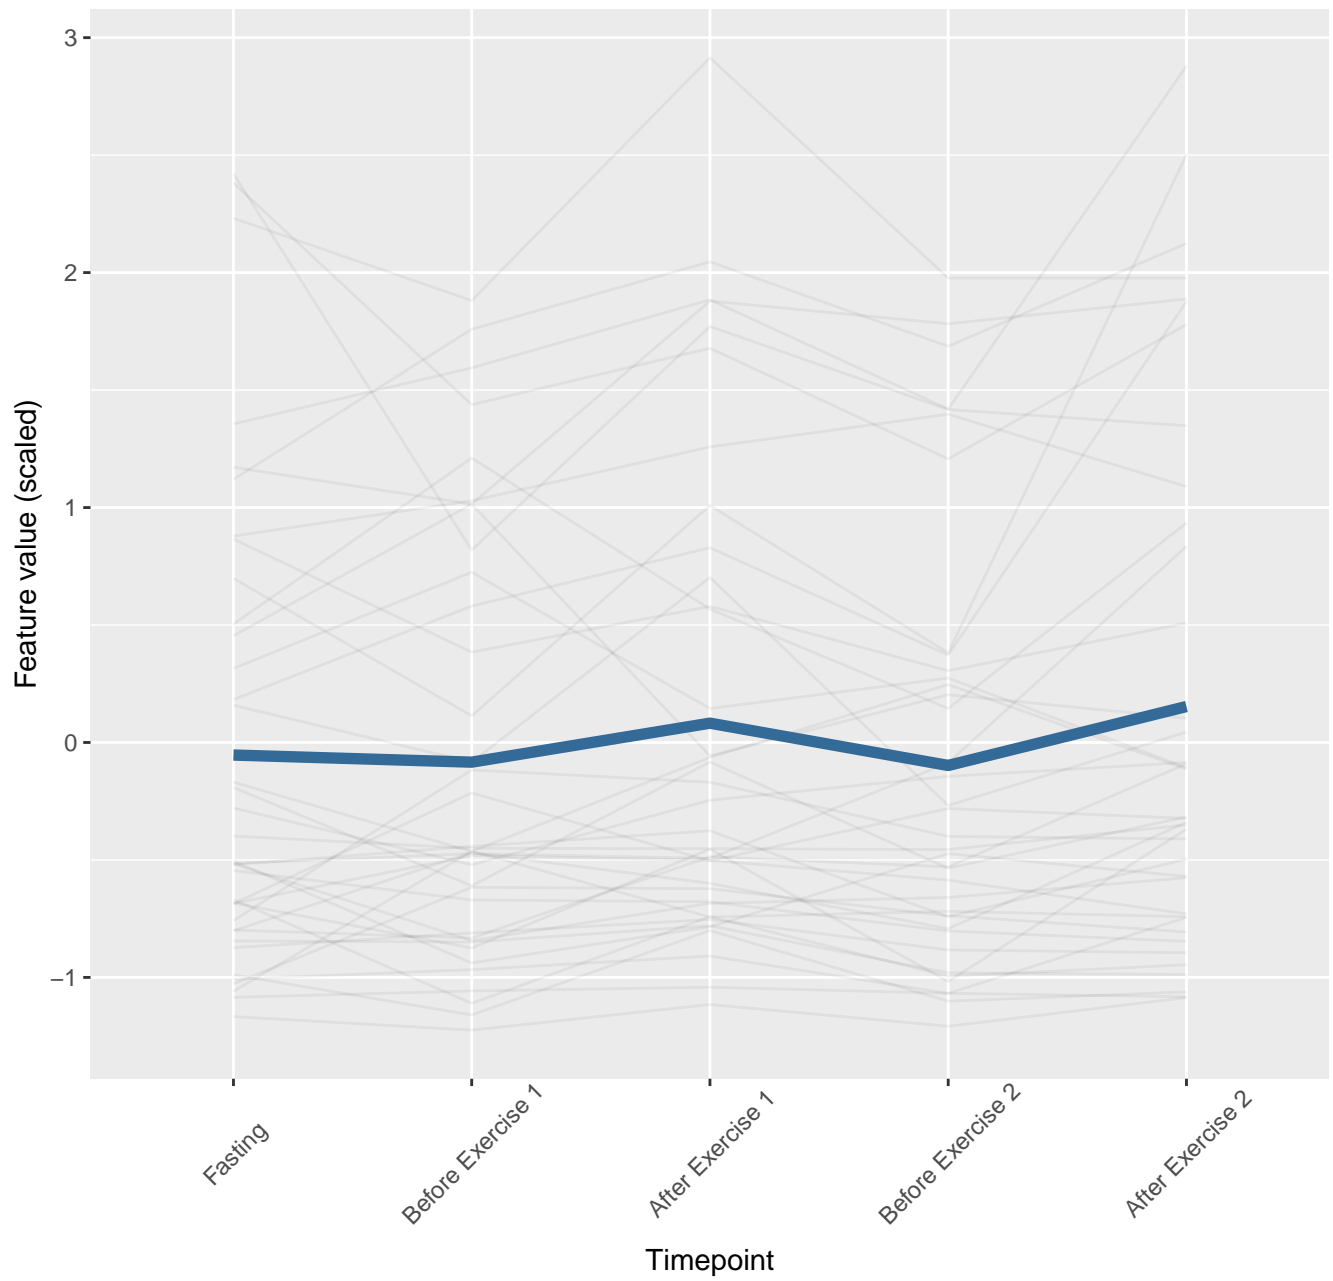



Line plot of PC(36:5)

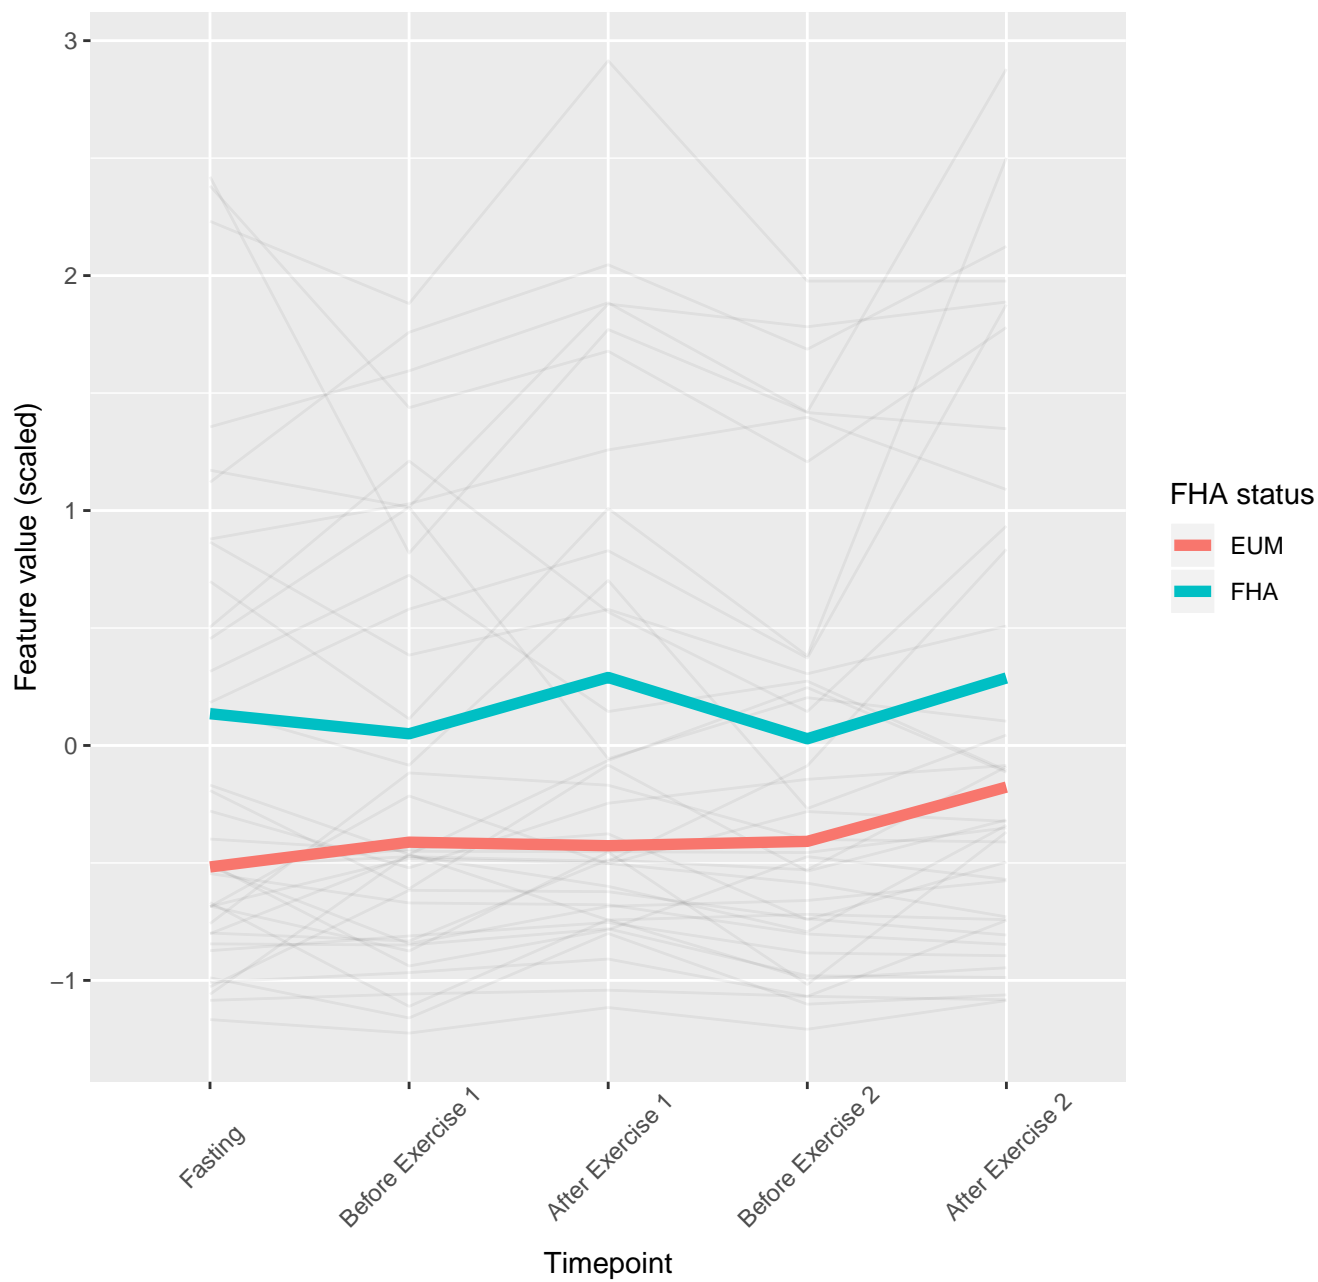

Line plot of PC(36:5)

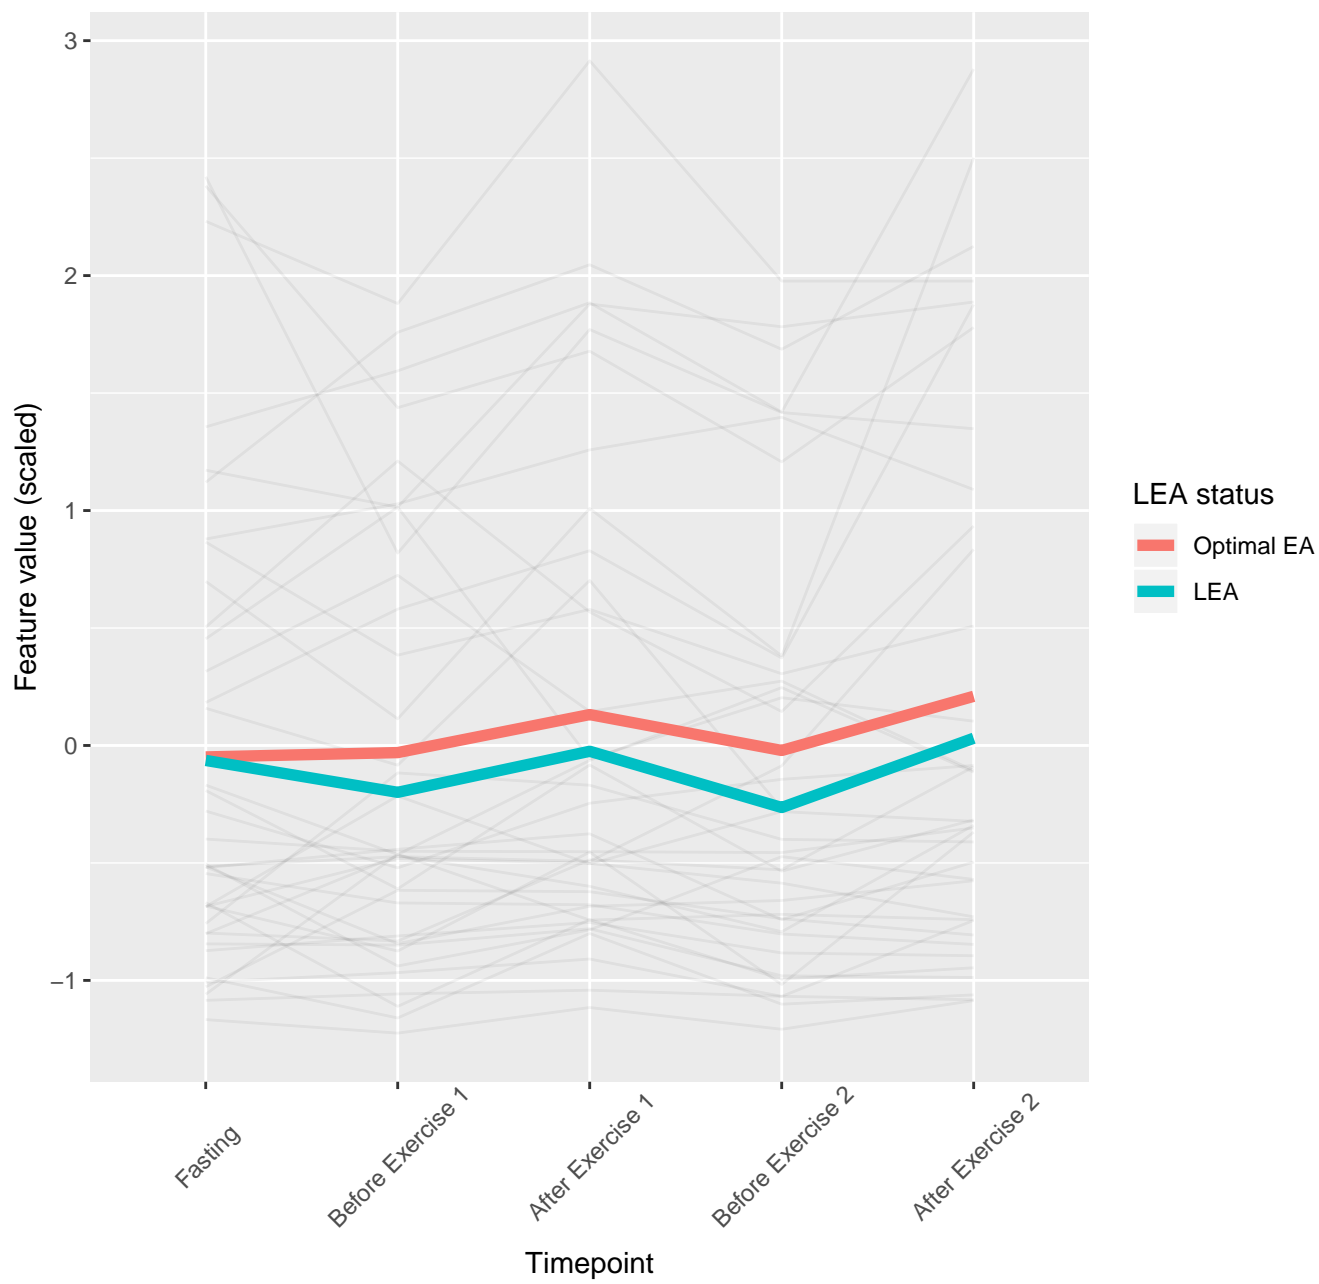

Line plot of PC(36:6)

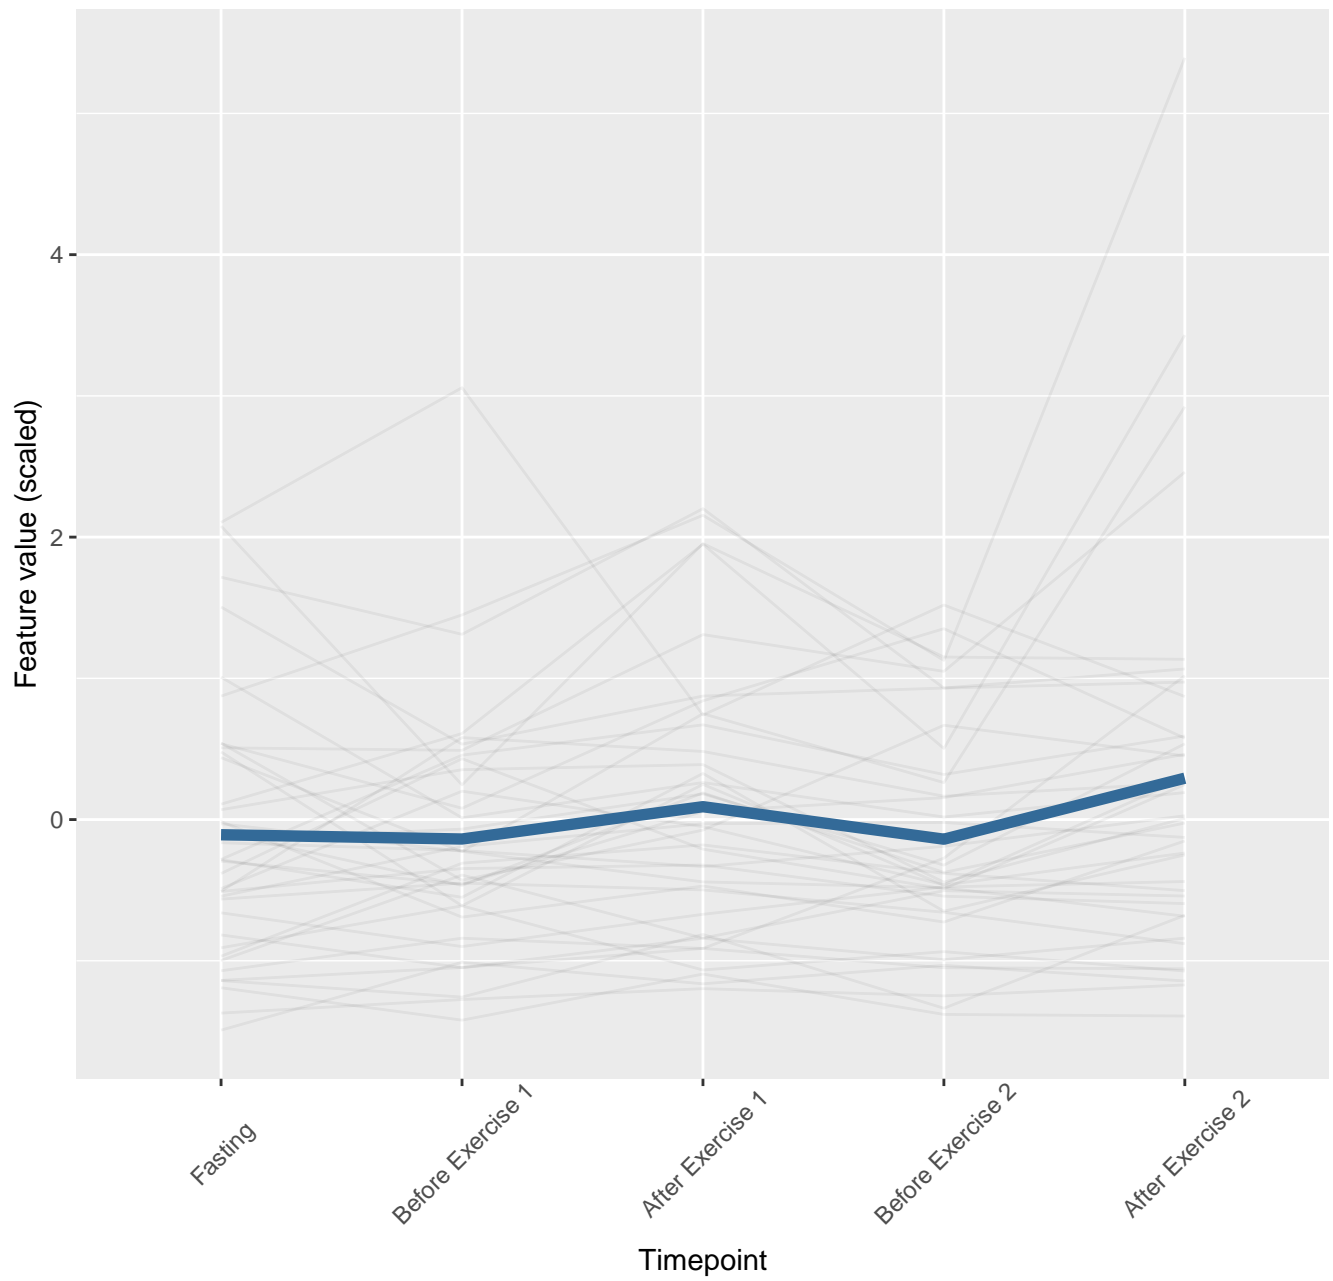

Line plot of PC(36:6)

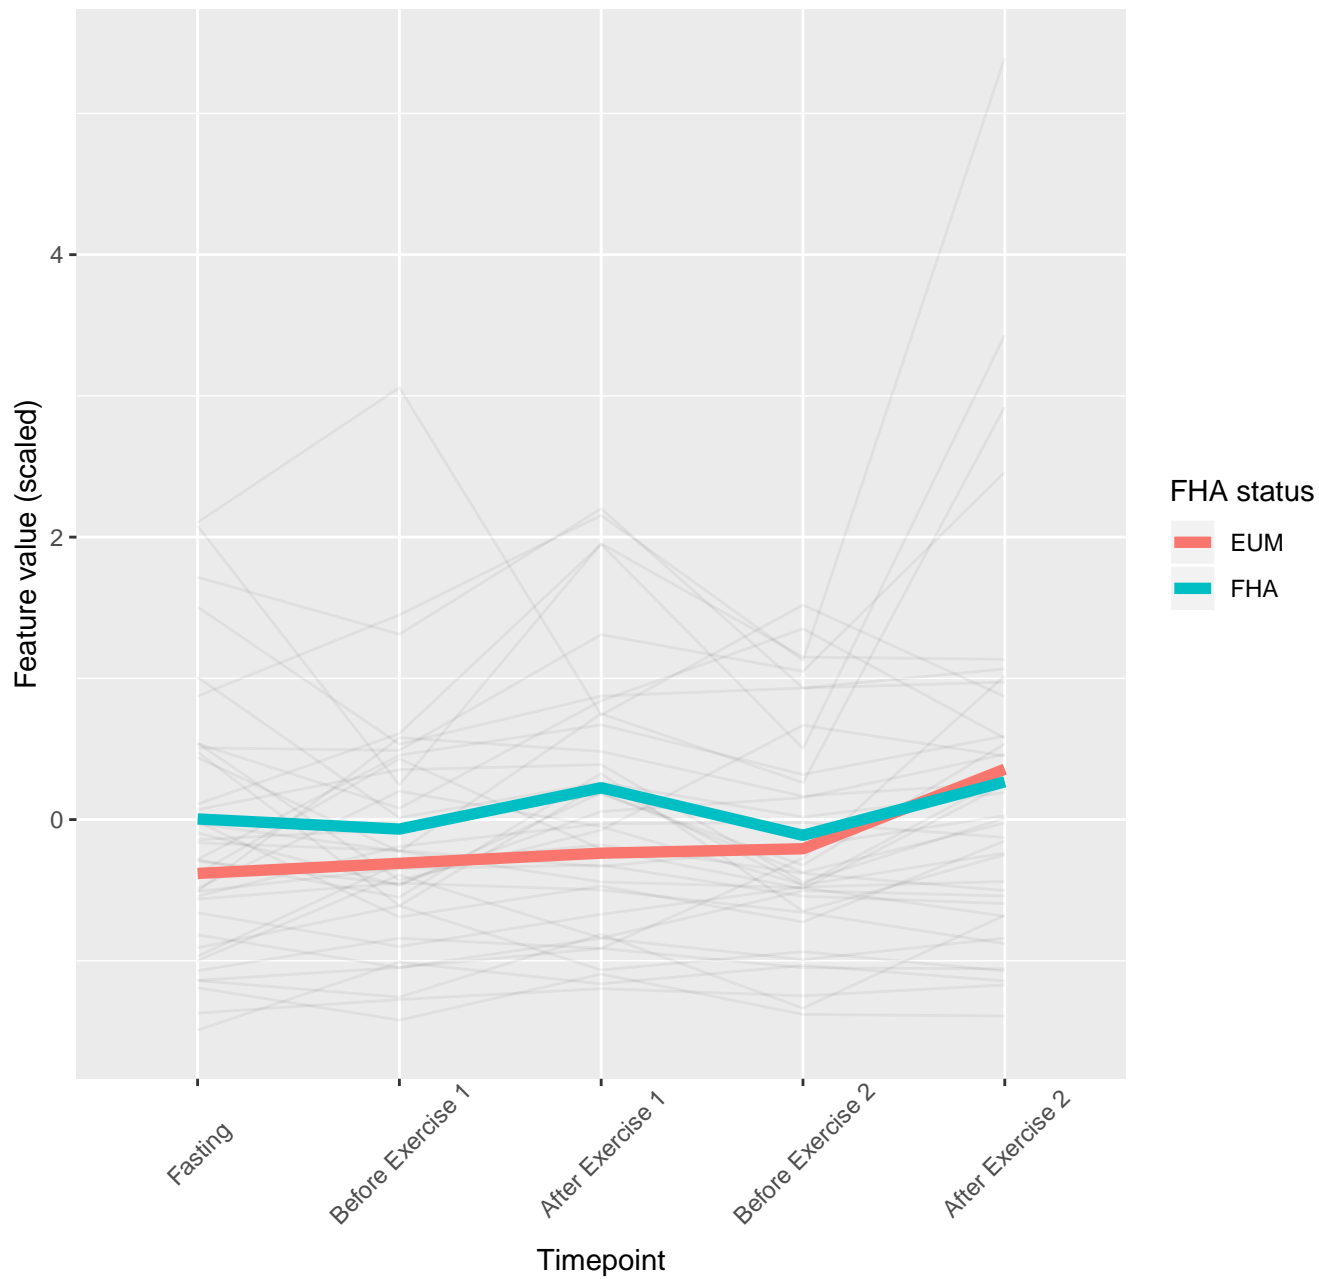

Line plot of PC(36:6)

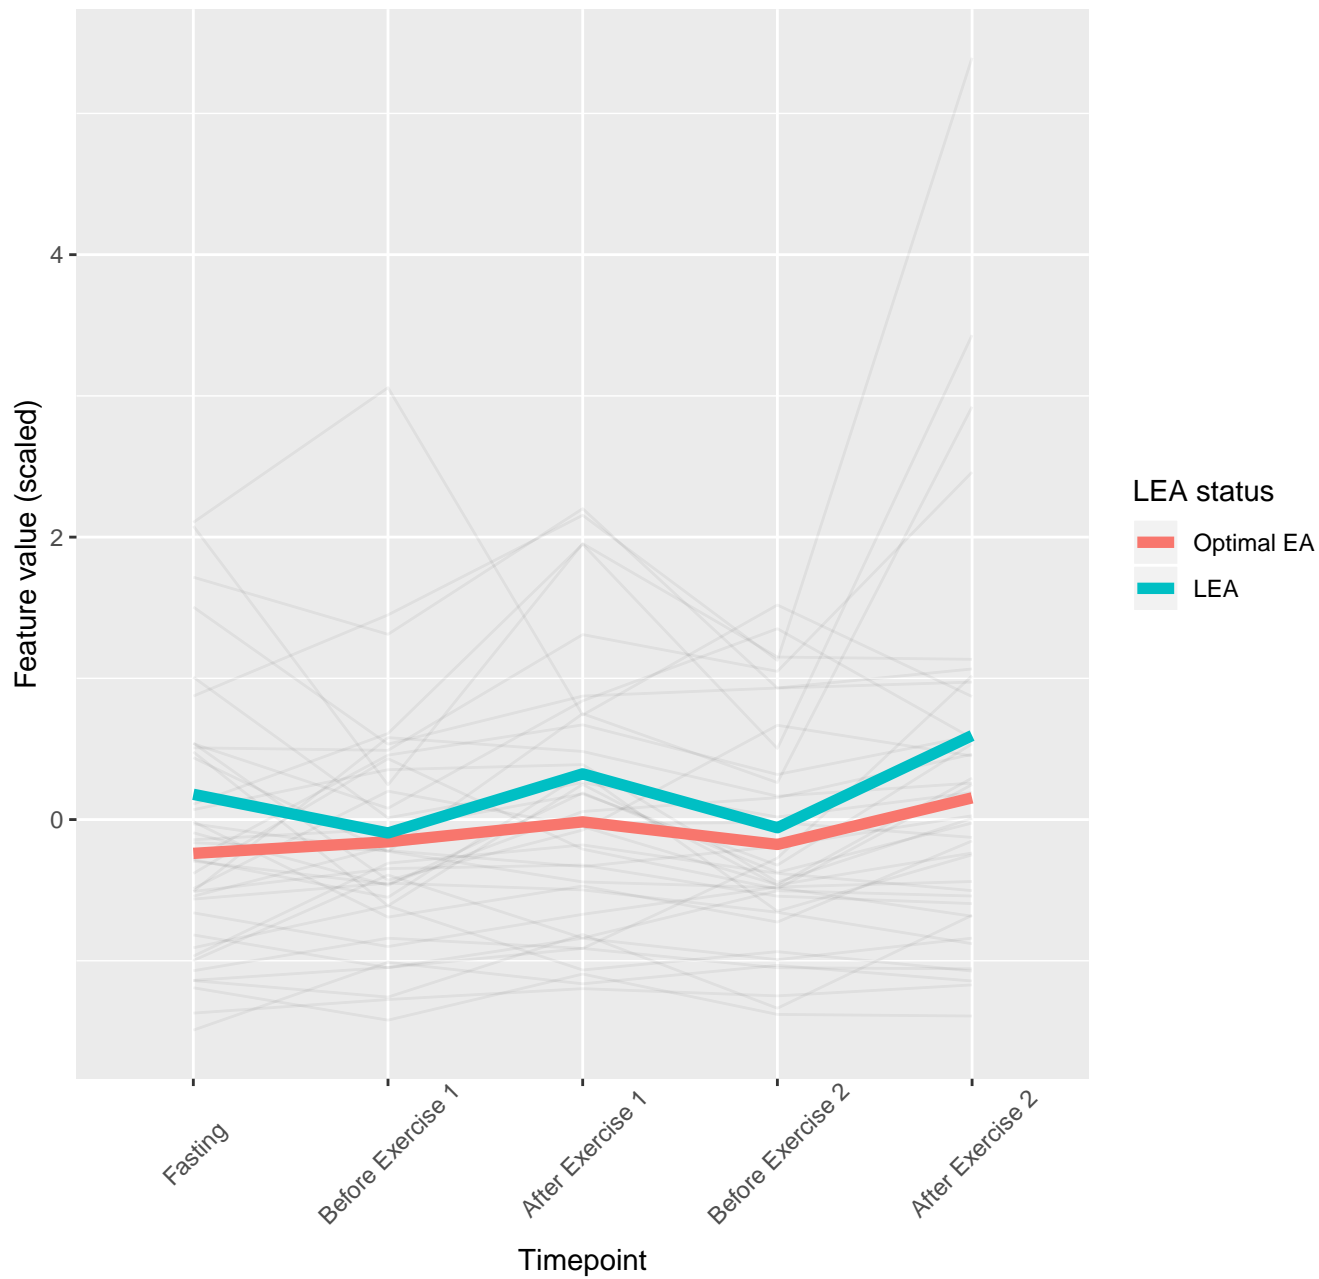

Line plot of PC(37:1)

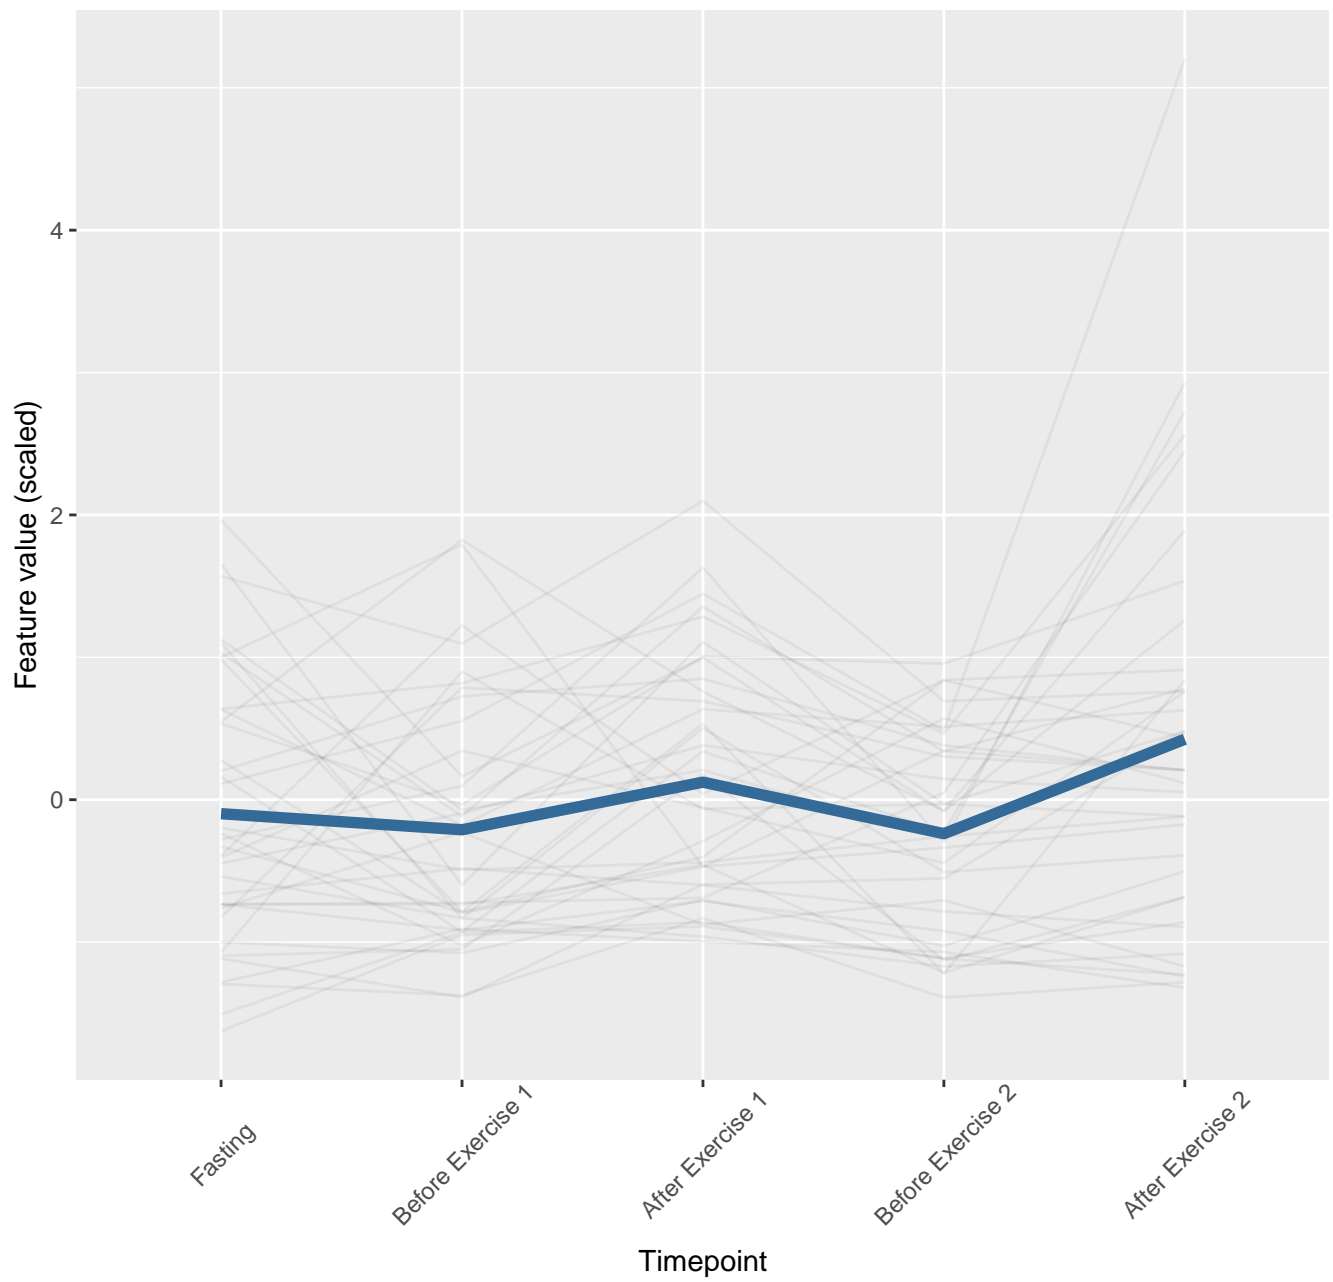

Line plot of PC(37:1)

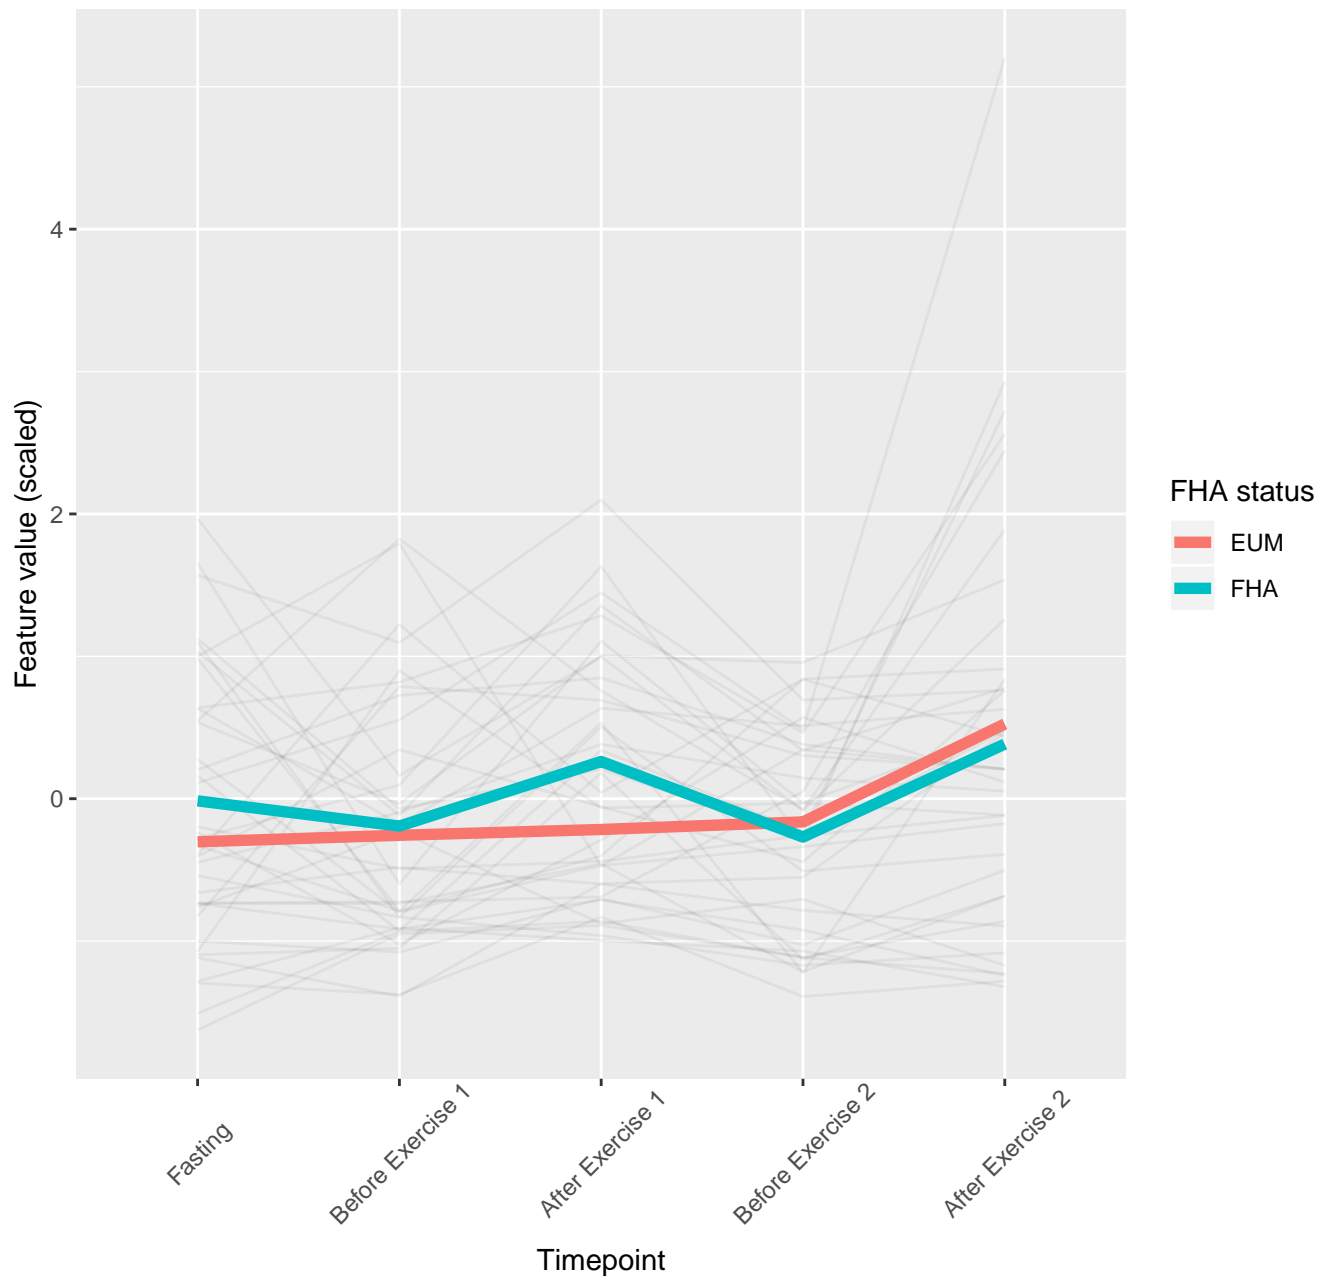

Line plot of PC(37:1)

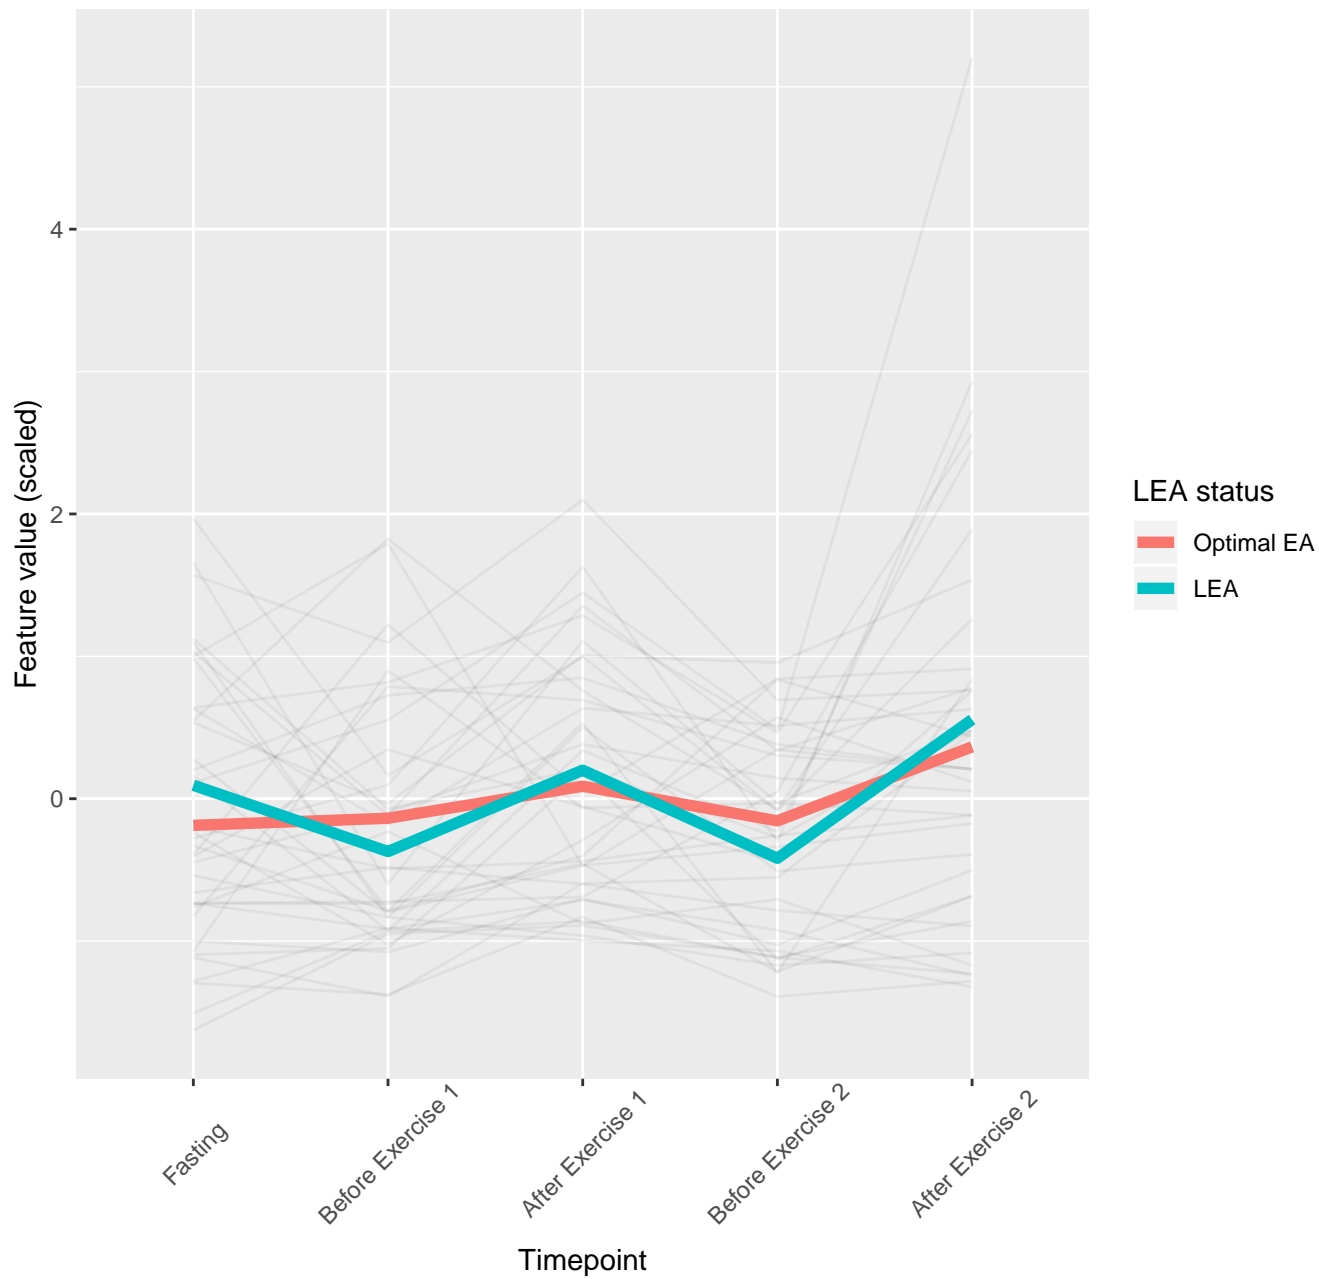



Line plot of PC(37:2)

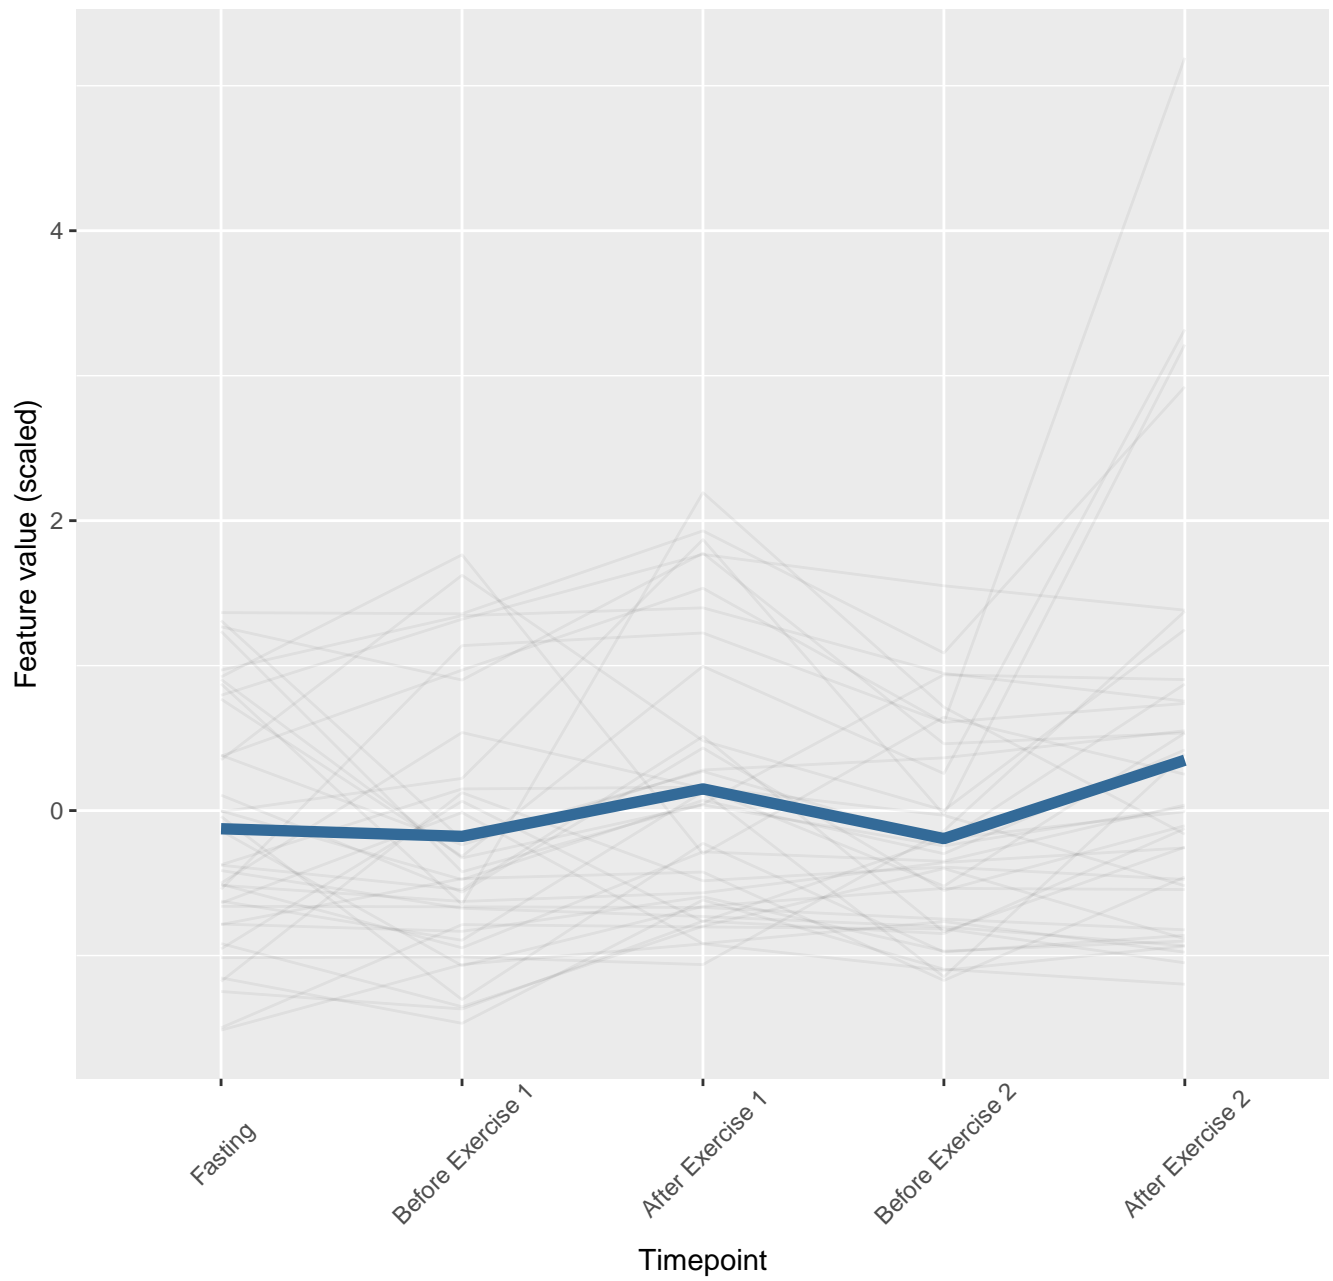

Line plot of PC(37:2)

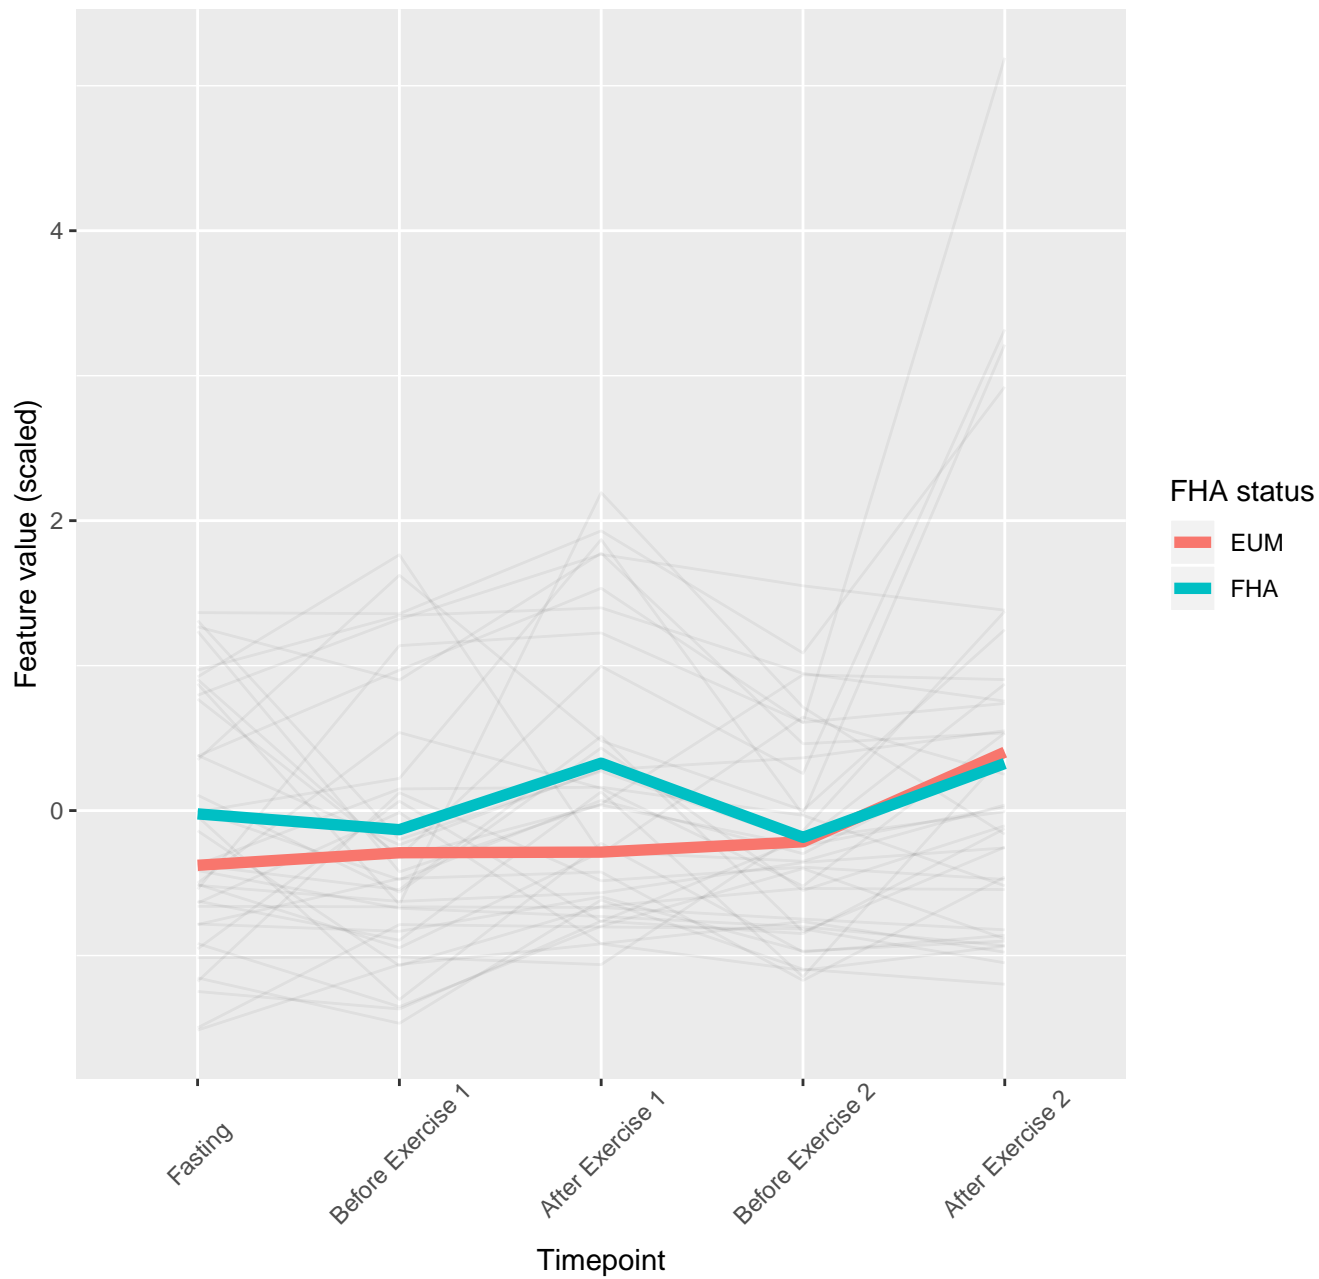

Line plot of PC(37:2)

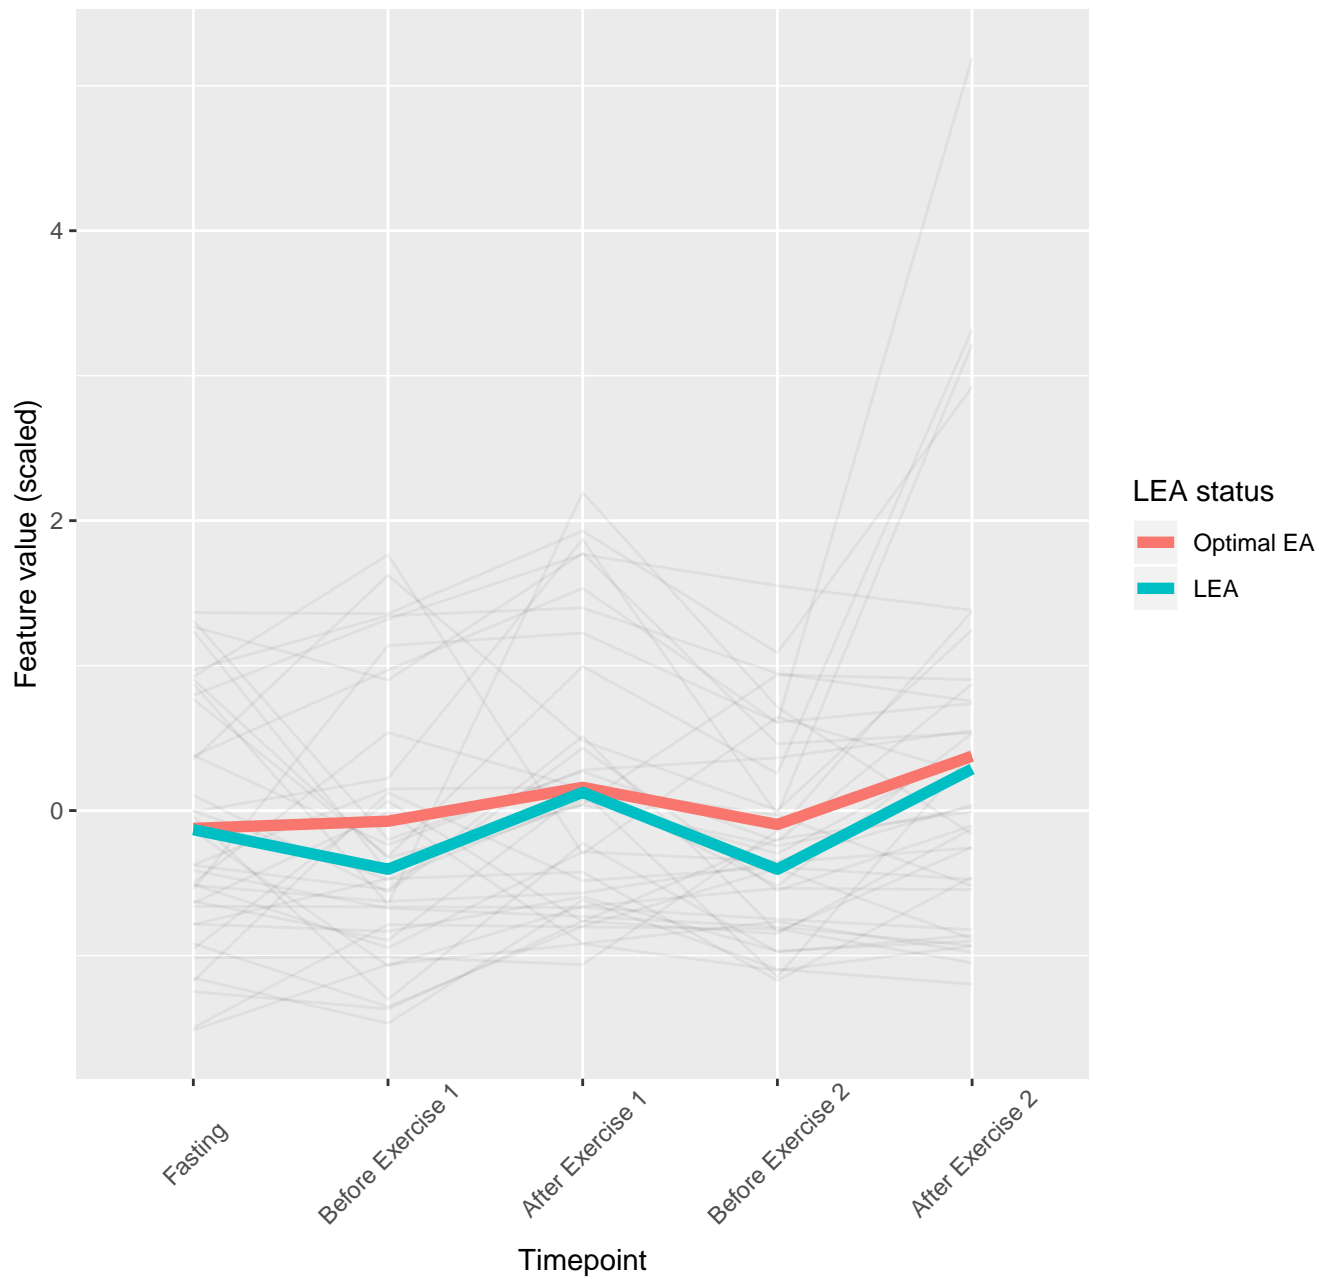

Line plot of PC(37:3)

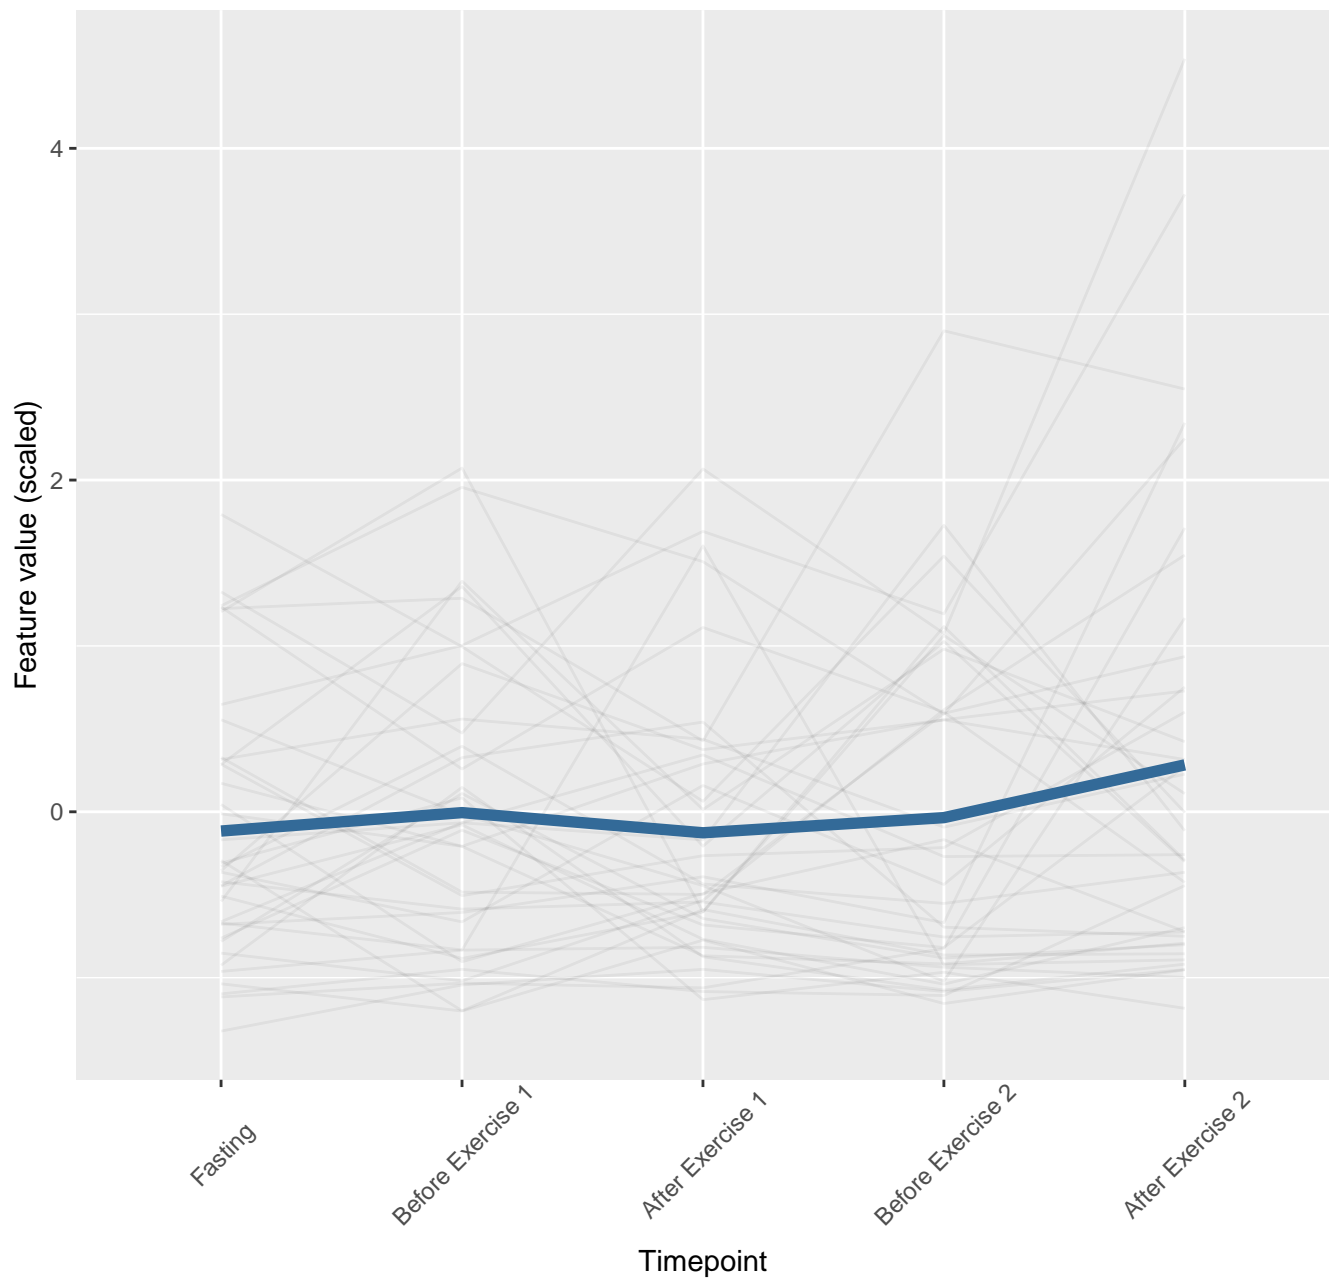

Line plot of PC(37:3)

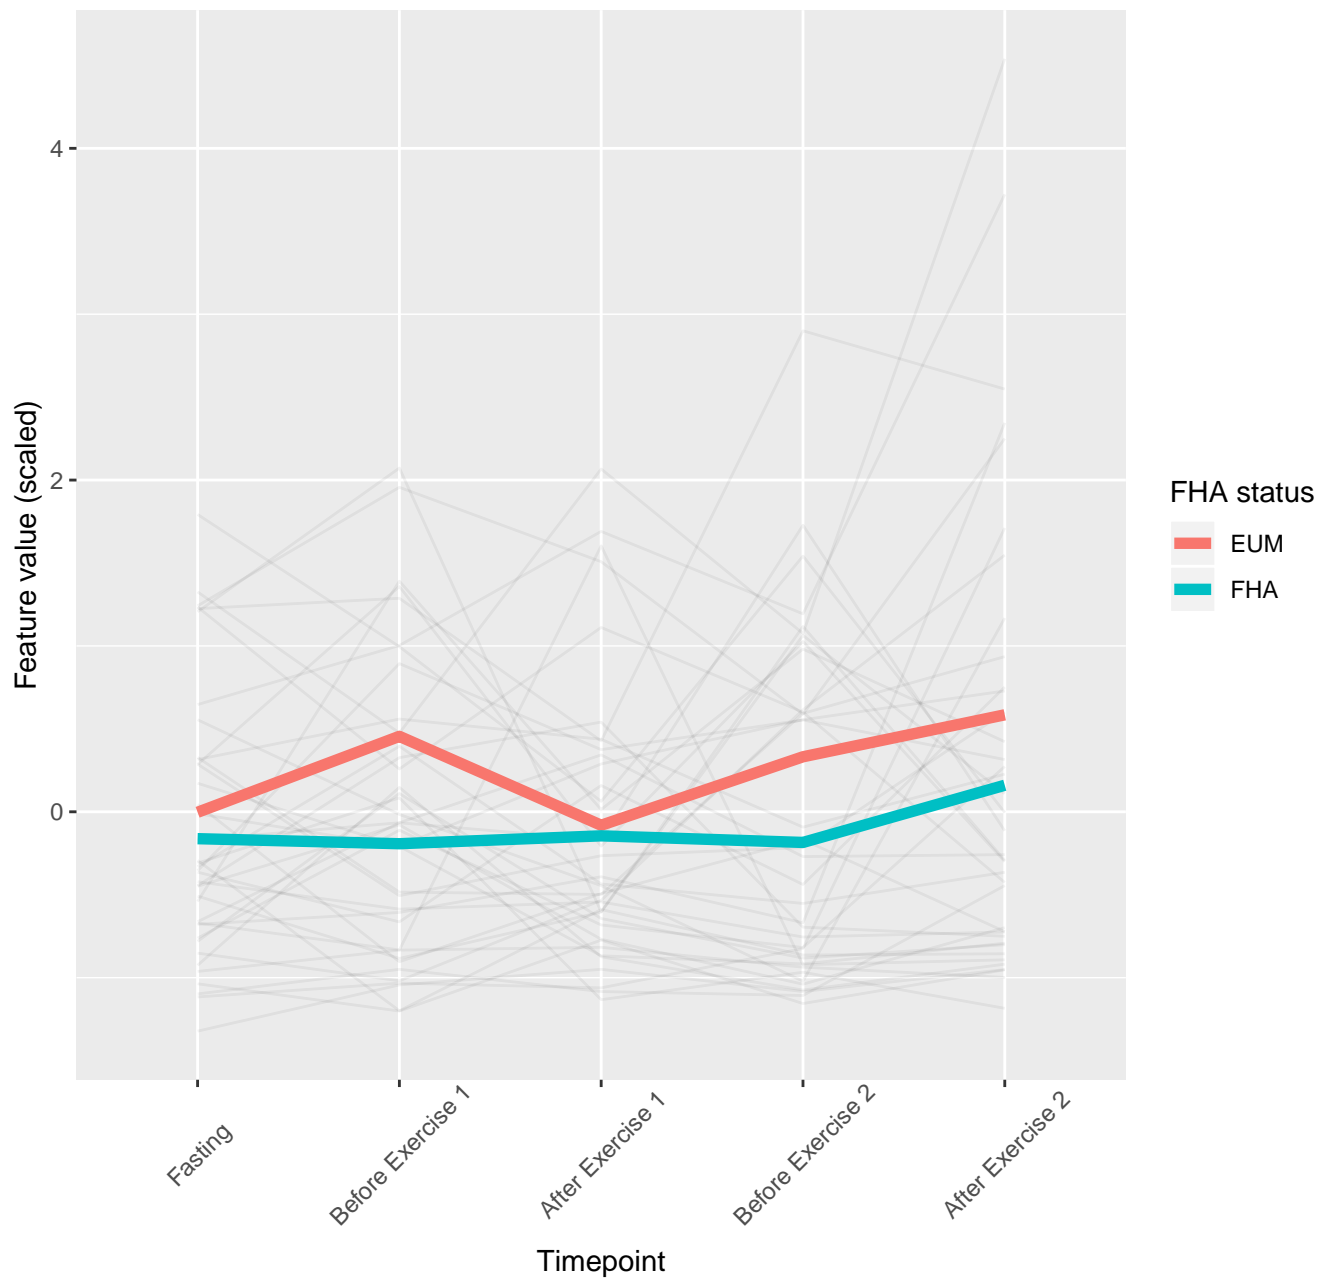

Line plot of PC(37:3)

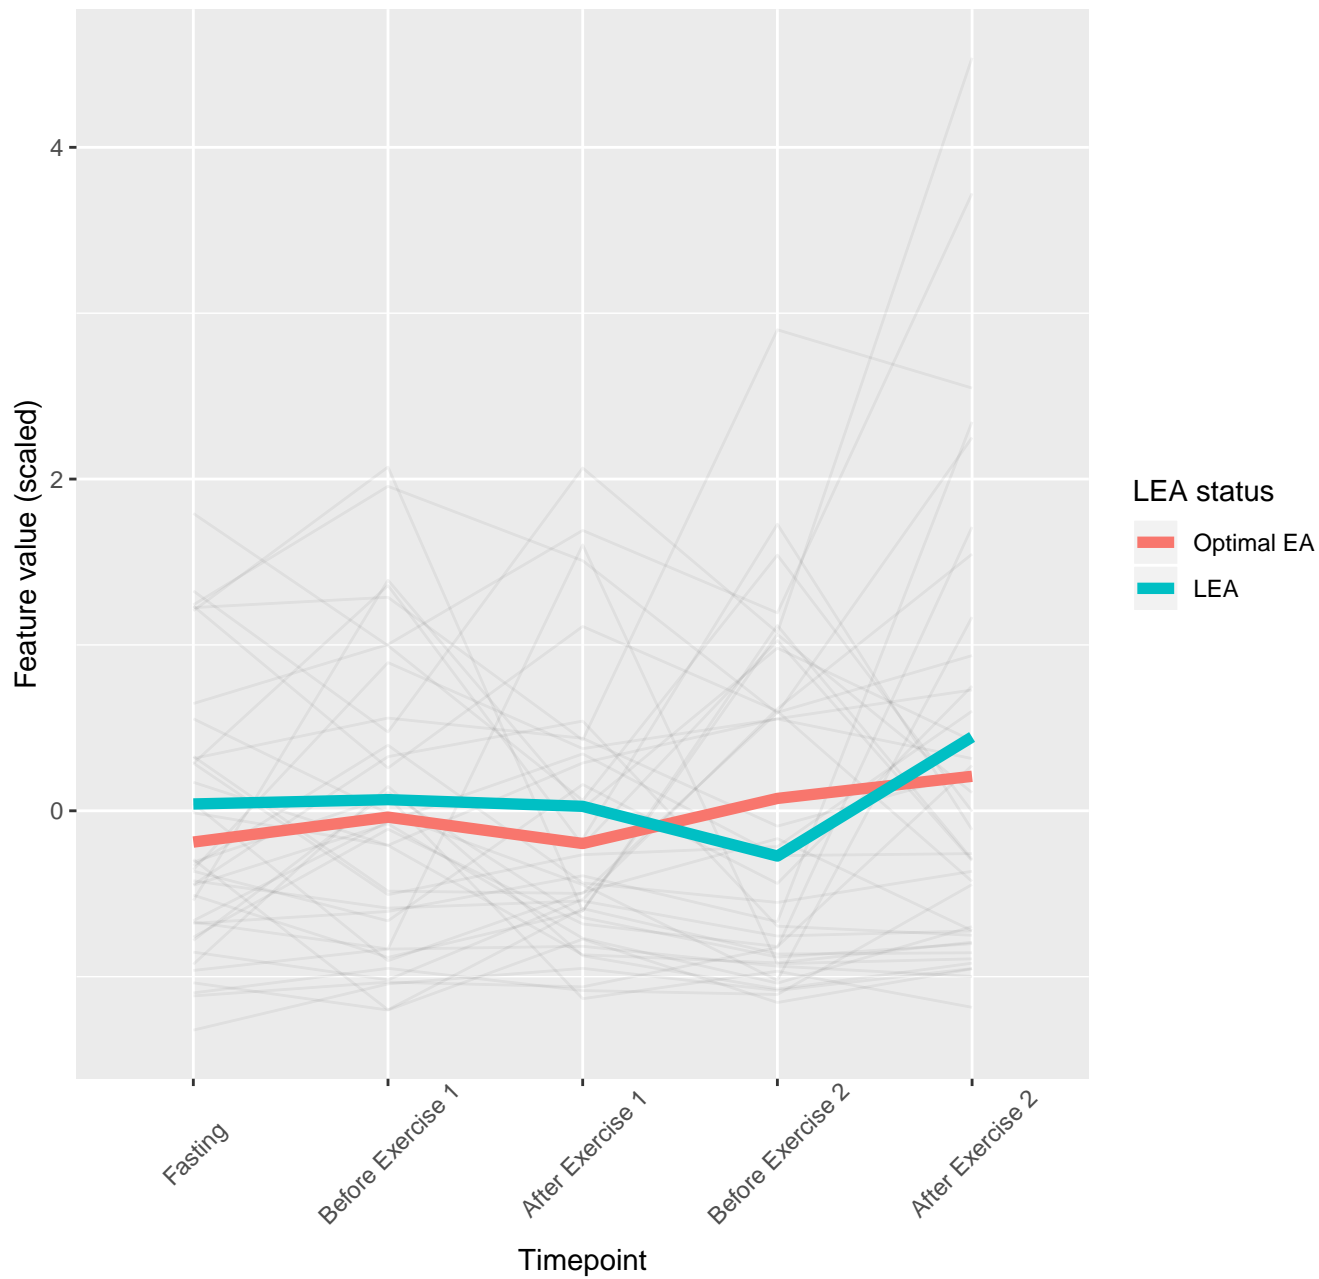

Line plot of PC(37:4)

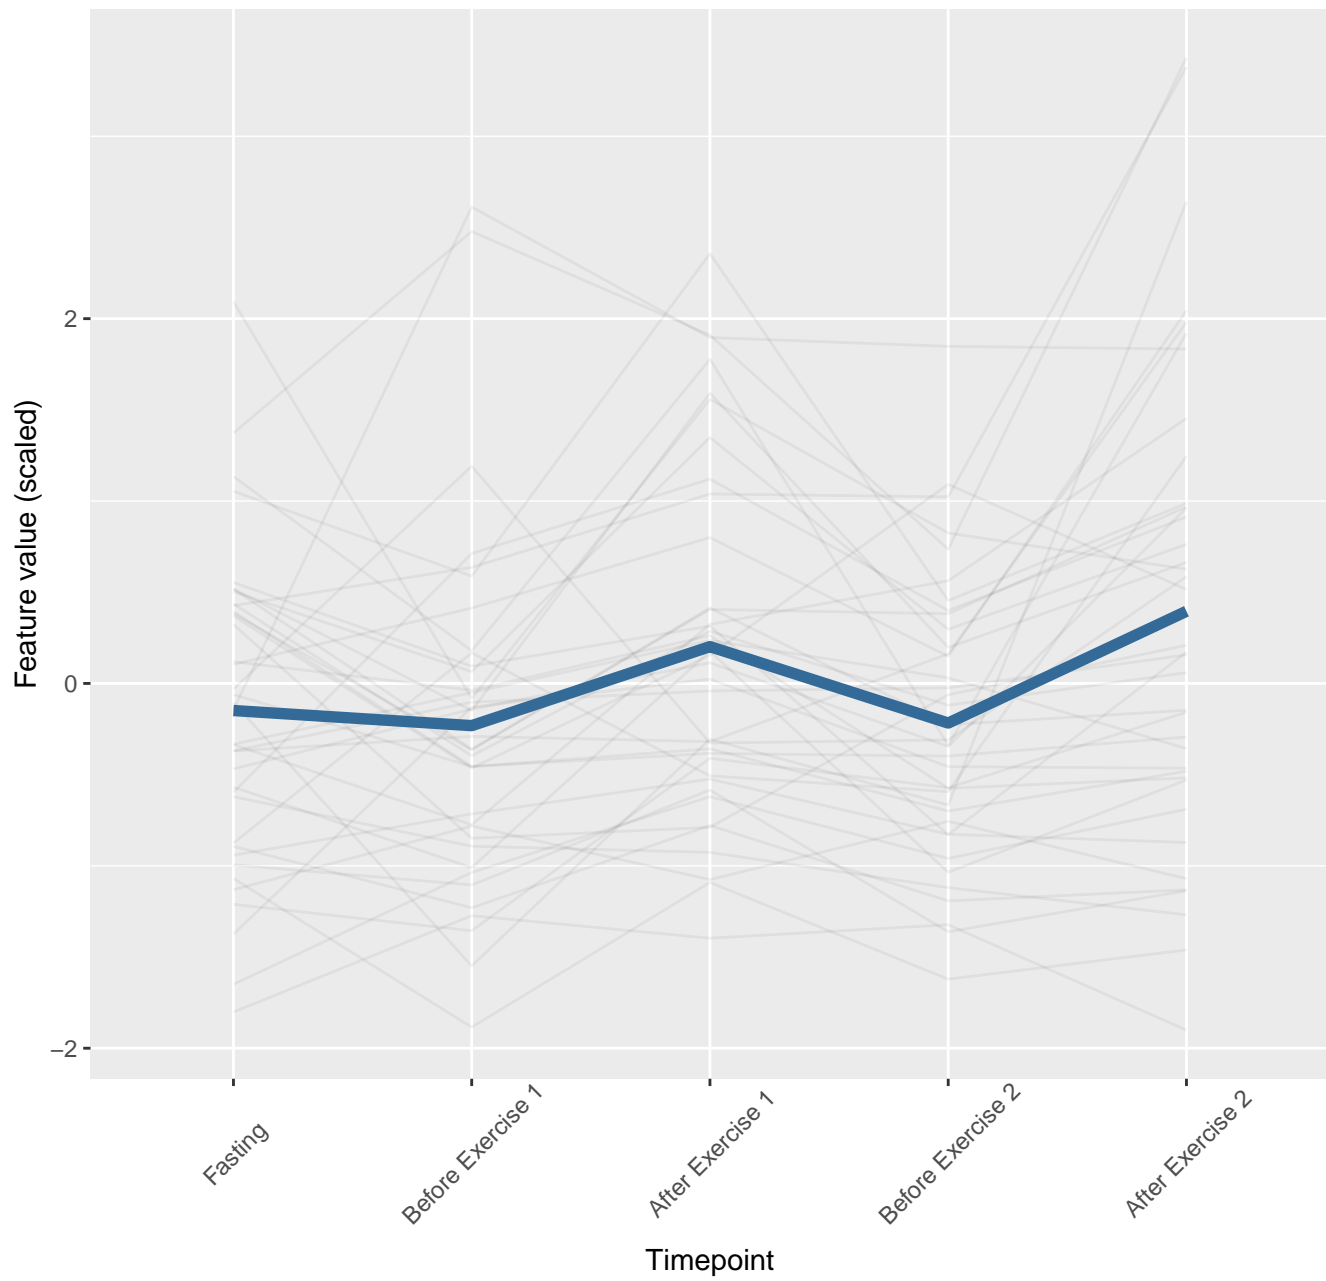

Line plot of PC(37:4)

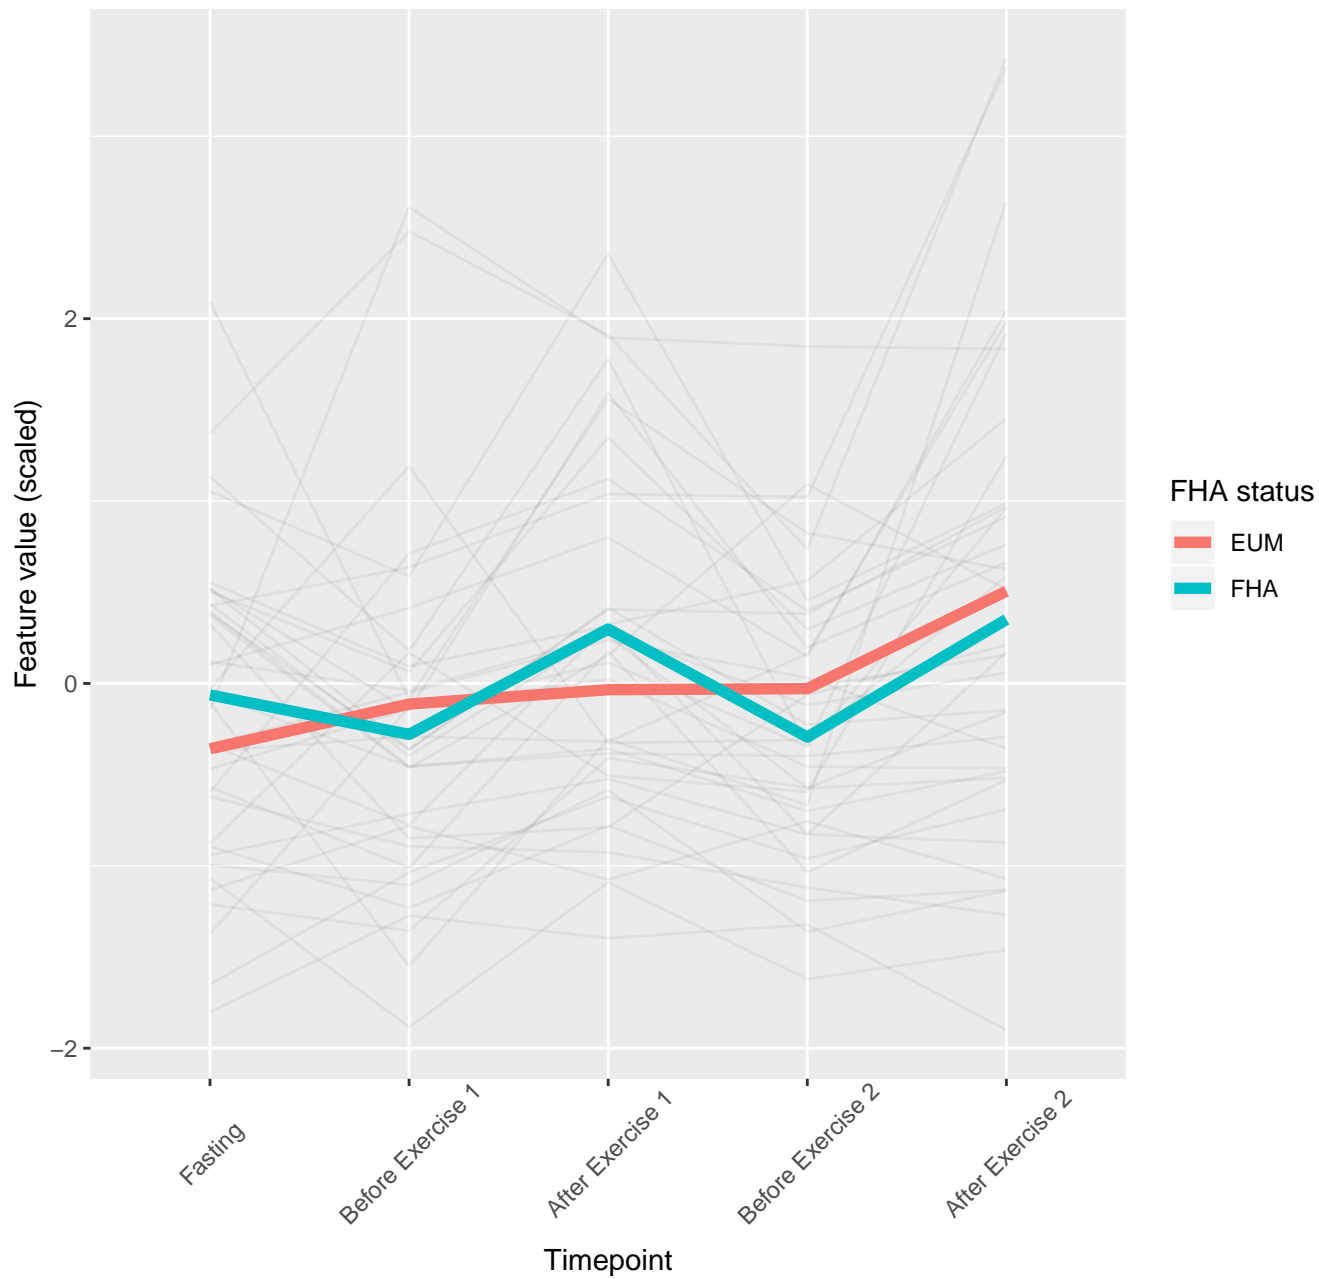



Line plot of PC(37:4)

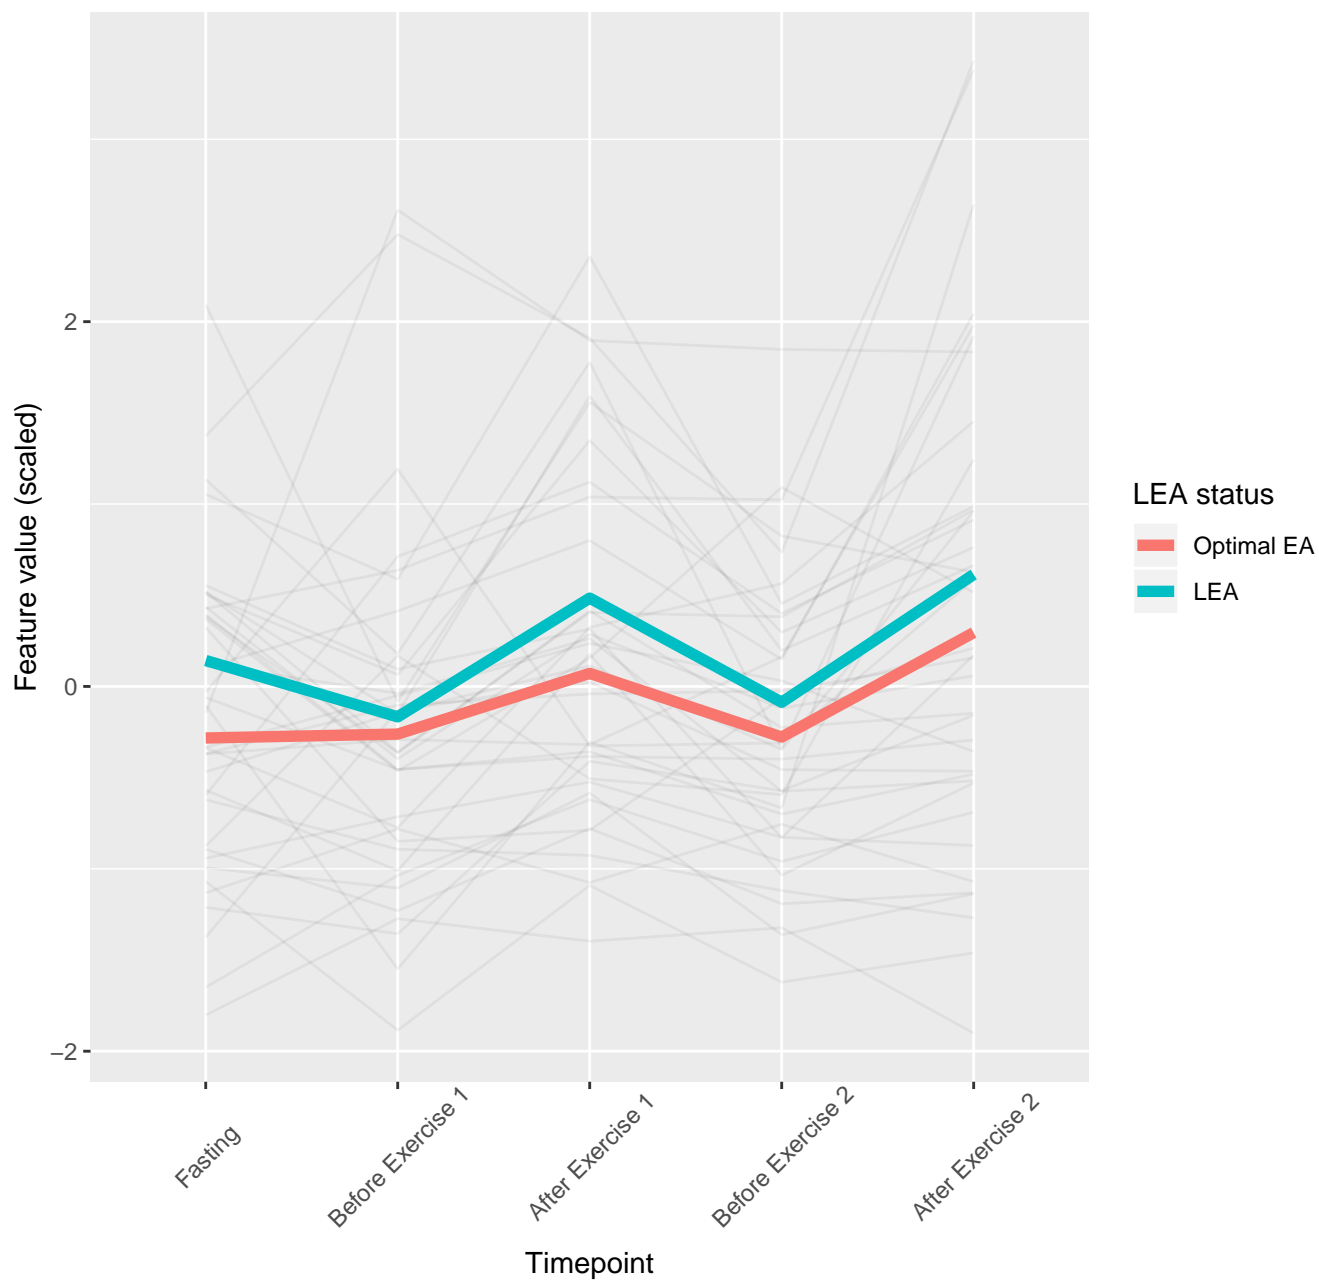

Line plot of PC(37:6)

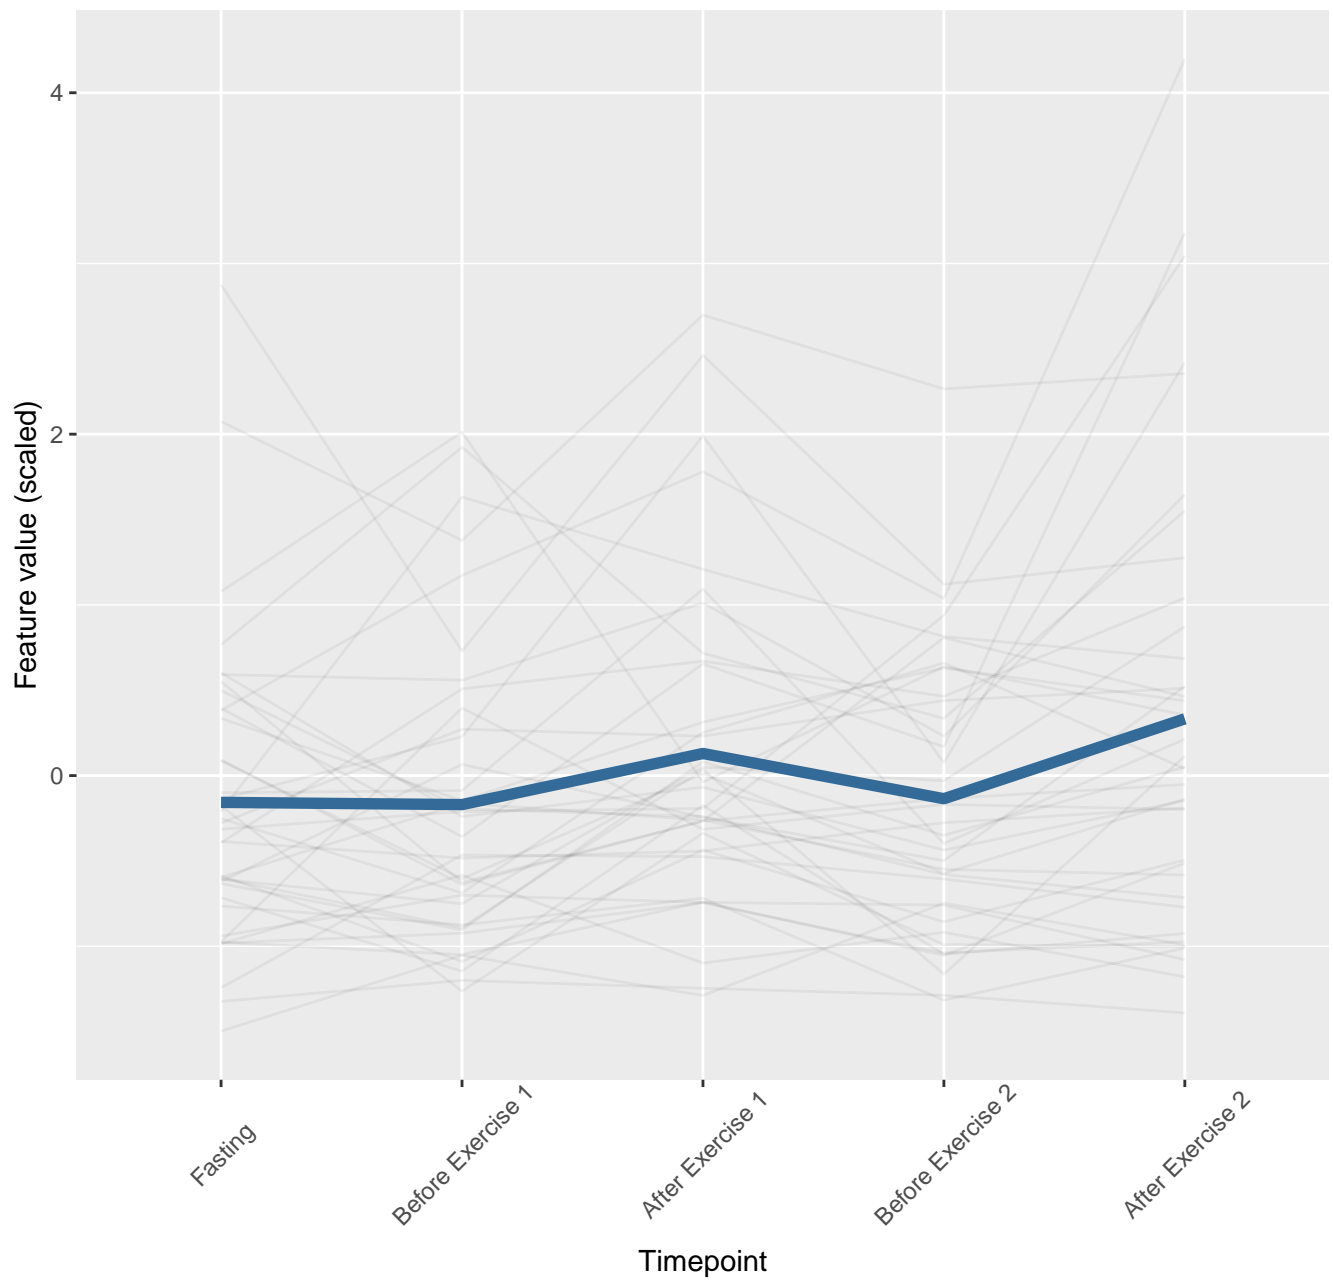

Line plot of PC(37:6)

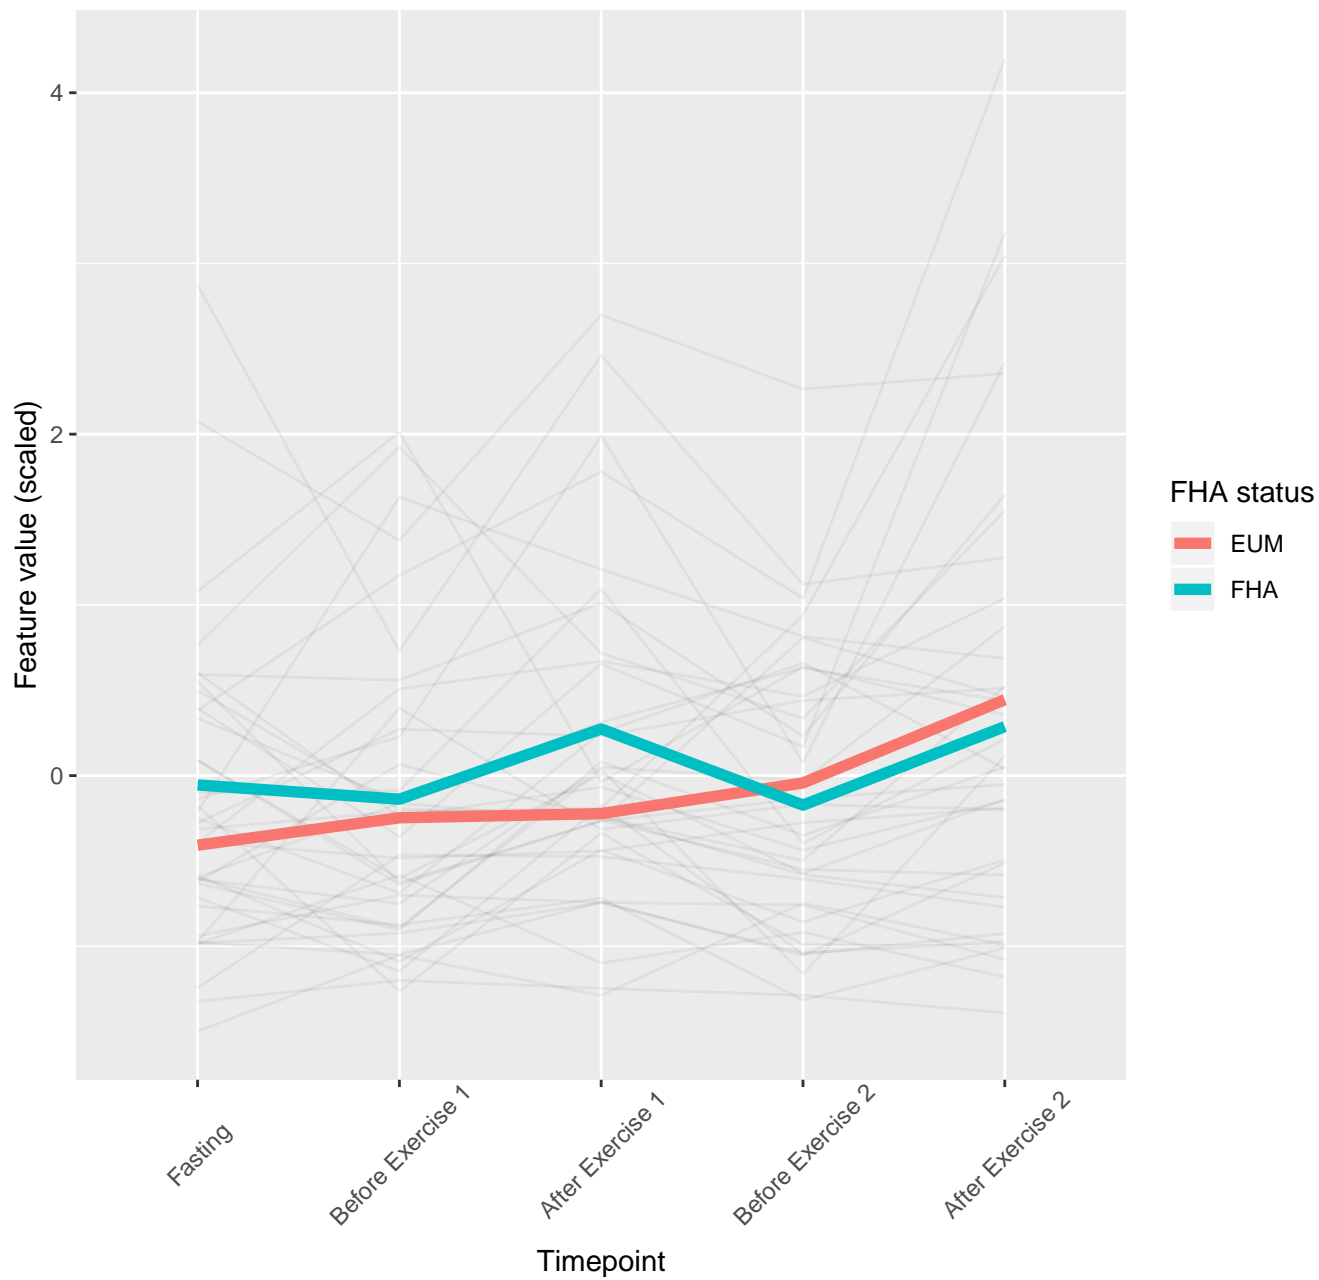

Line plot of PC(37:6)

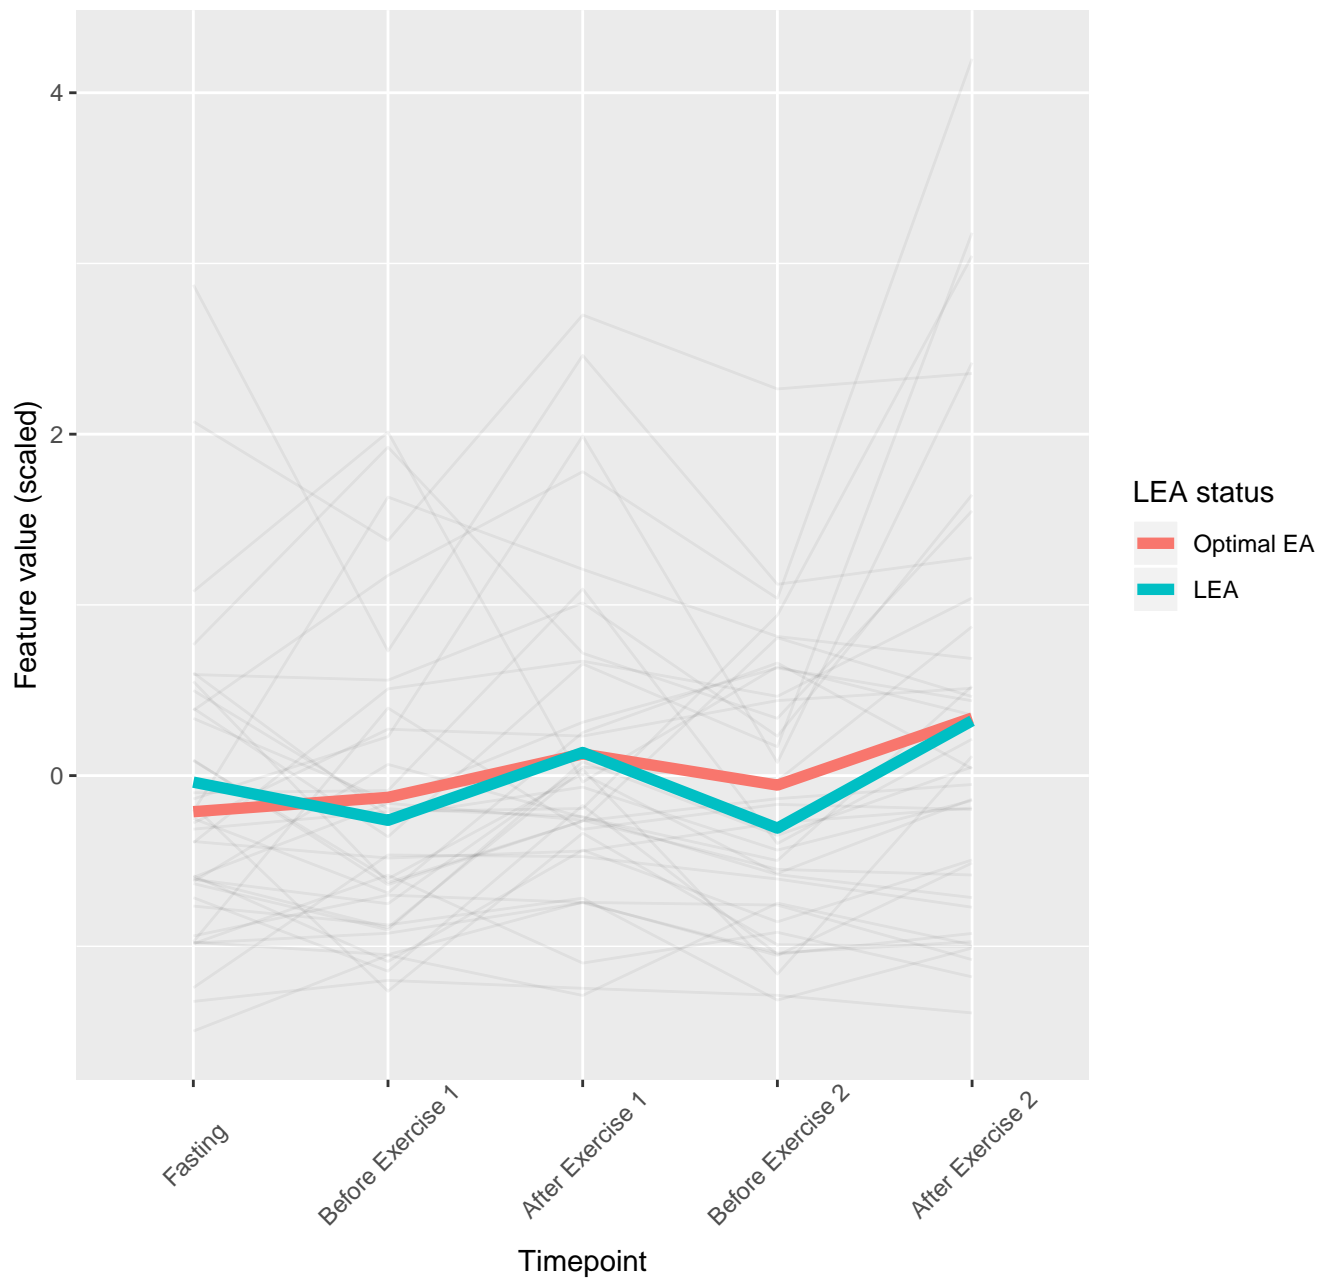

Line plot of PC(38:1)

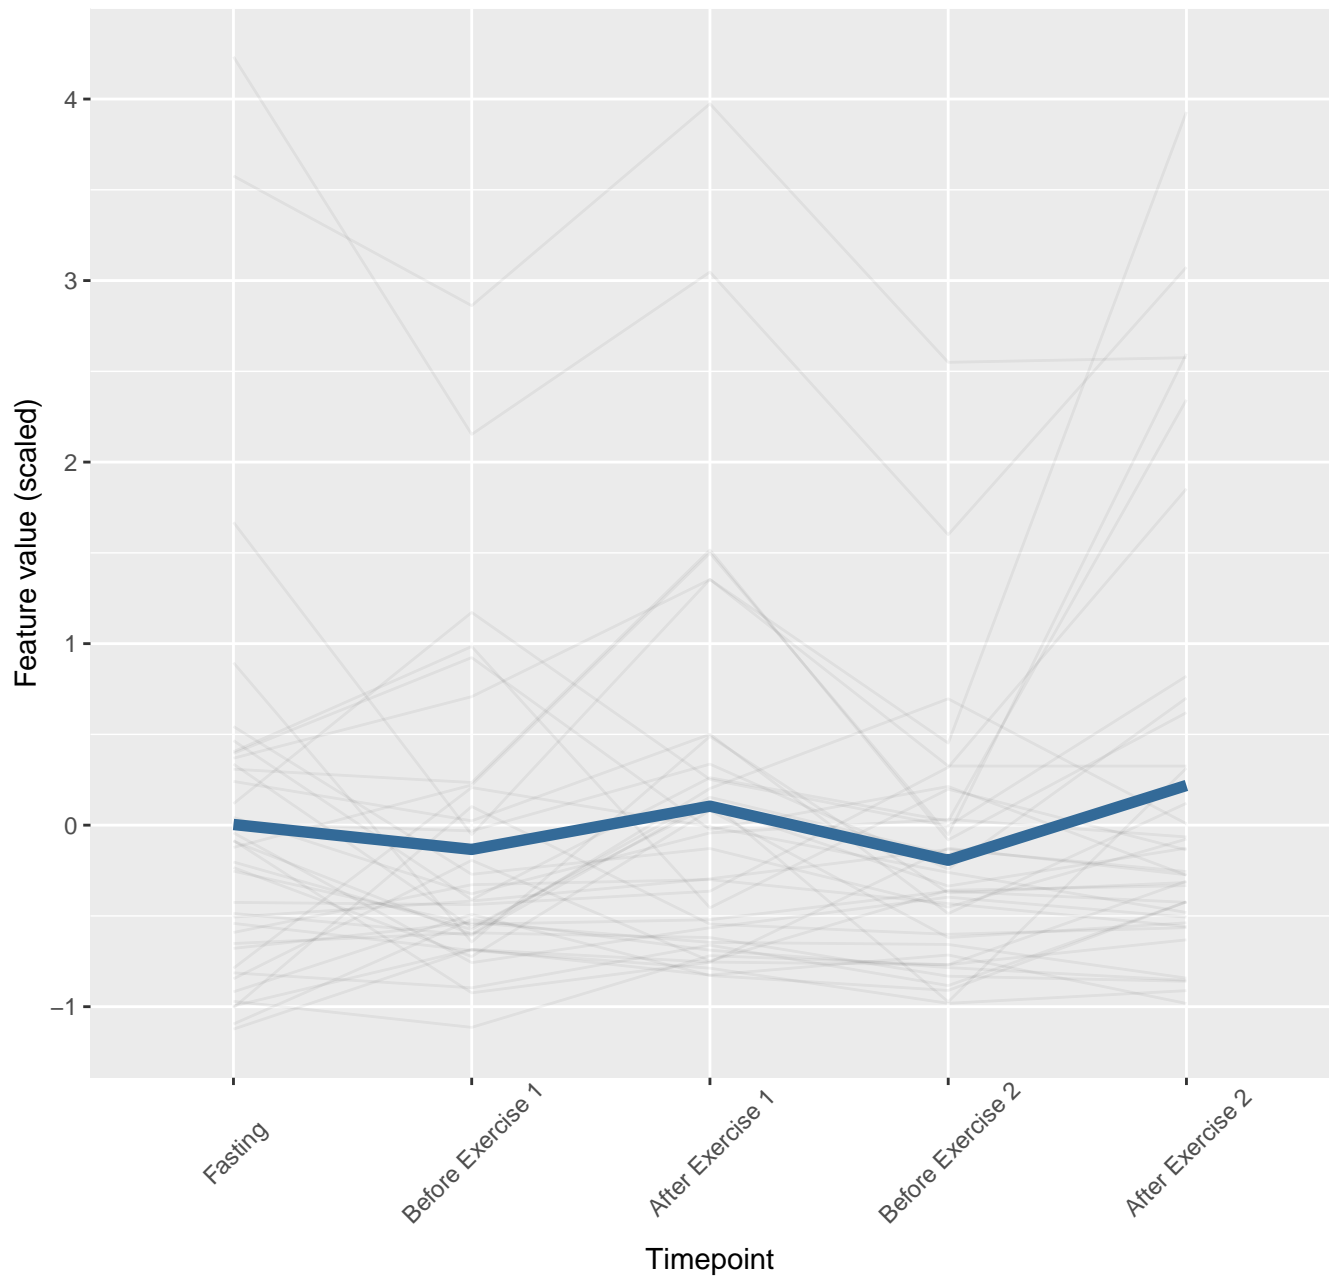

Line plot of PC(38:1)

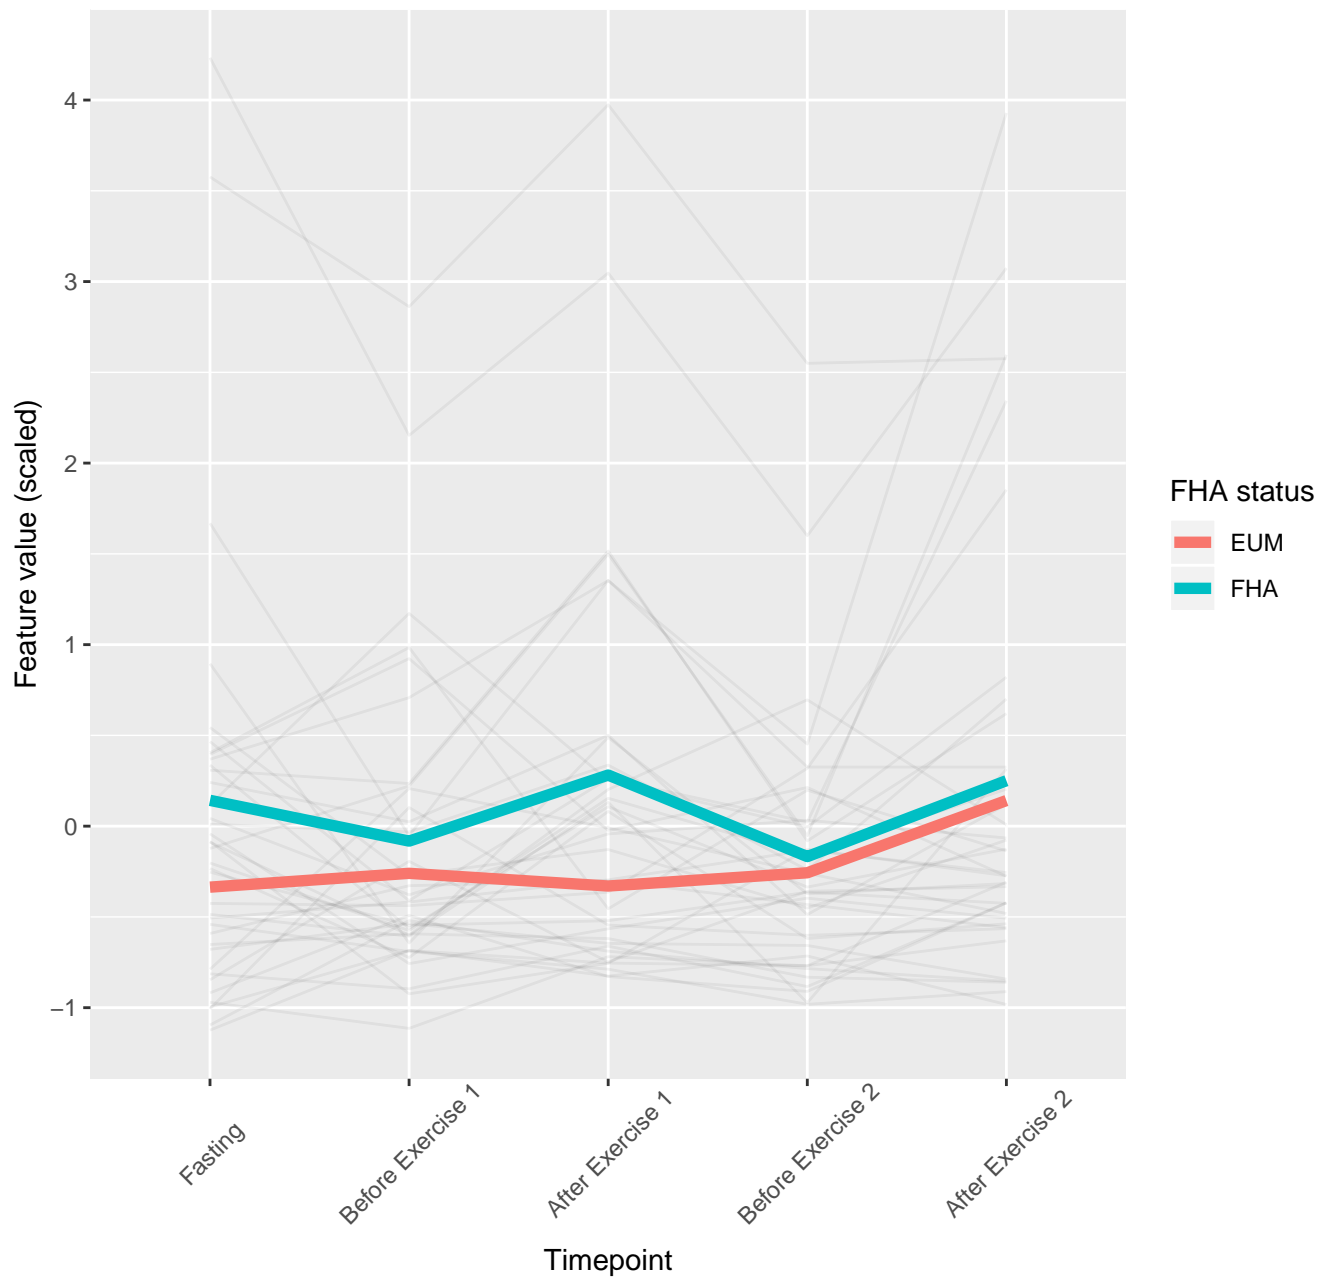

Line plot of PC(38:1)

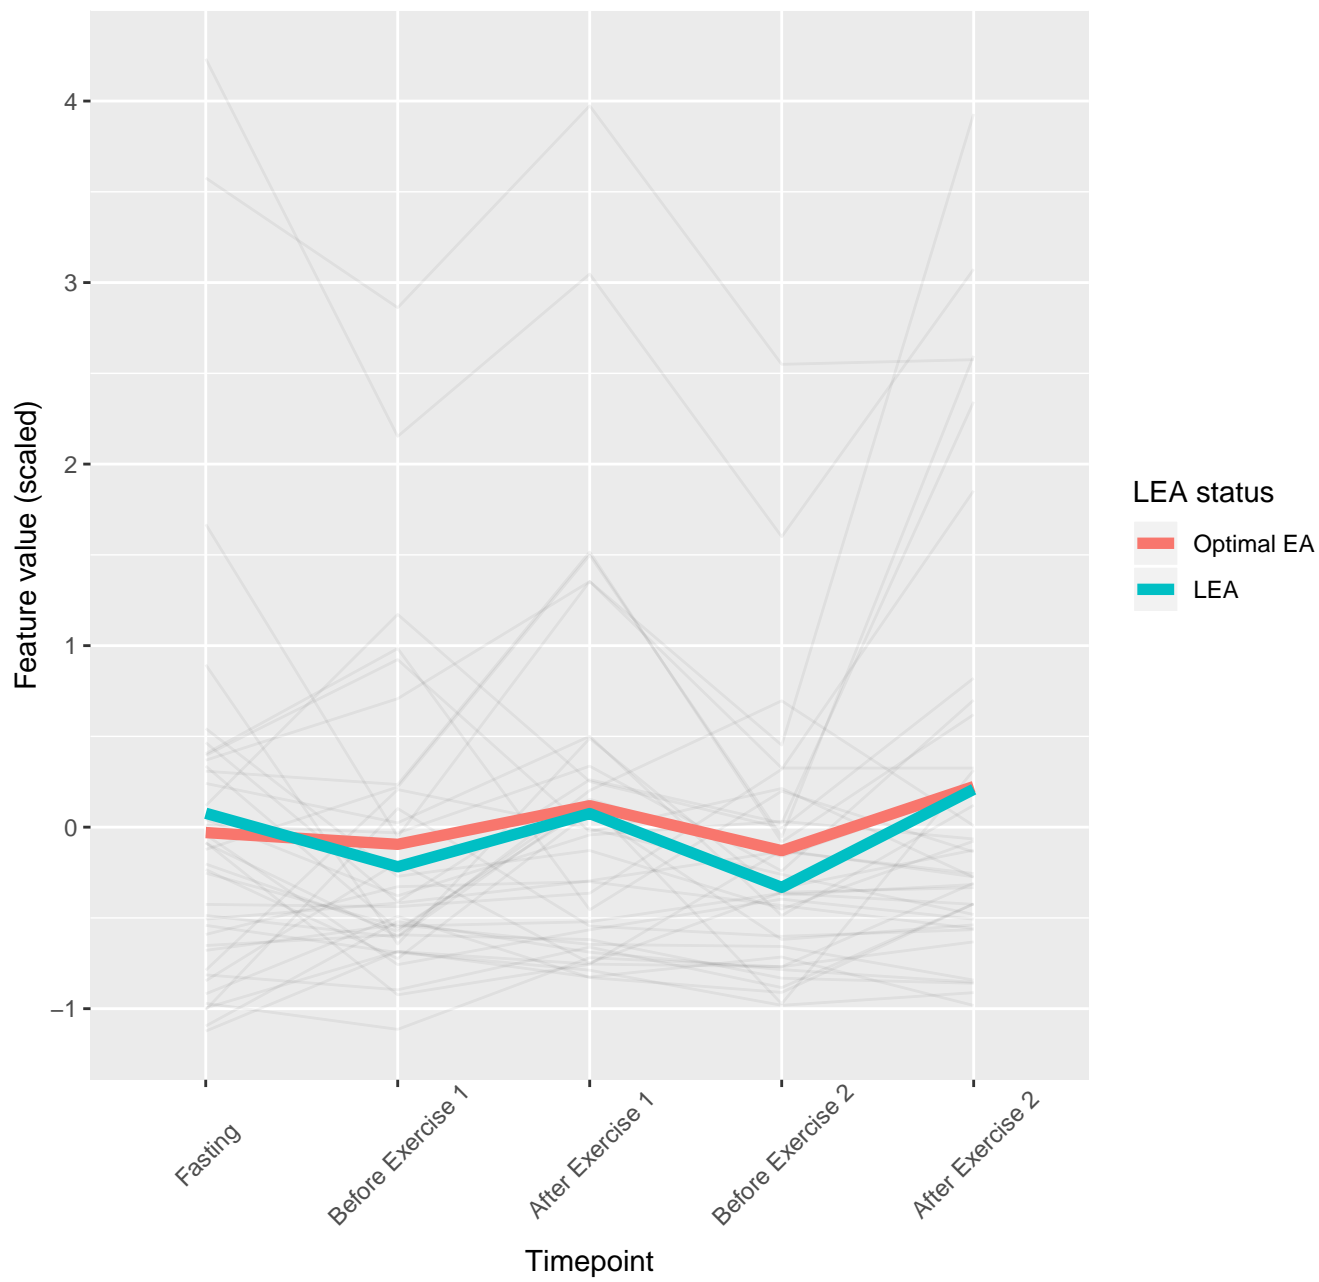

Line plot of PC(38:2)

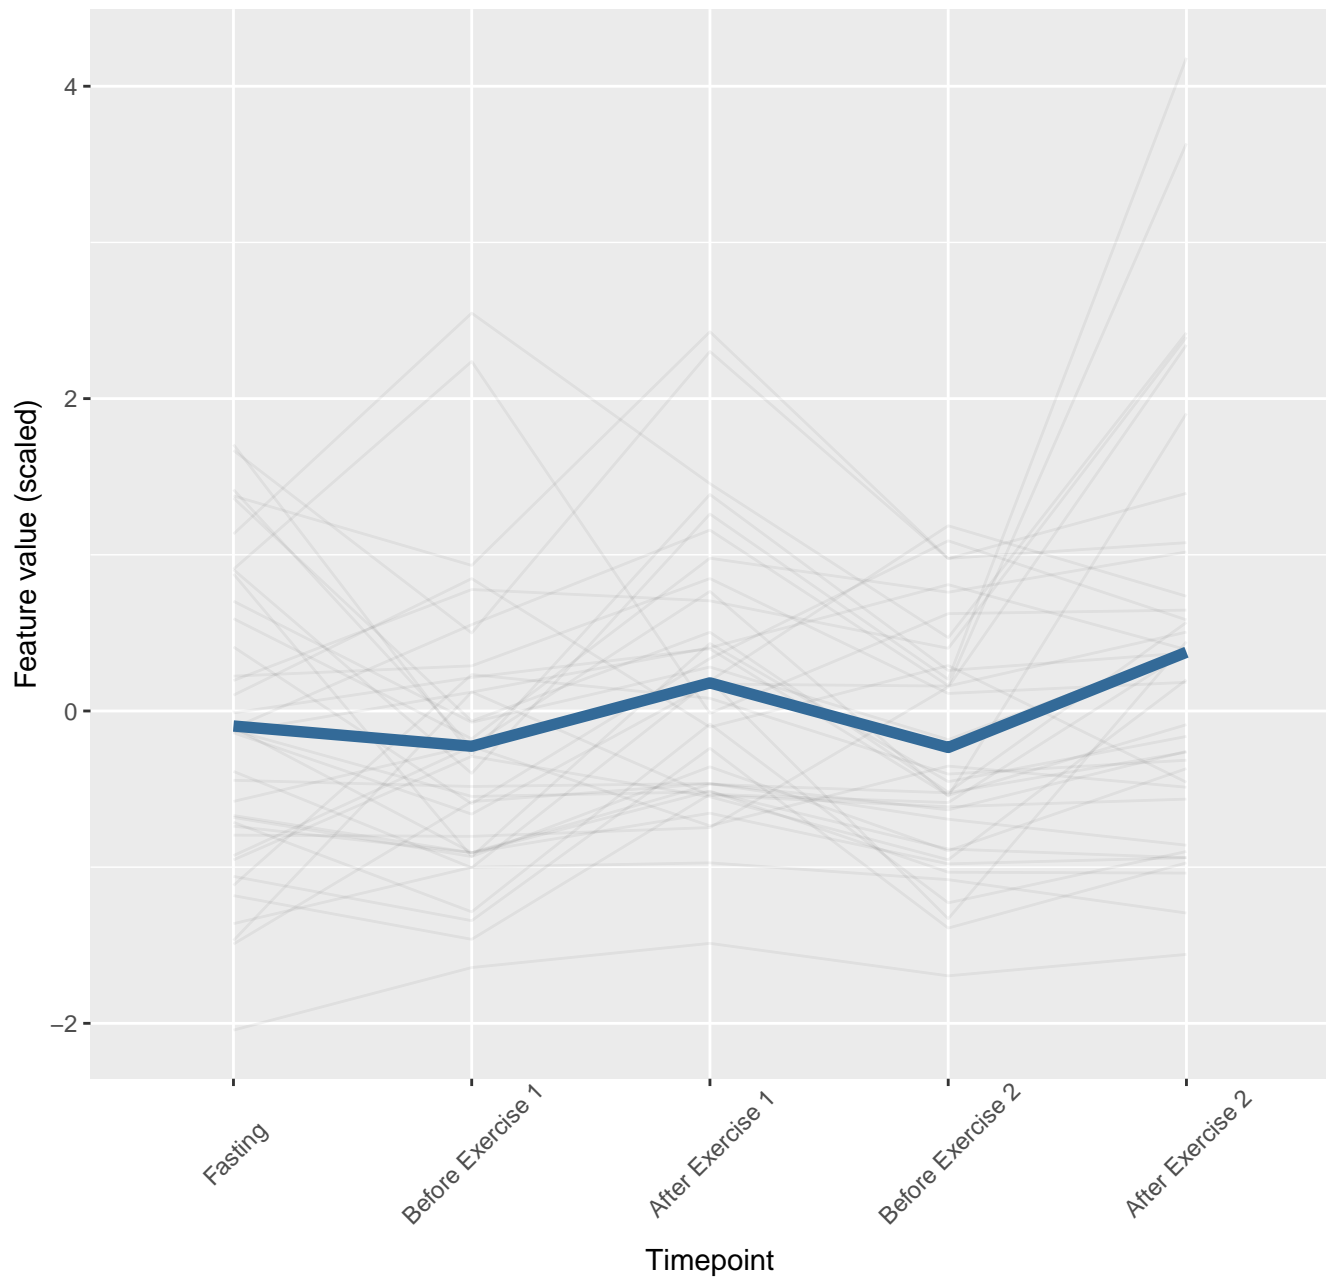



Line plot of PC(38:2)

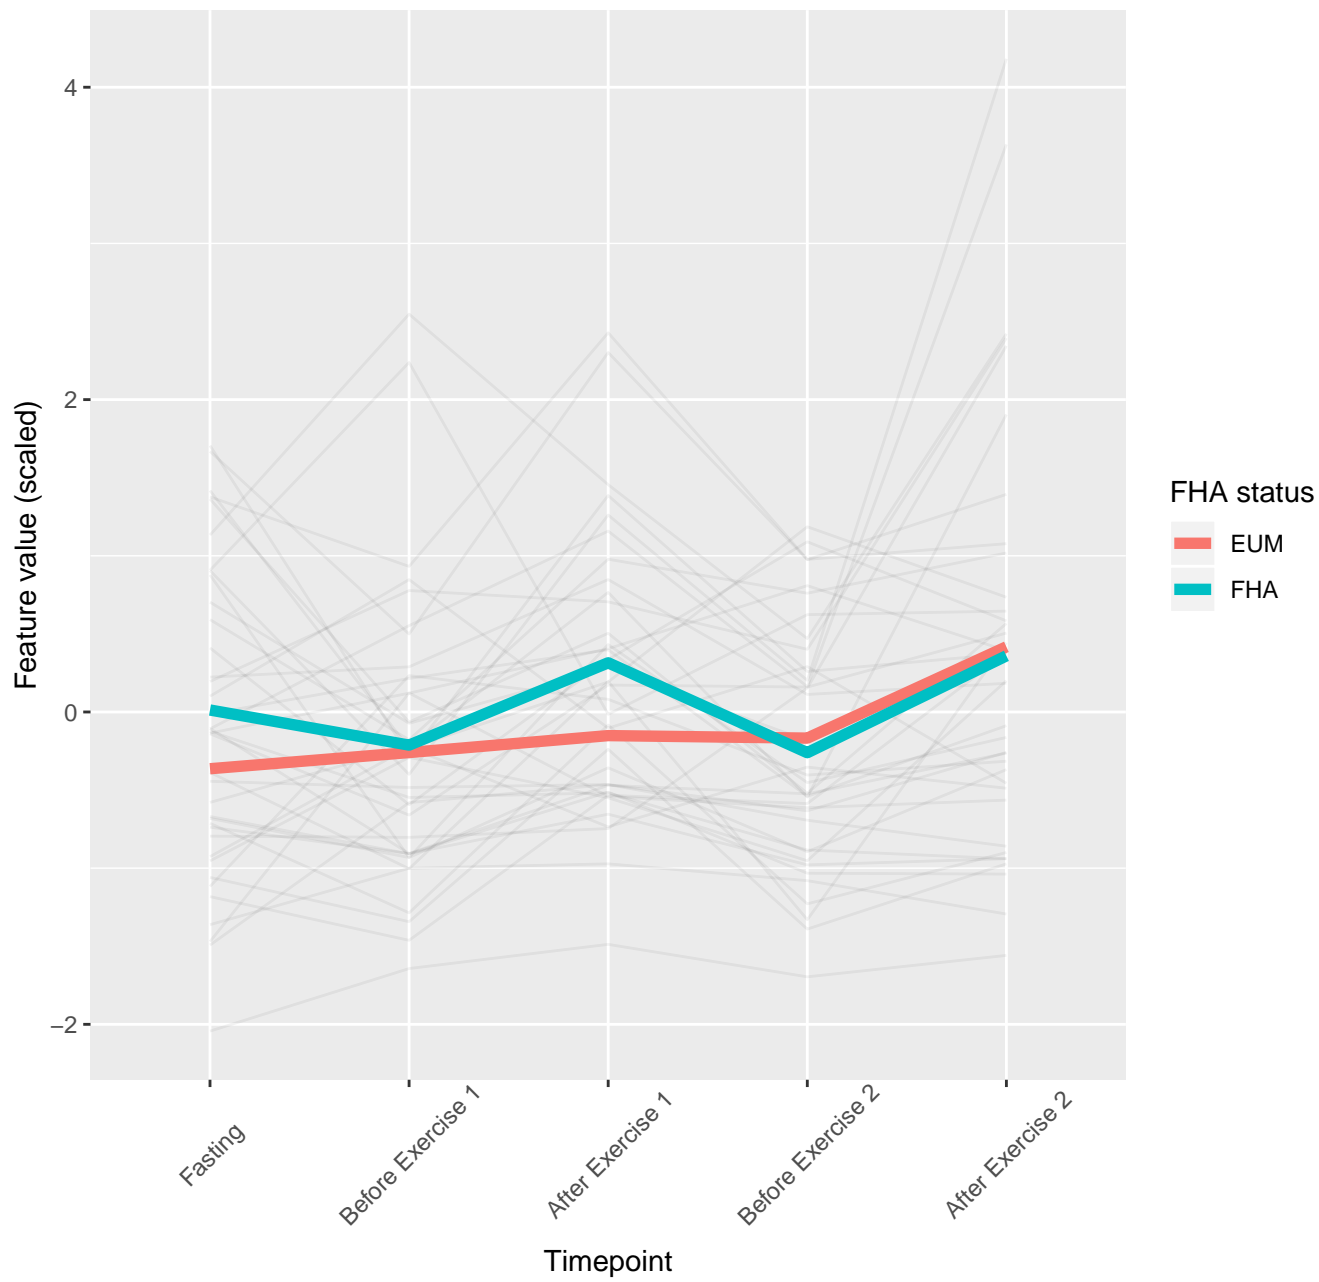

Line plot of PC(38:2)

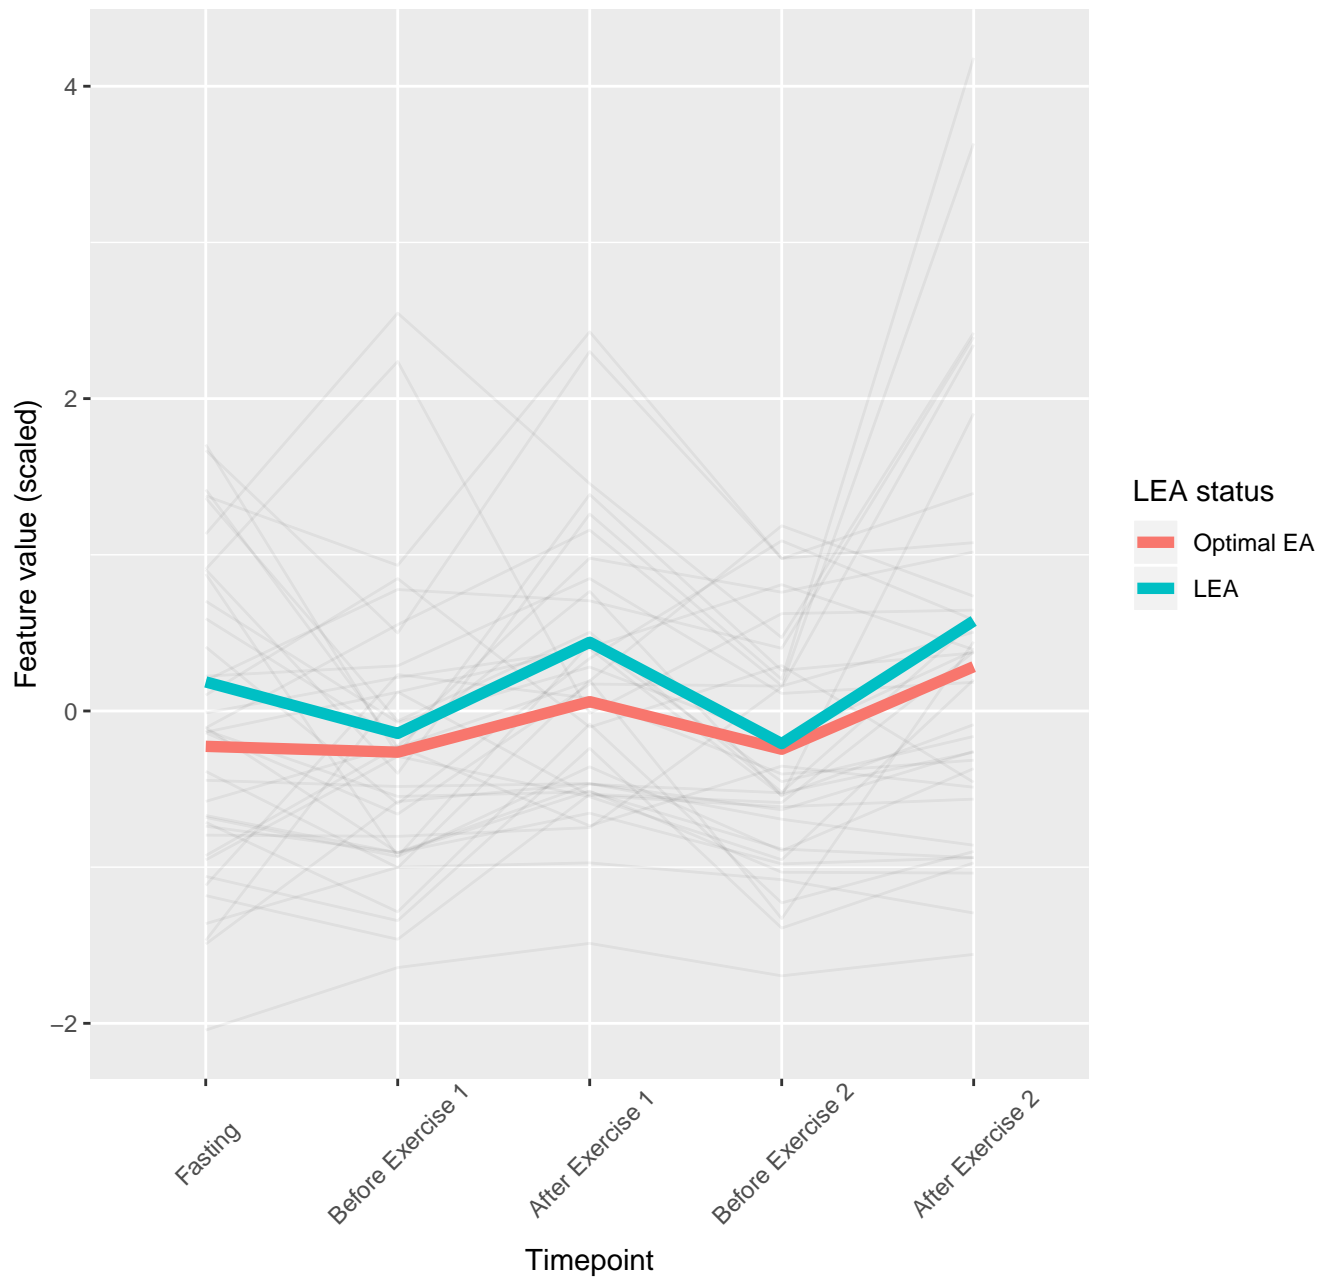

Line plot of PC(38:3)

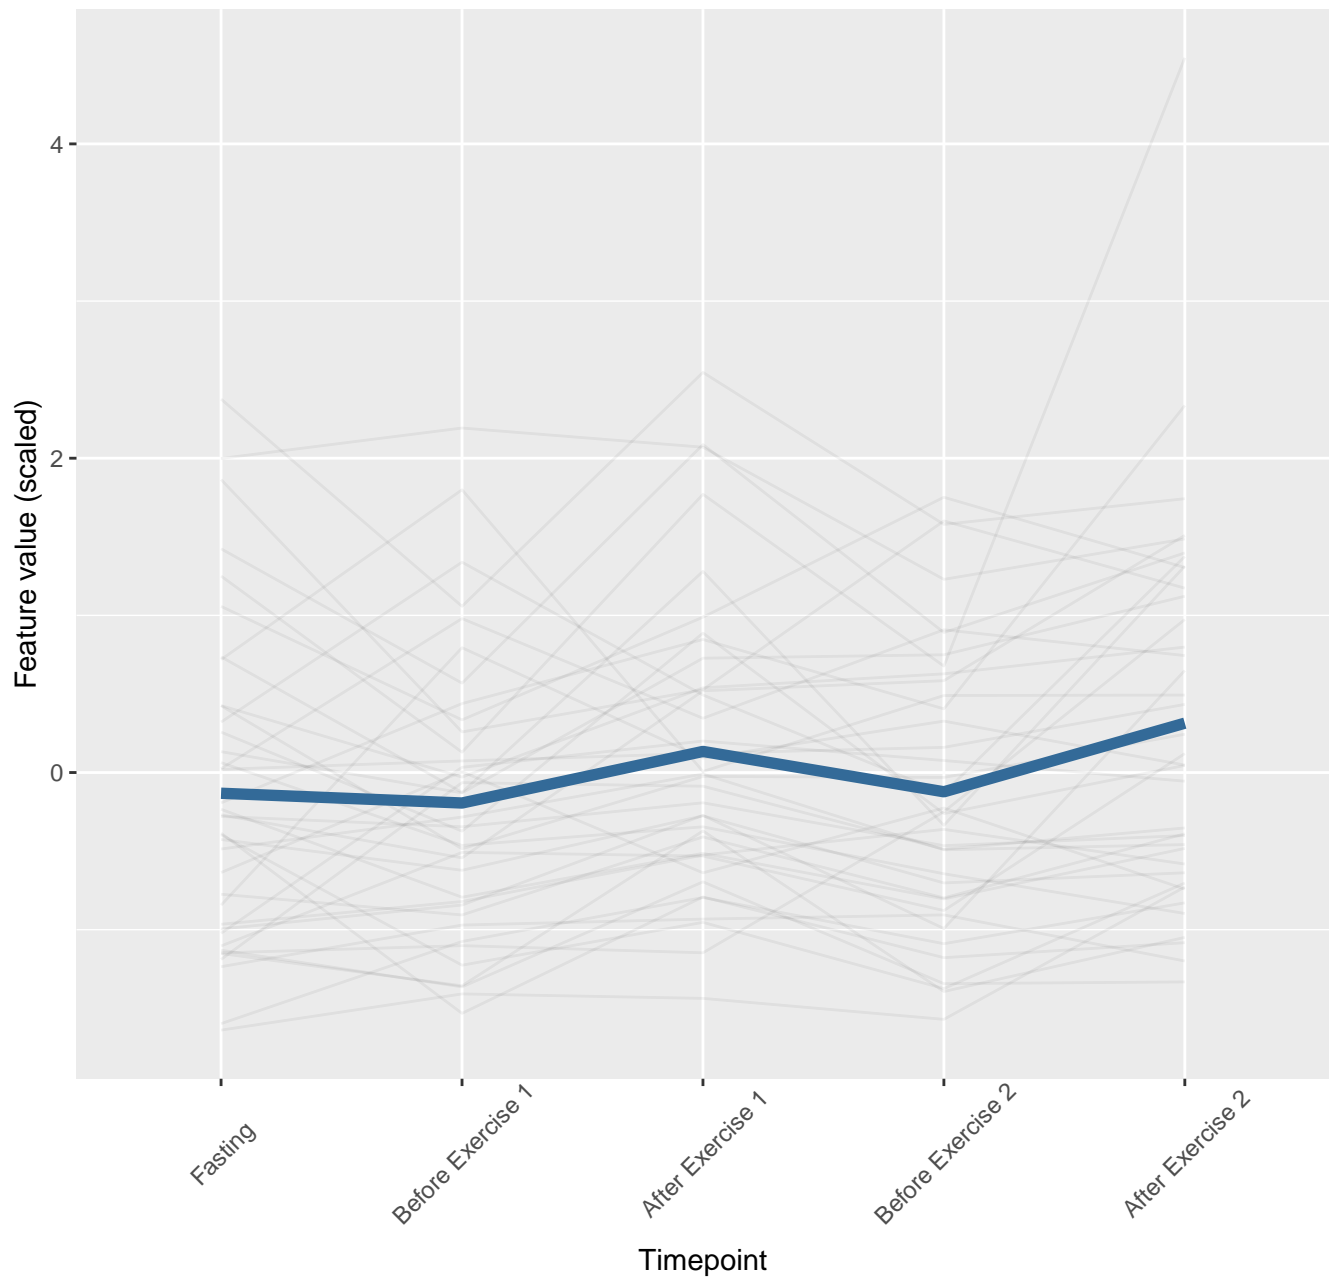

Line plot of PC(38:3)

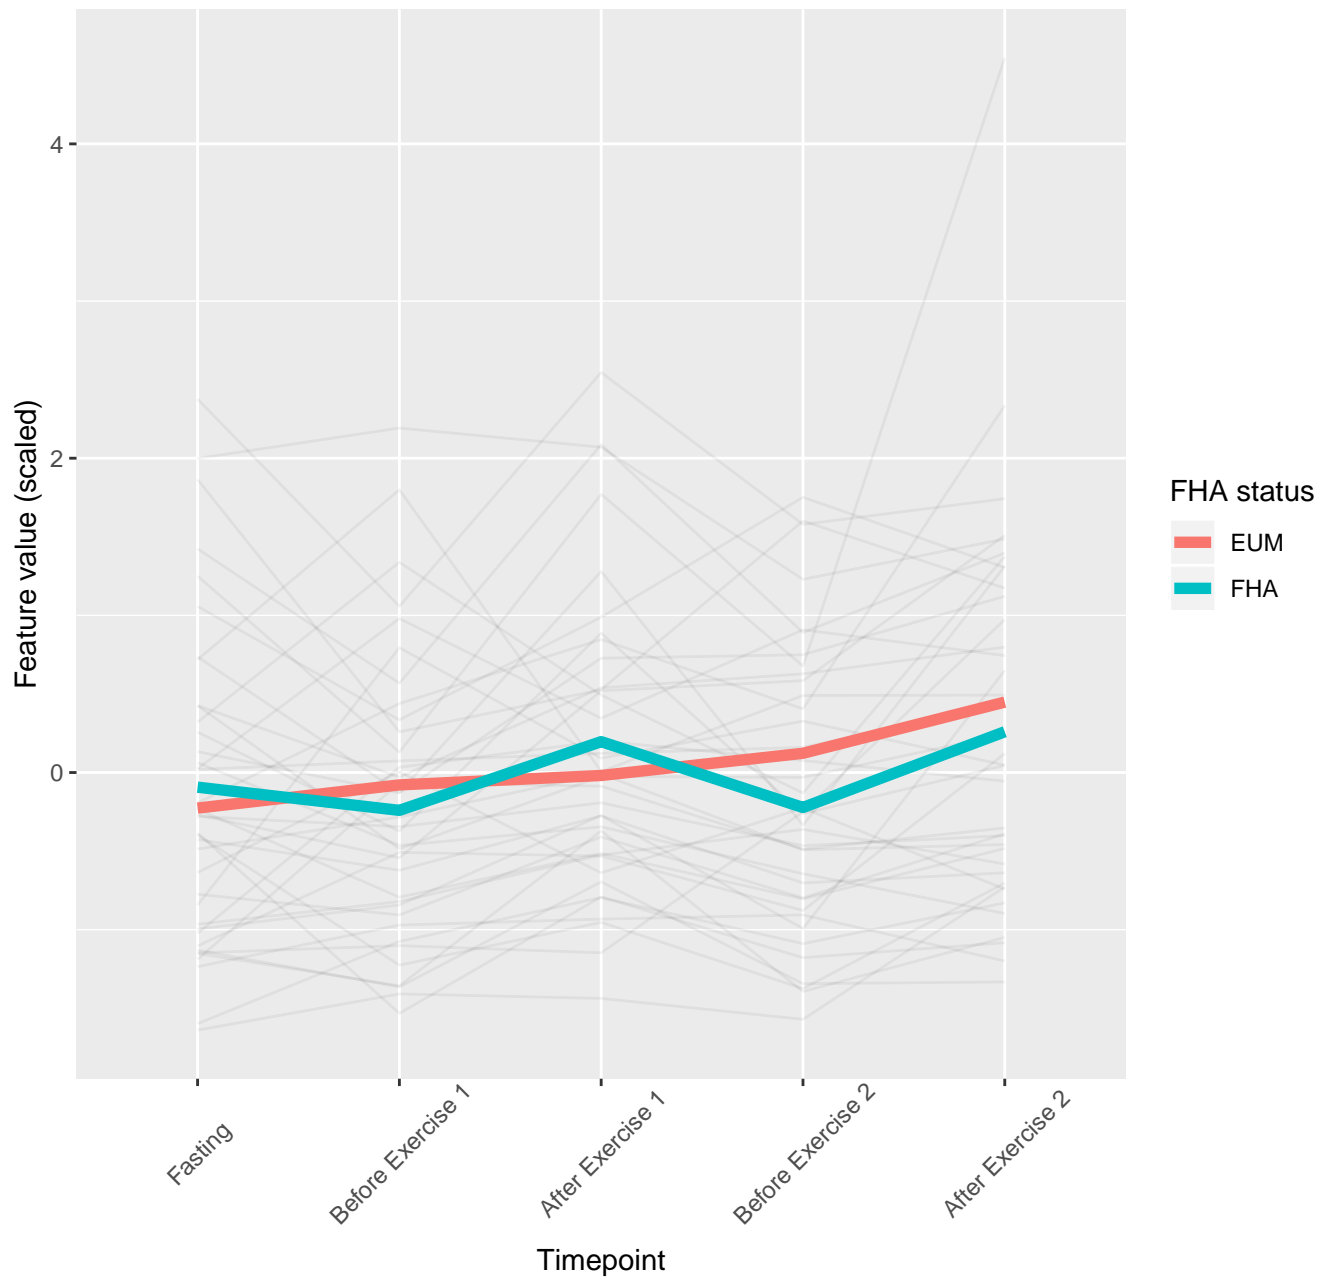

Line plot of PC(38:3)

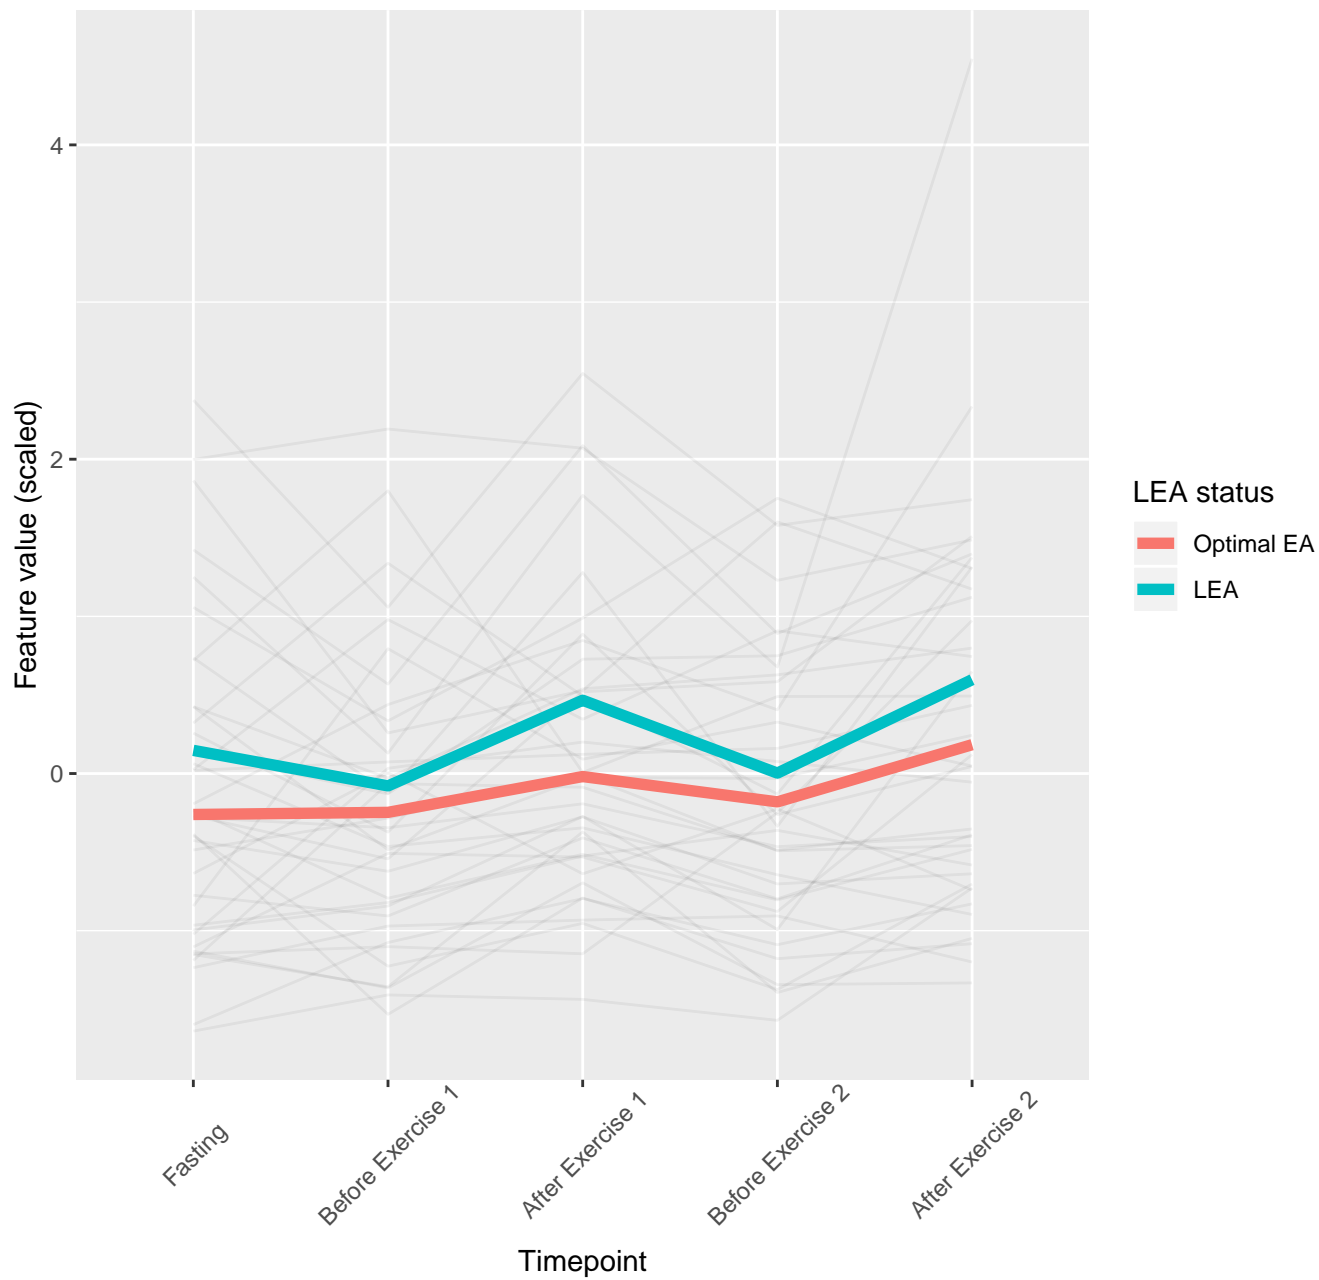

Line plot of PC(38:4)

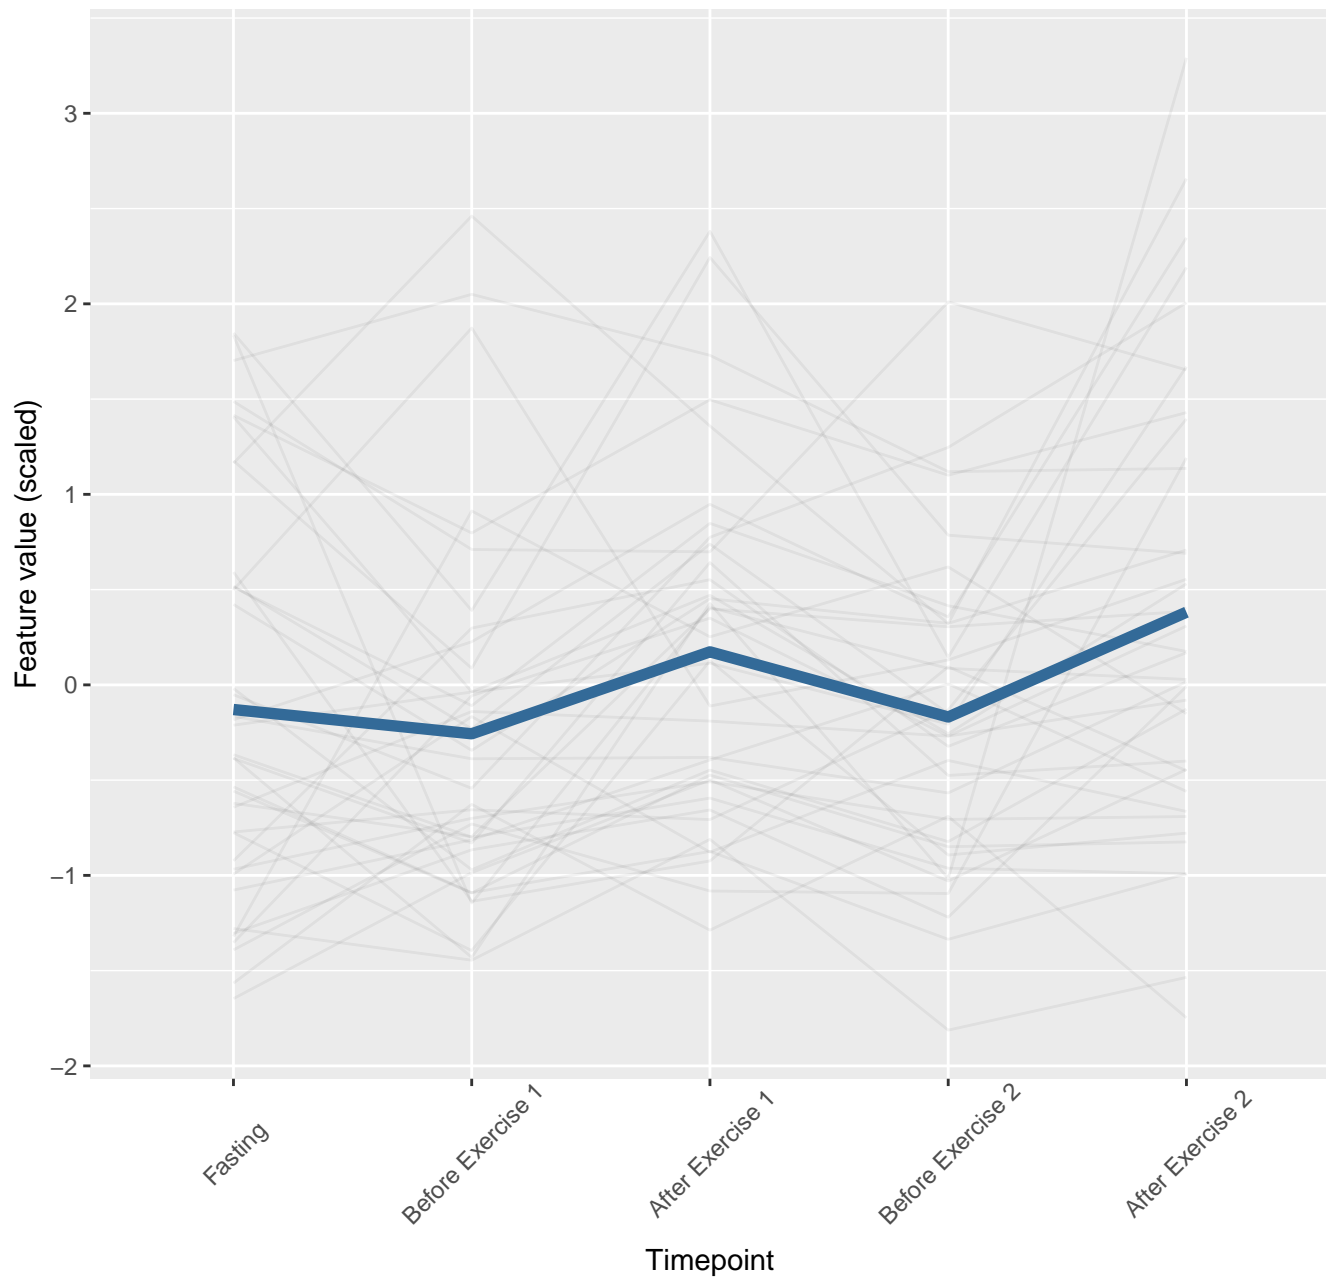

Line plot of PC(38:4)

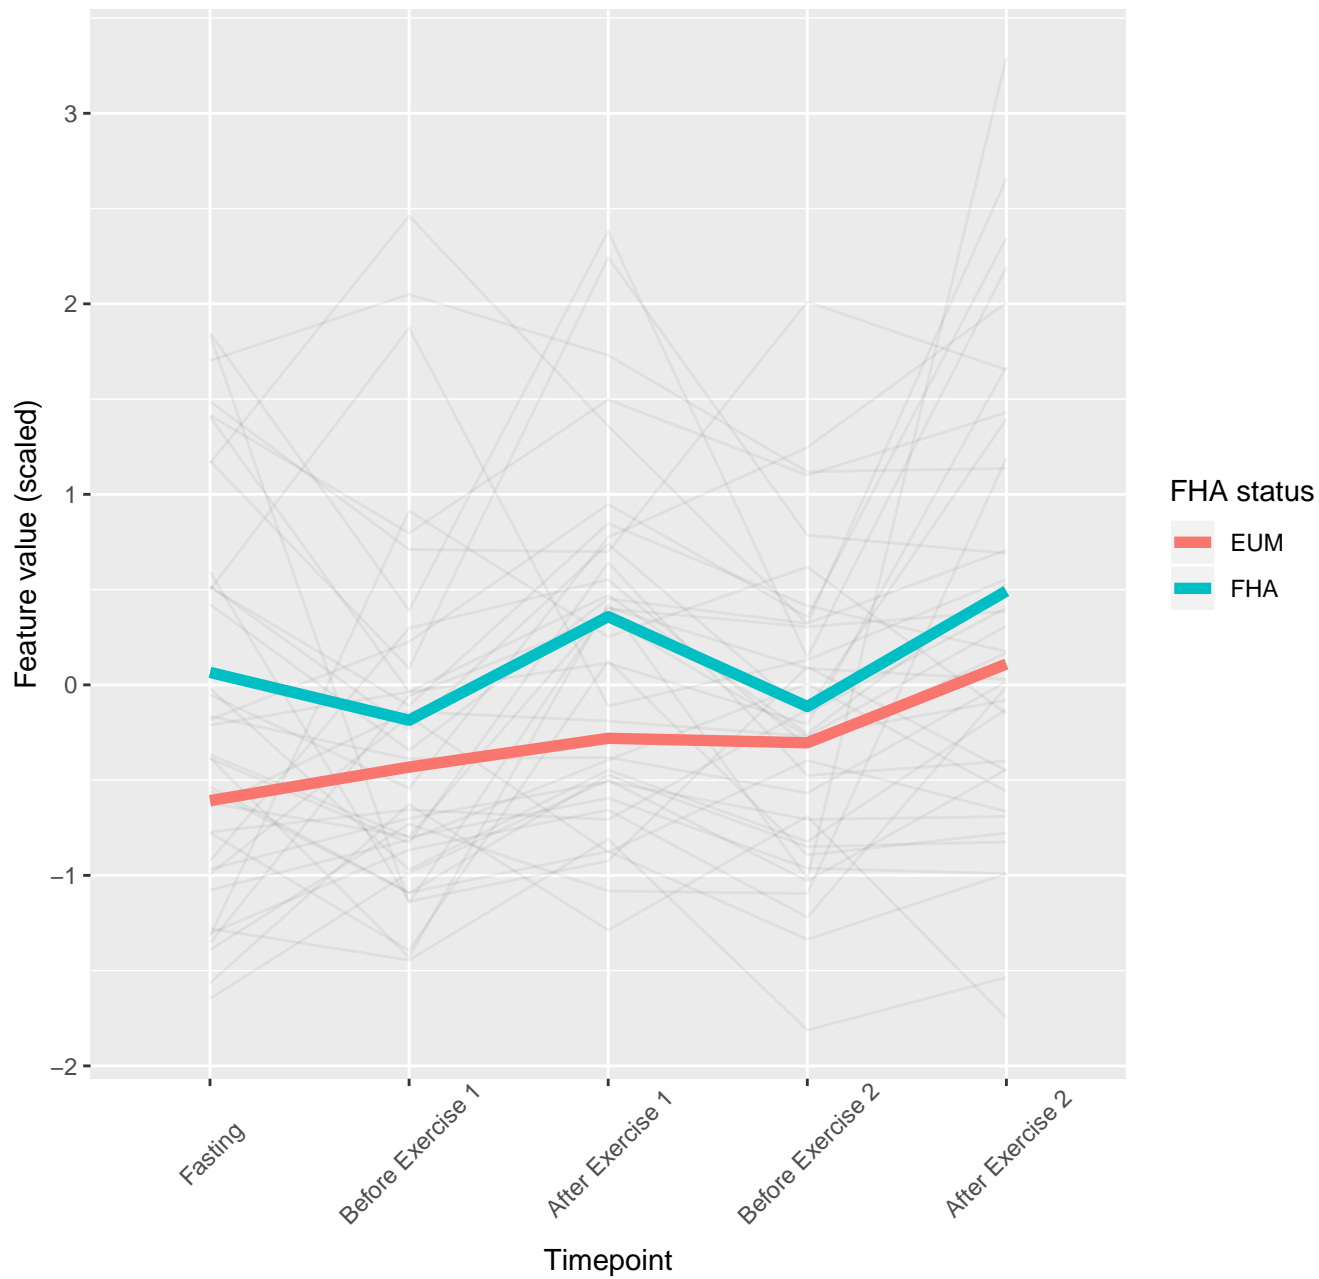

Line plot of PC(38:4)

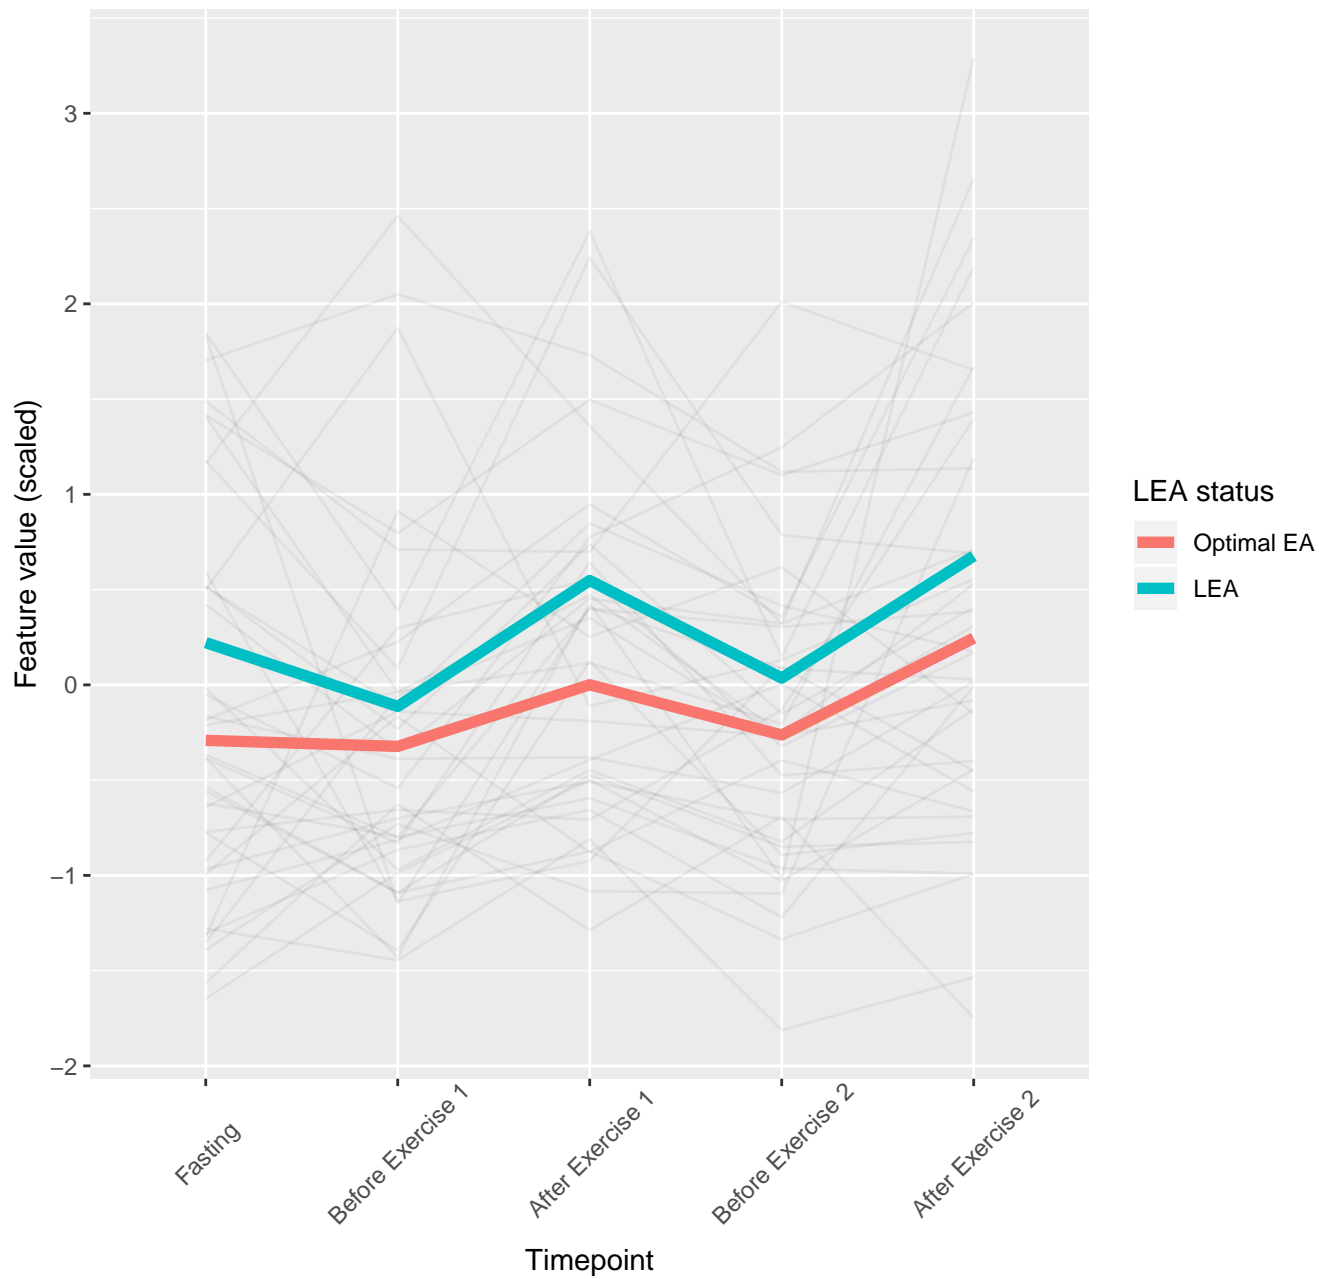



Line plot of PC(38:5)

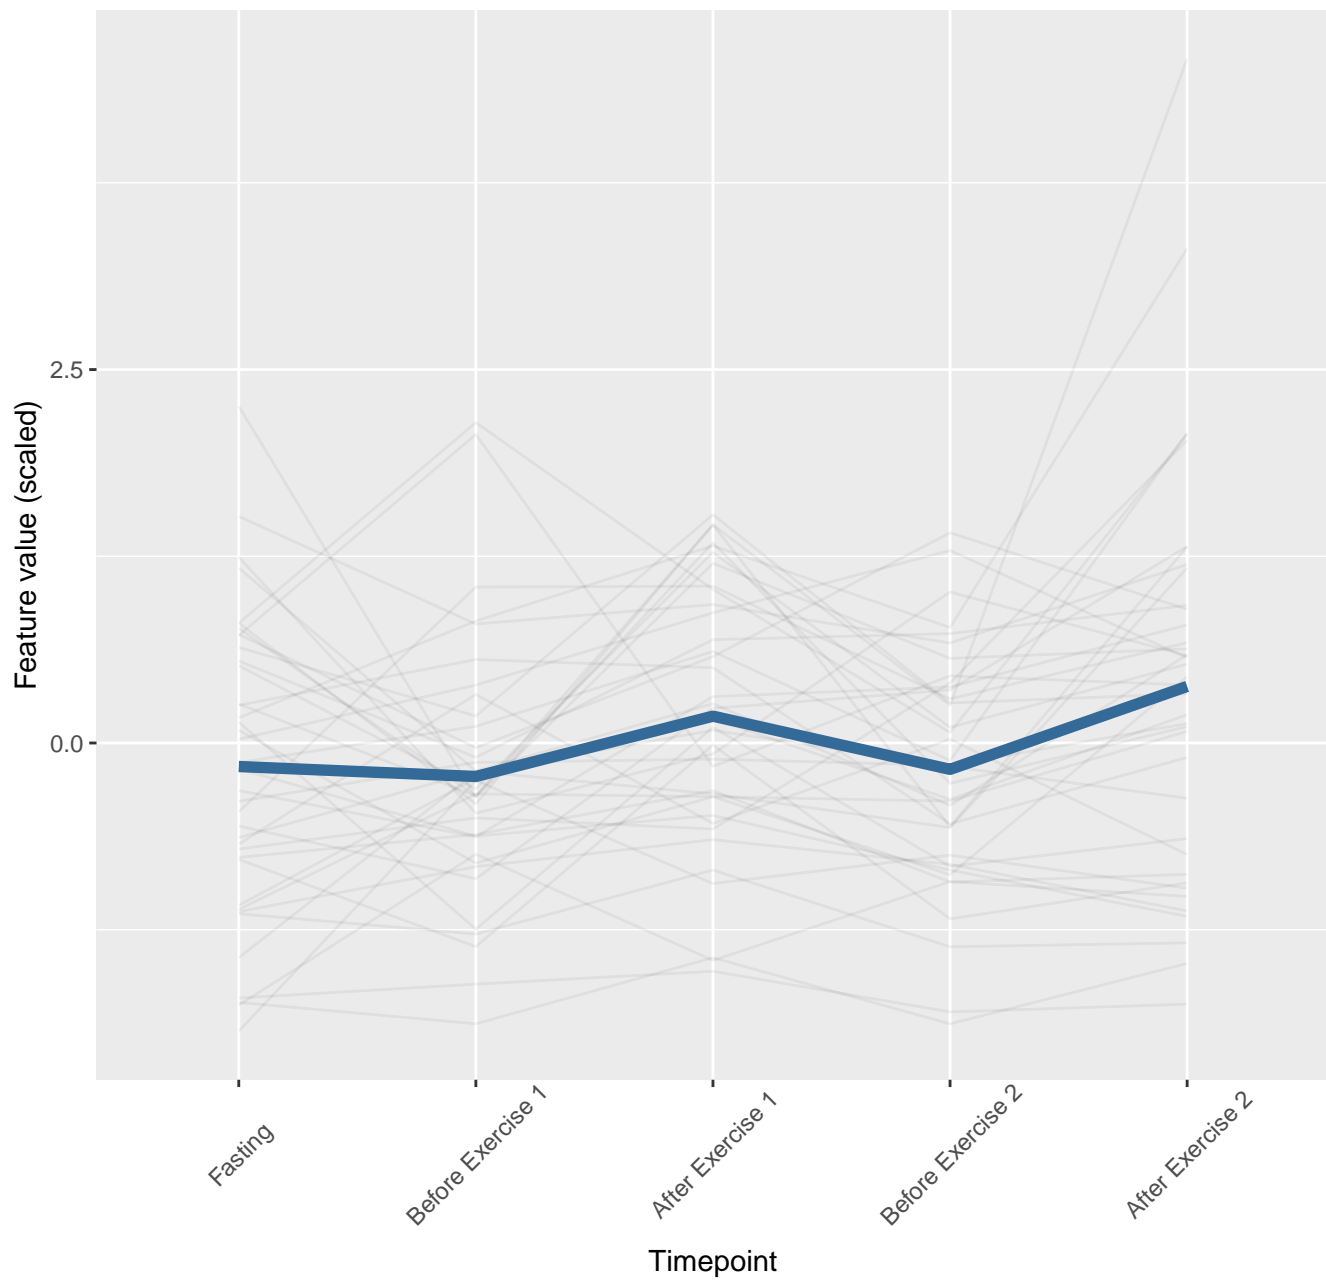

Line plot of PC(38:5)

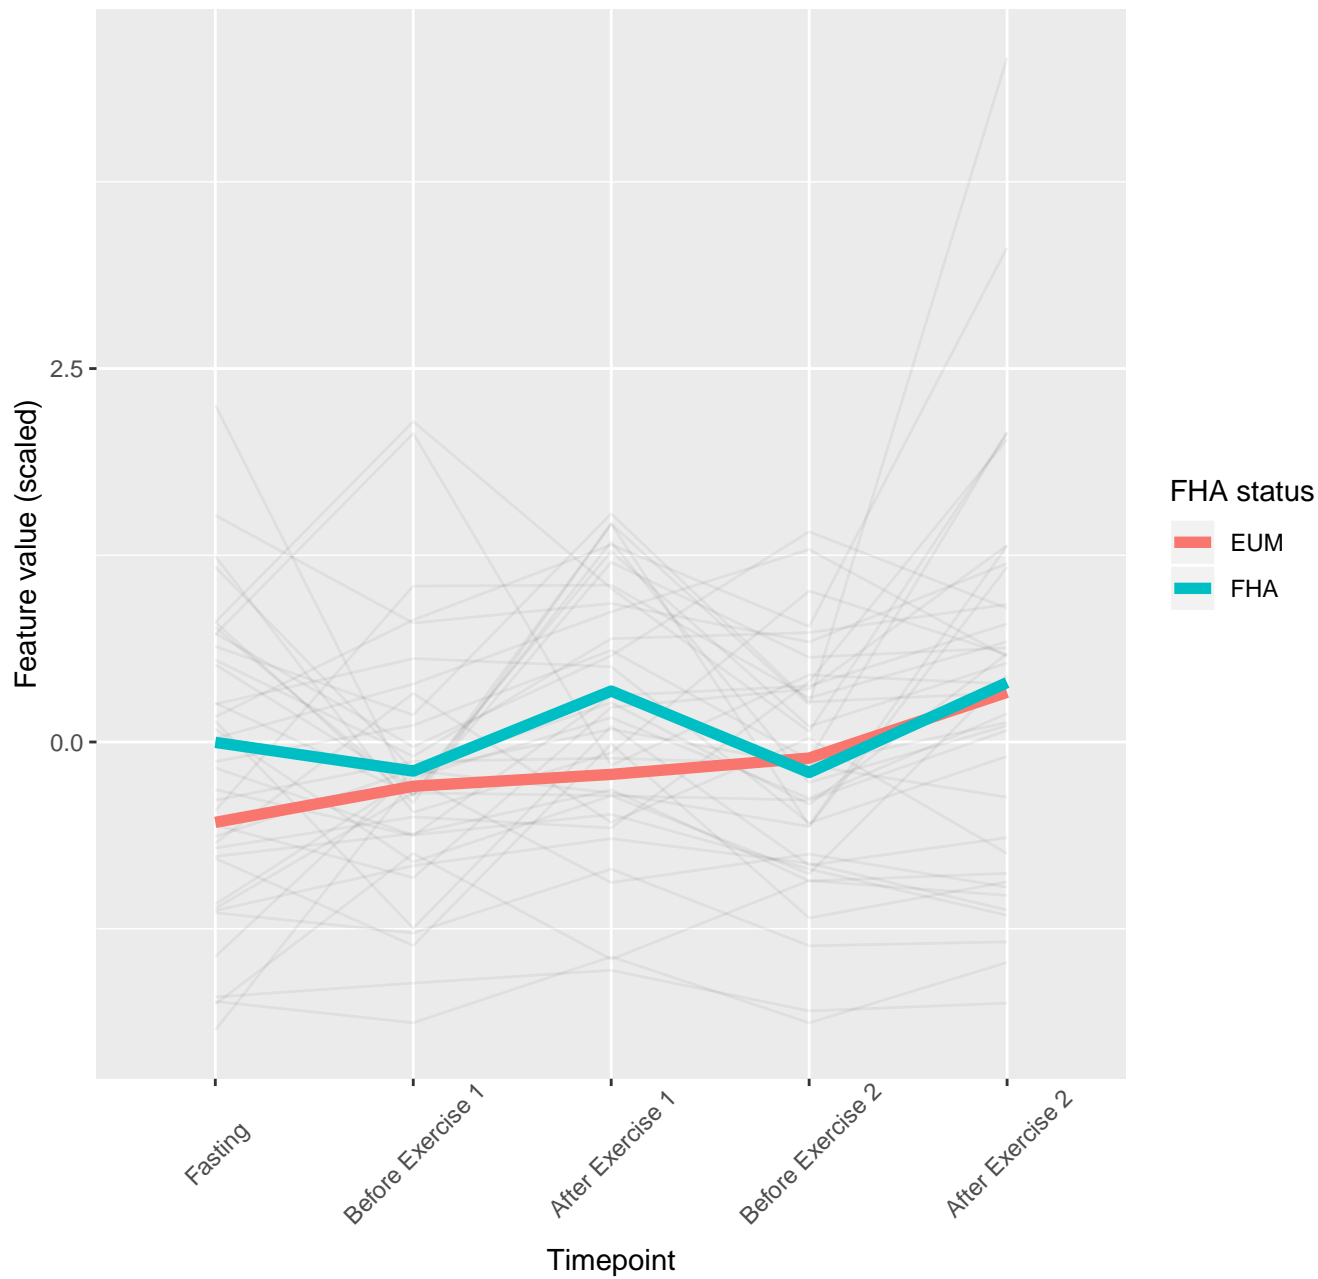

Line plot of PC(38:5)

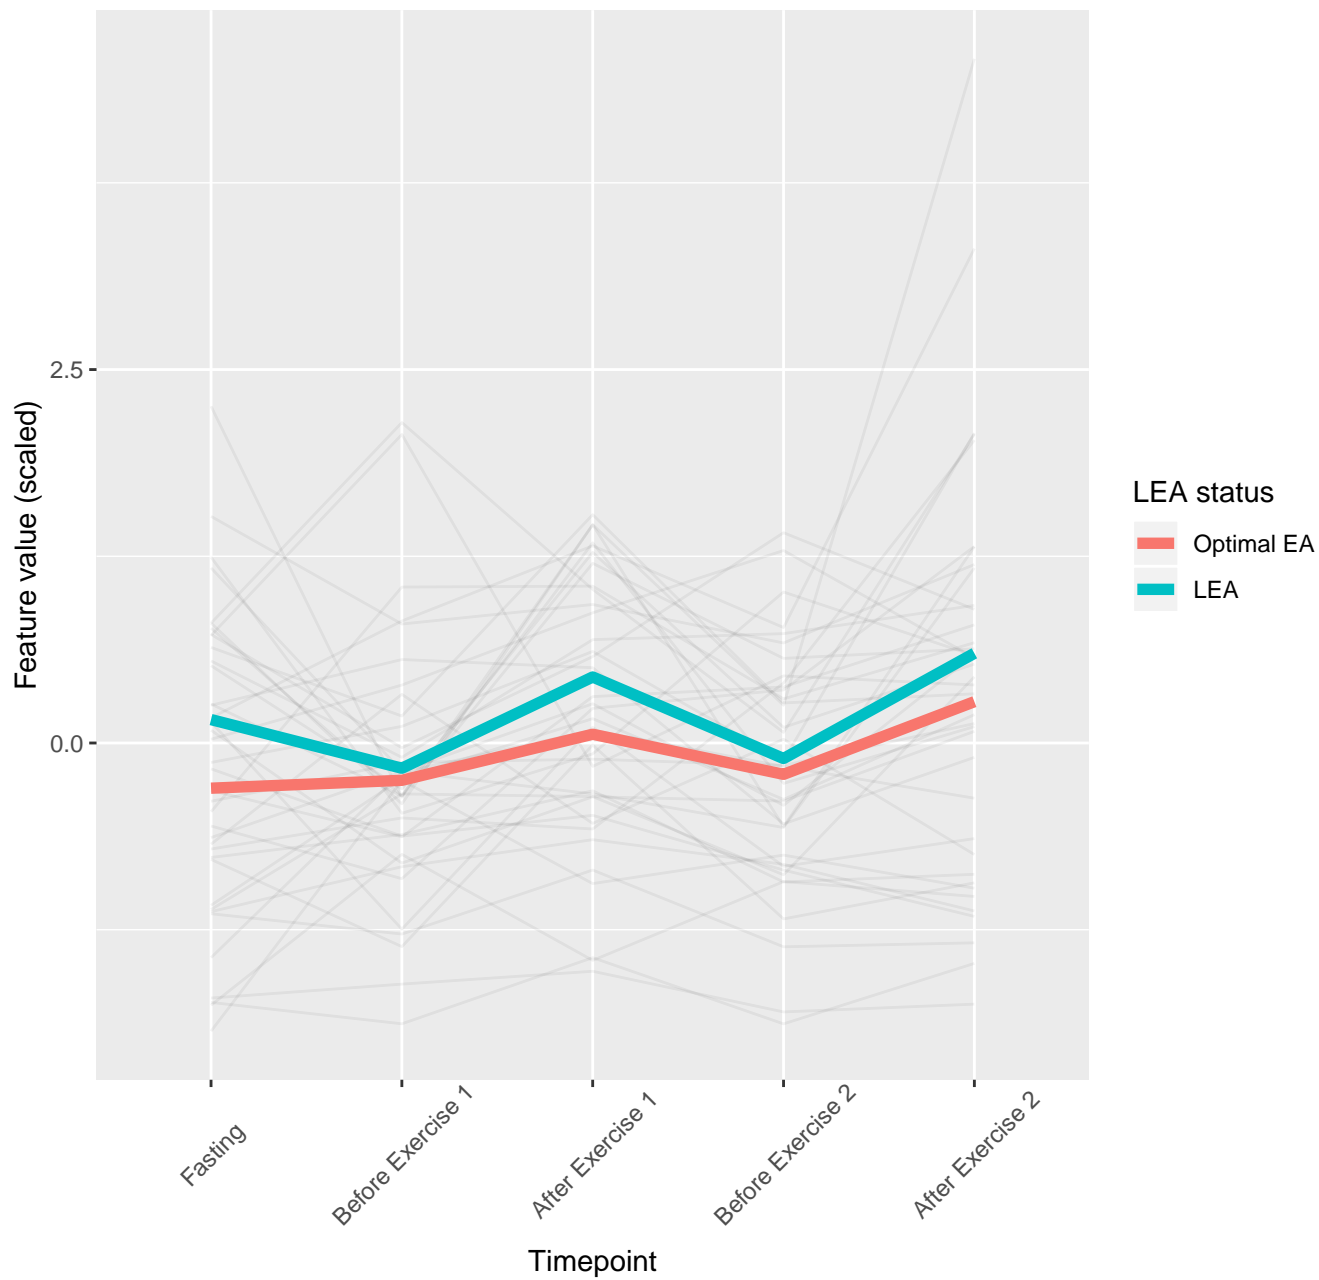

Line plot of PC(38:6)

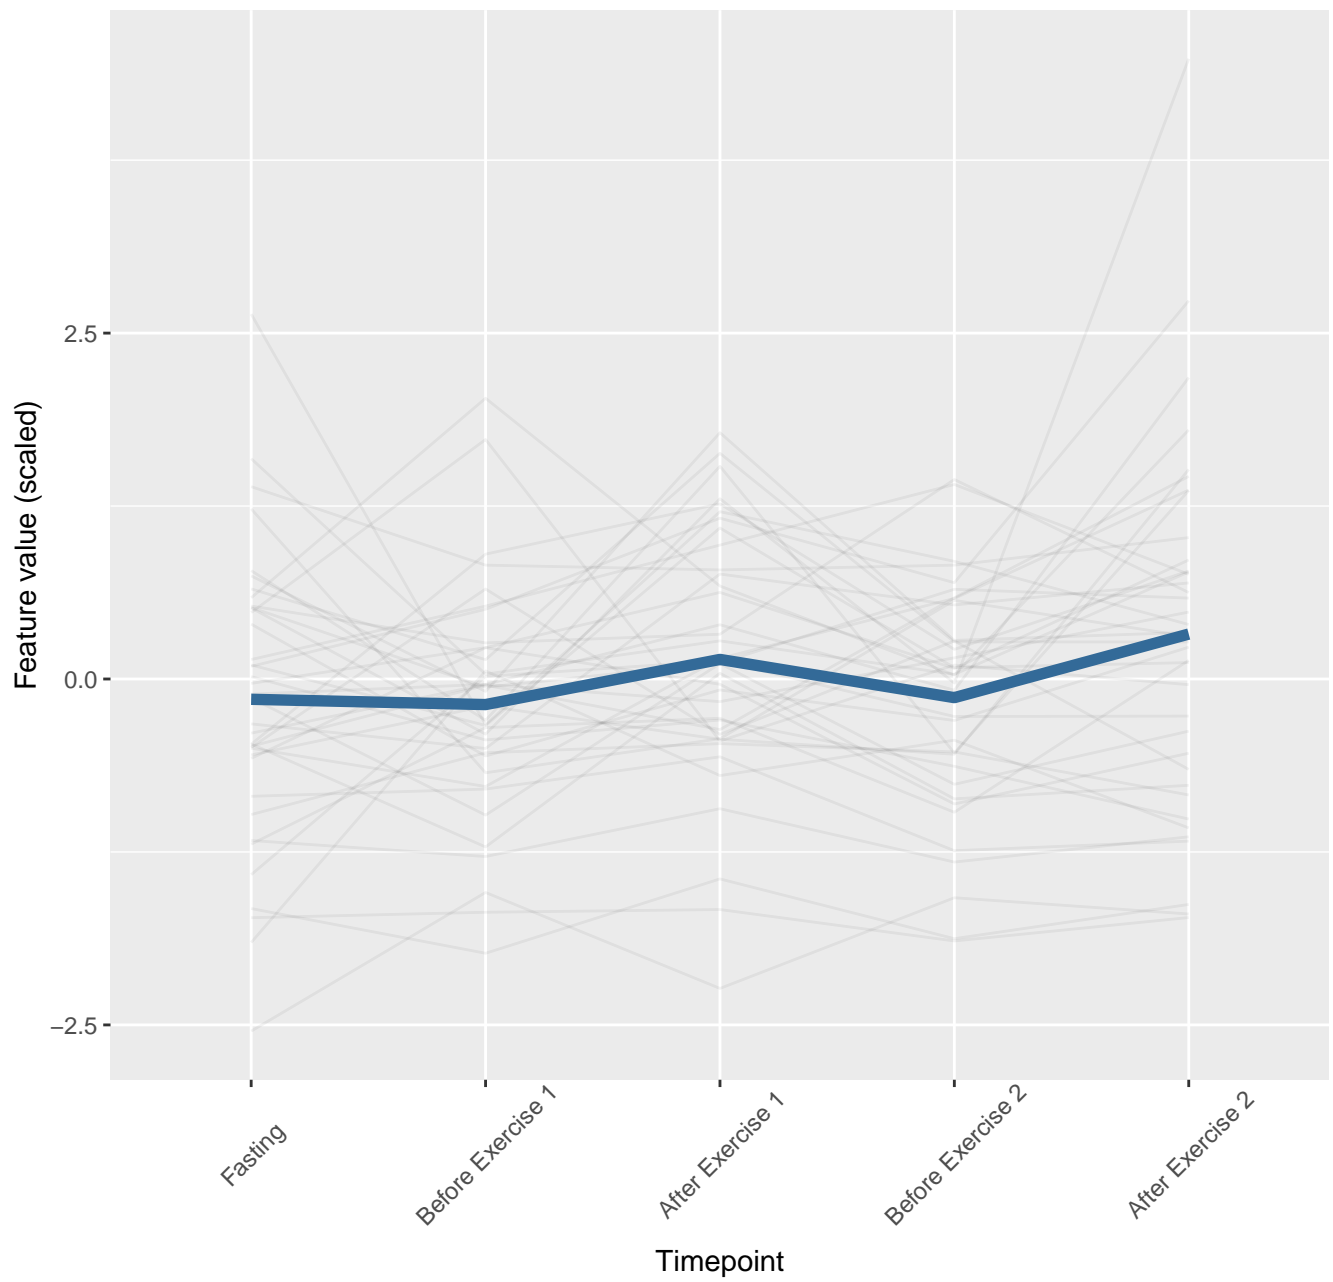

Line plot of PC(38:6)

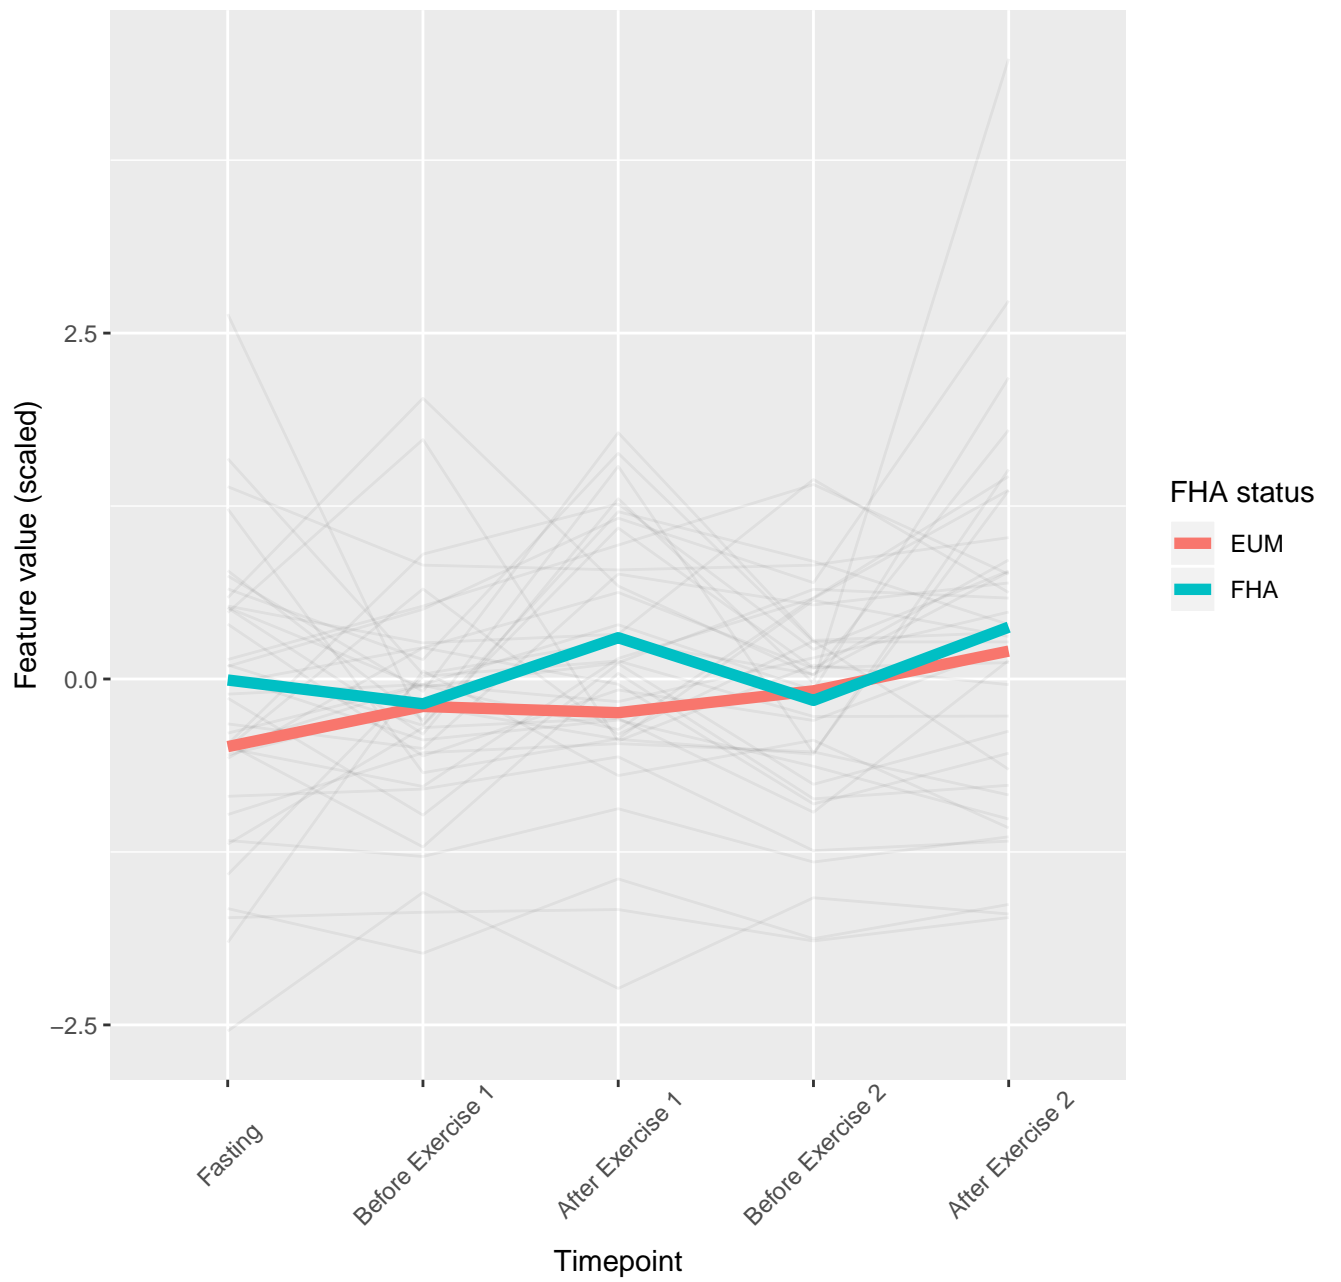

Line plot of PC(38:6)

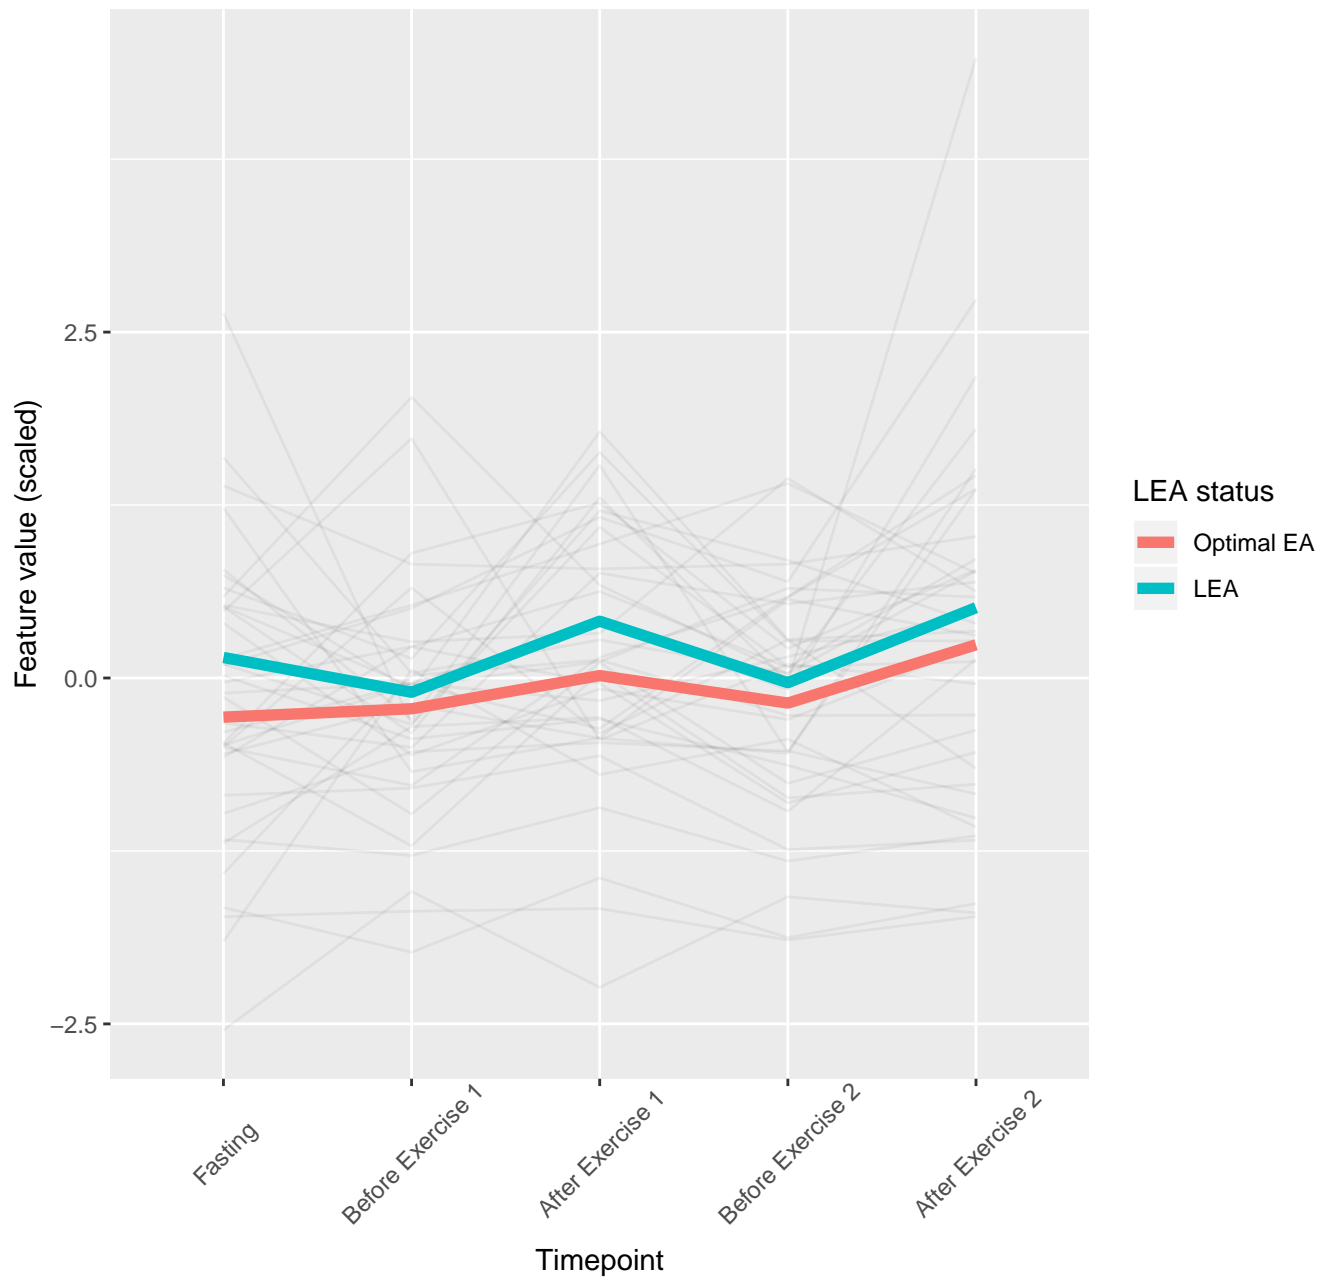

Line plot of PC(38:7)

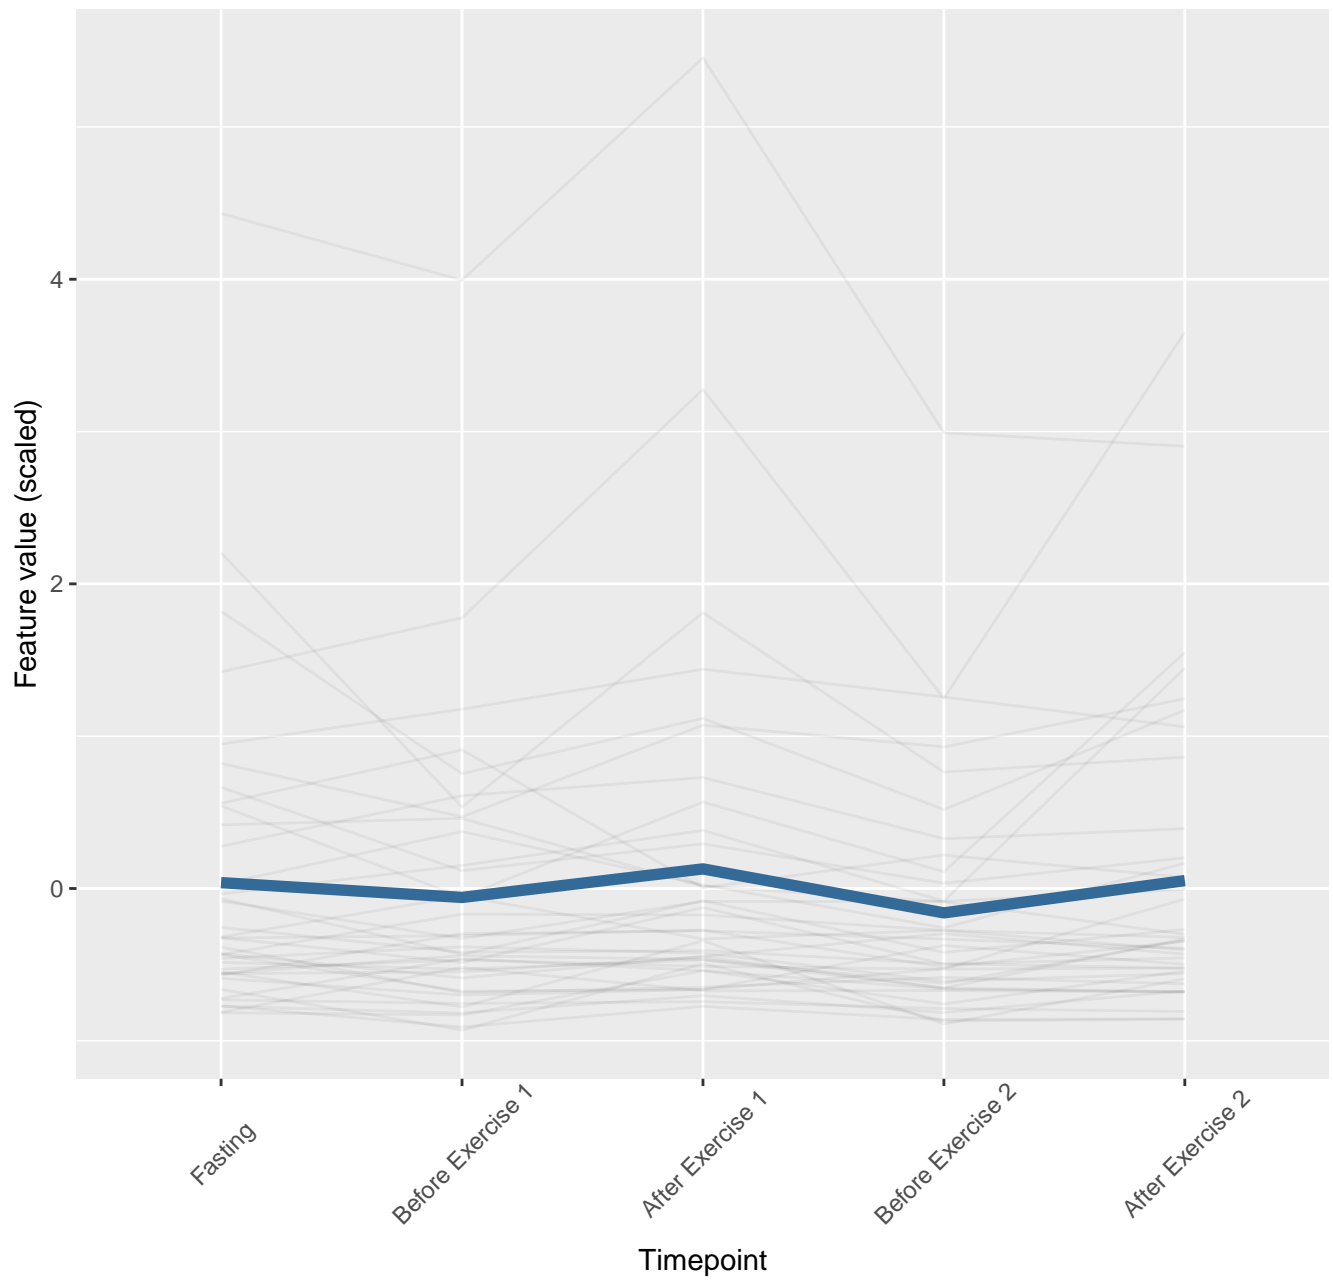

Line plot of PC(38:7)

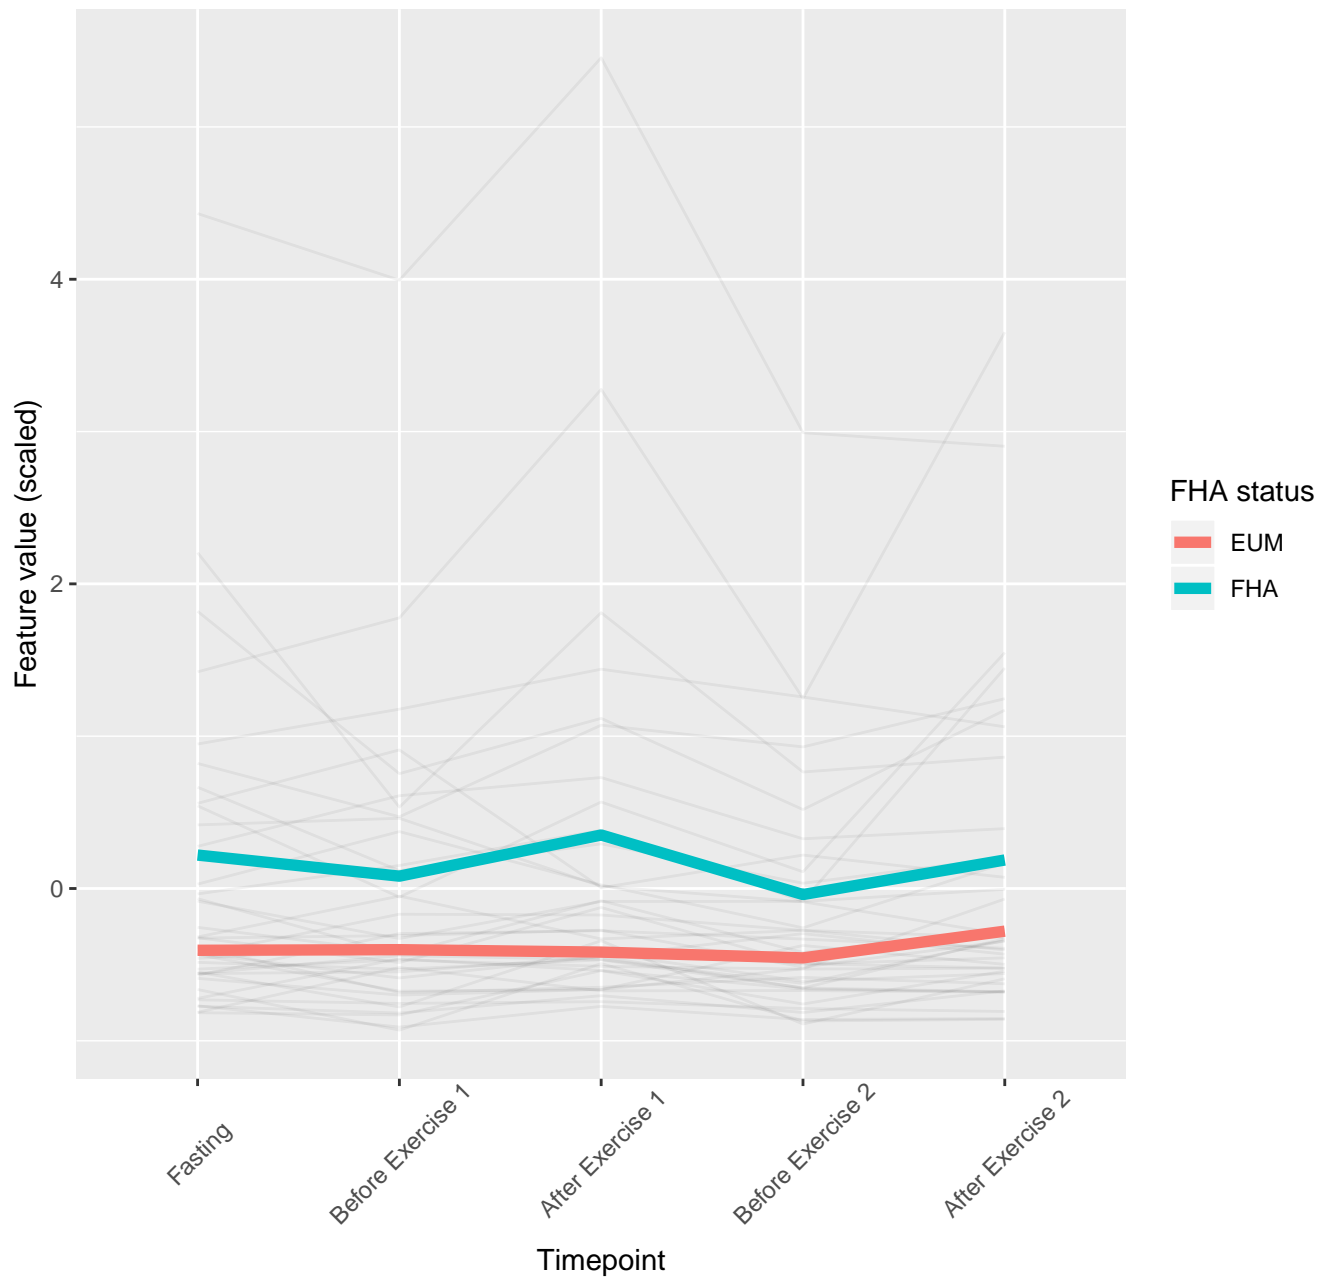



Line plot of PC(38:7)

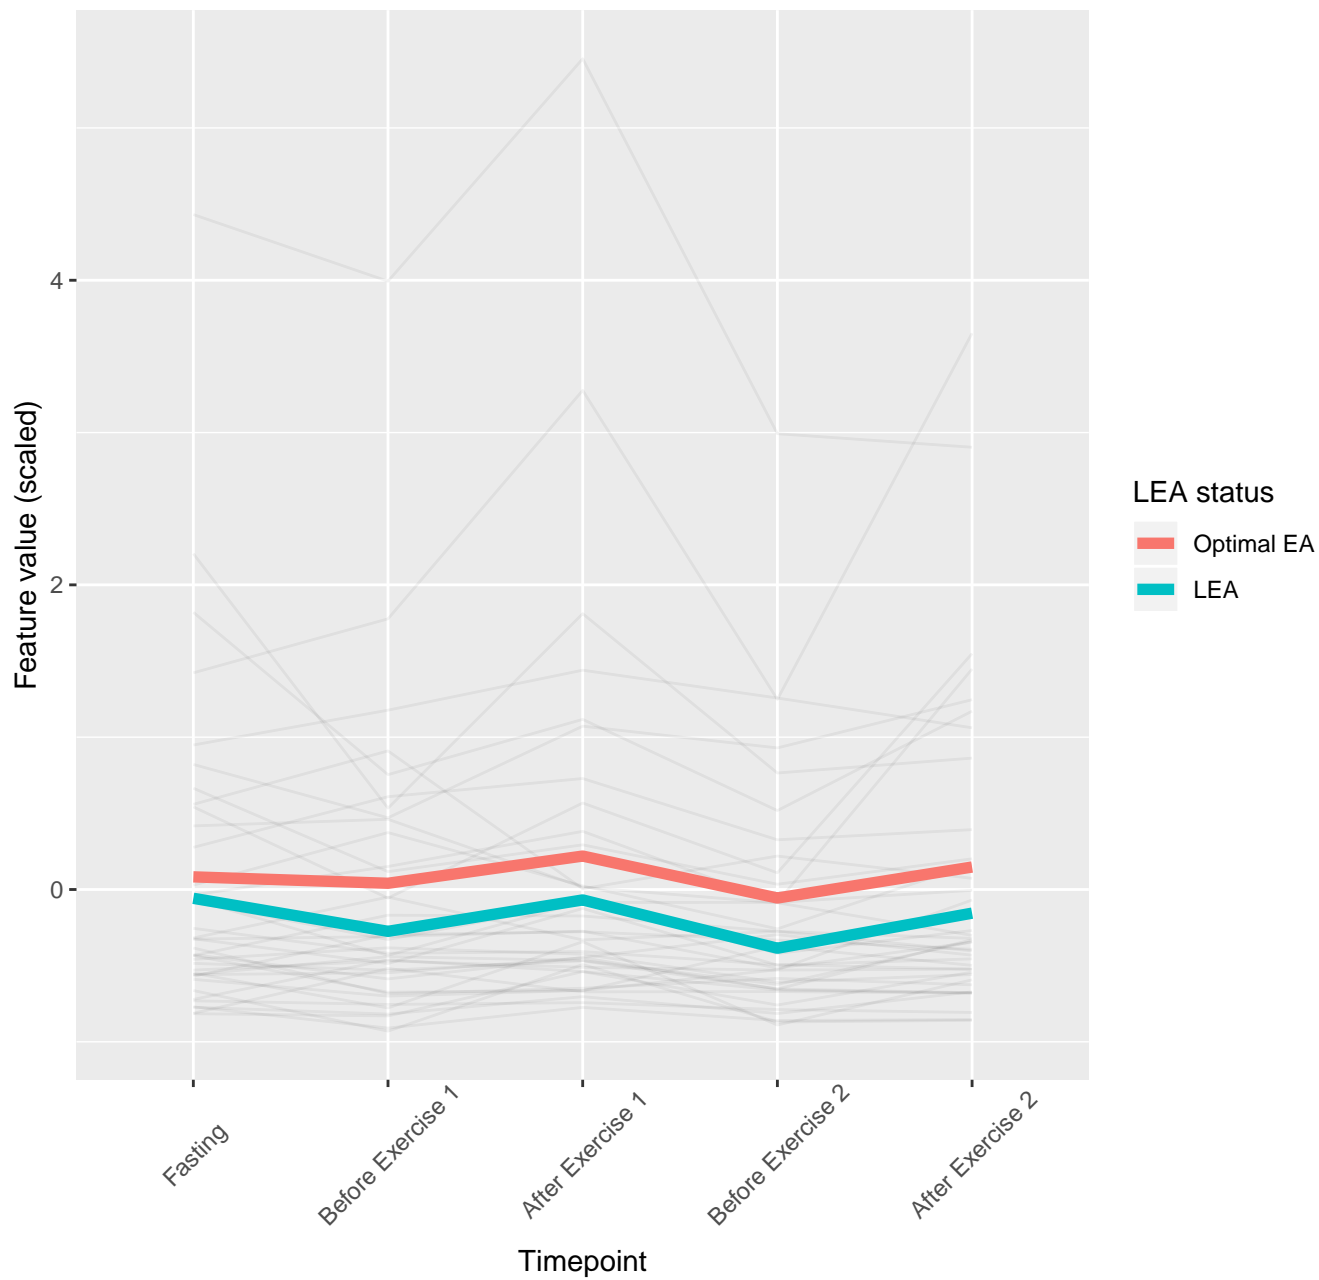

Line plot of PC(40:3)

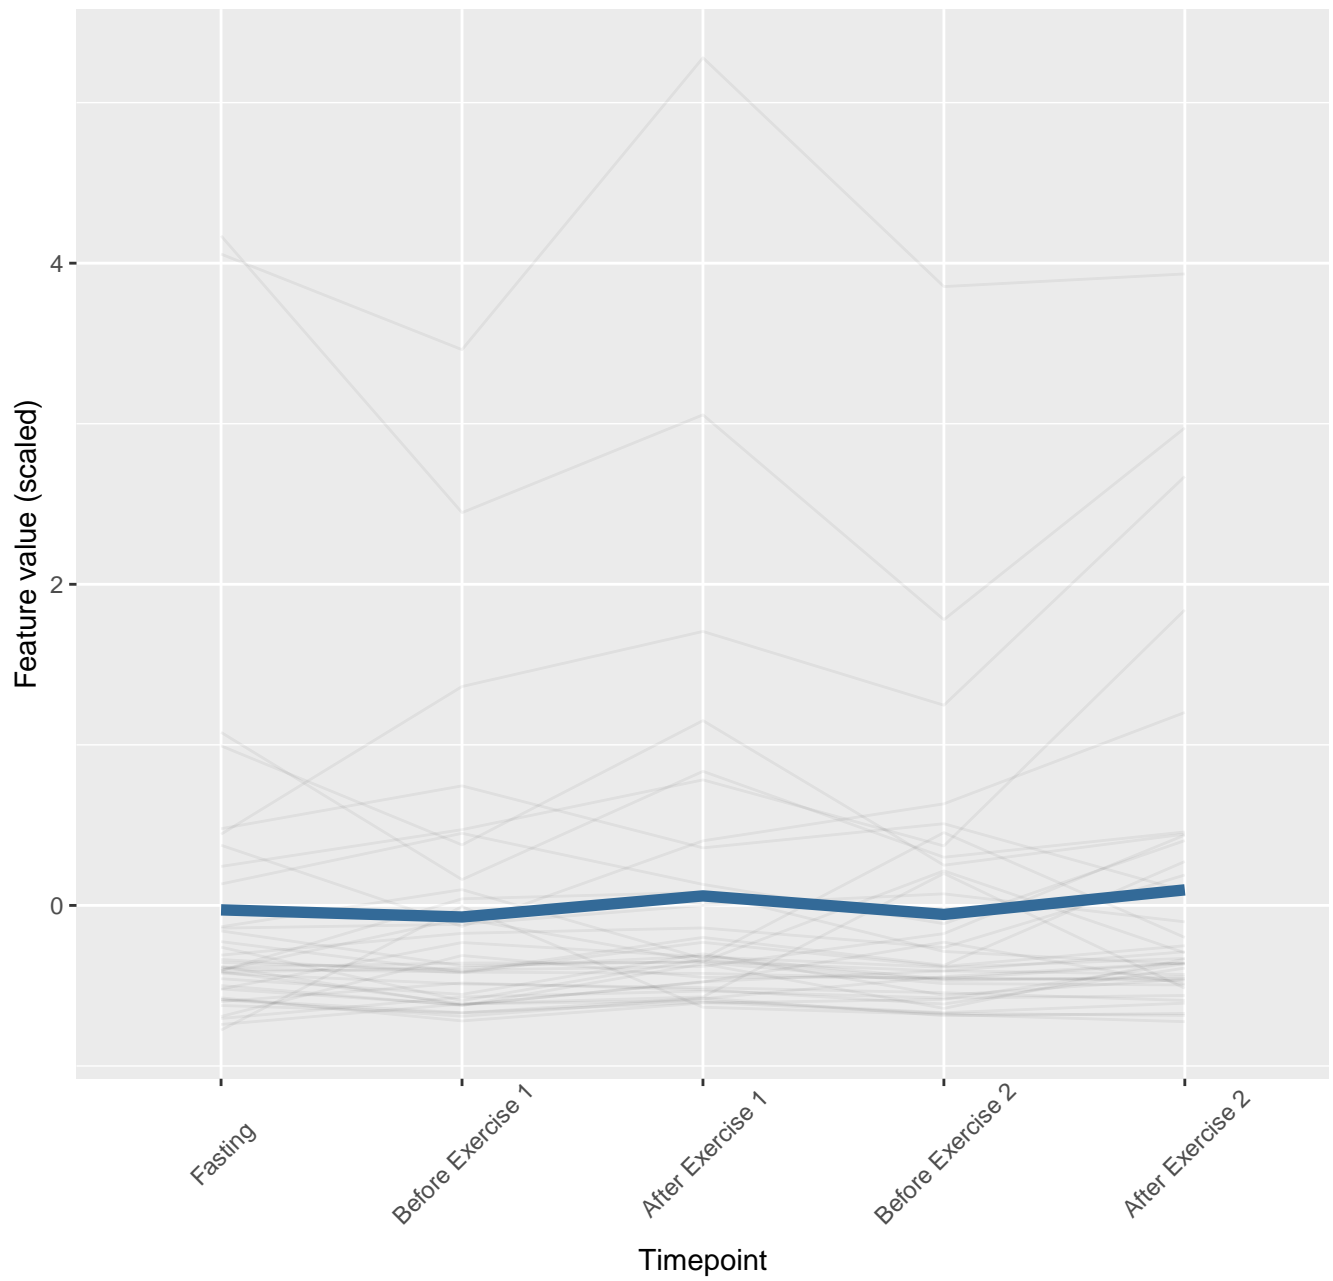

Line plot of PC(40:3)

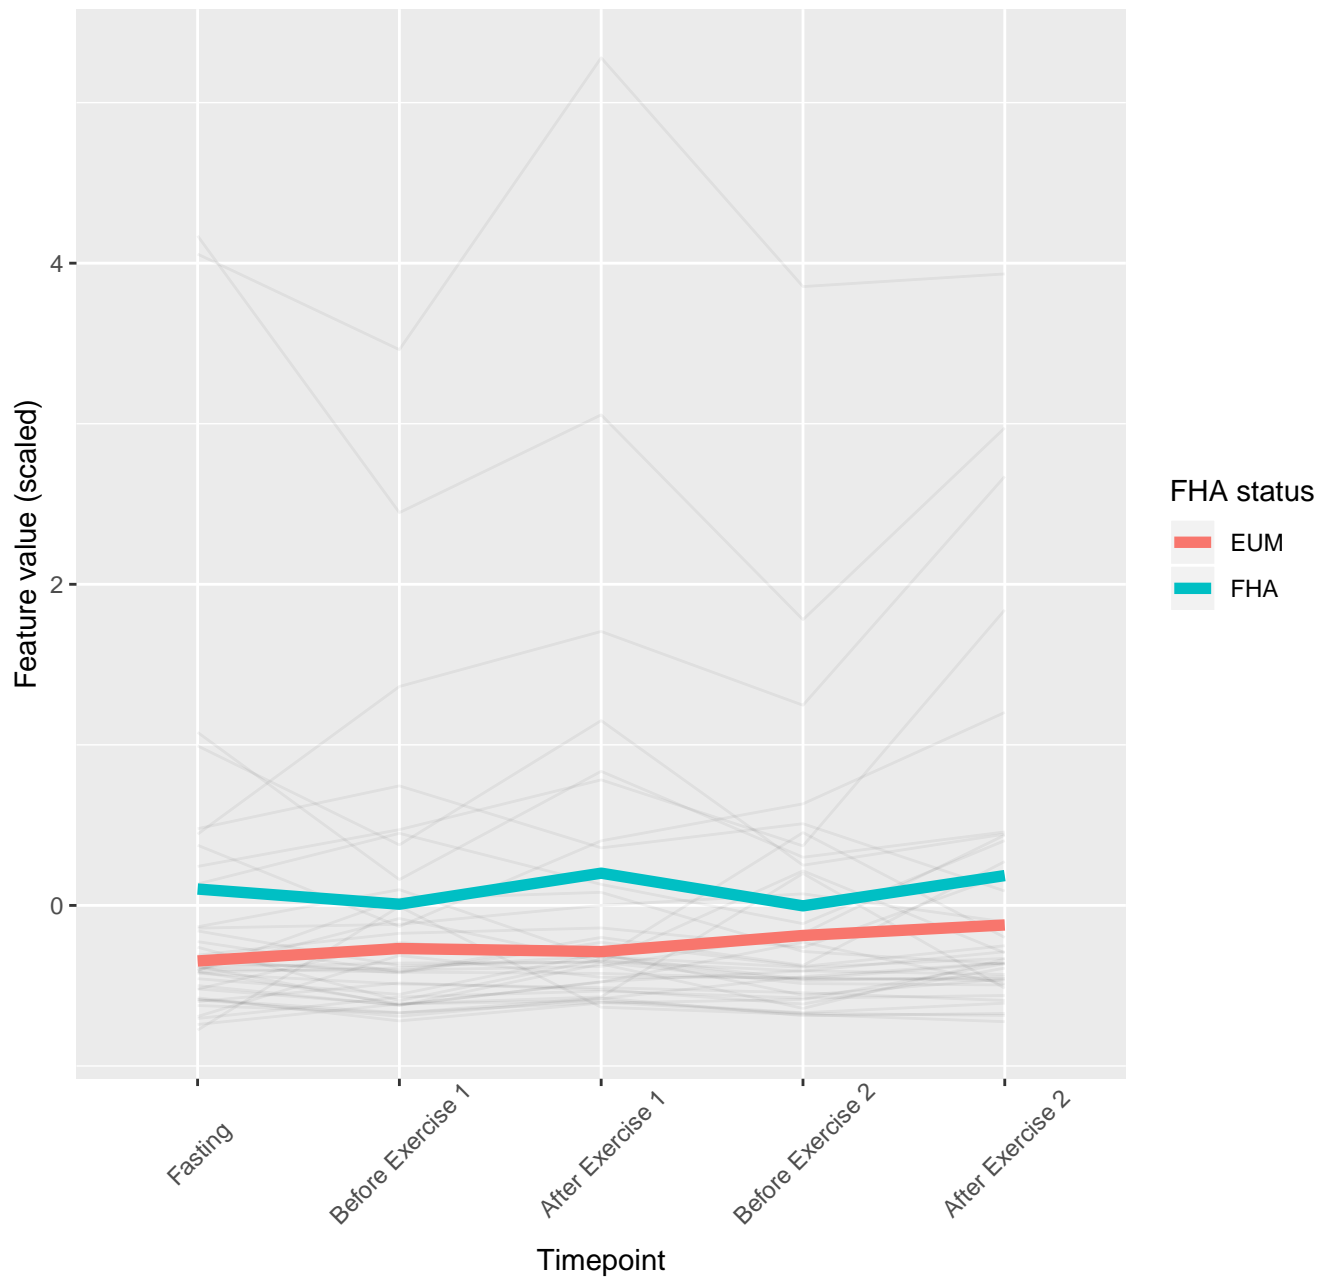

Line plot of PC(40:3)

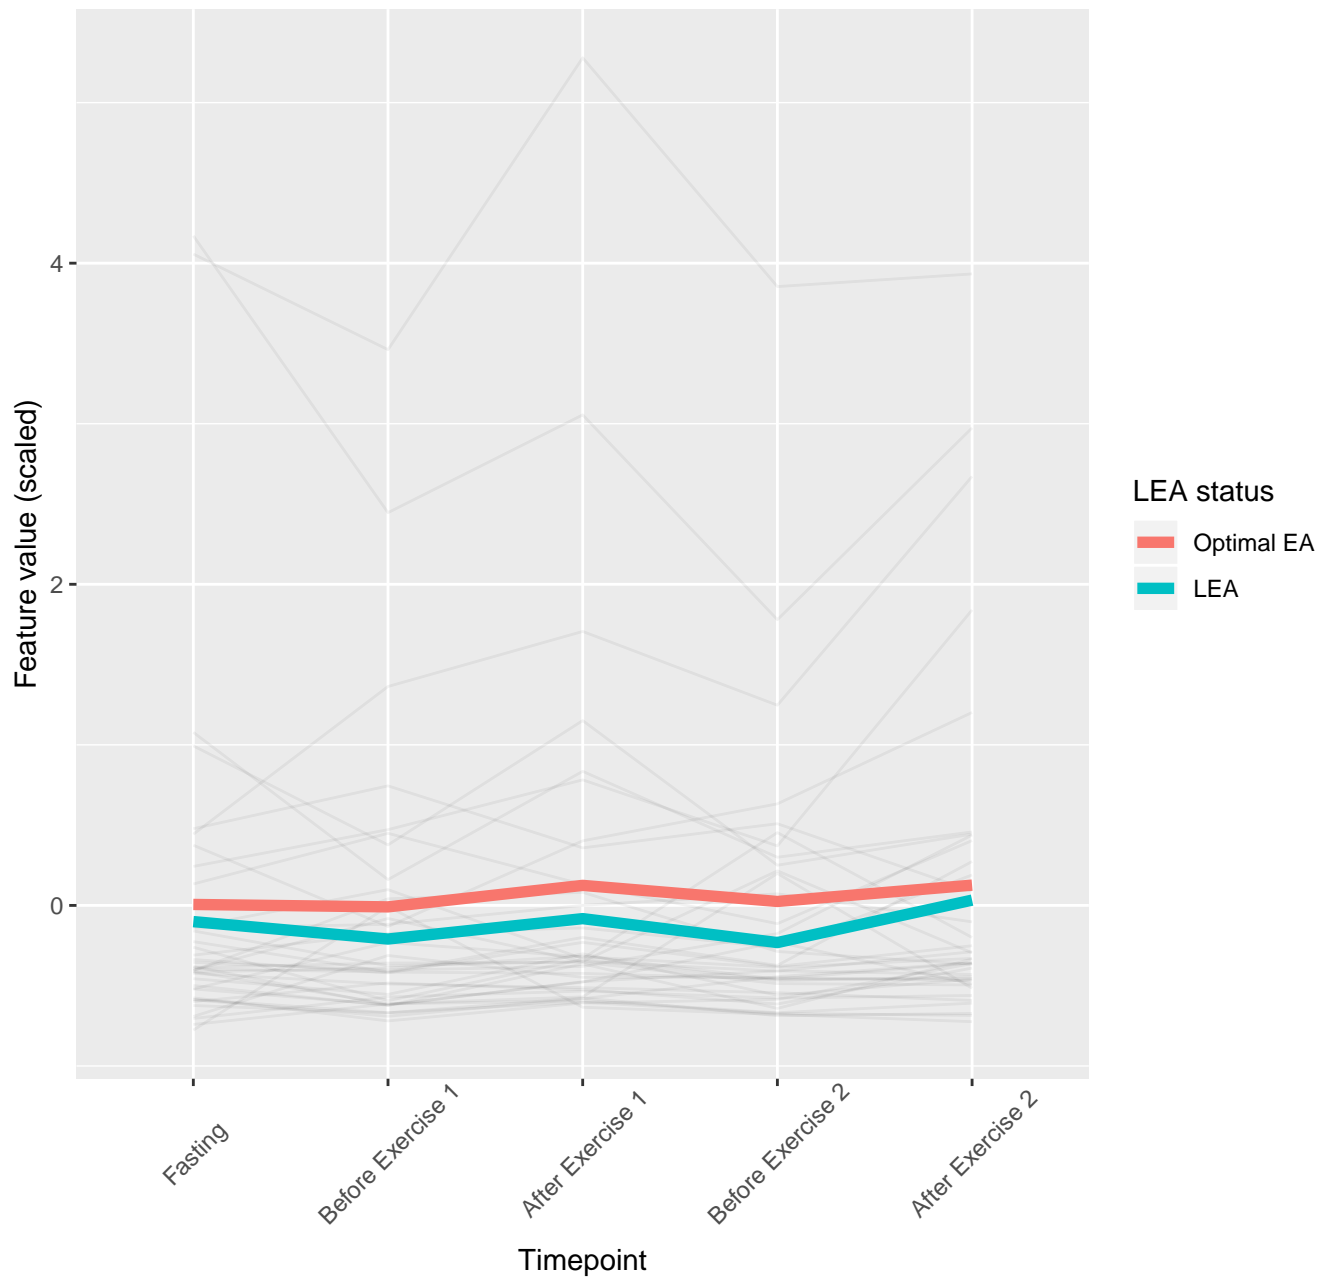

Line plot of PC(40:4)

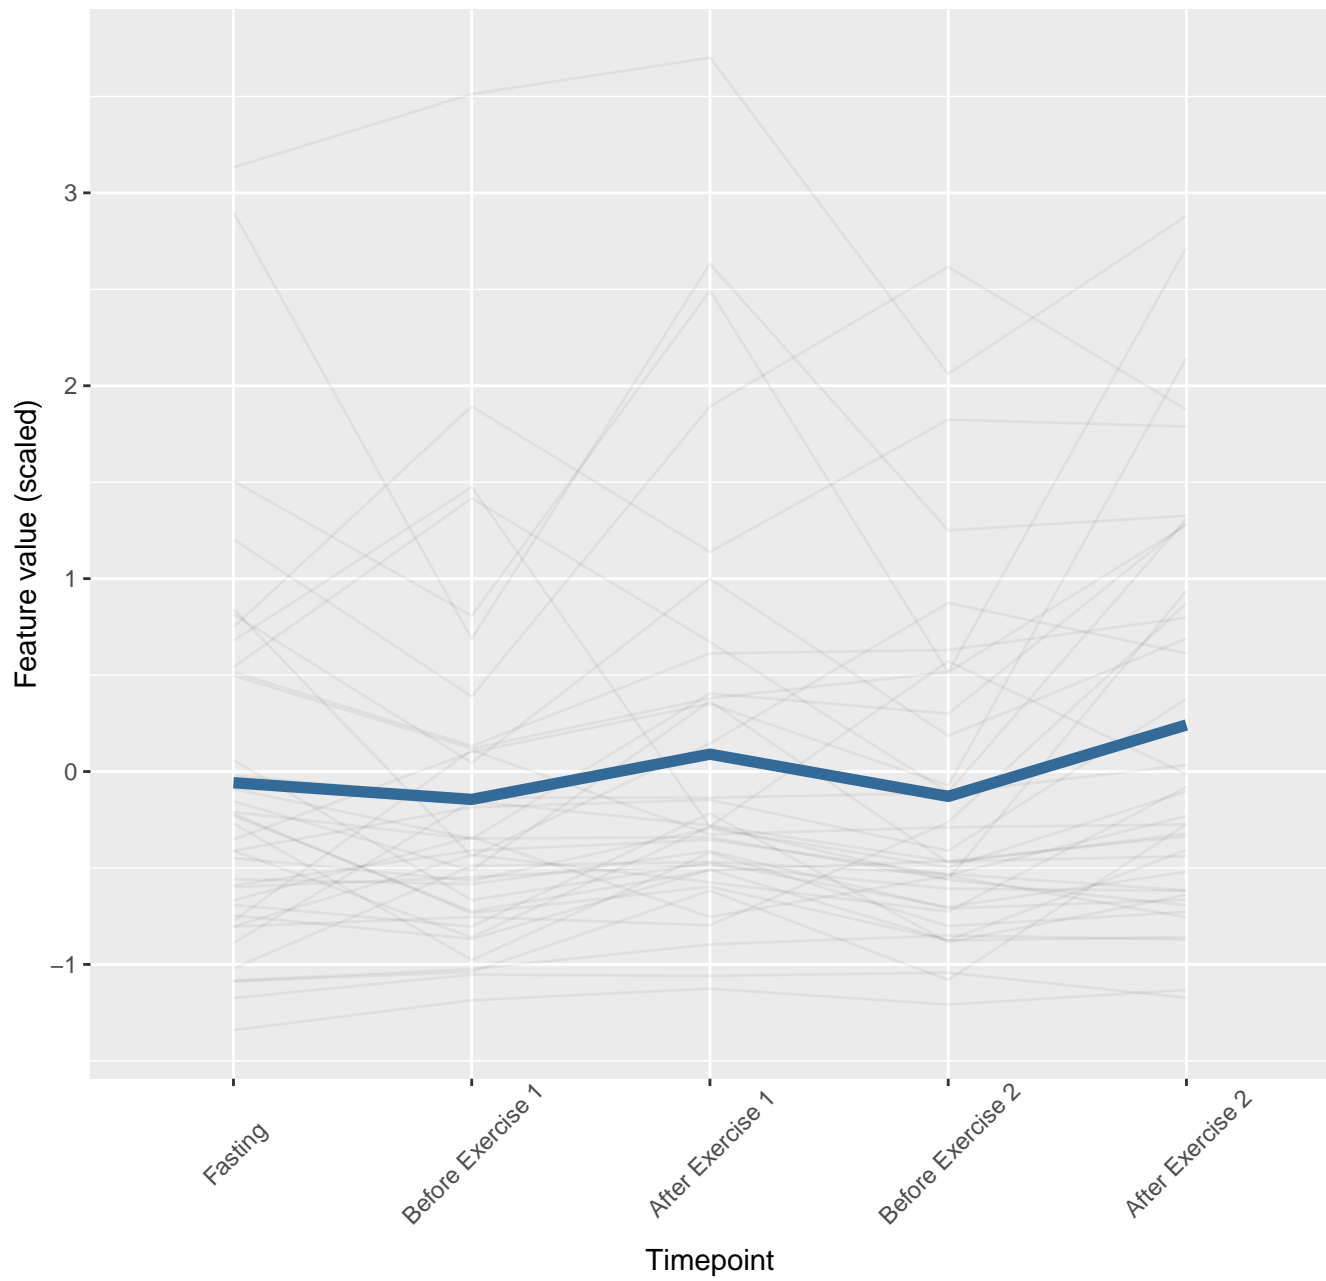

Line plot of PC(40:4)

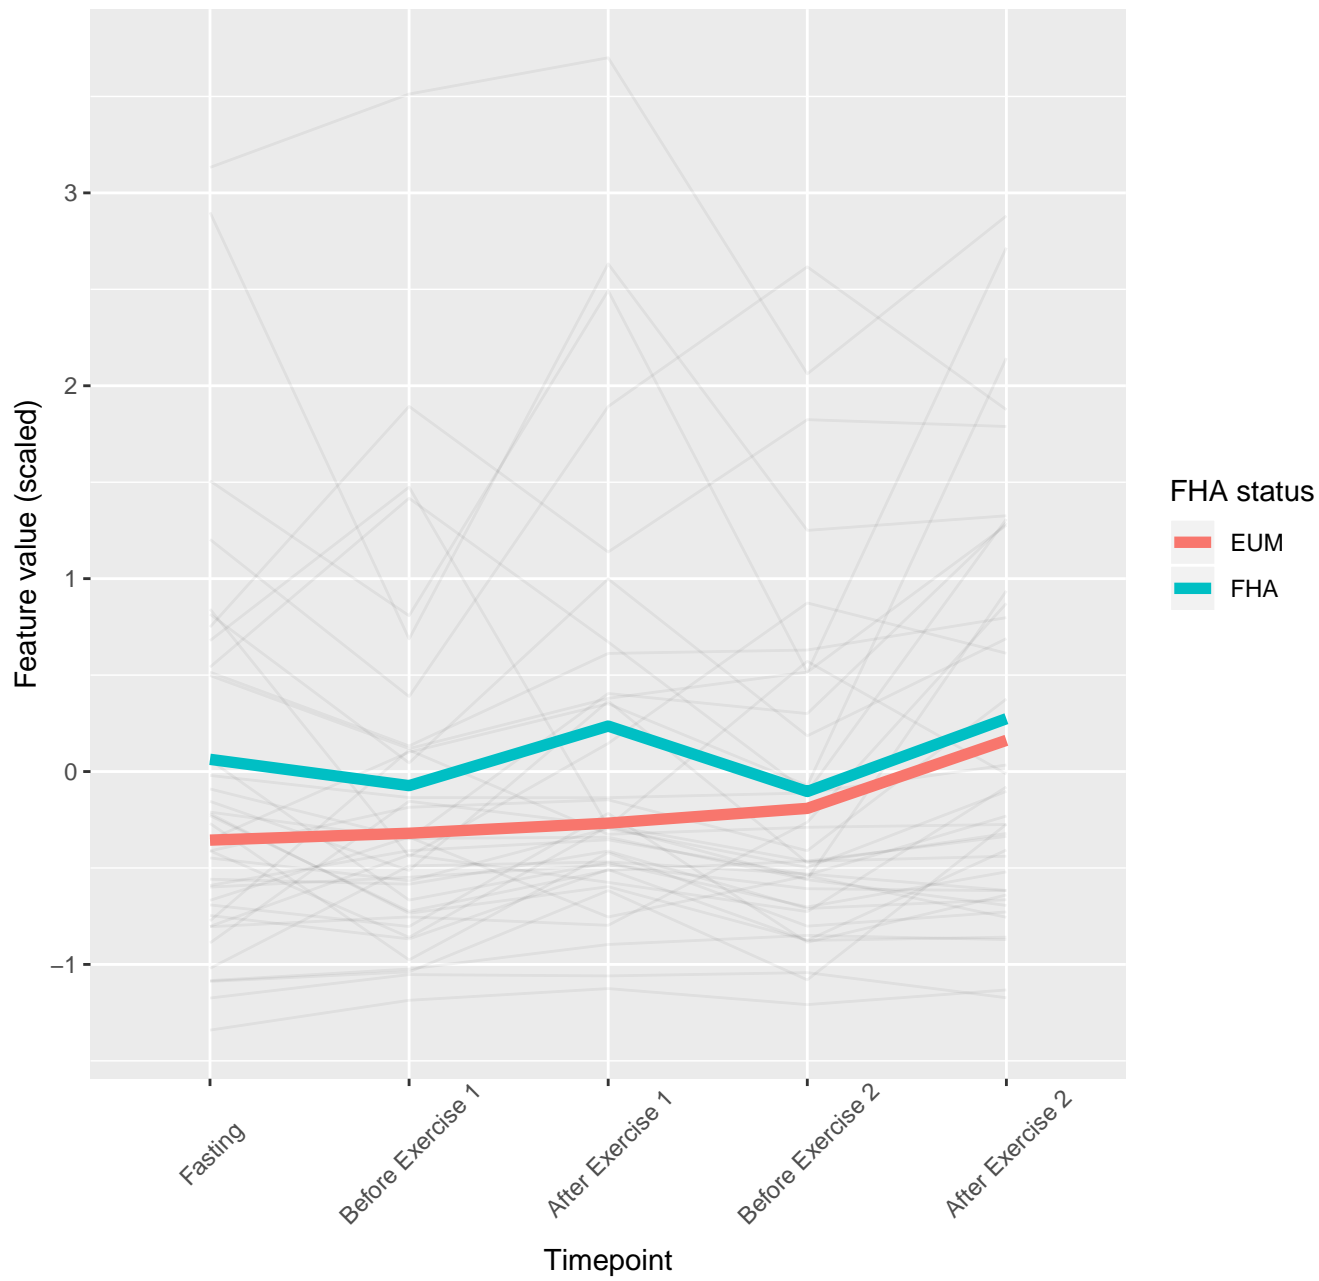

Line plot of PC(40:4)

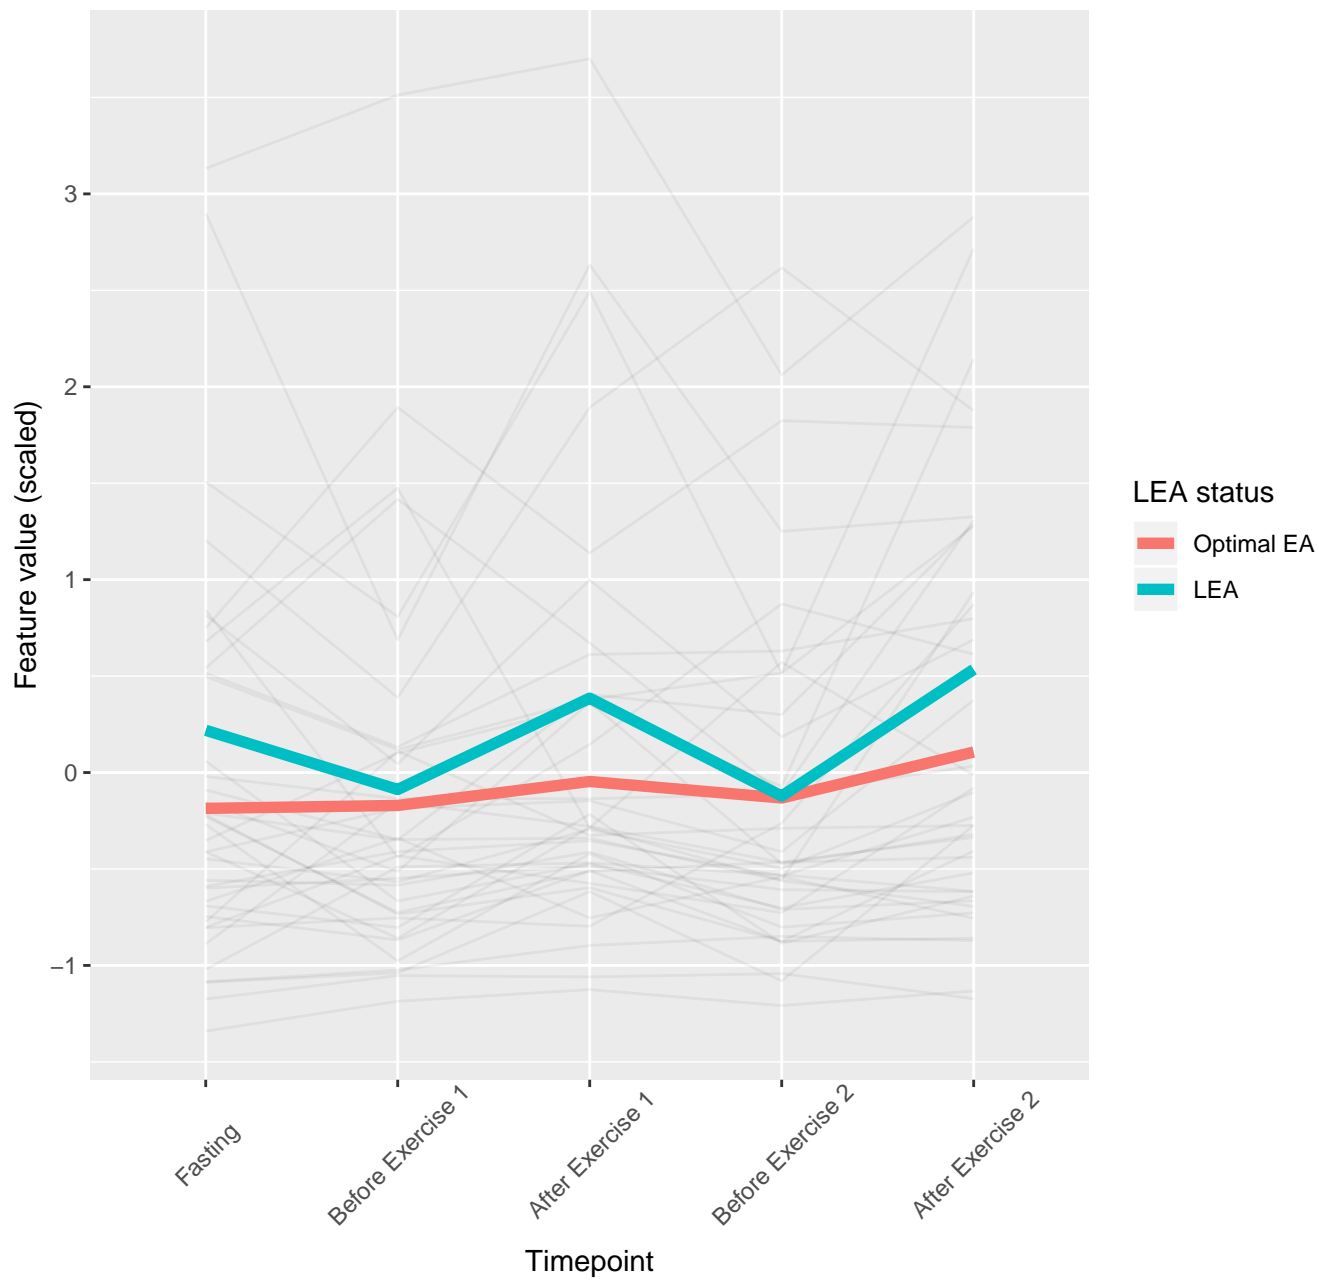

Line plot of PC(40:5)

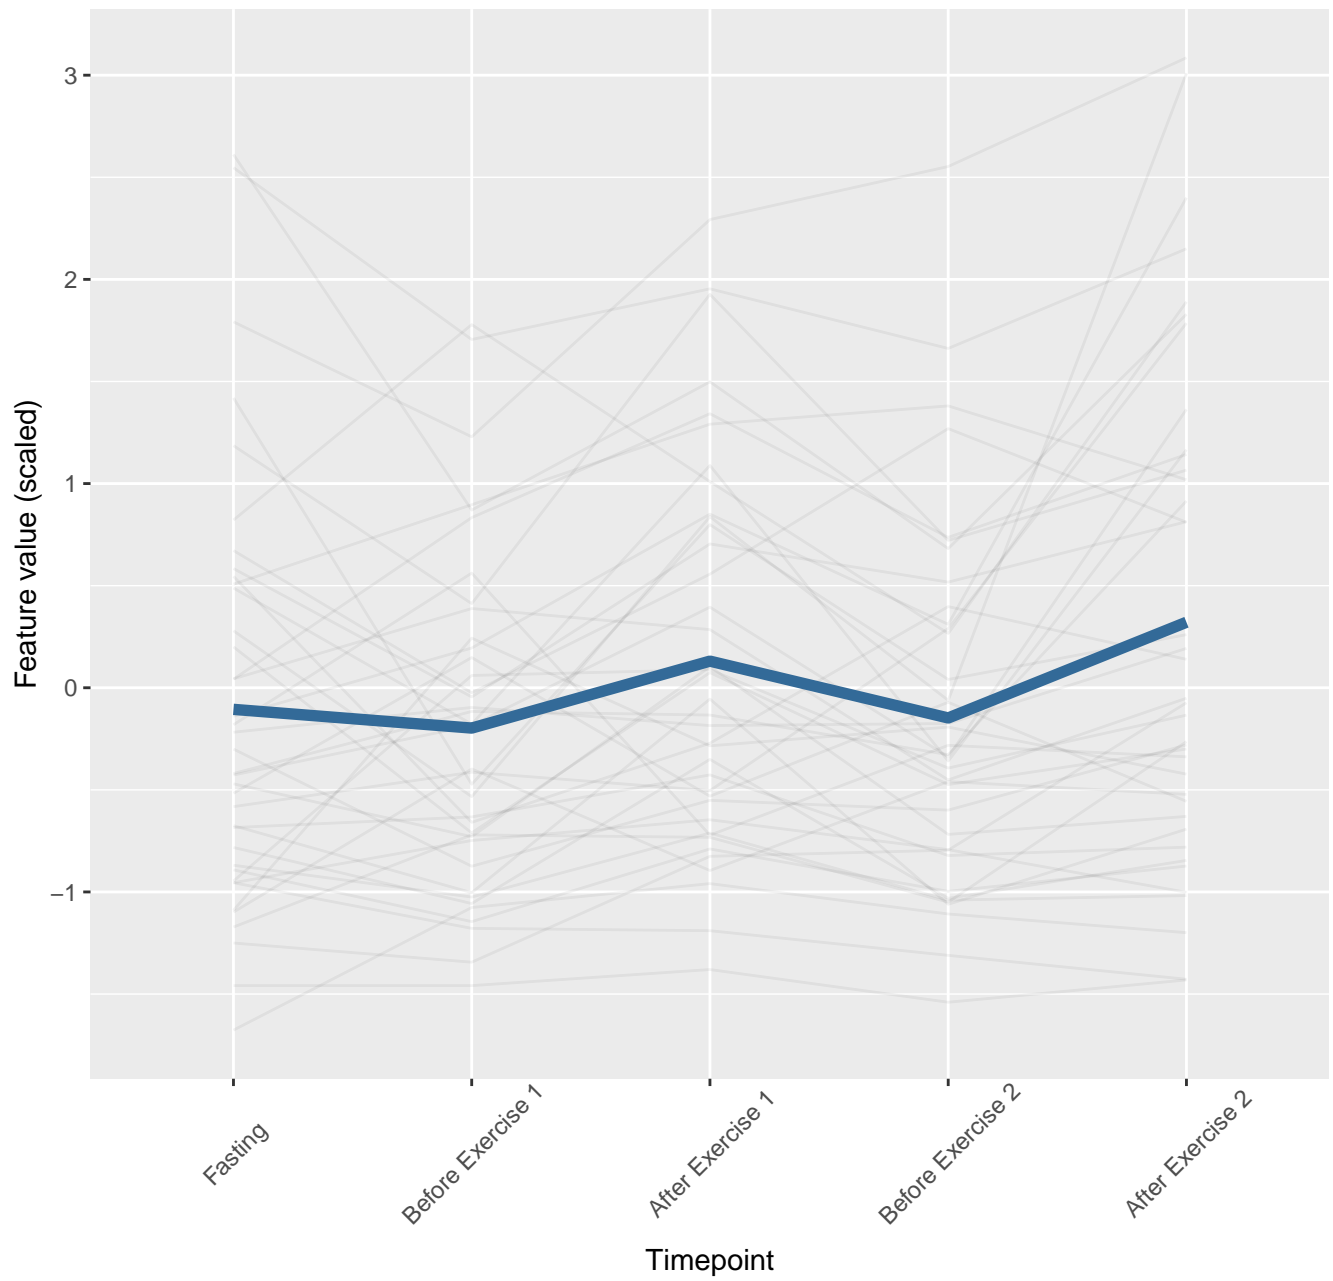



Line plot of PC(40:5)

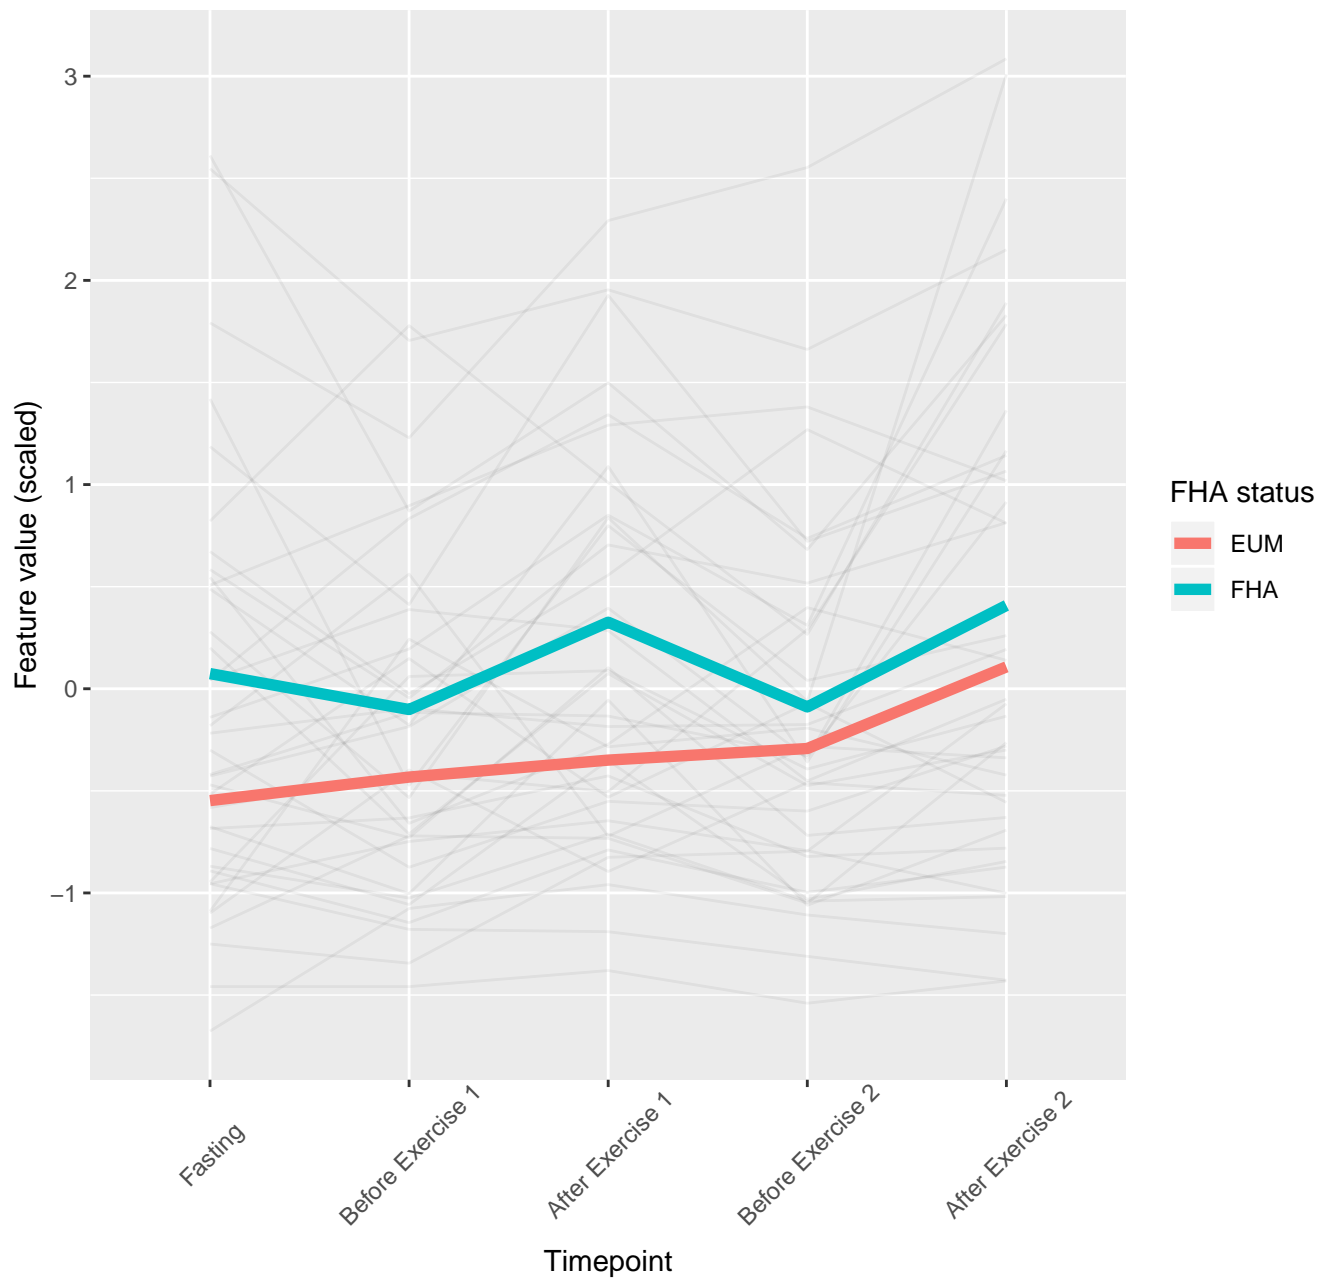

Line plot of PC(40:5)

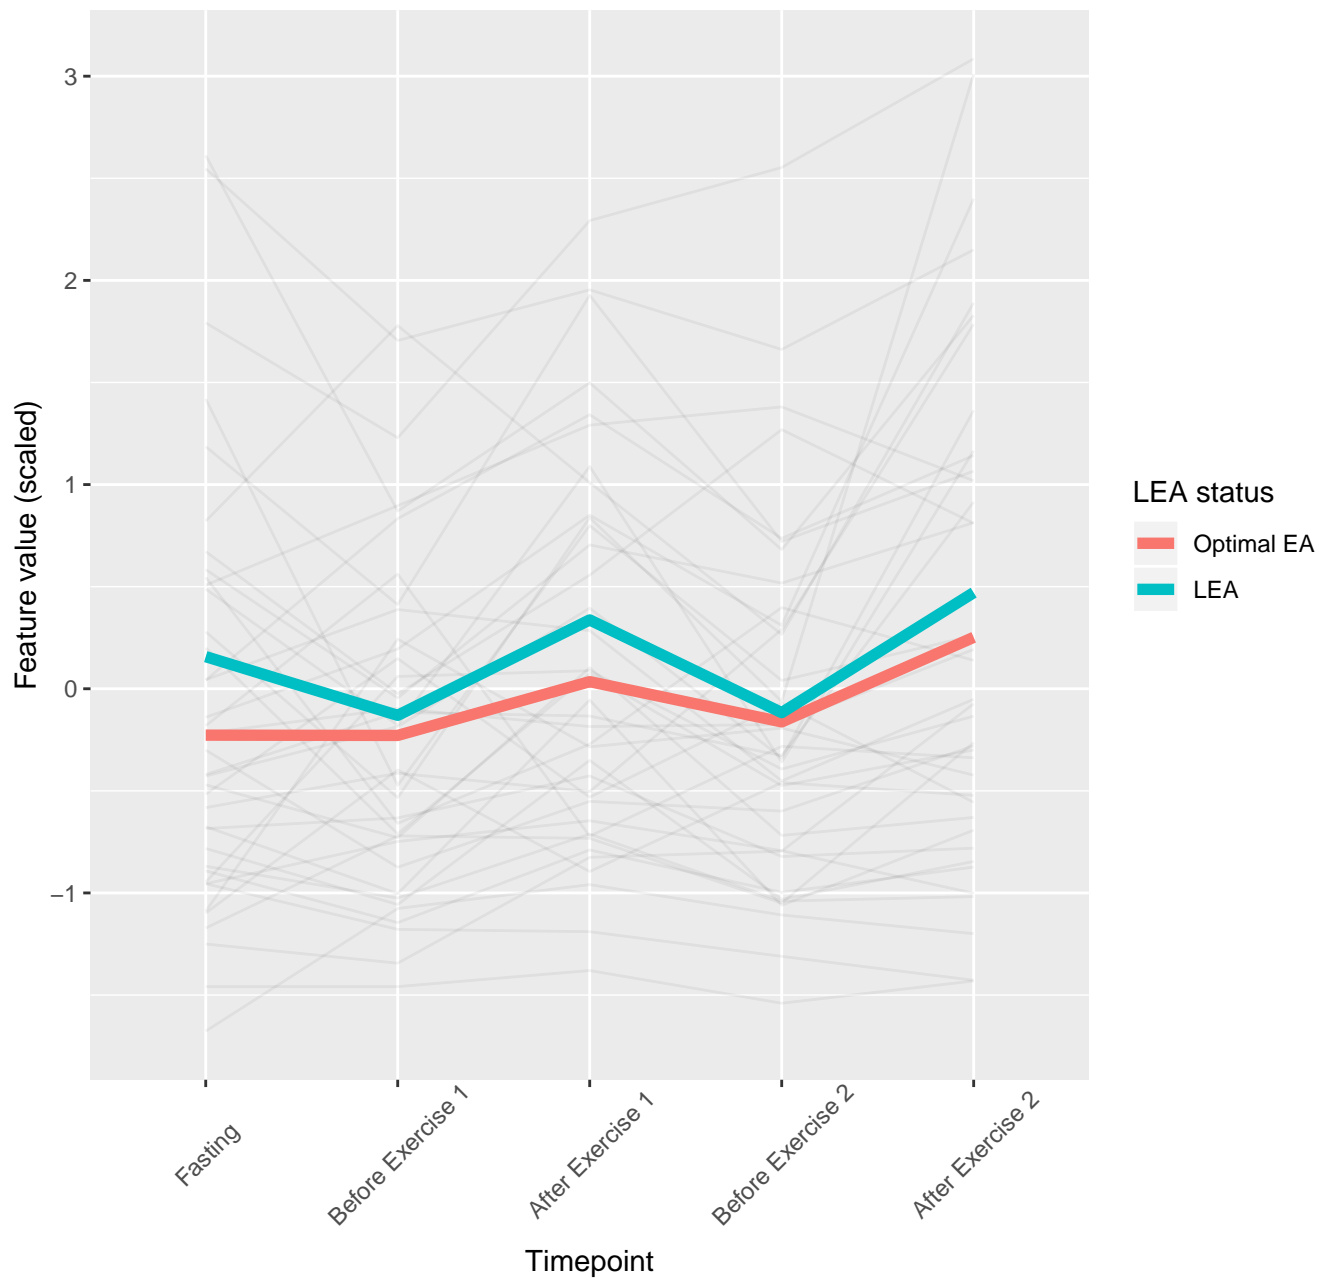

Line plot of PC(40:6)

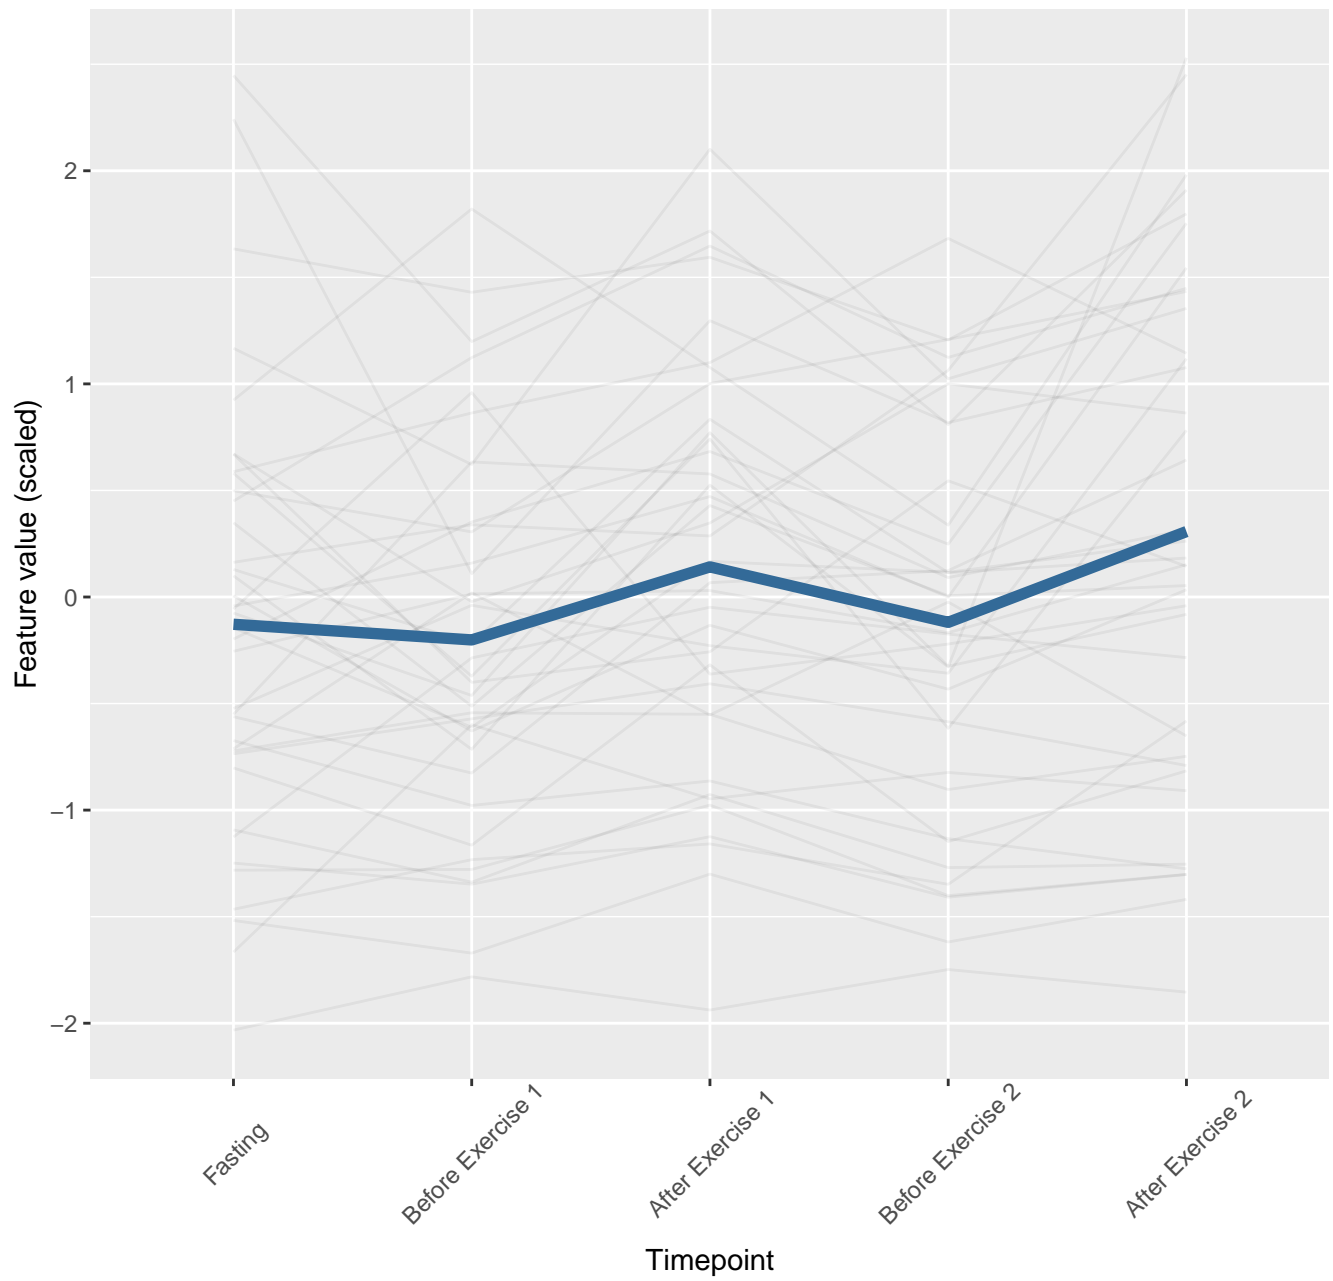

Line plot of PC(40:6)

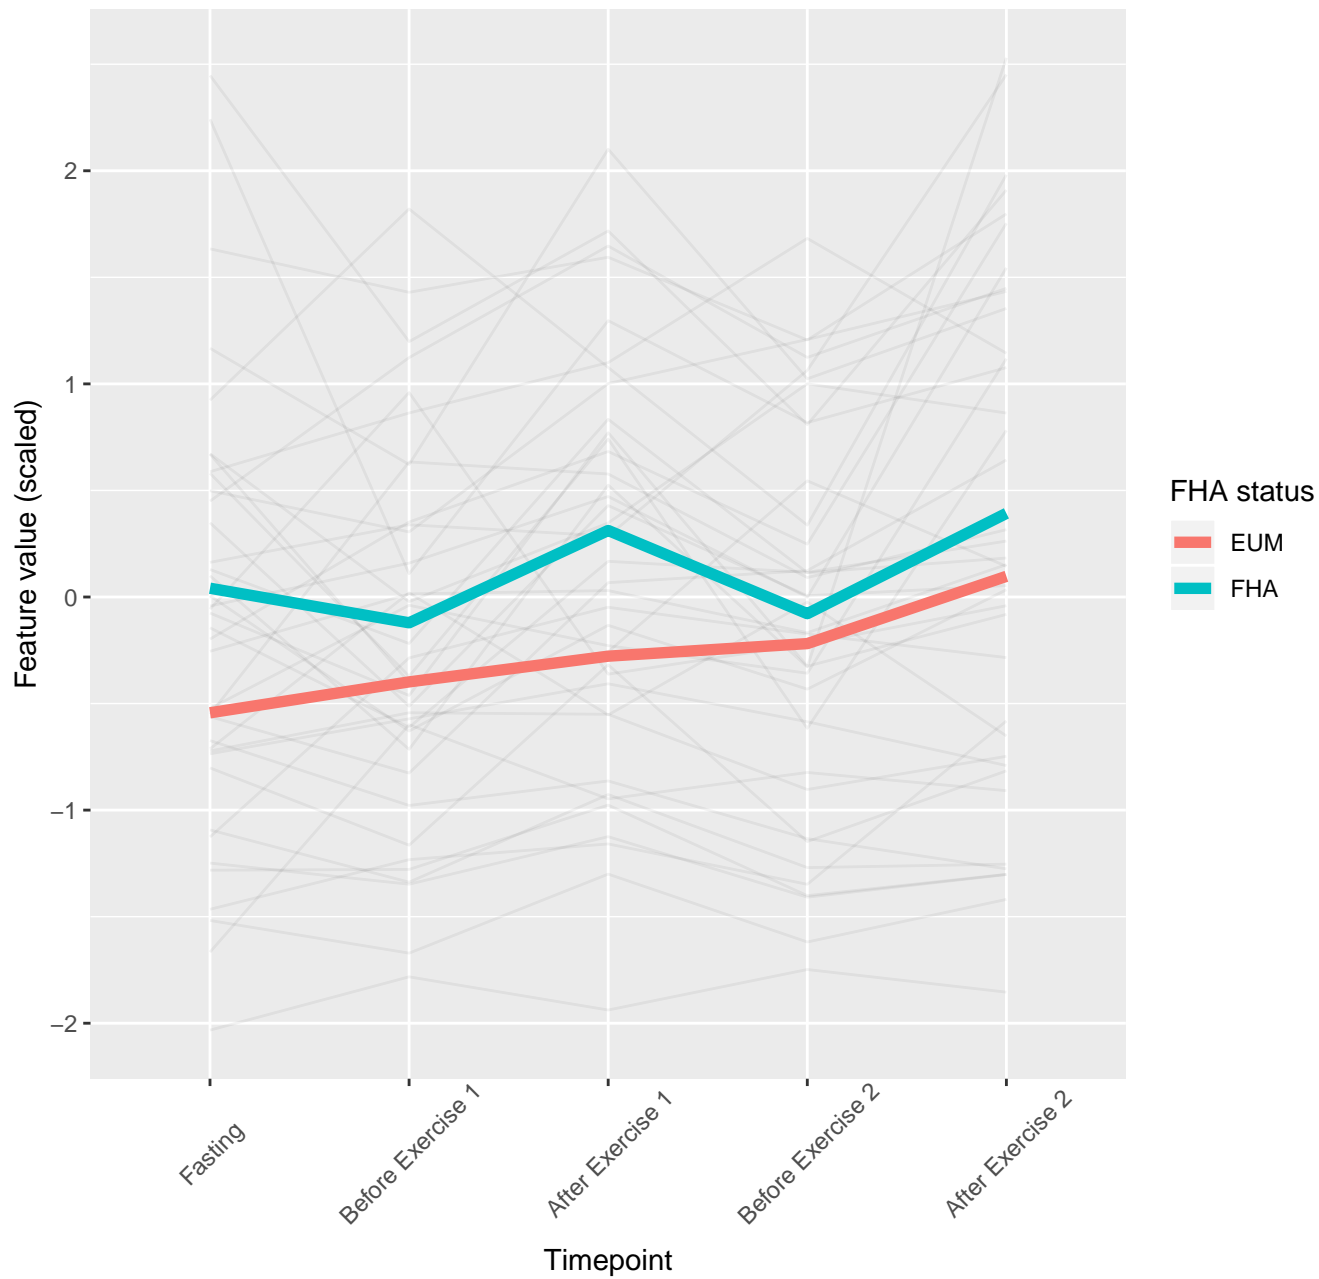

Line plot of PC(40:6)

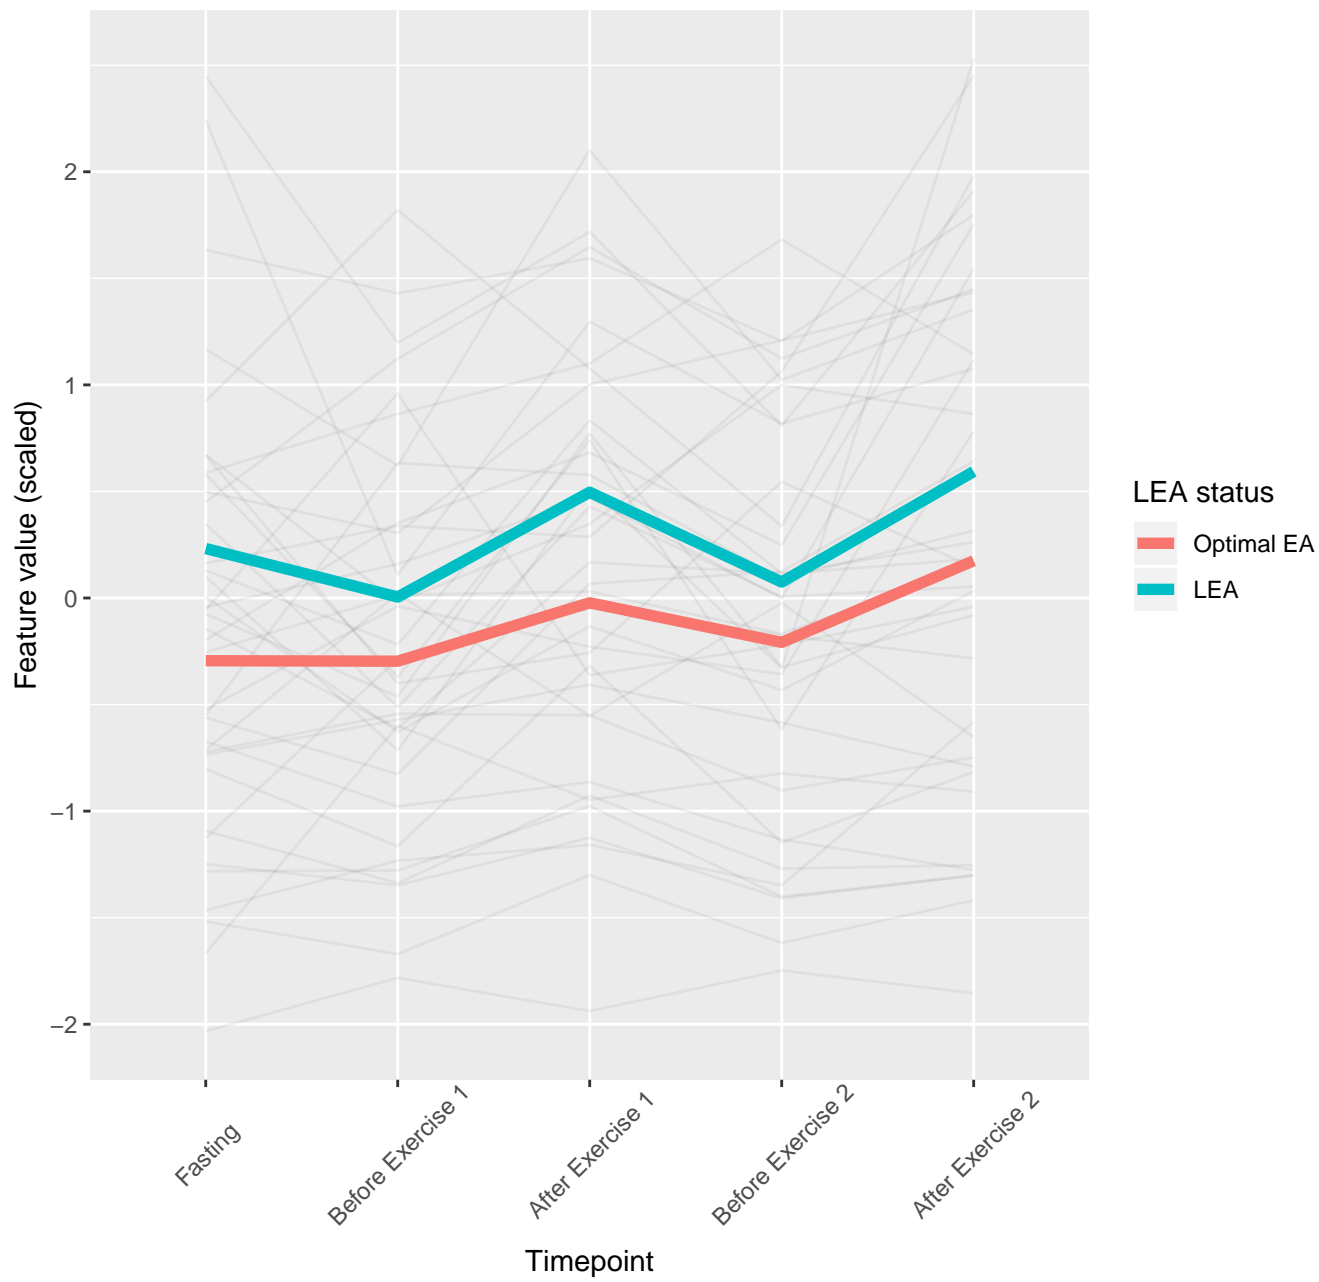

Line plot of PC(40:7)

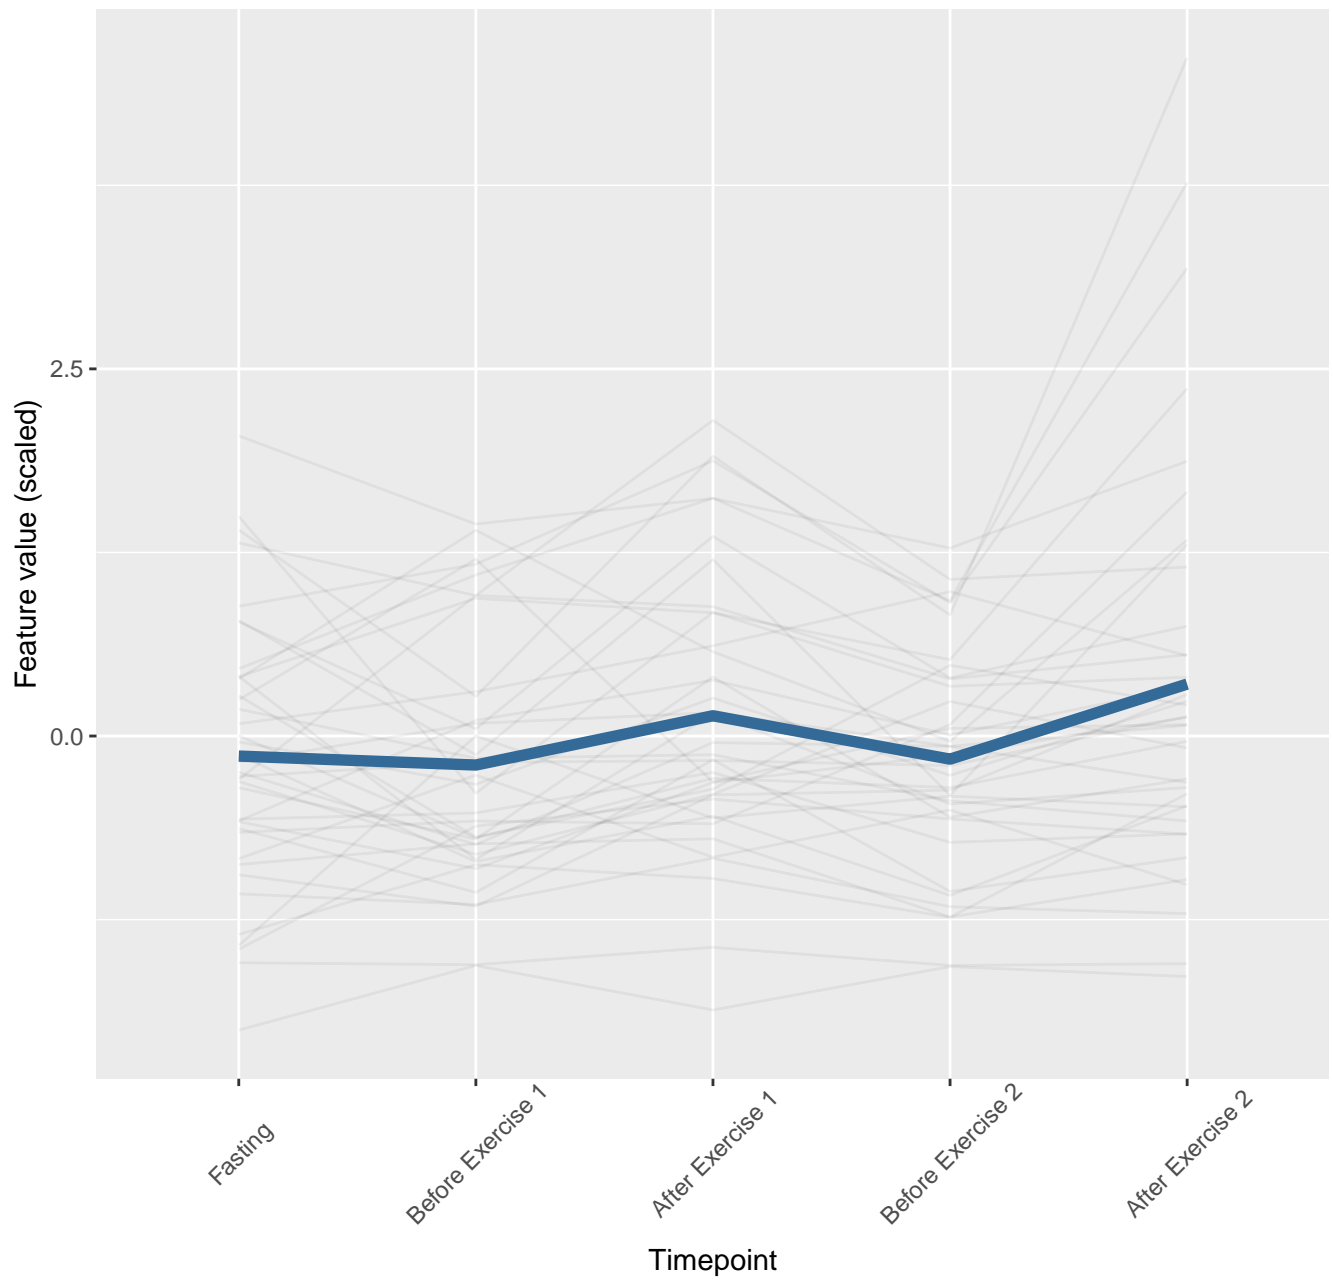

Line plot of PC(40:7)

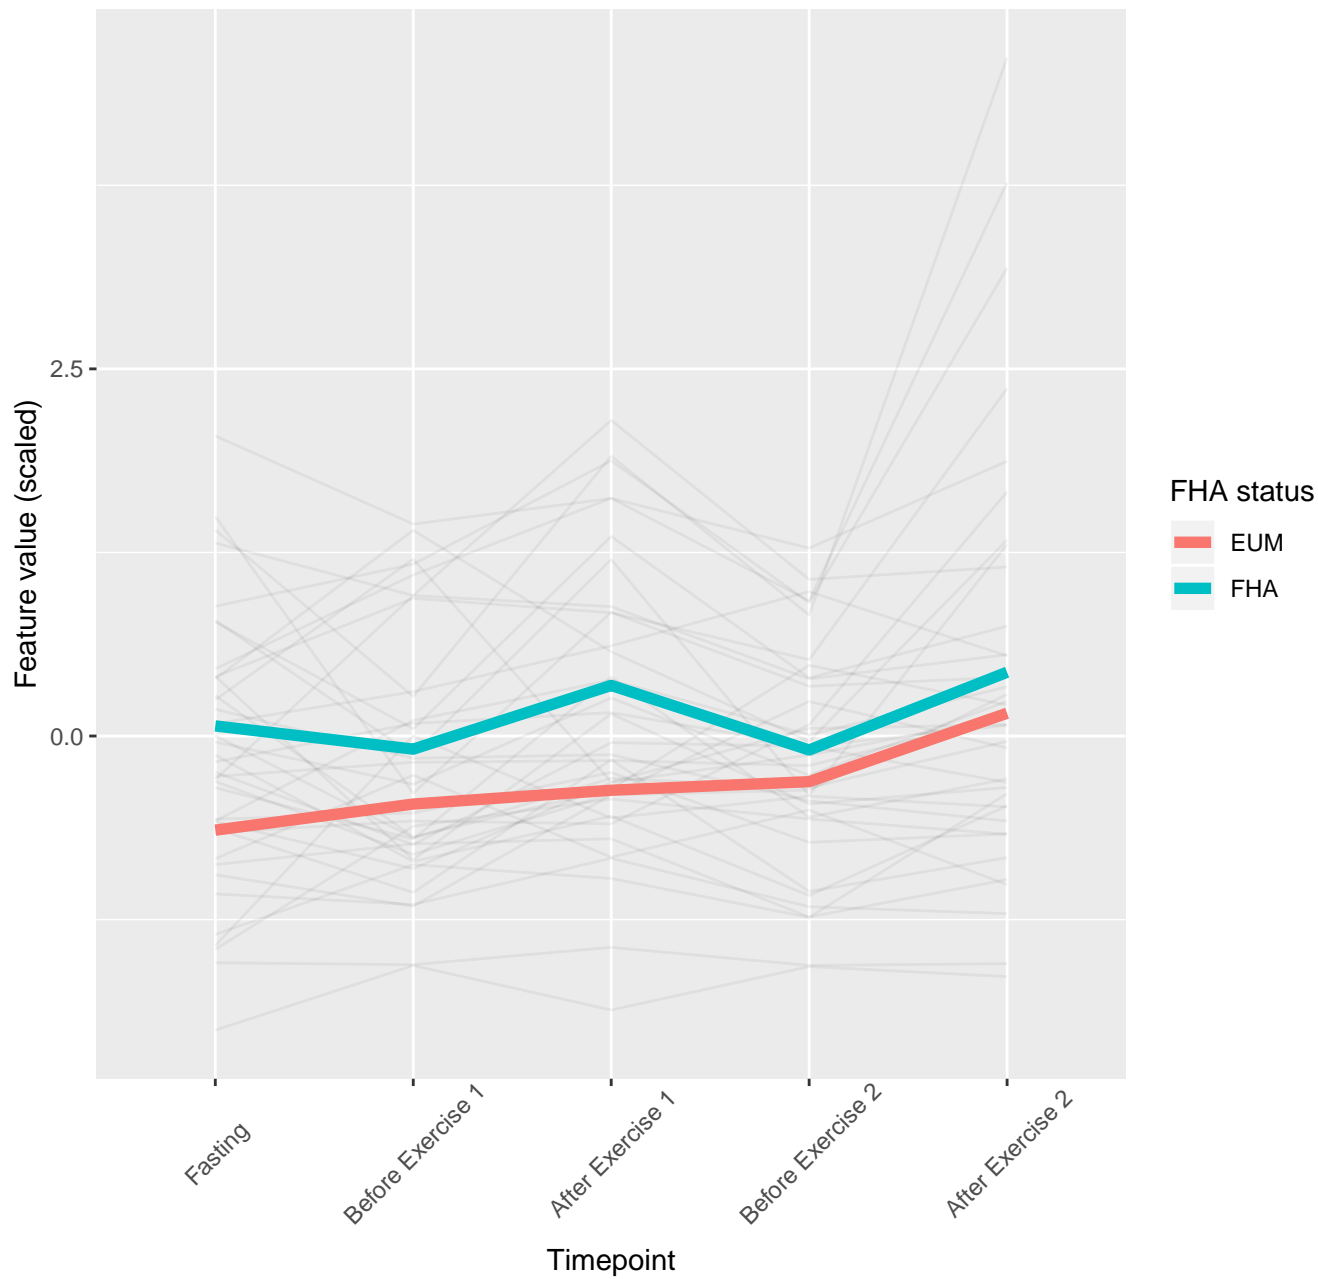

Line plot of PC(40:7)

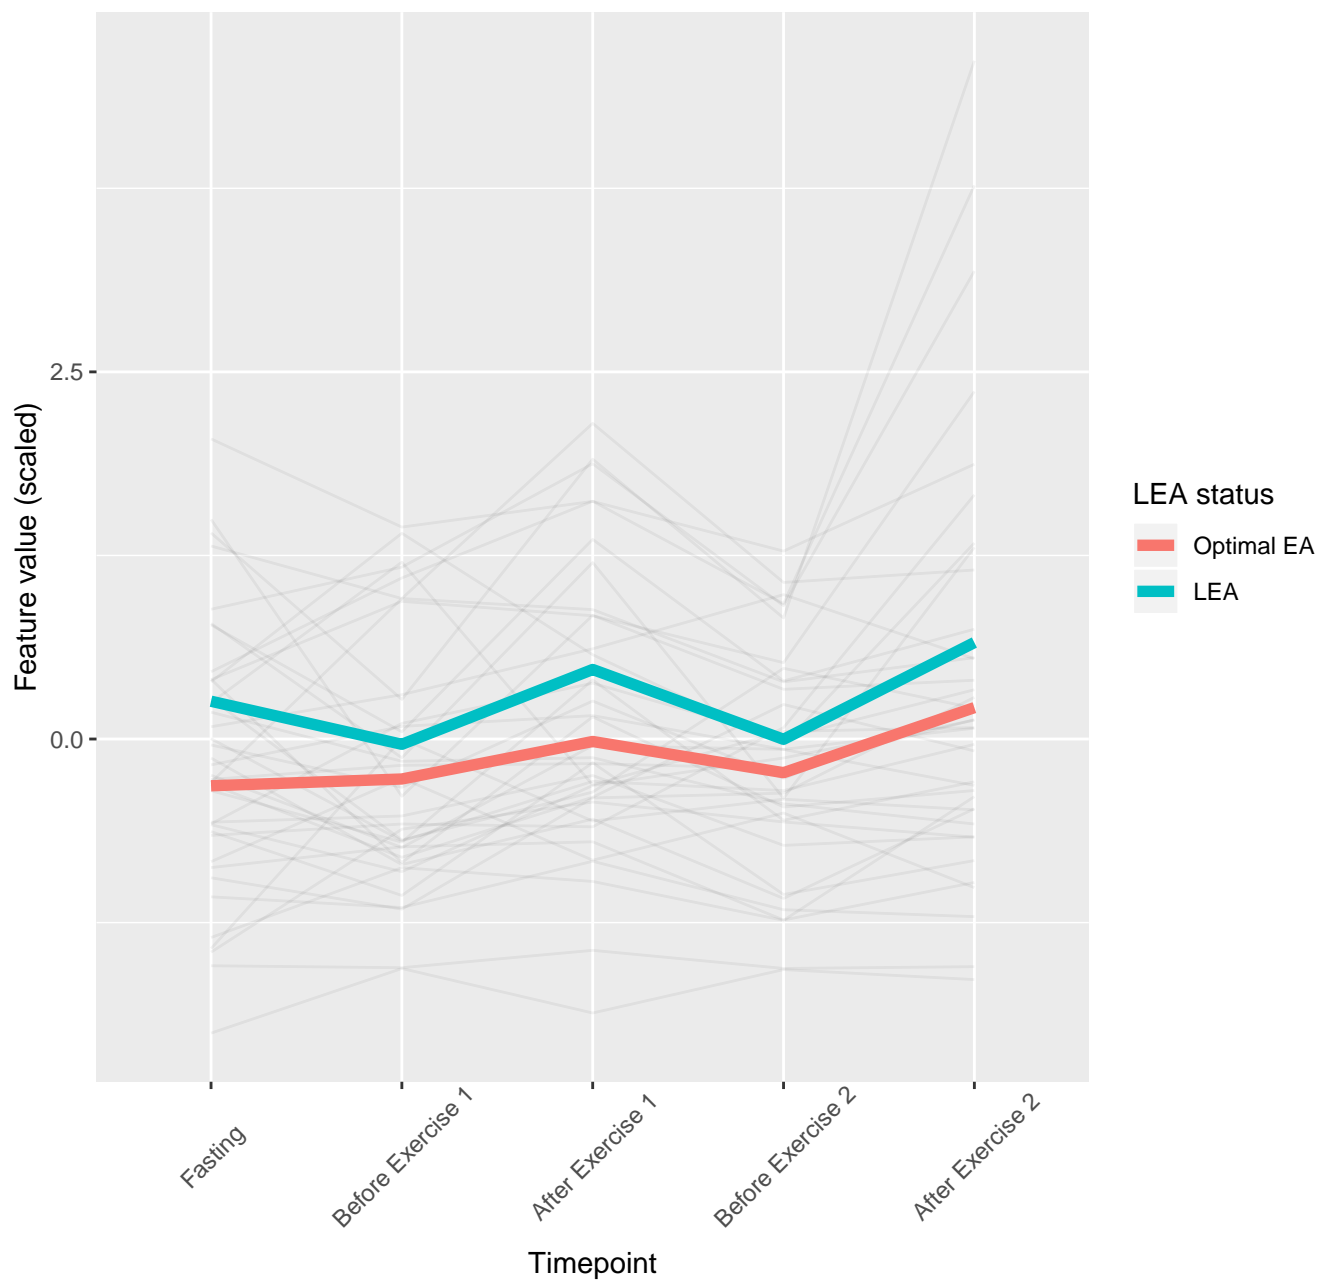



Line plot of PC(40:8)

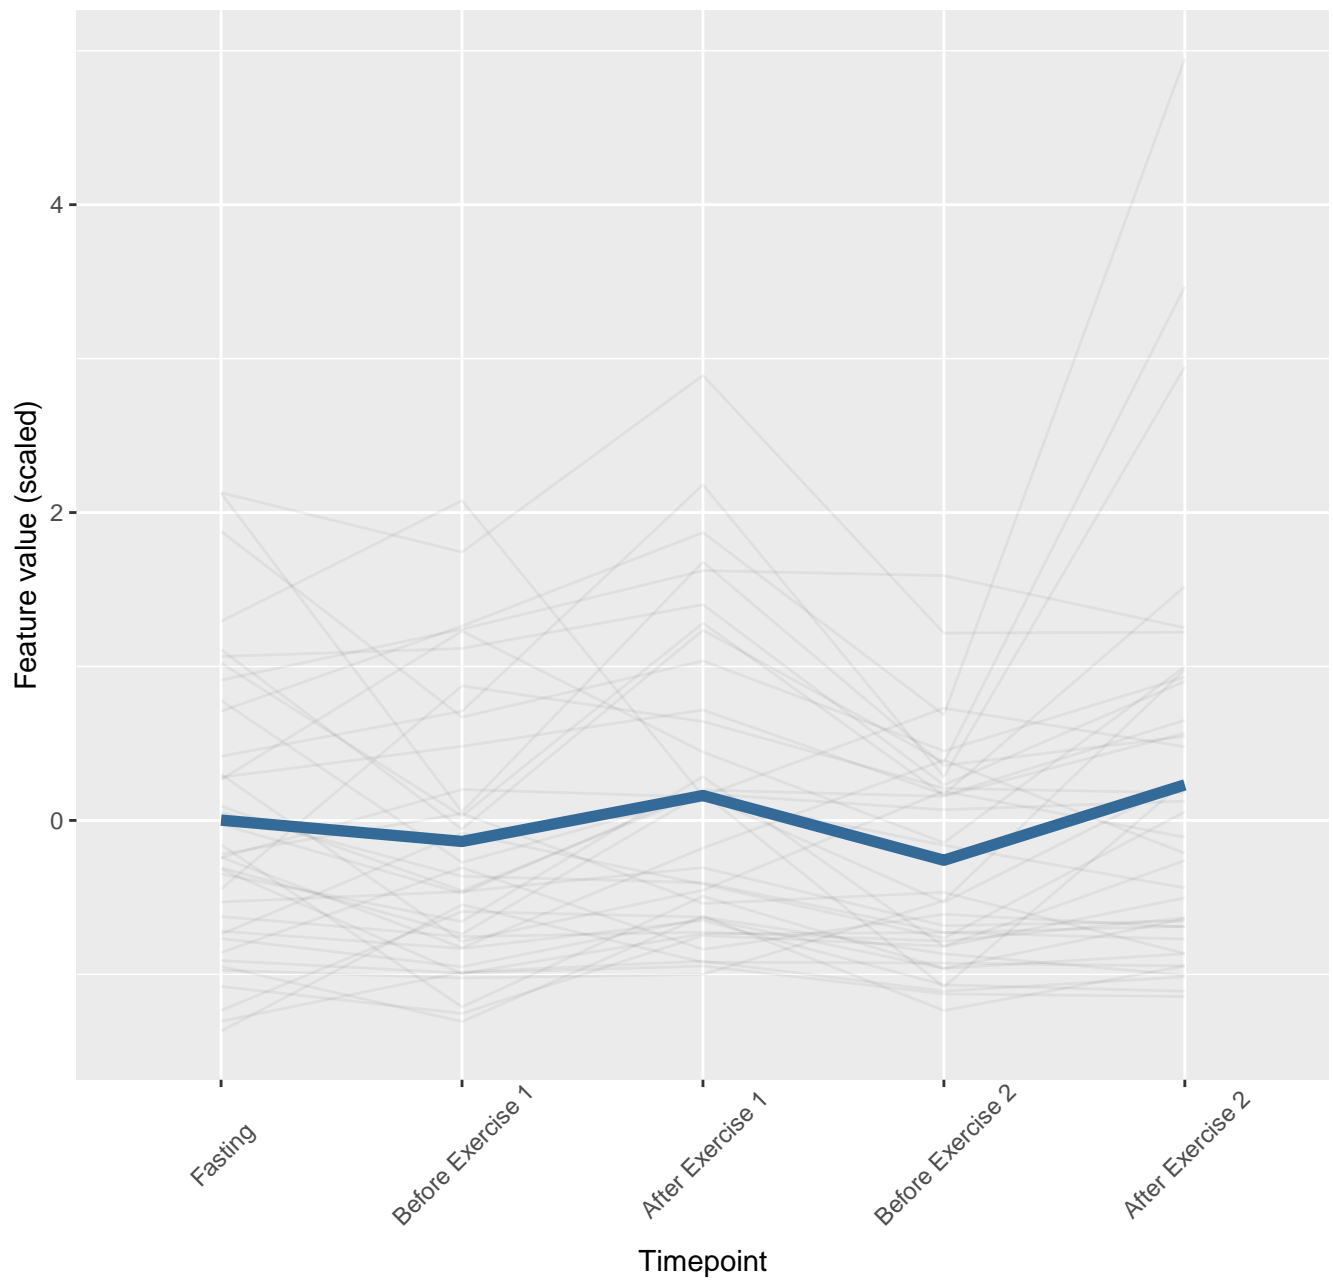

Line plot of PC(40:8)

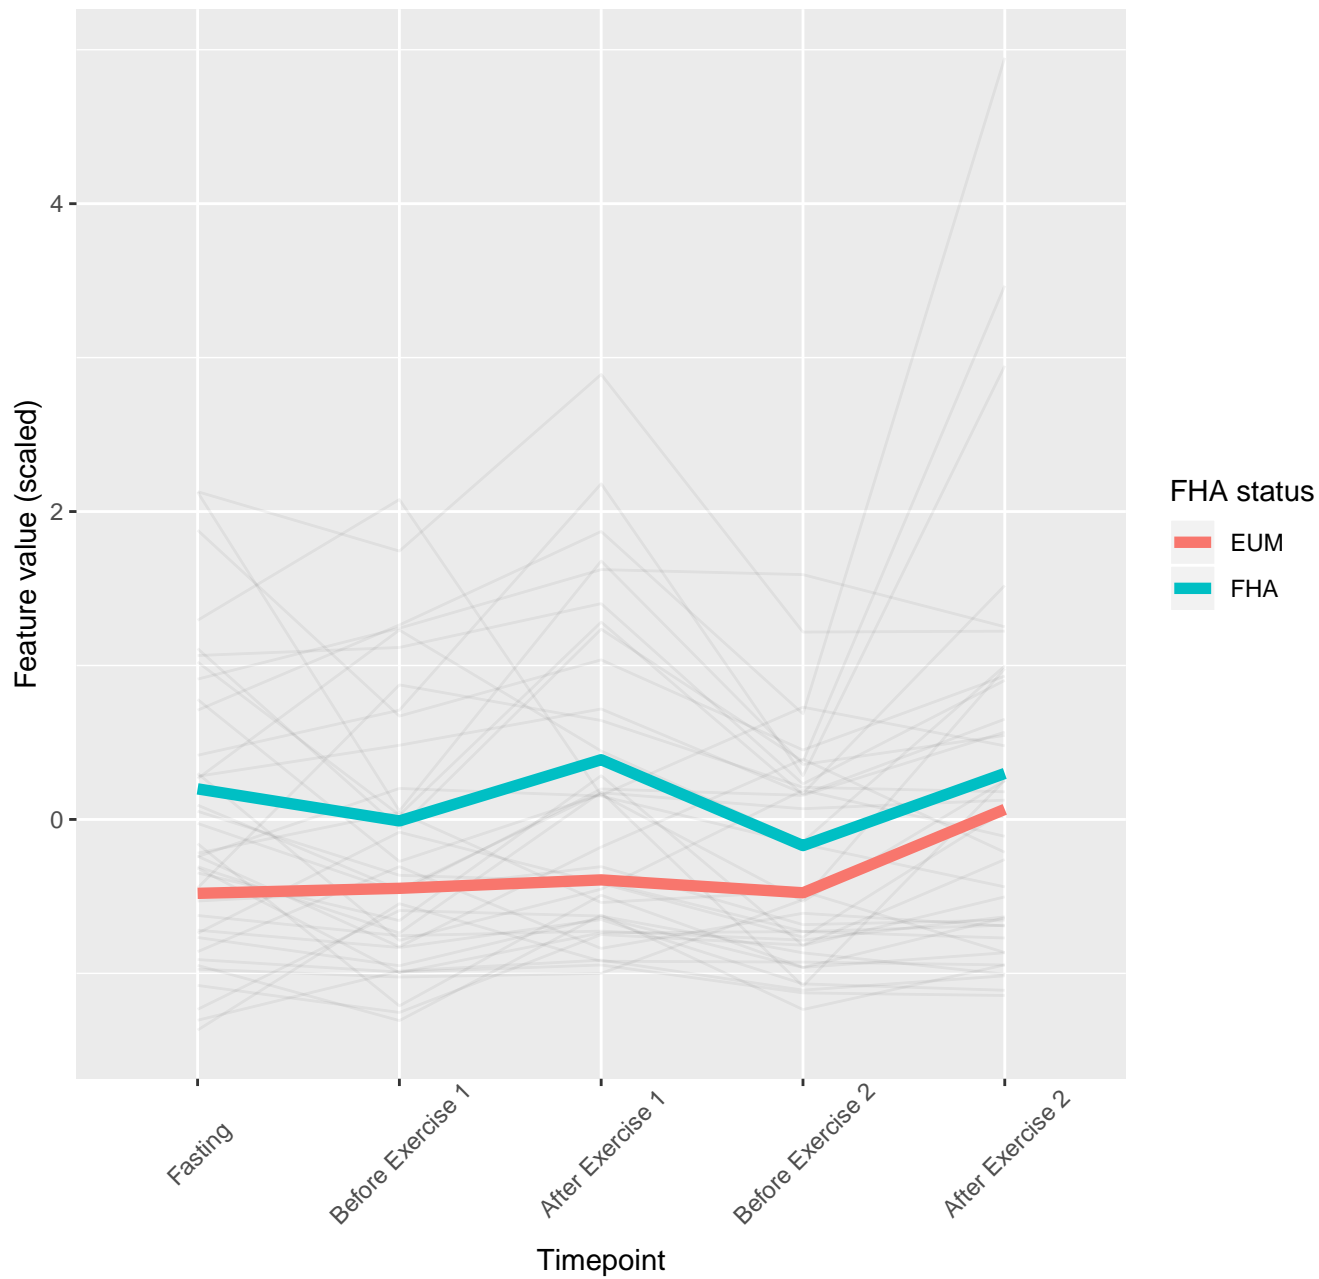

Line plot of PC(40:8)

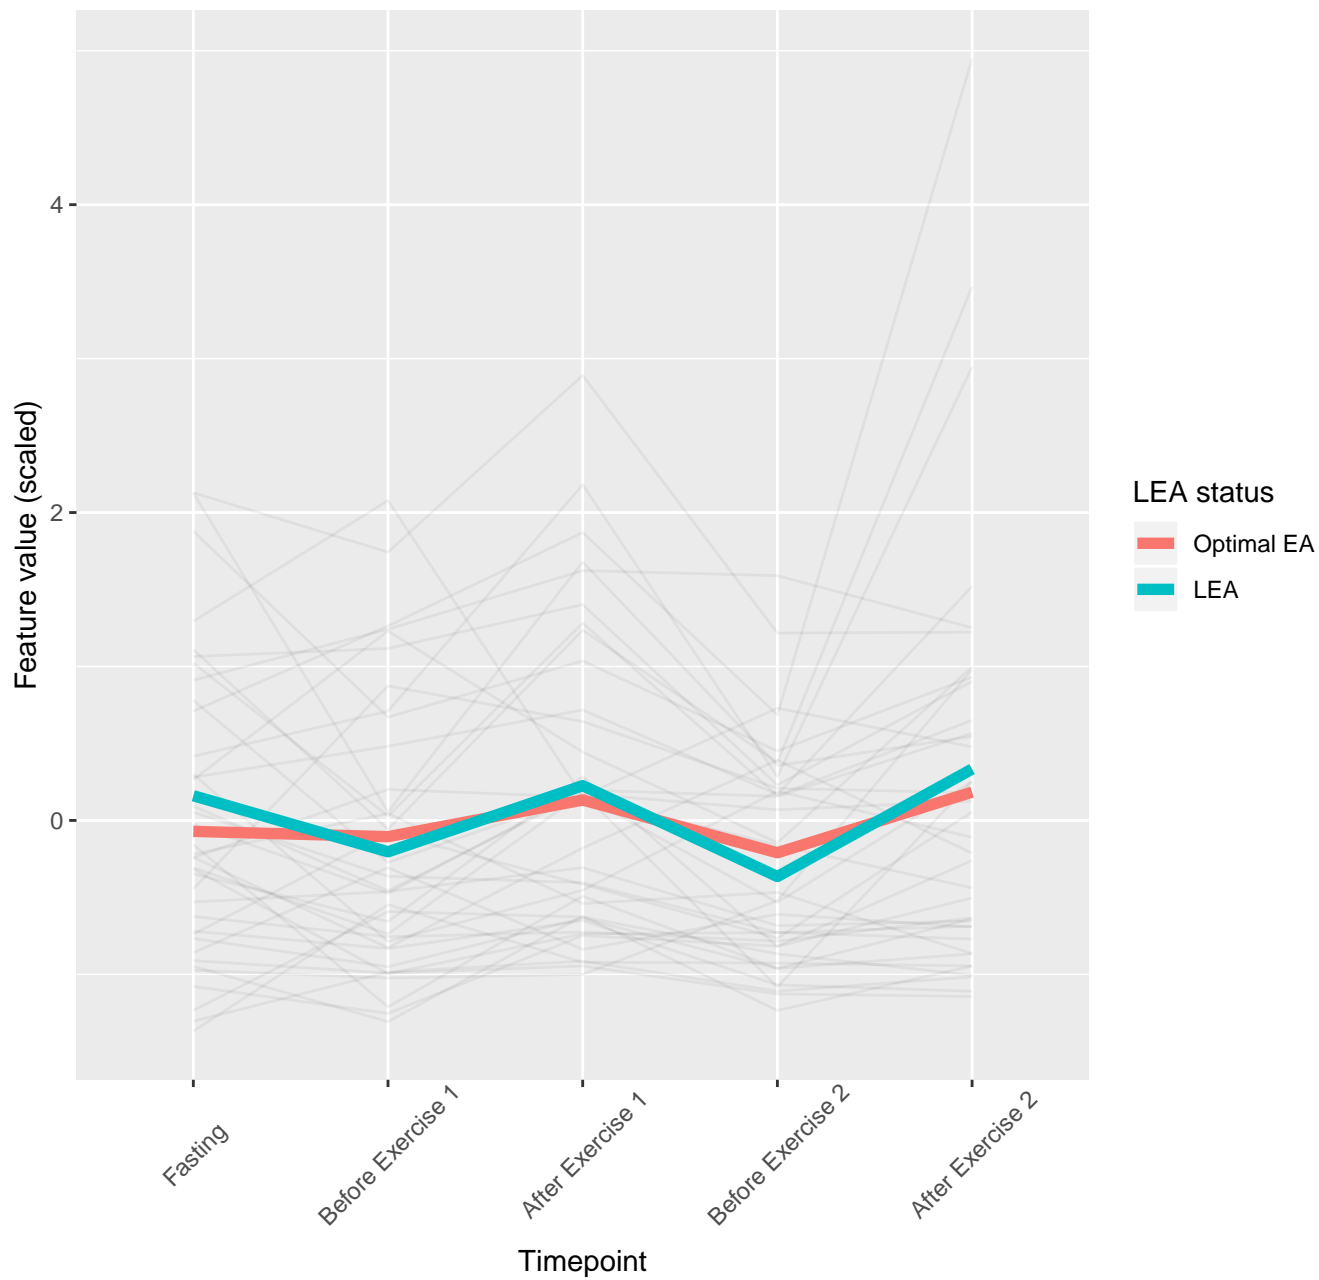

Line plot of PC(42:5)

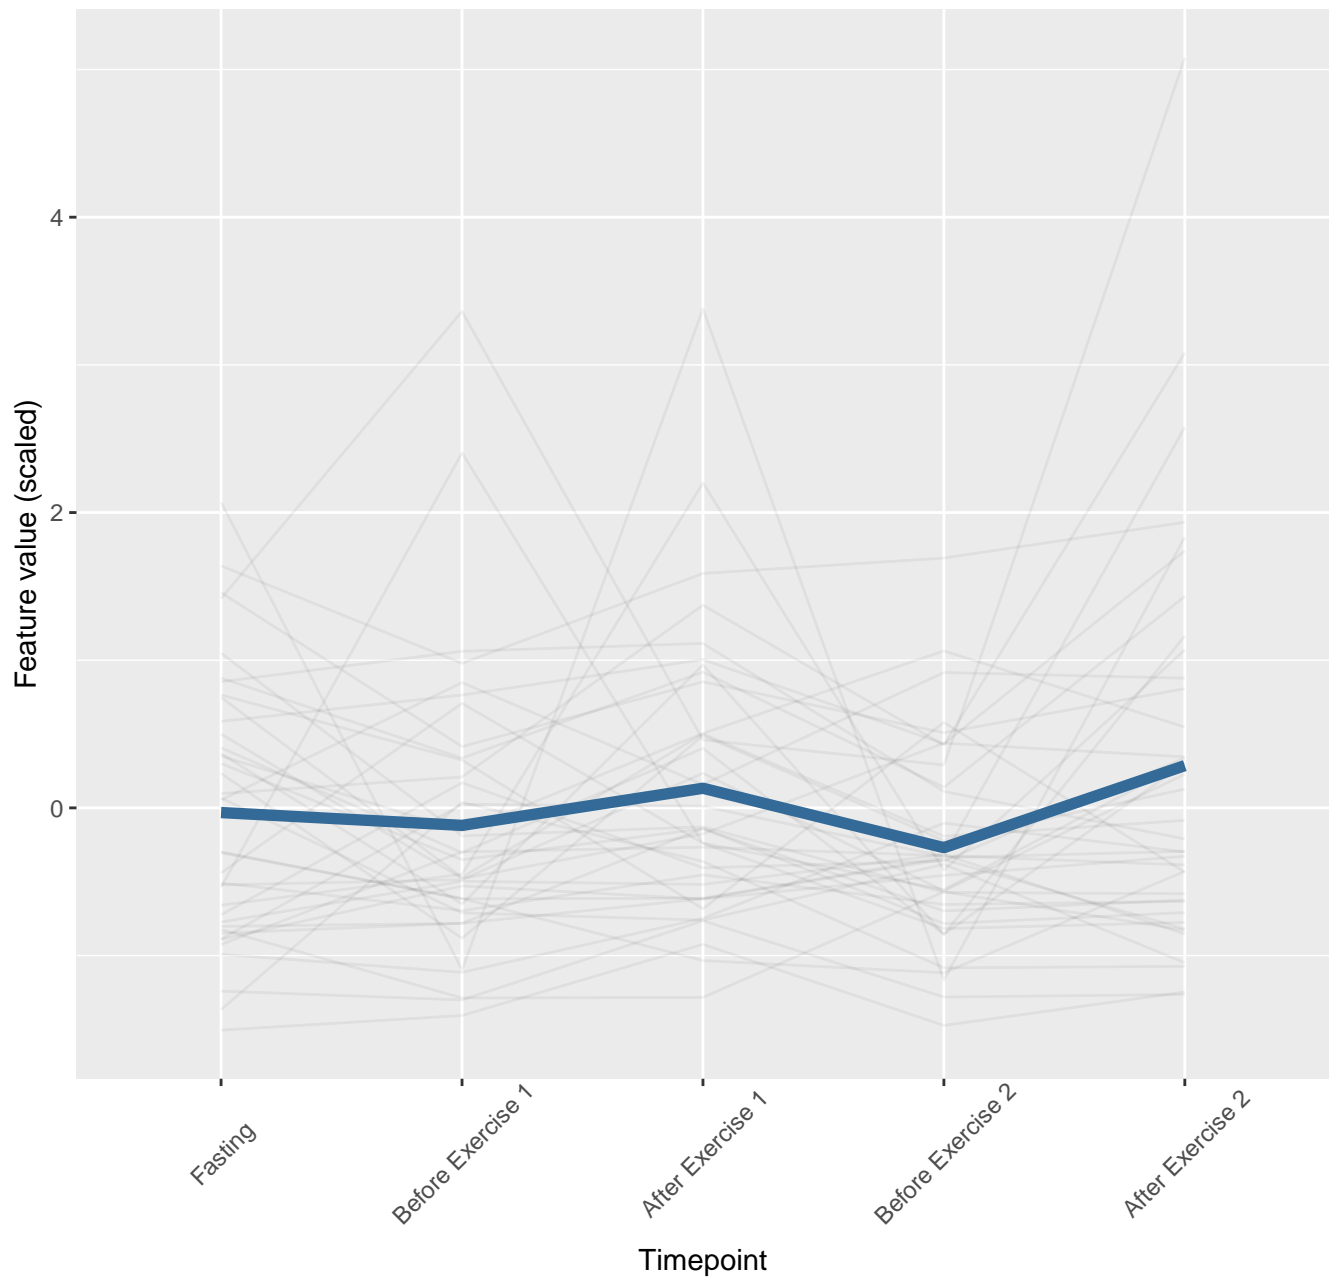

Line plot of PC(42:5)

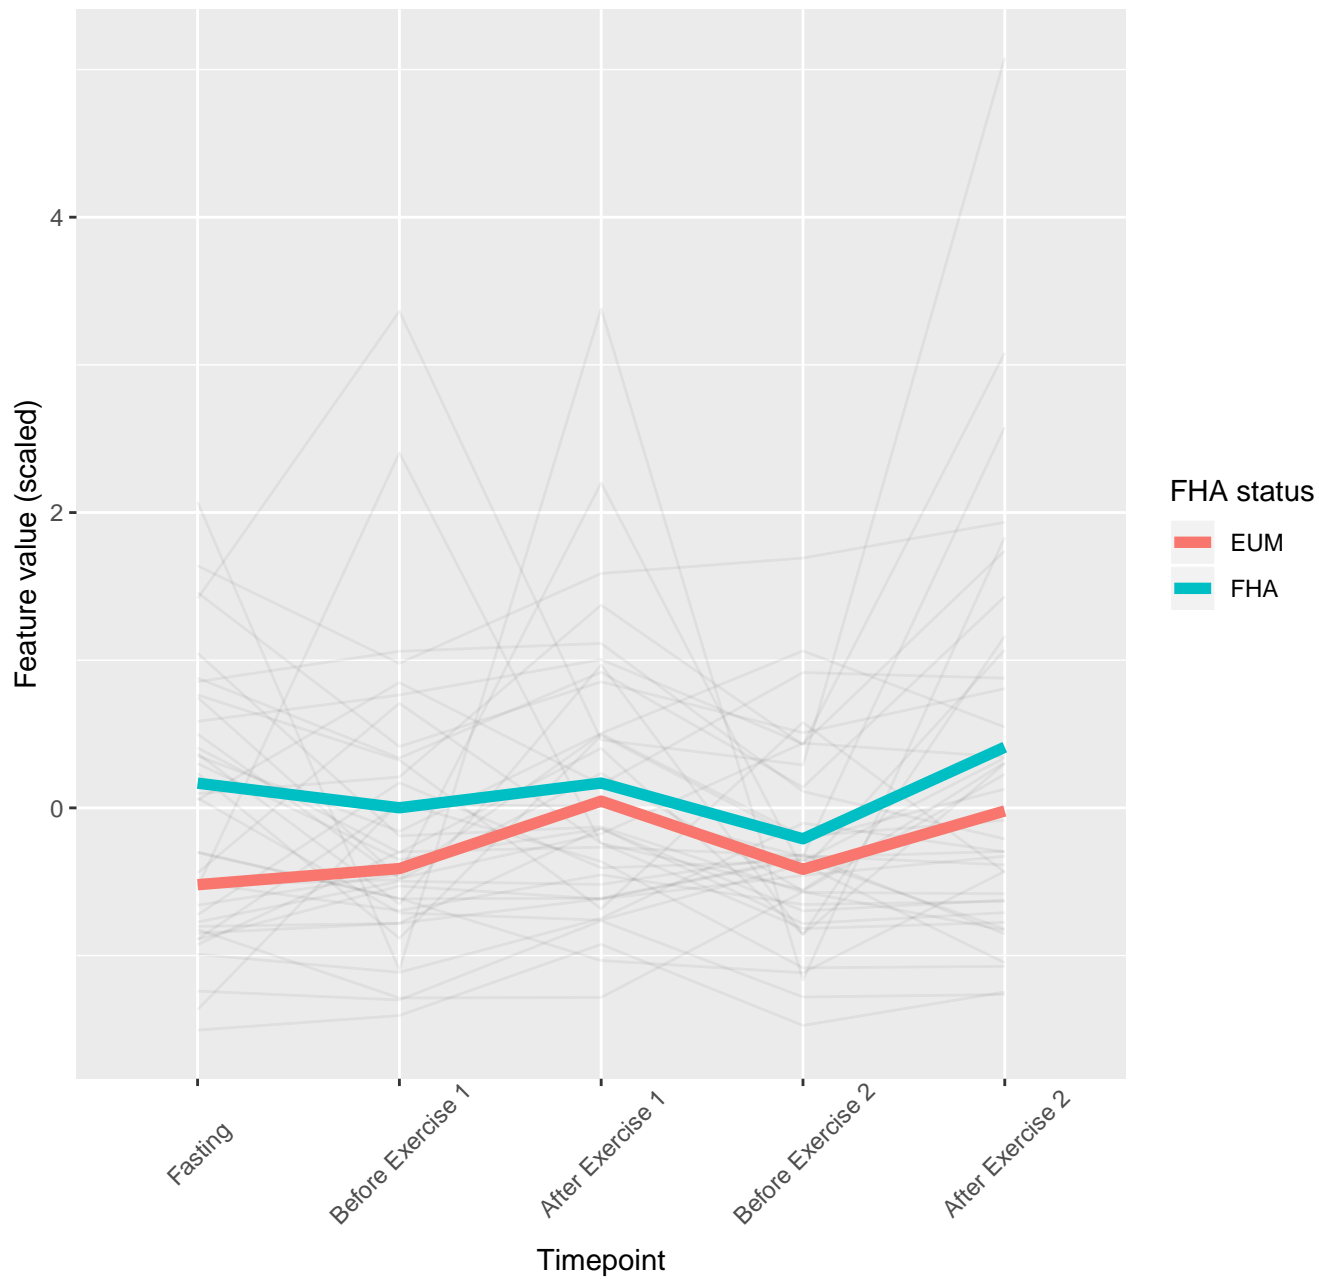

Line plot of PC(42:5)

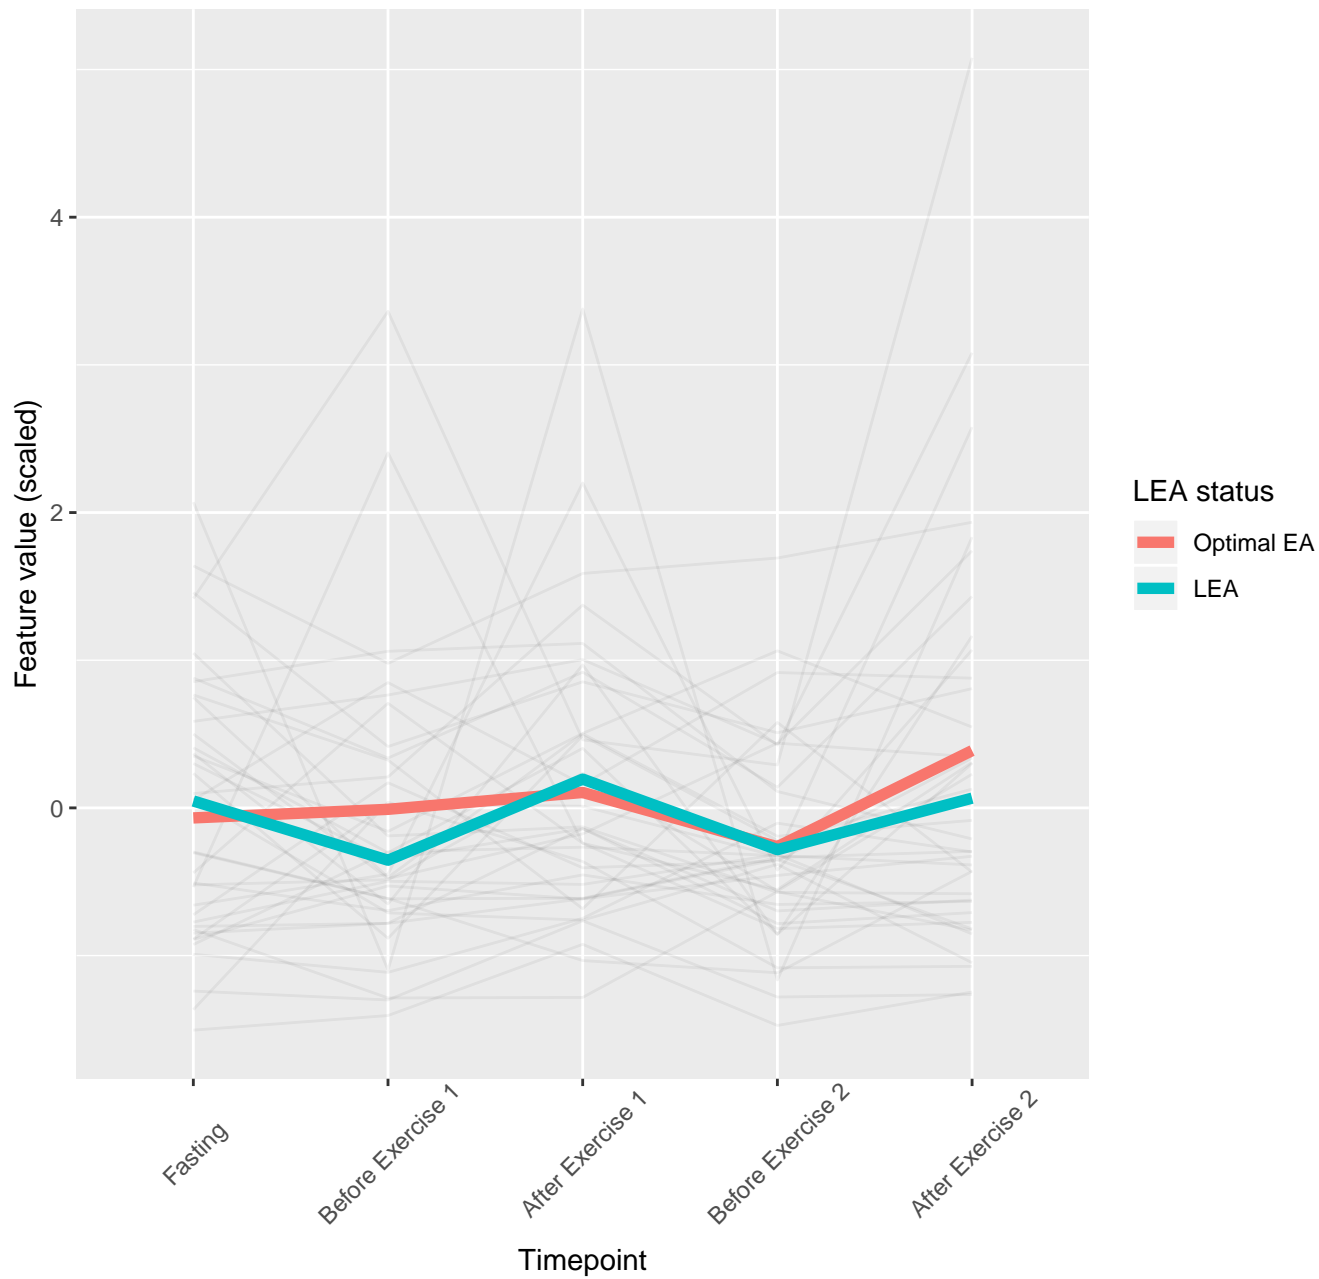

Line plot of PC(42:6)

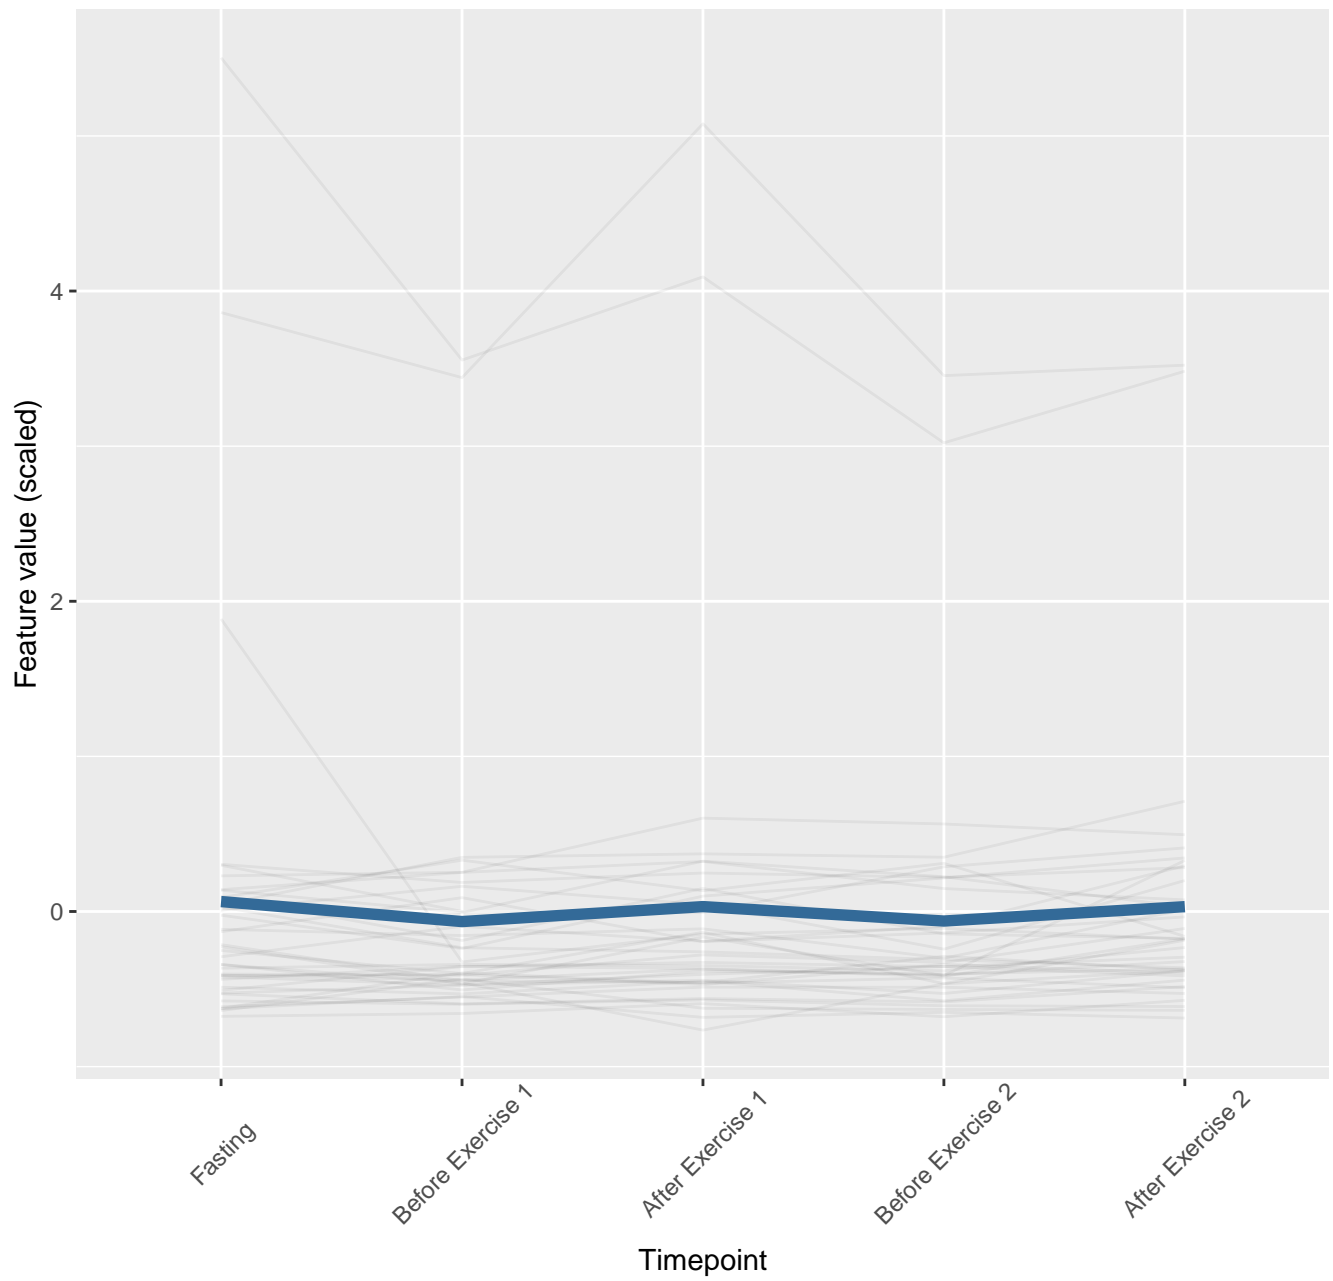

Line plot of PC(42:6)

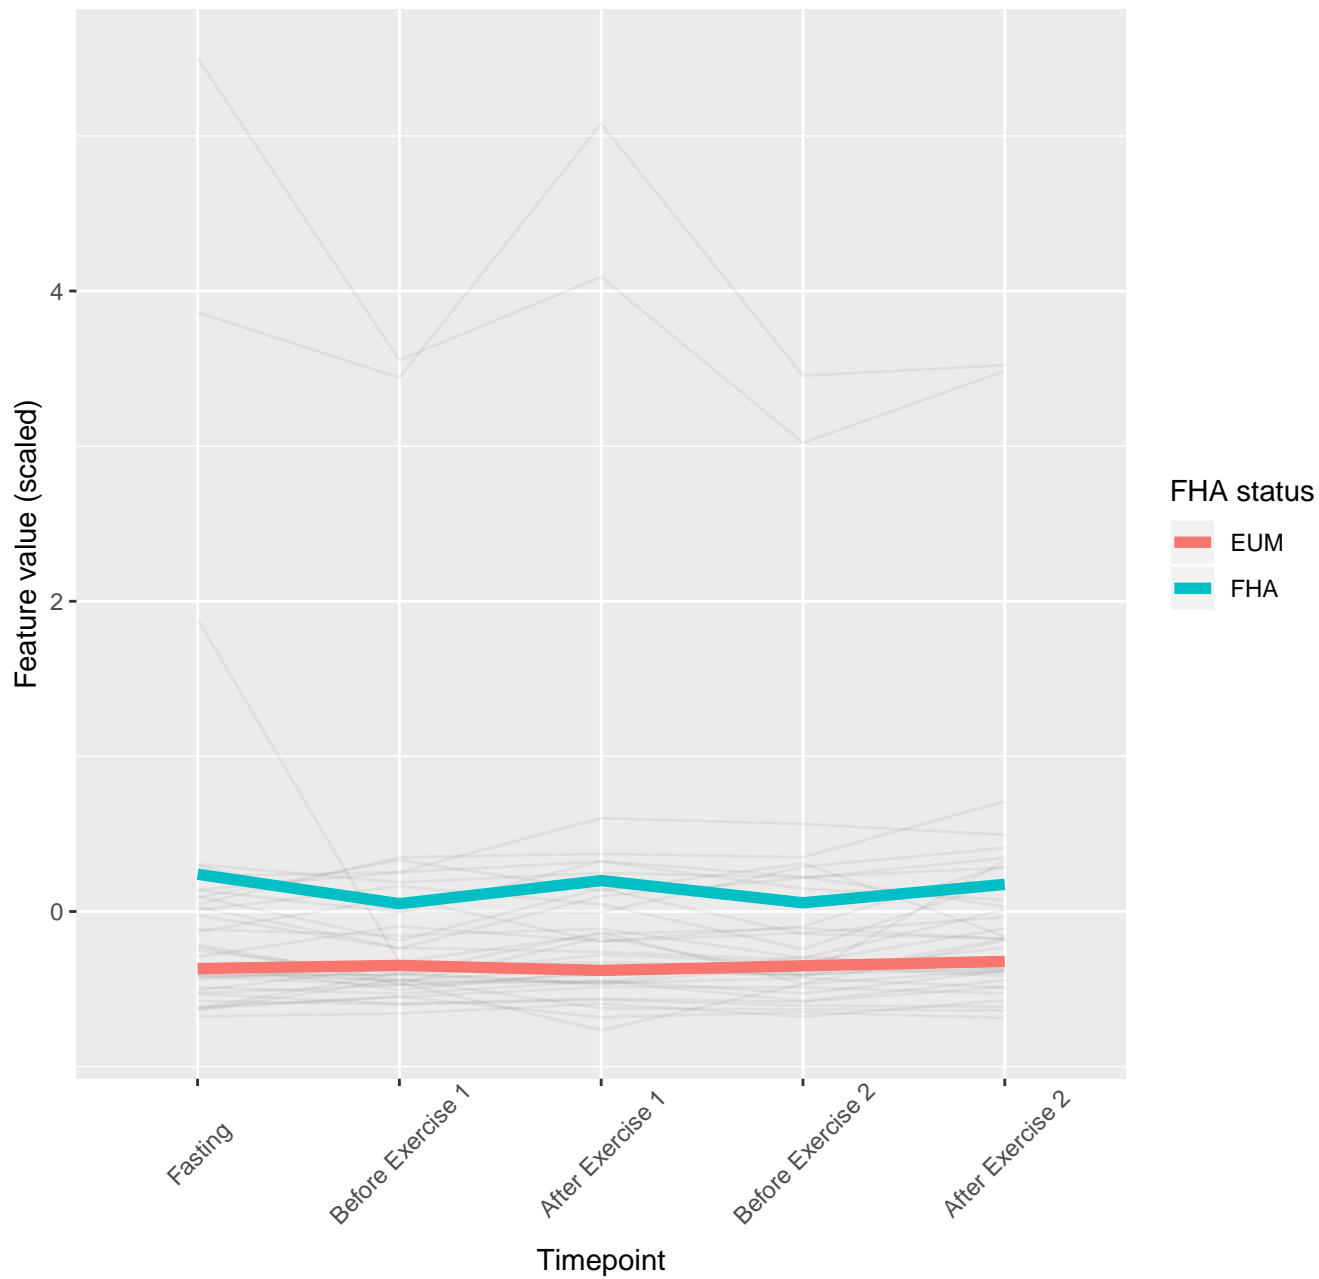



Line plot of PC(42:6)

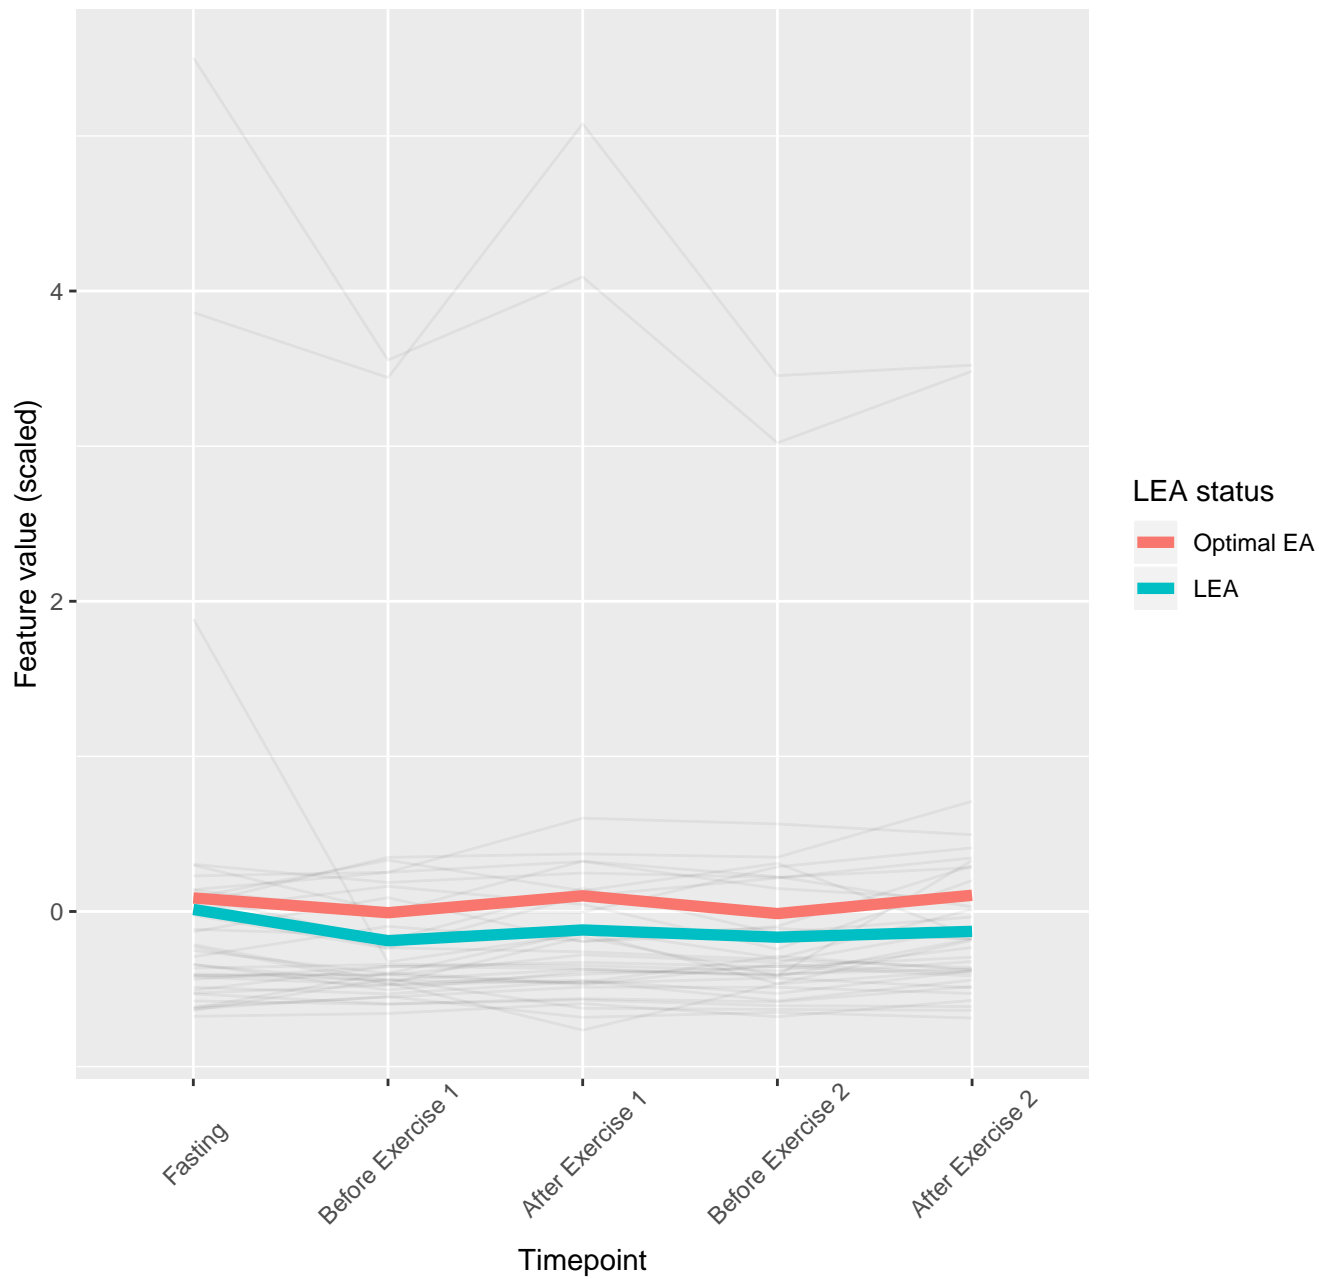

Line plot of PC(O-20:0/22:4)

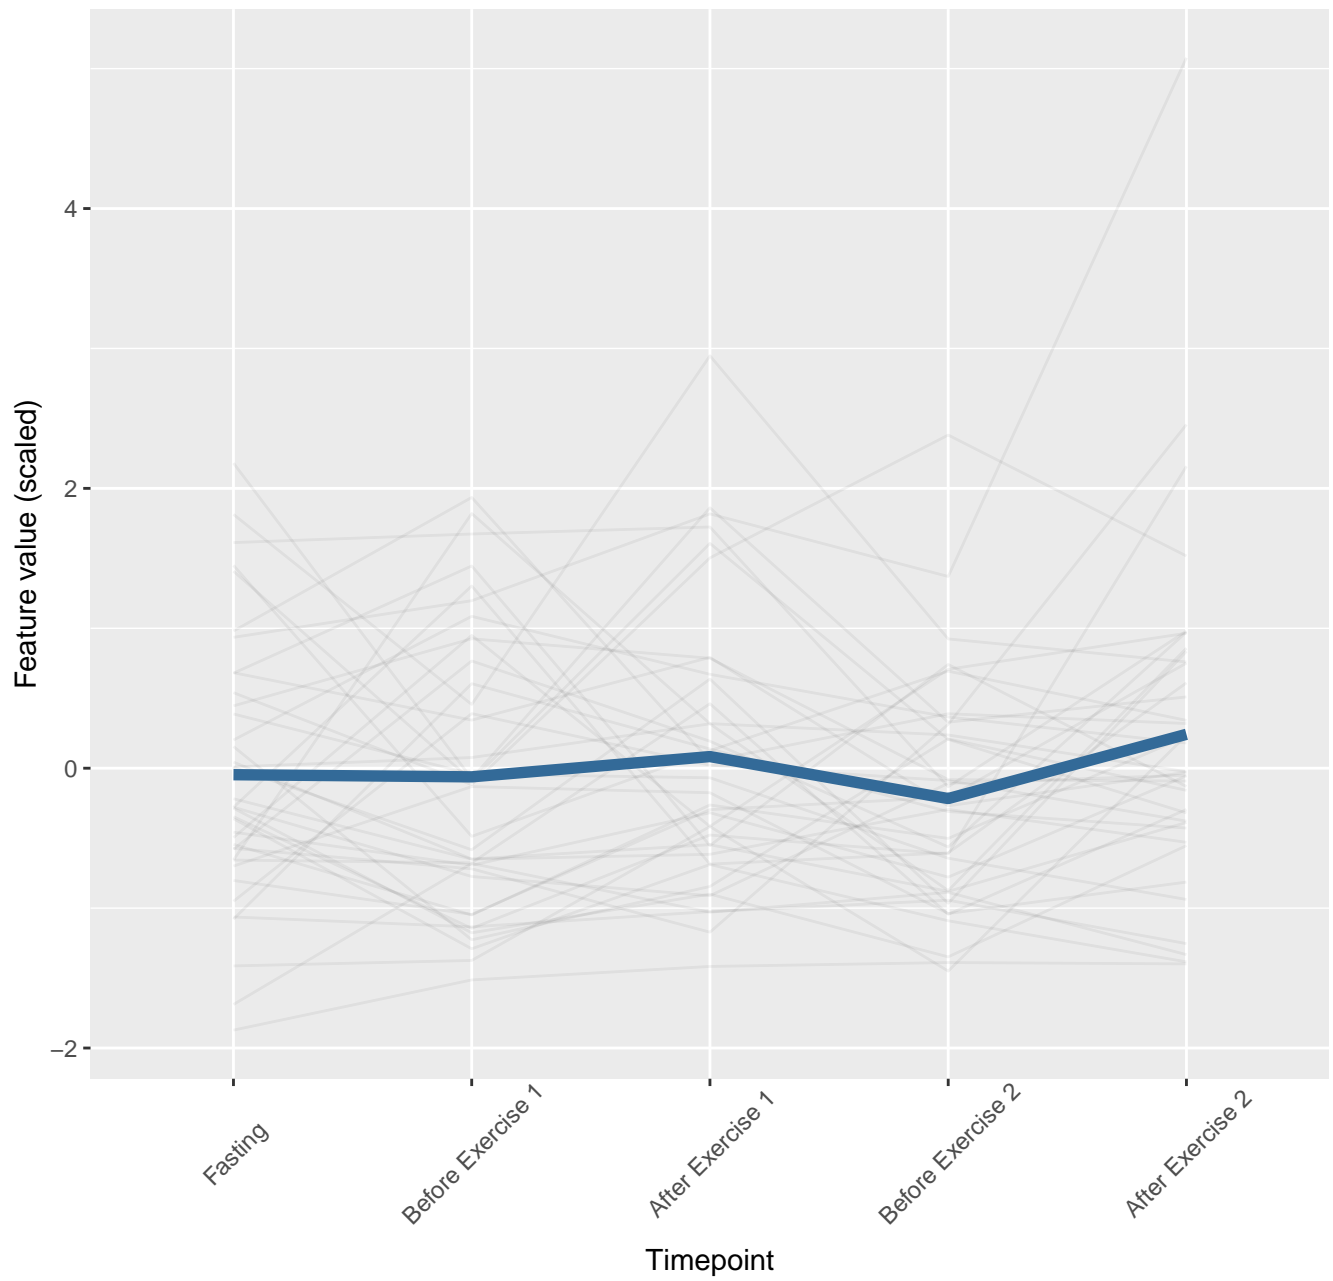

Line plot of PC(O-20:0/22:4)

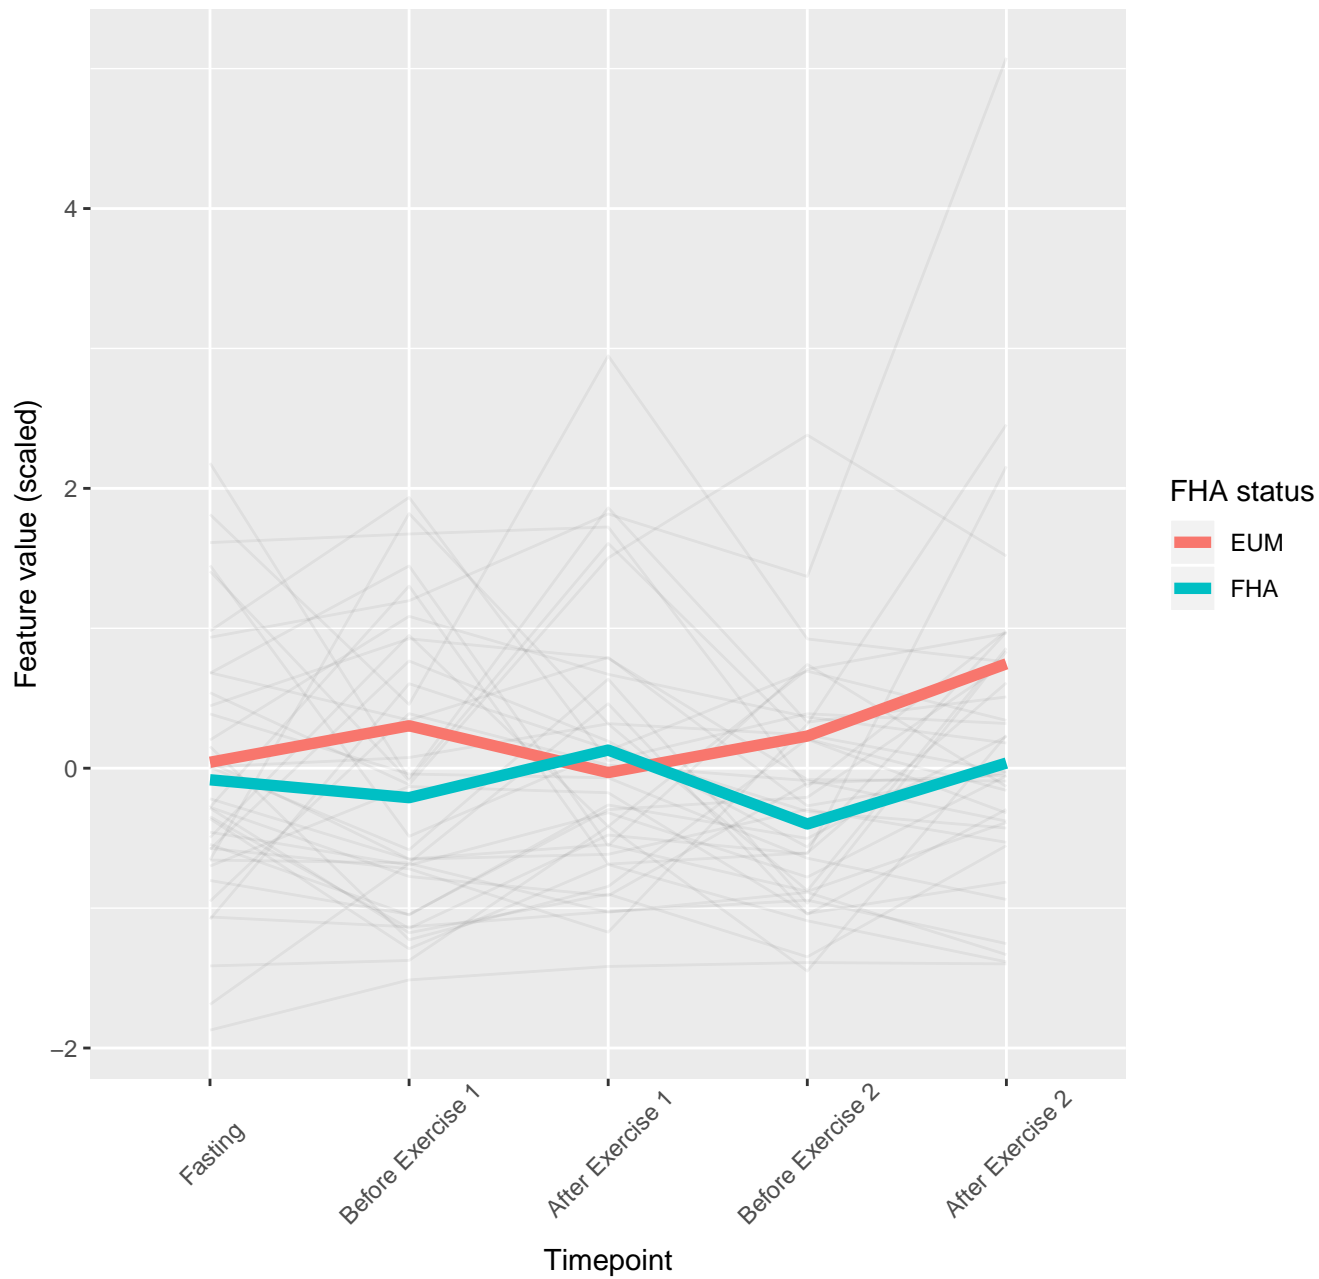

Line plot of PC(O-20:0/22:4)

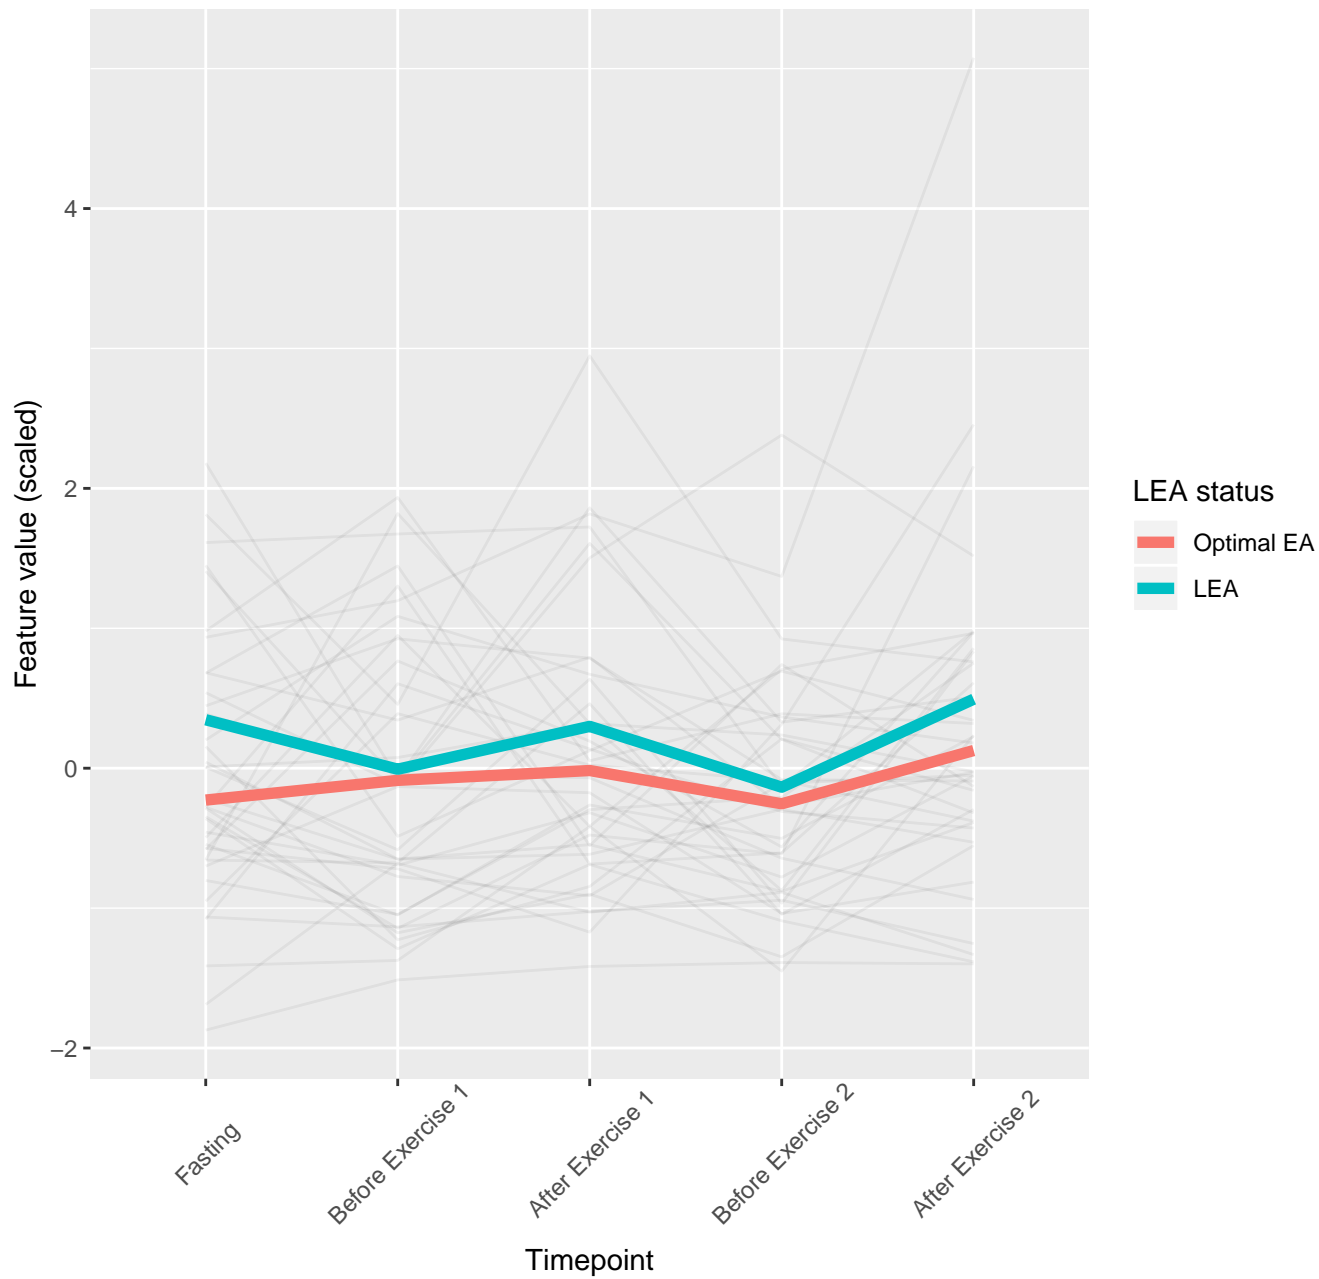

Line plot of PC(O-20:0/22:6)

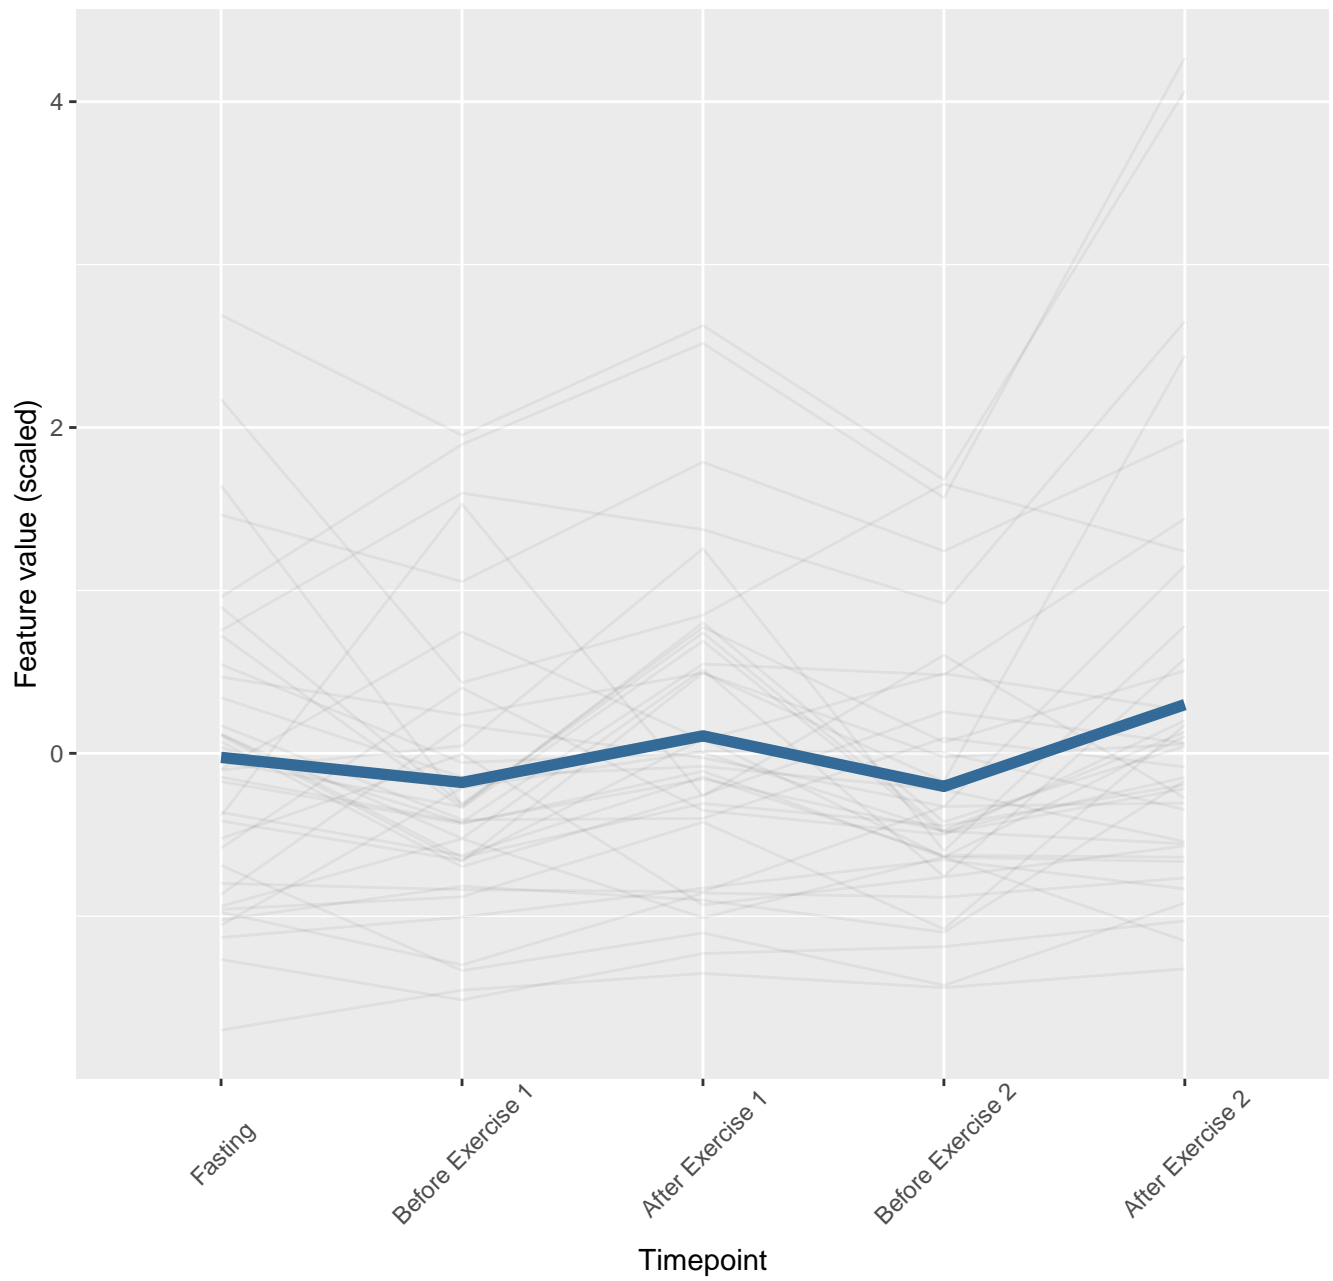

Line plot of PC(O-20:0/22:6)

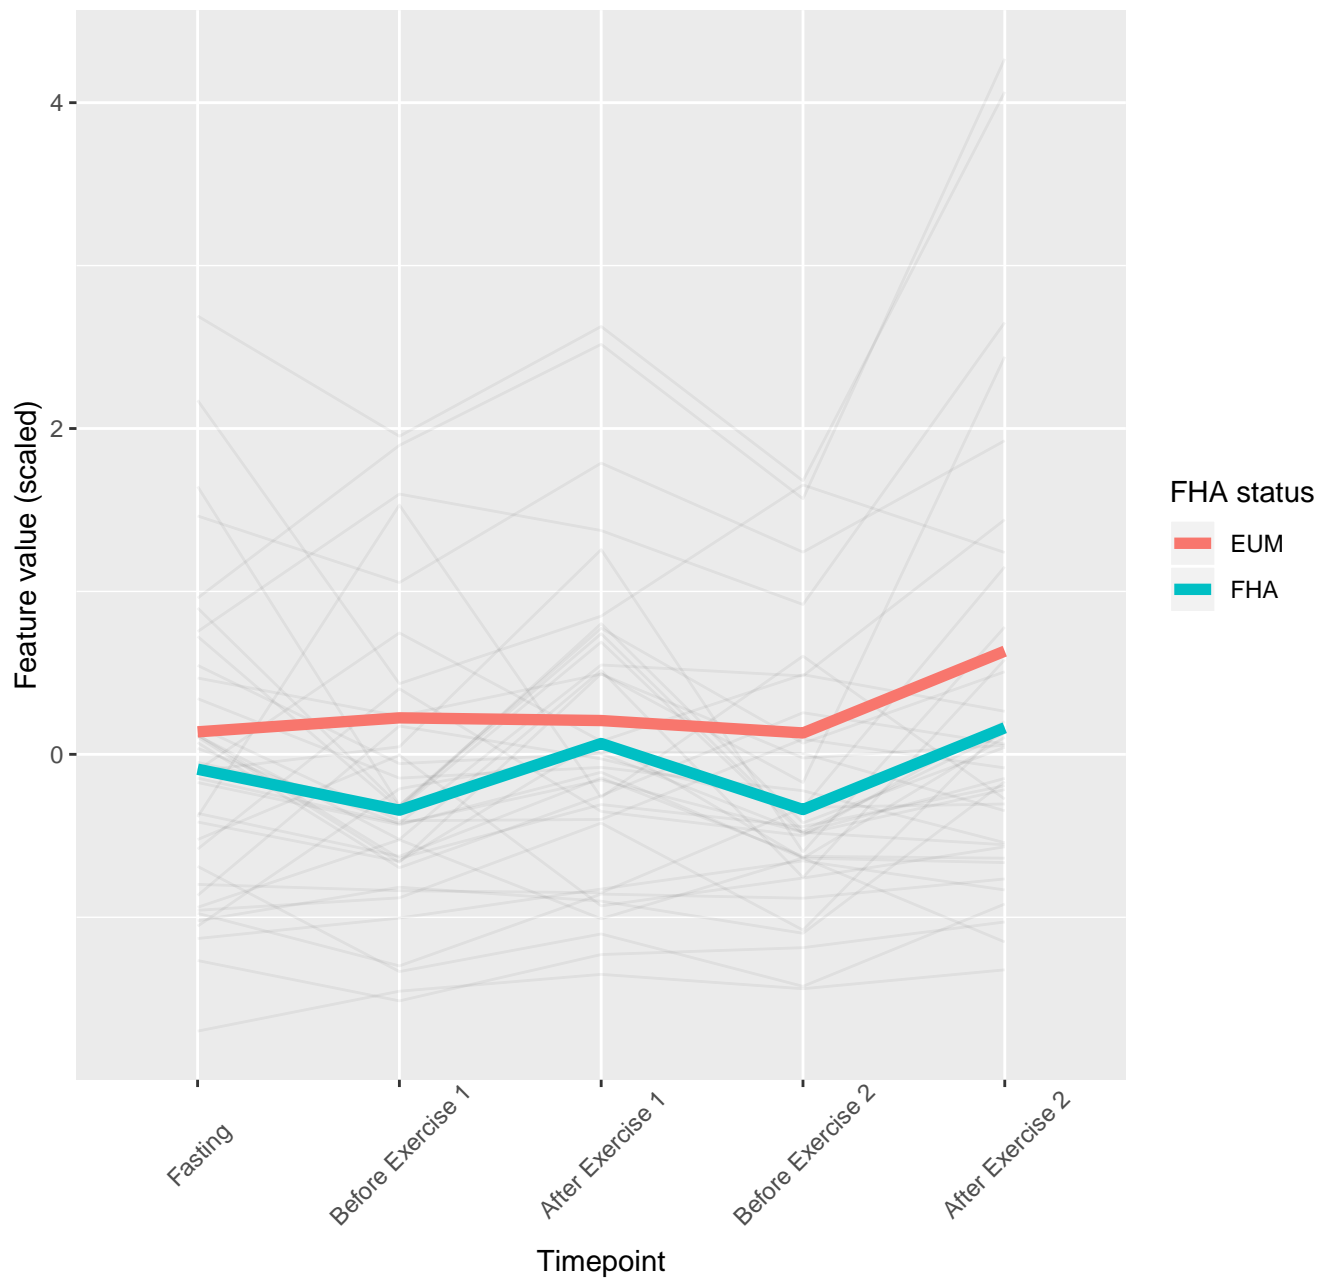

Line plot of PC(O-20:0/22:6)

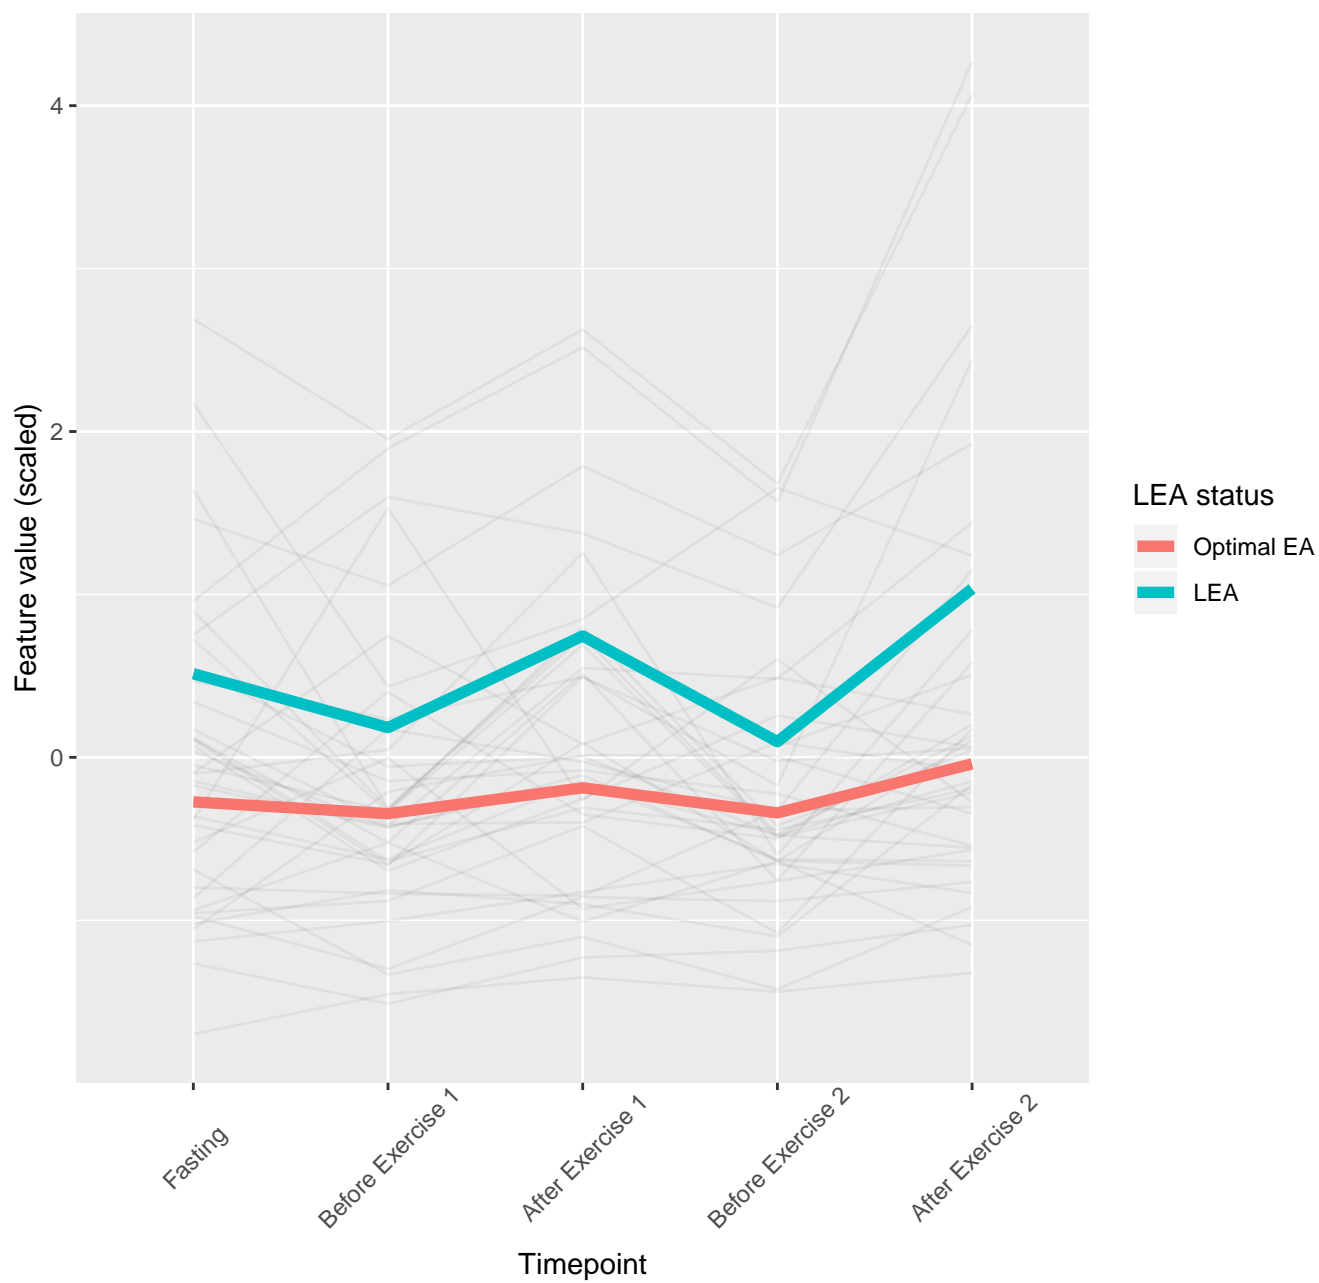

Line plot of PC(O-22:2/22:3)

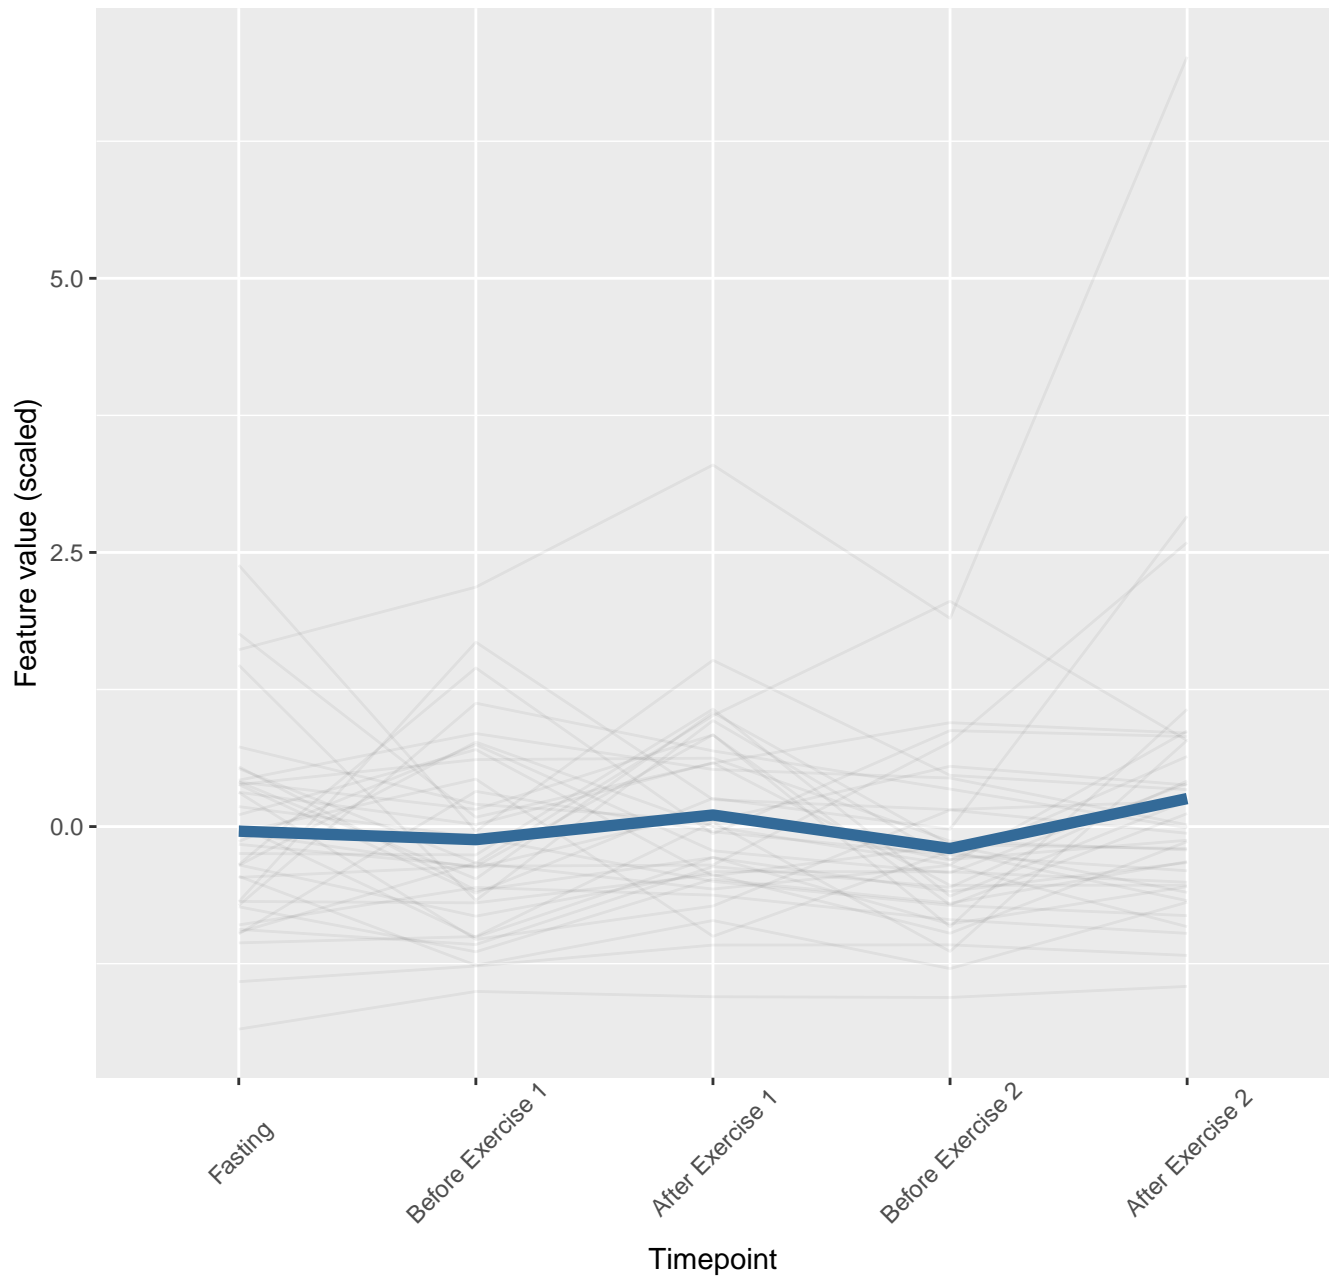



Line plot of PC(O-22:2/22:3)

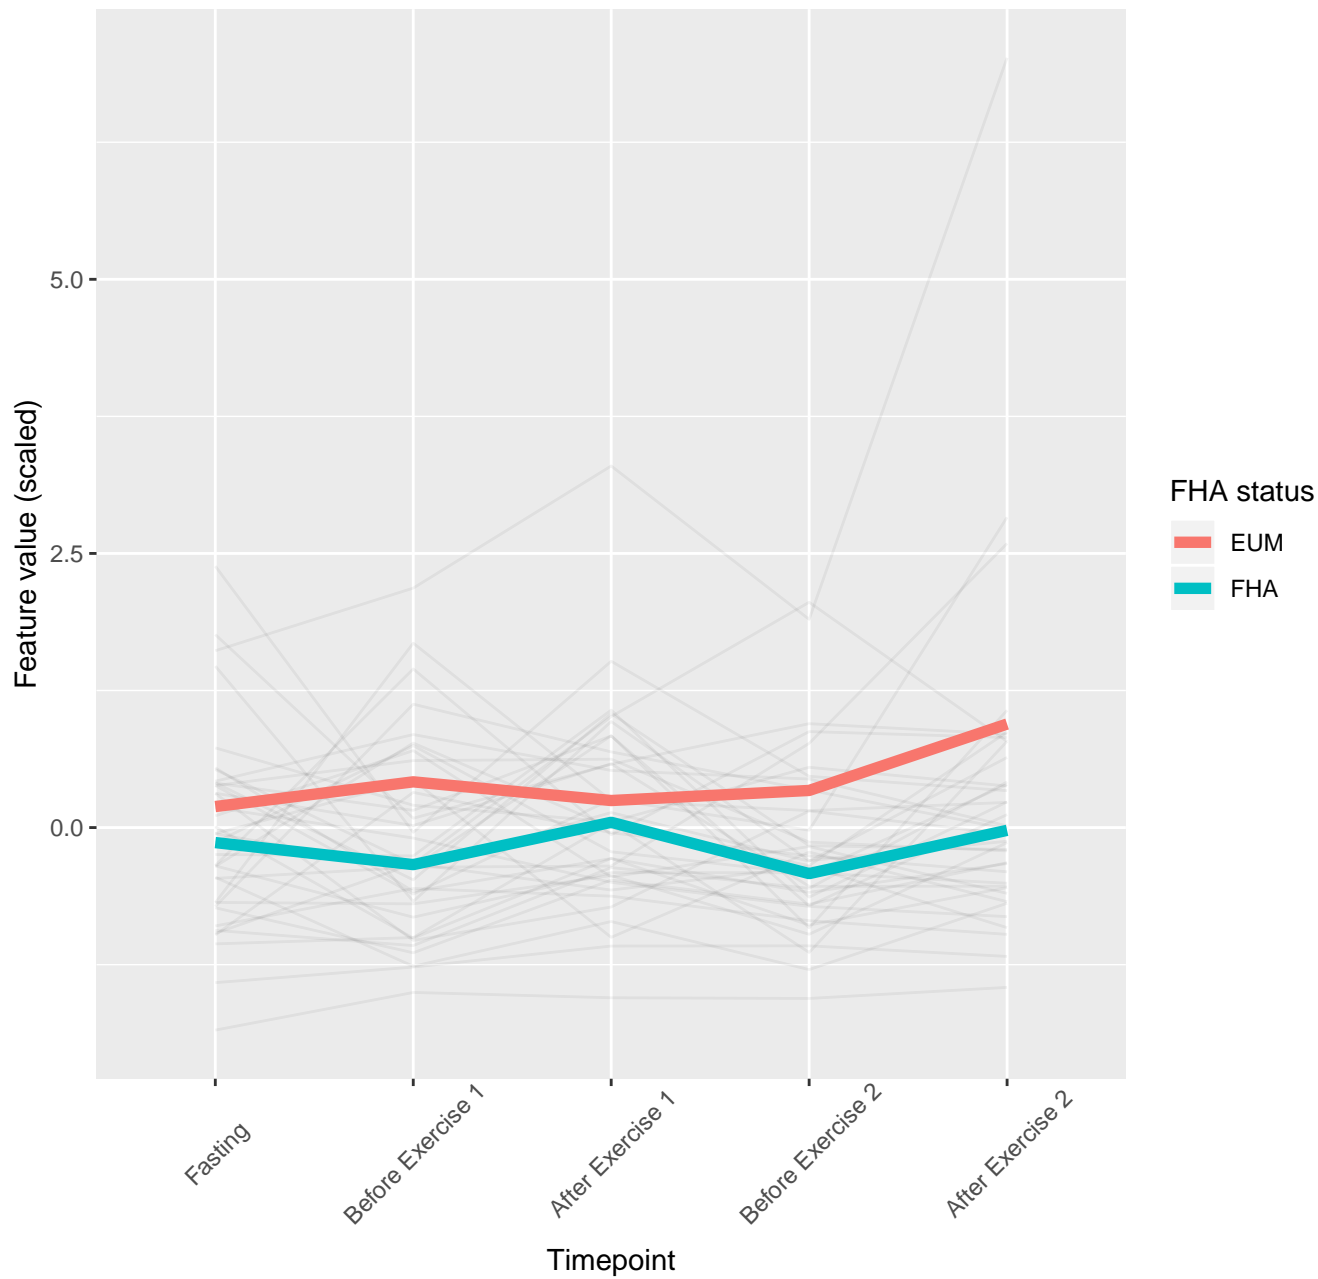

Line plot of PC(O-22:2/22:3)

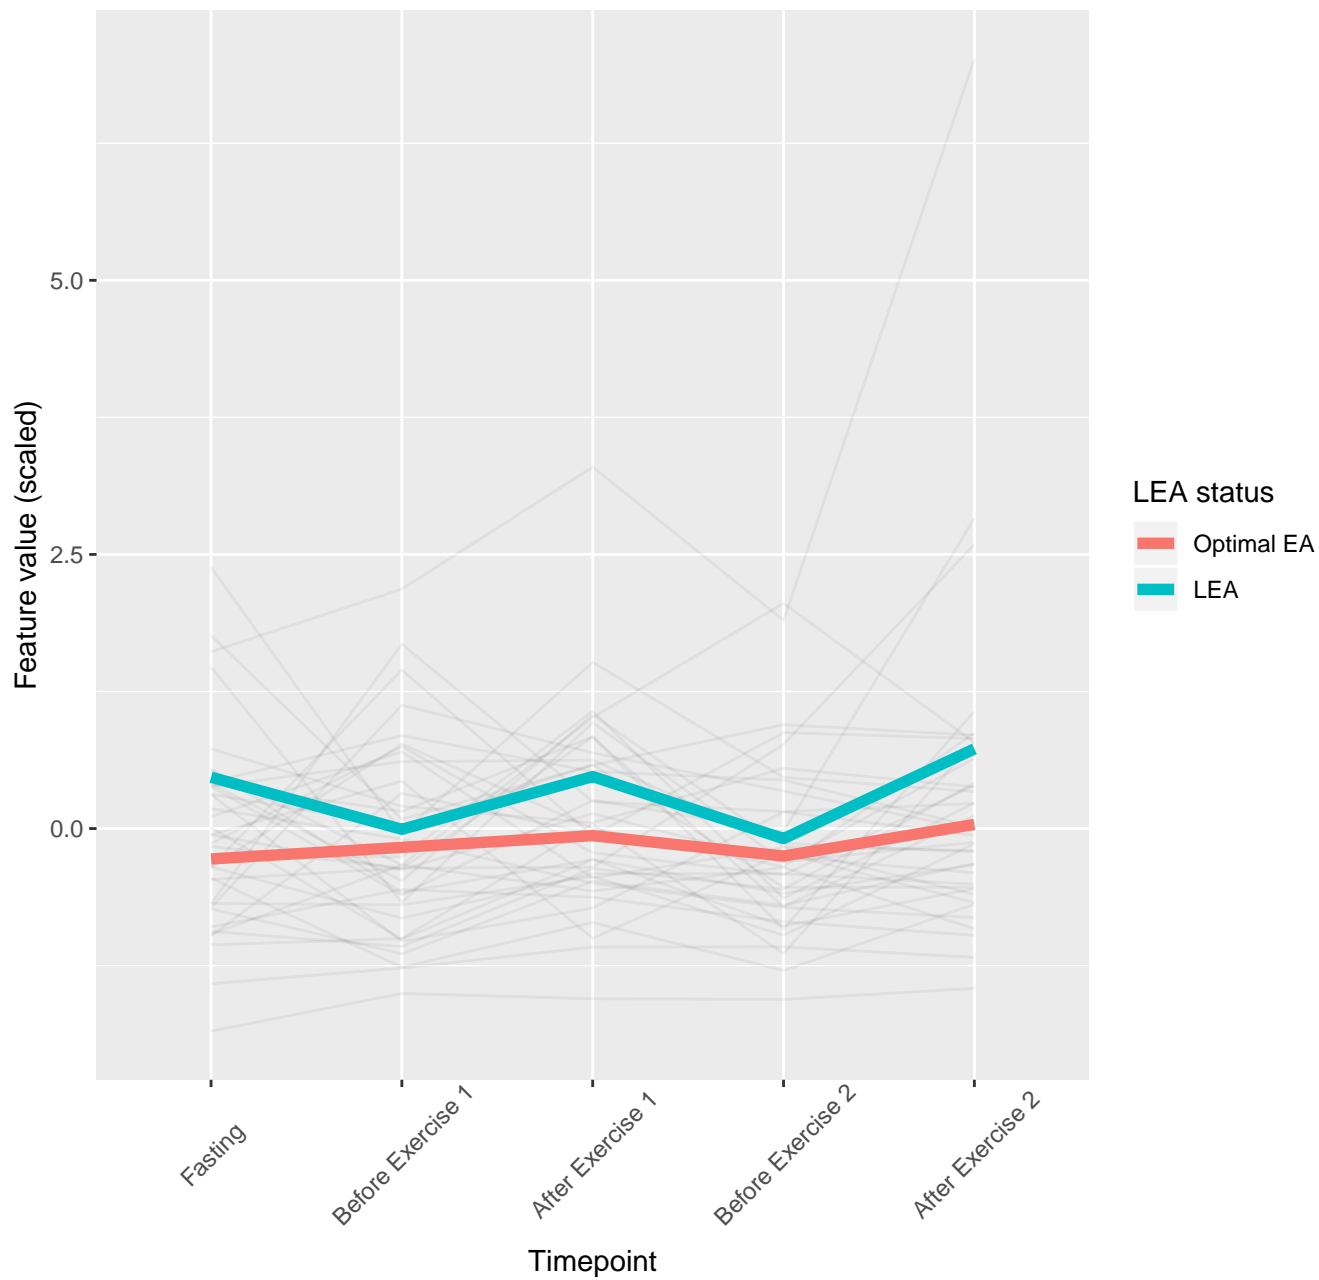

Line plot of PC(O-32:0)

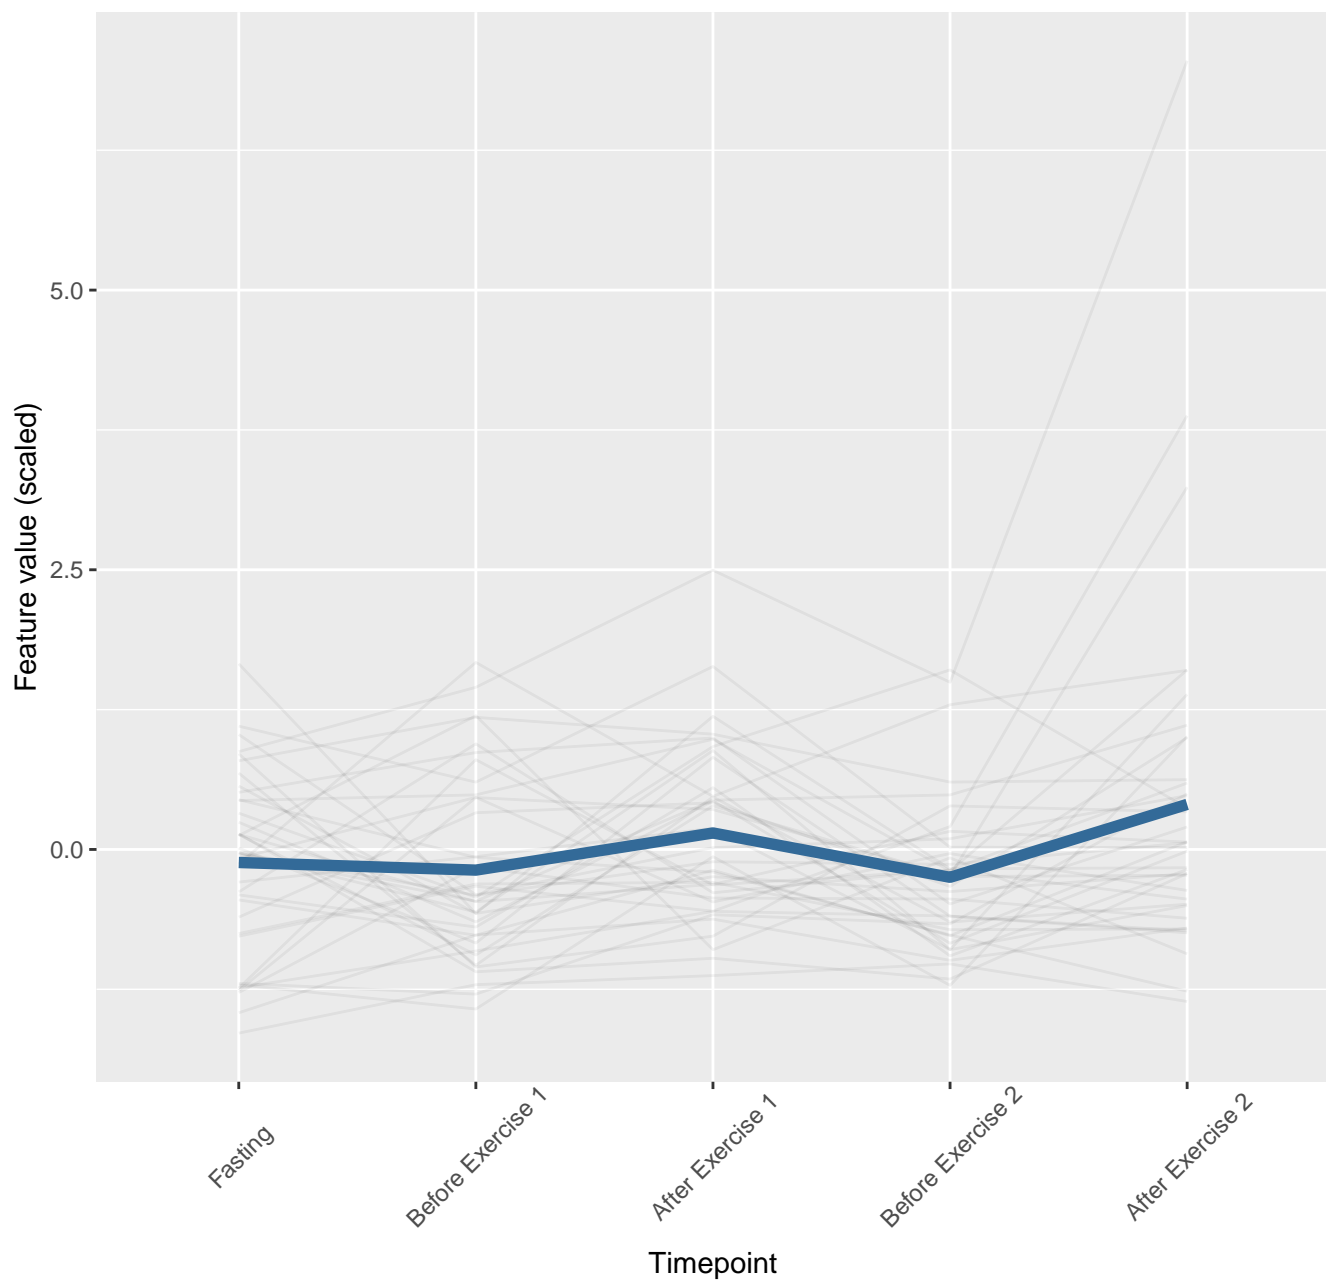

Line plot of PC(O-32:0)

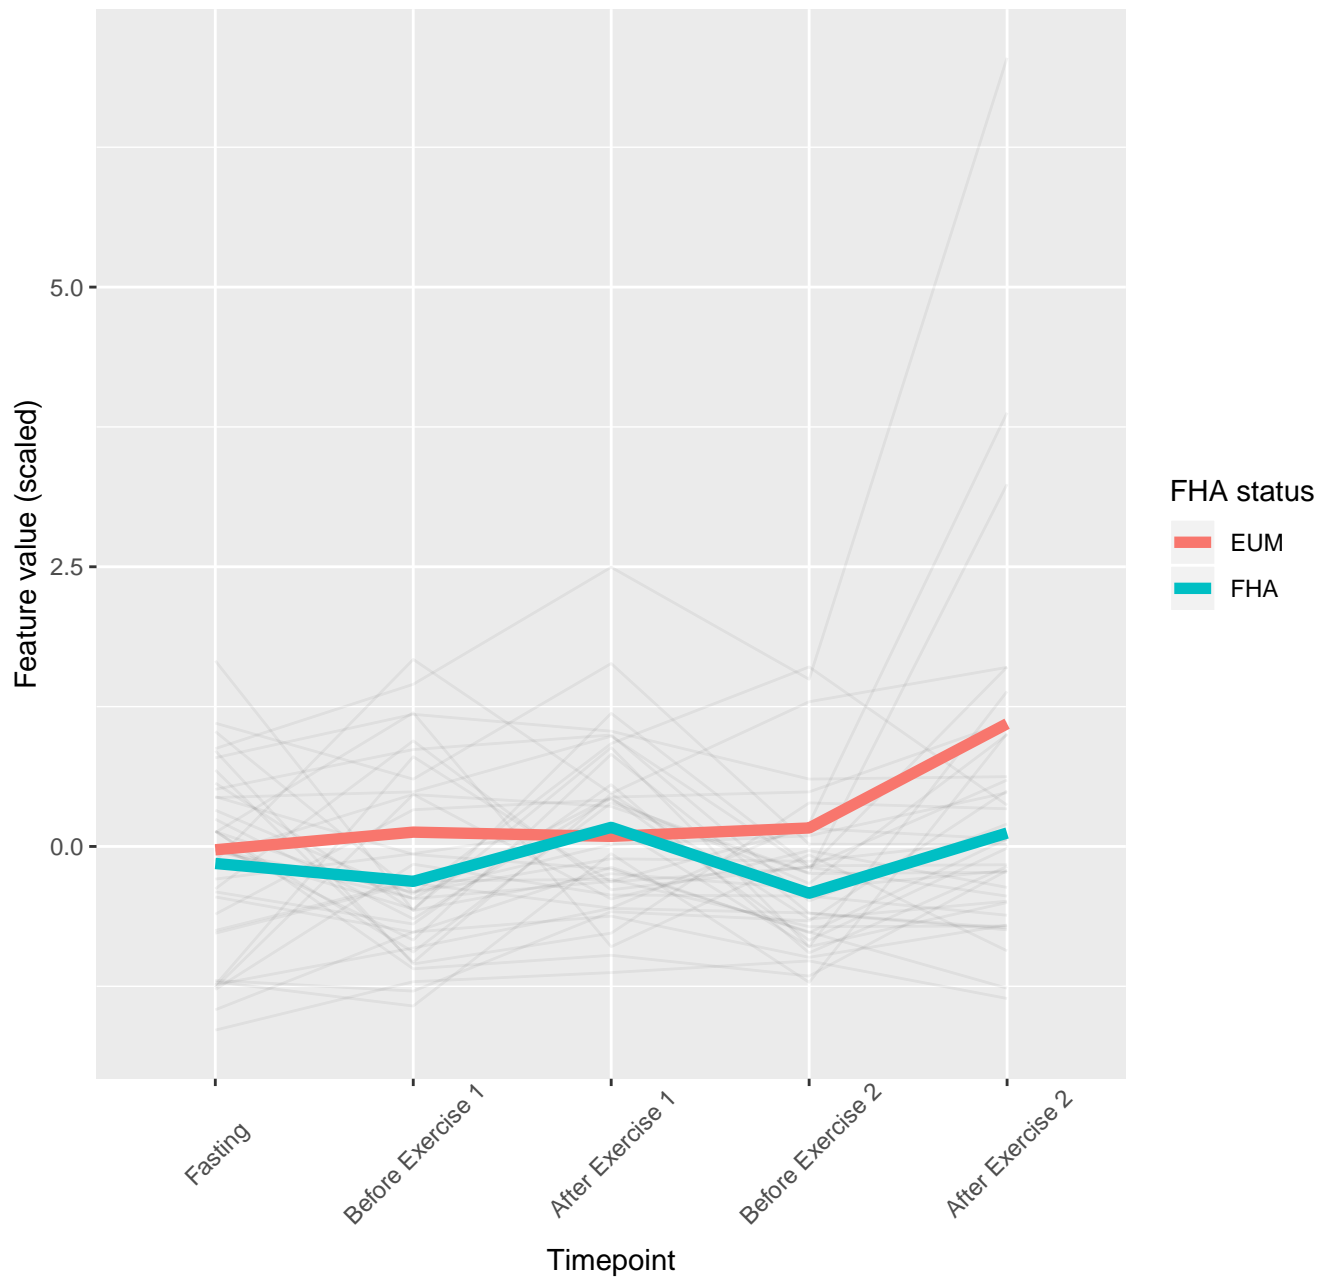

Line plot of PC(O-32:0)

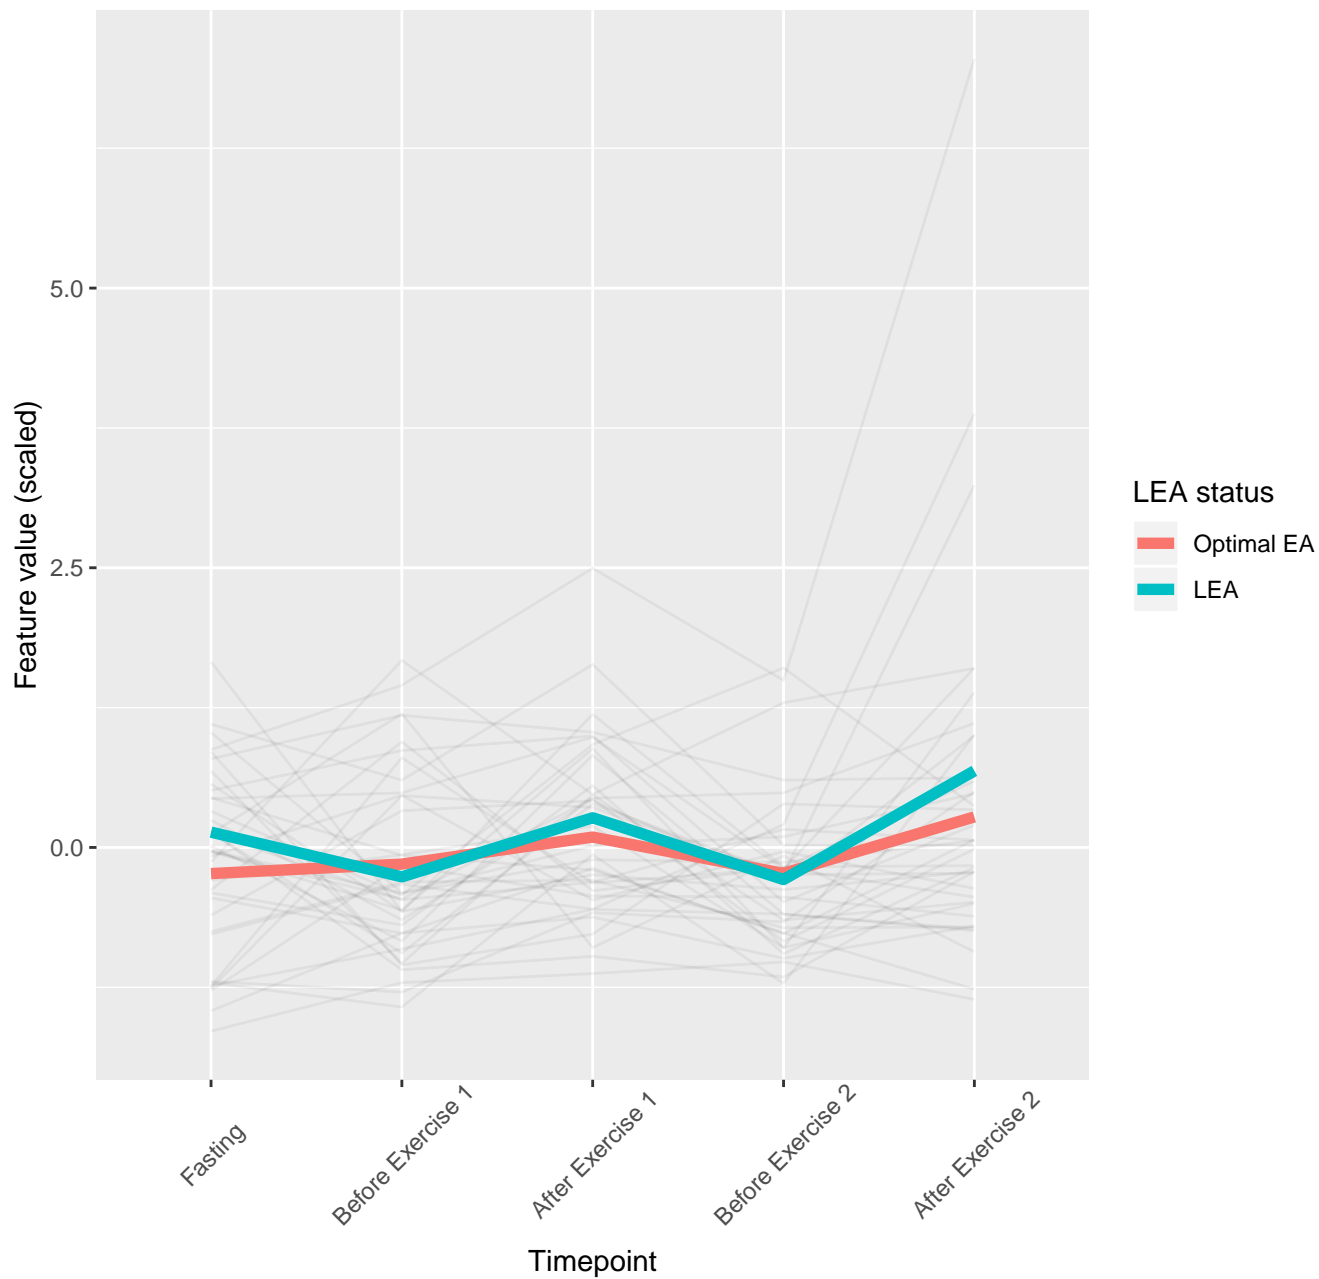

Line plot of PC(O-32:1)

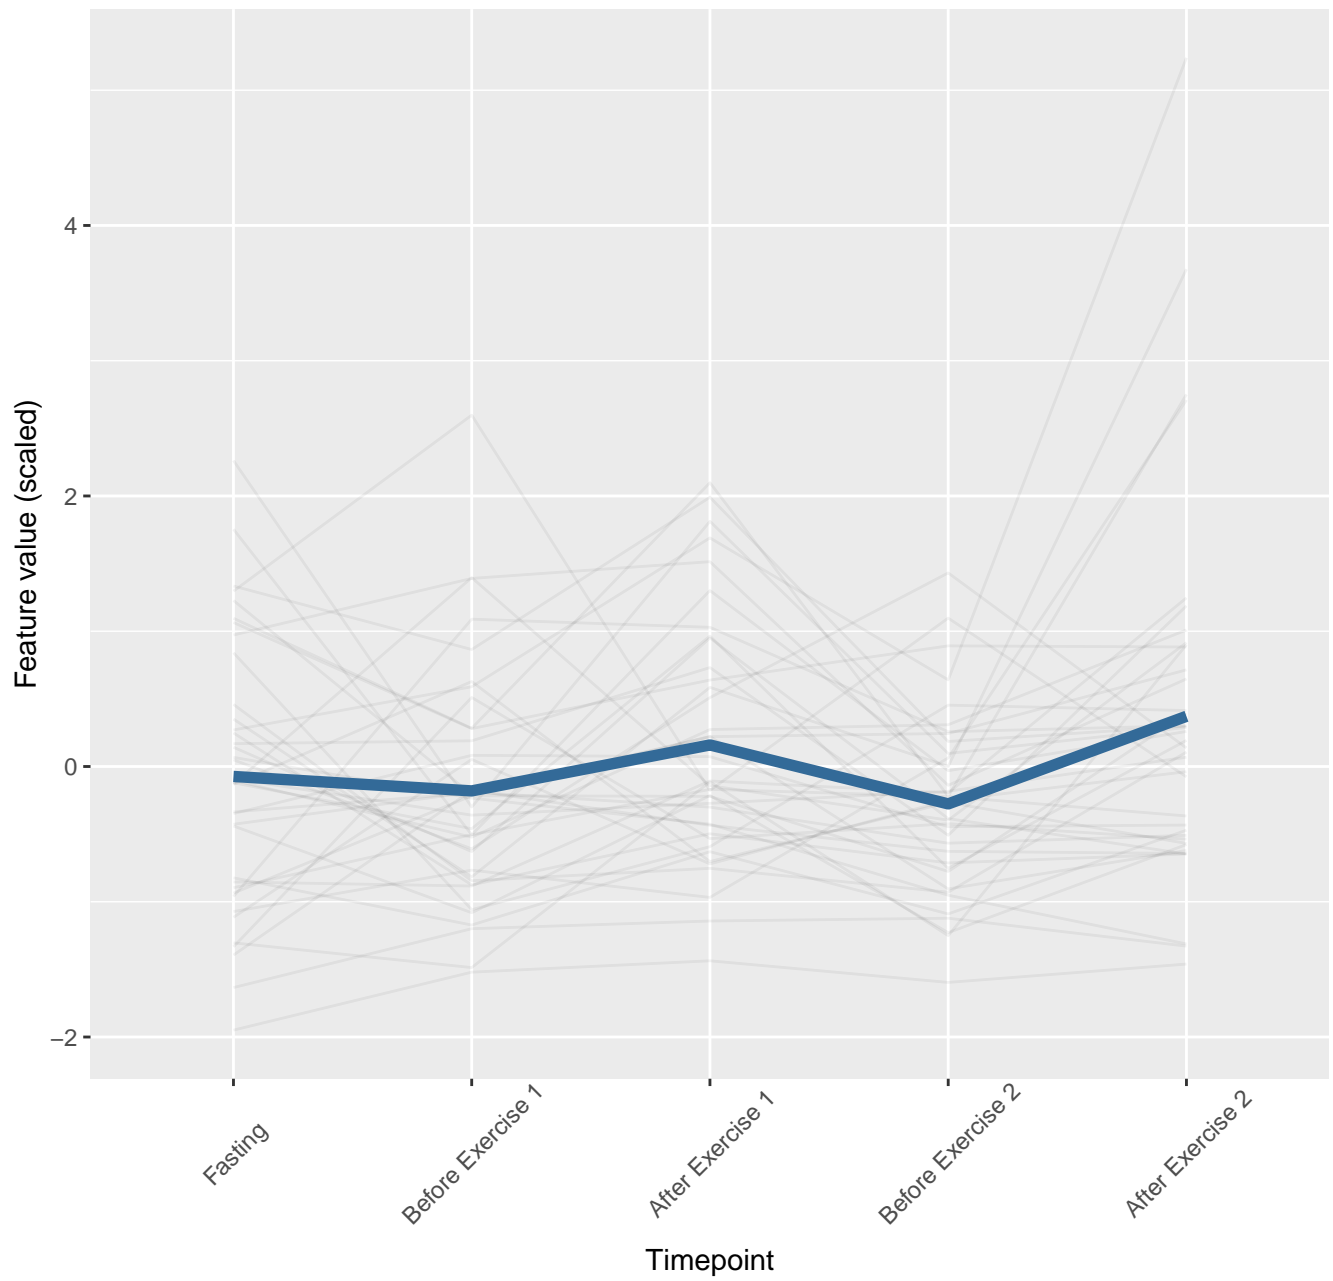

Line plot of PC(O-32:1)

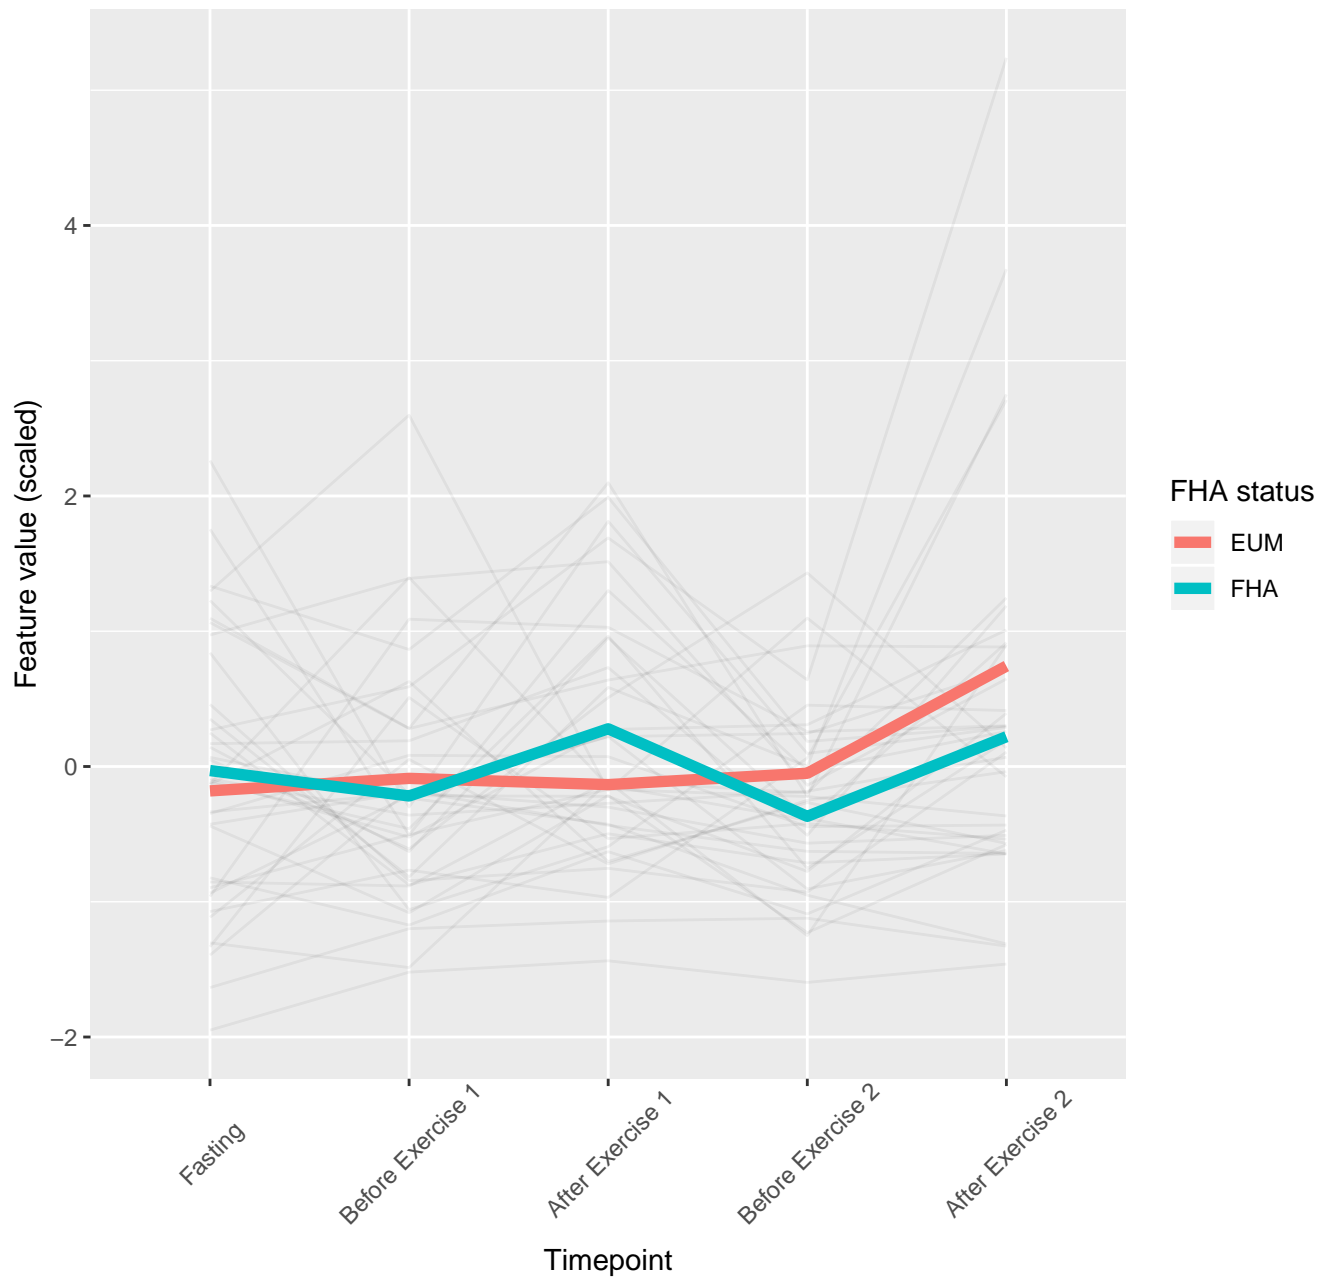

Line plot of PC(O-32:1)

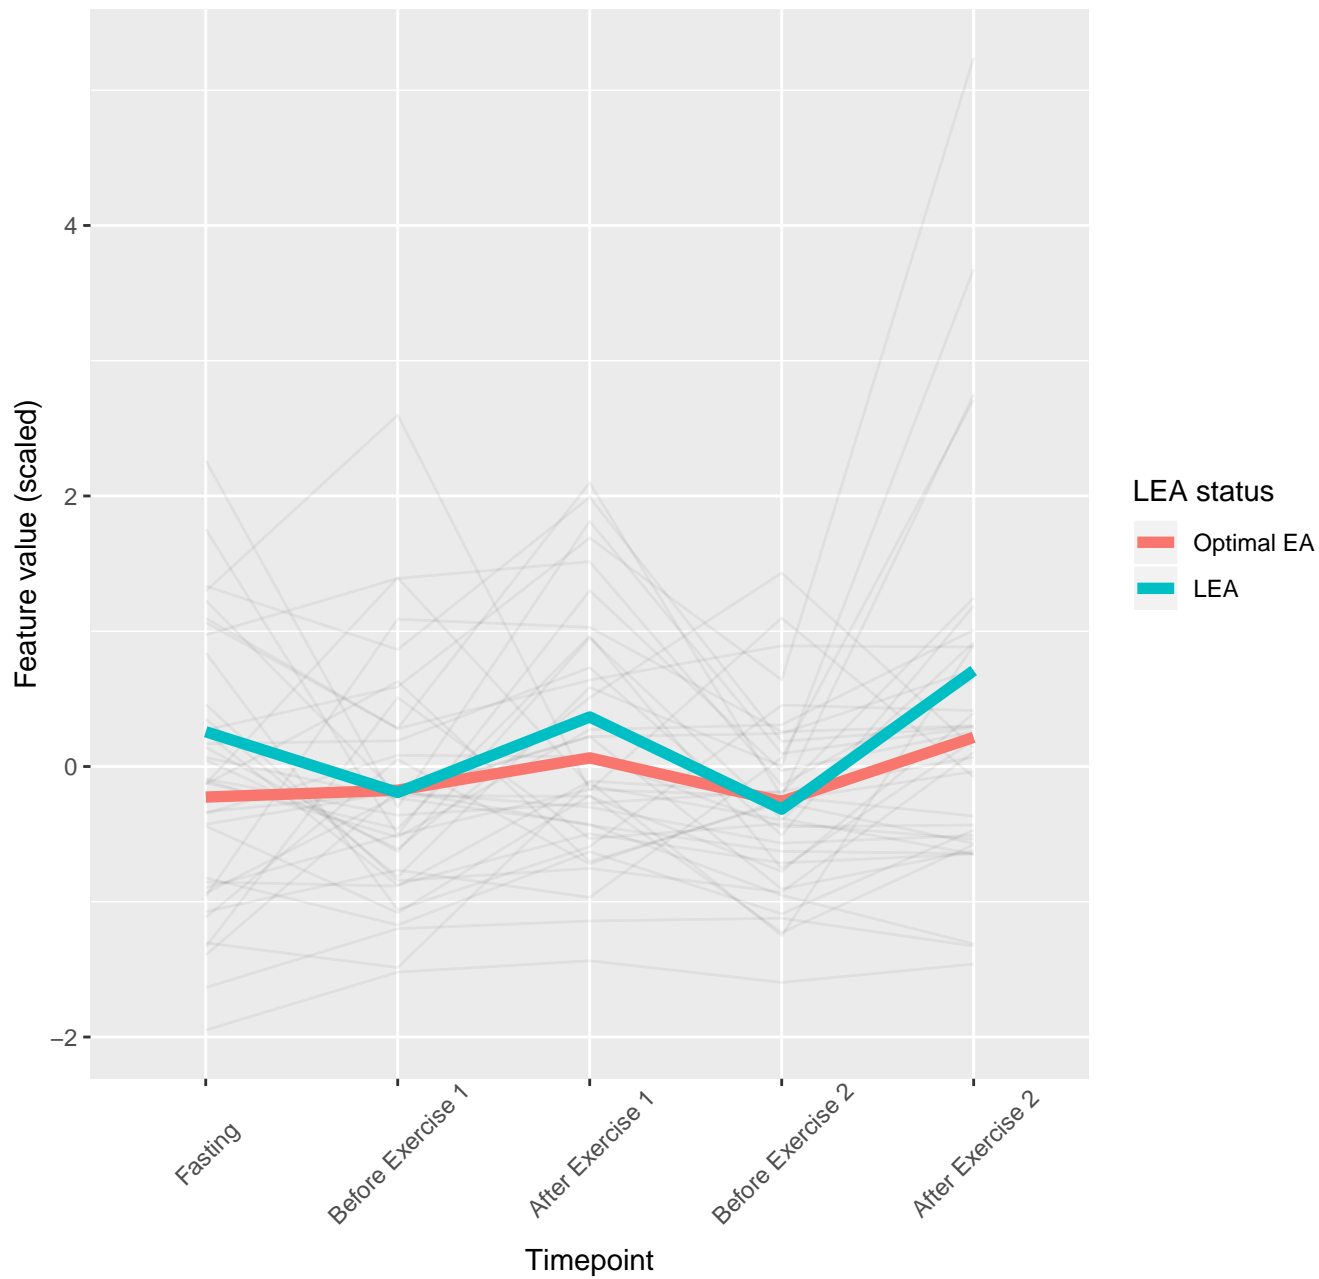



Line plot of PC(O-34:2)

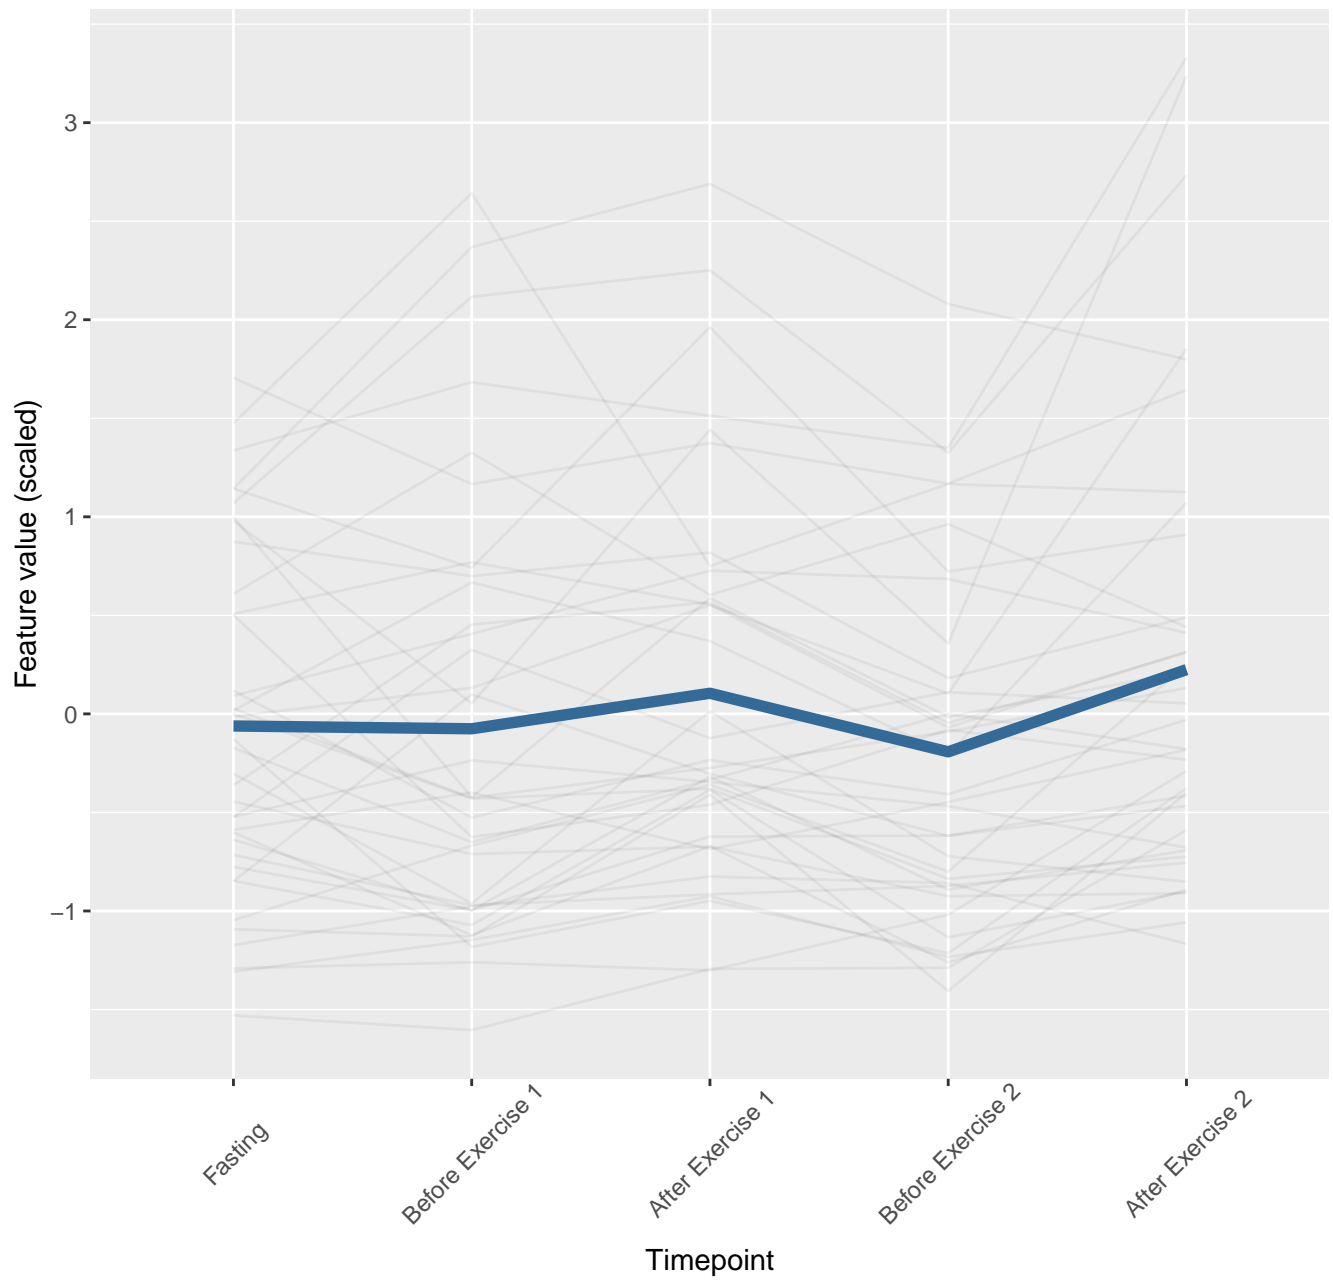

Line plot of PC(O-34:2)

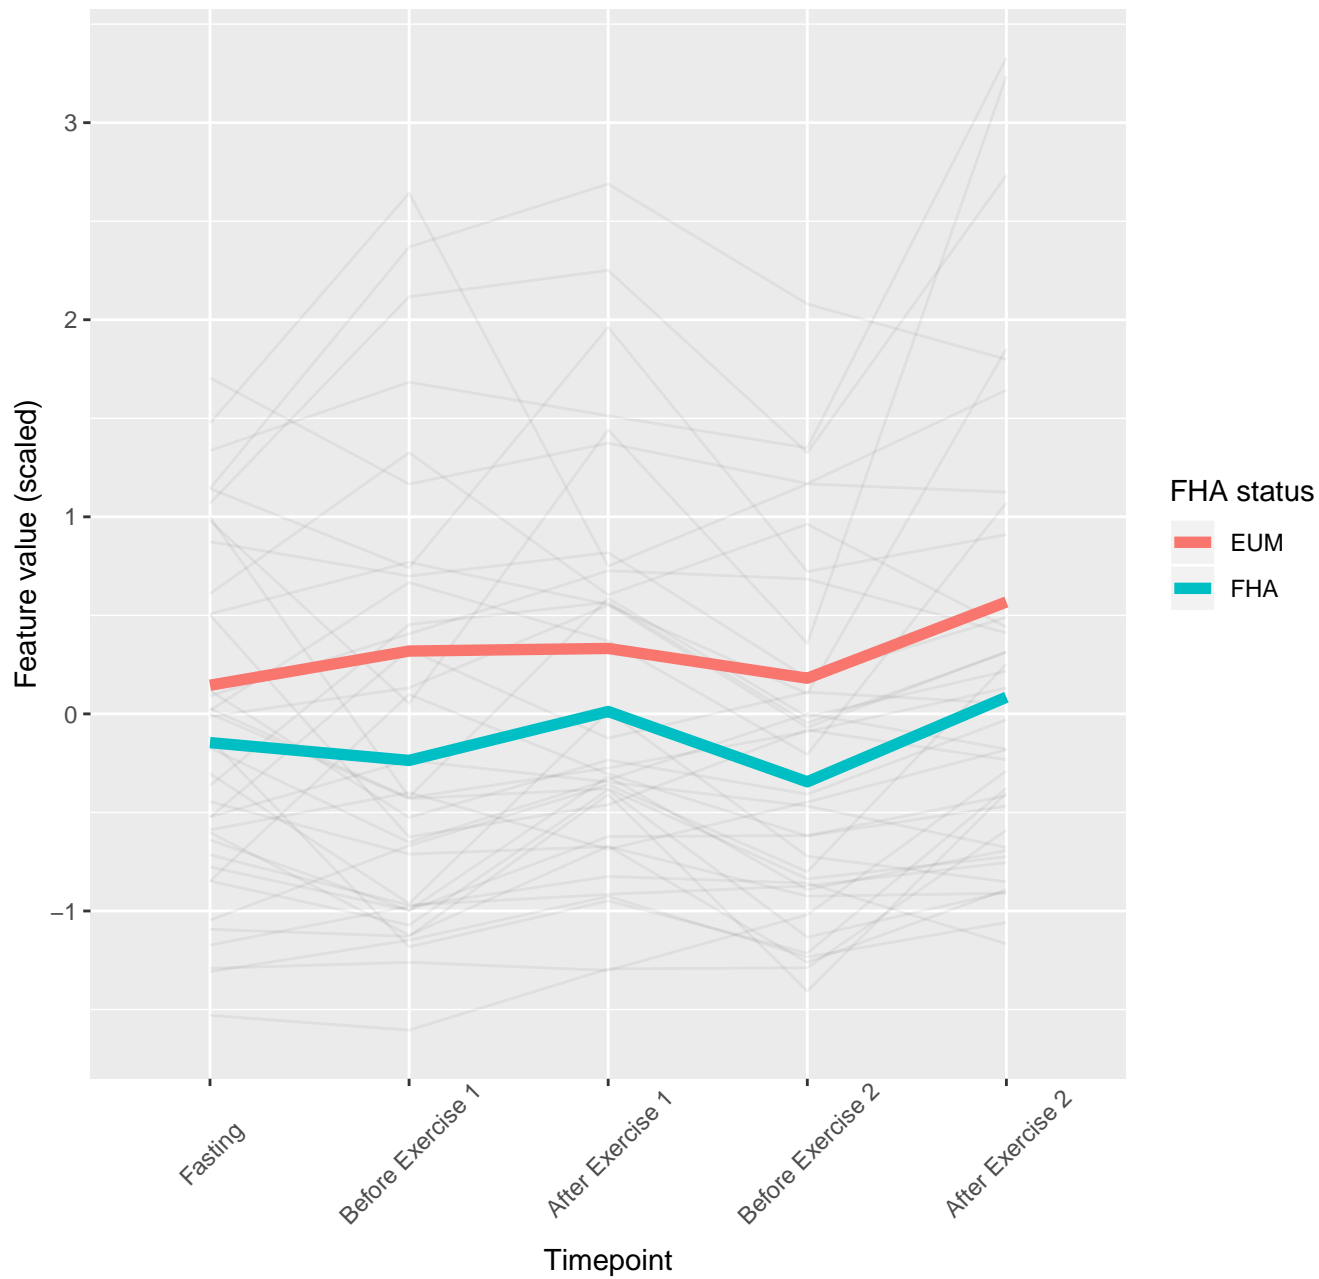

Line plot of PC(O-34:2)

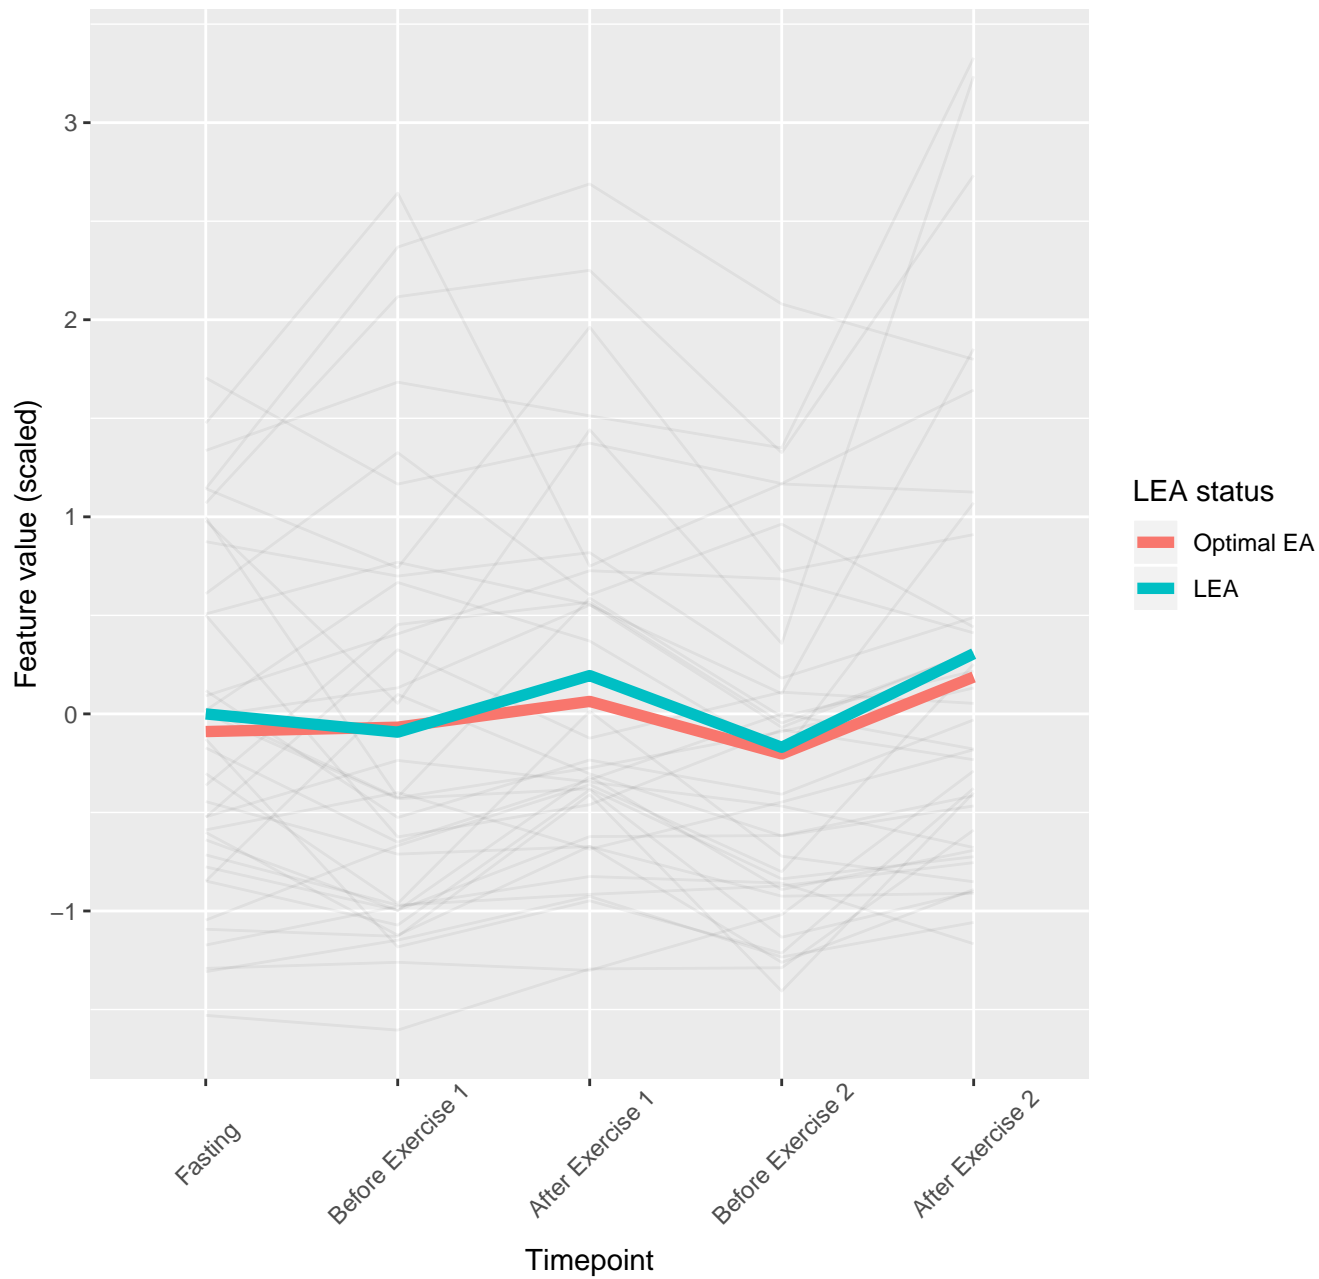

Line plot of PC(O-34:3)

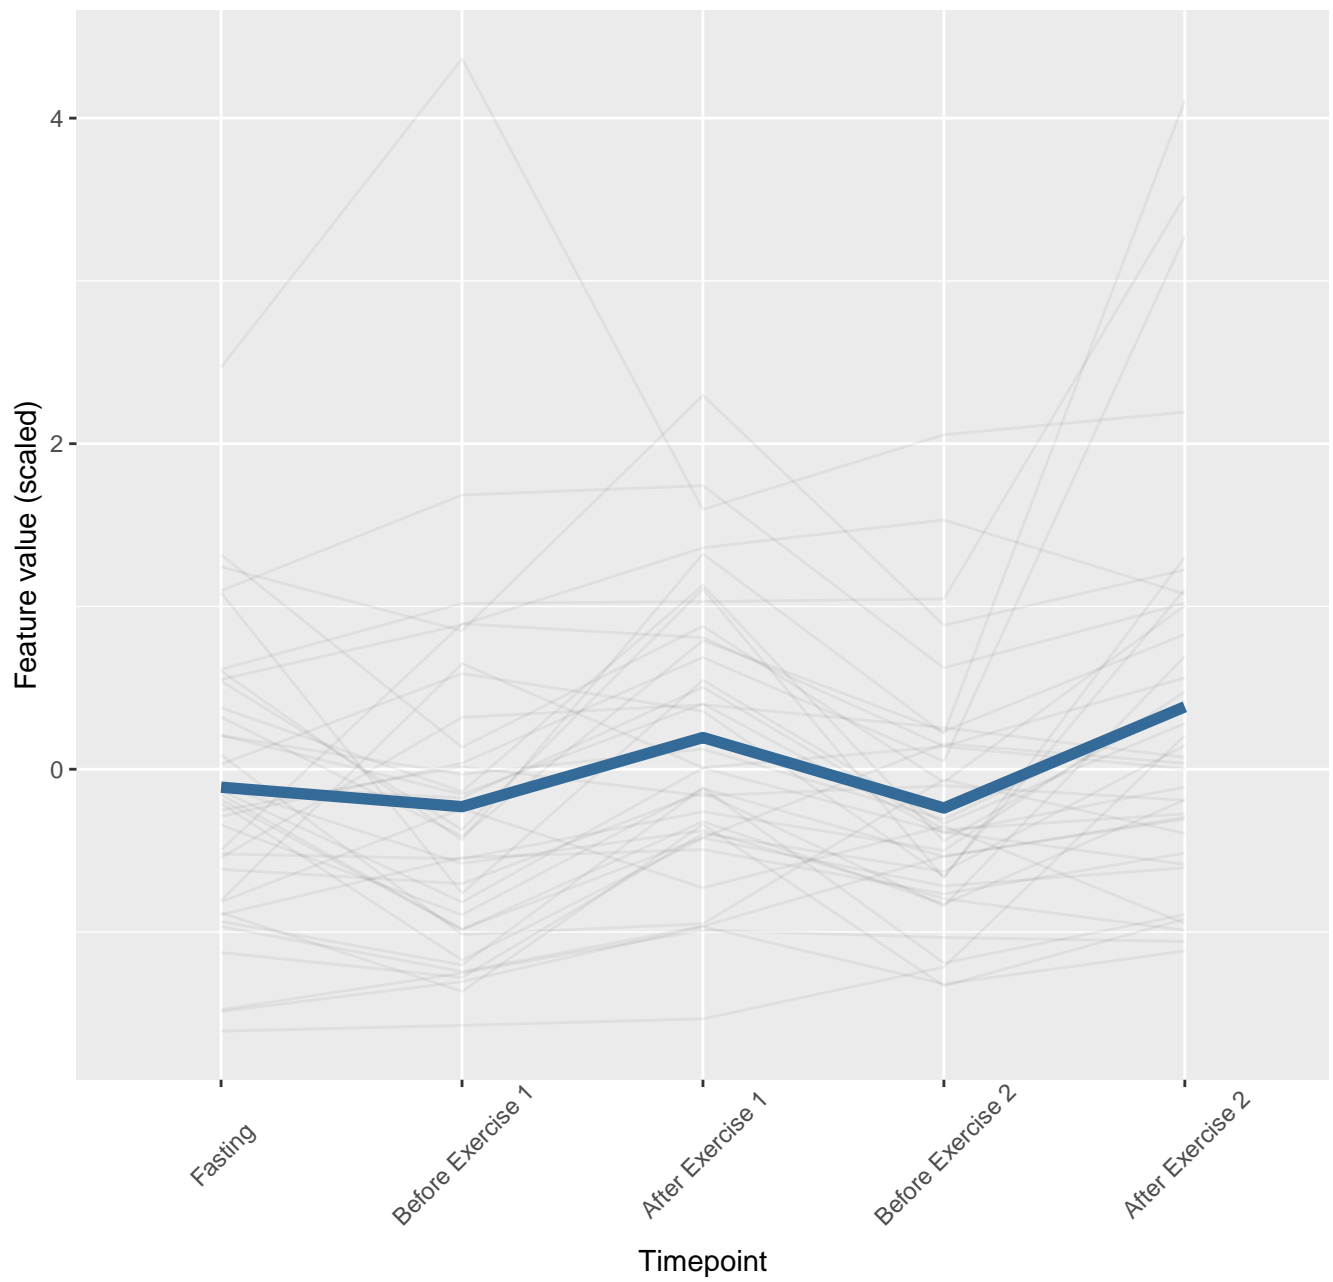

Line plot of PC(O-34:3)

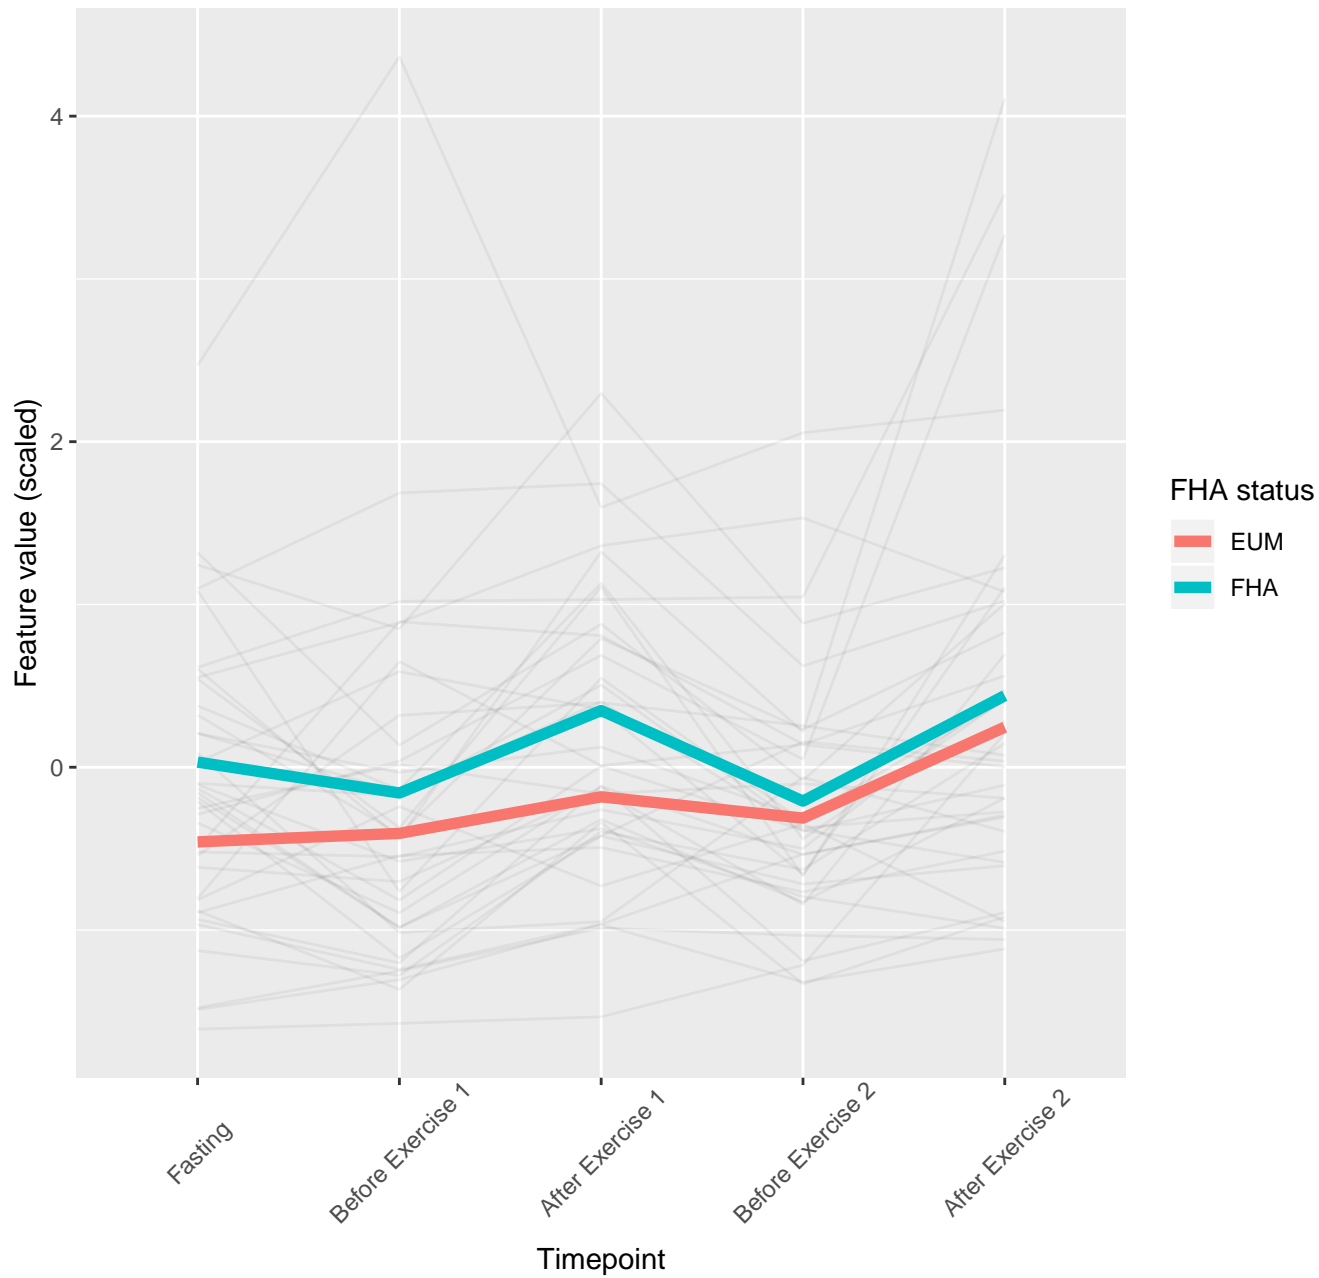

Line plot of PC(O-34:3)

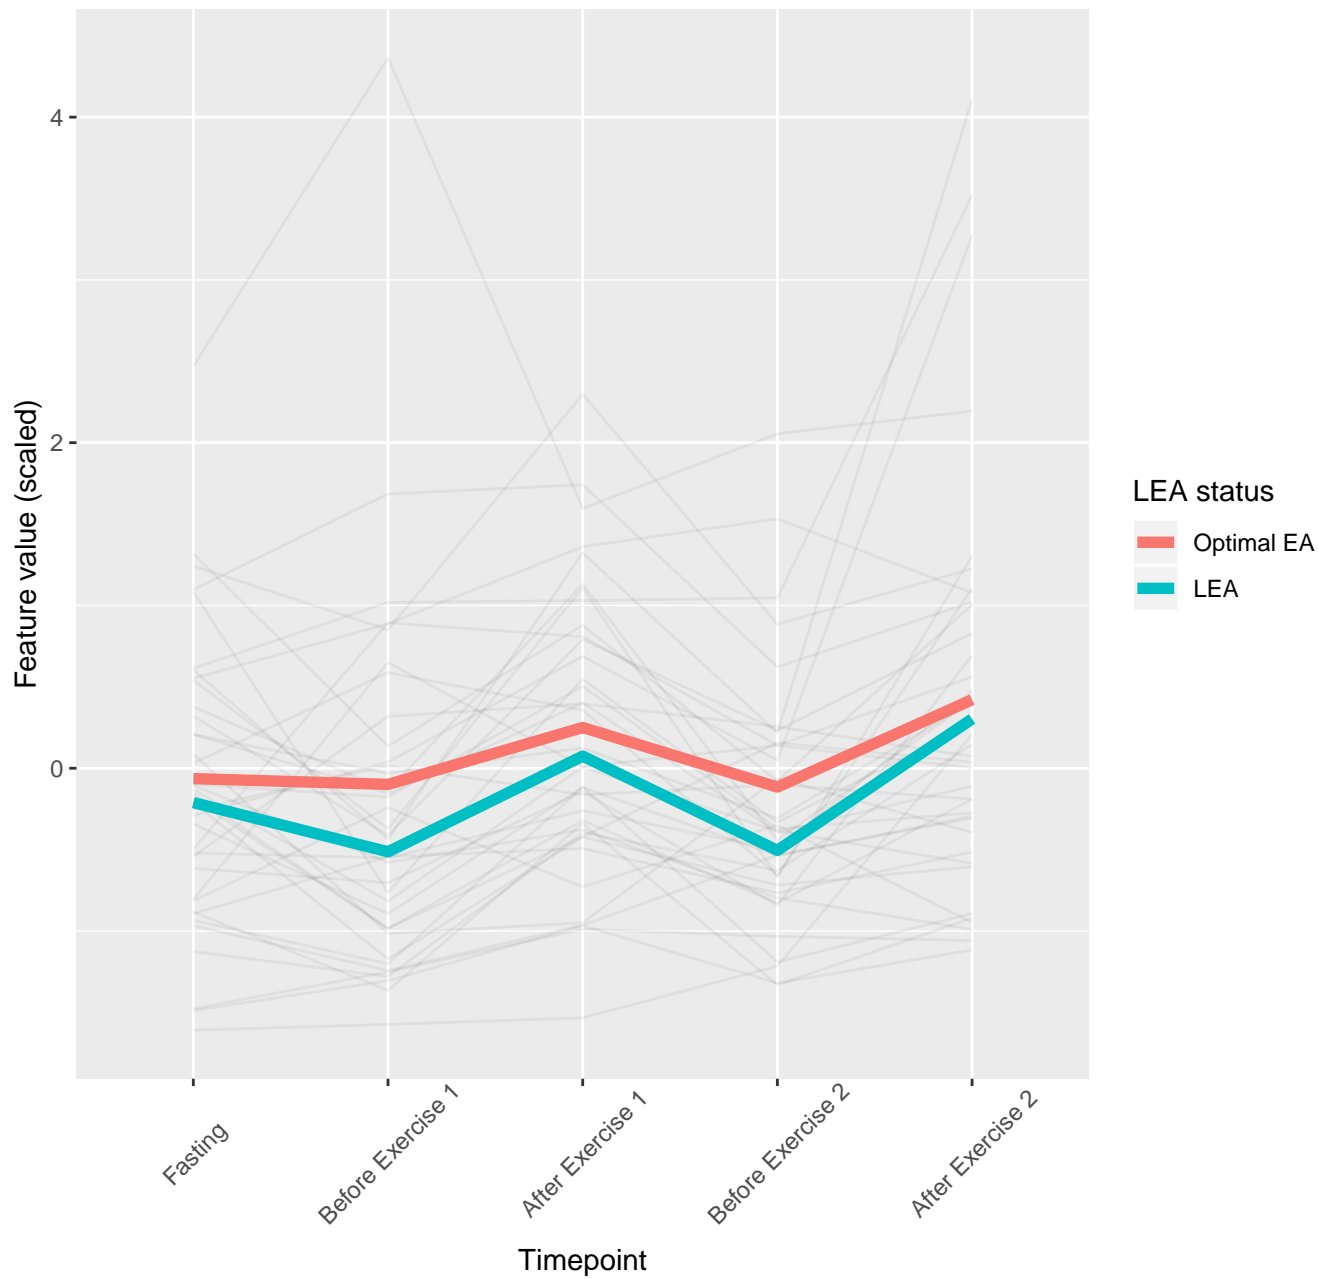

Line plot of PC(O-36:2)

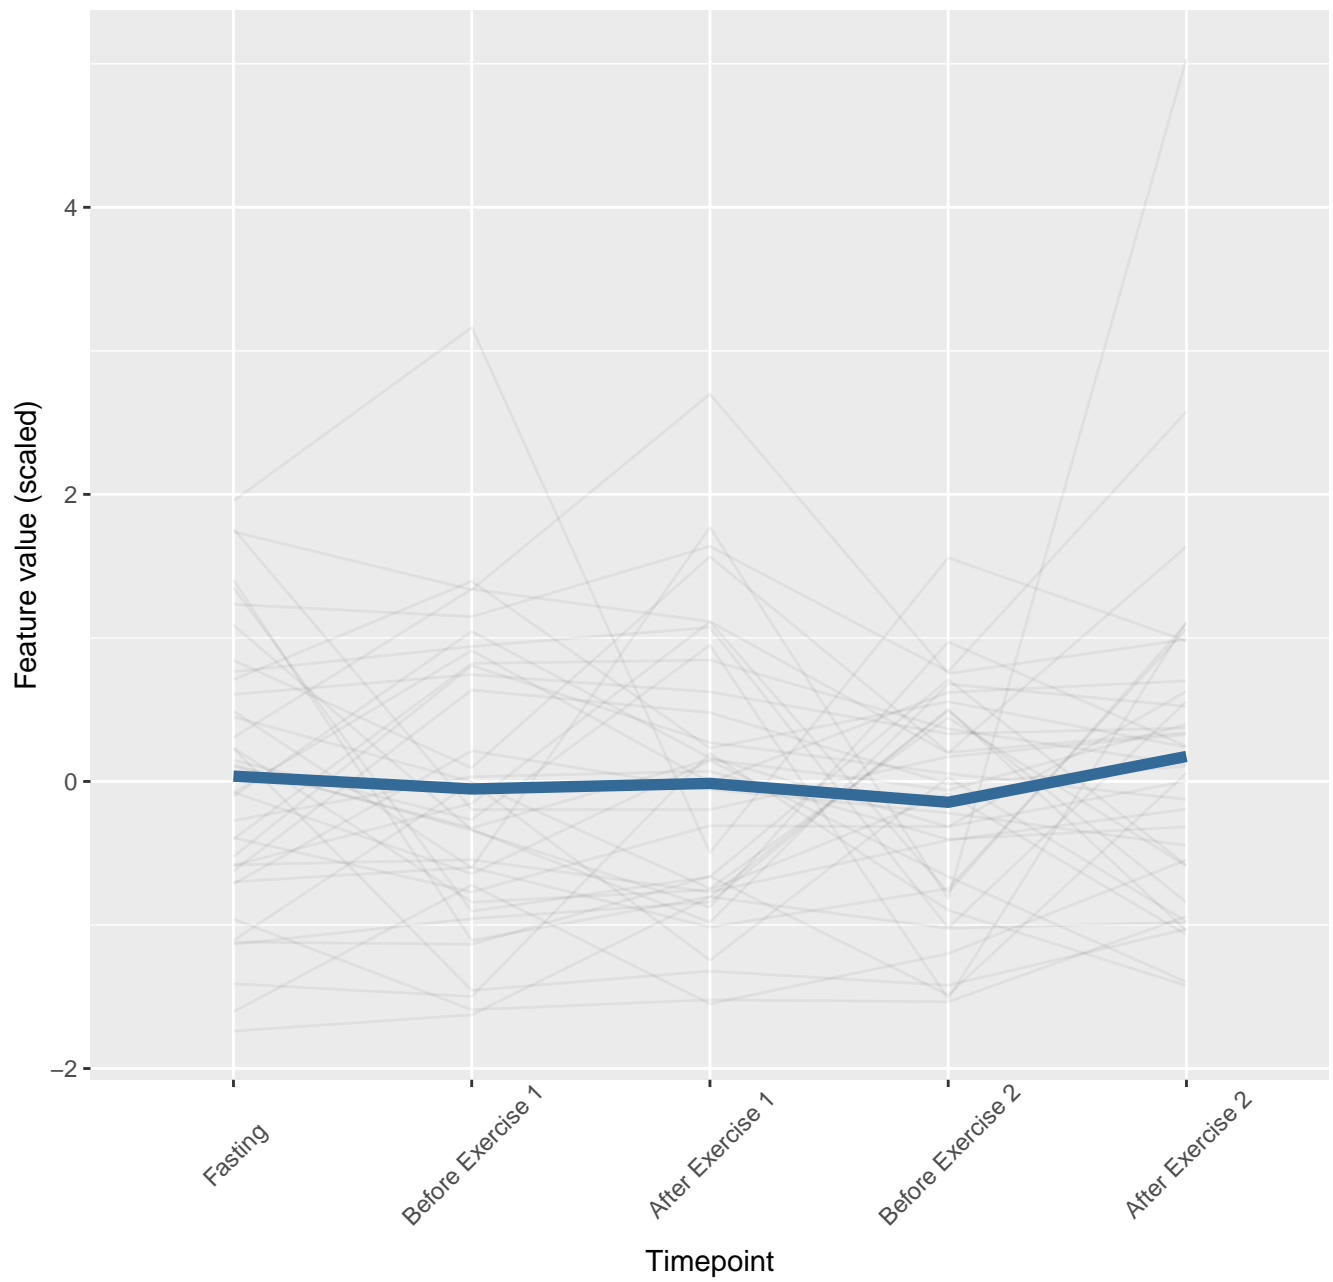

Line plot of PC(O-36:2)

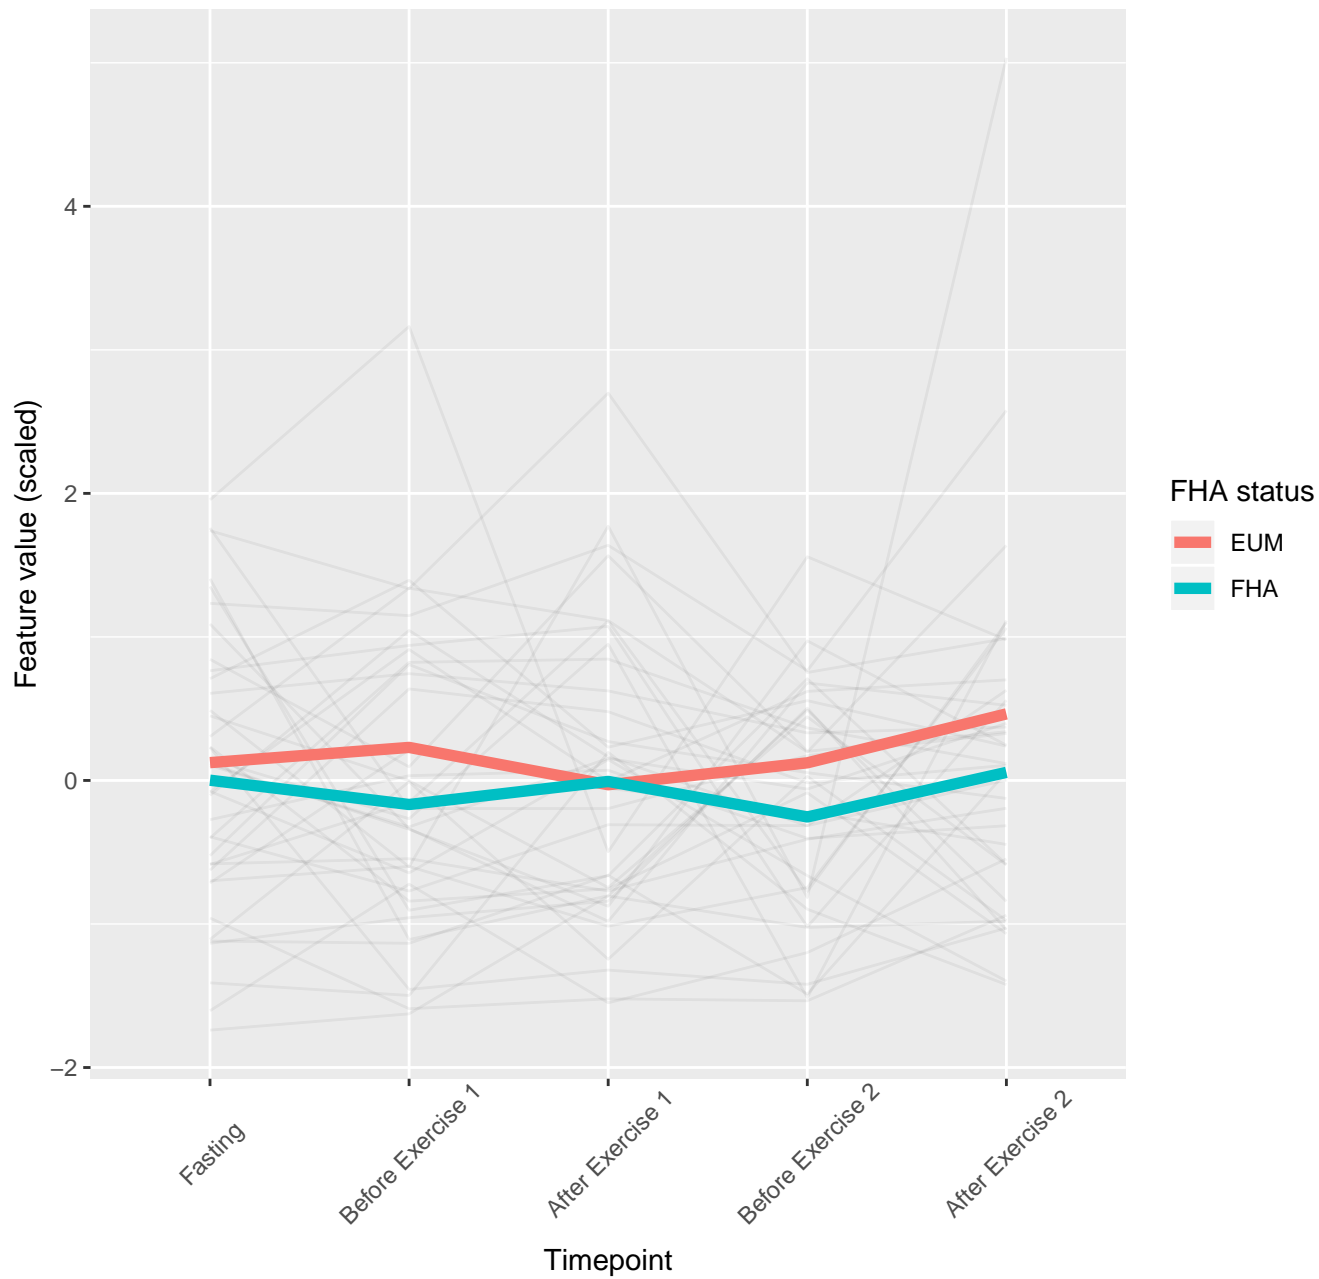



Line plot of PC(O-36:2)

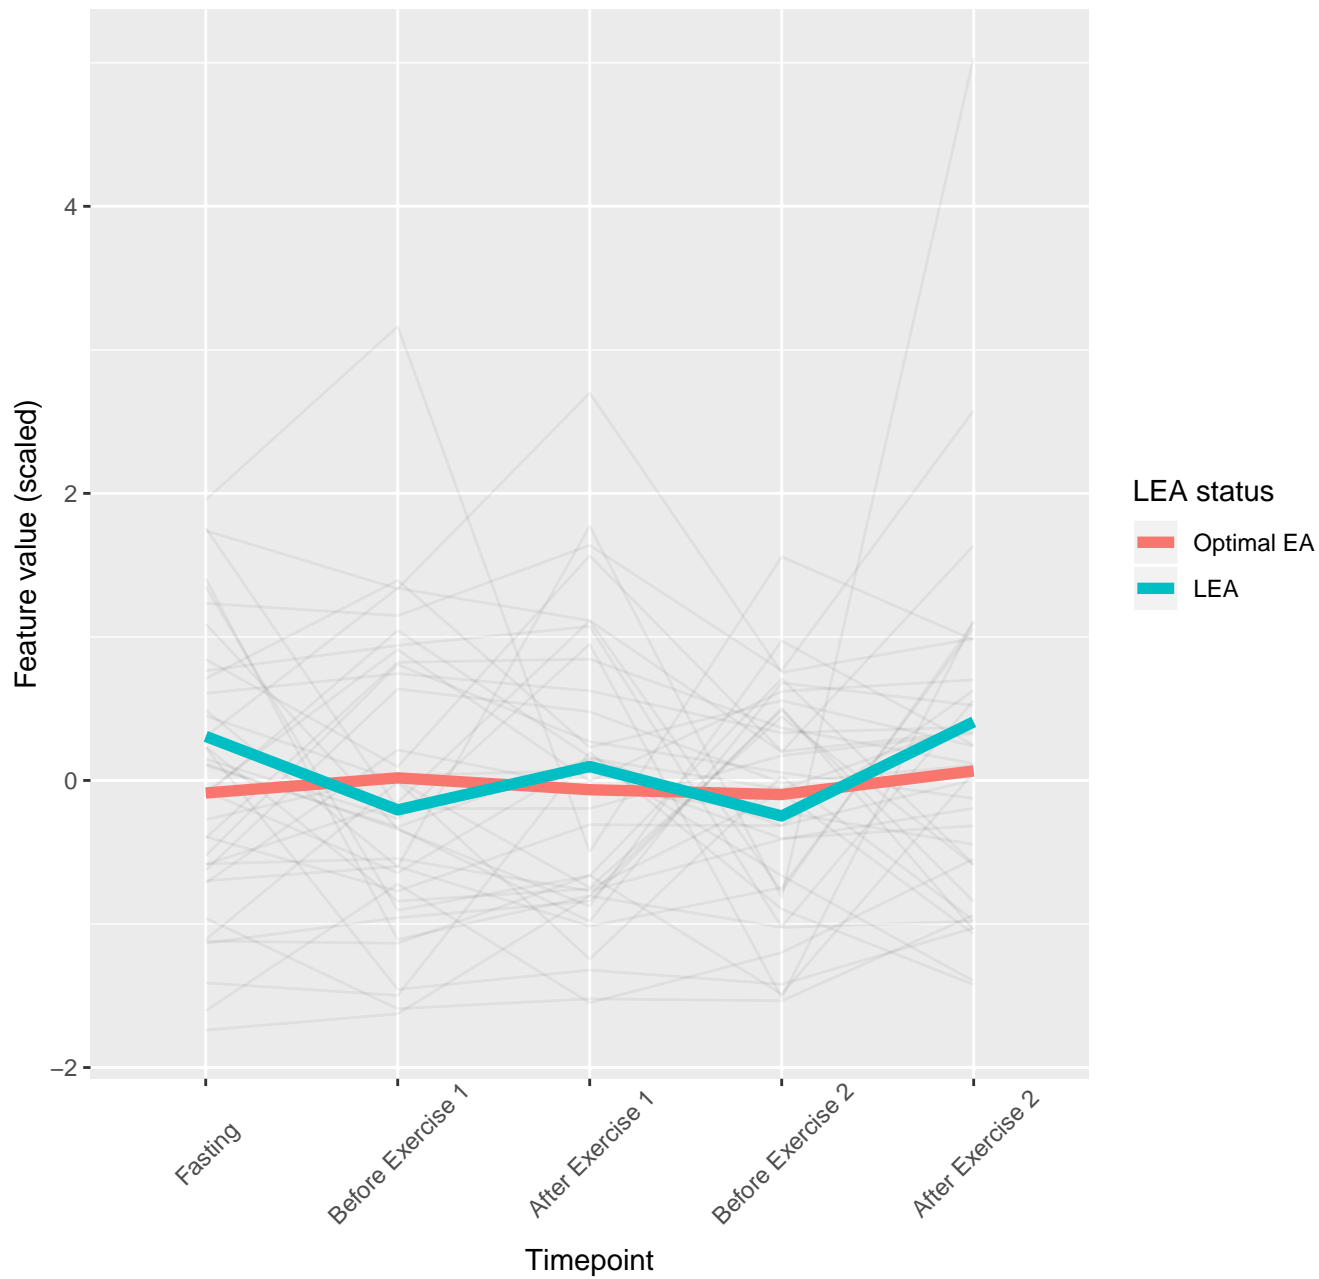

Line plot of PC(O-36:3)

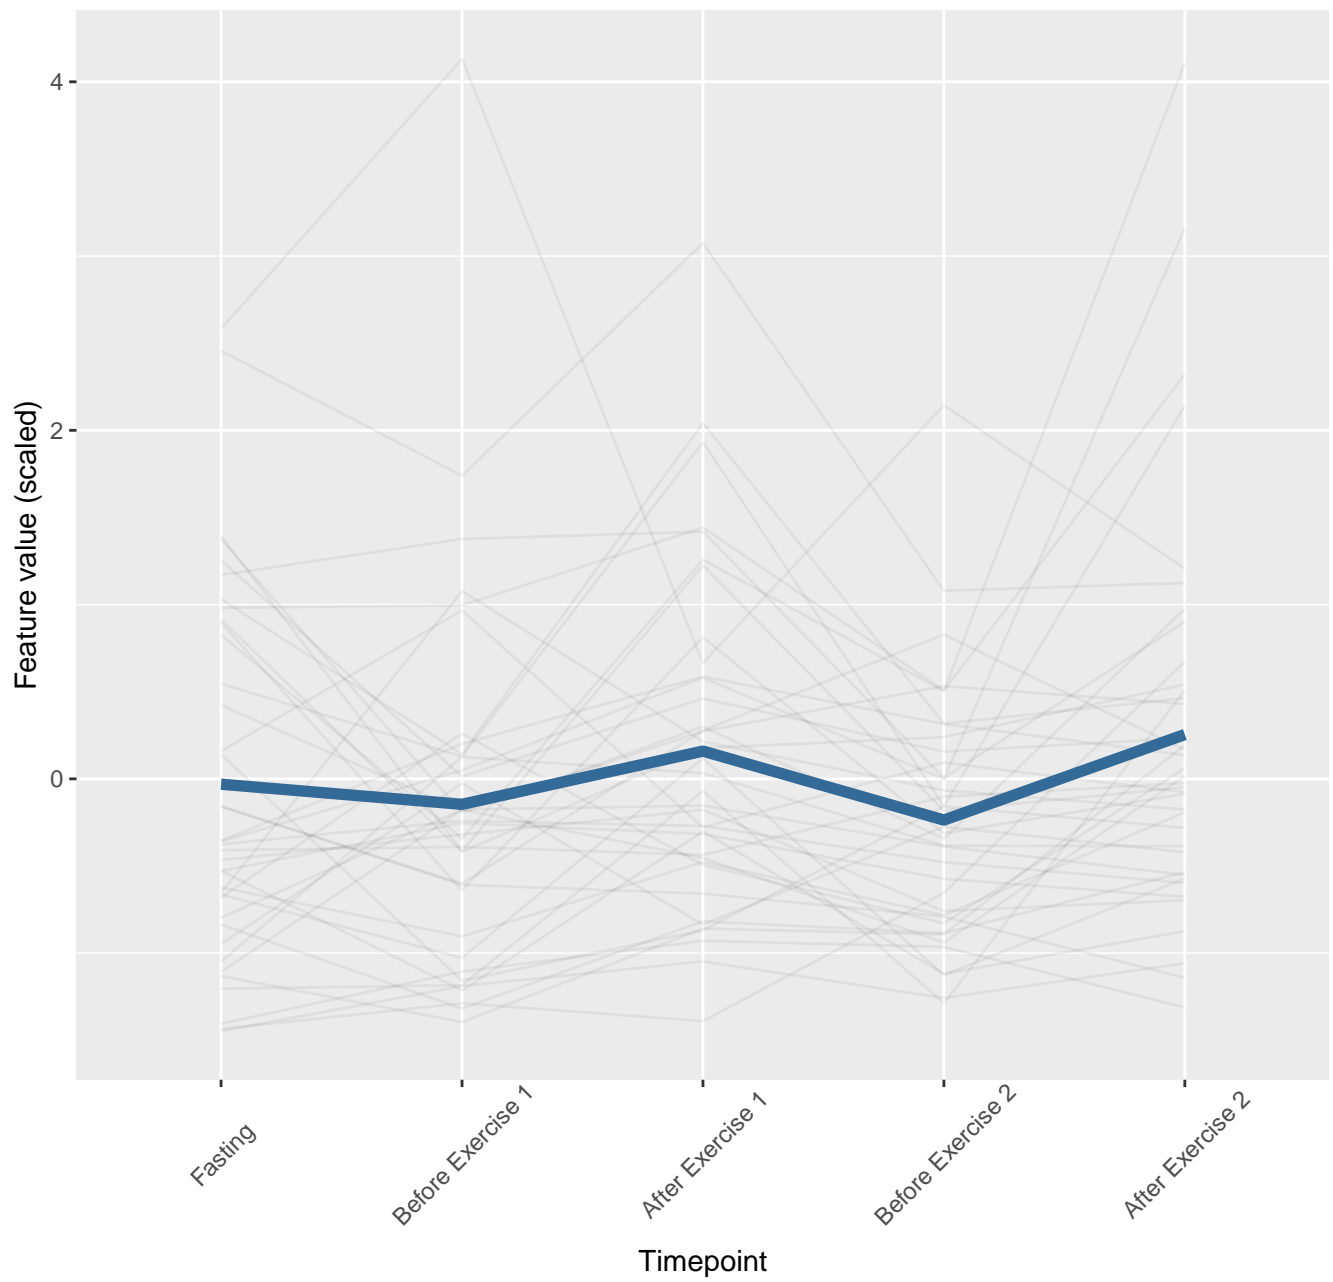

Line plot of PC(O-36:3)

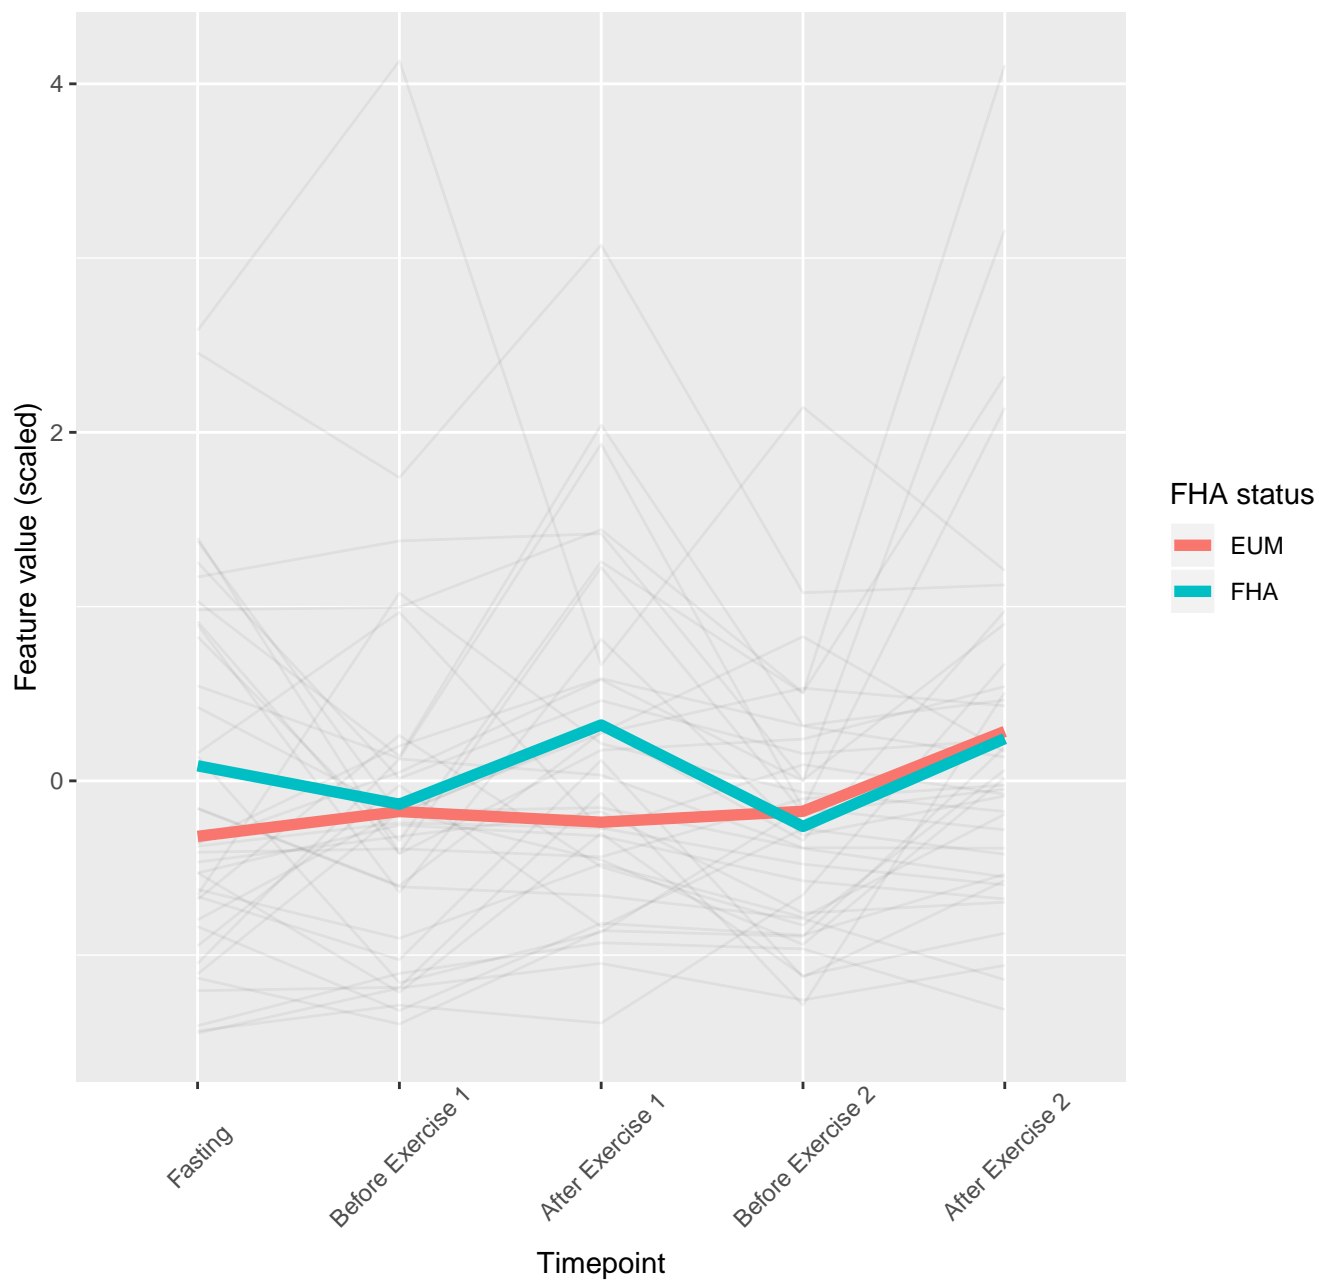

Line plot of PC(O-36:3)

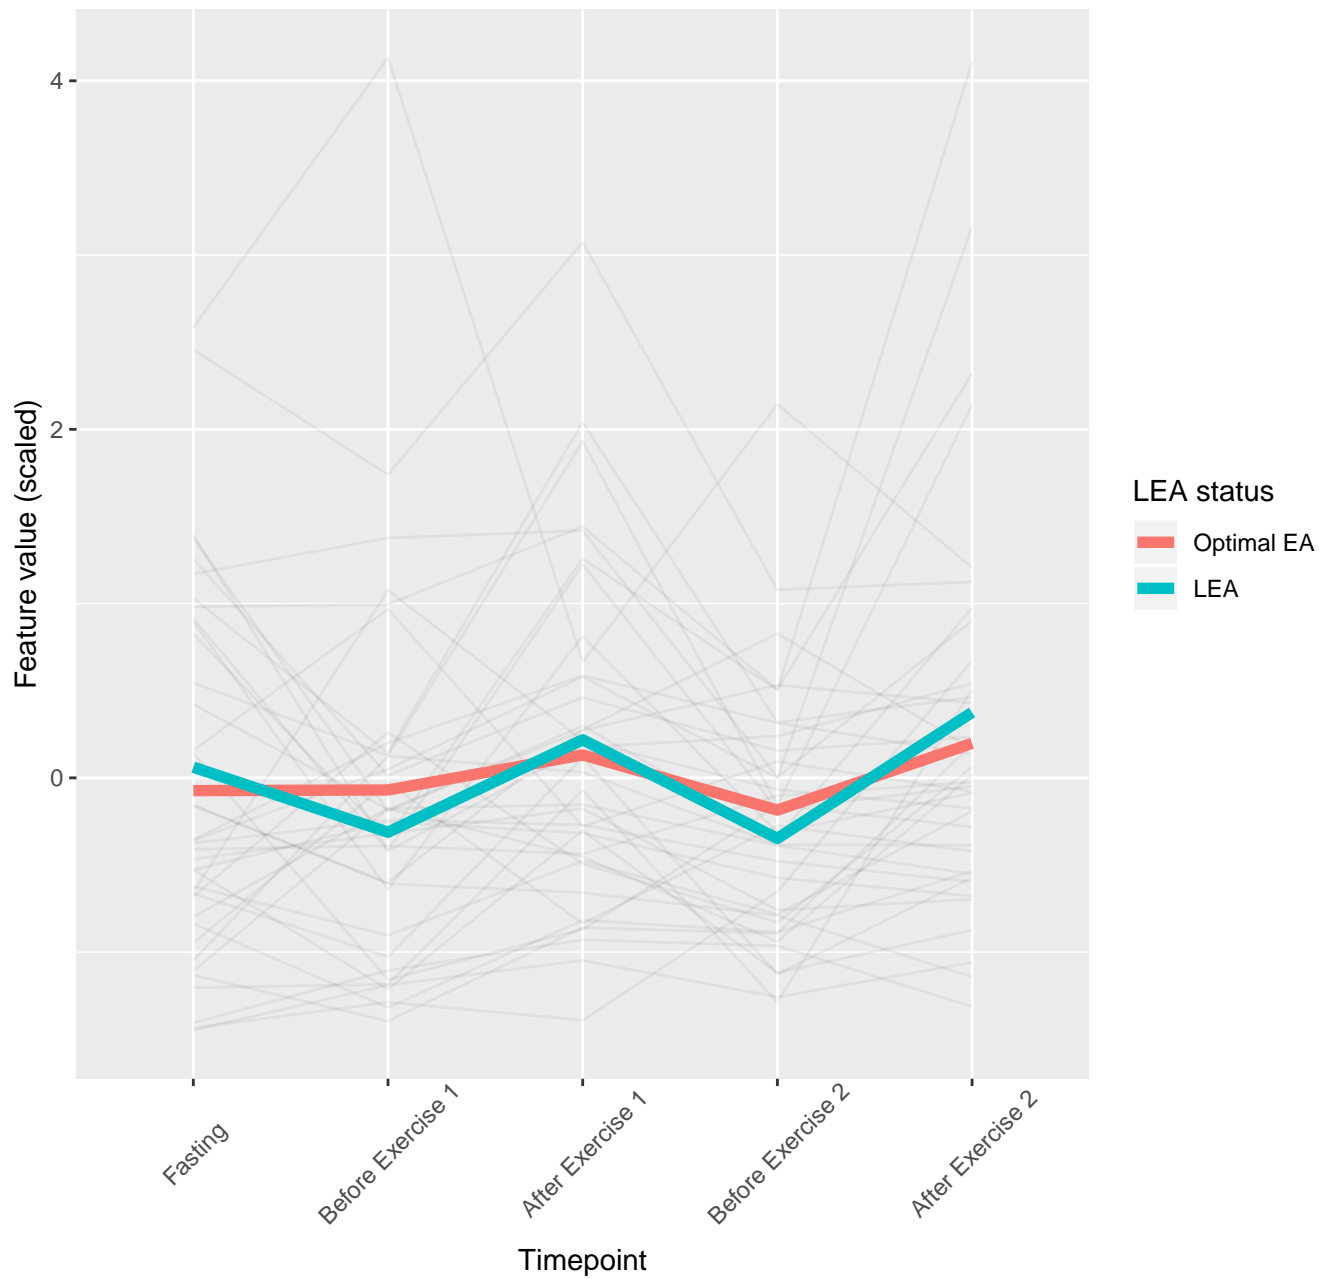

Line plot of PC(O-36:4)

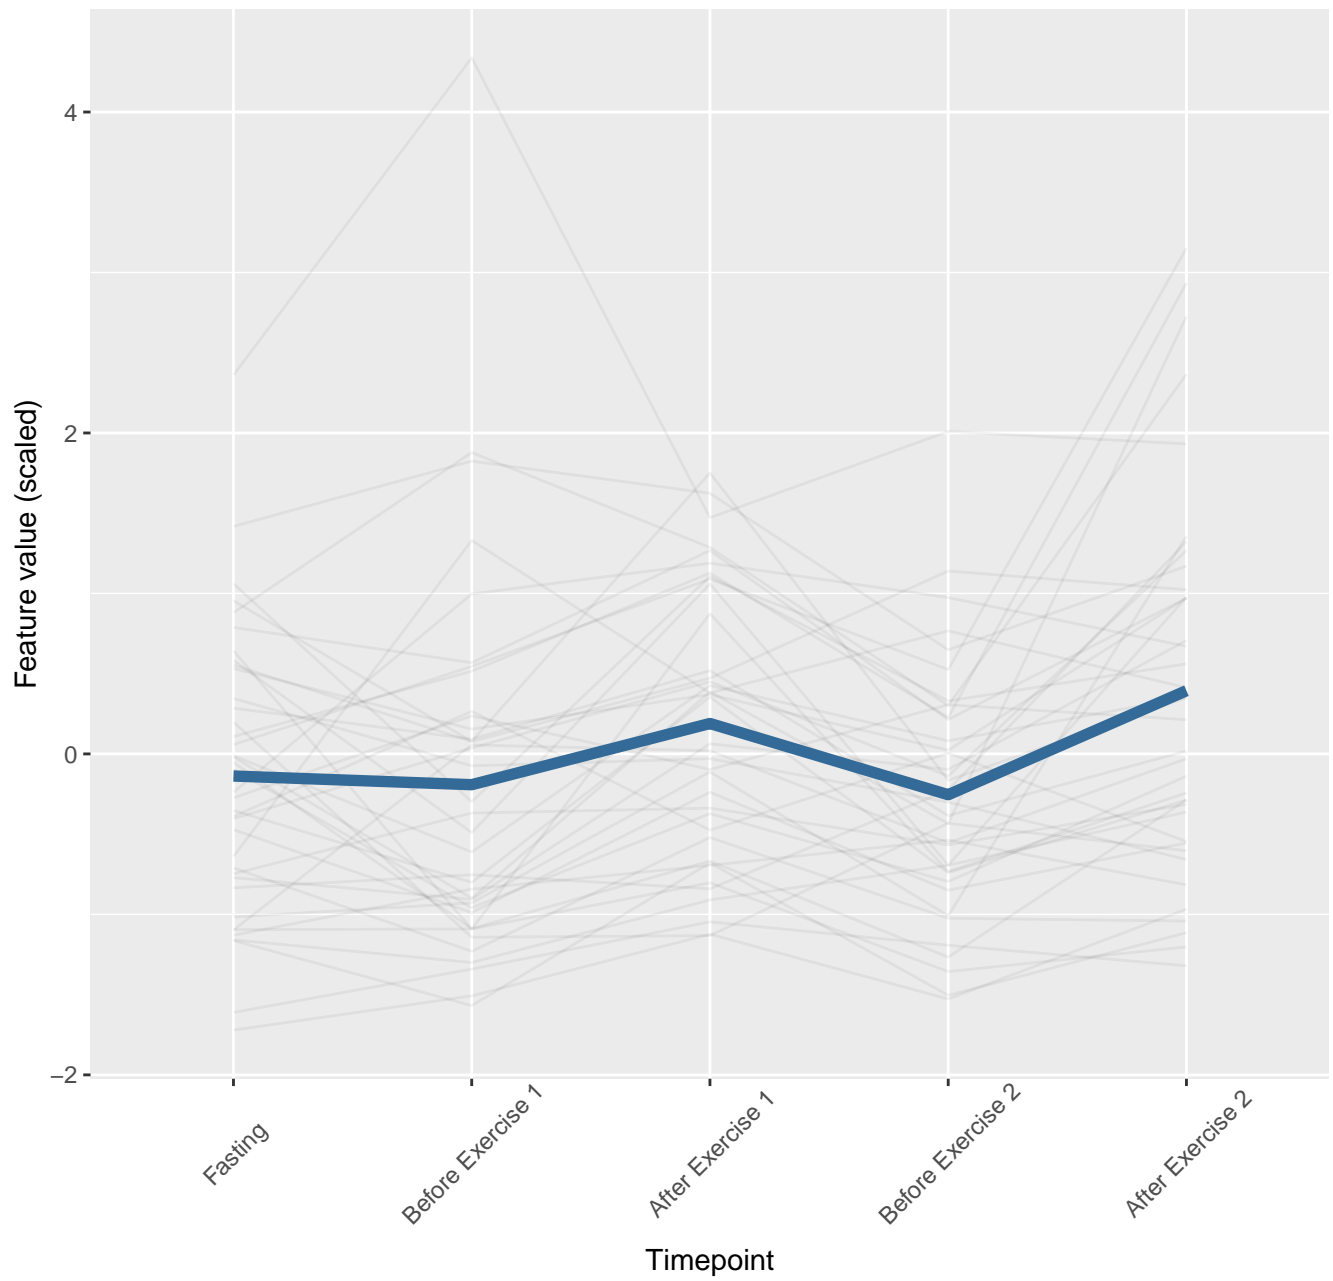

Line plot of PC(O-36:4)

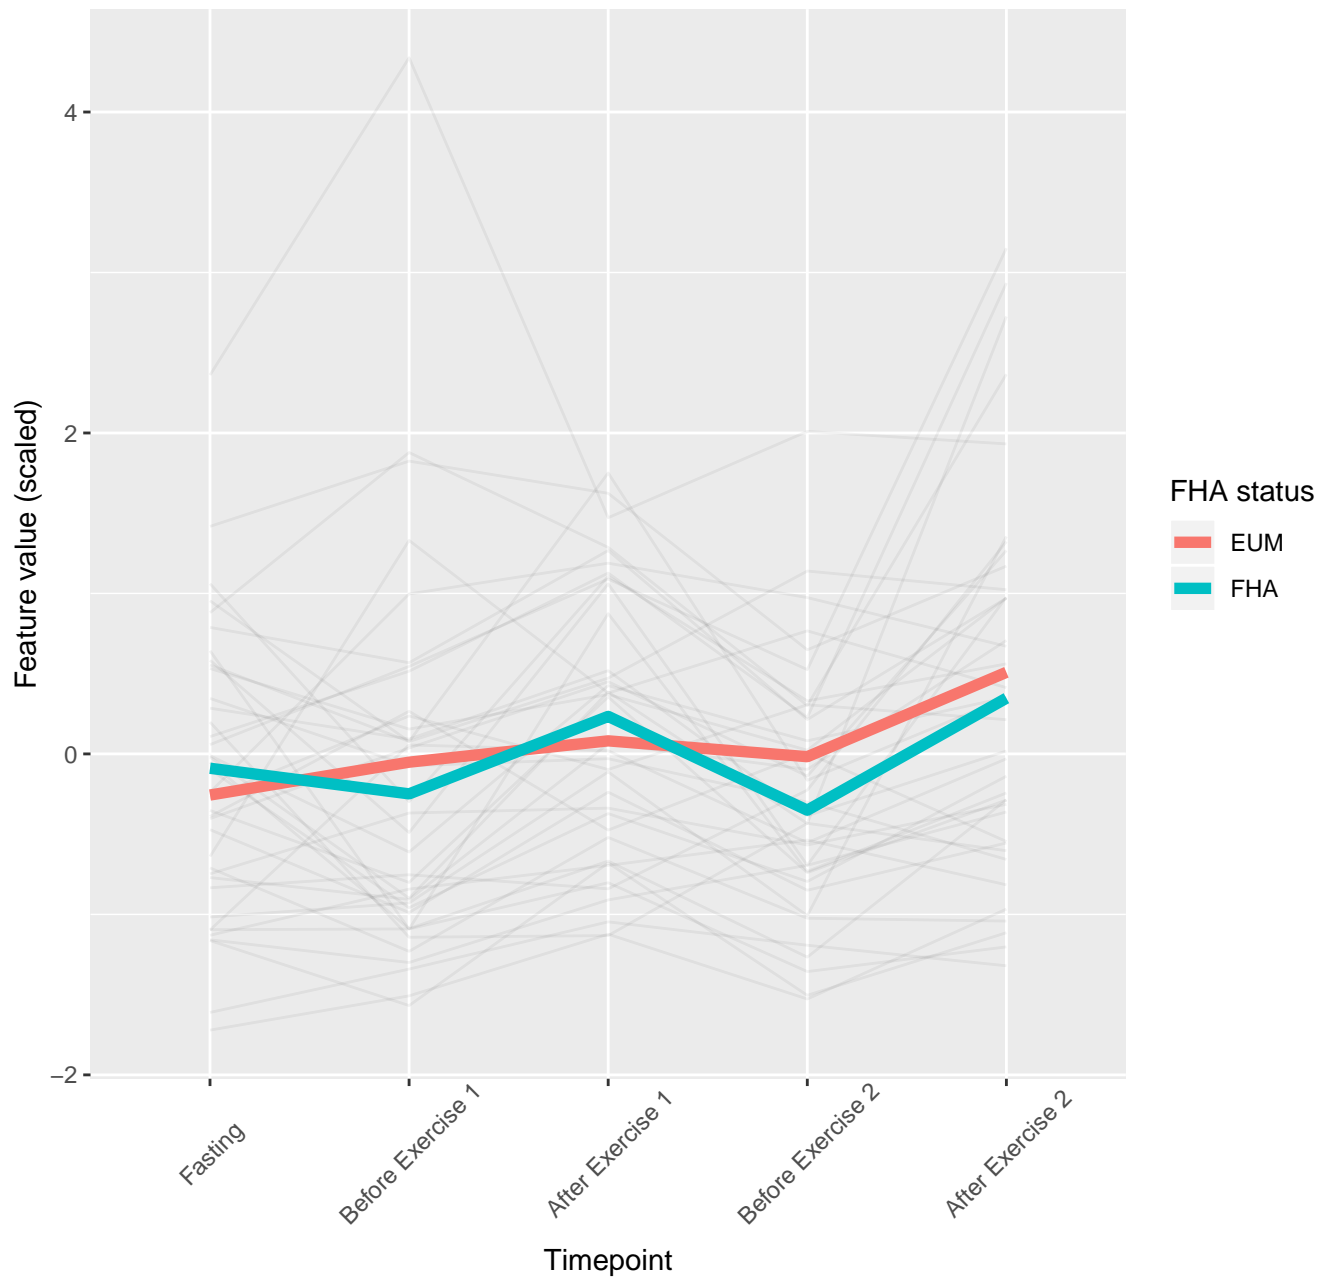

Line plot of PC(O-36:4)

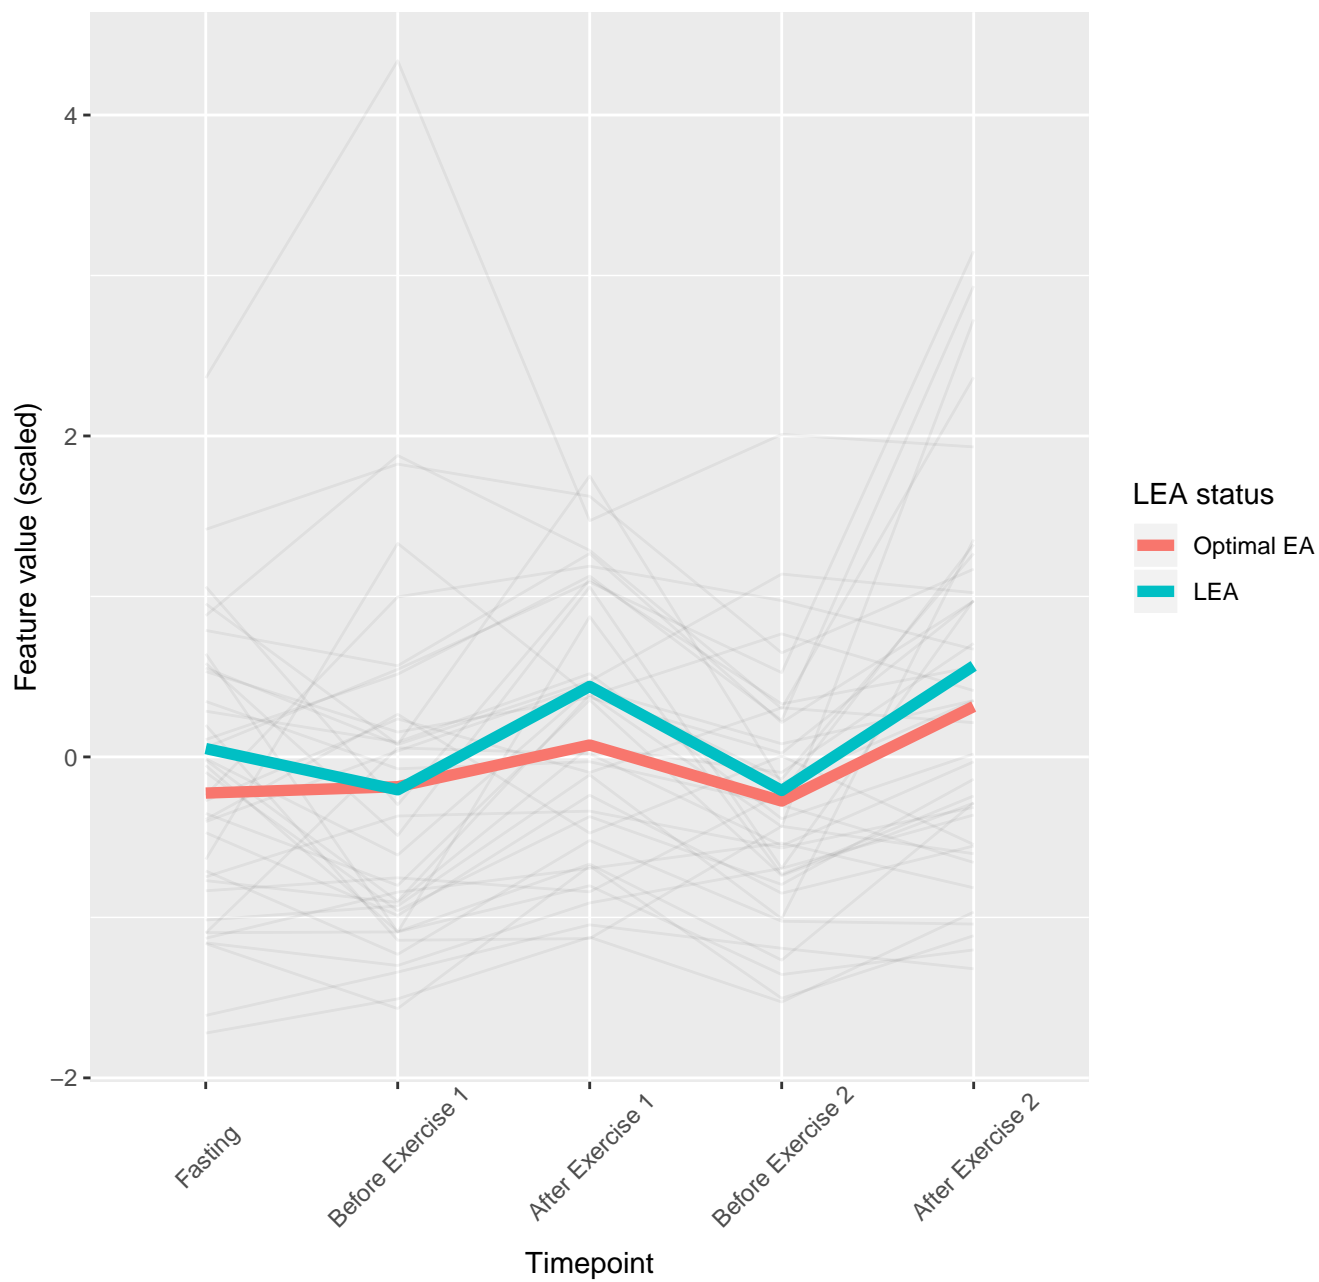

Line plot of PC(O-36:5)

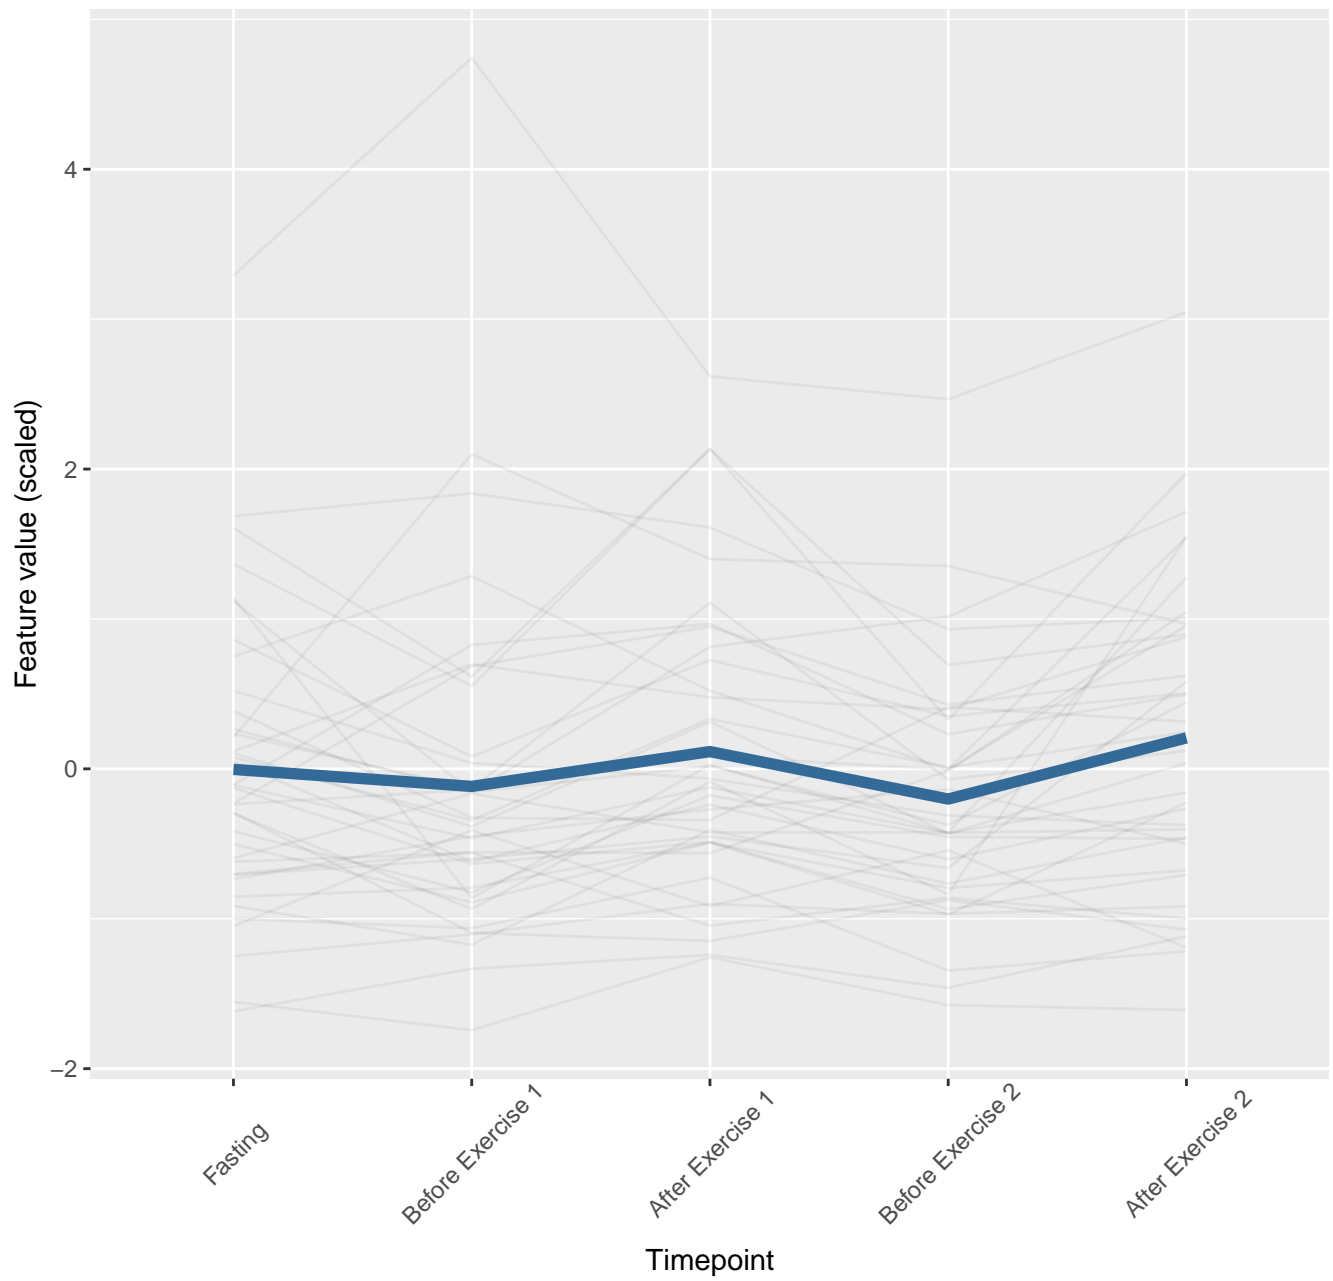



Line plot of PC(O-36:5)

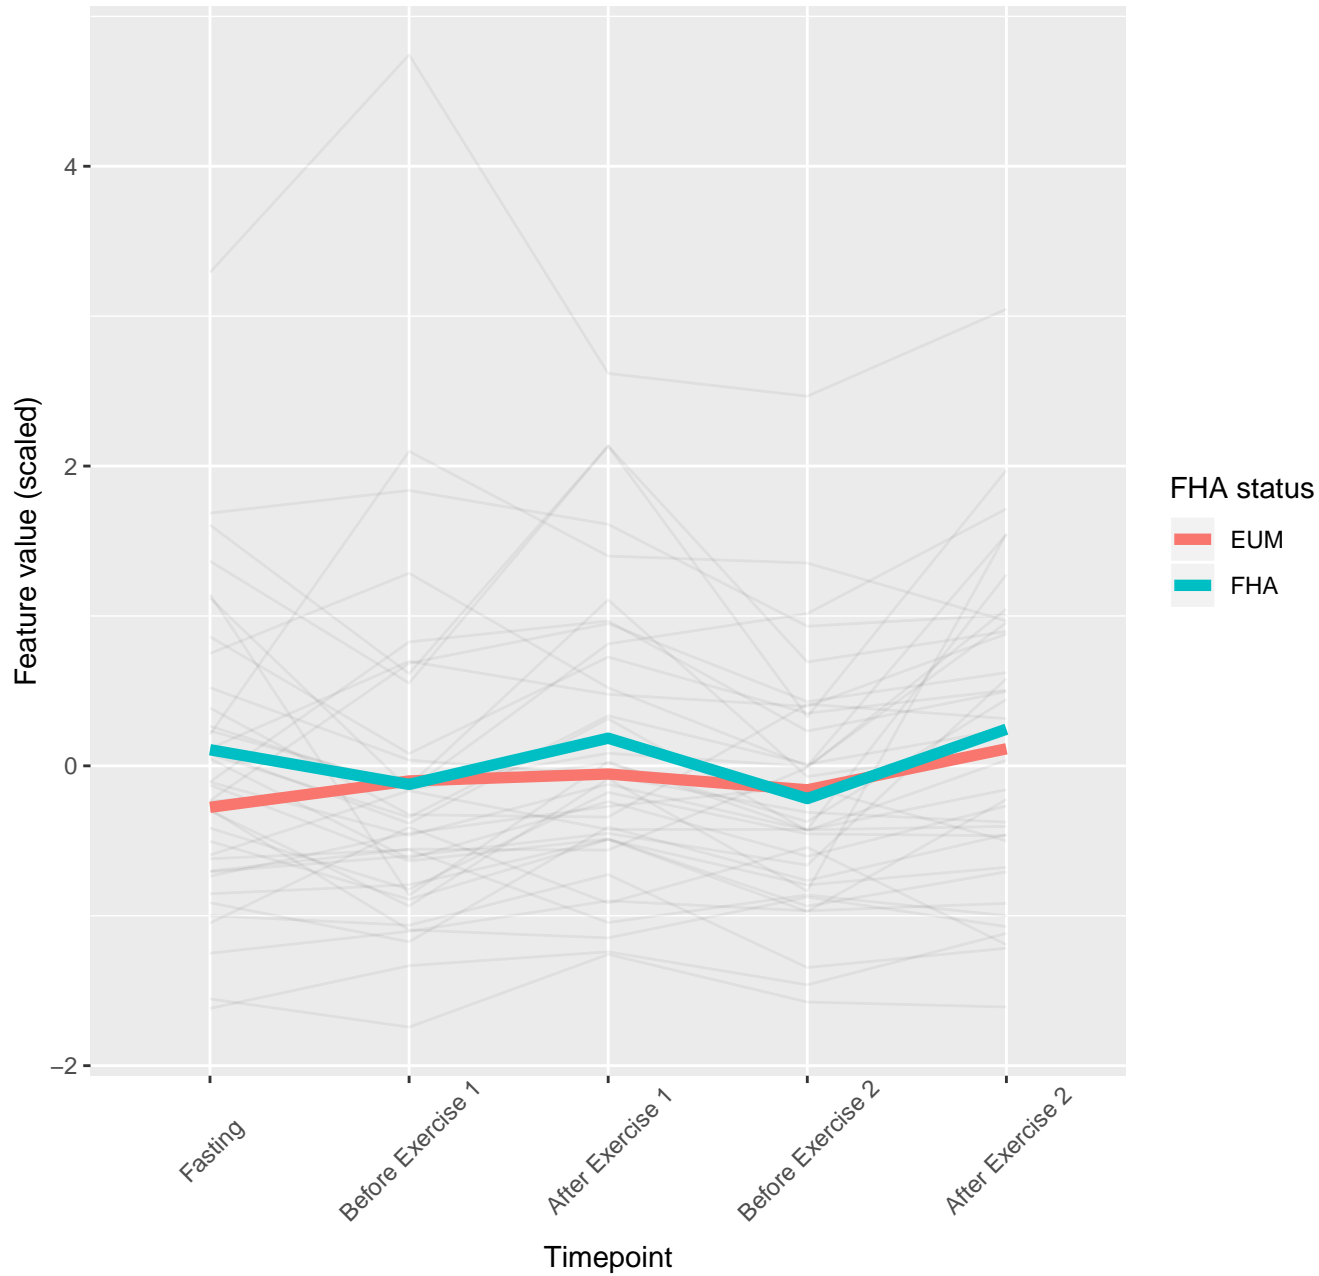

Line plot of PC(O-36:5)

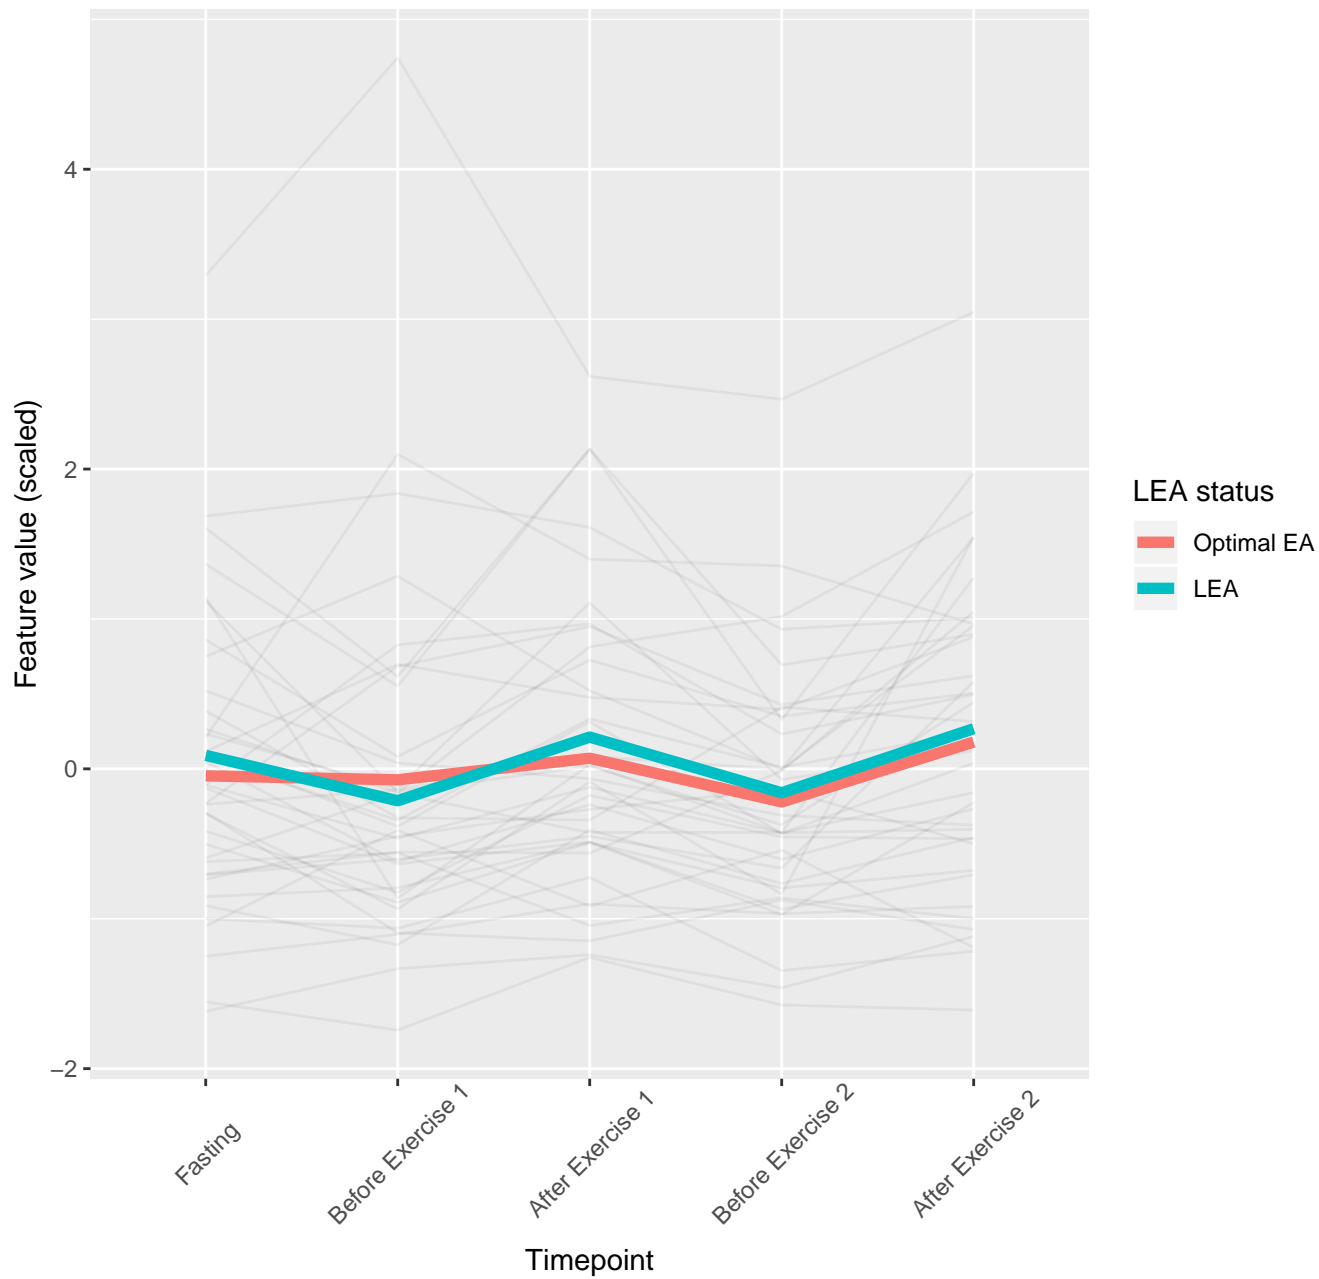

Line plot of PC(O-38:3) or PC(P-38:2)

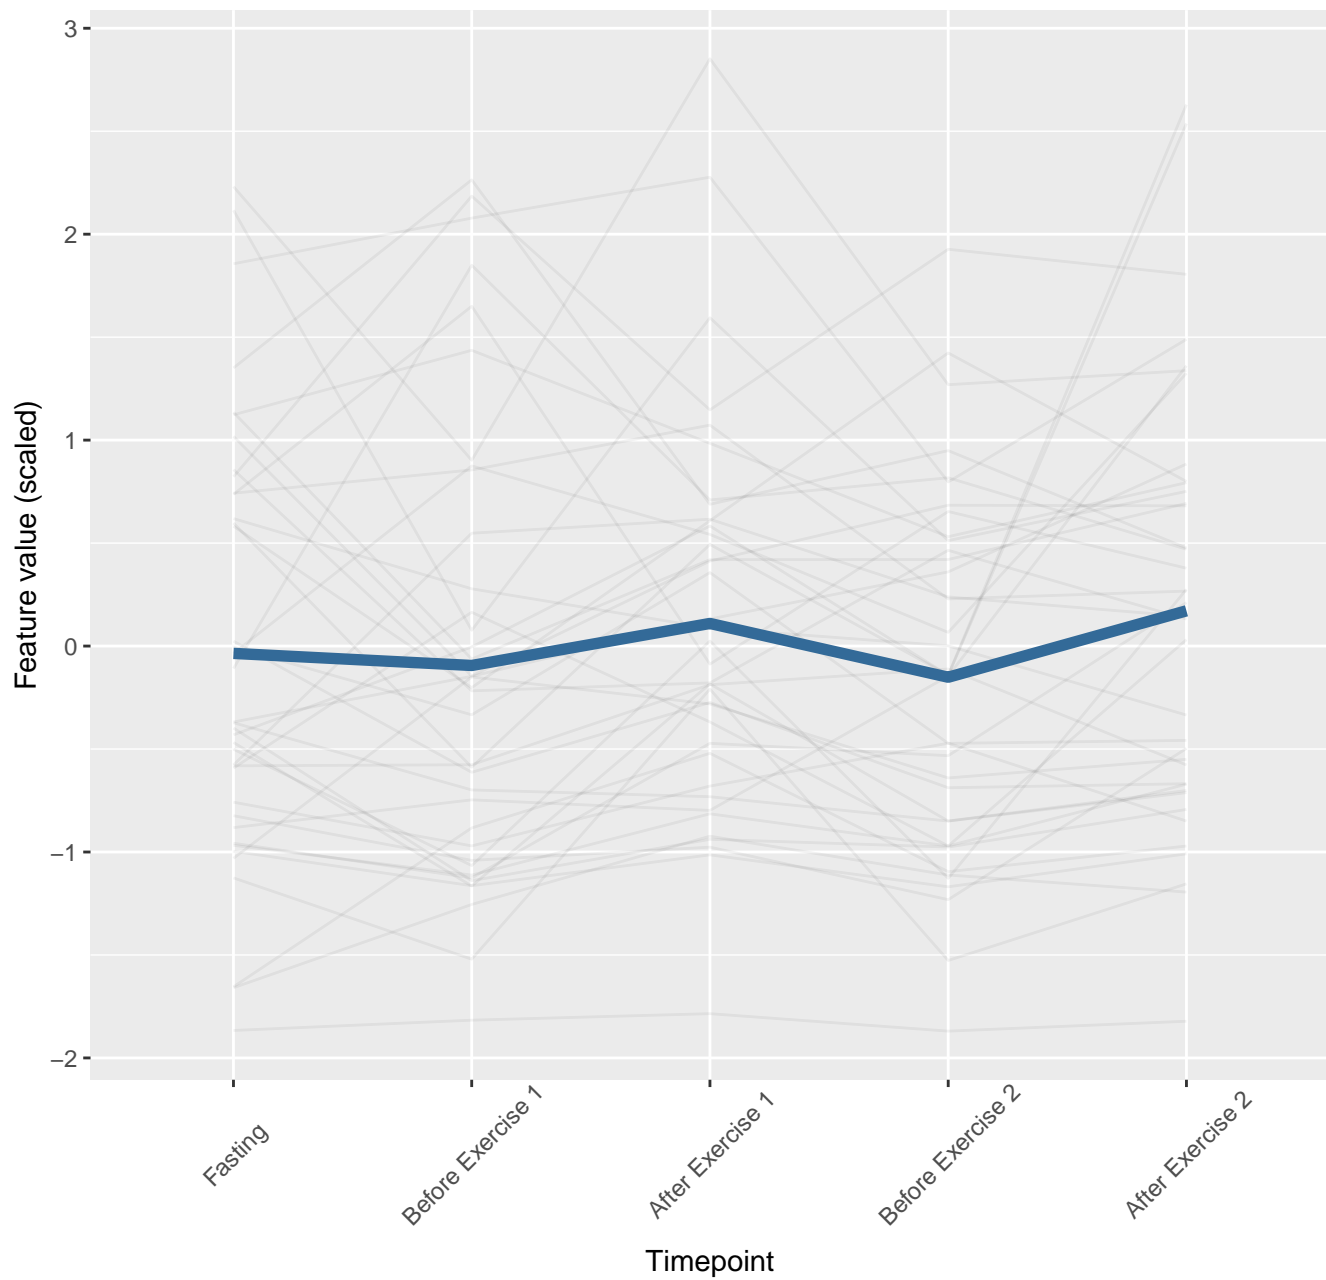

Line plot of PC(O-38:3) or PC(P-38:2)

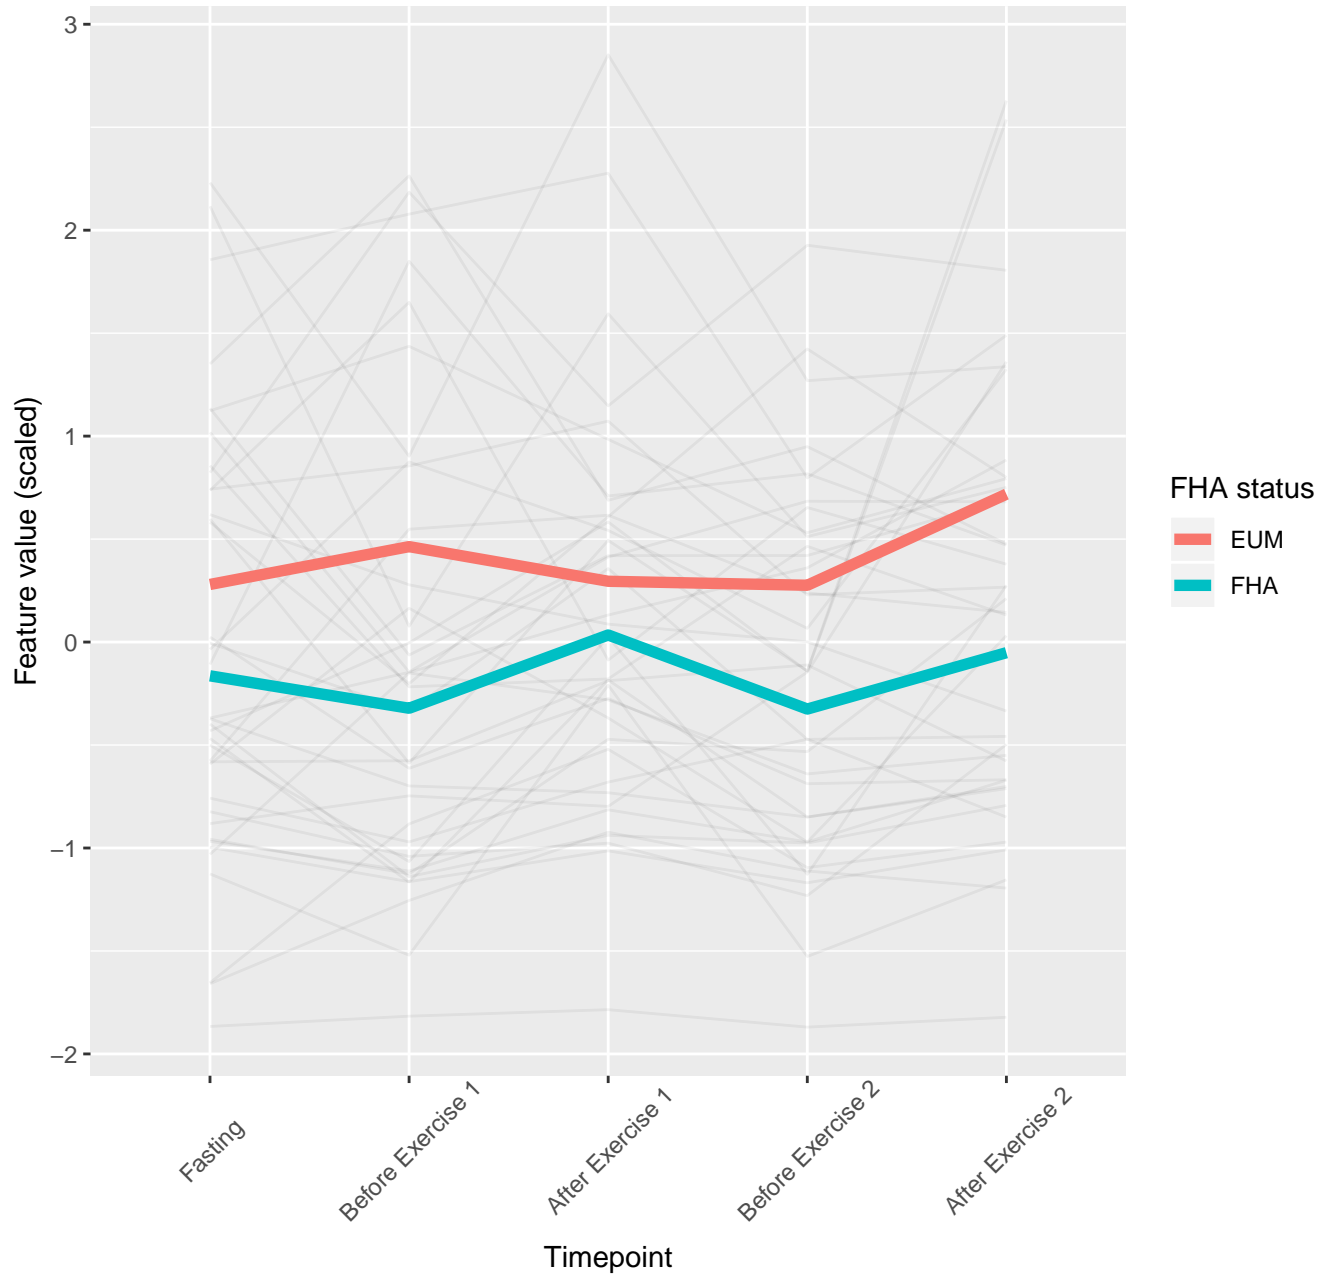

Line plot of PC(O-38:3) or PC(P-38:2)

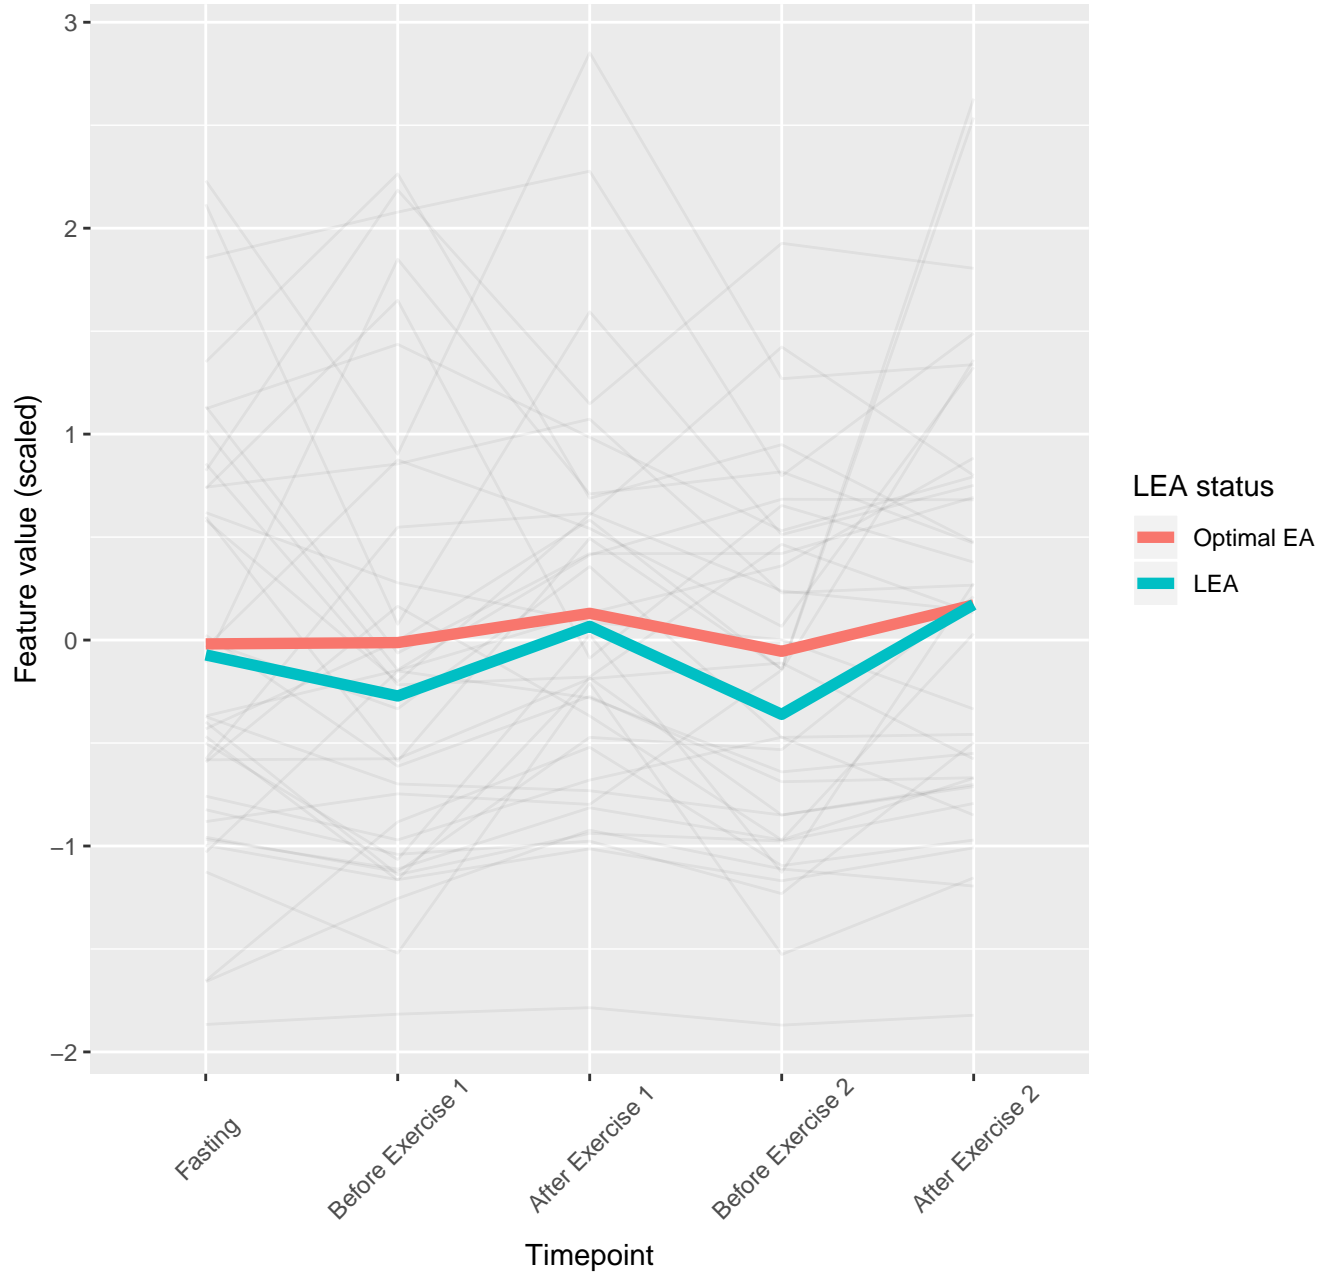

Line plot of PC(O-38:4)

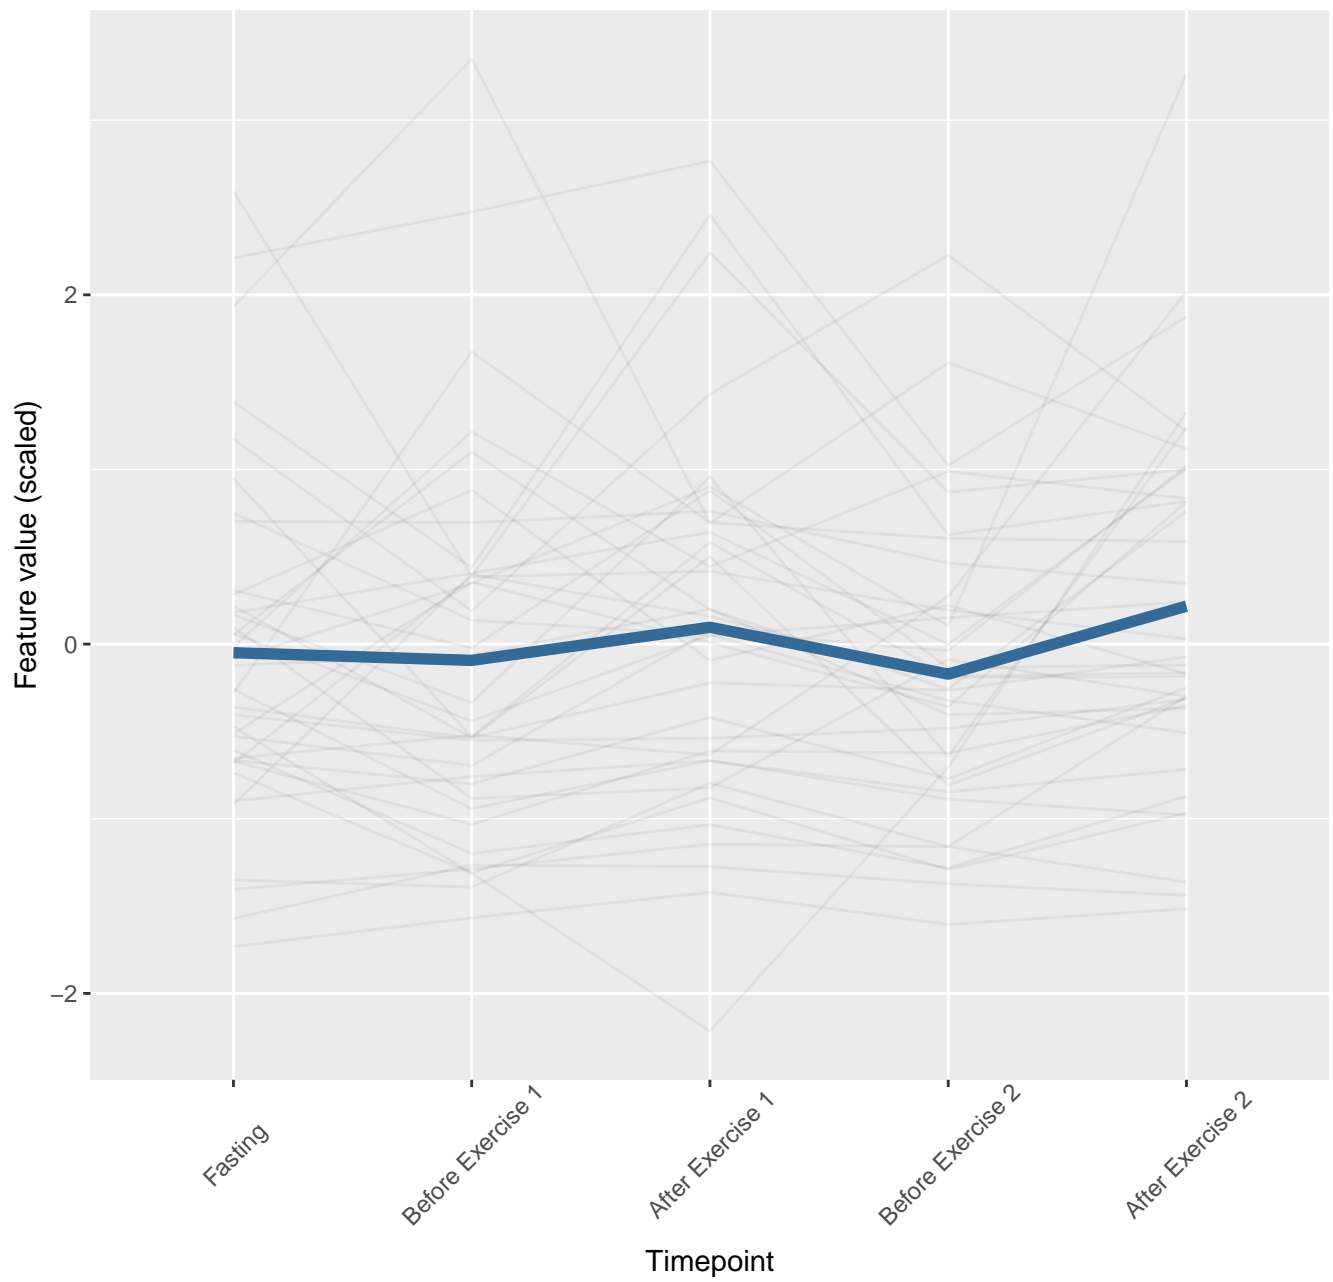

Line plot of PC(O-38:4)

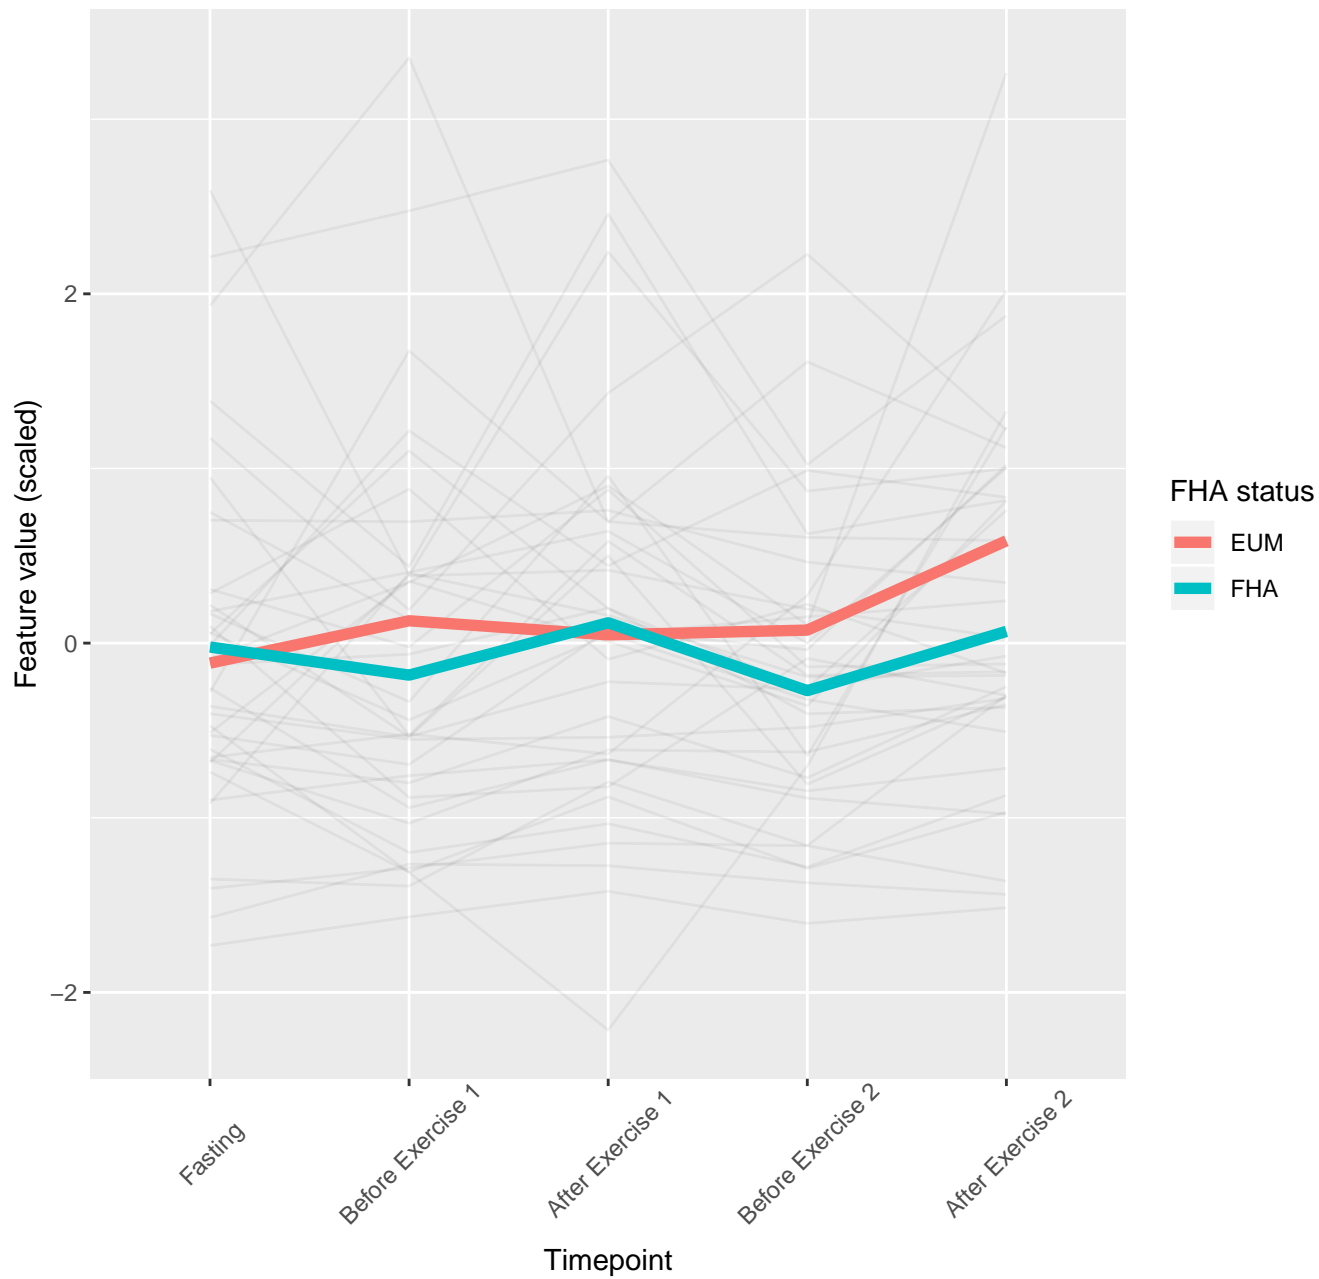

Line plot of PC(O-38:4)

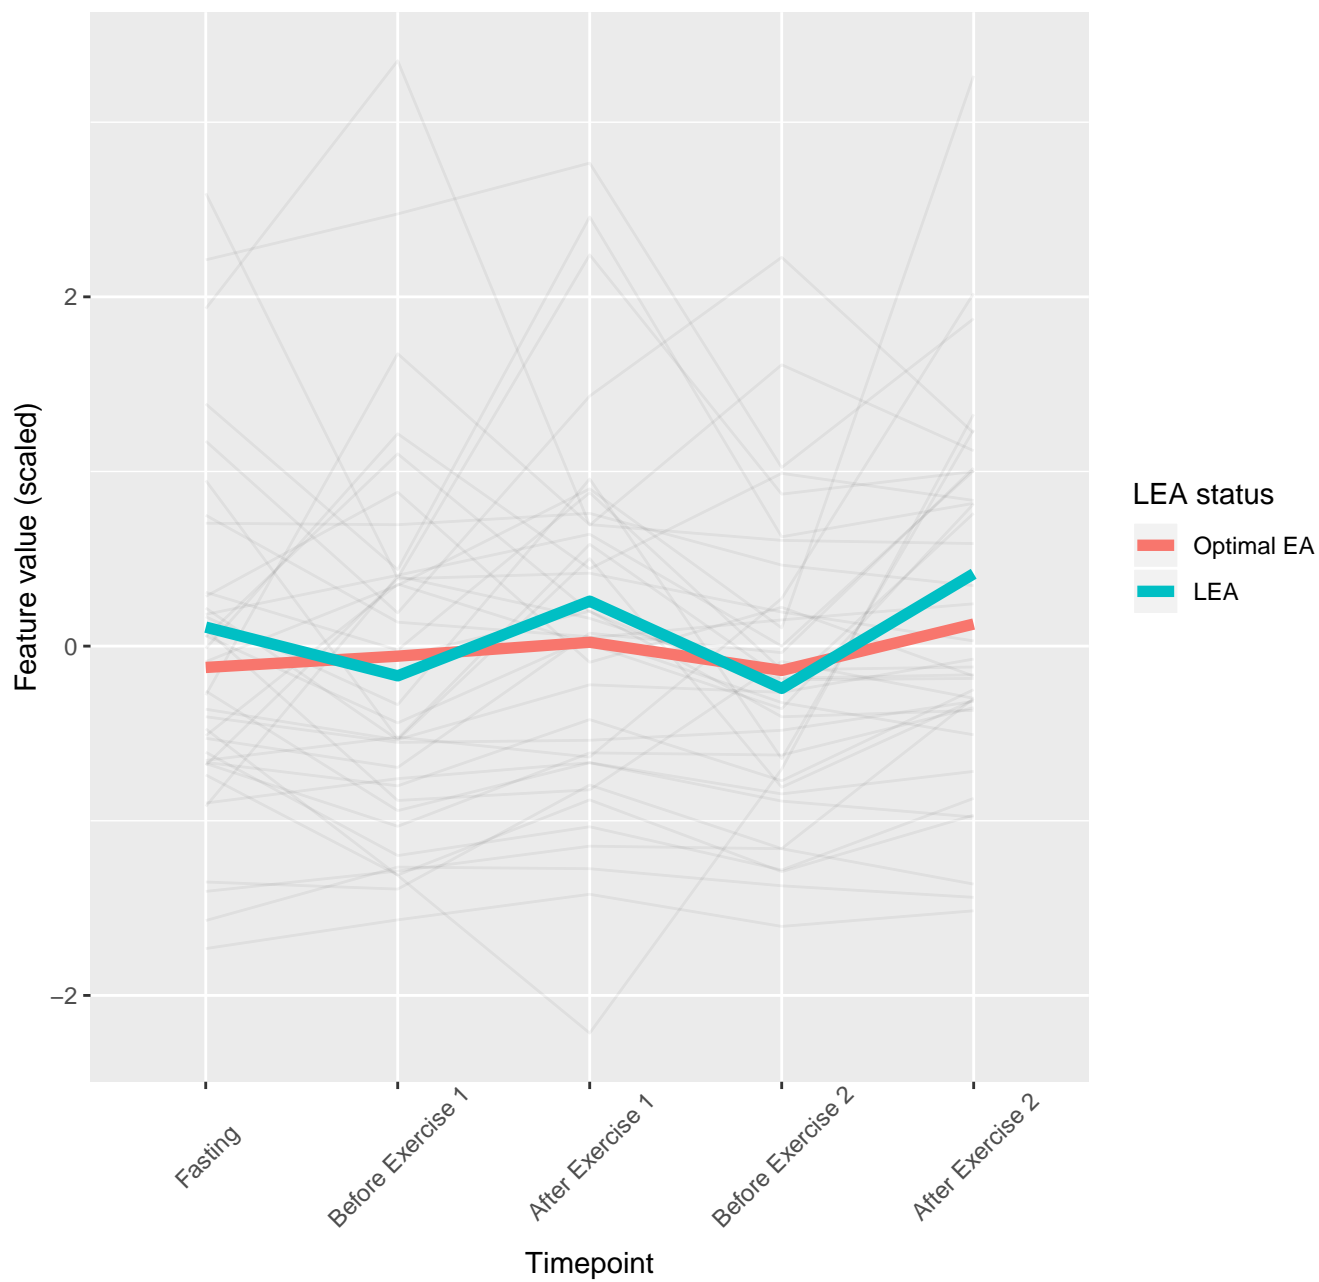



Line plot of PC(O-38:5)

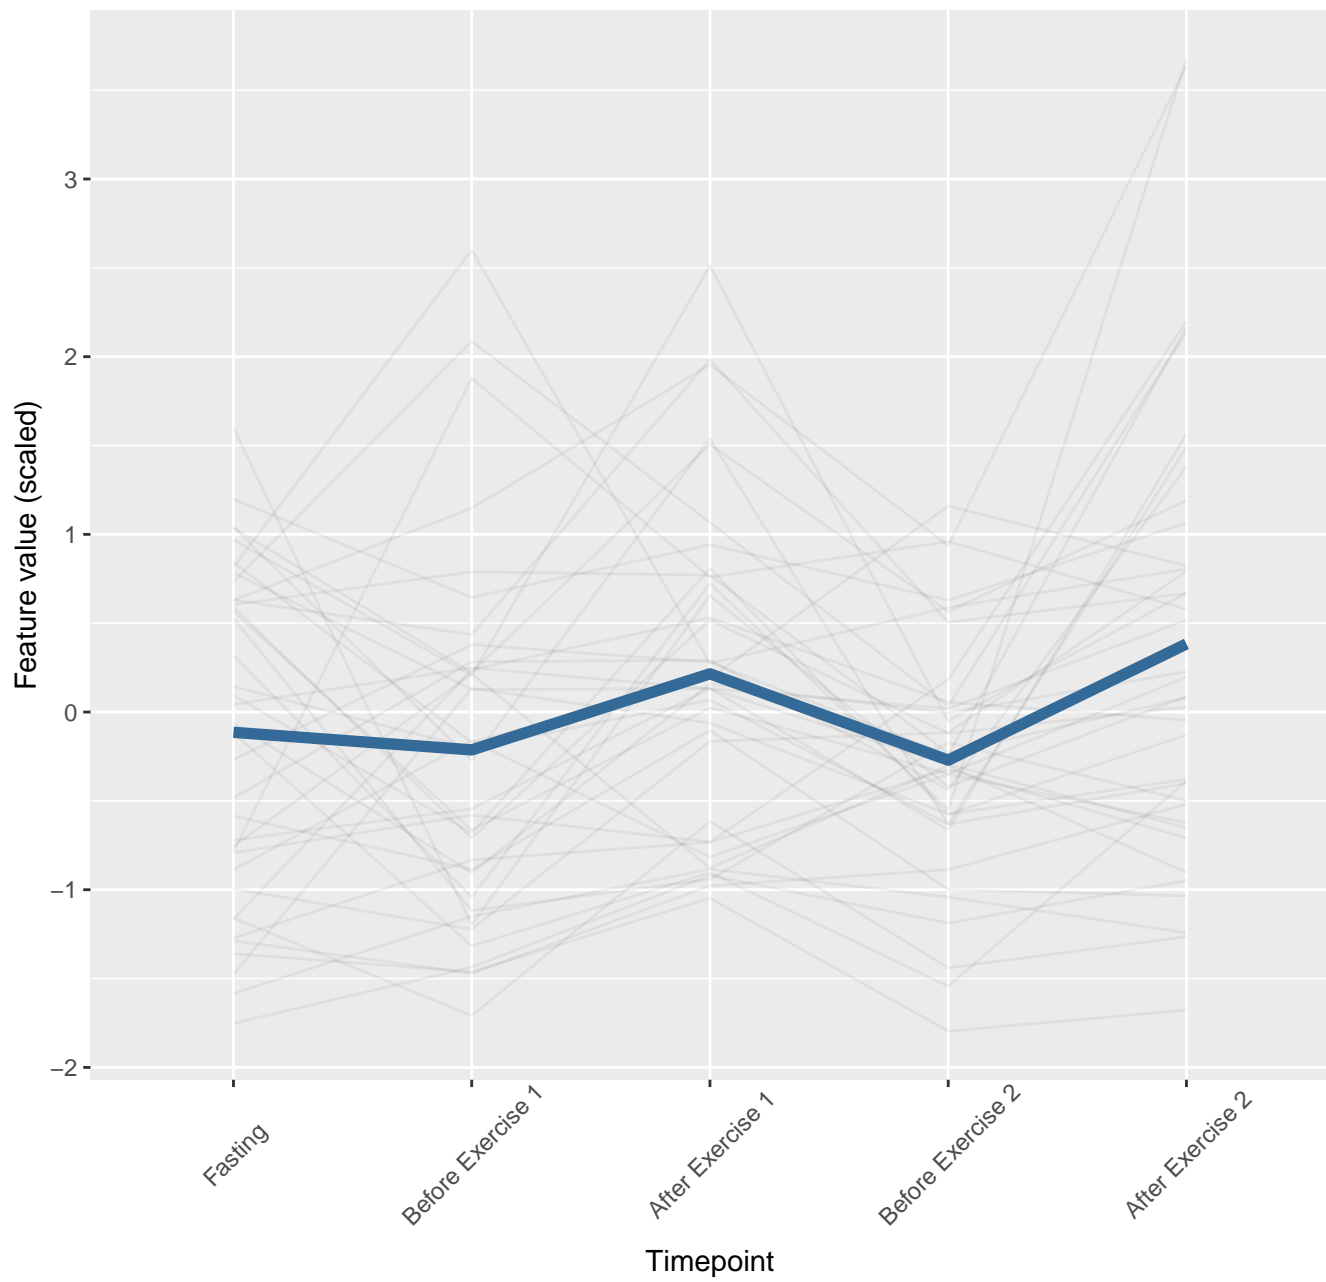

Line plot of PC(O-38:5)

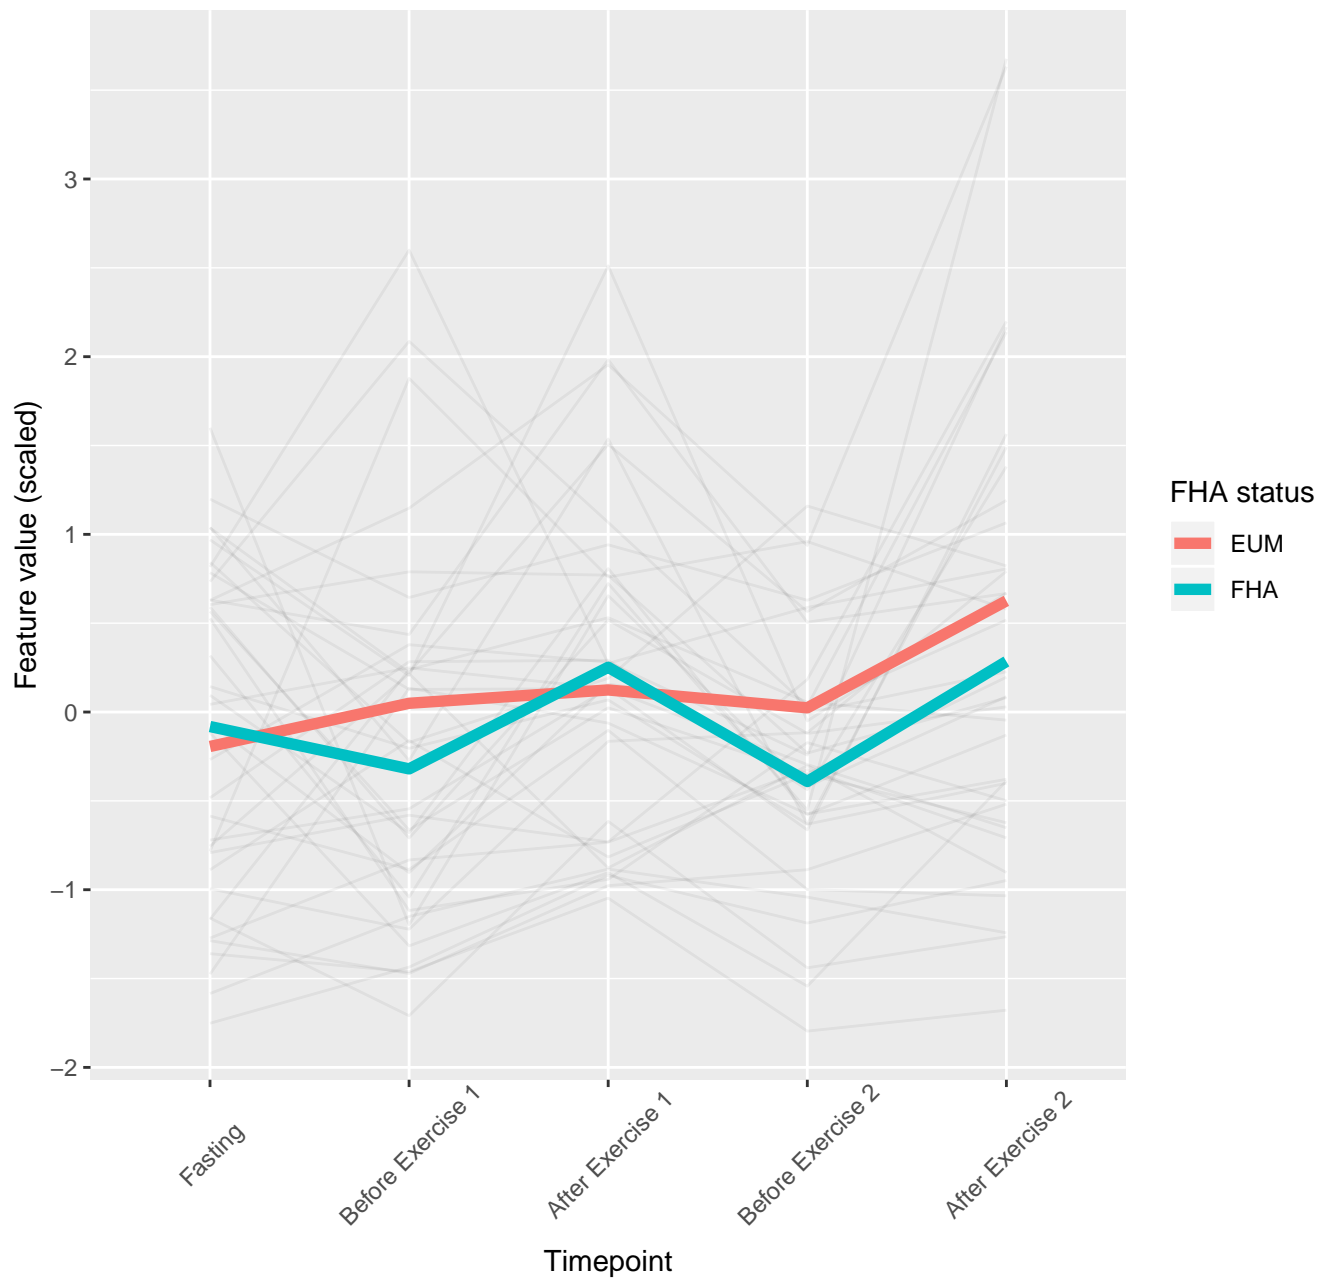

Line plot of PC(O-38:5)

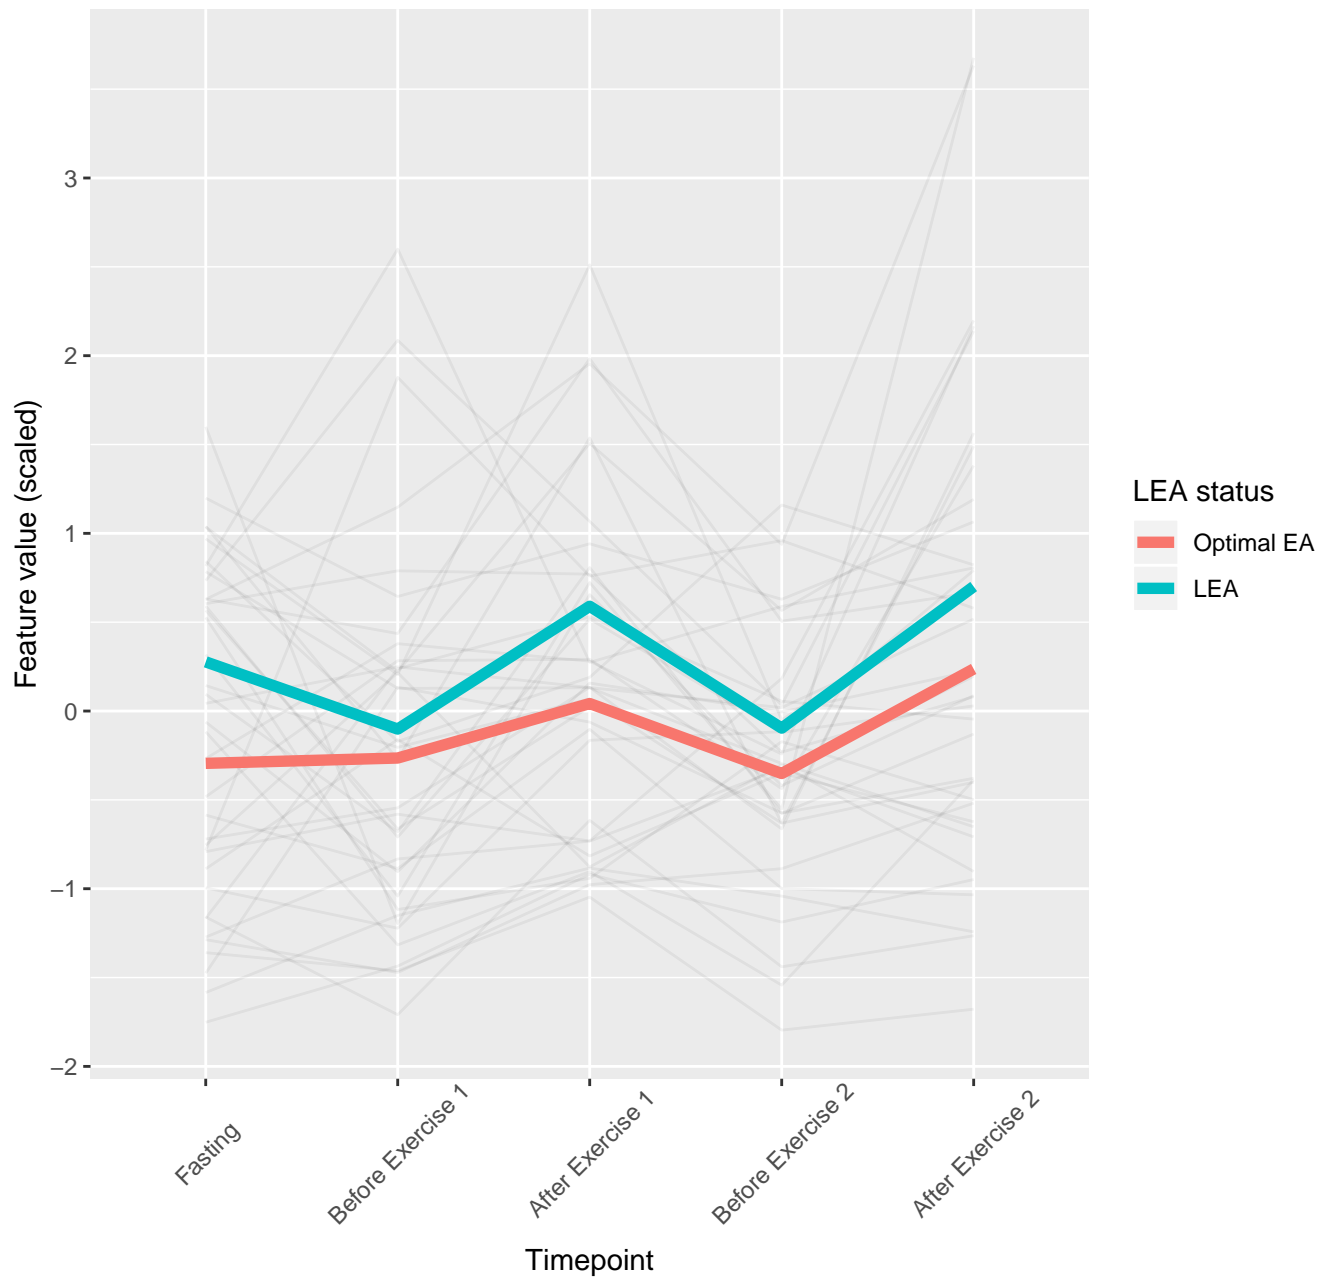

Line plot of PC(O-38:6)

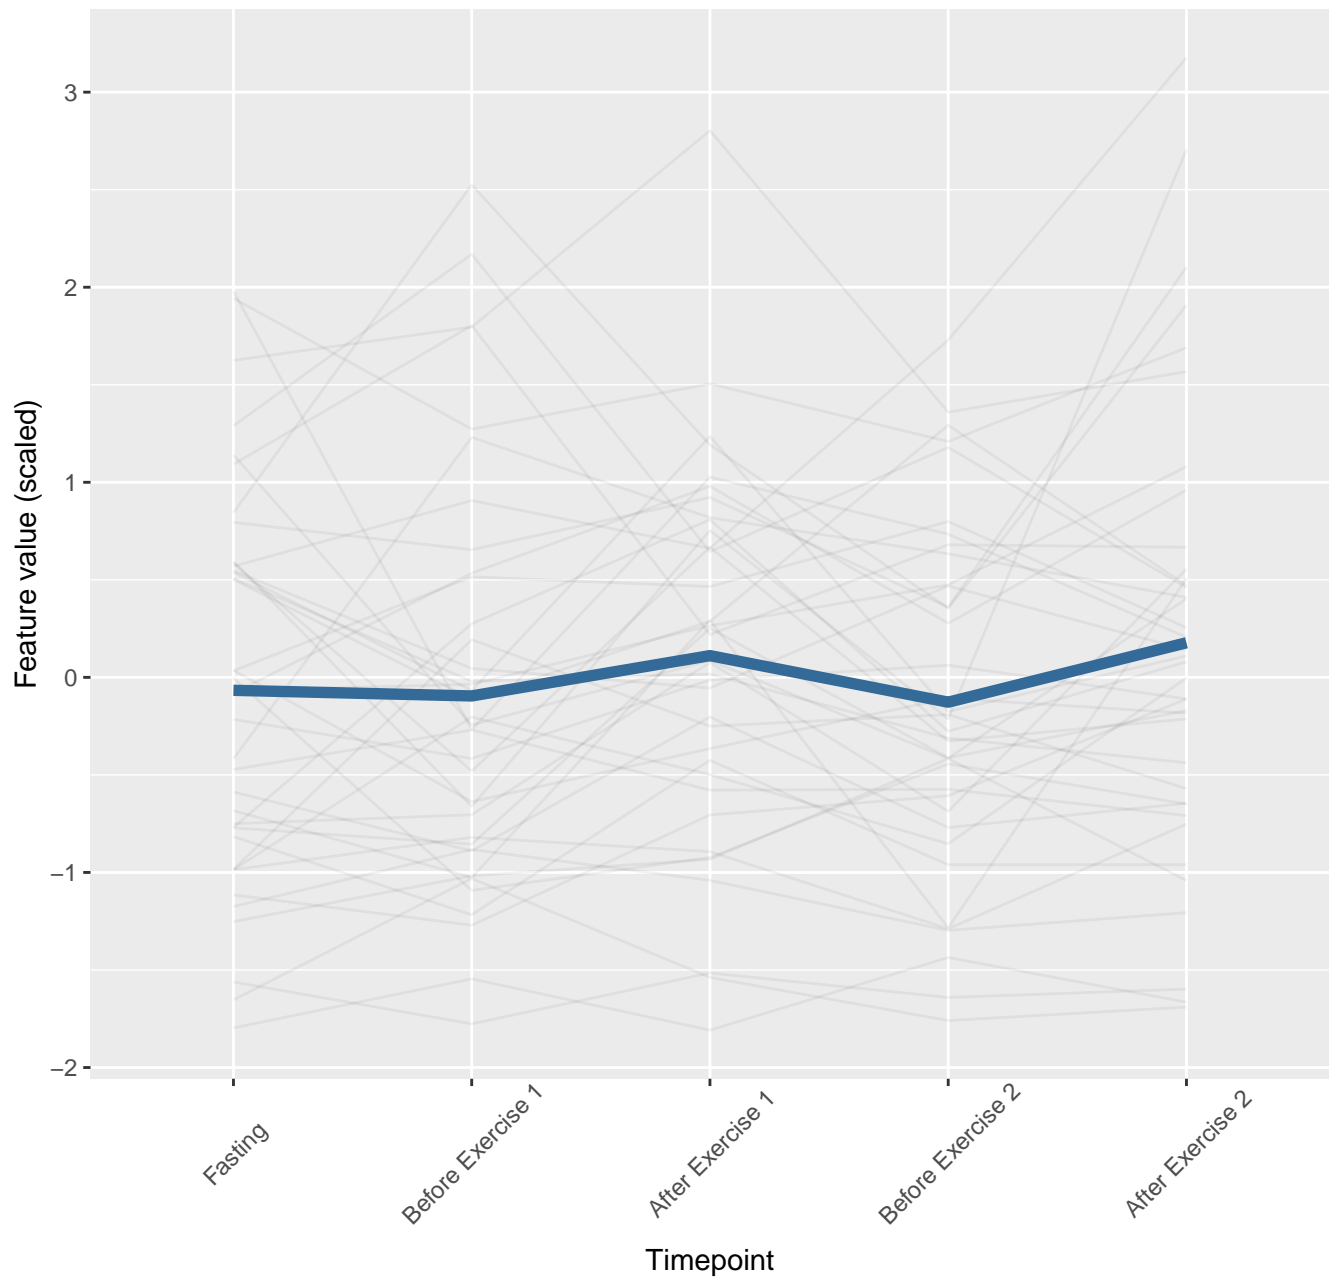

Line plot of PC(O-38:6)

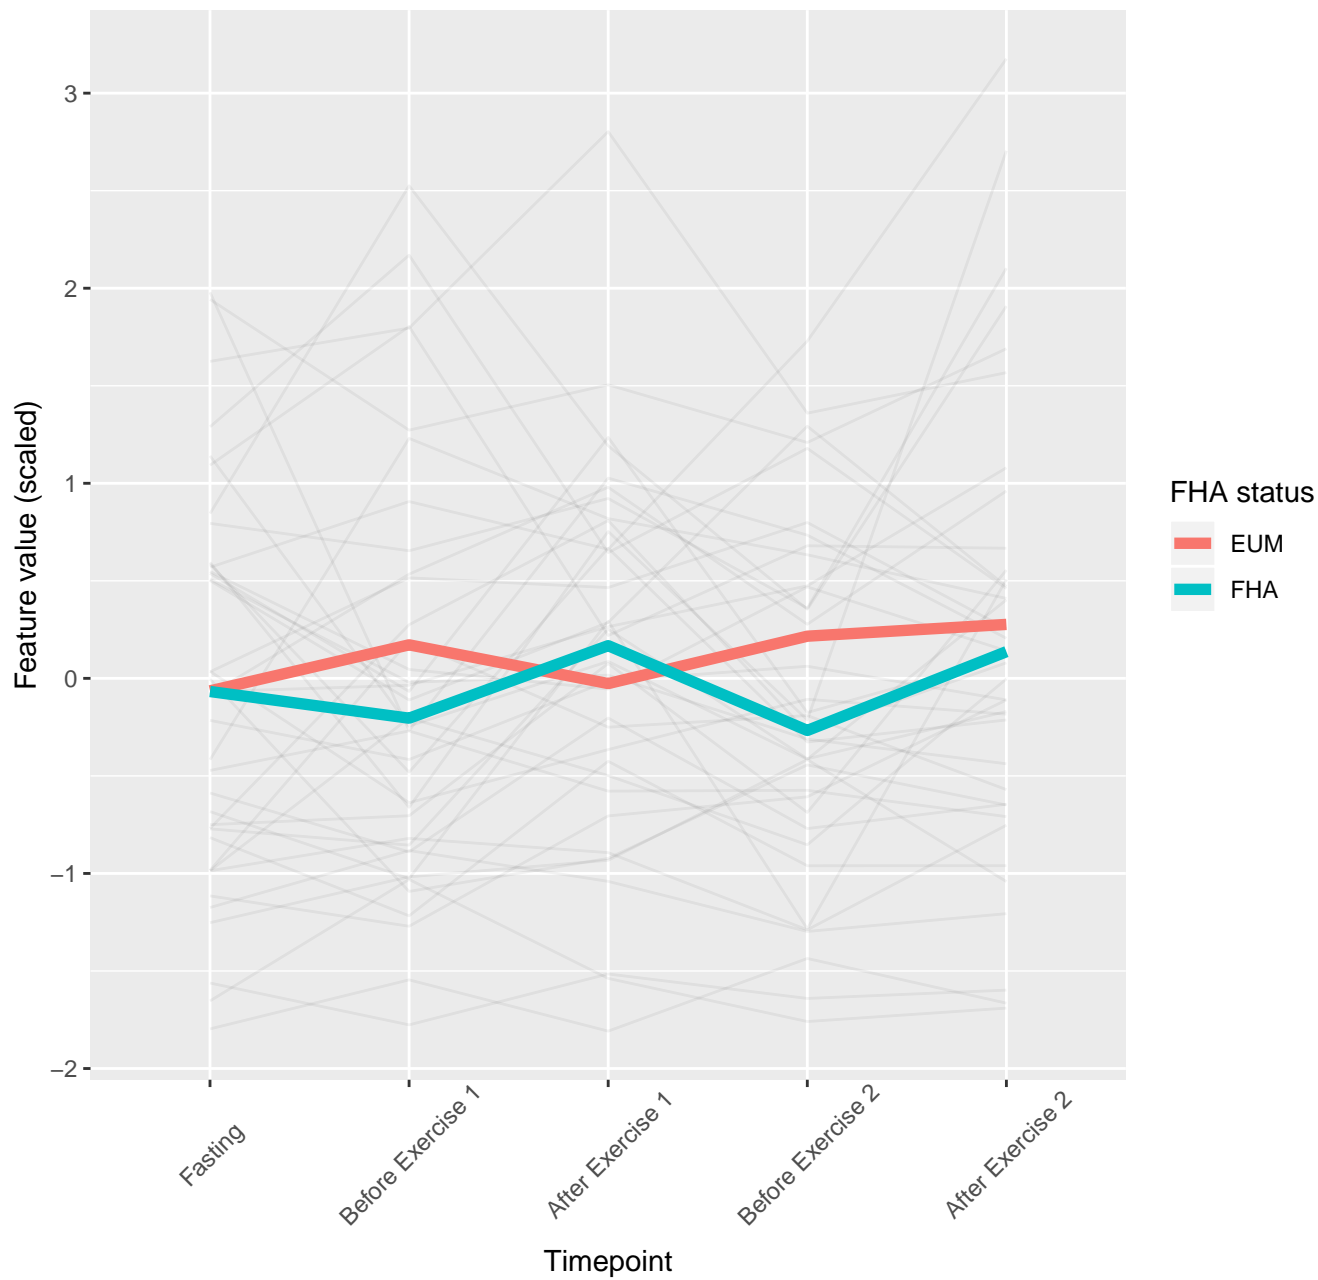

Line plot of PC(O-38:6)

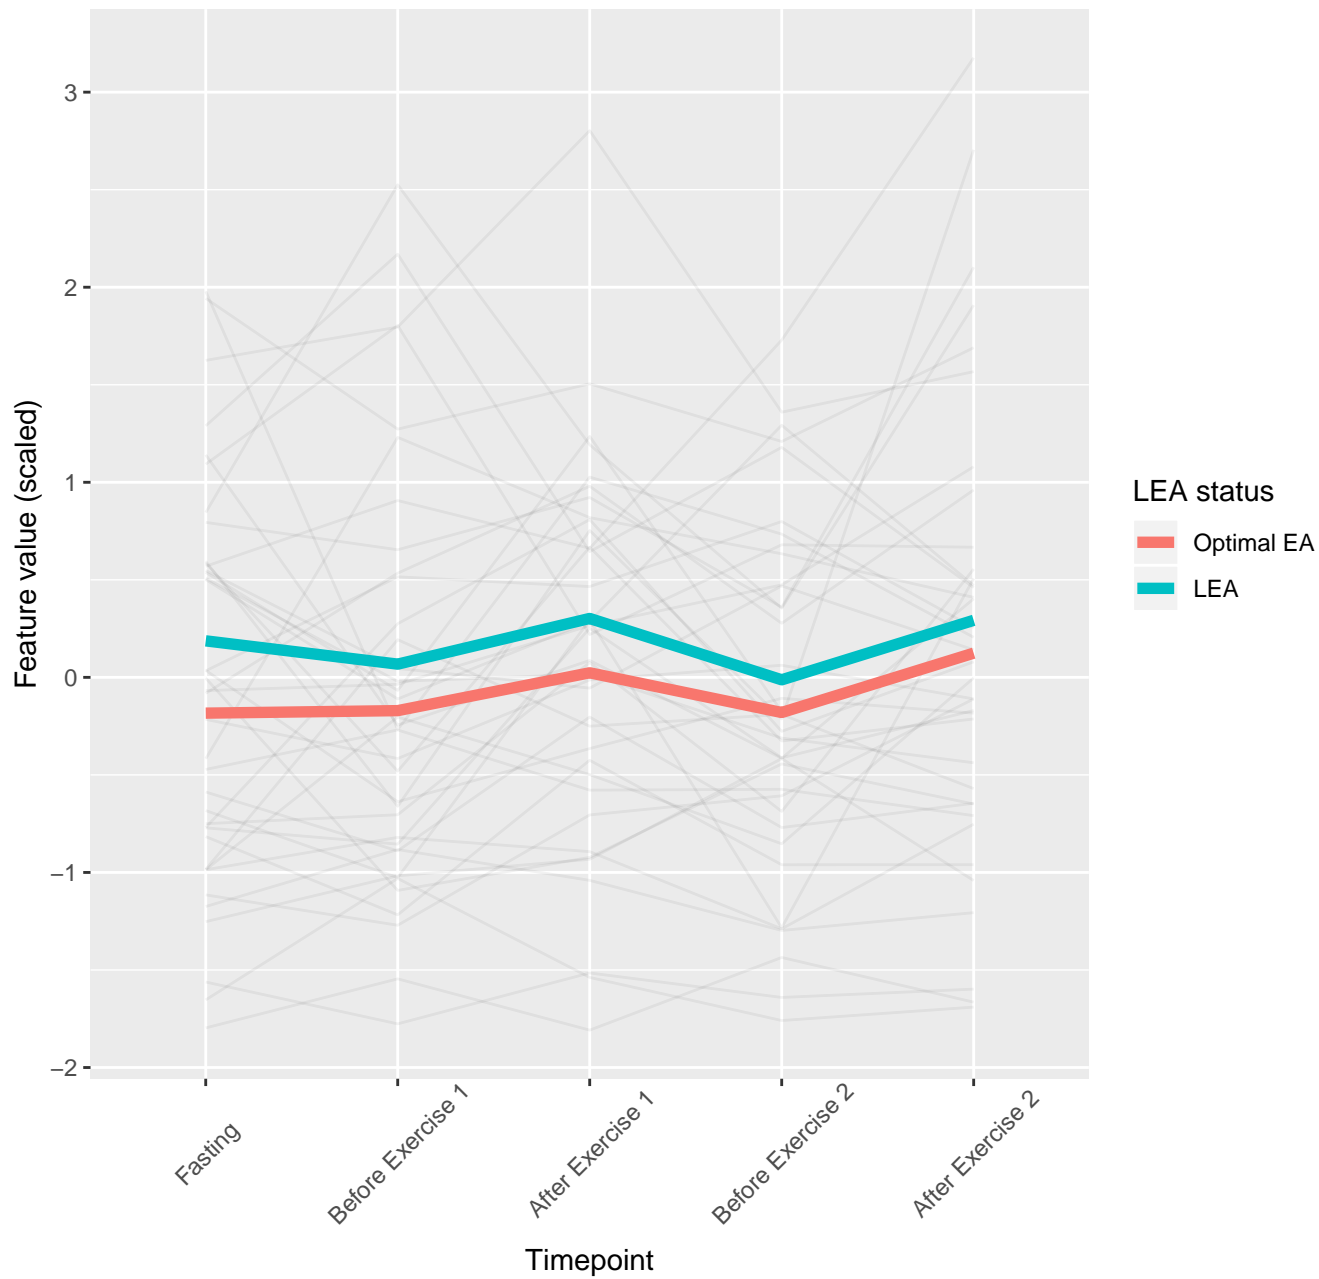

Line plot of PC(O-40:4)

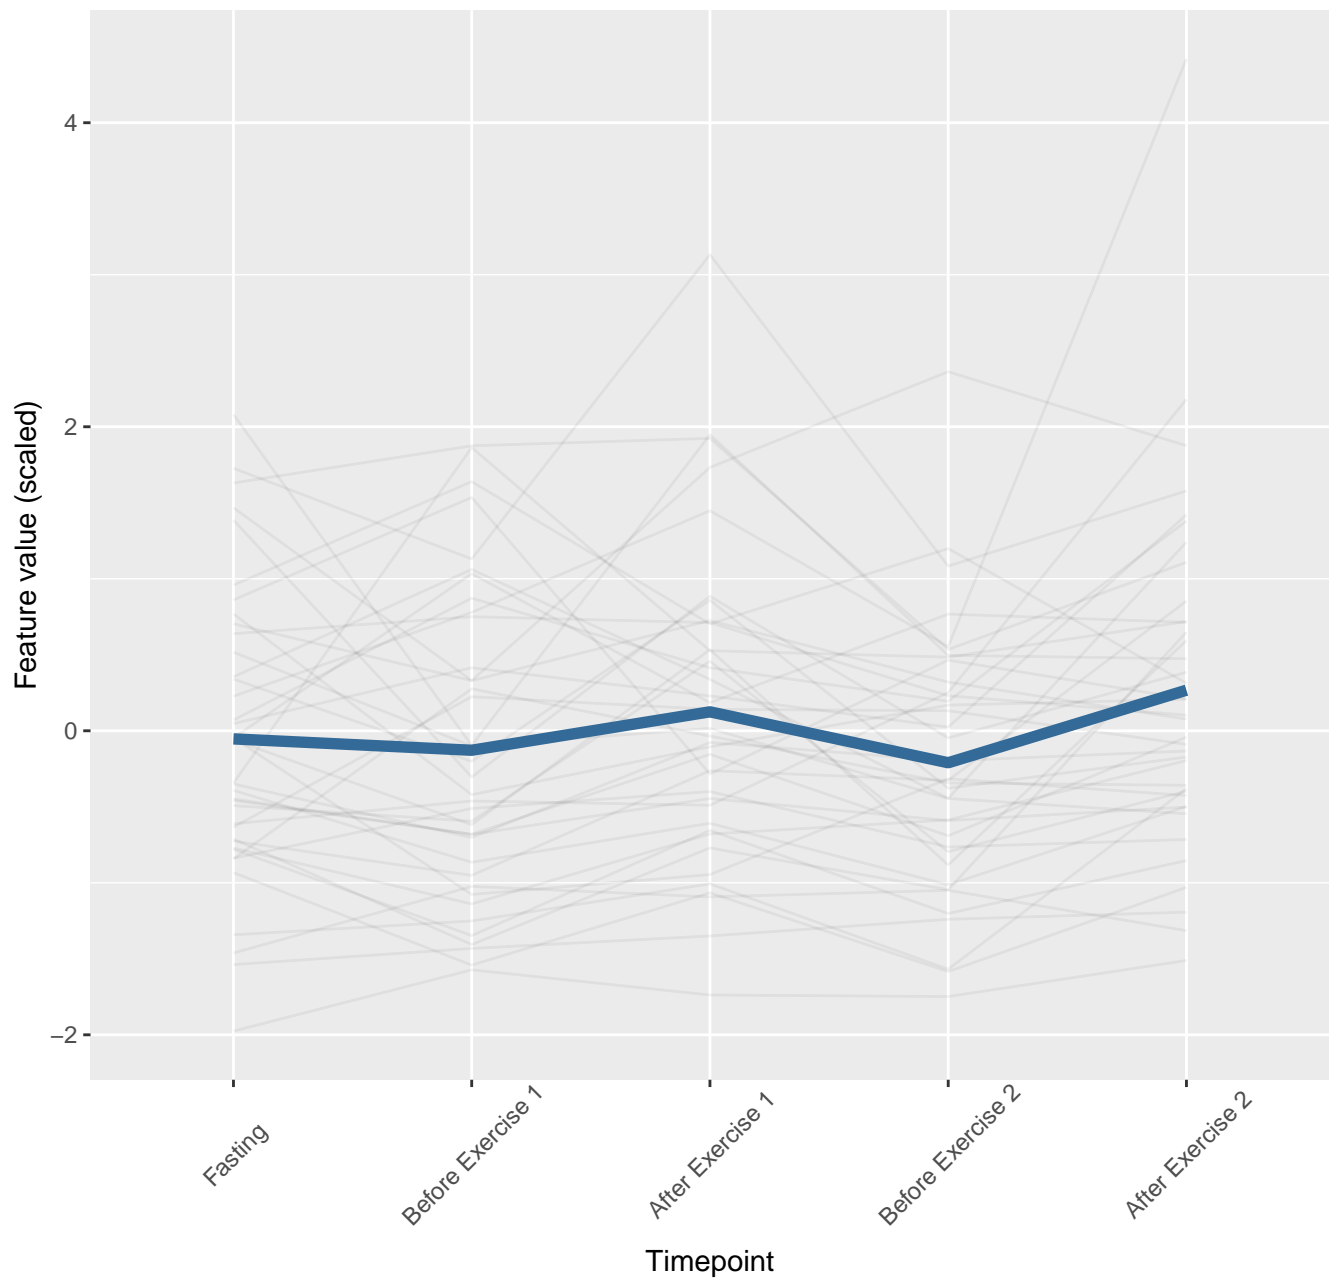

Line plot of PC(O-40:4)

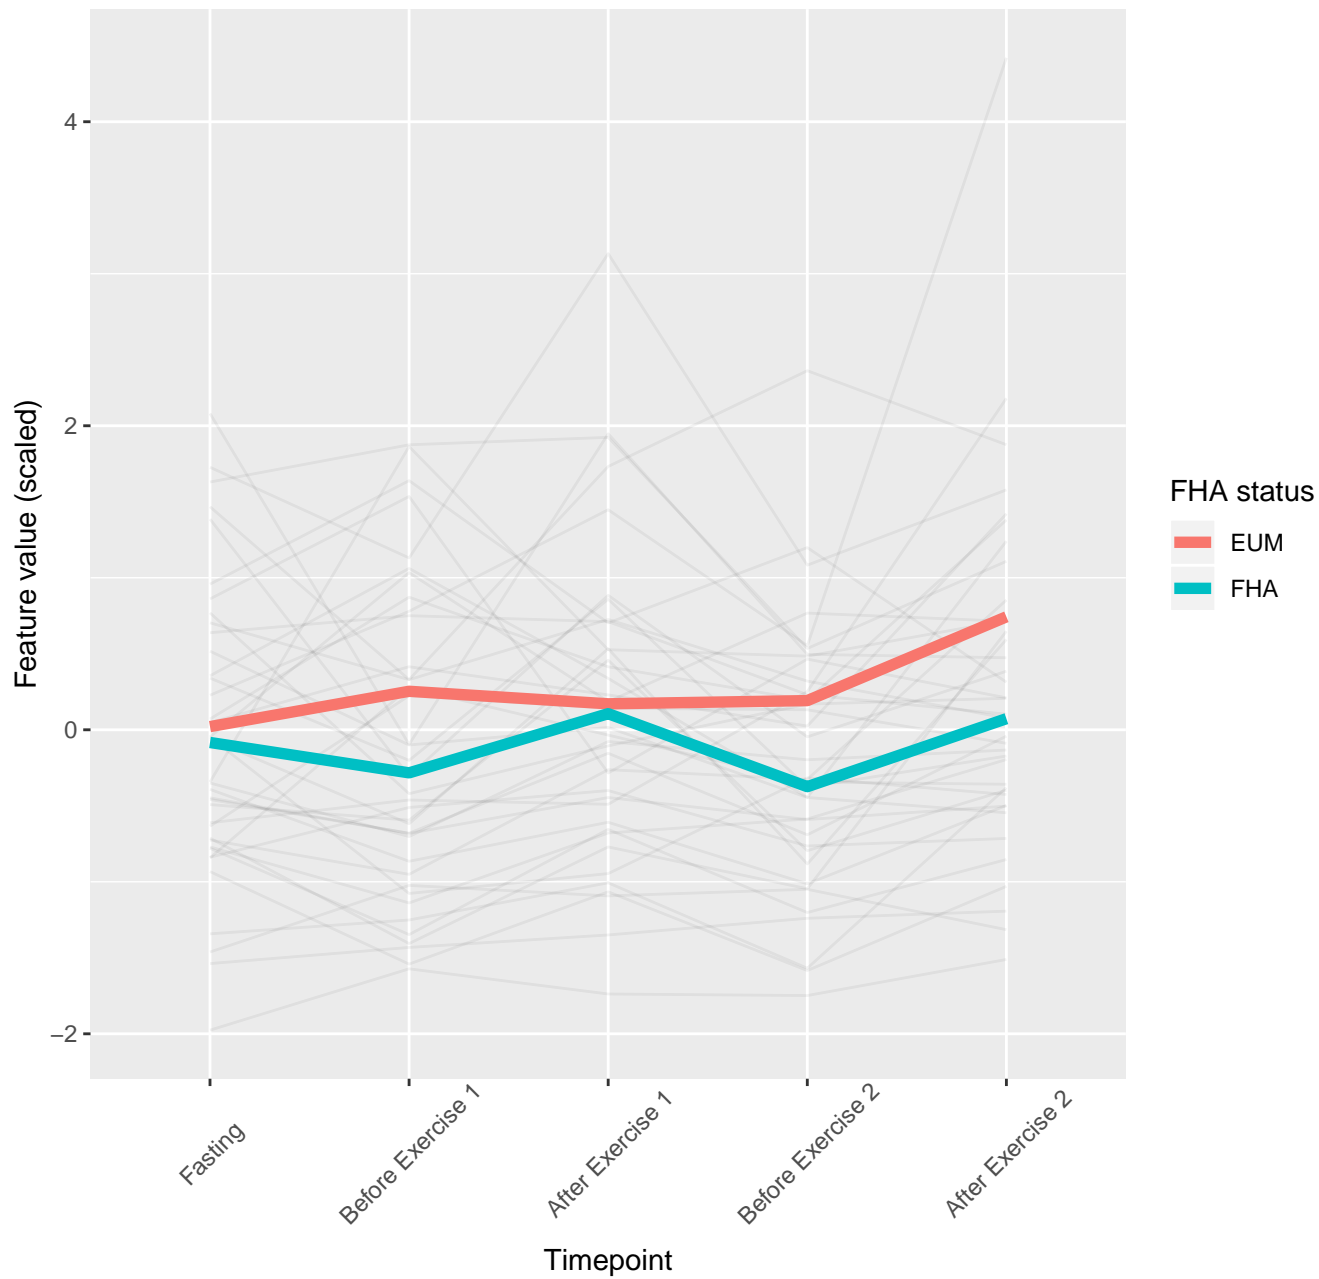



Line plot of PC(O-40:4)

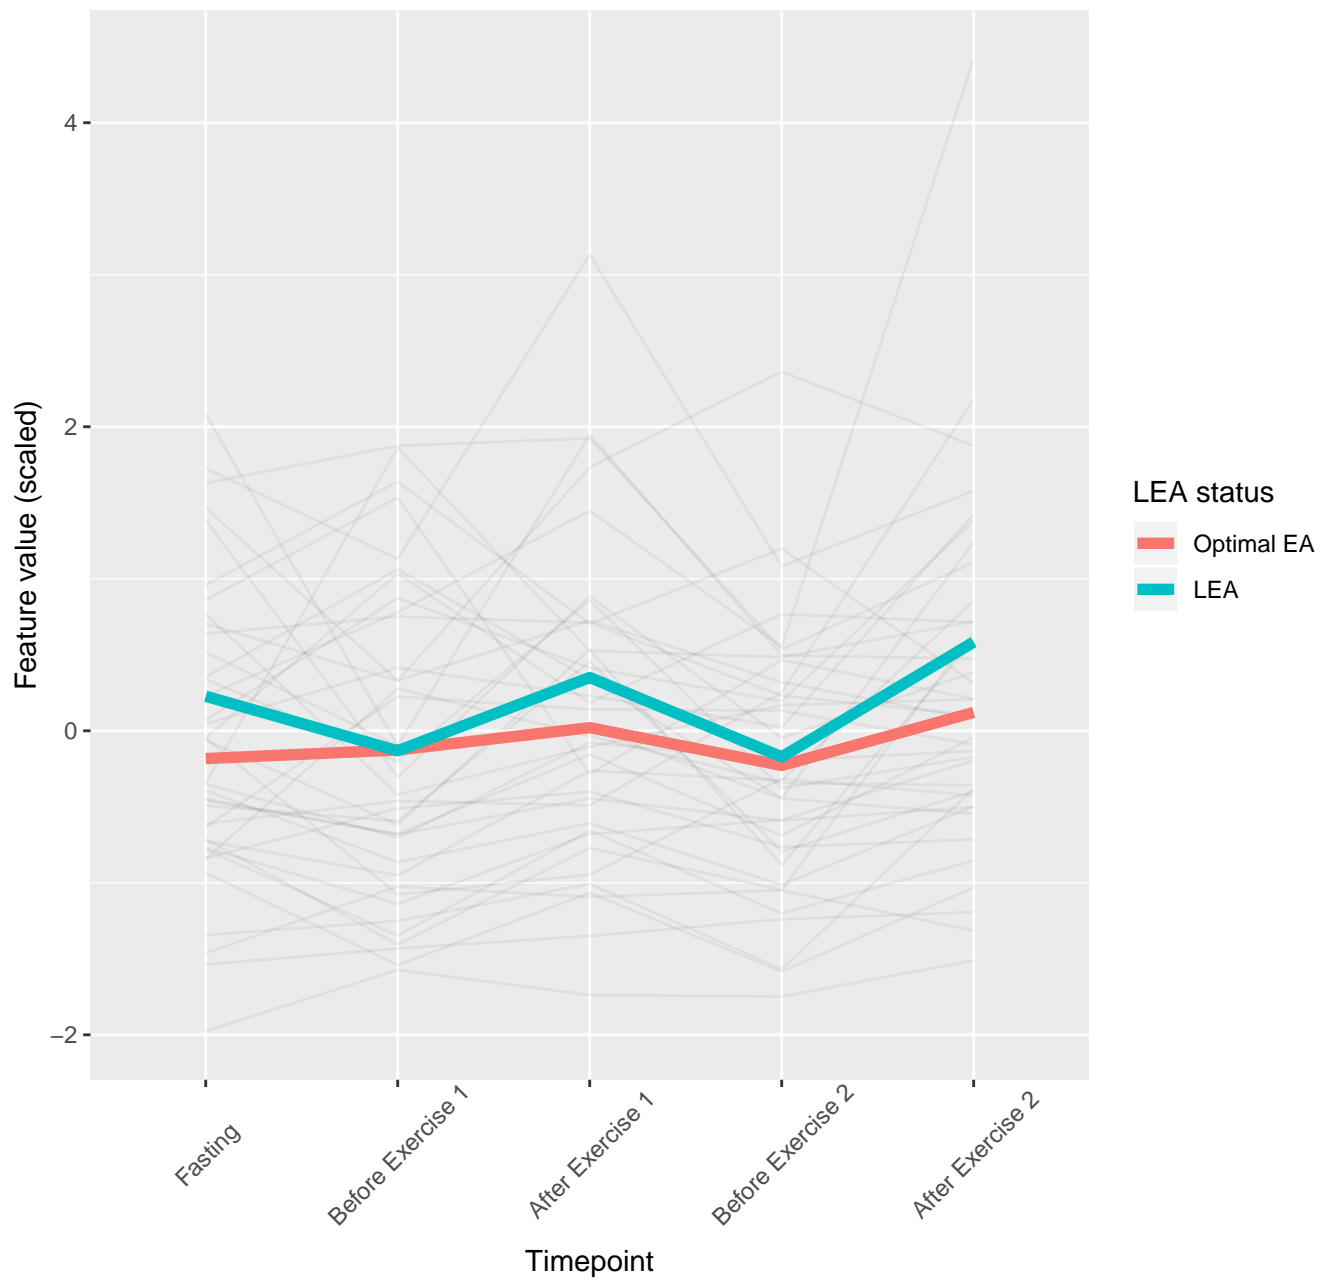

Line plot of PC(O-40:6)

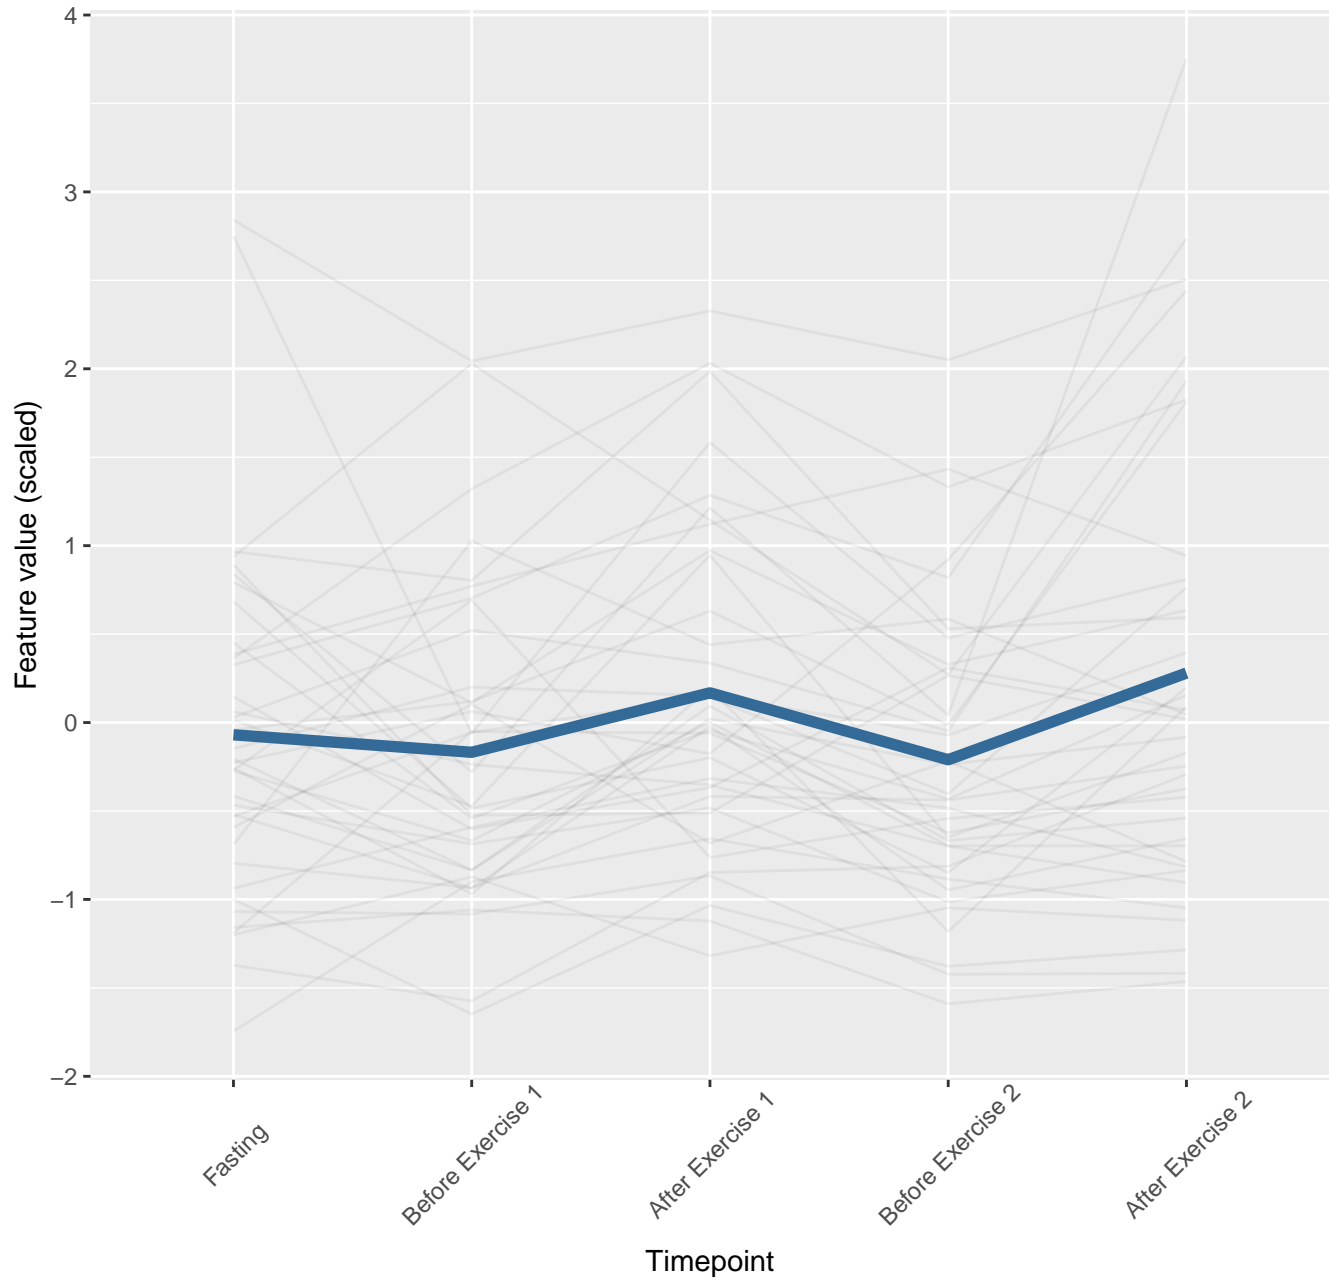

Line plot of PC(O-40:6)

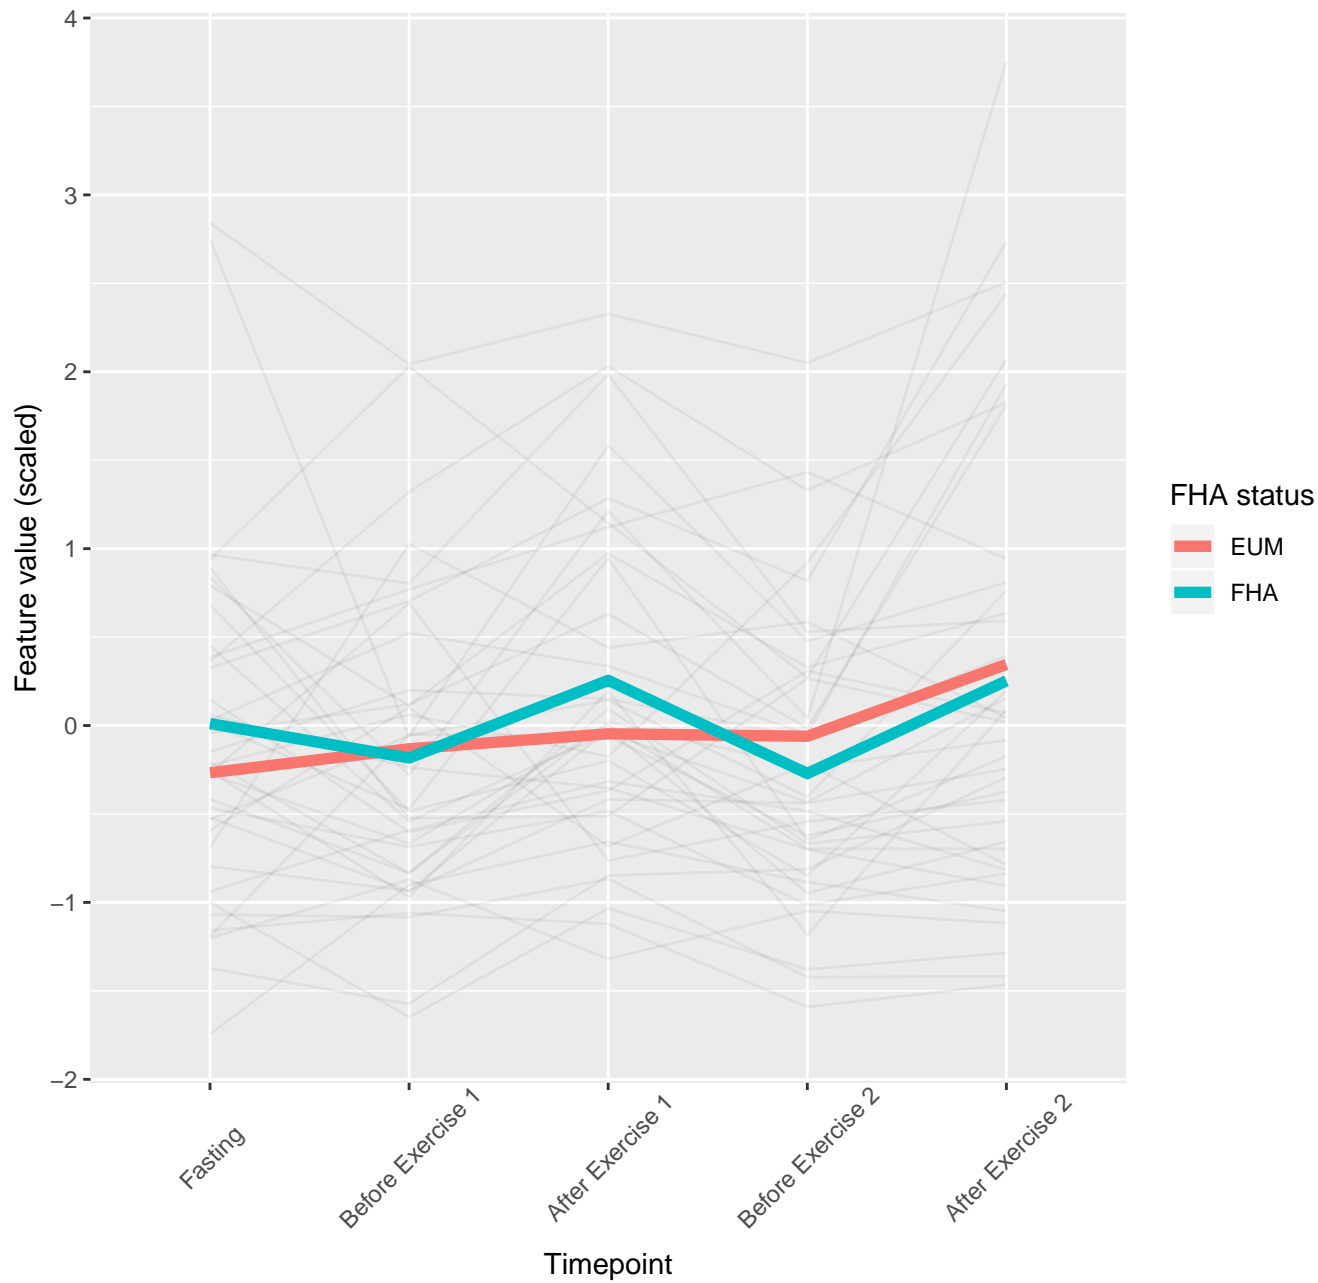

Line plot of PC(O-40:6)

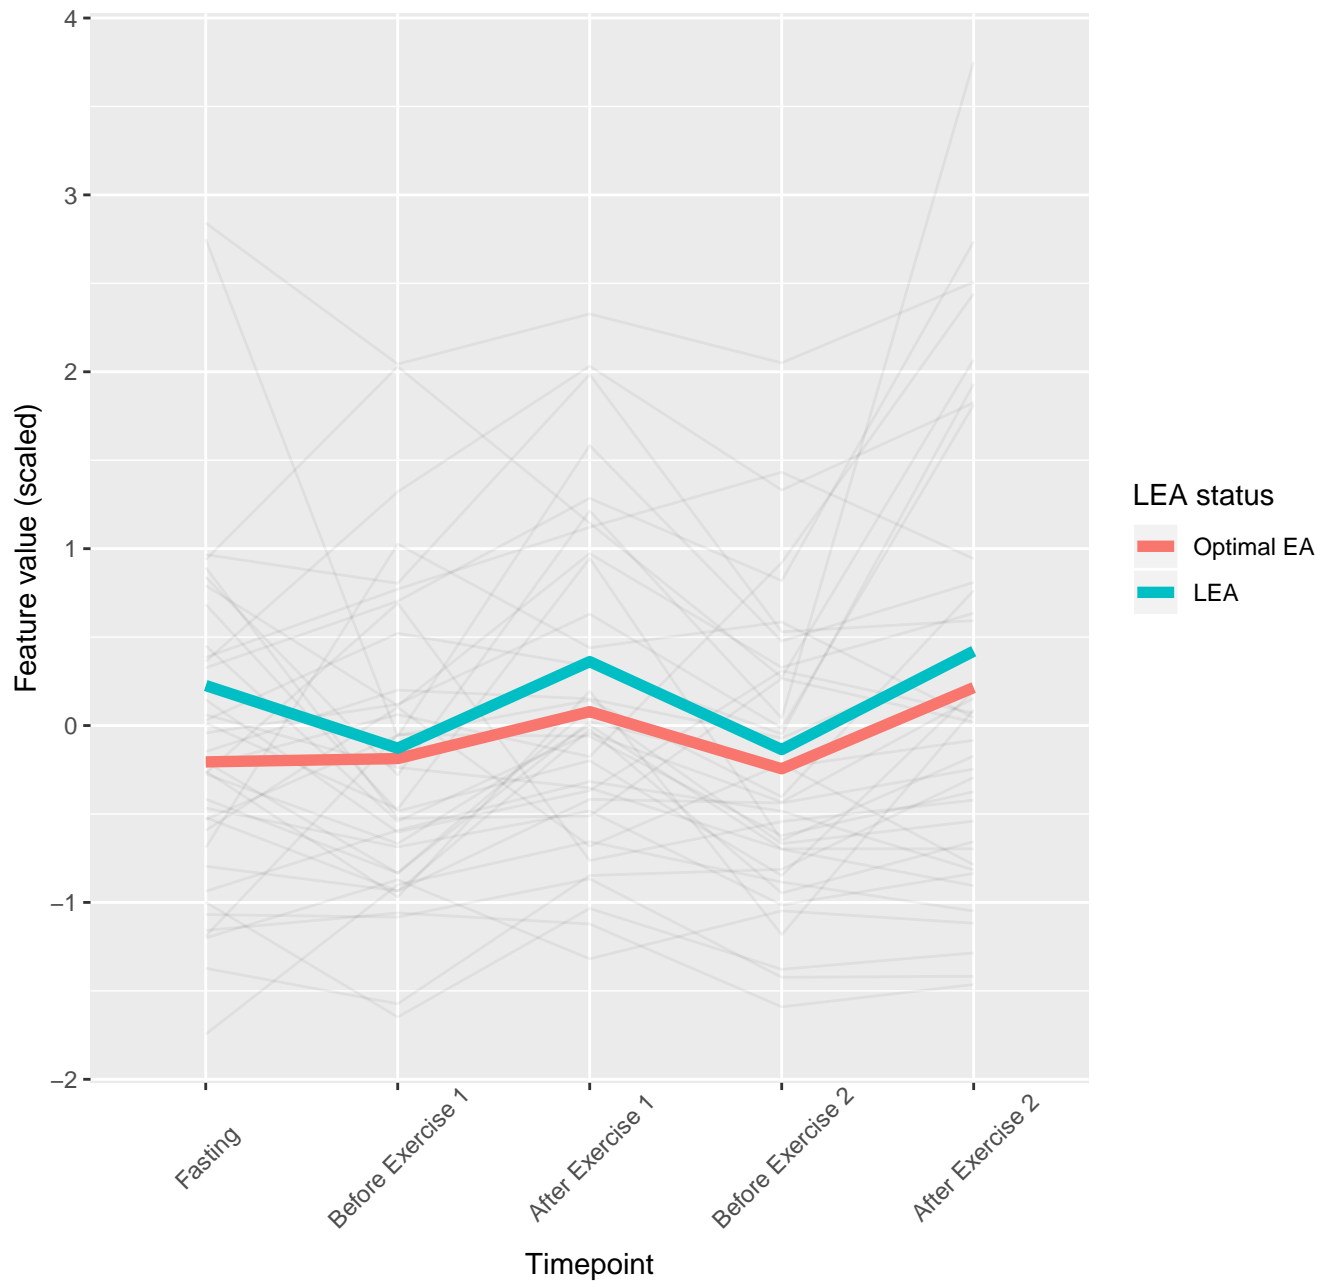

Line plot of PC(O-42:3)

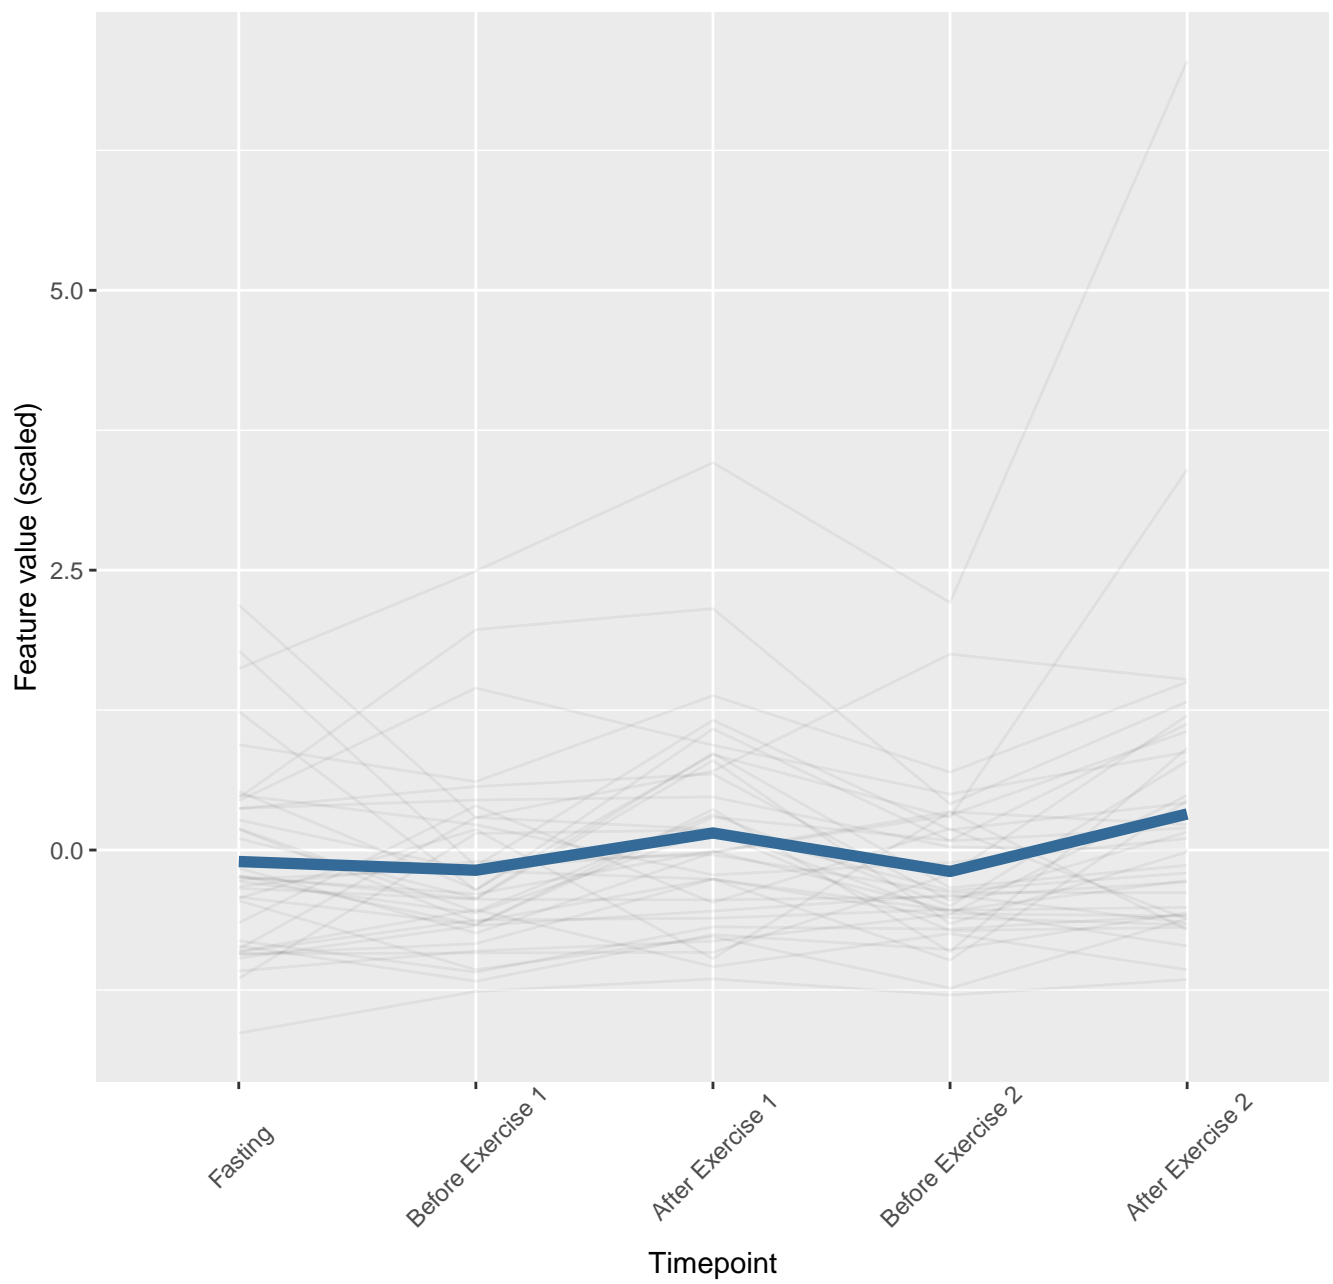

Line plot of PC(O-42:3)

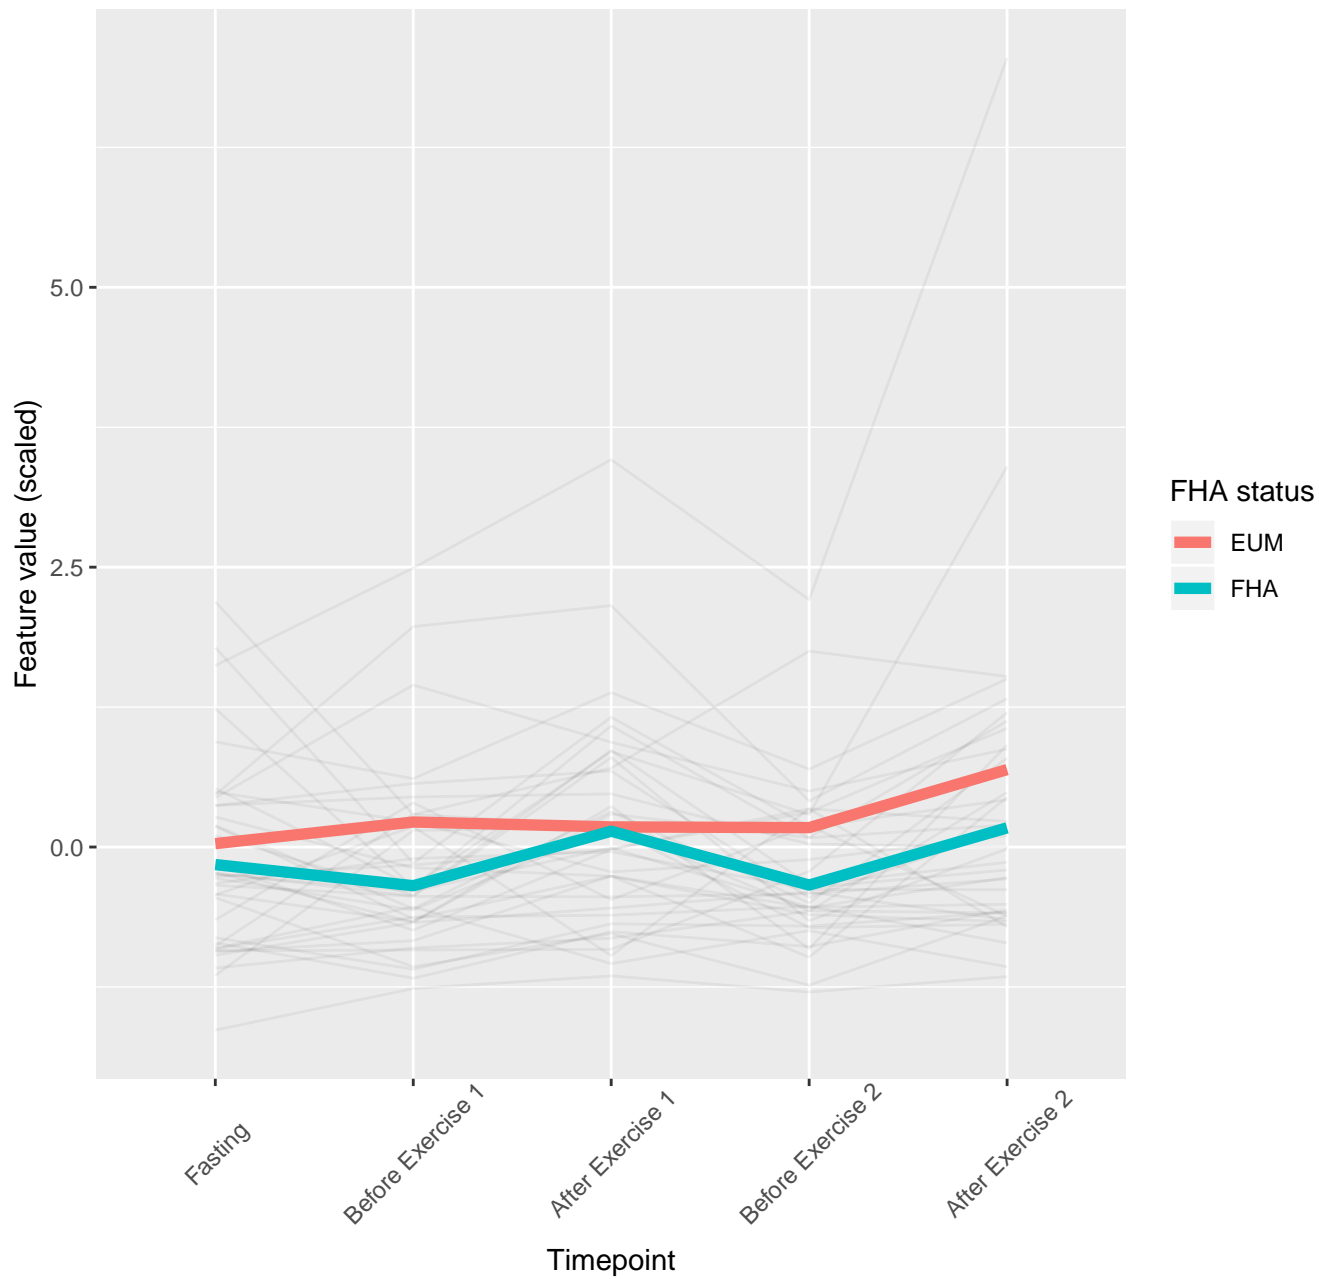

Line plot of PC(O-42:3)

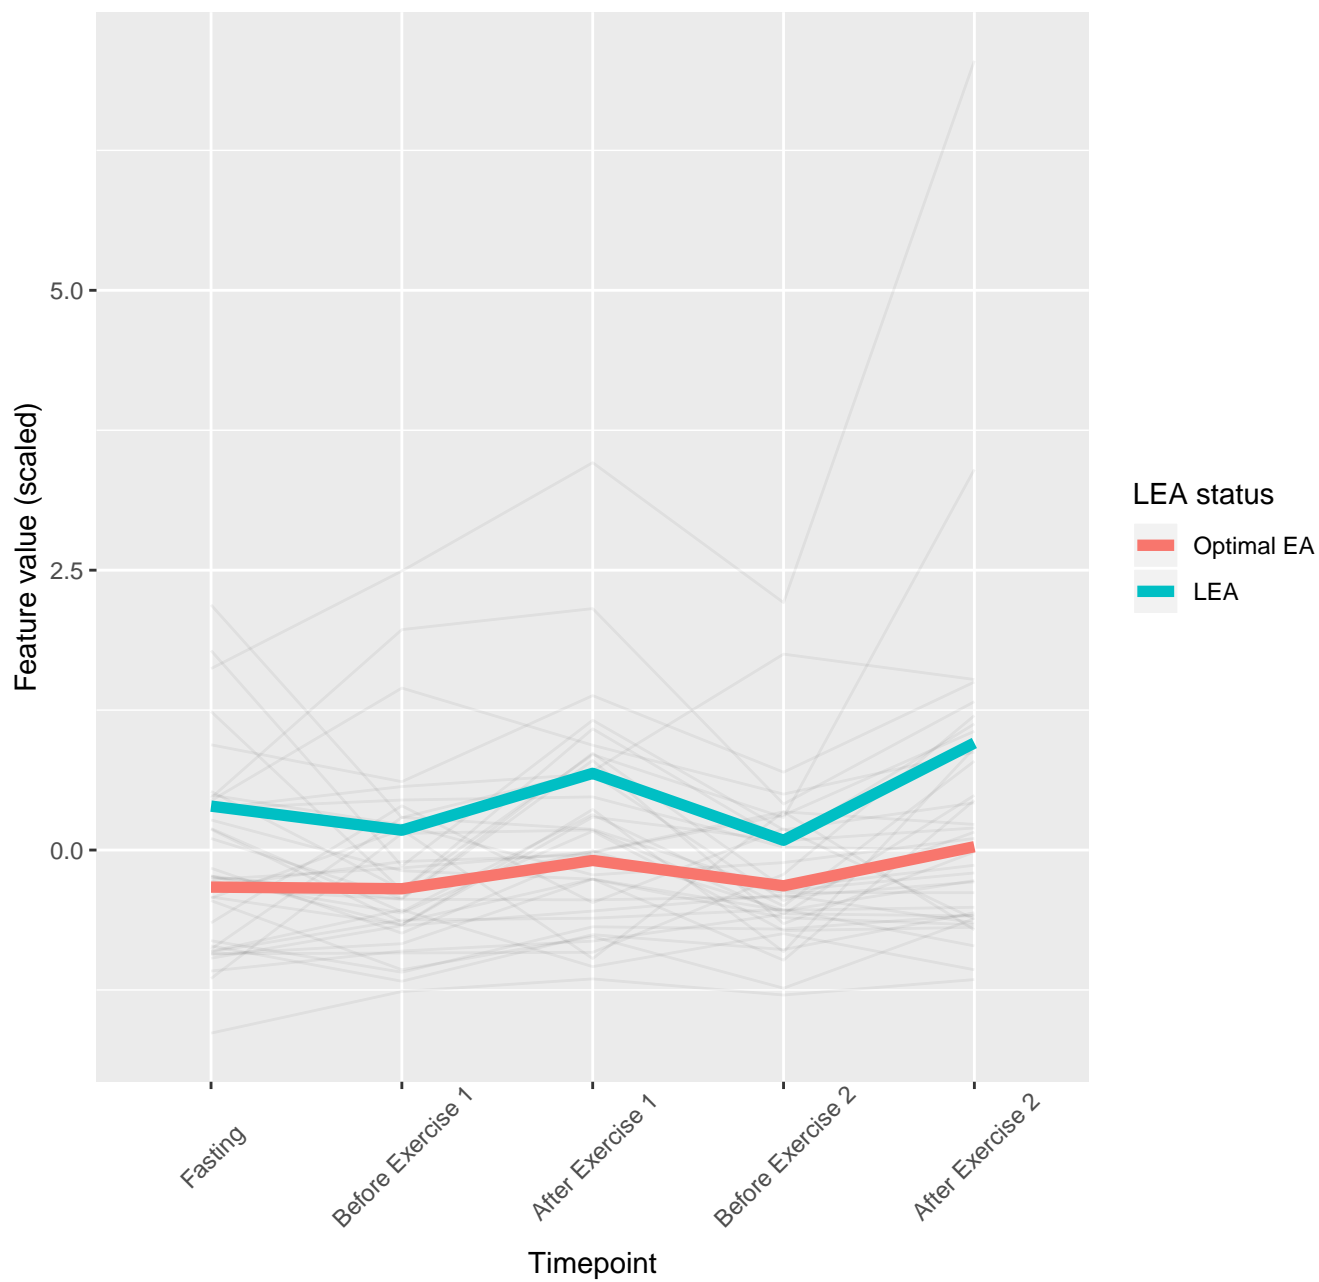

Line plot of PC(P-18:0/22:6)

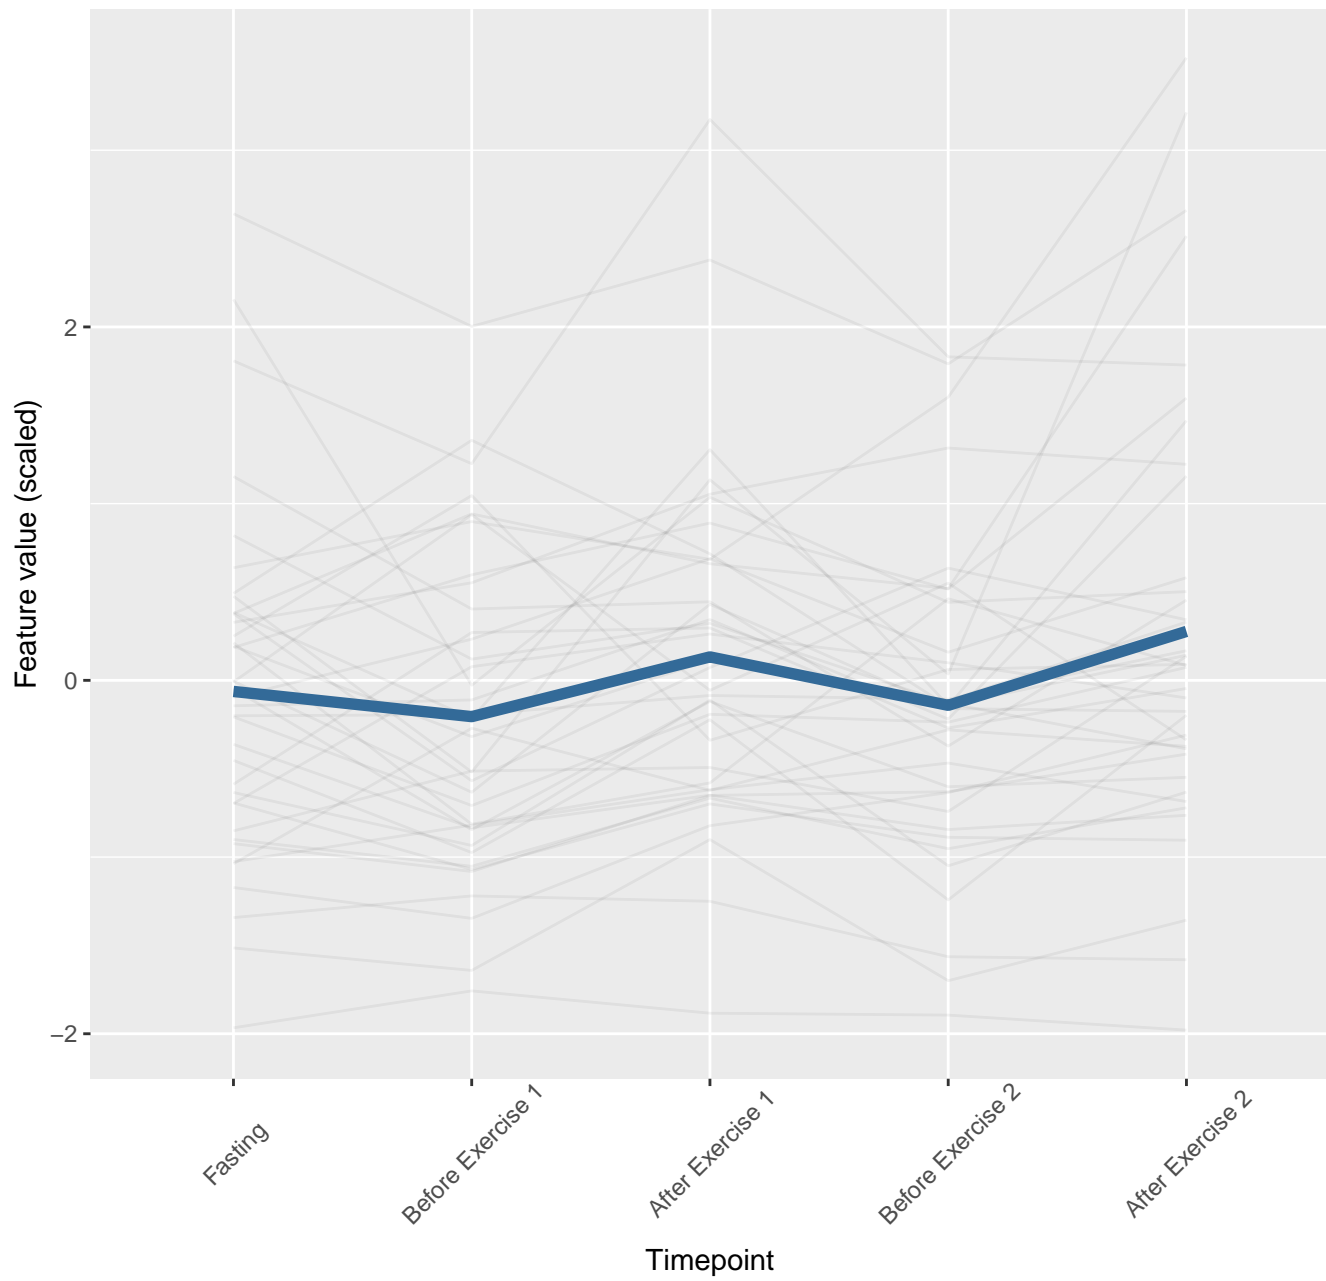



Line plot of PC(P-18:0/22:6)

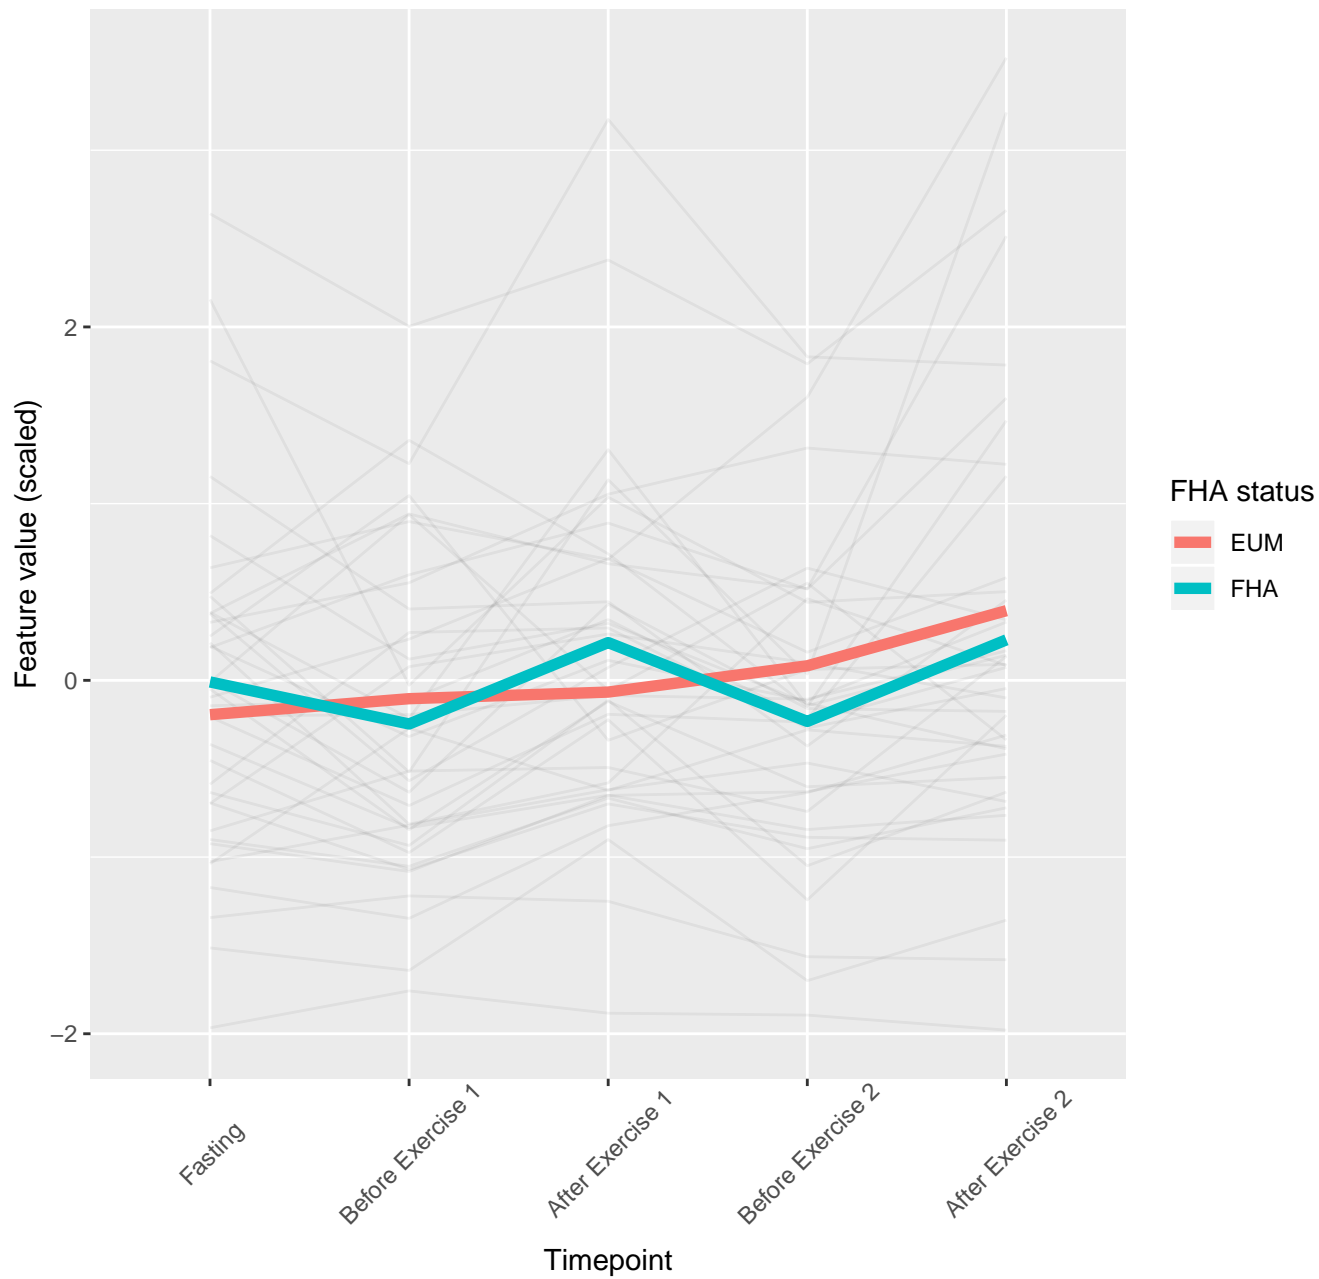

Line plot of PC(P-18:0/22:6)

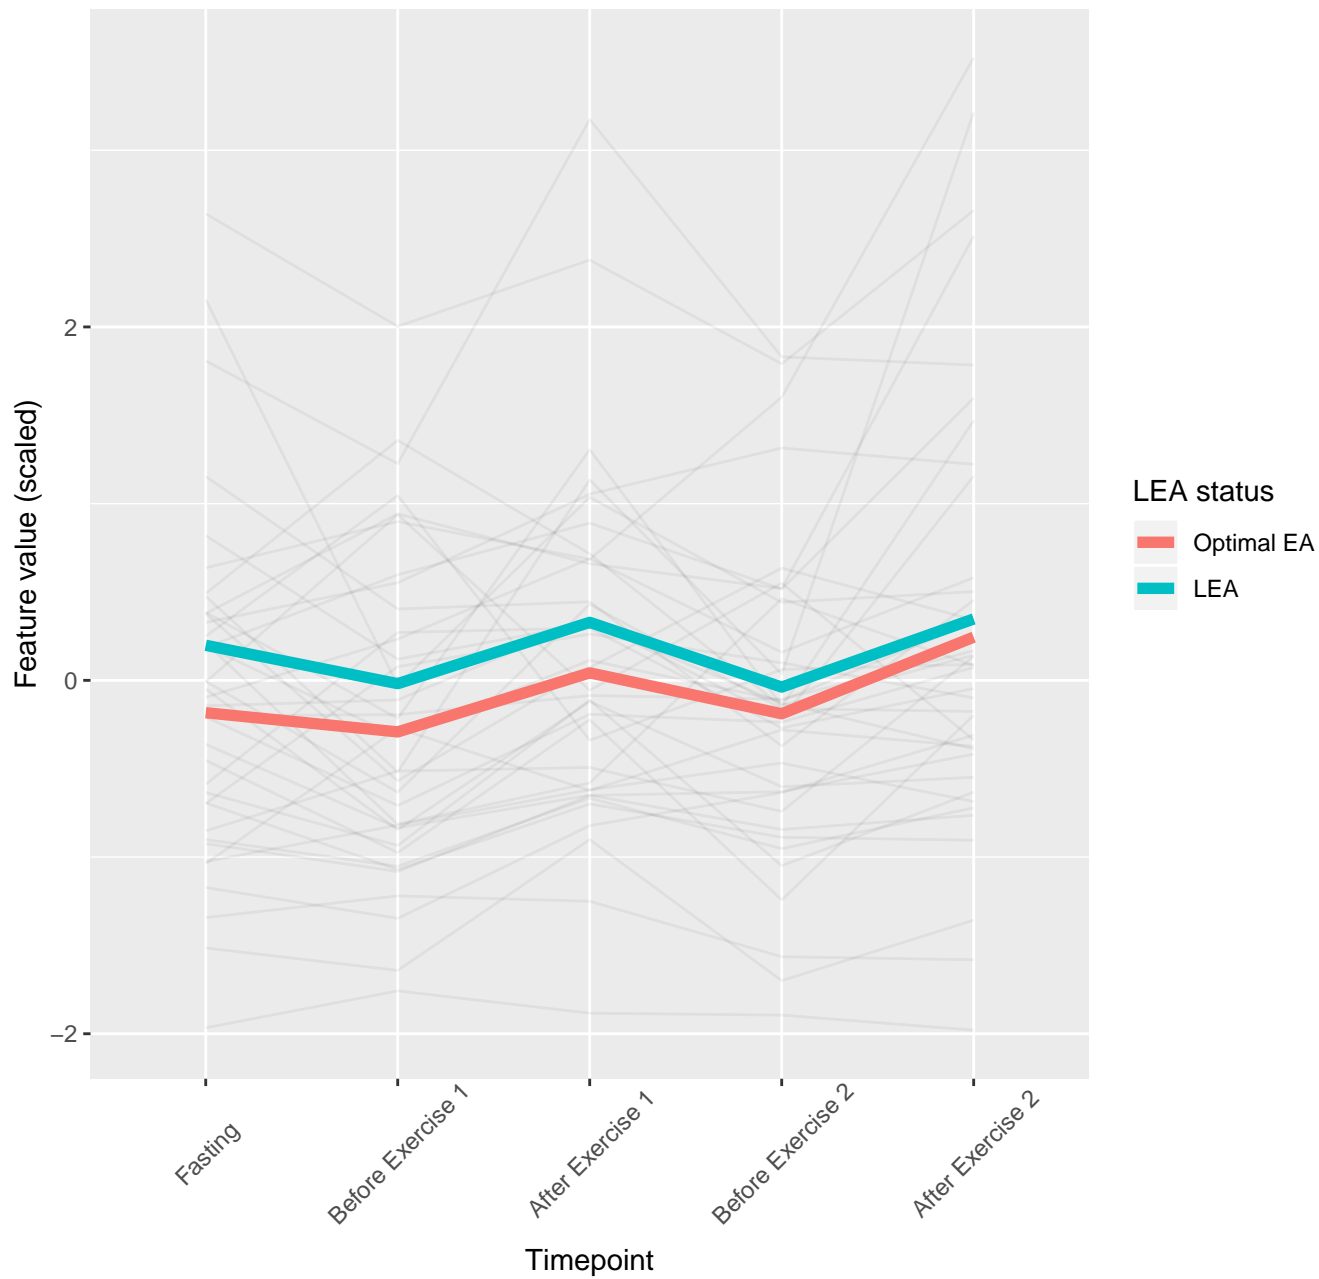

Line plot of PC(P-20:0/22:4)

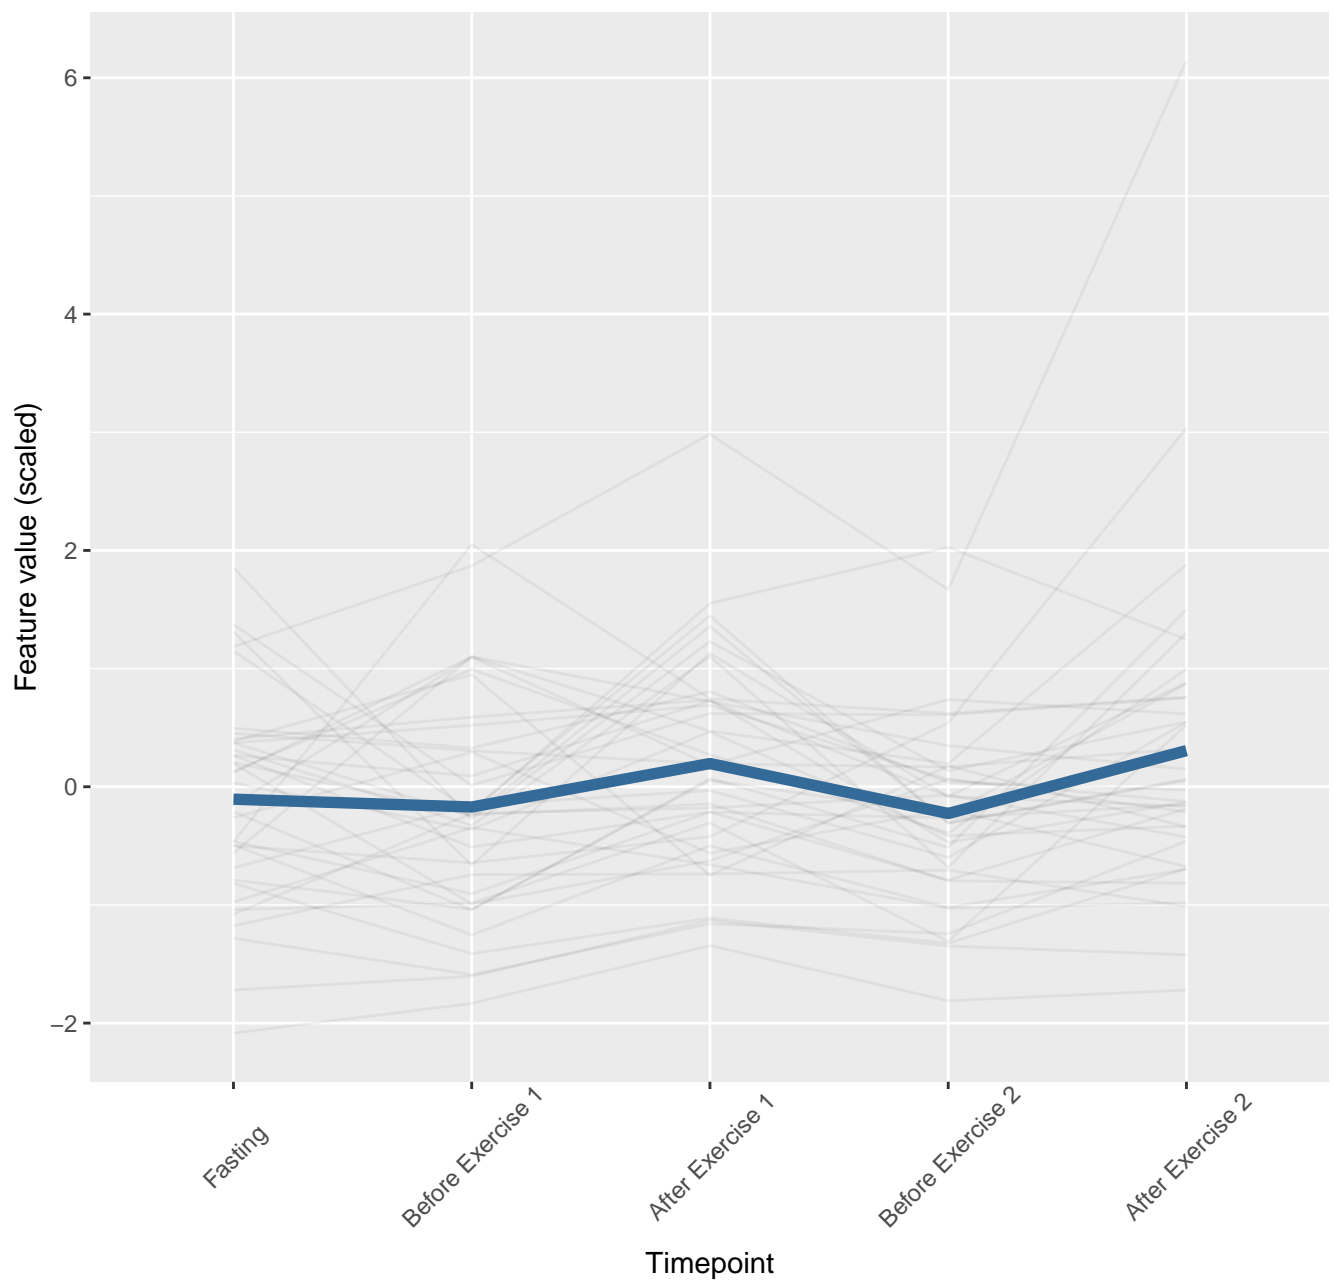

Line plot of PC(P-20:0/22:4)

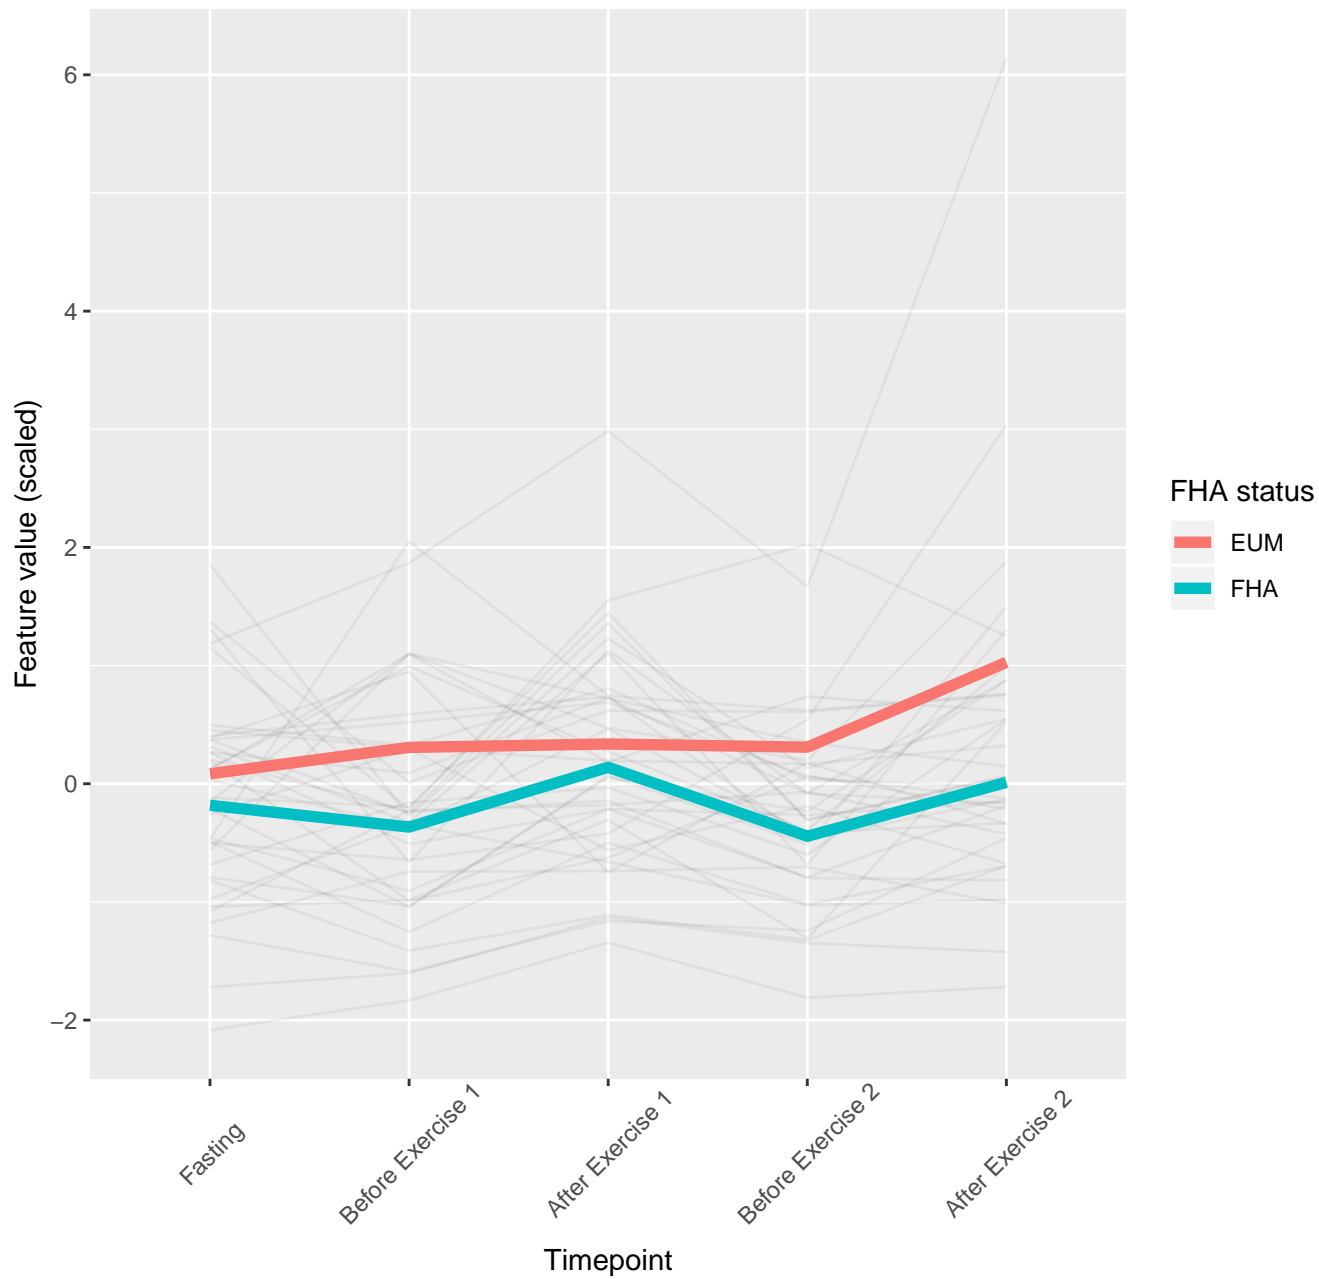

Line plot of PC(P-20:0/22:4)

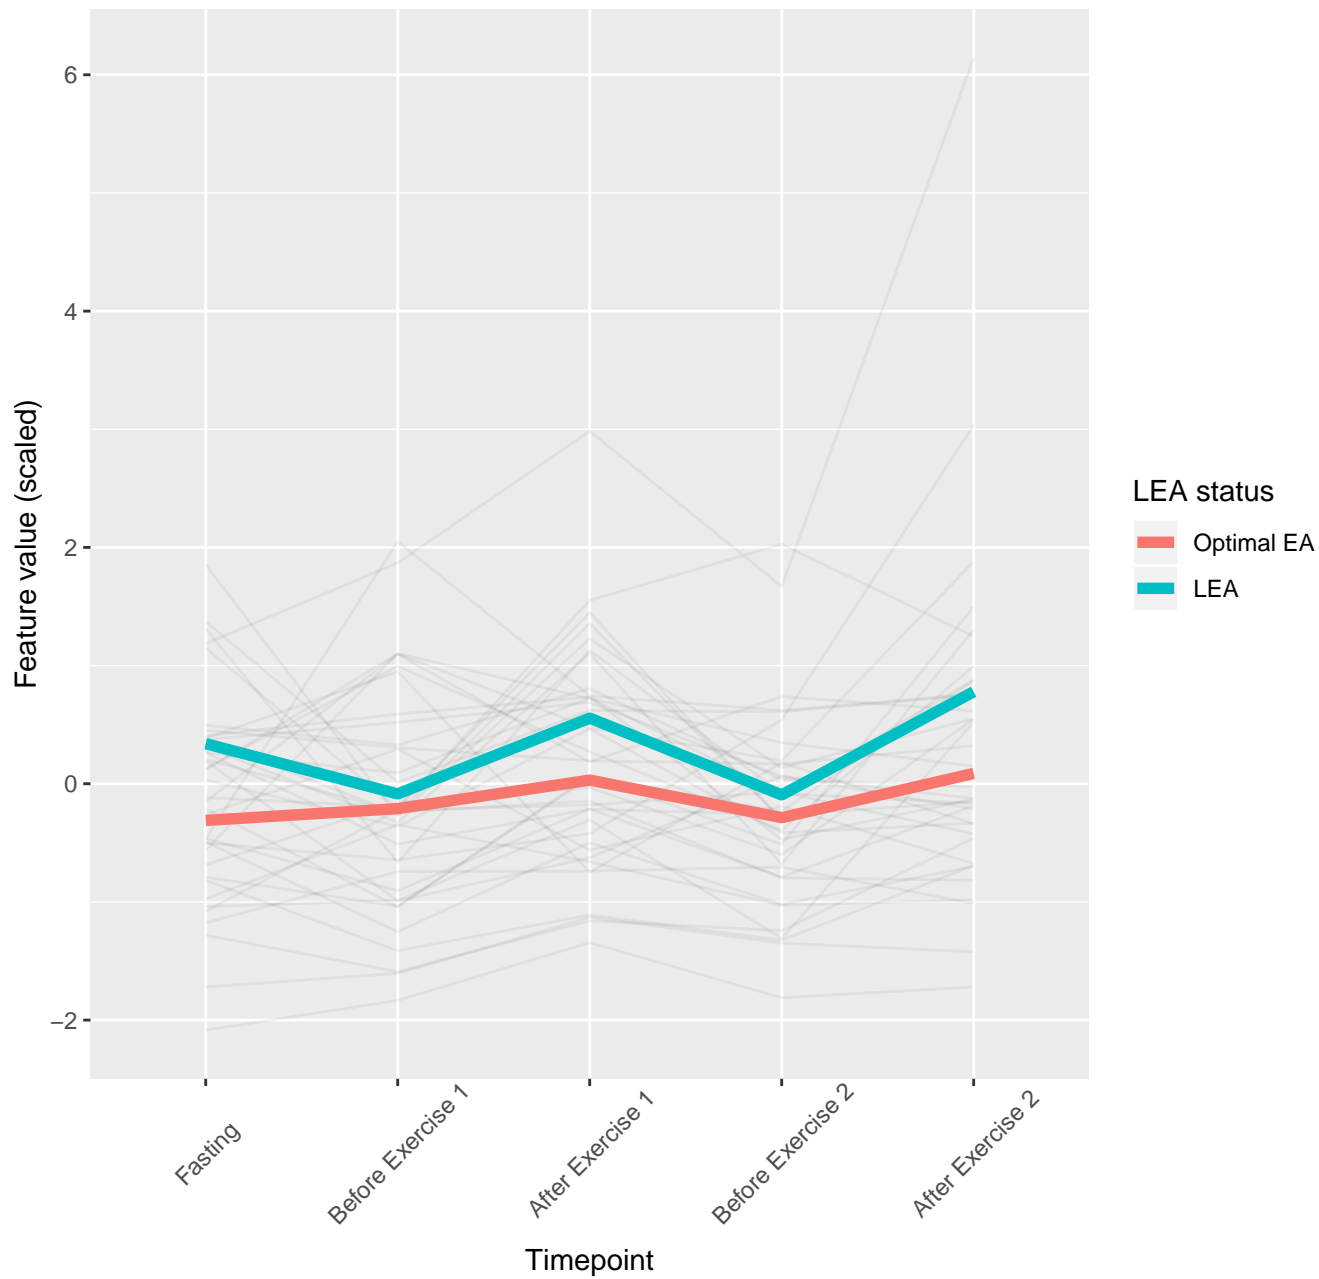

Line plot of PE(34:2)

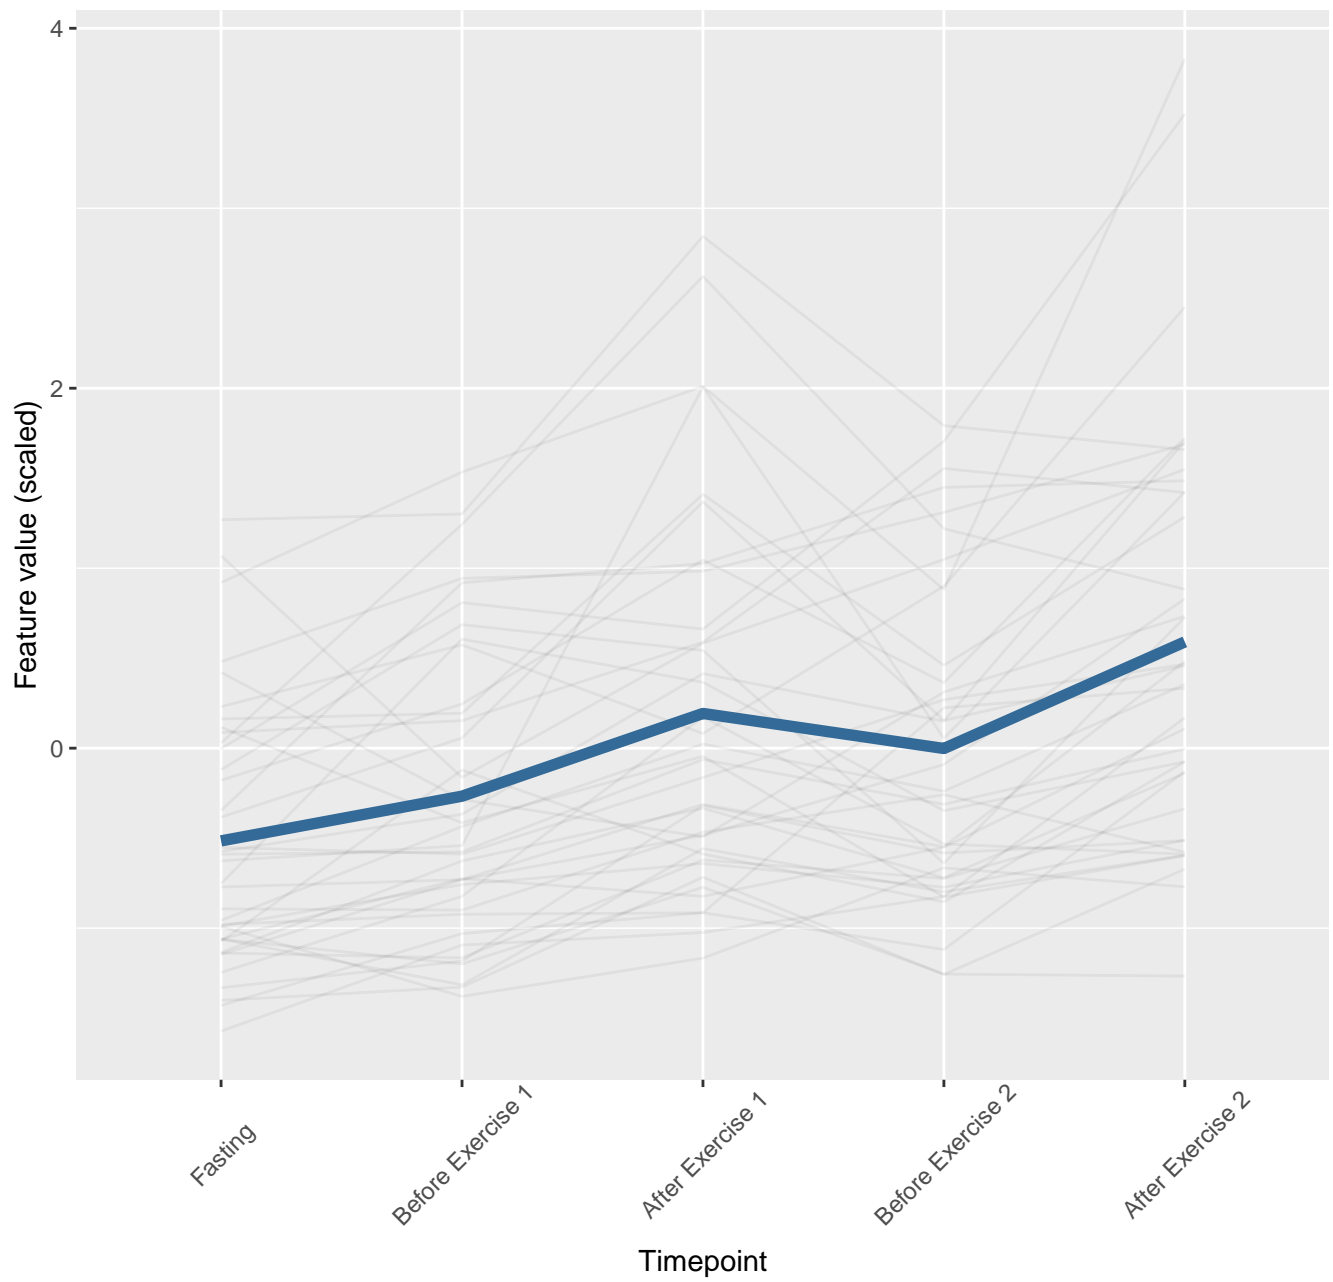

Line plot of PE(34:2)

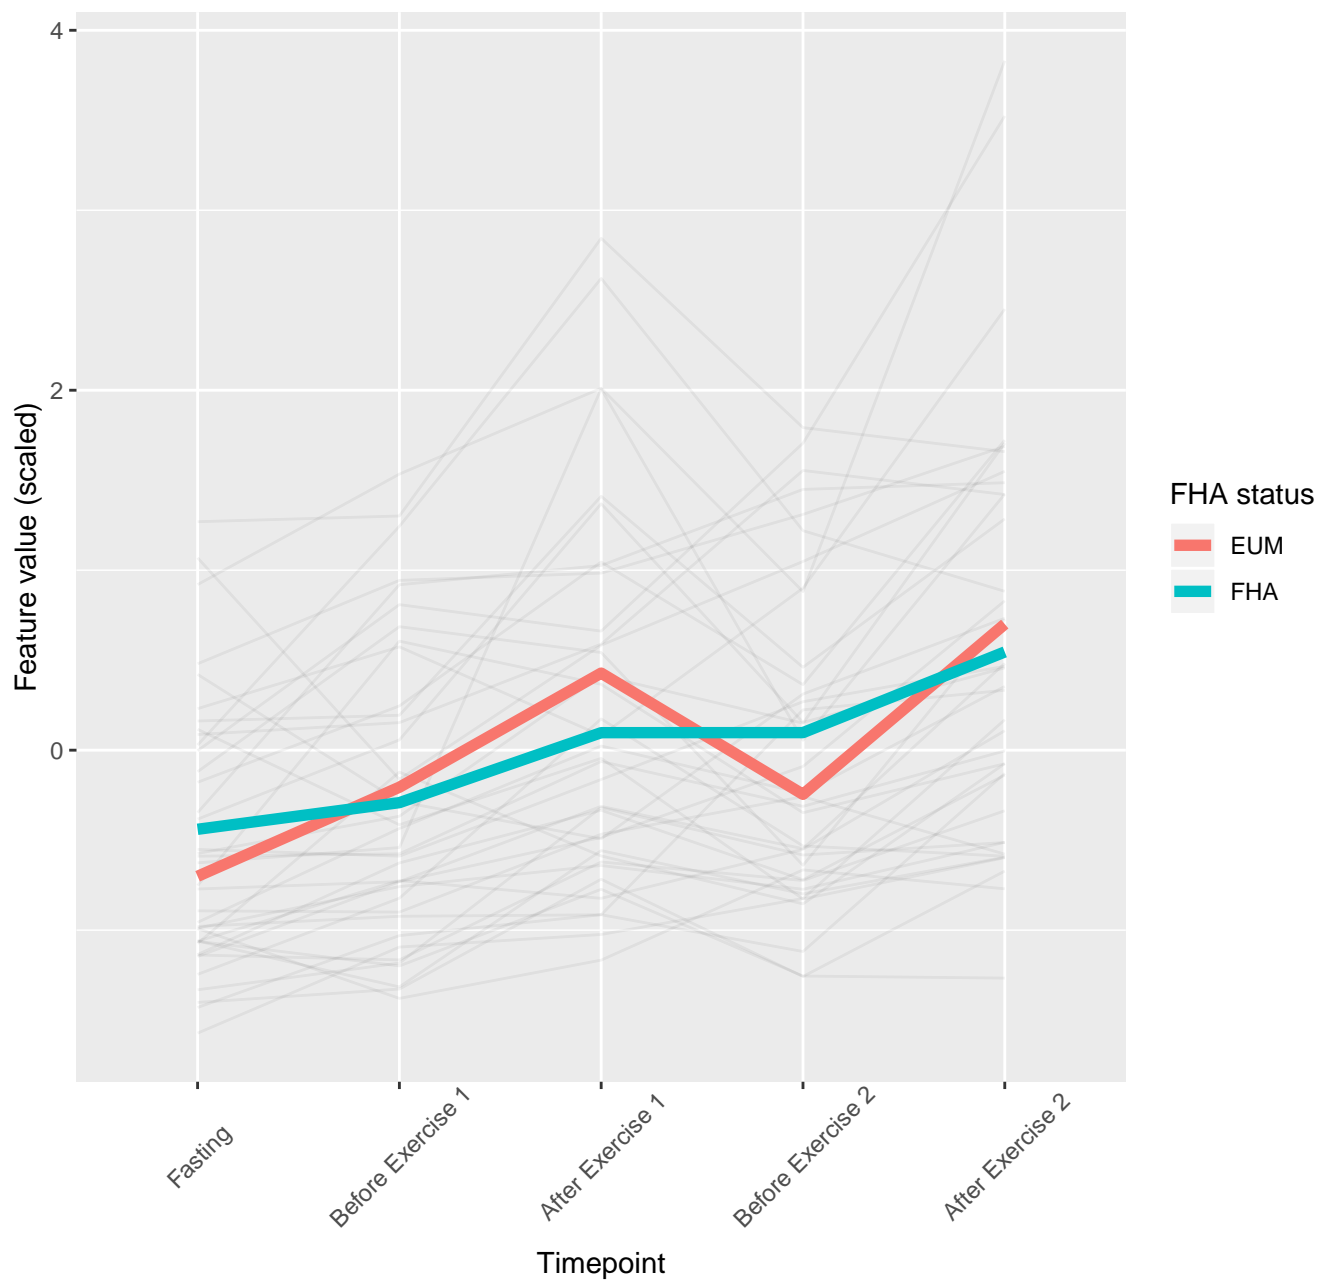

Line plot of PE(34:2)

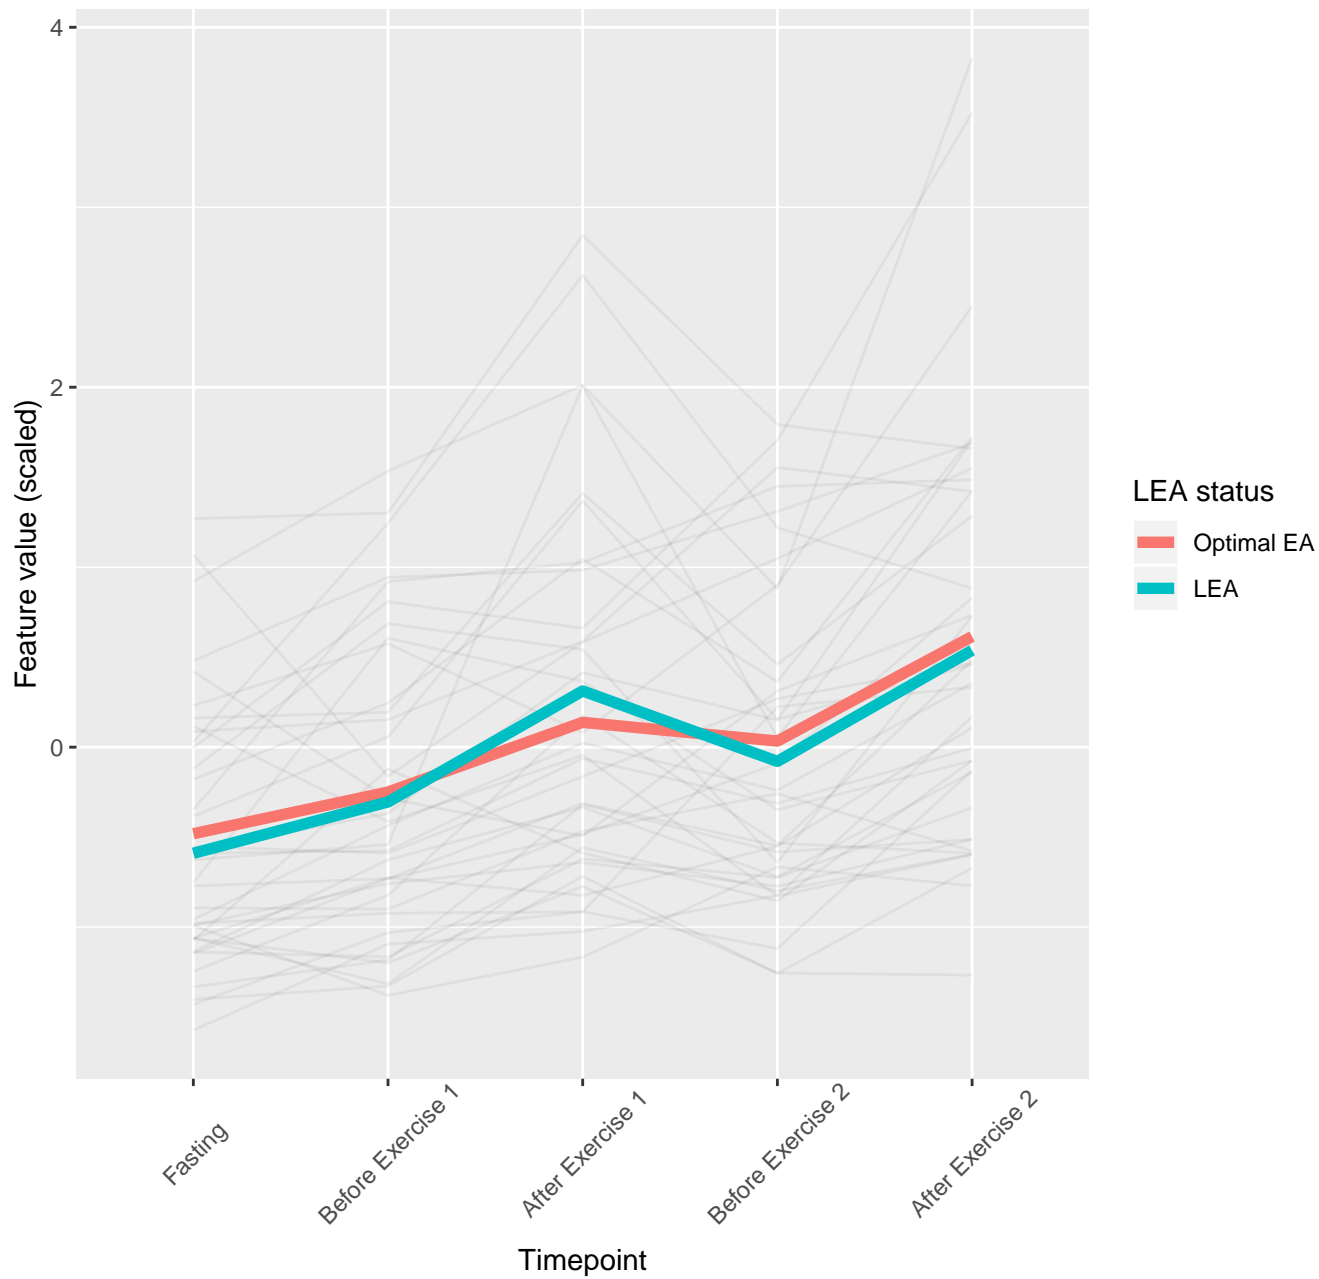



Line plot of PE(36:4)

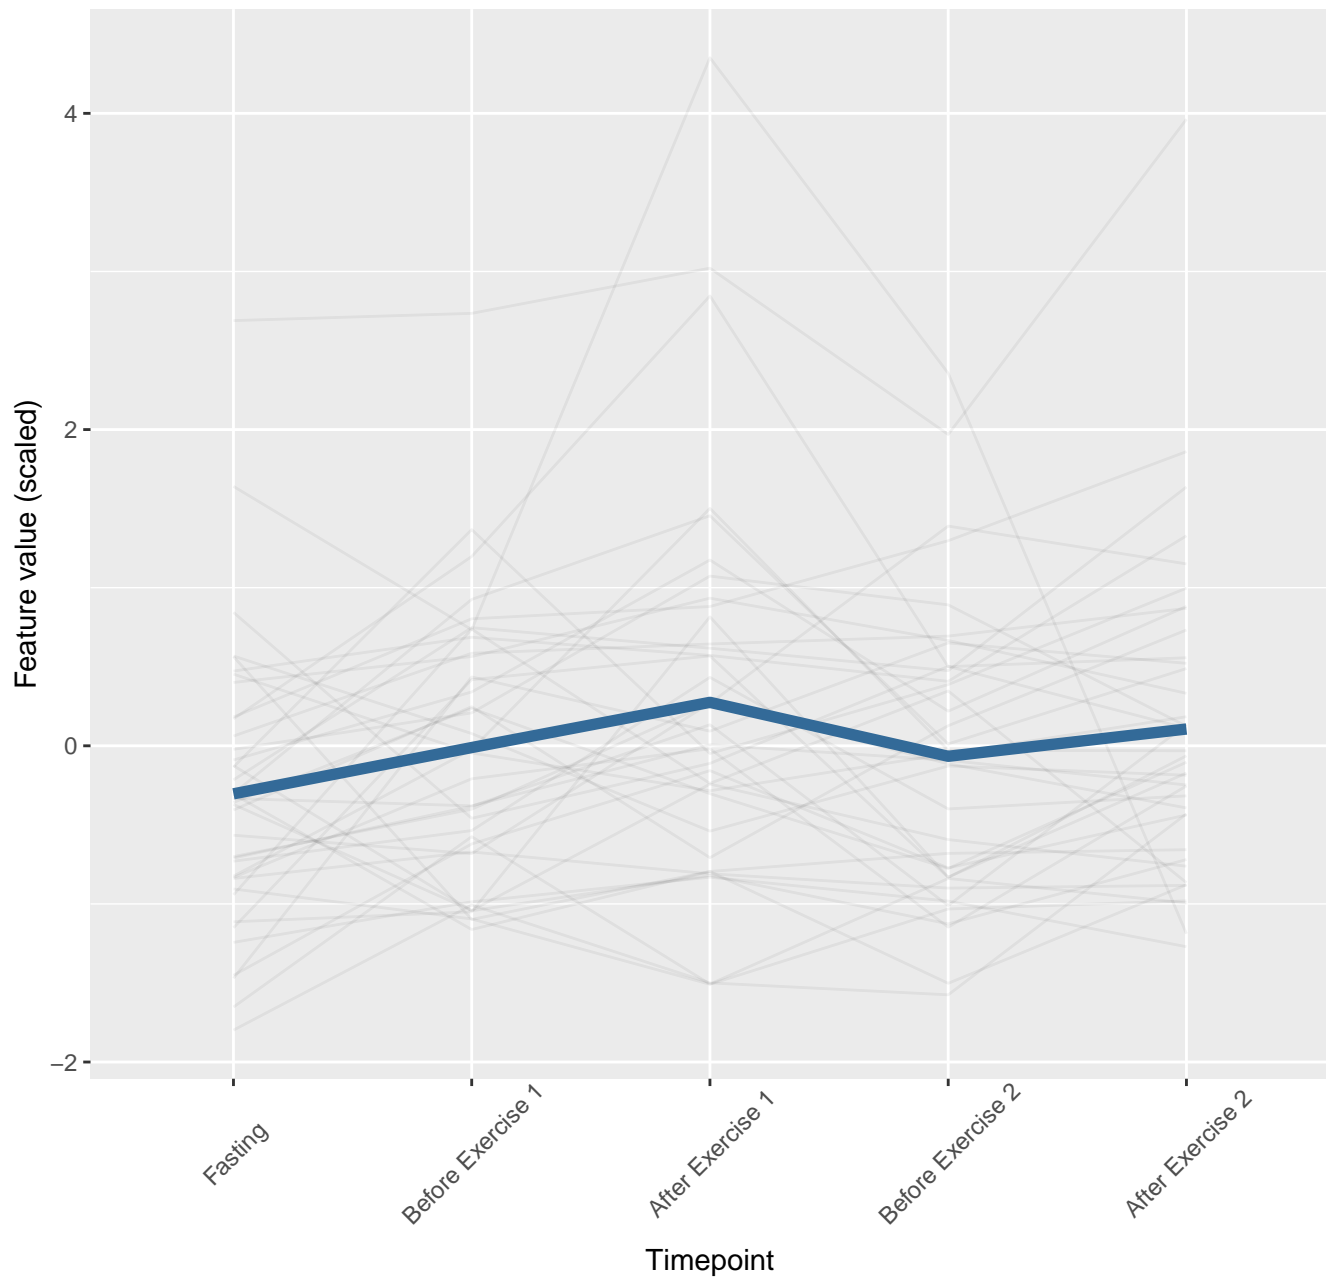

Line plot of PE(36:4)

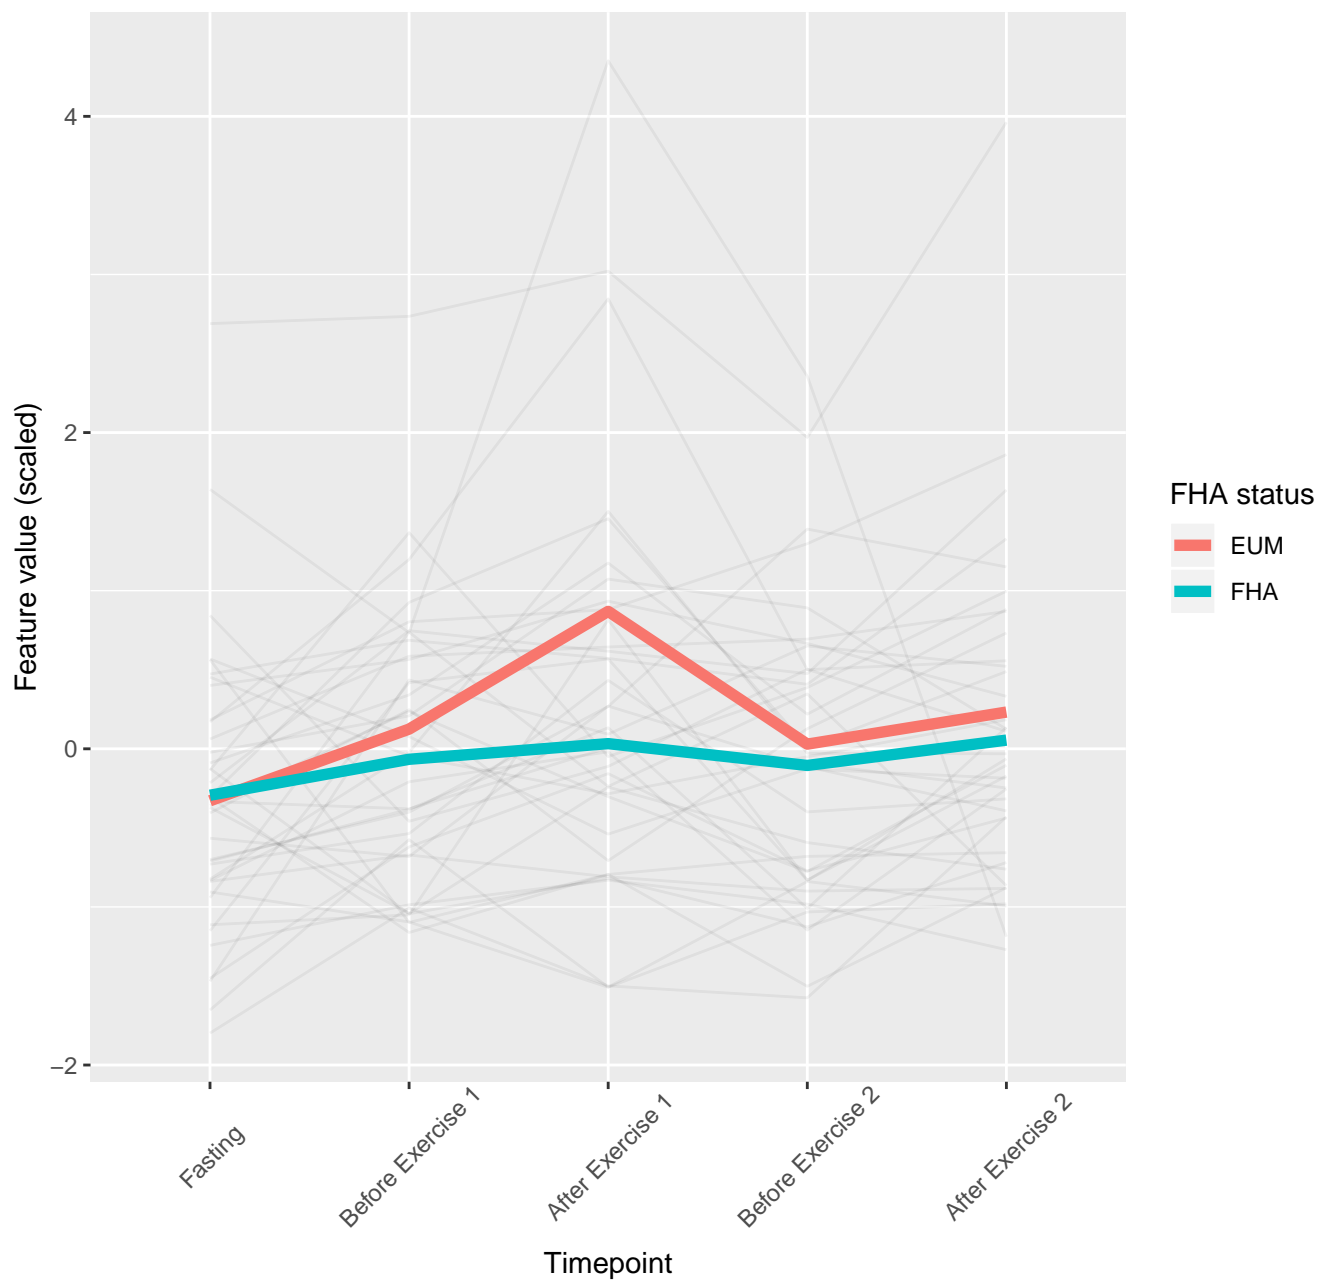

Line plot of PE(36:4)

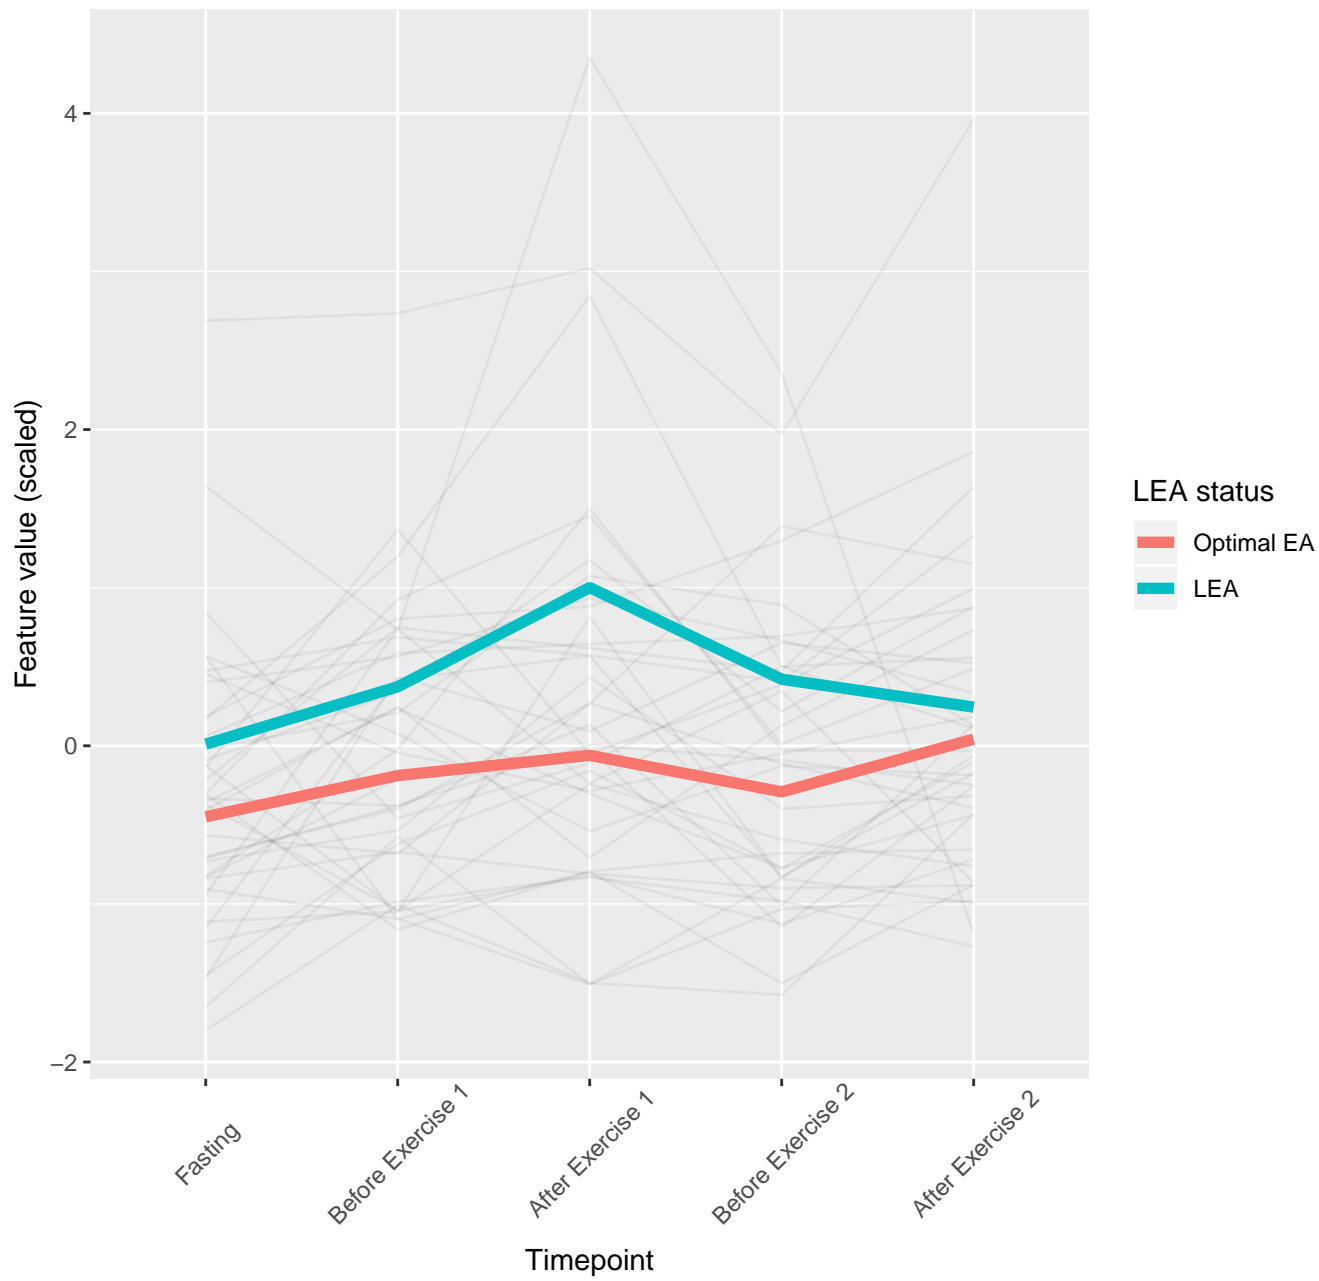

Line plot of PE(38:4)

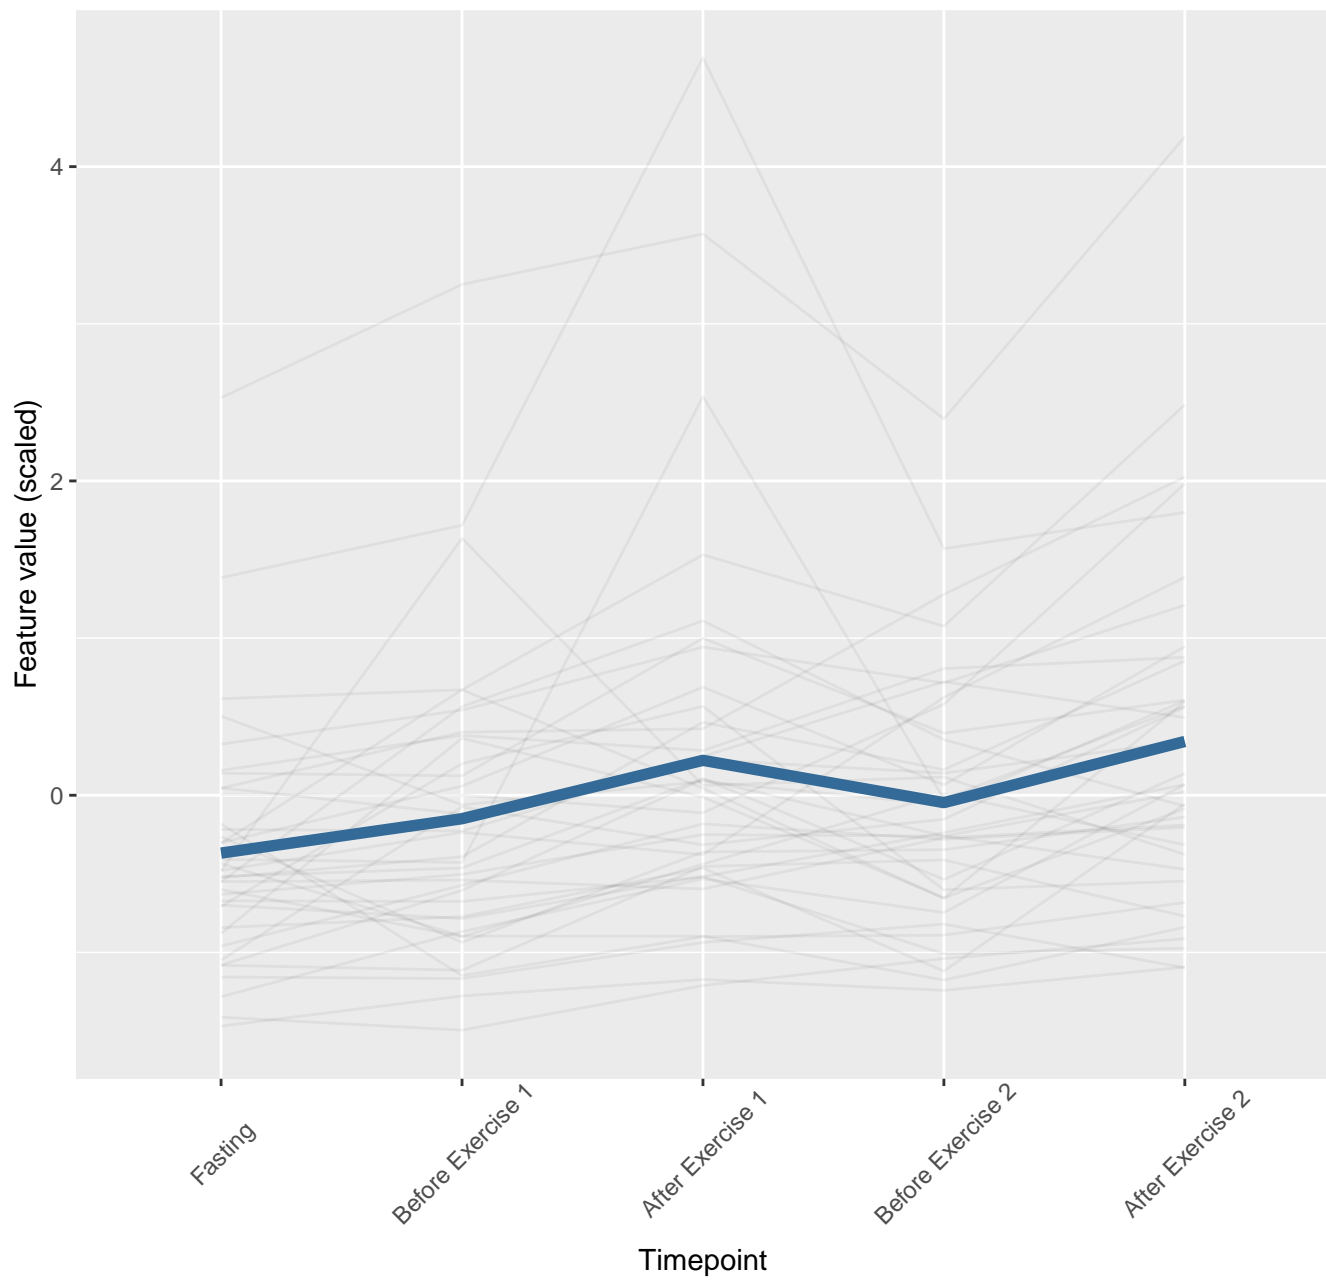

Line plot of PE(38:4)

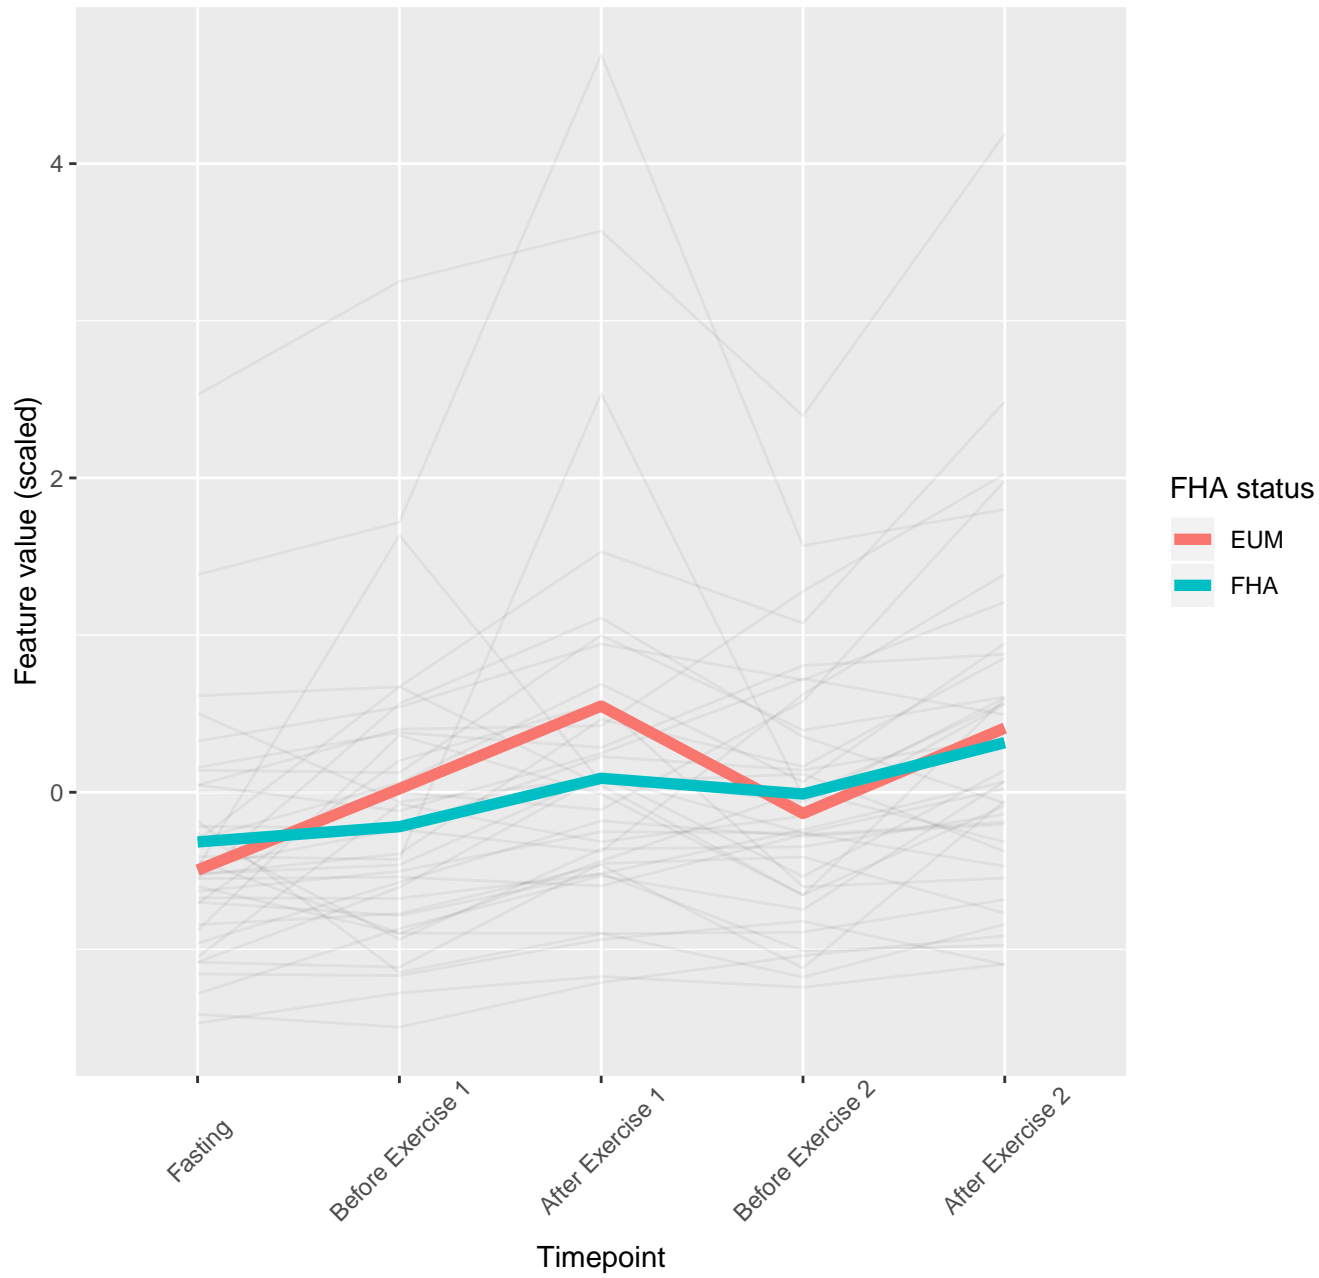

Line plot of PE(38:4)

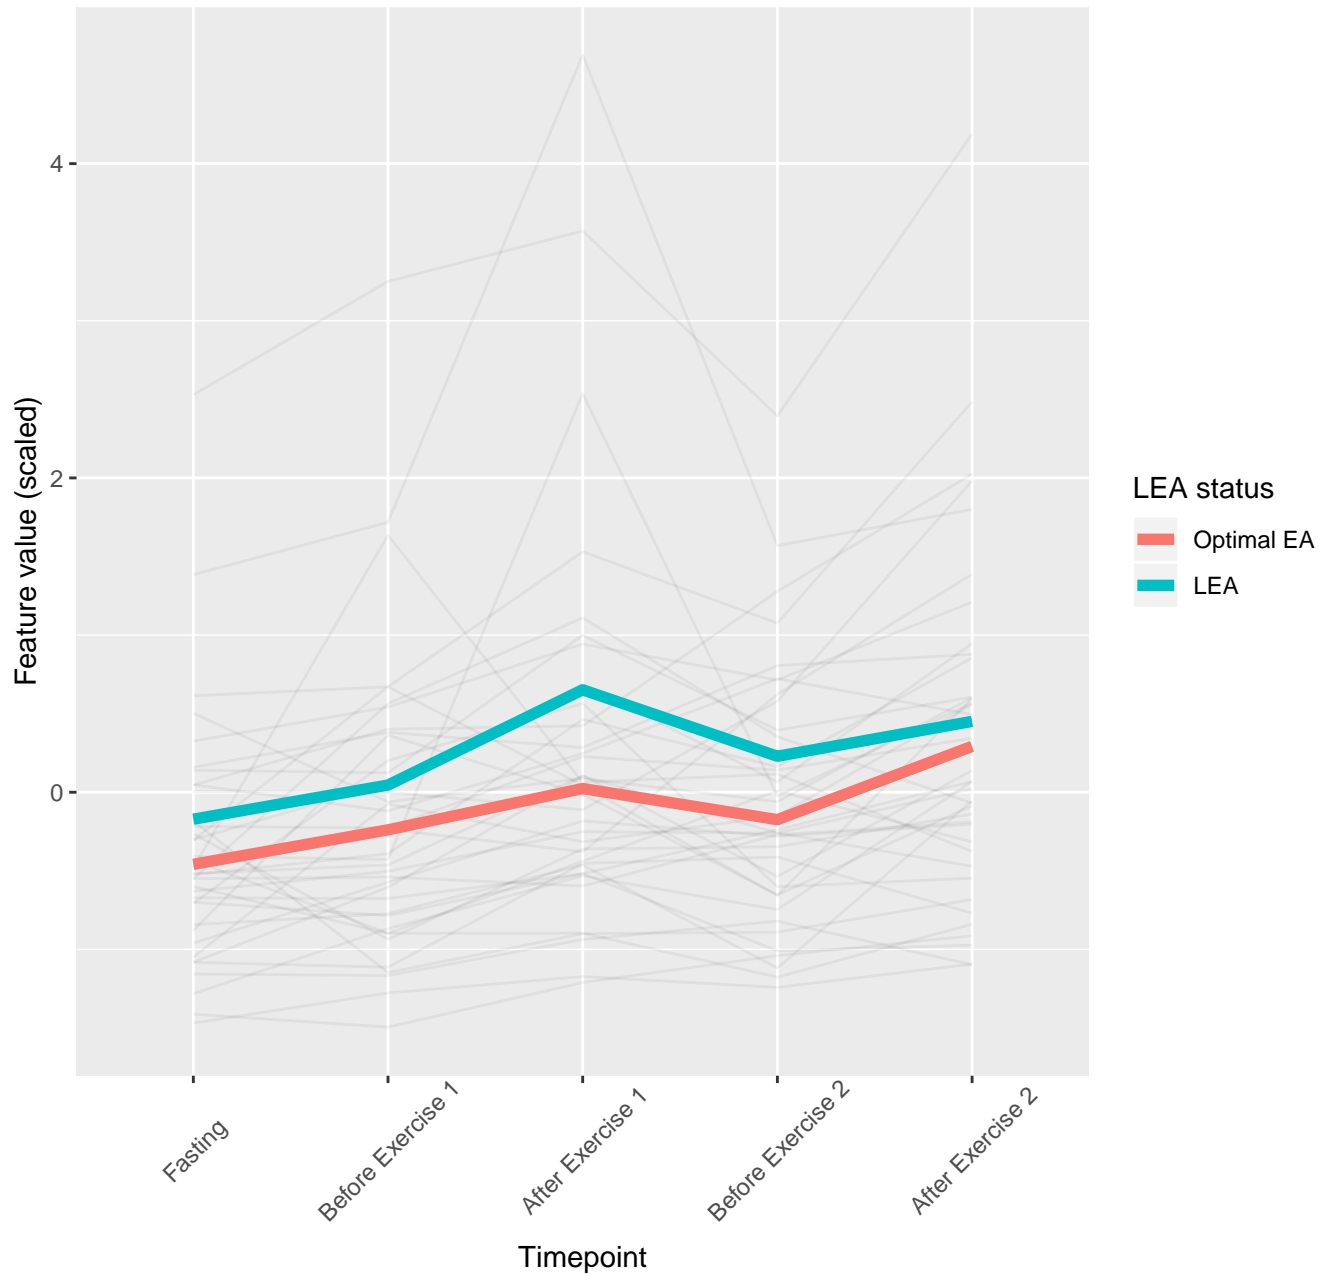

Line plot of PE(38:6)

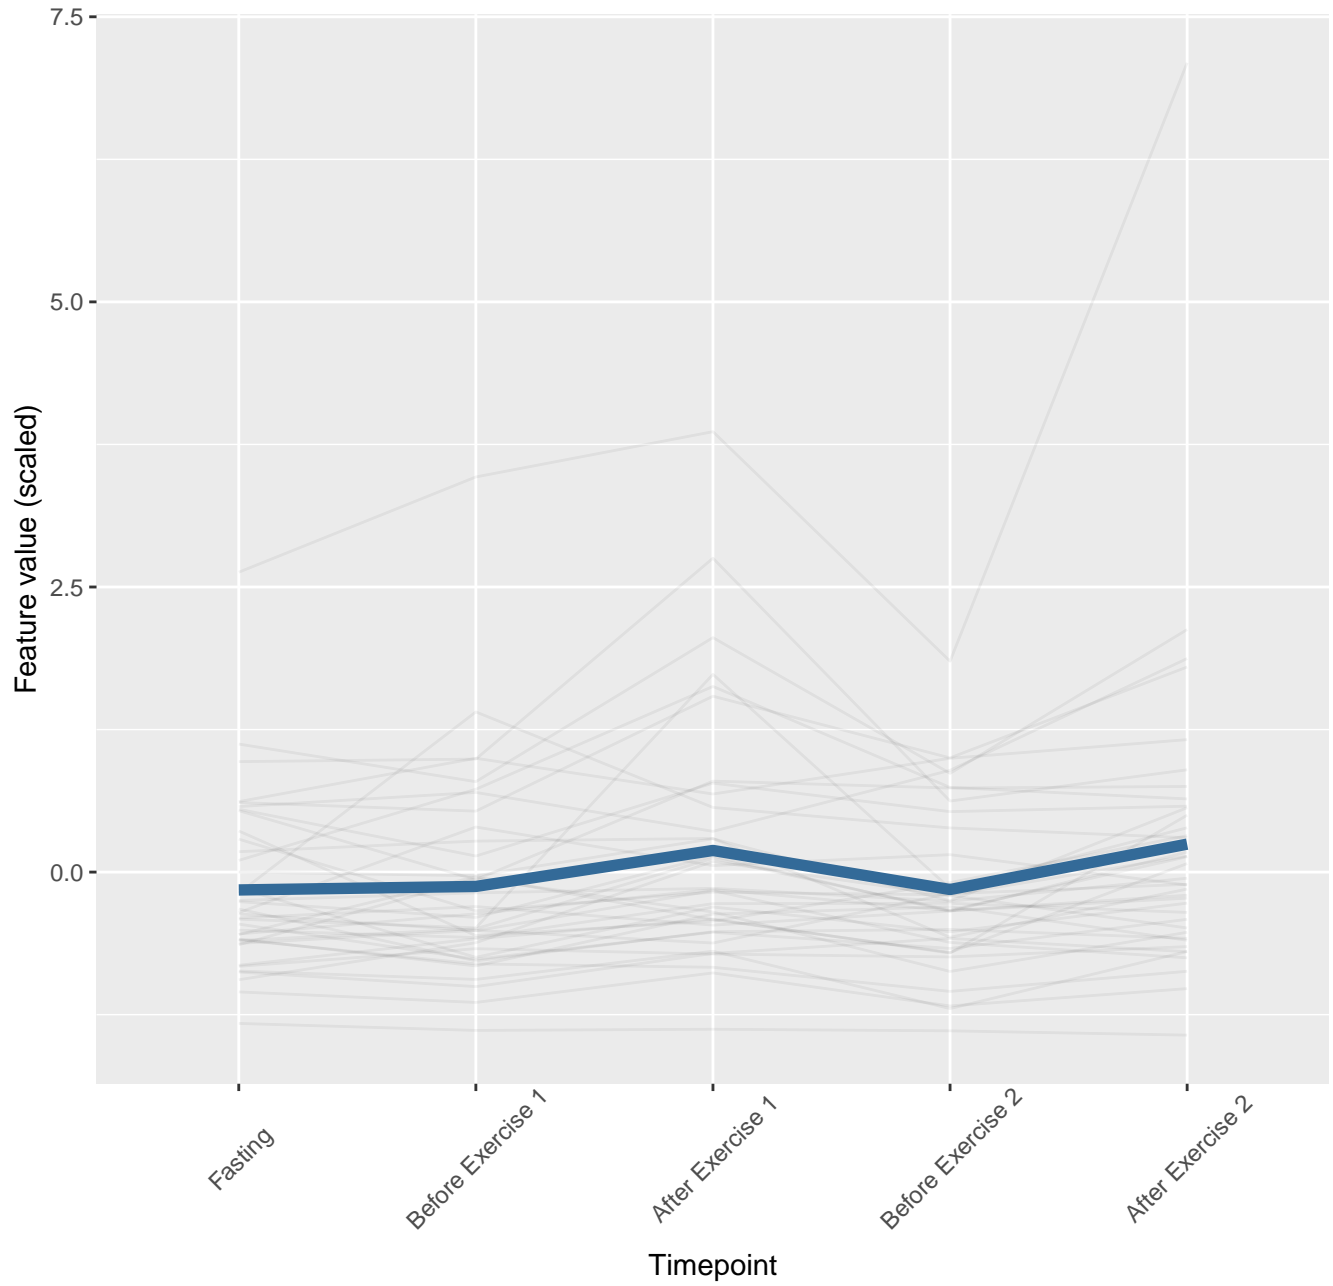

Line plot of PE(38:6)

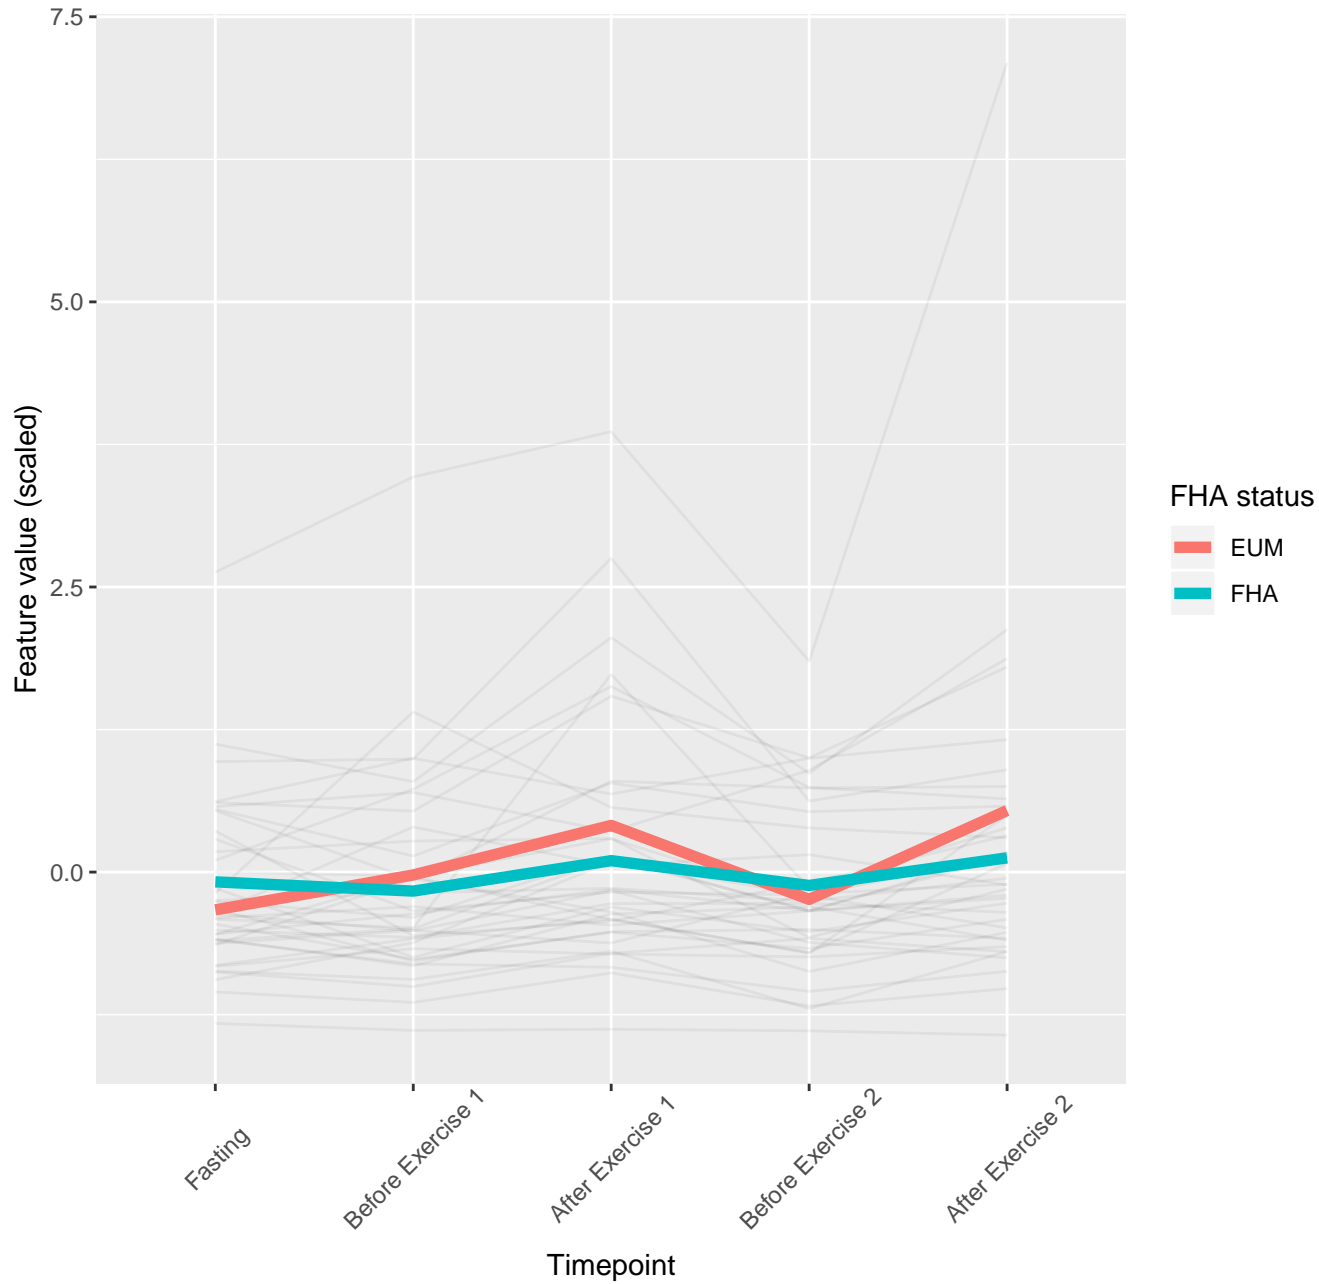



Line plot of PE(38:6)

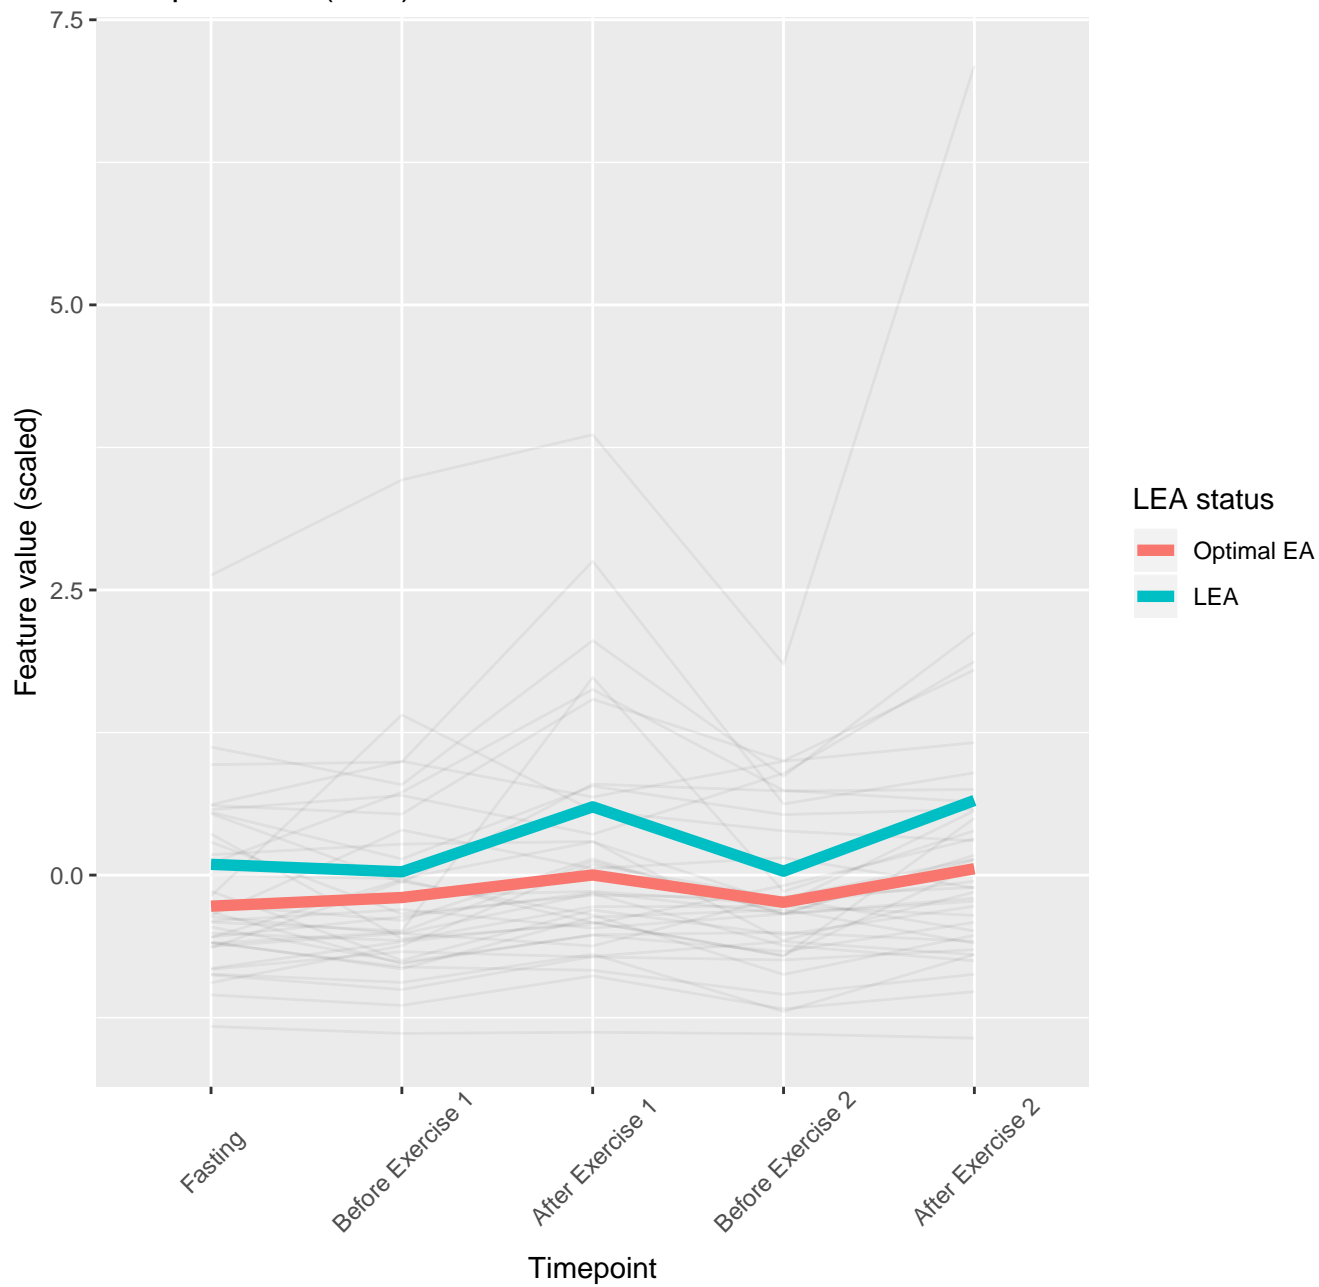

Line plot of PE(O-16:0/22:6) or PE(P-18:0/20:5)

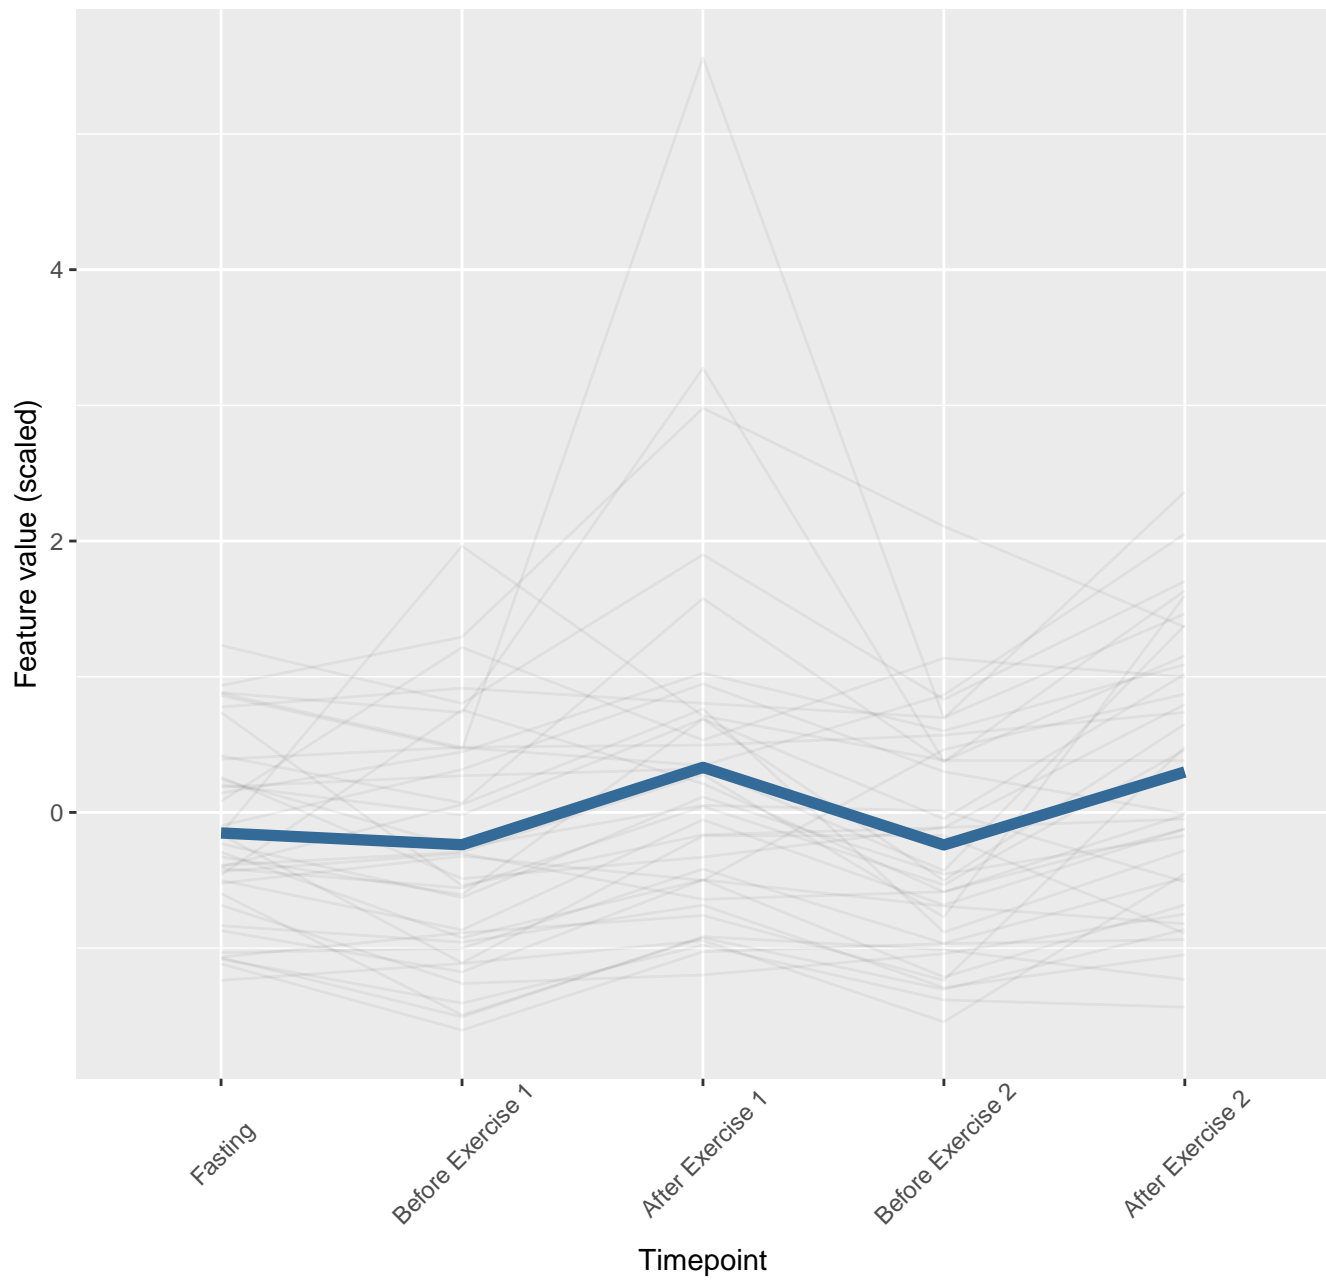

Line plot of PE(O-16:0/22:6) or PE(P-18:0/20:5)

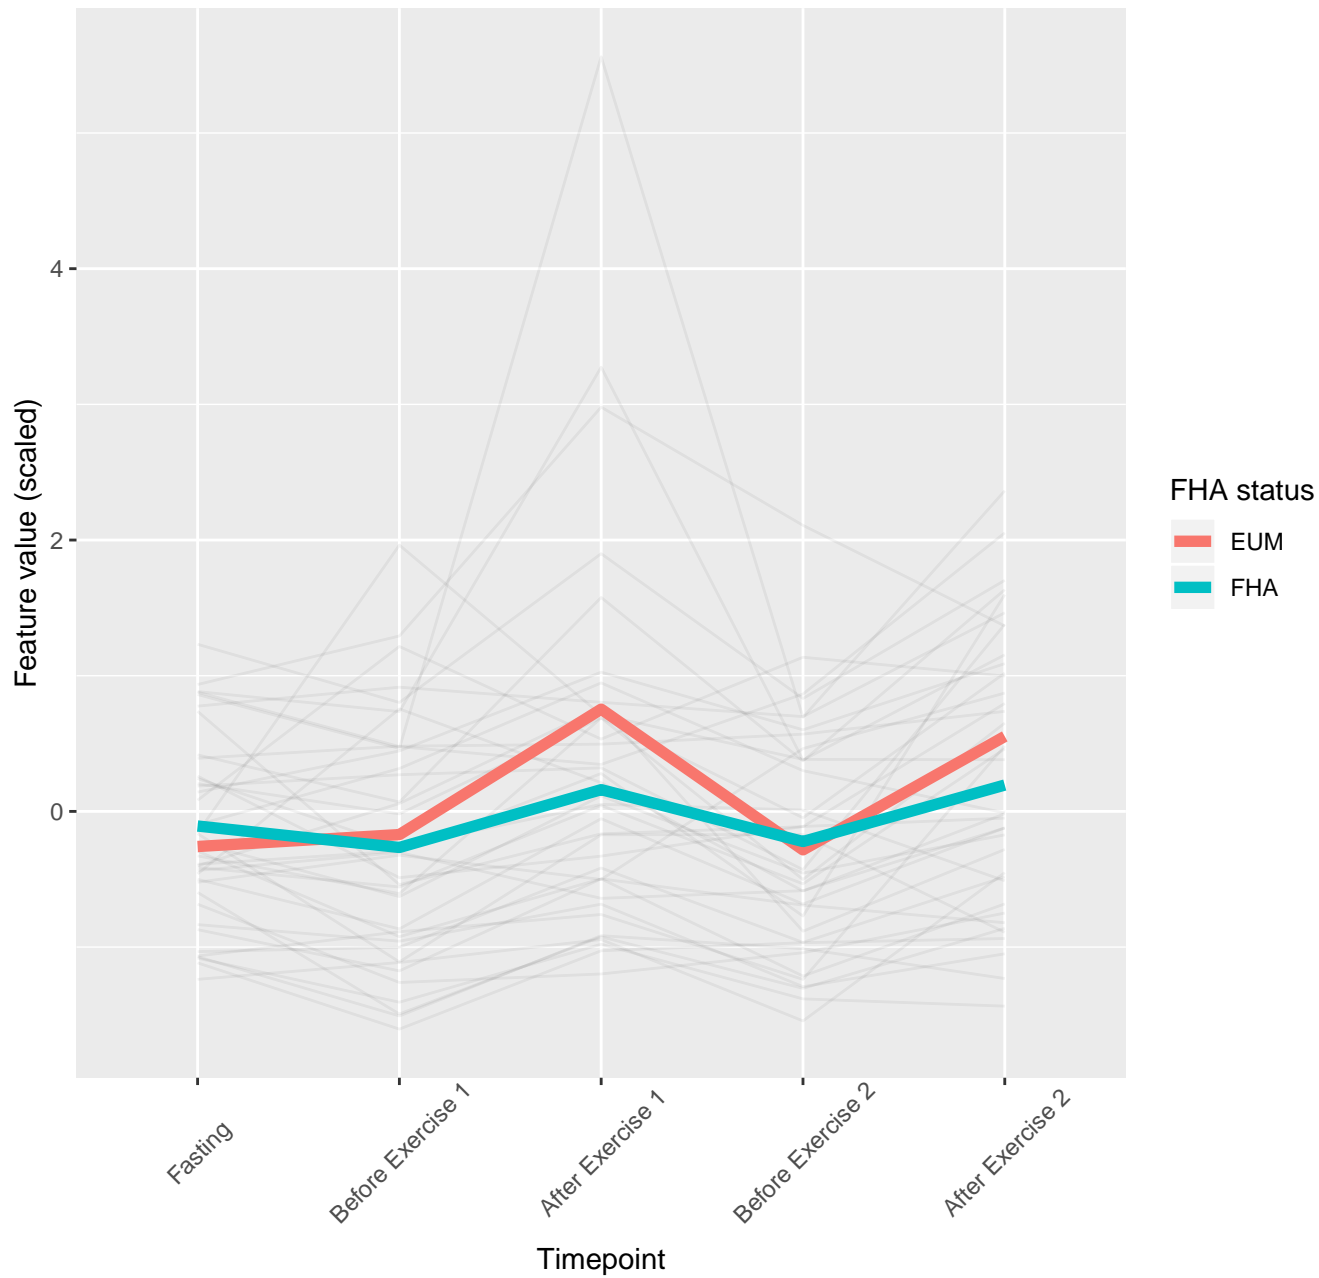

Line plot of PE(O-16:0/22:6) or PE(P-18:0/20:5)

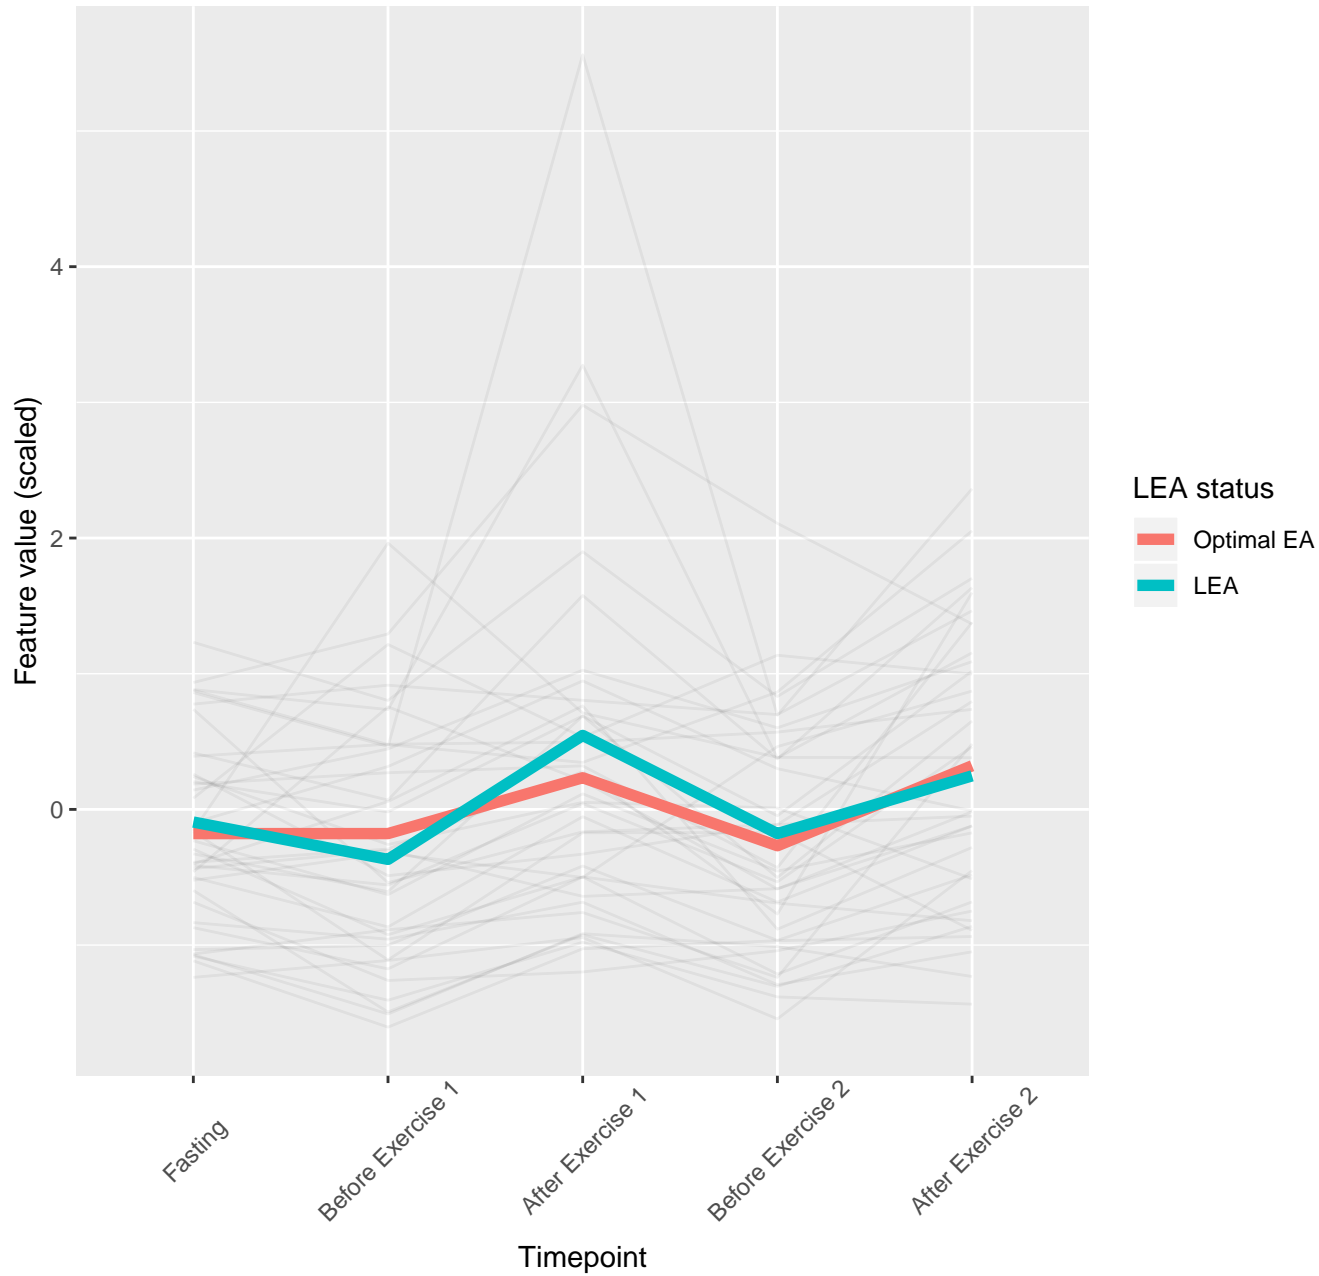

Line plot of PE(O-38:5) or PE(P-38:4)

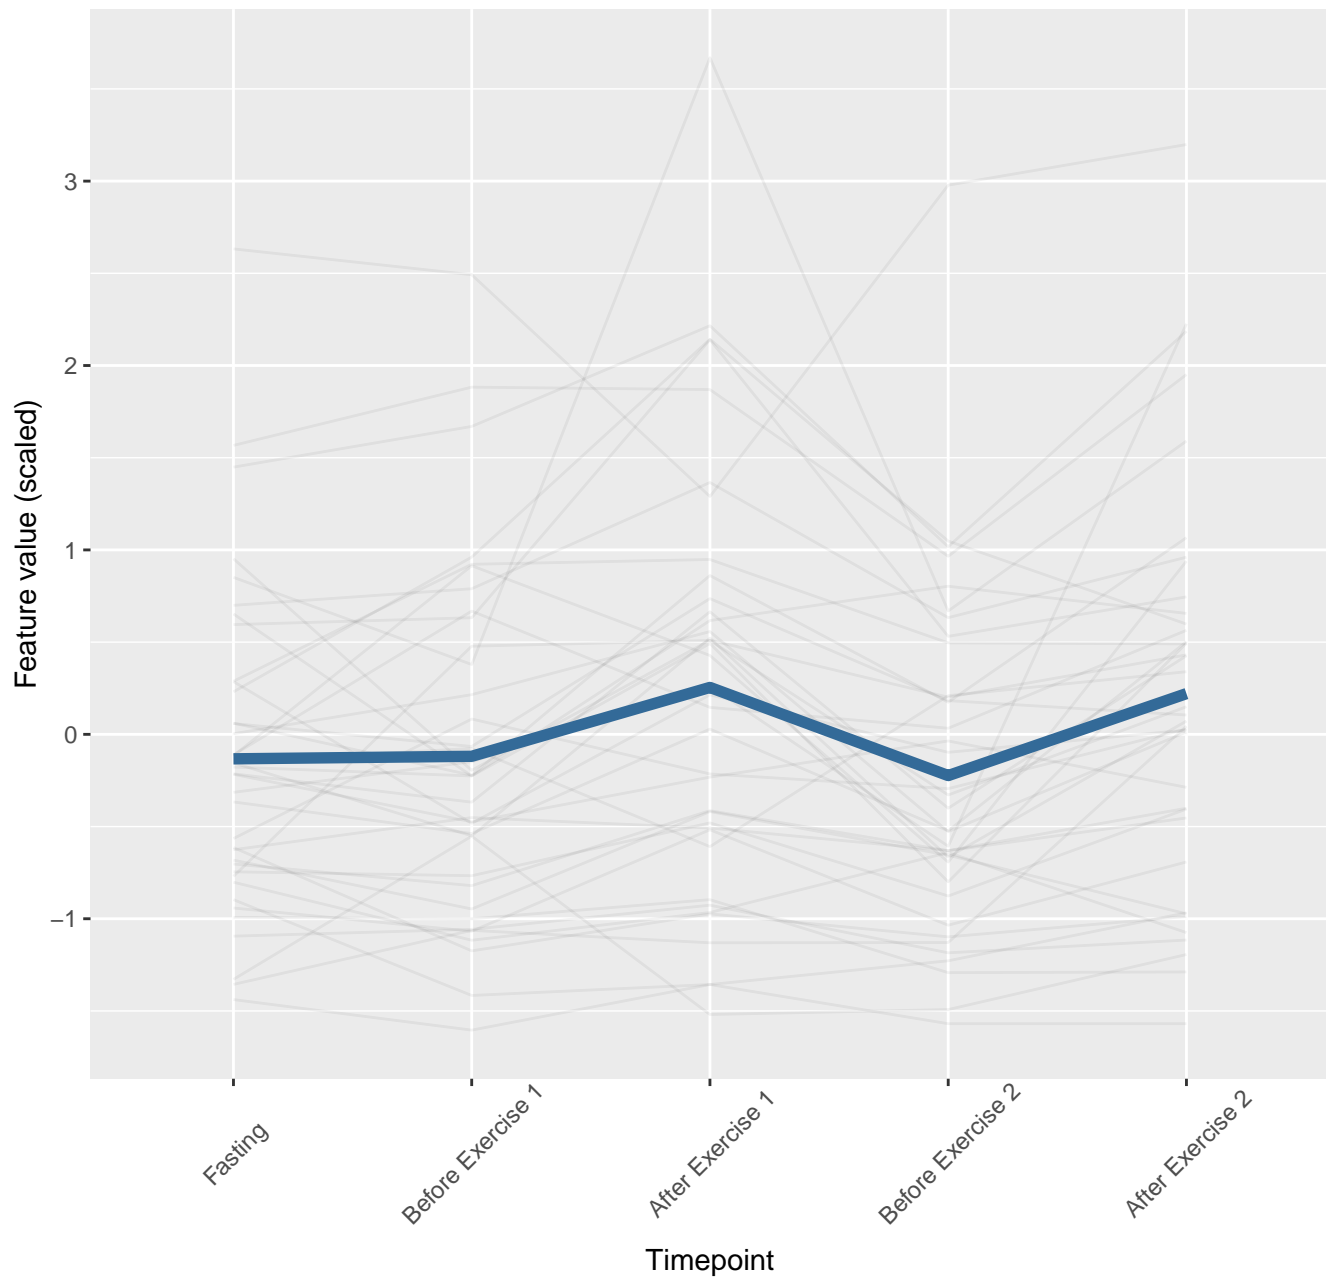

Line plot of PE(O-38:5) or PE(P-38:4)

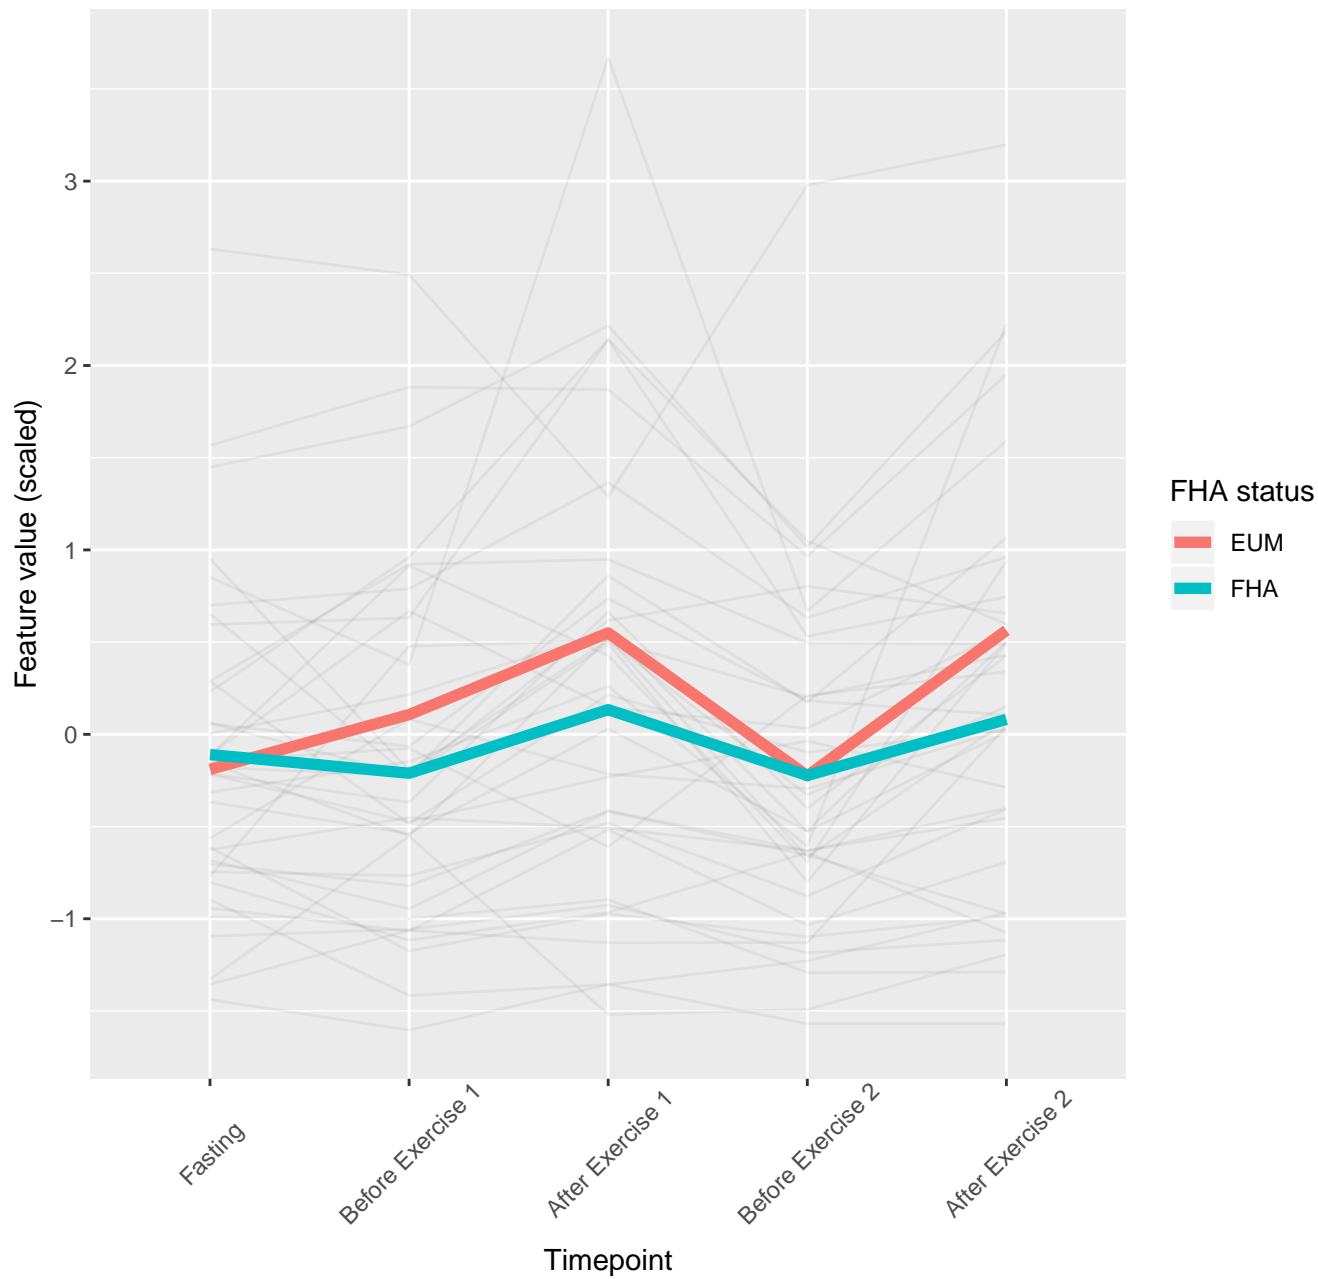

Line plot of PE(O-38:5) or PE(P-38:4)

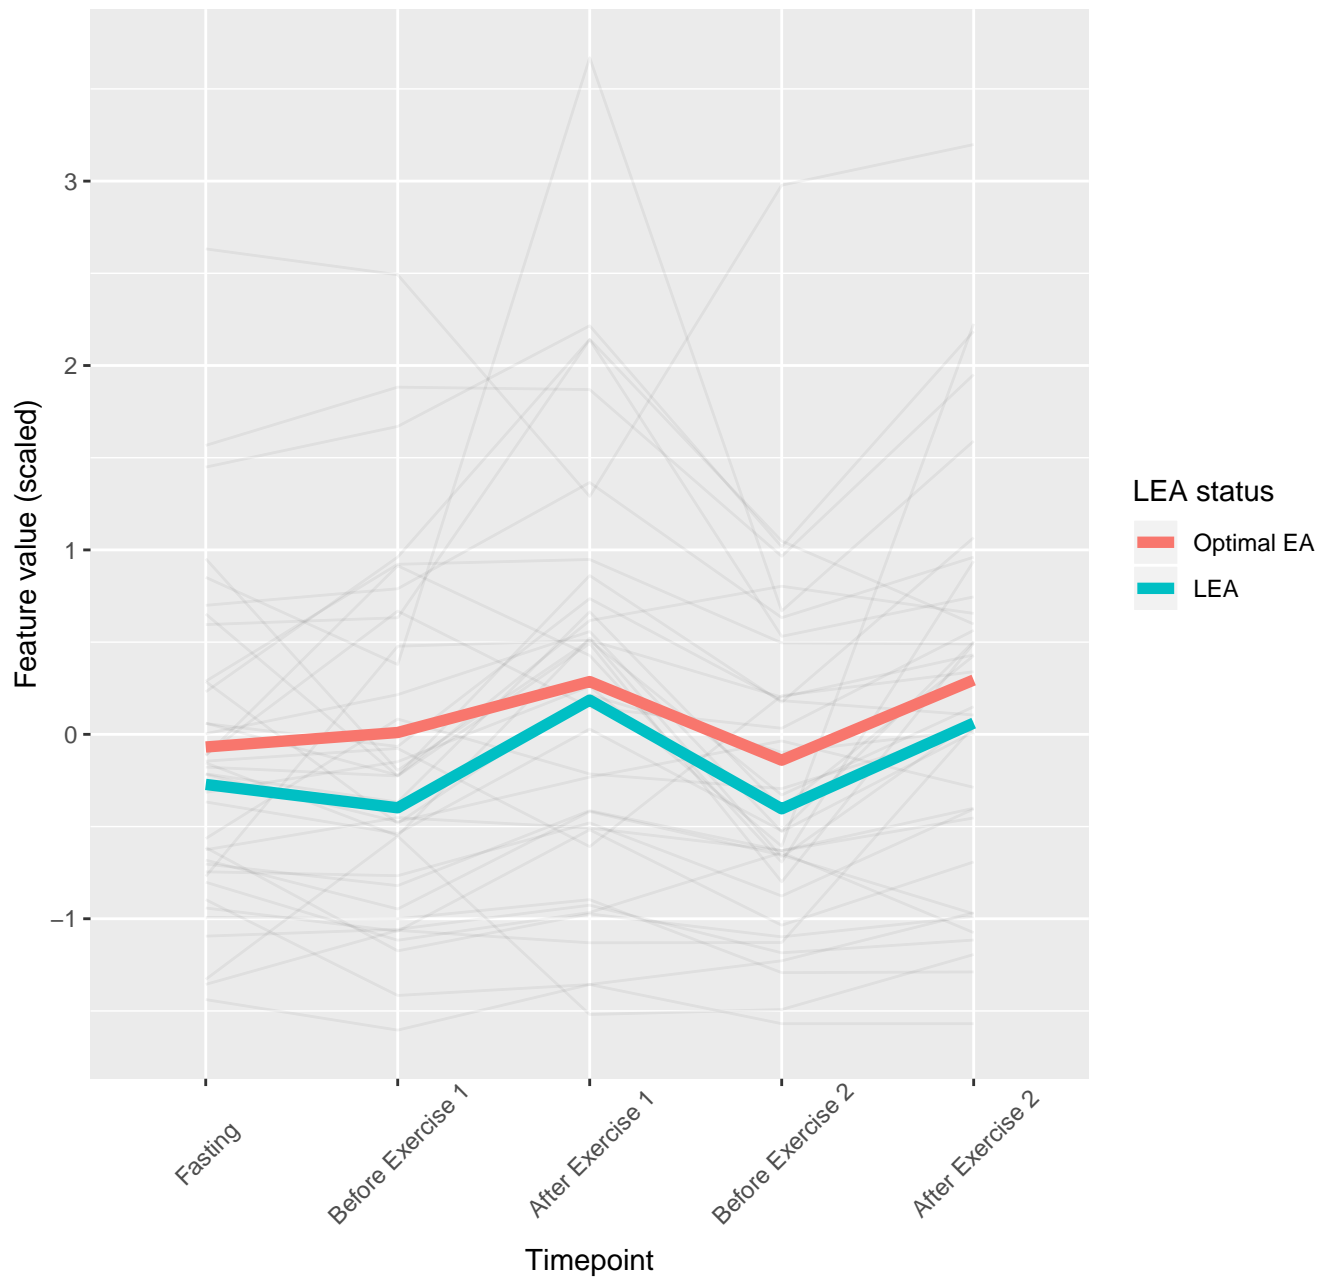

Line plot of PE(P-18:0/22:6)

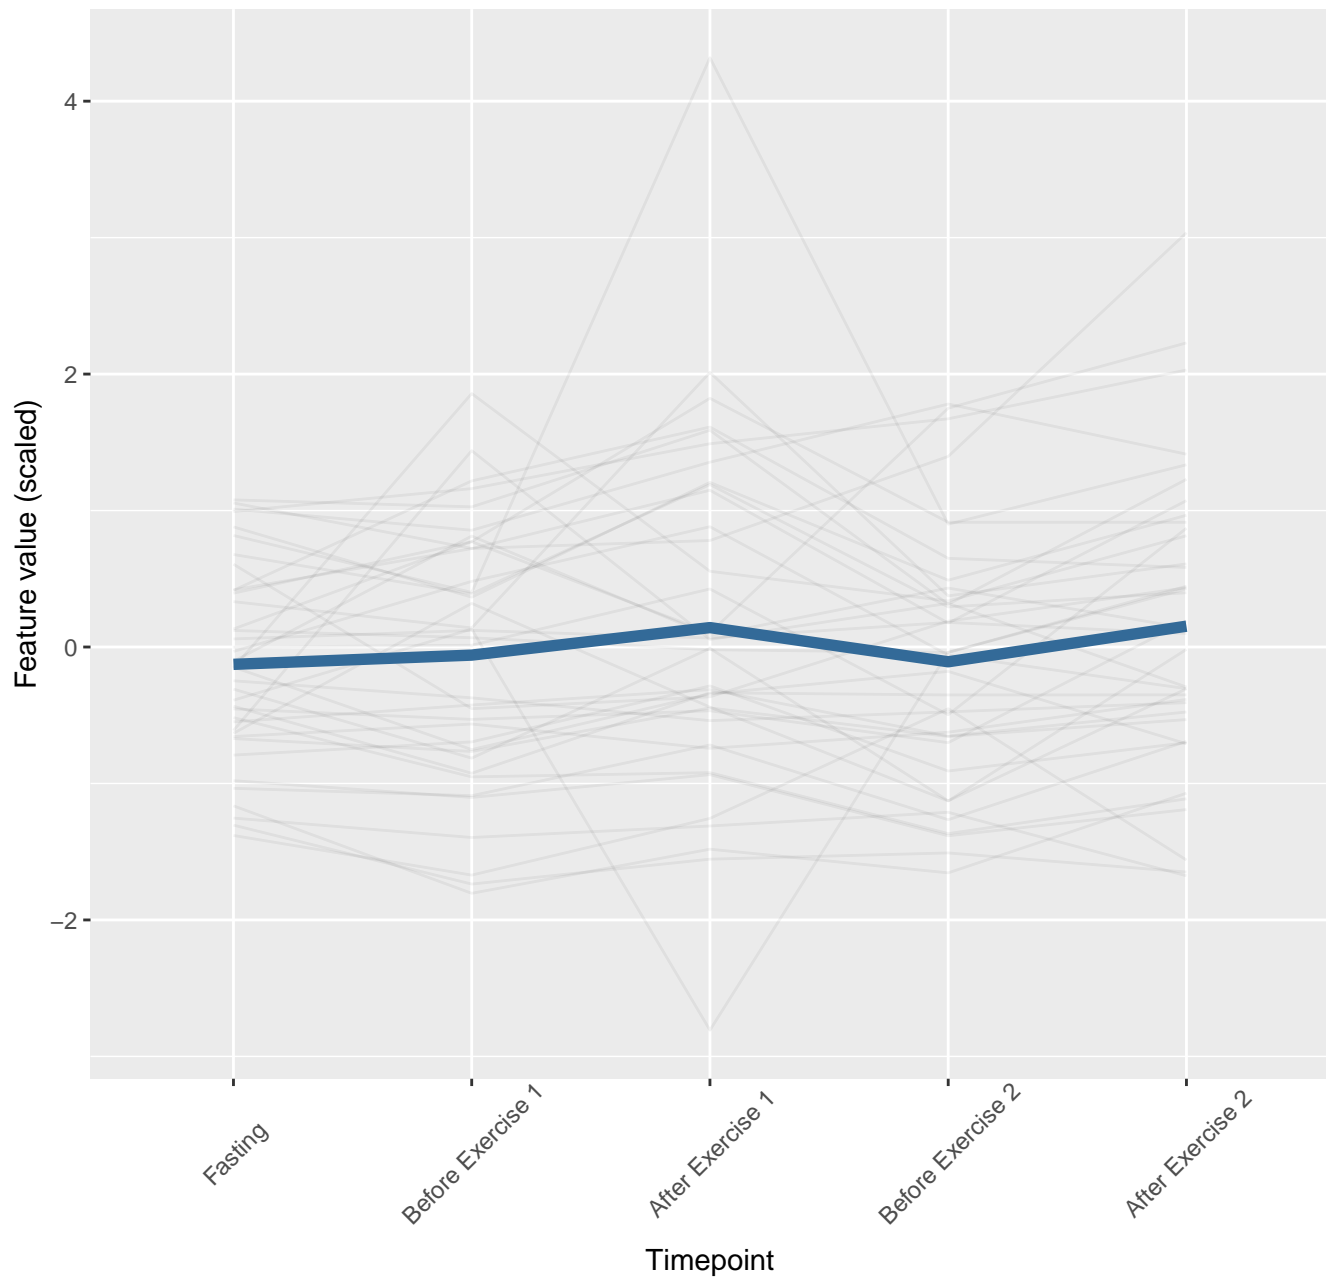



Line plot of PE(P-18:0/22:6)

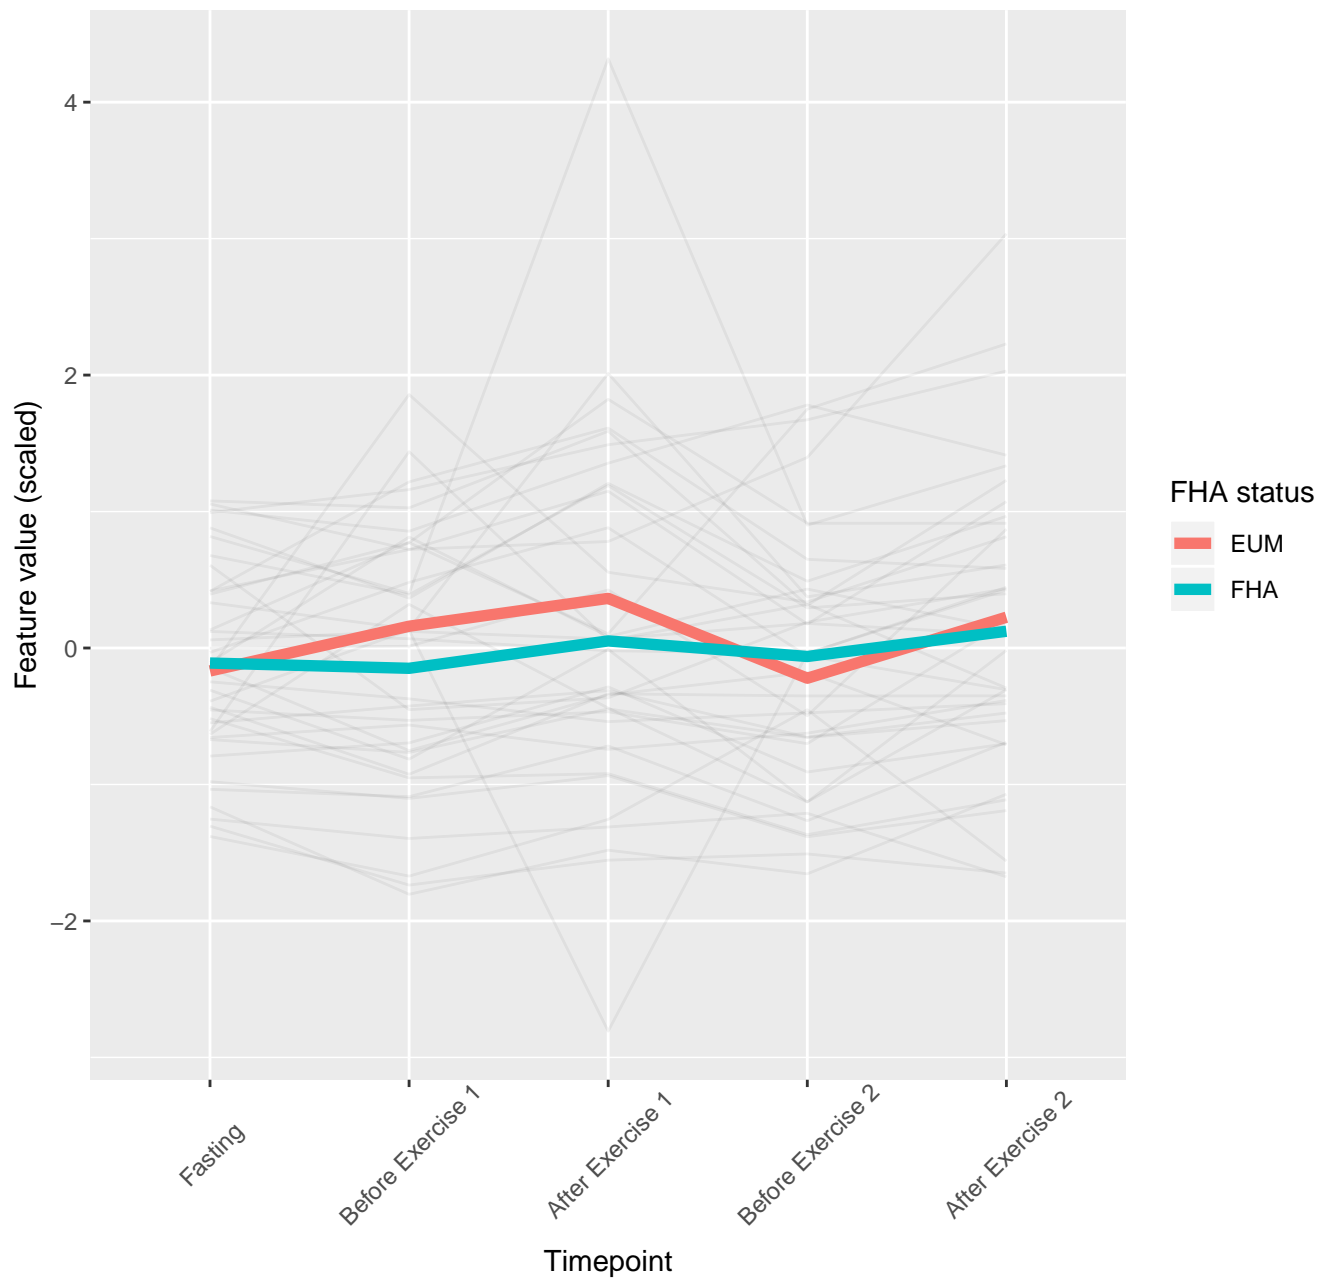

Line plot of PE(P-18:0/22:6)

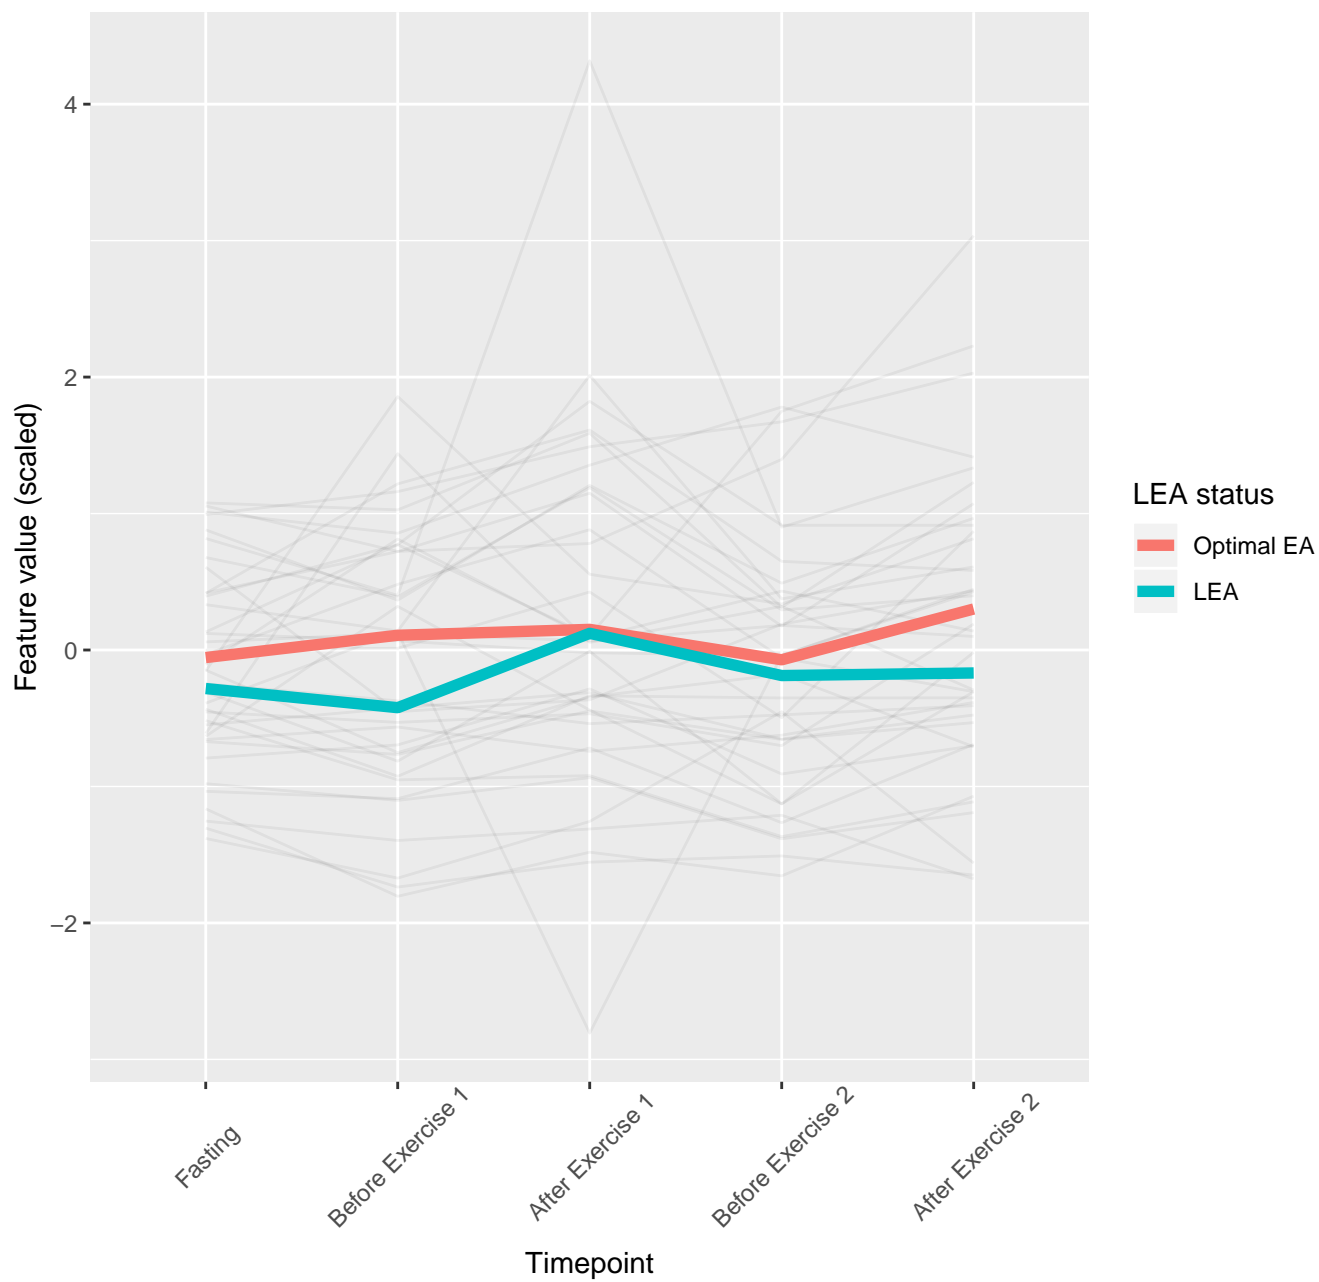

# SPHINGOLIPIDS

Line plot of SM(42:2)

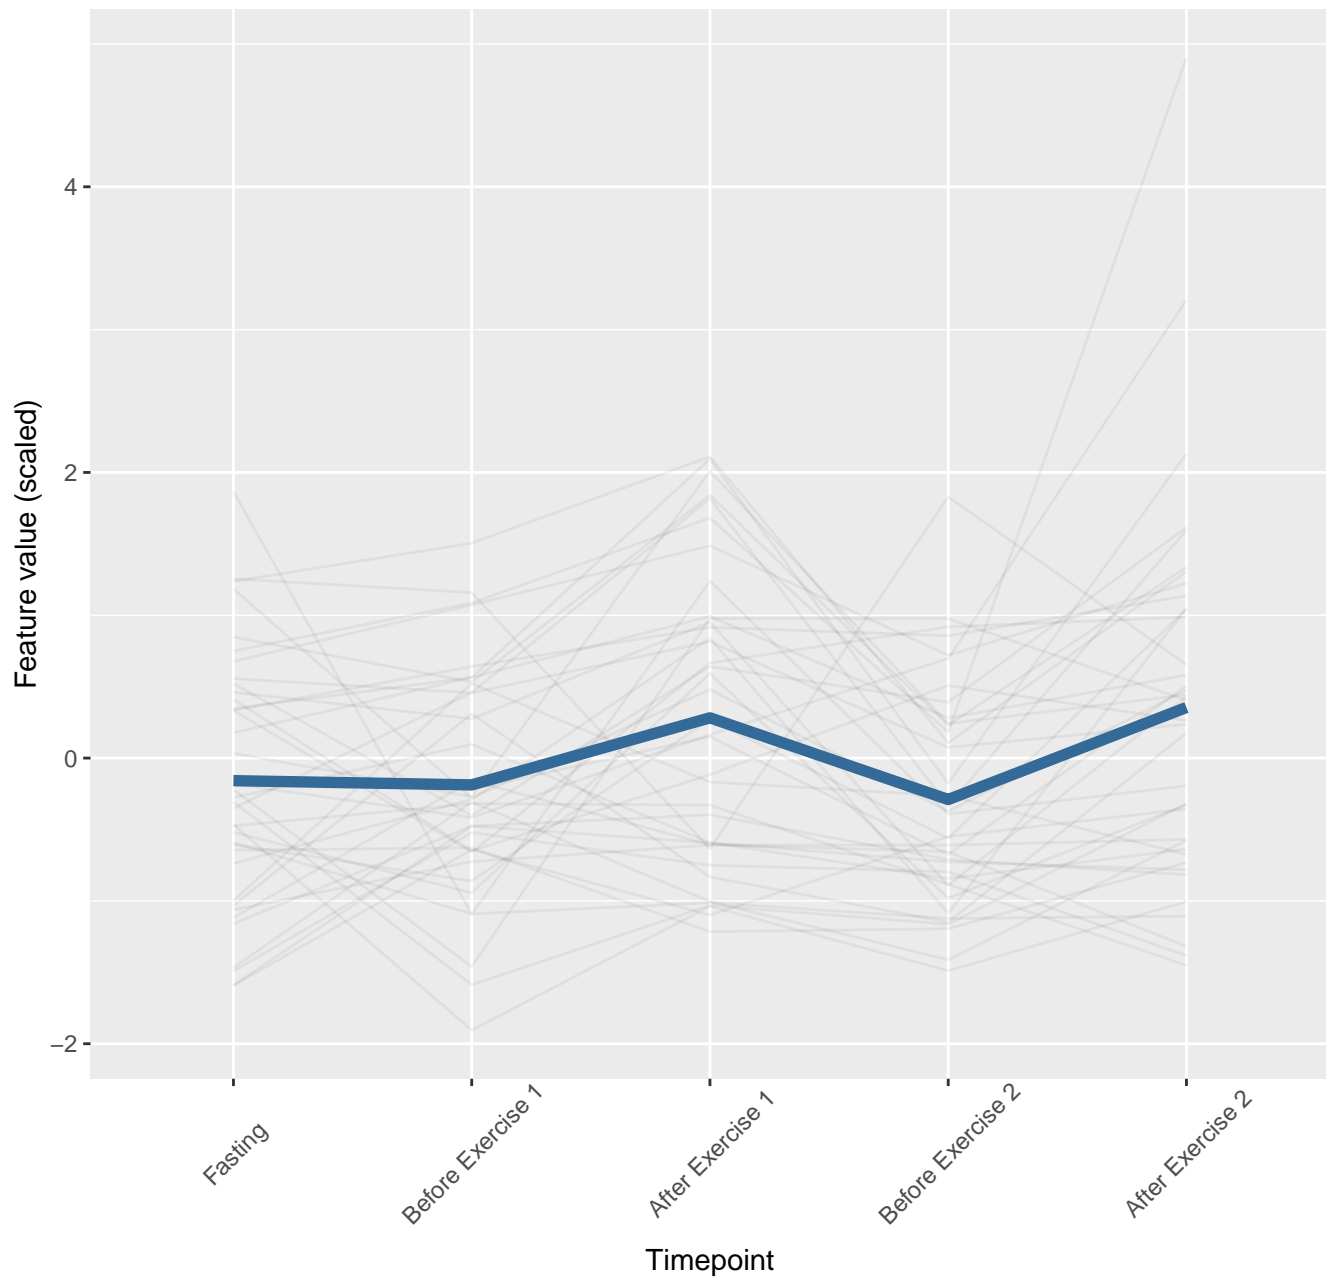

Line plot of SM(42:2)

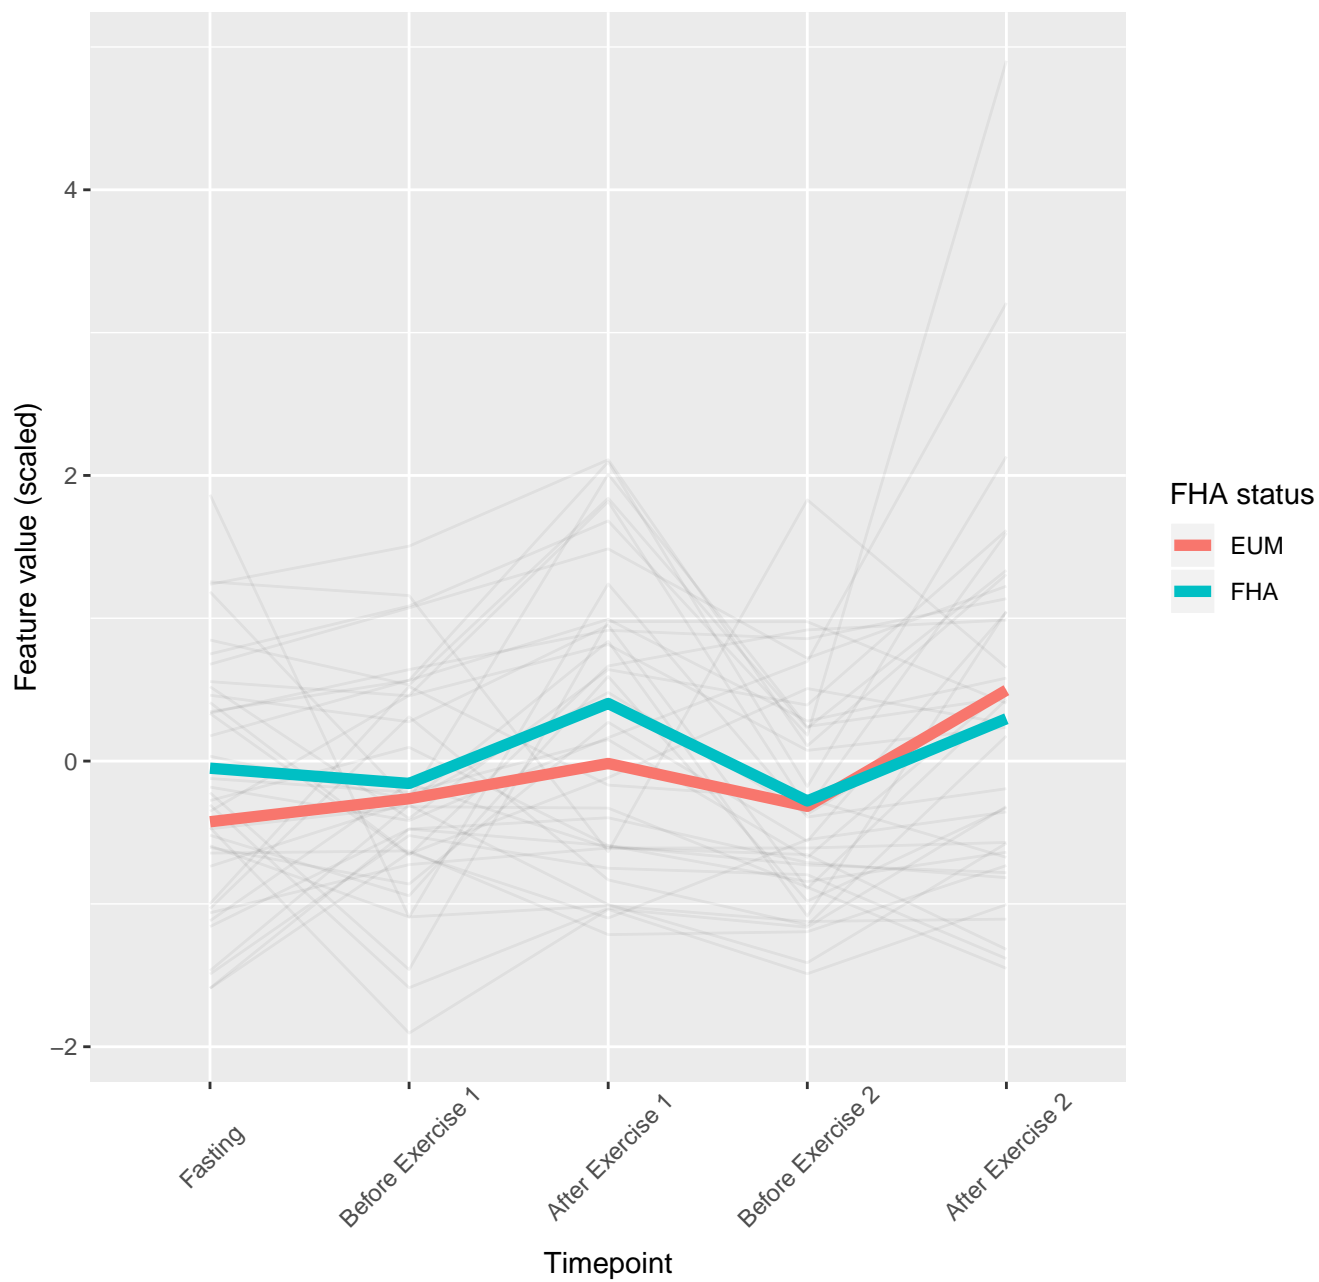

Line plot of SM(42:2)

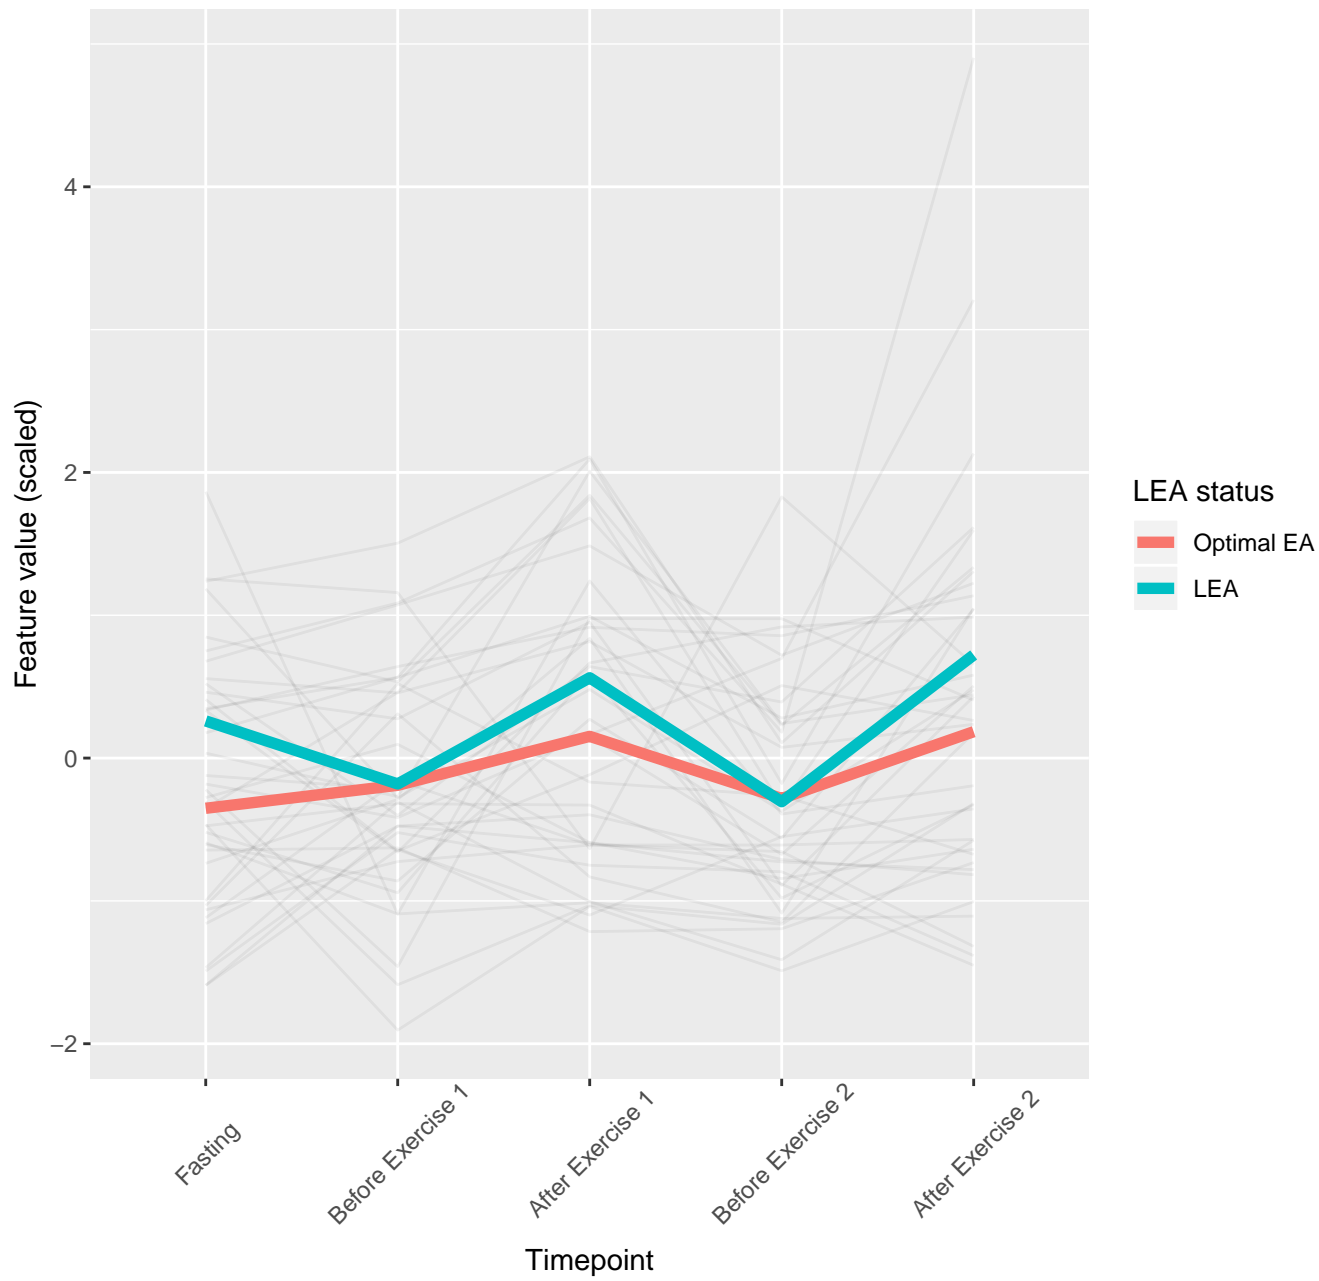

Line plot of SM(d16:1/18:1) or SM(d18:2/16:0)

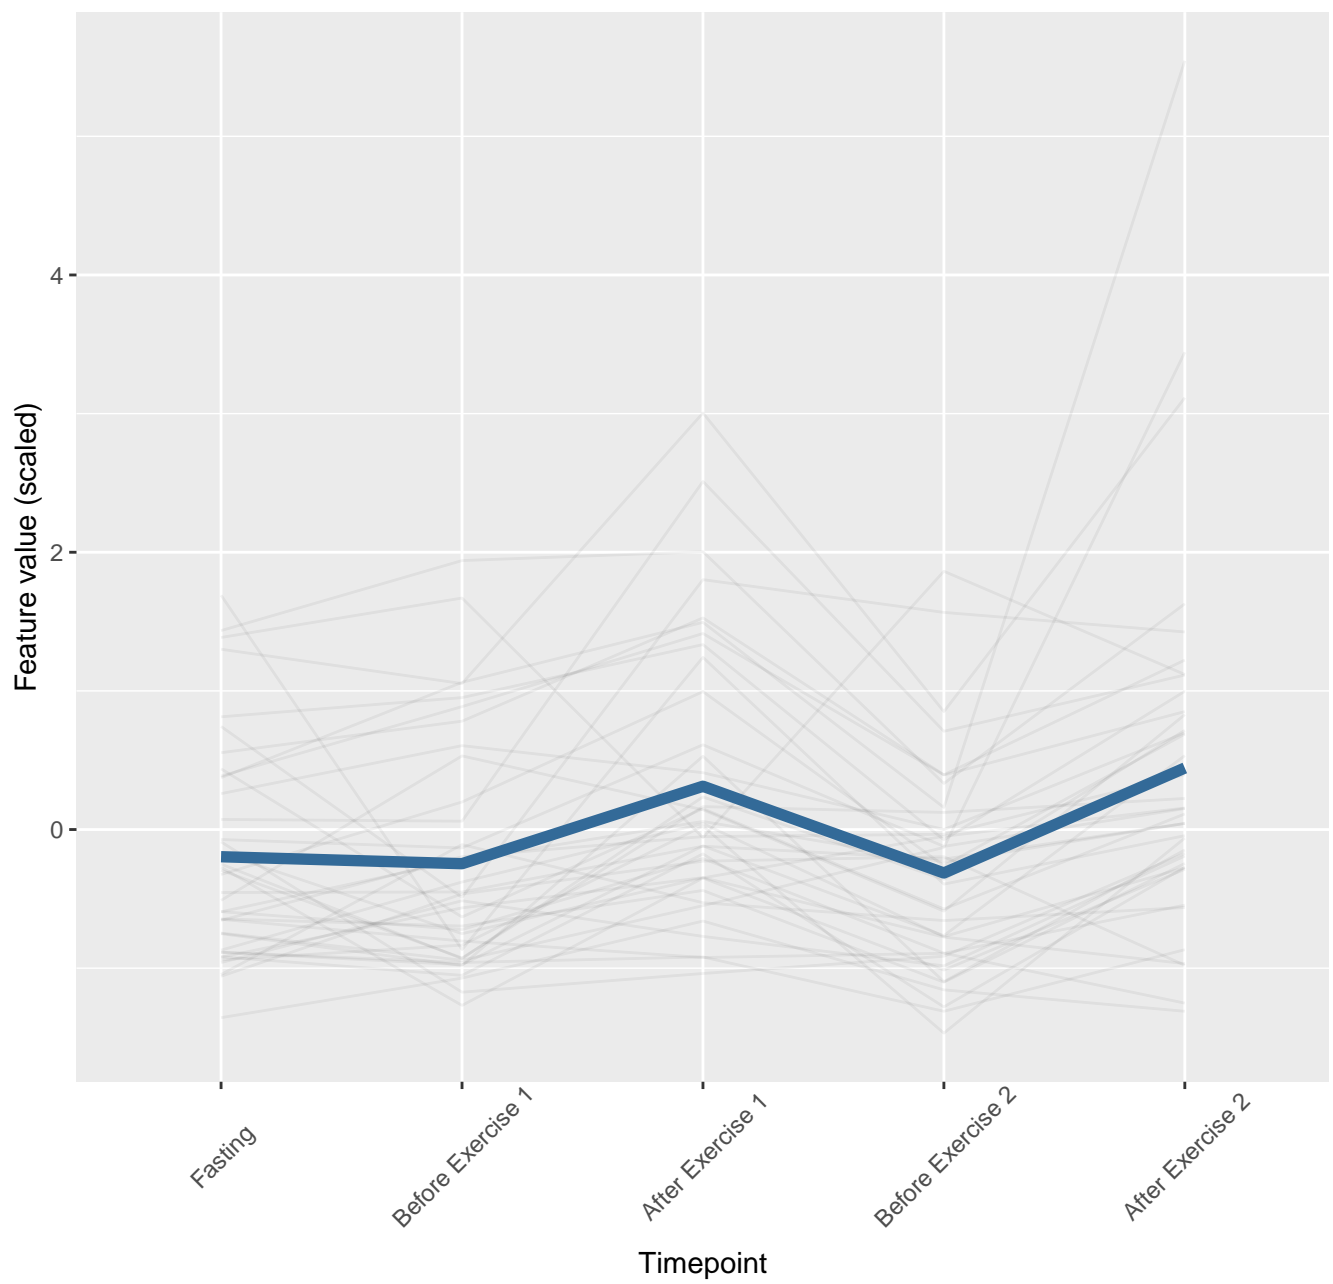

Line plot of SM(d16:1/18:1) or SM(d18:2/16:0)

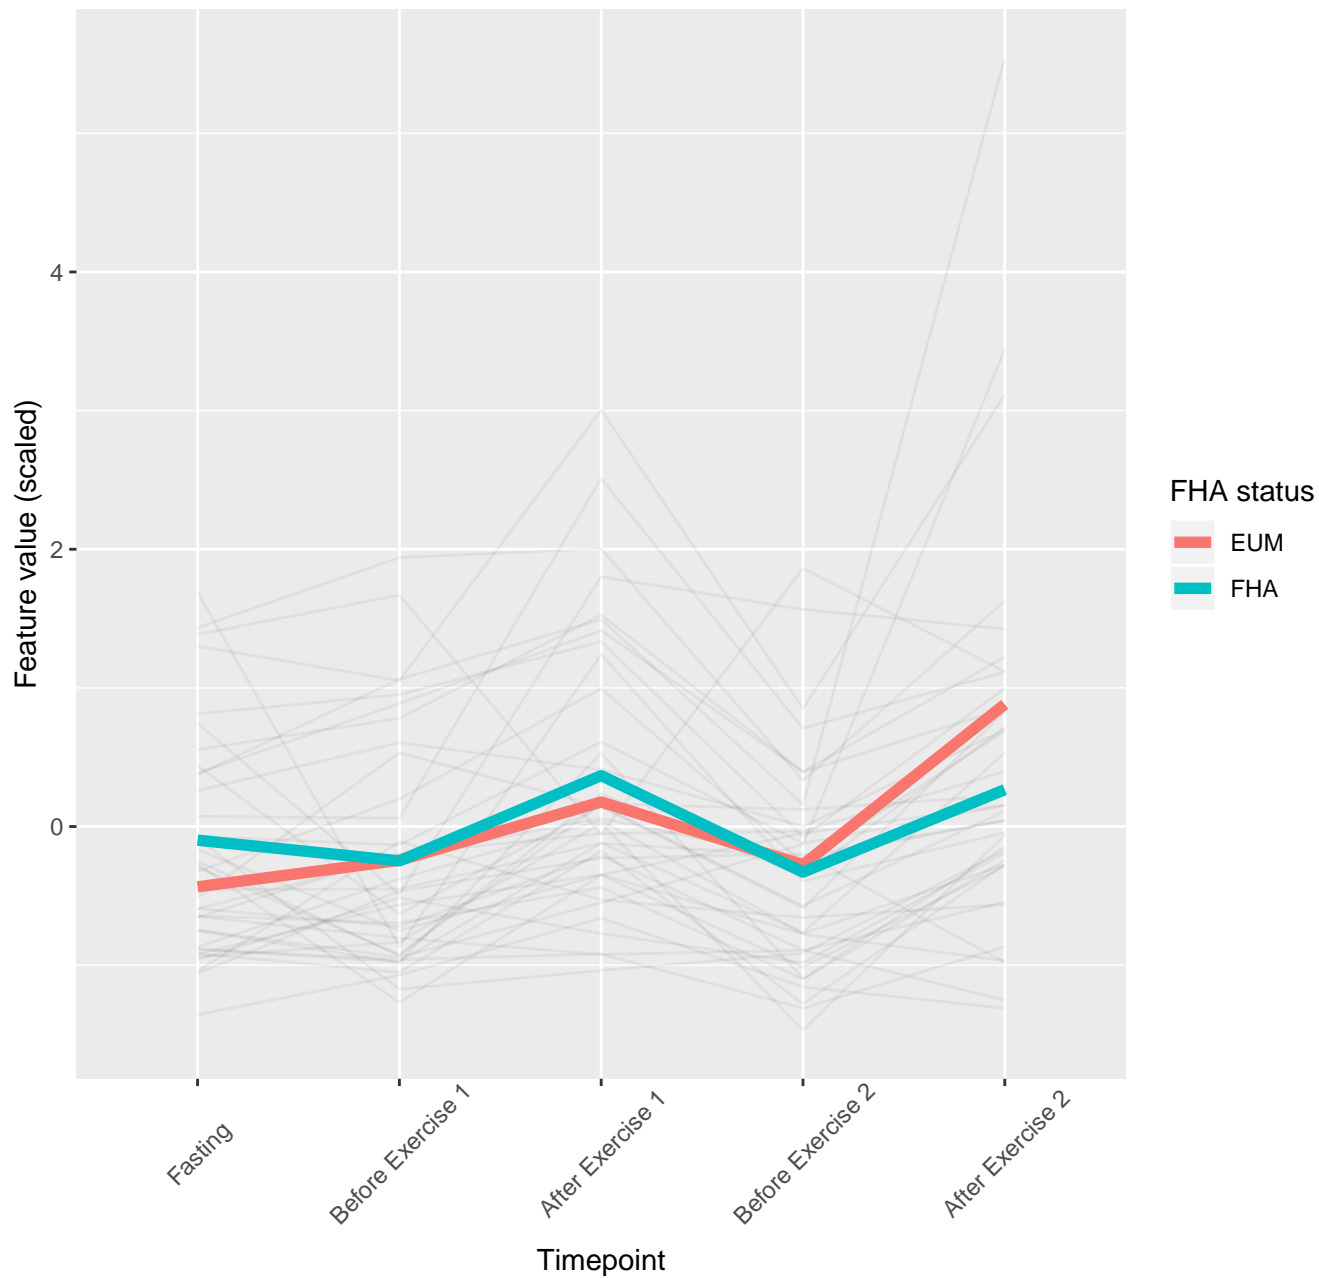



Line plot of SM(d16:1/18:1) or SM(d18:2/16:0)

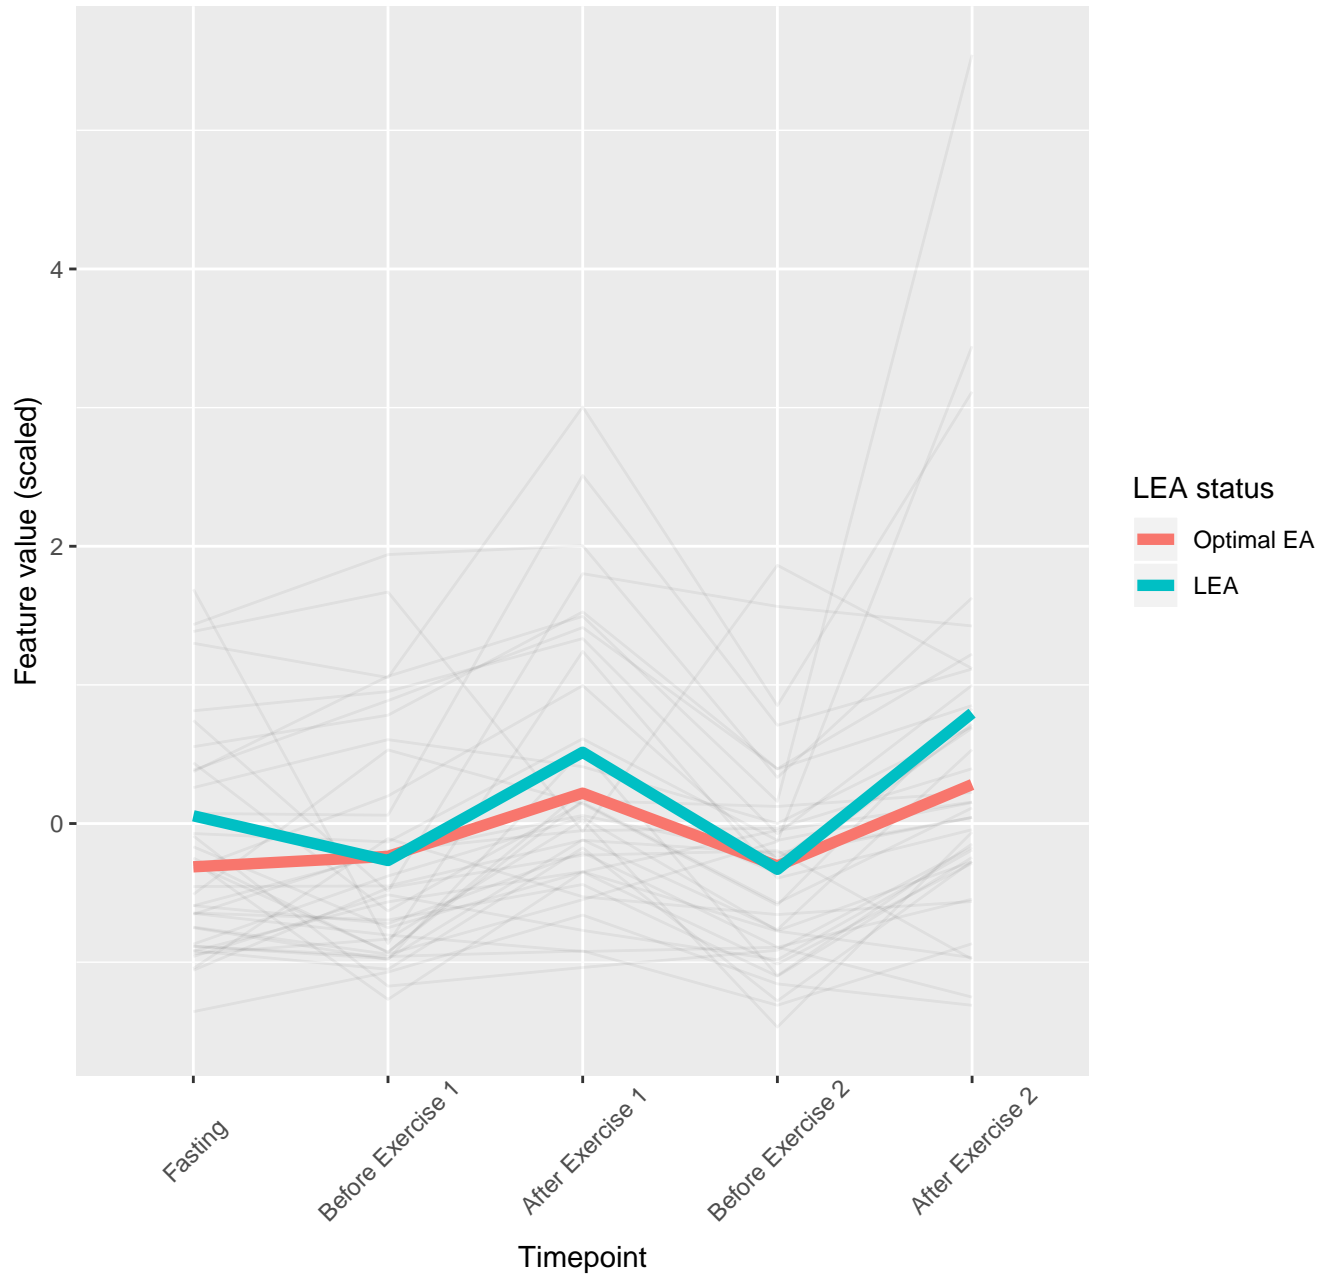

Line plot of SM(d18:0/14:0)

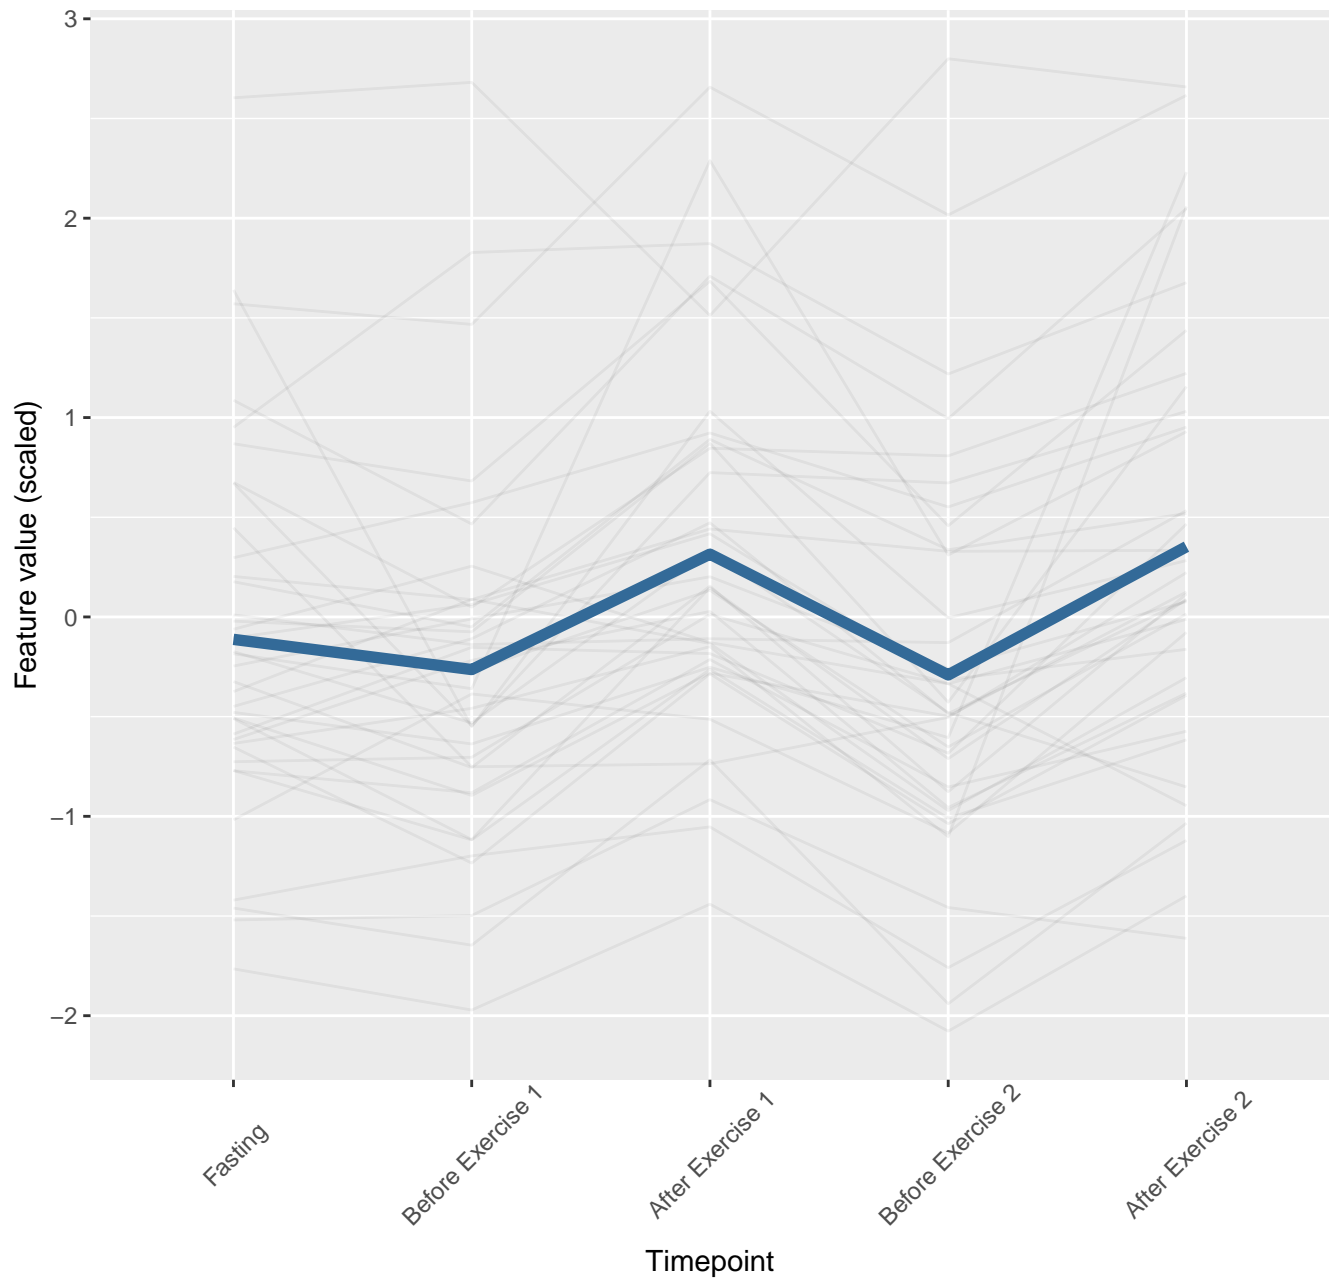

Line plot of SM(d18:0/14:0)

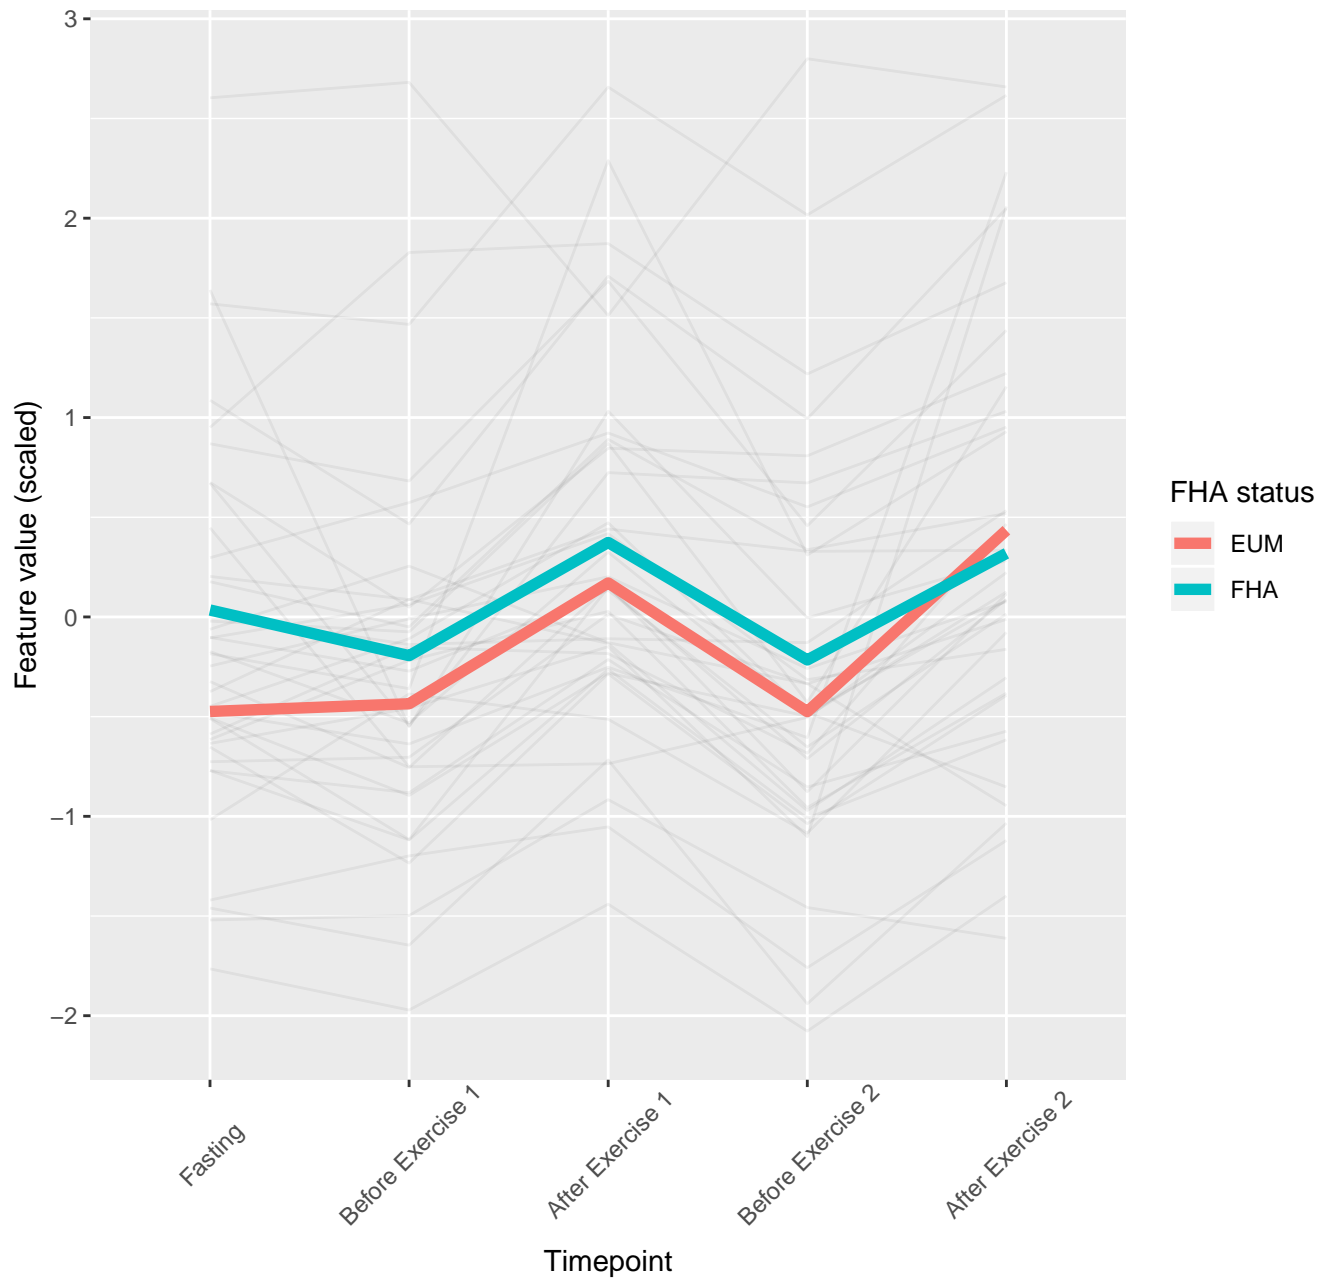

Line plot of SM(d18:0/14:0)

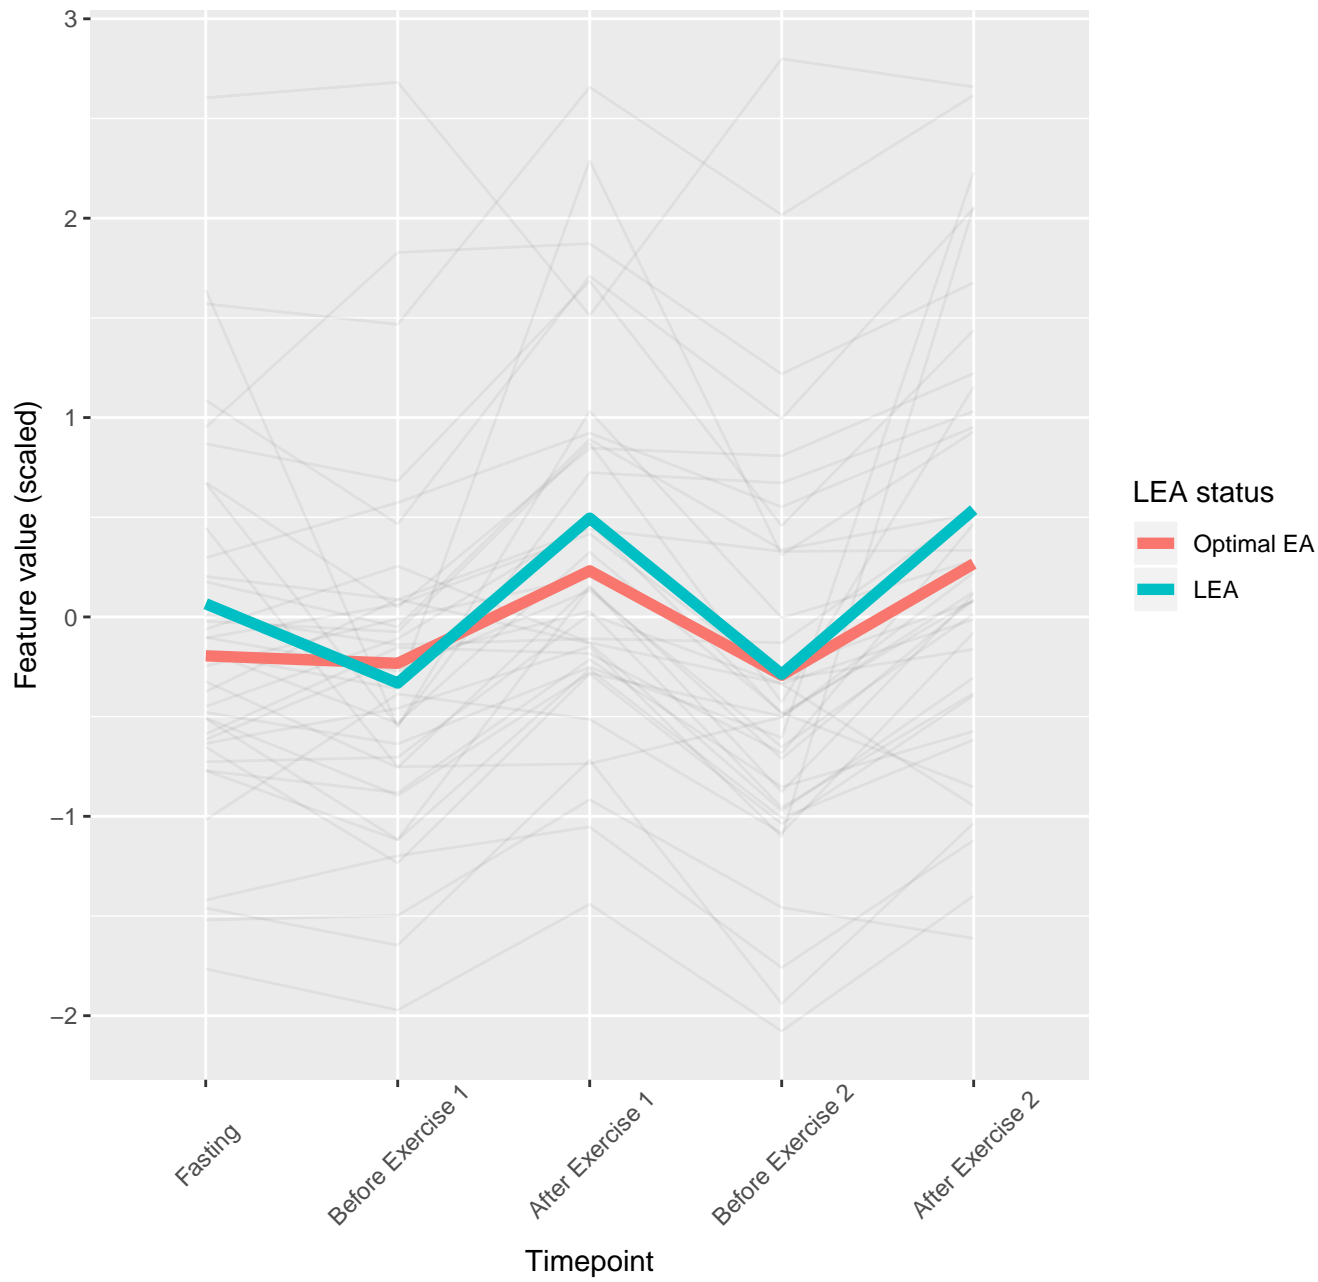

Line plot of SM(d18:1/12:0)

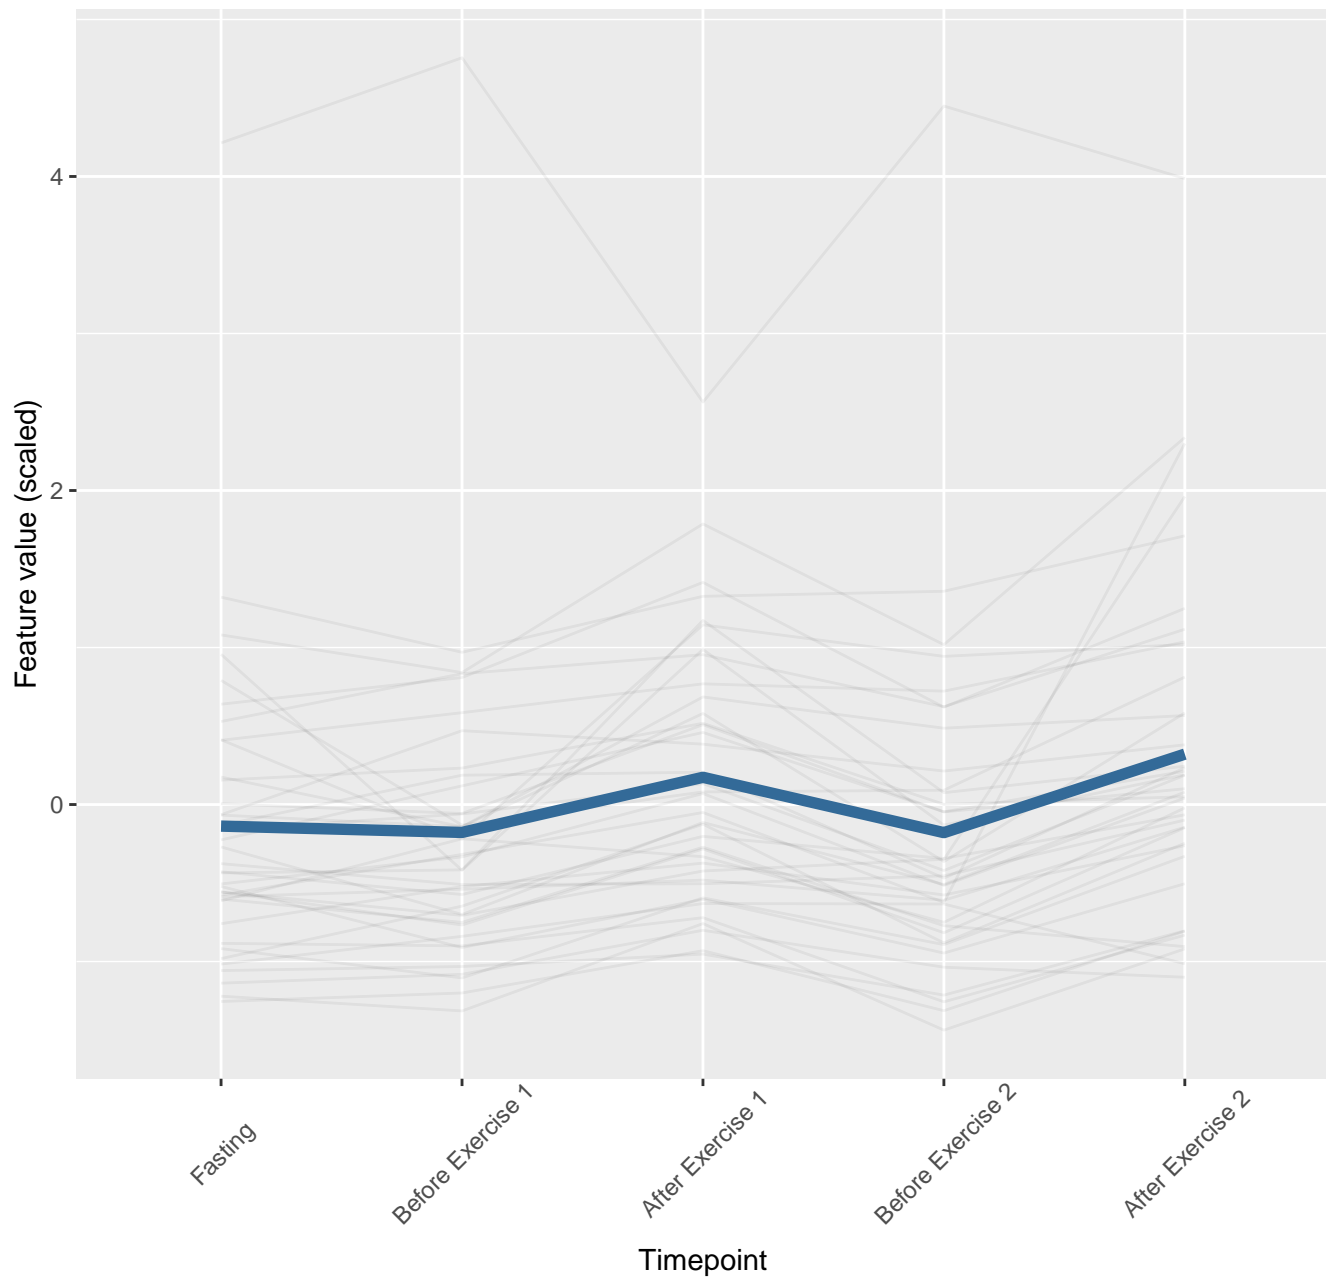

Line plot of SM(d18:1/12:0)

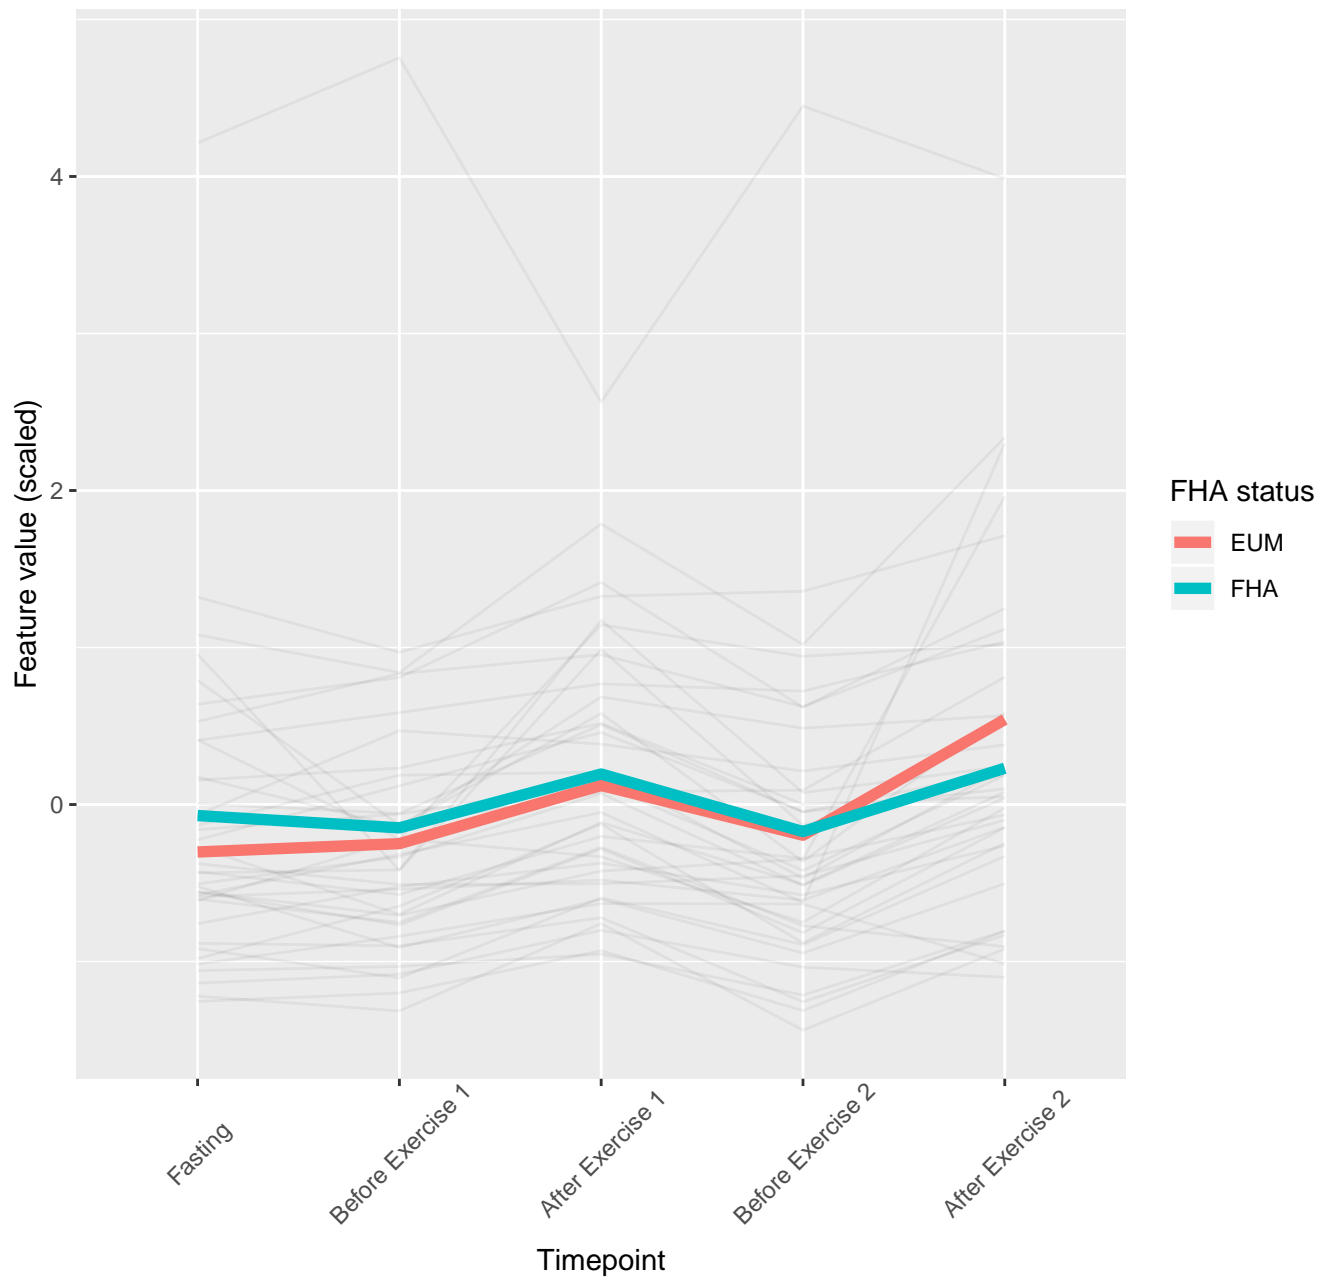

Line plot of SM(d18:1/12:0)

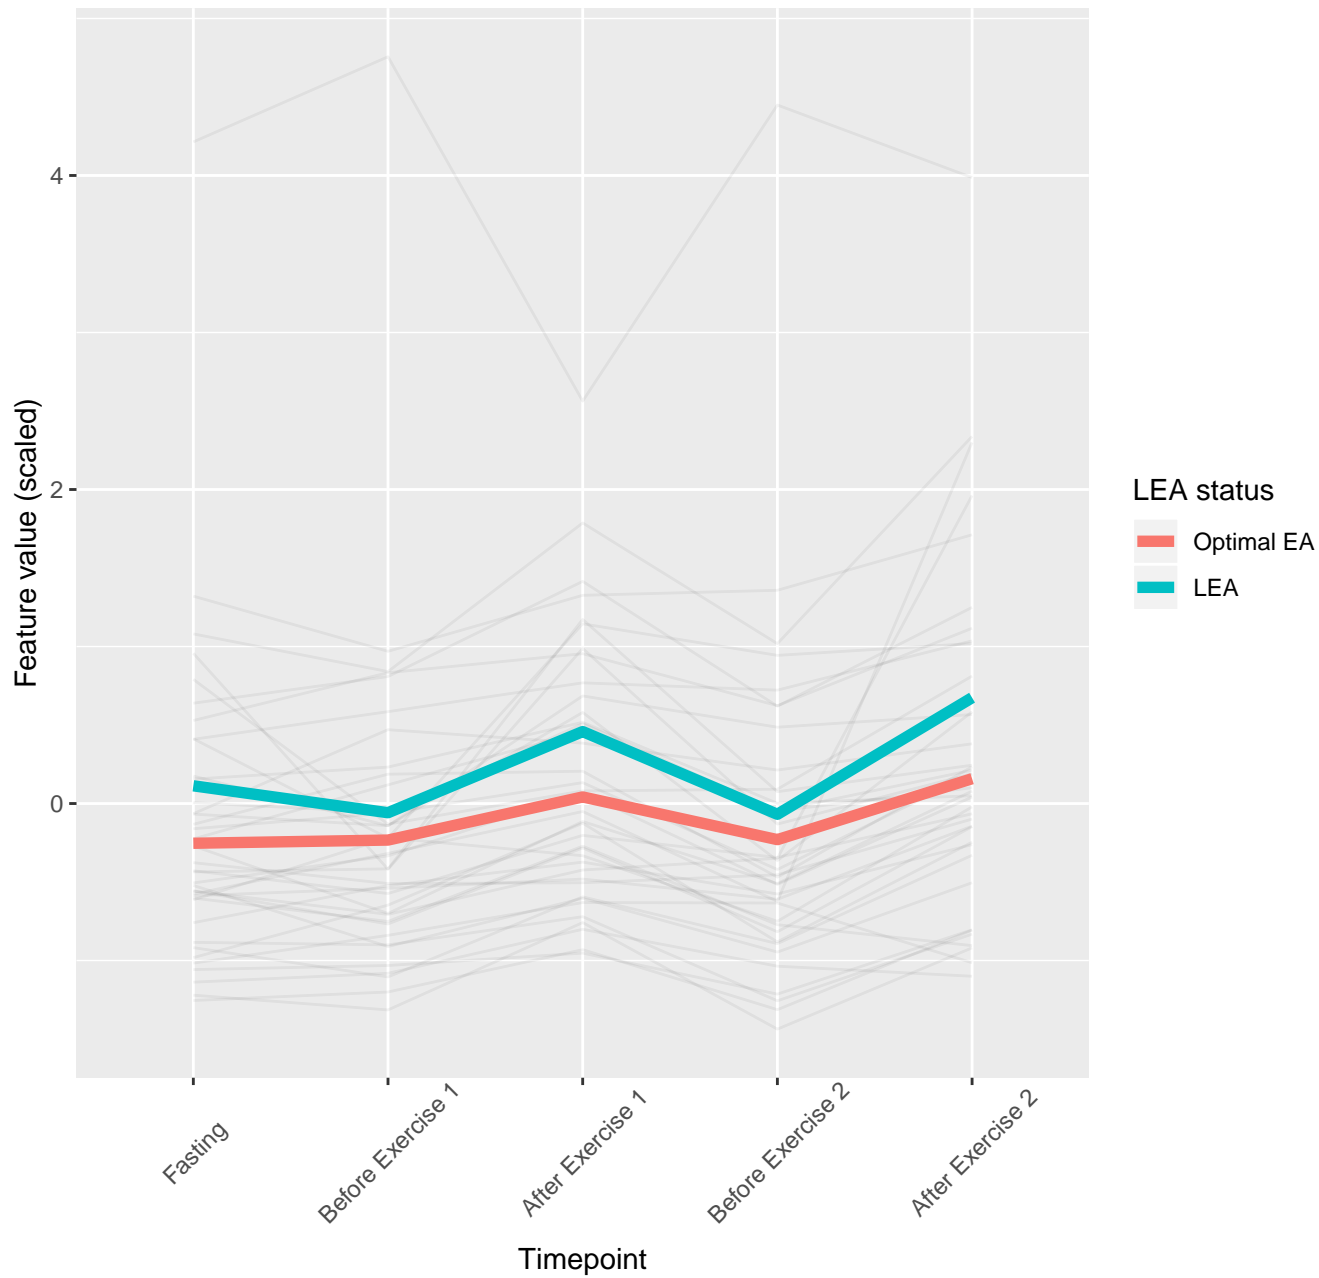

Line plot of SM(d18:1/24:0) or SM(d18:0/24:1)

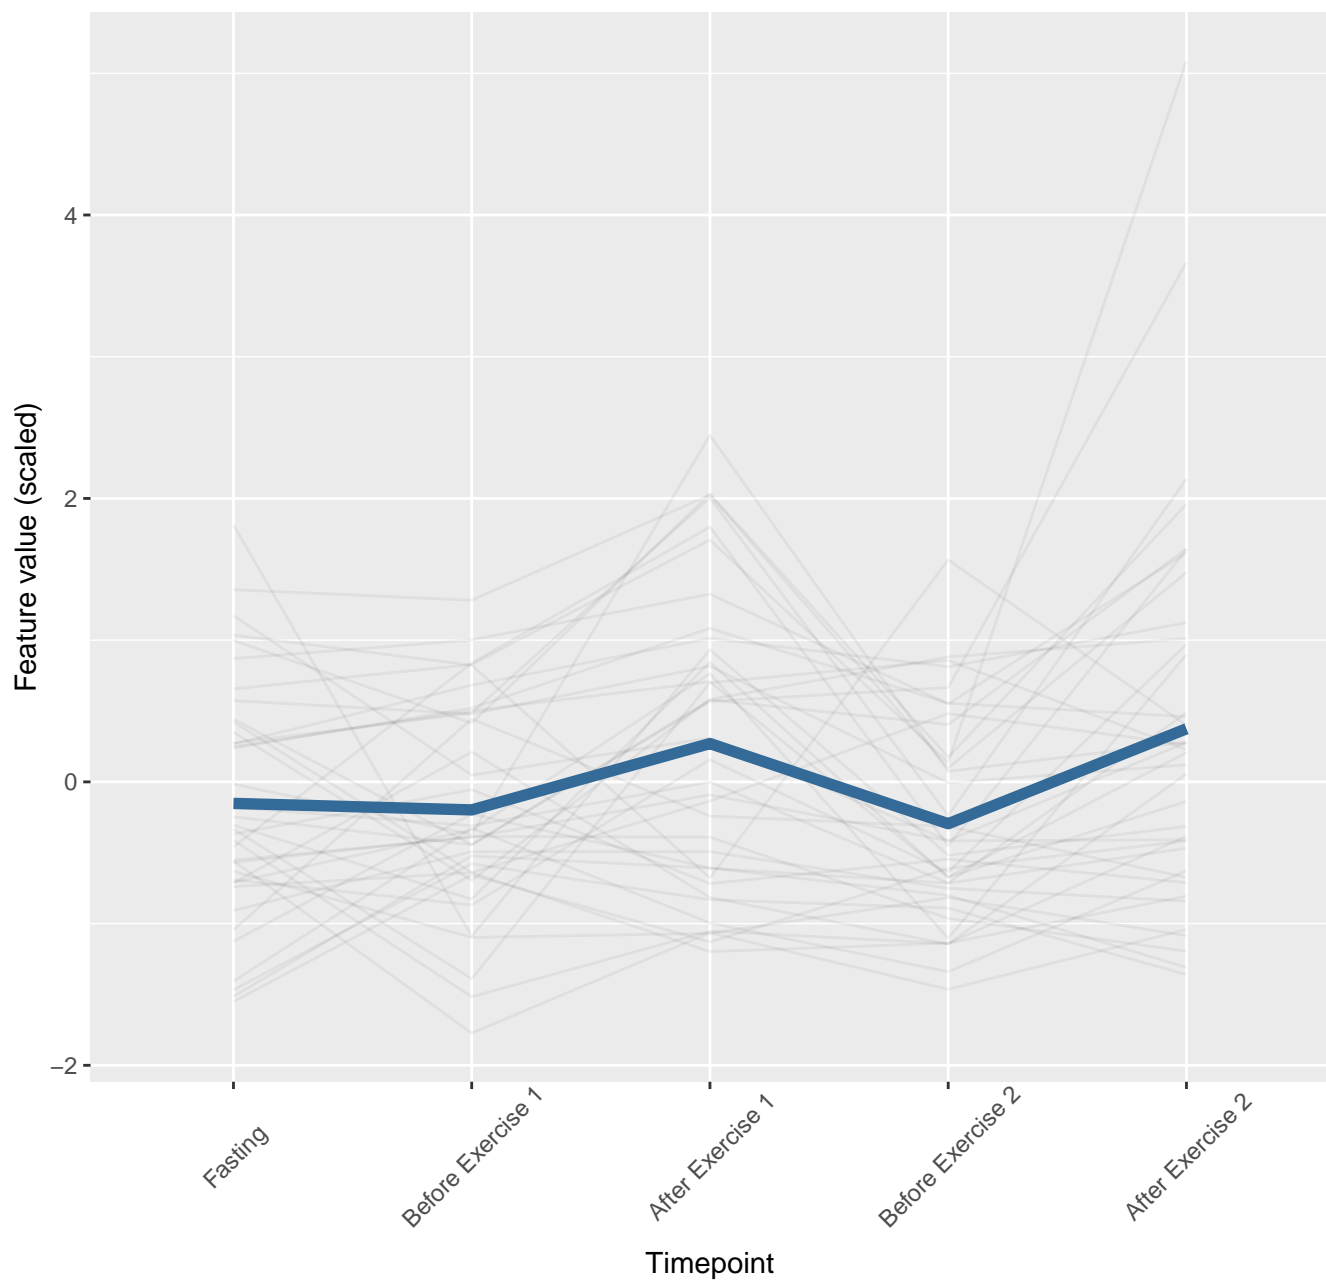



Line plot of SM(d18:1/24:0) or SM(d18:0/24:1)

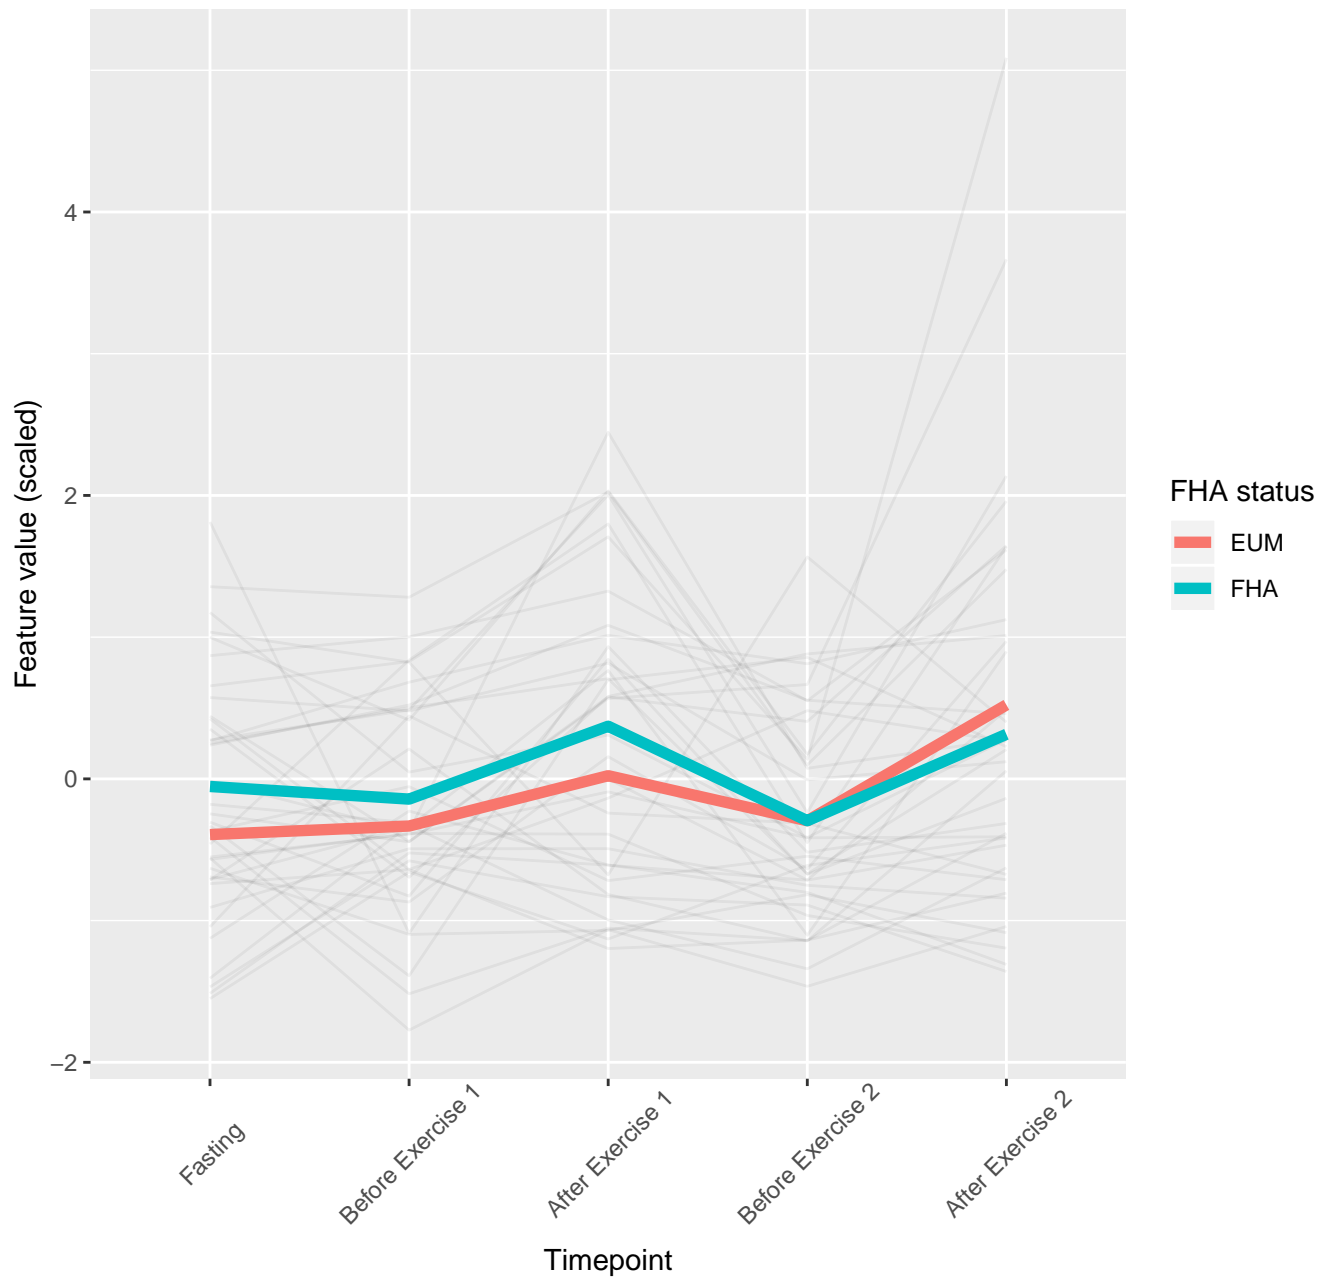

Line plot of SM(d18:1/24:0) or SM(d18:0/24:1)

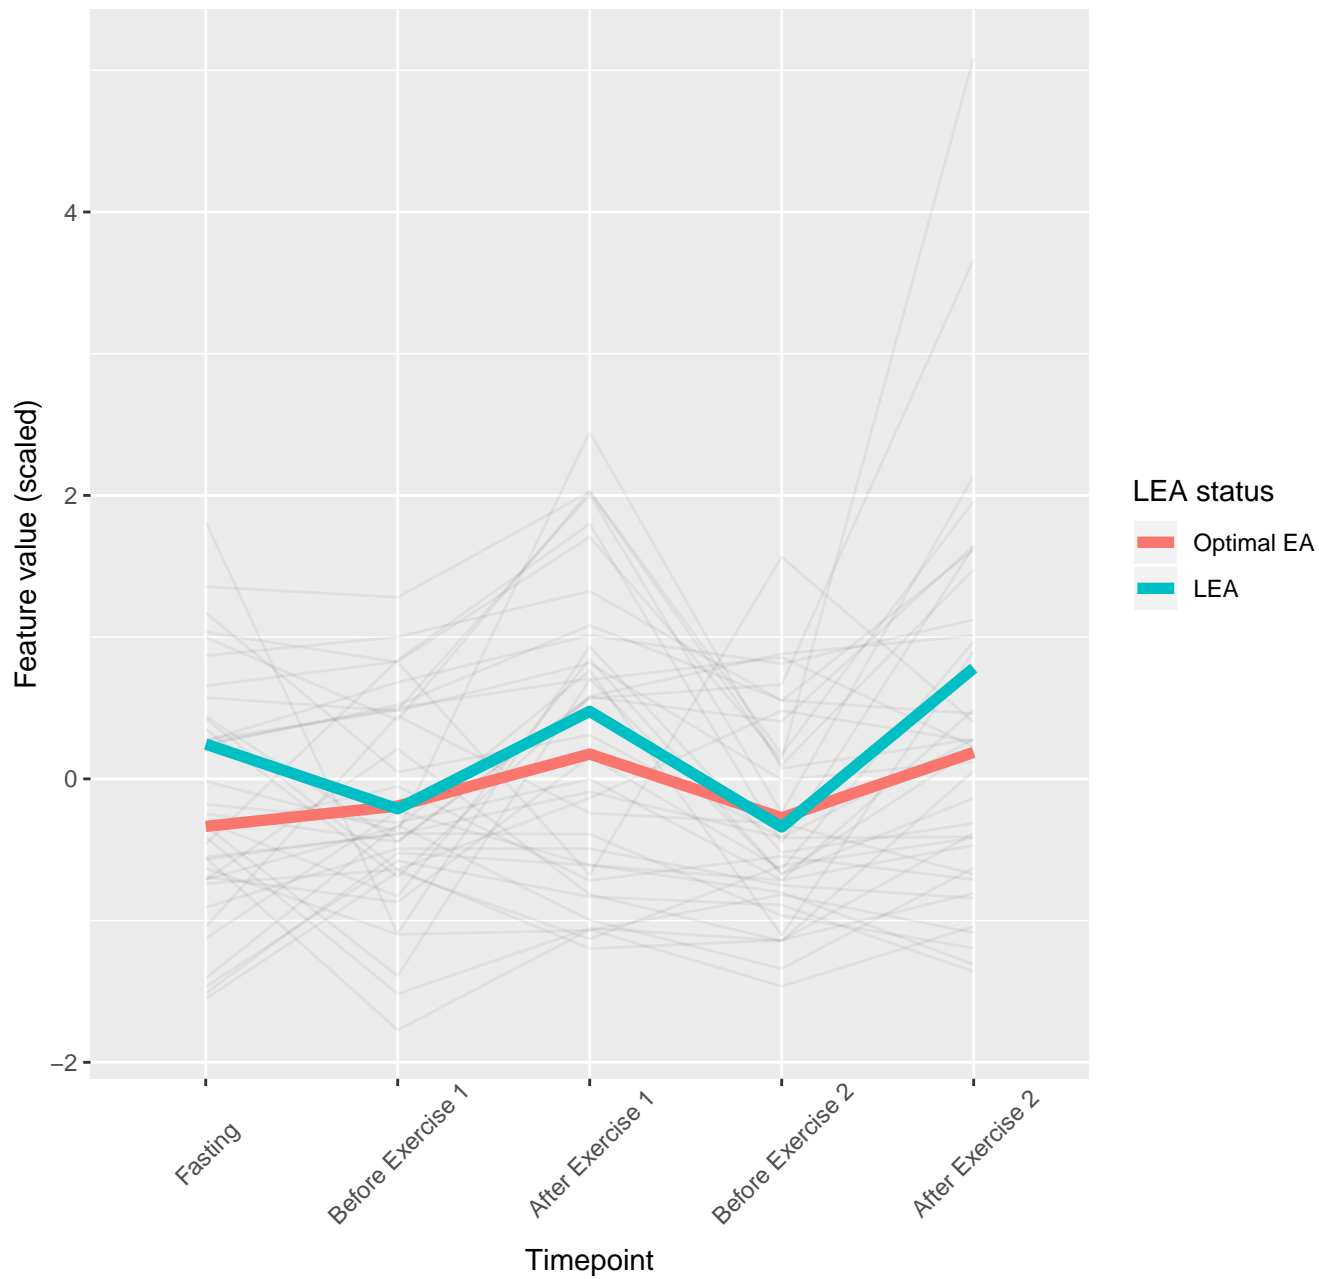

Line plot of SM(d18:1/24:0)

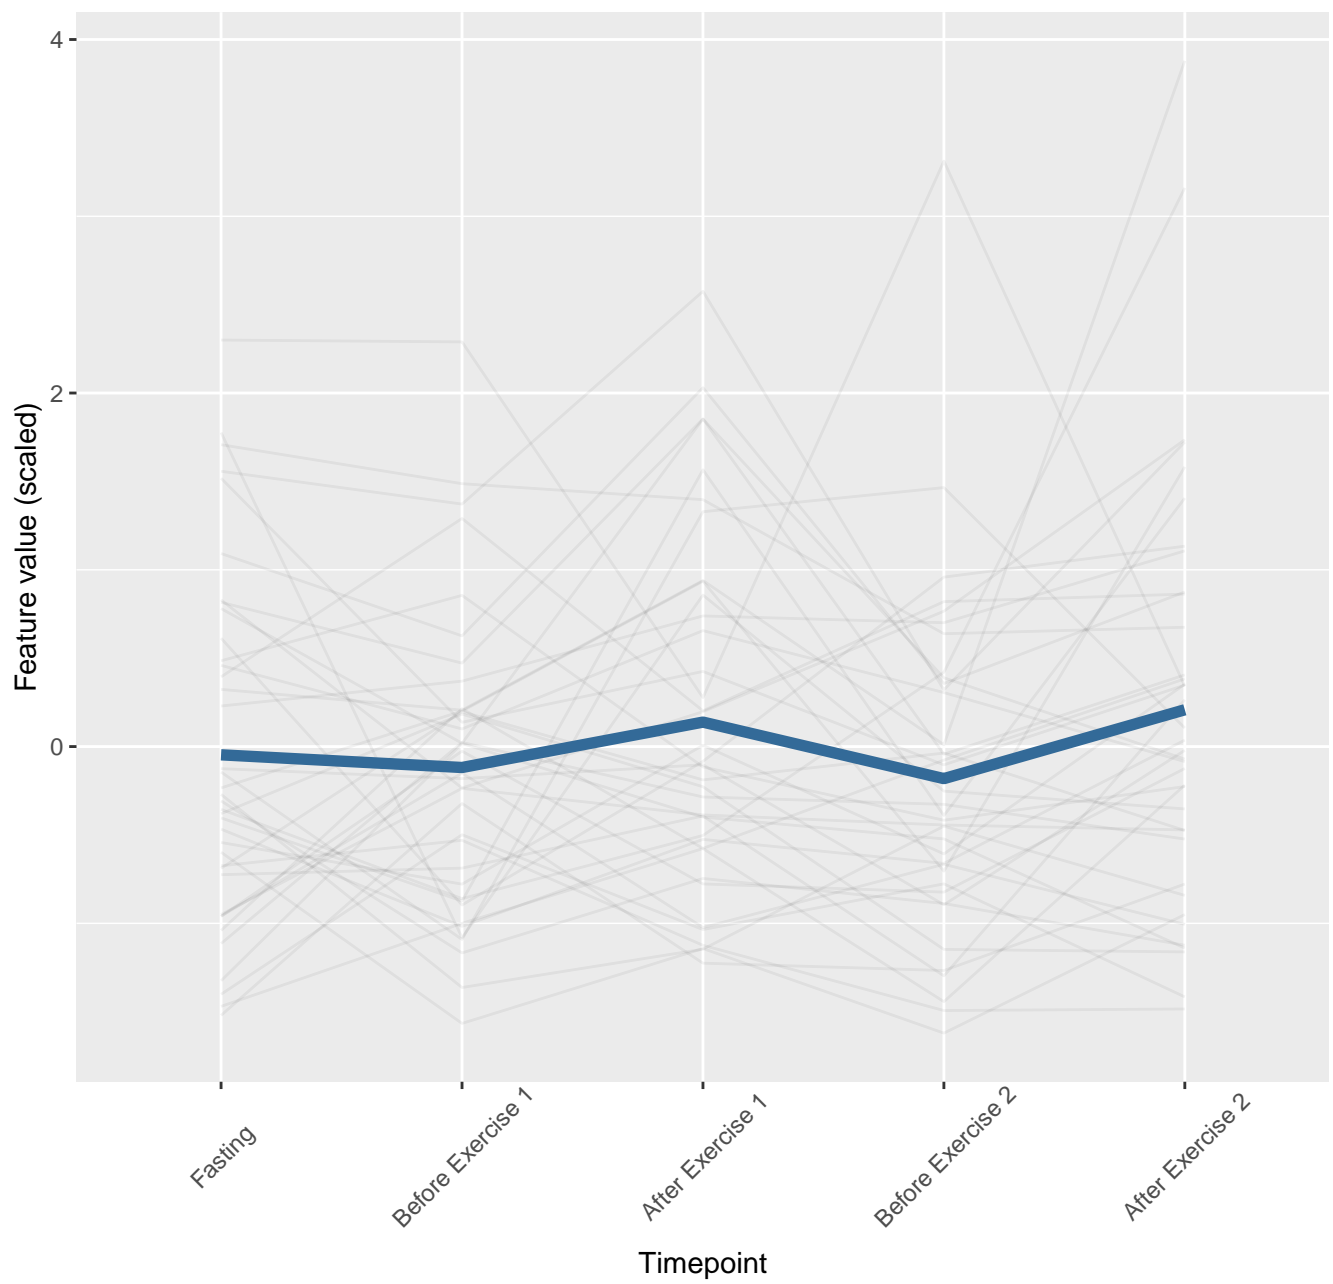

Line plot of SM(d18:1/24:0)

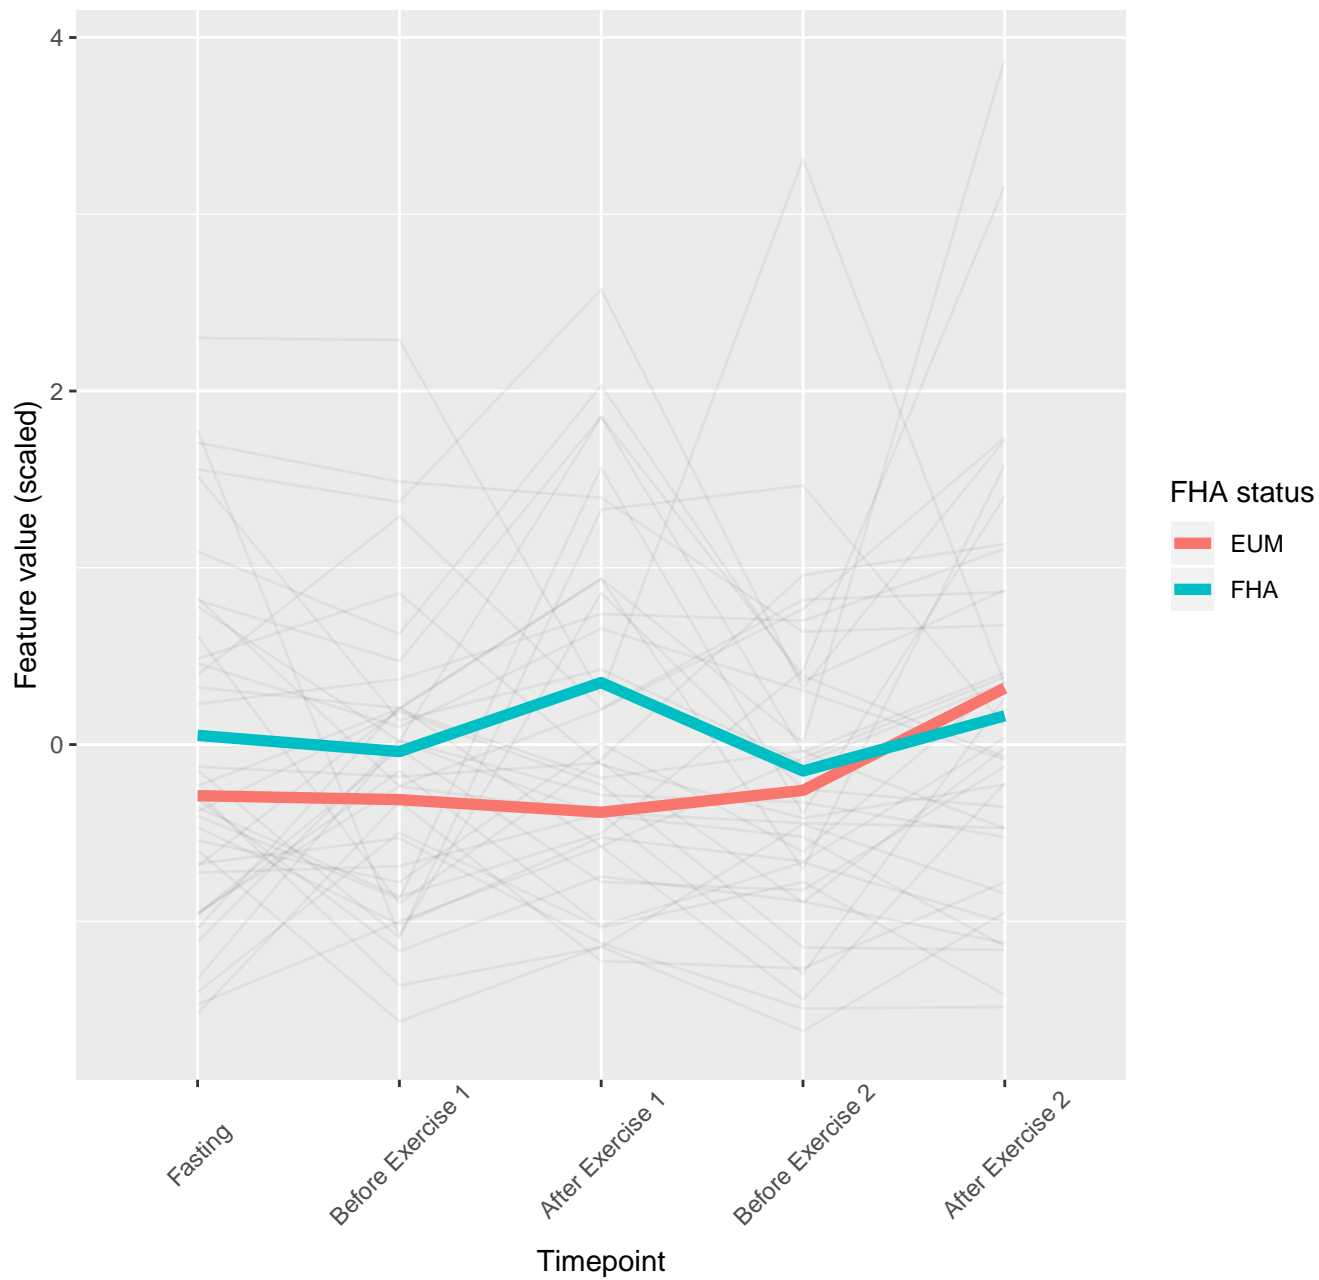

Line plot of SM(d18:1/24:0)

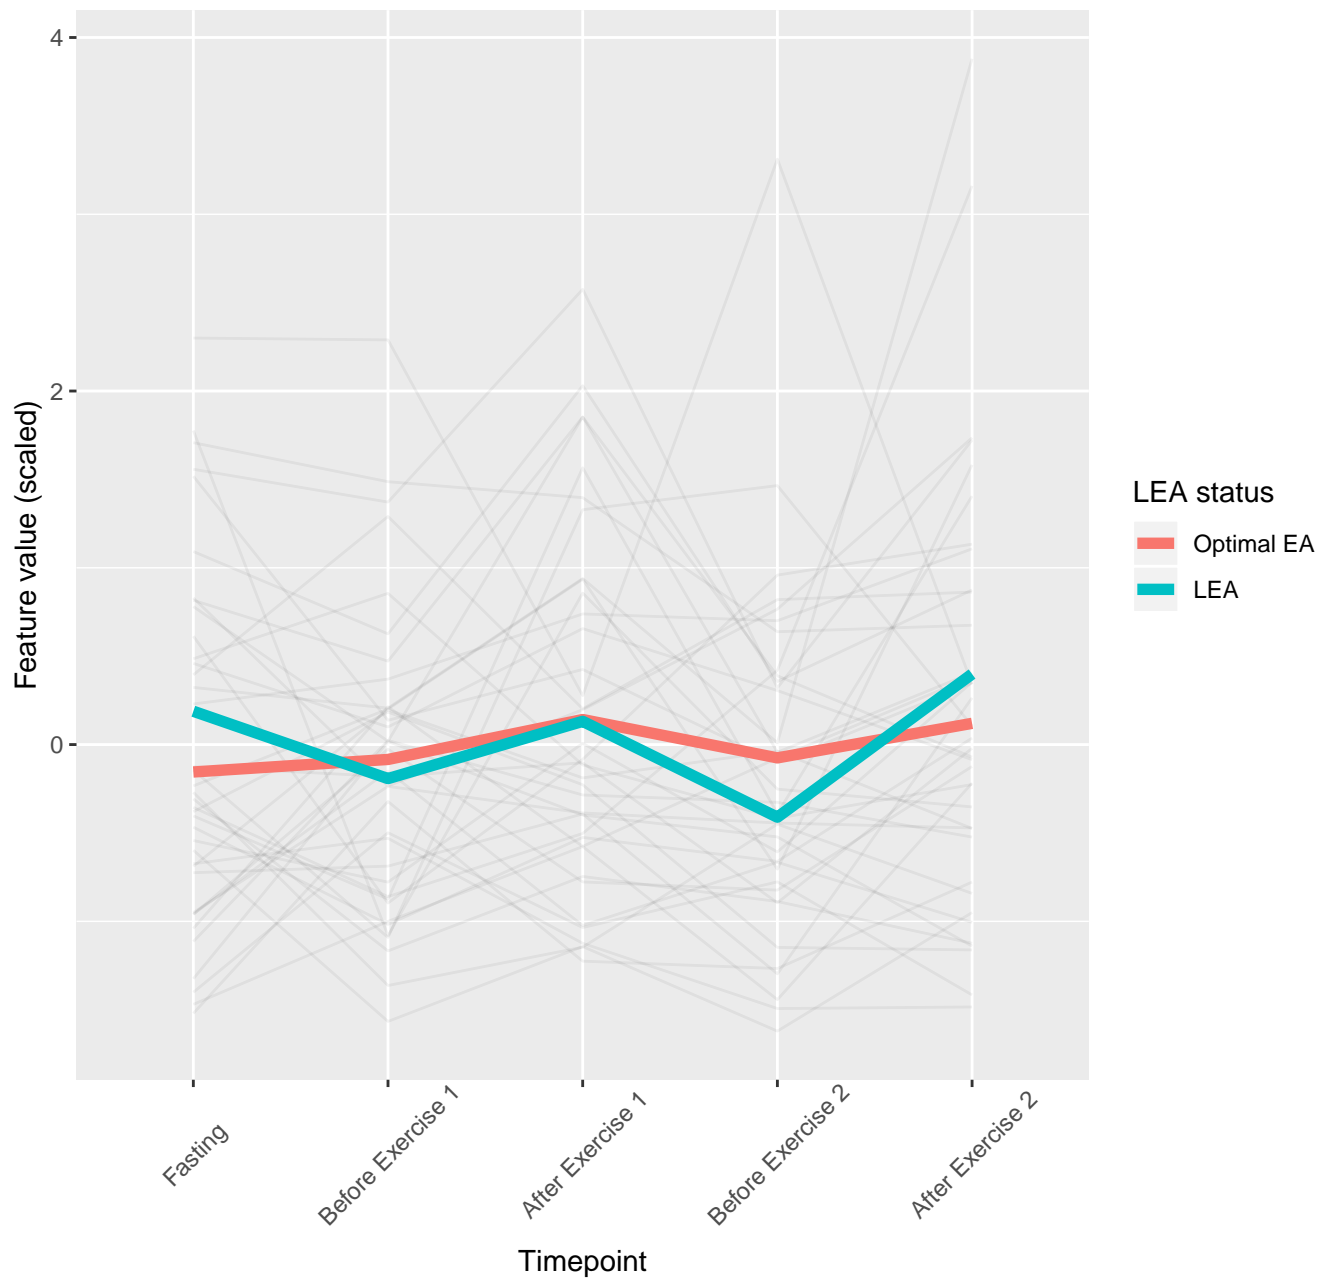

Line plot of SM(d18:1/26:1)

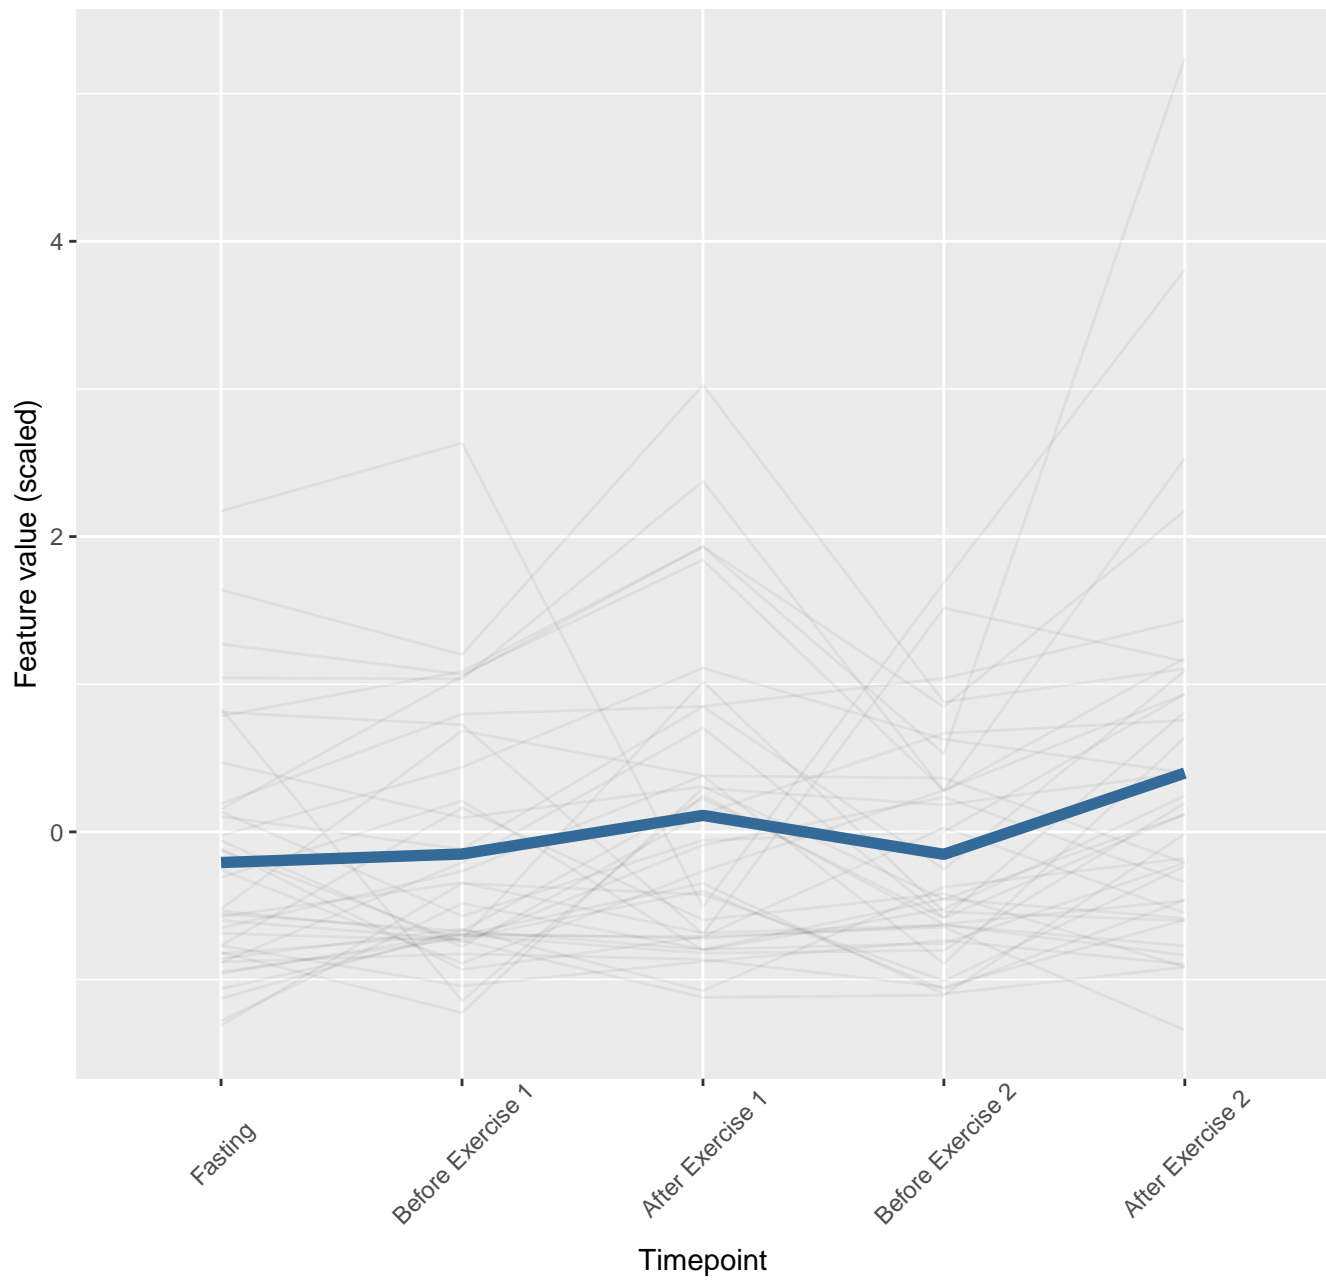

Line plot of SM(d18:1/26:1)

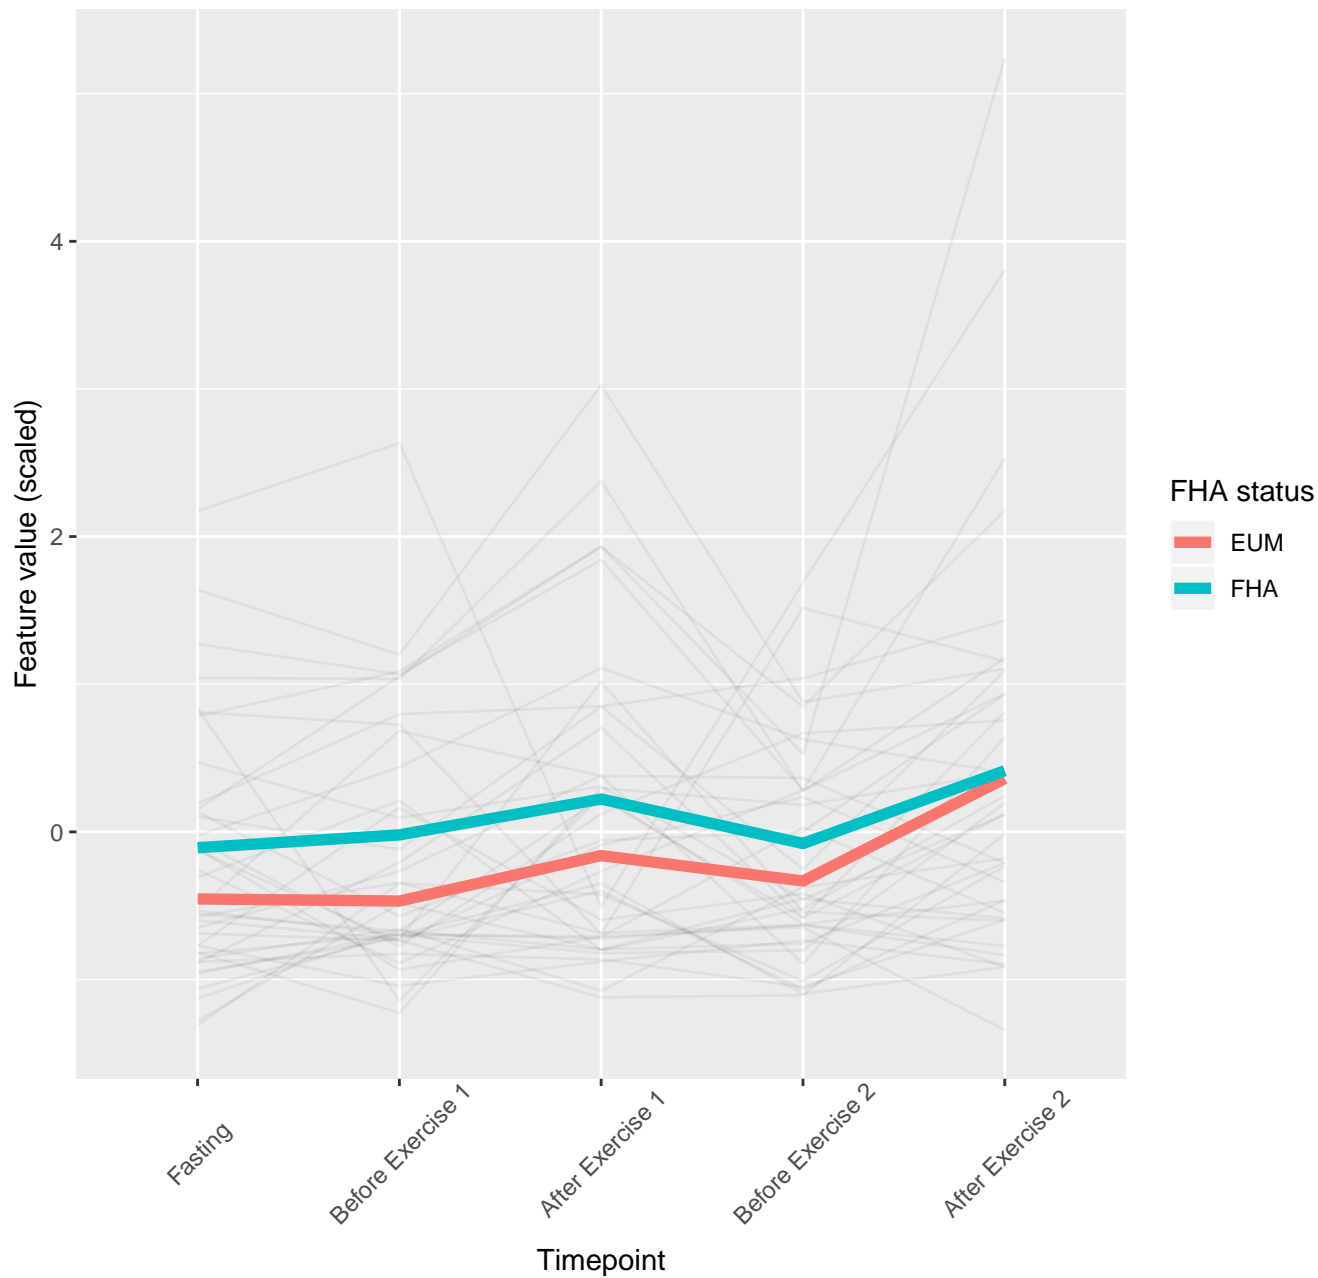

Line plot of SM(d18:1/26:1)

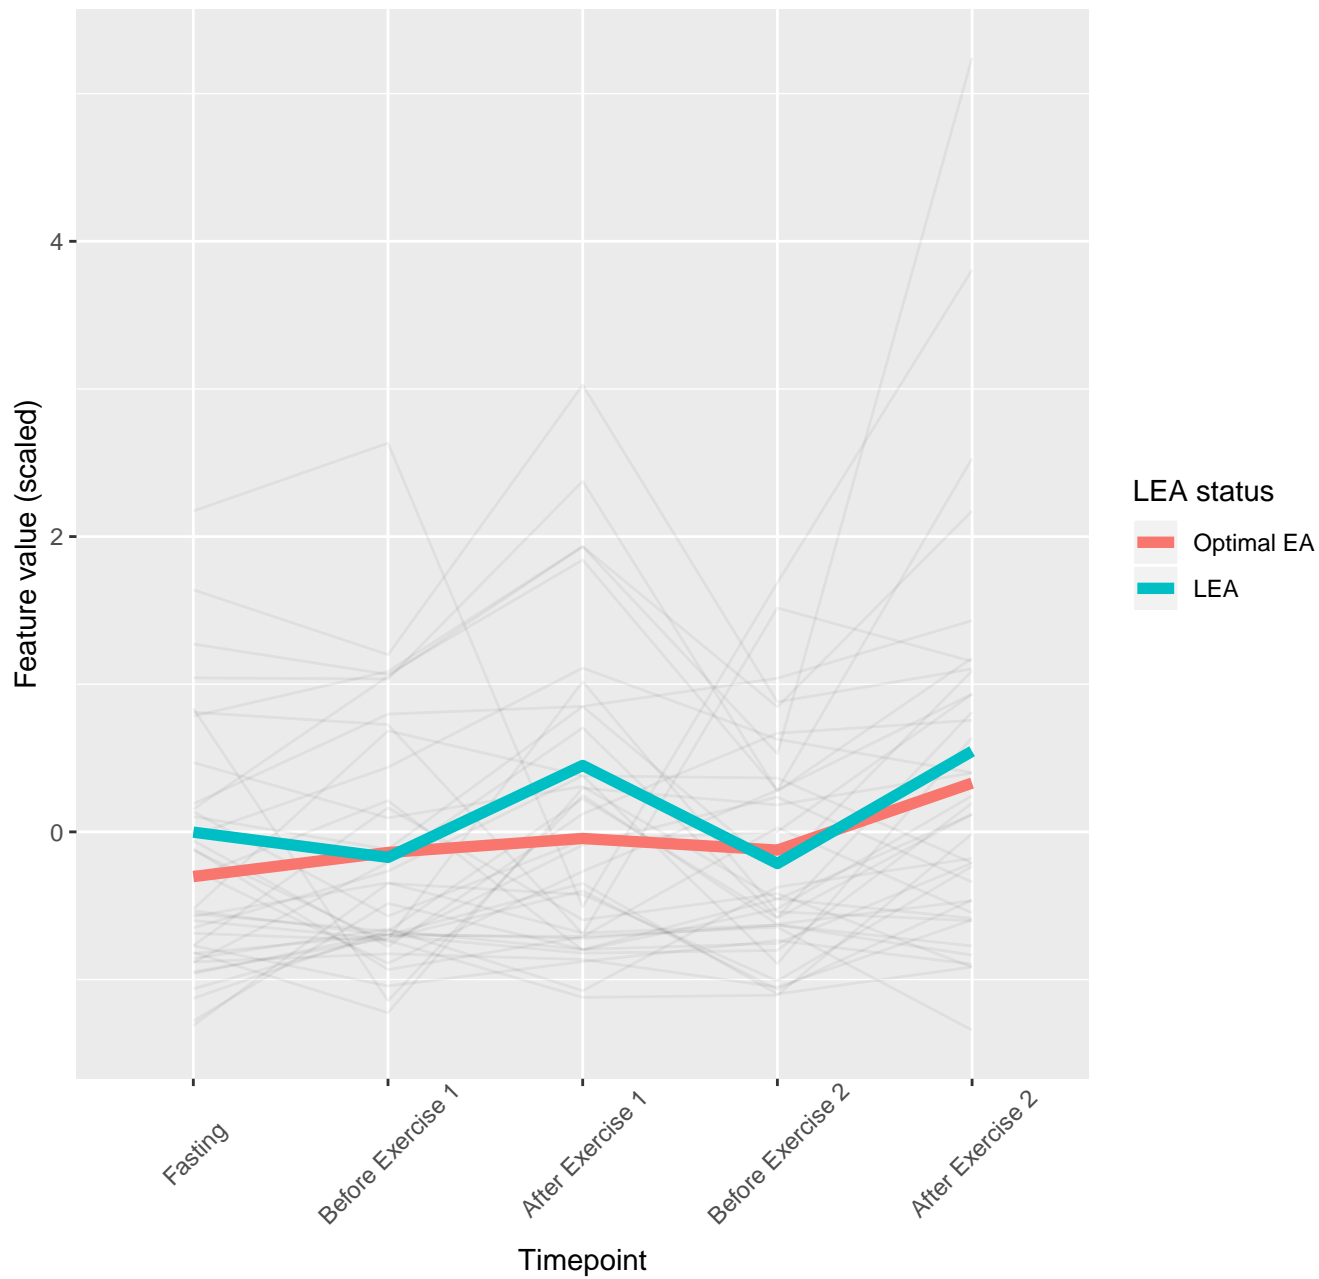



Line plot of SM(d18:2/14:0)

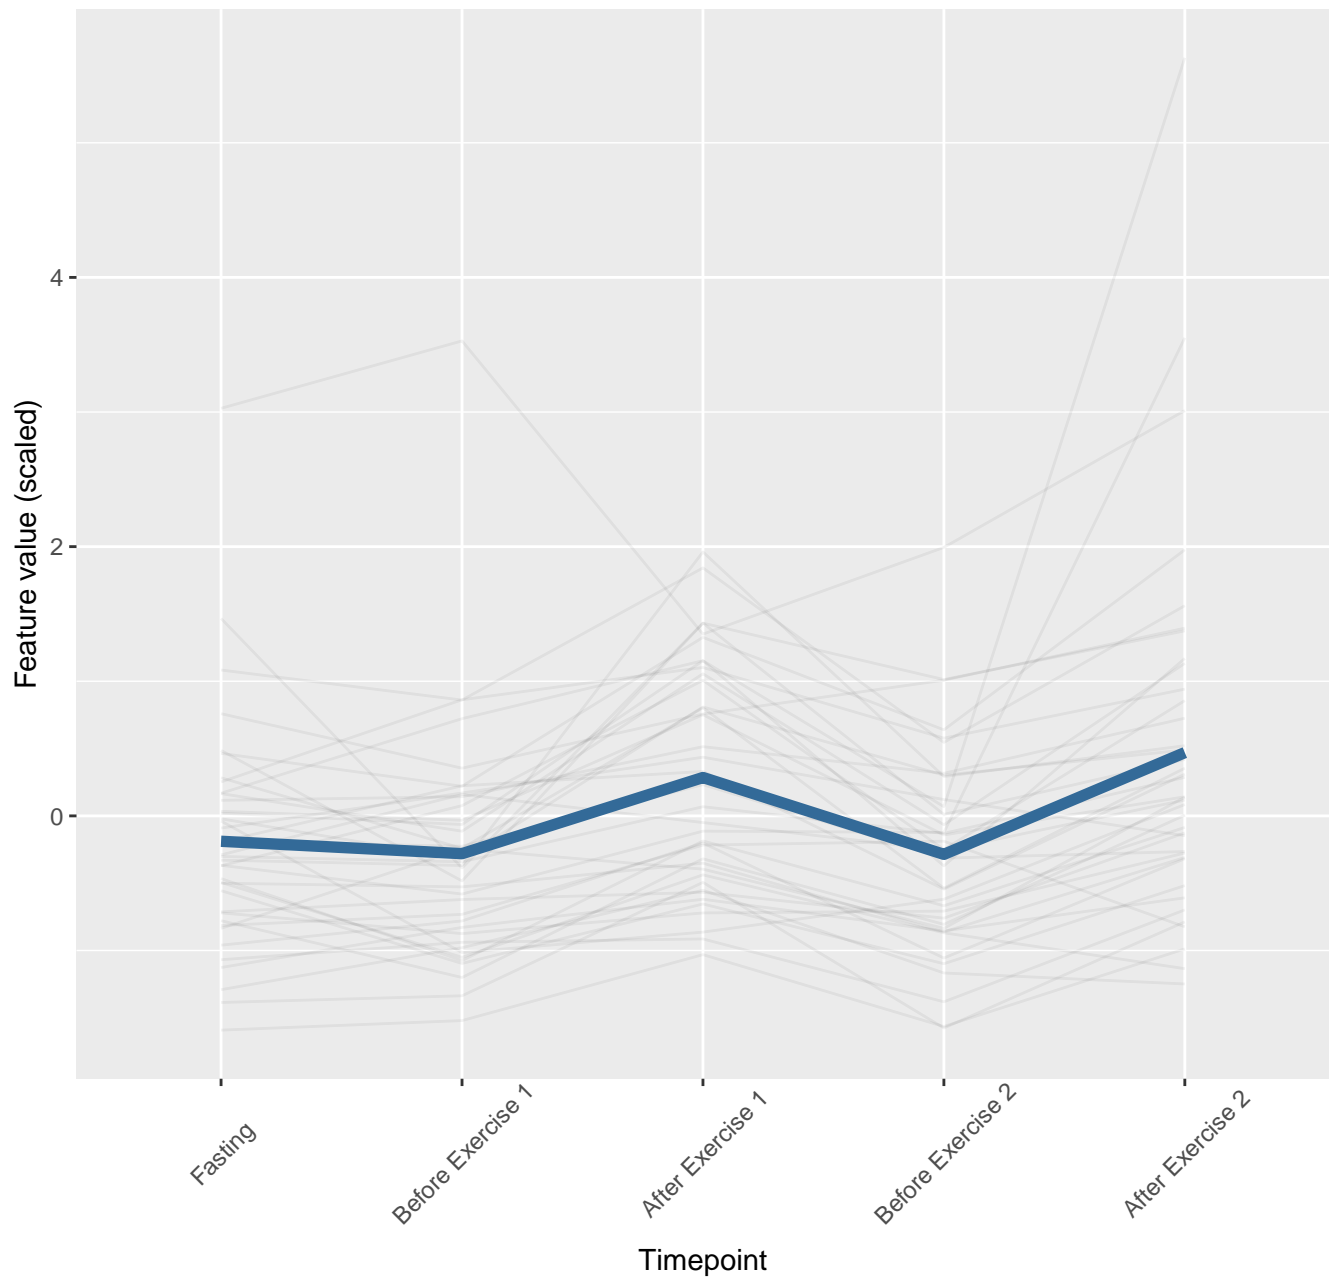

Line plot of SM(d18:2/14:0)

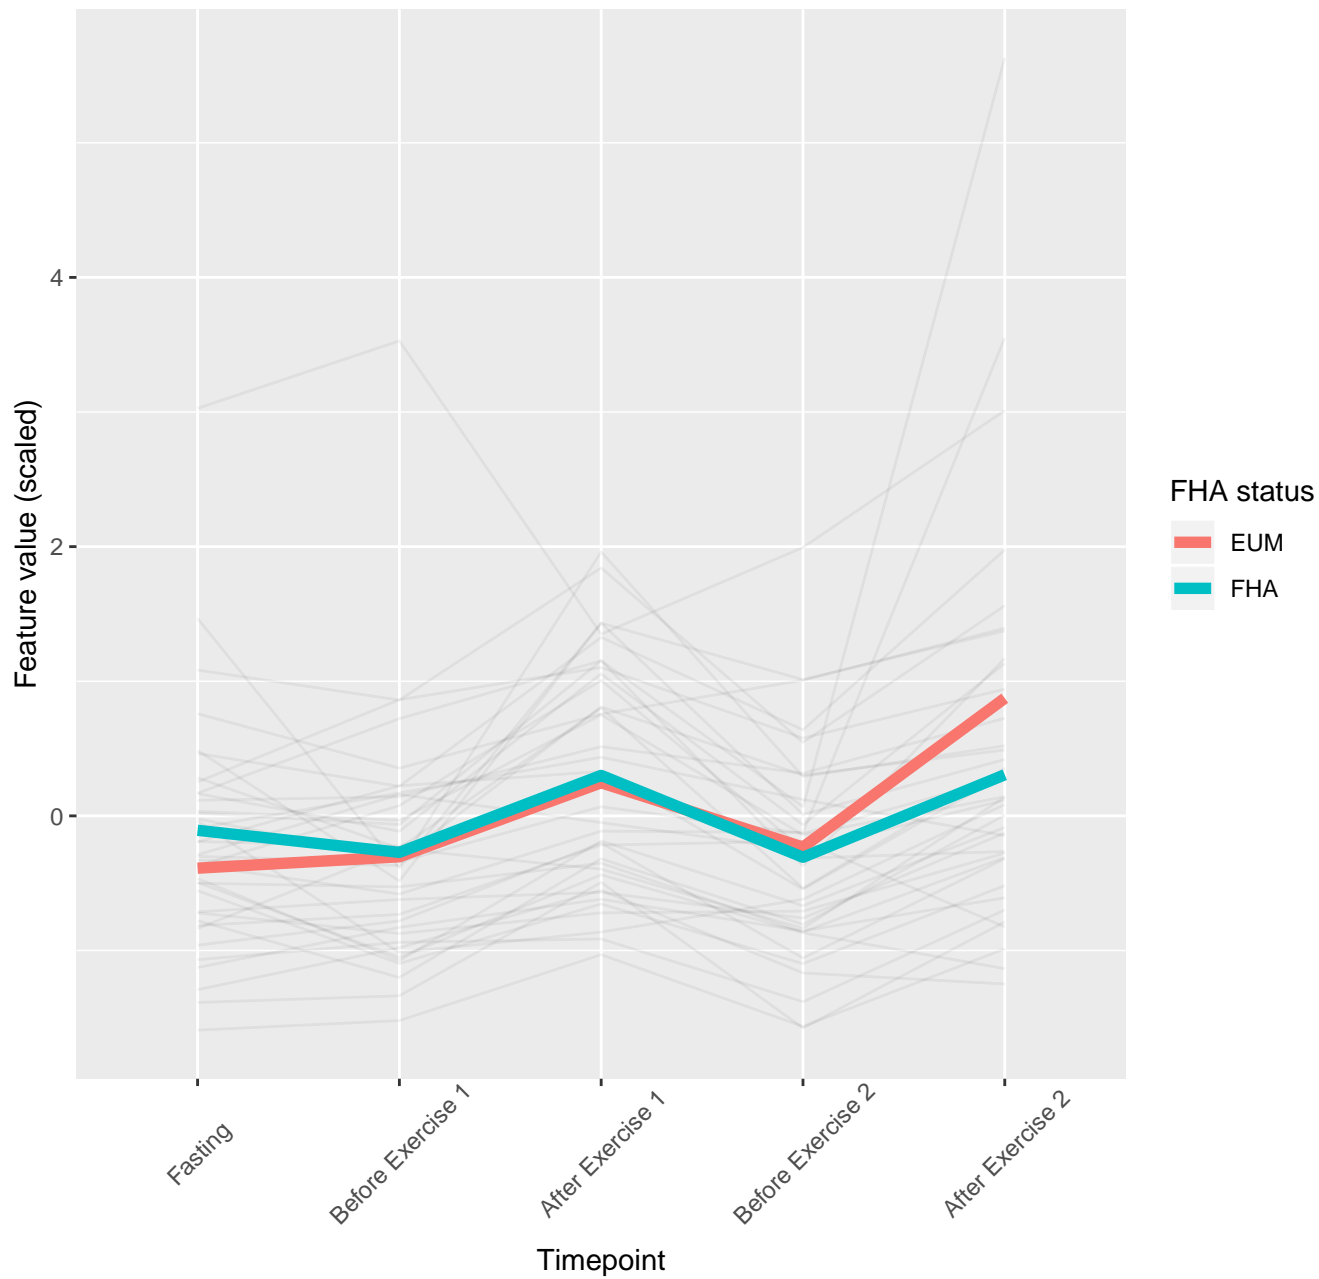

Line plot of SM(d18:2/14:0)

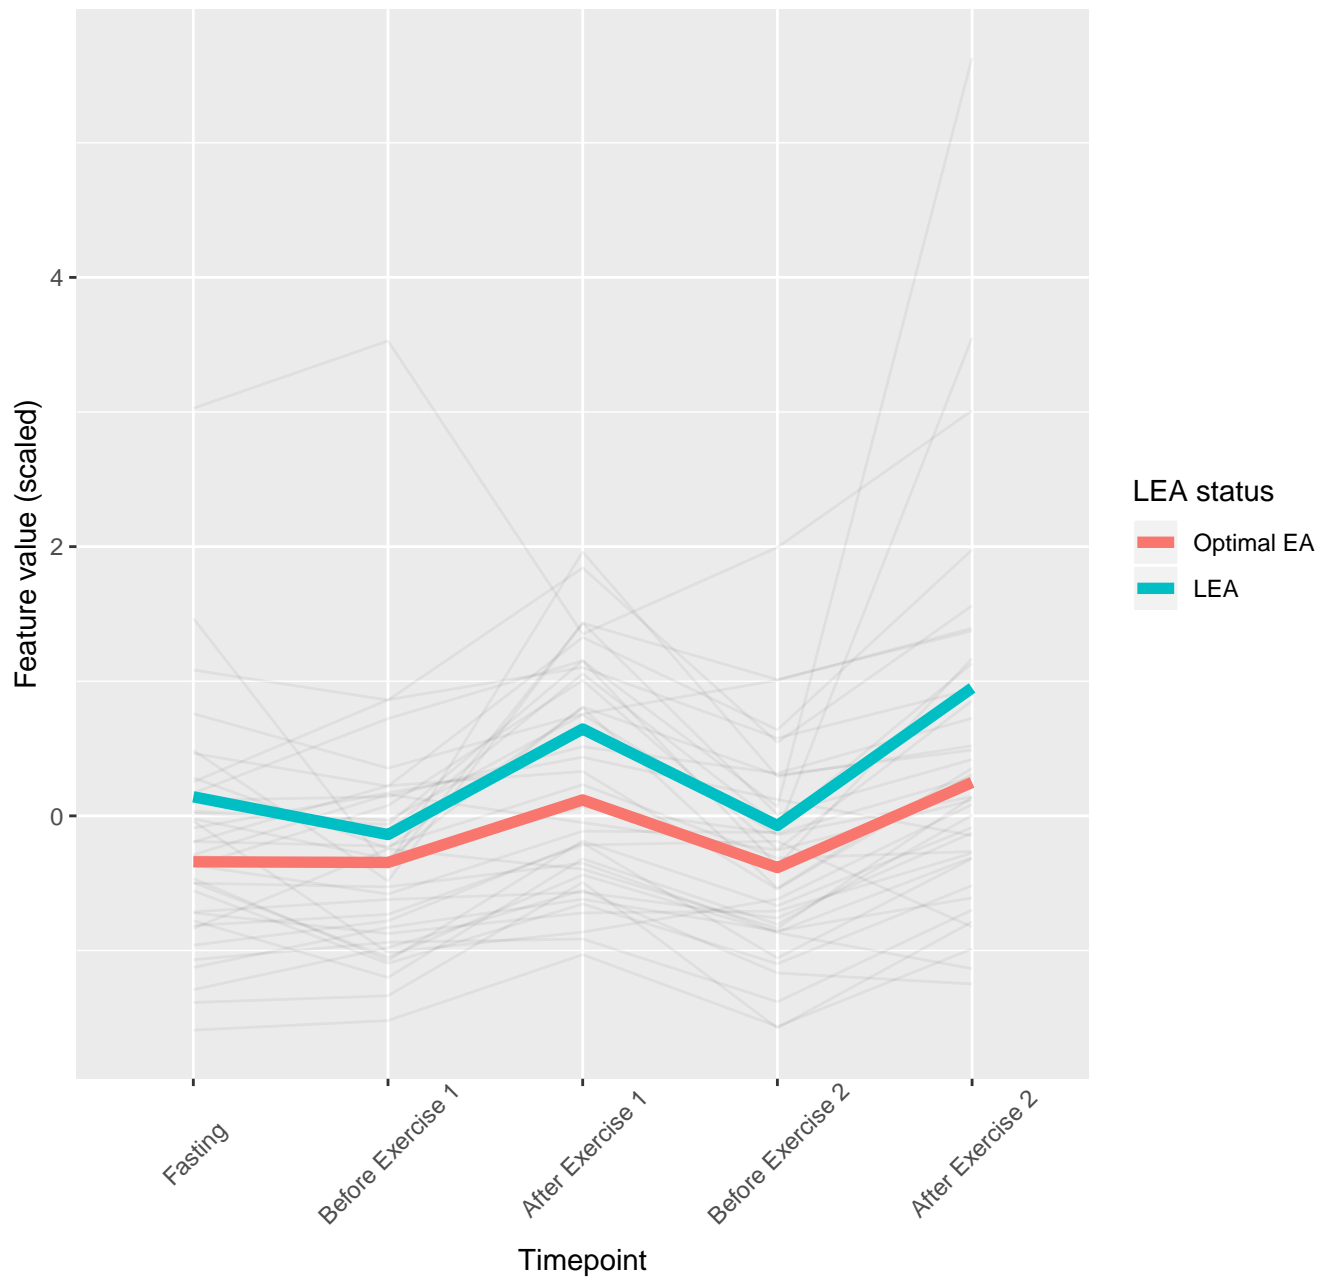

Line plot of SM(d18:2/18:1)

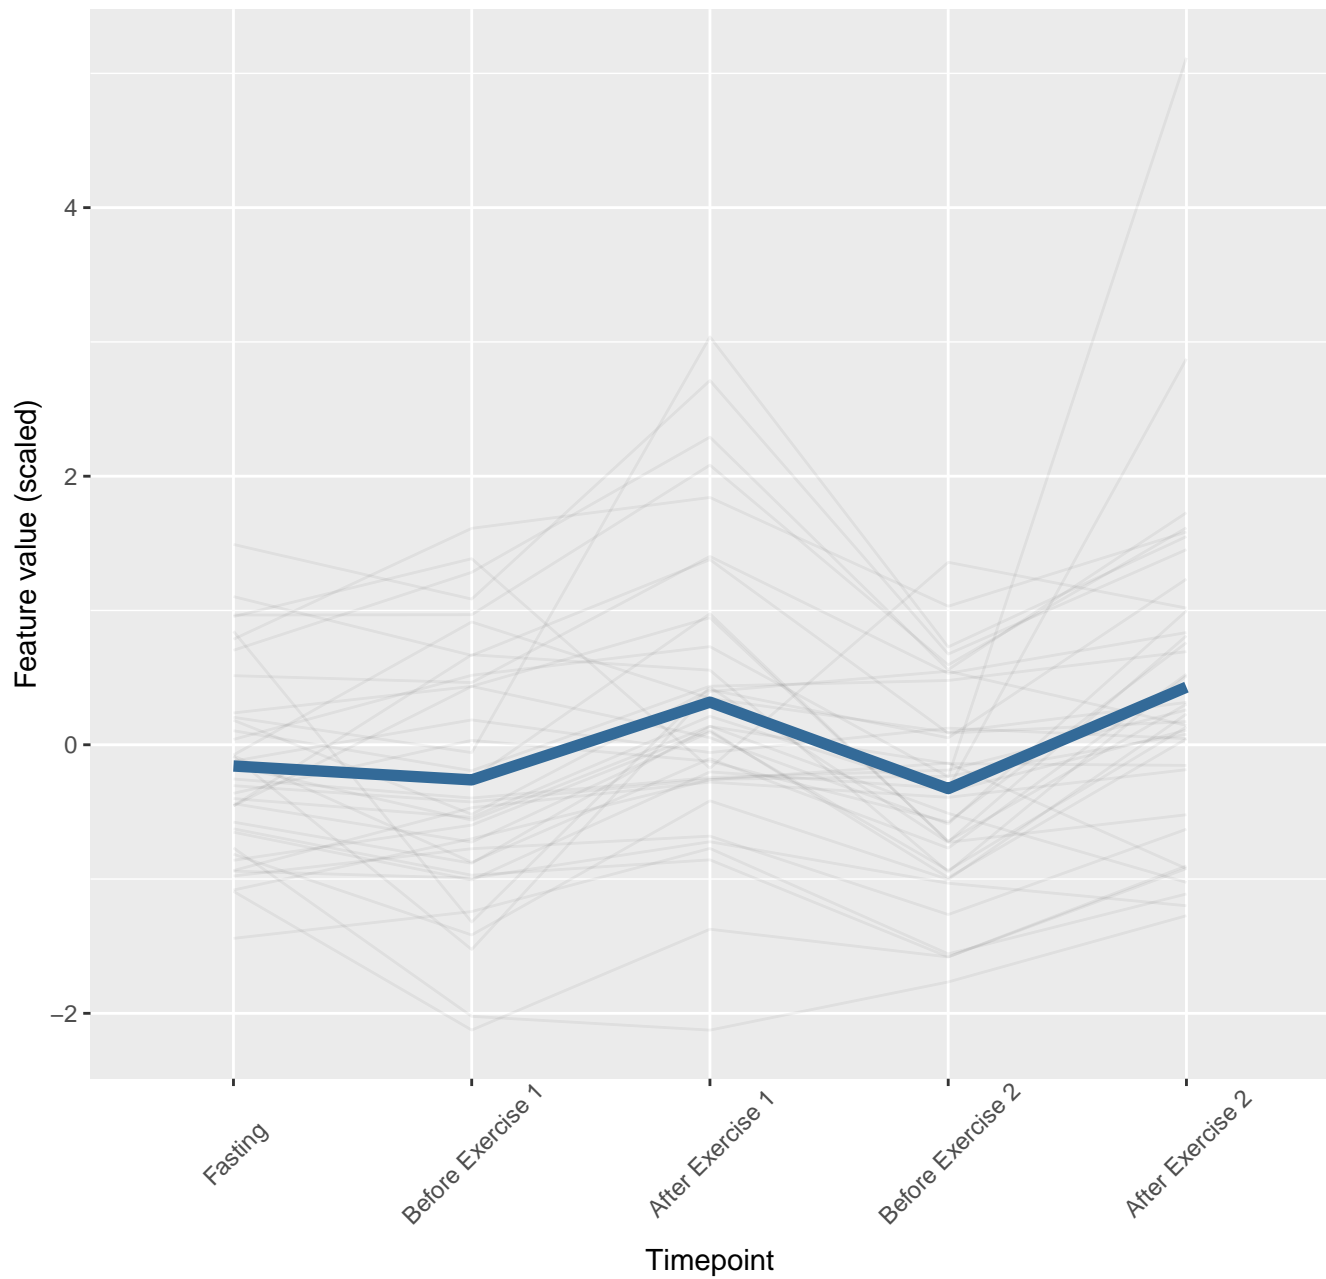

Line plot of SM(d18:2/18:1)

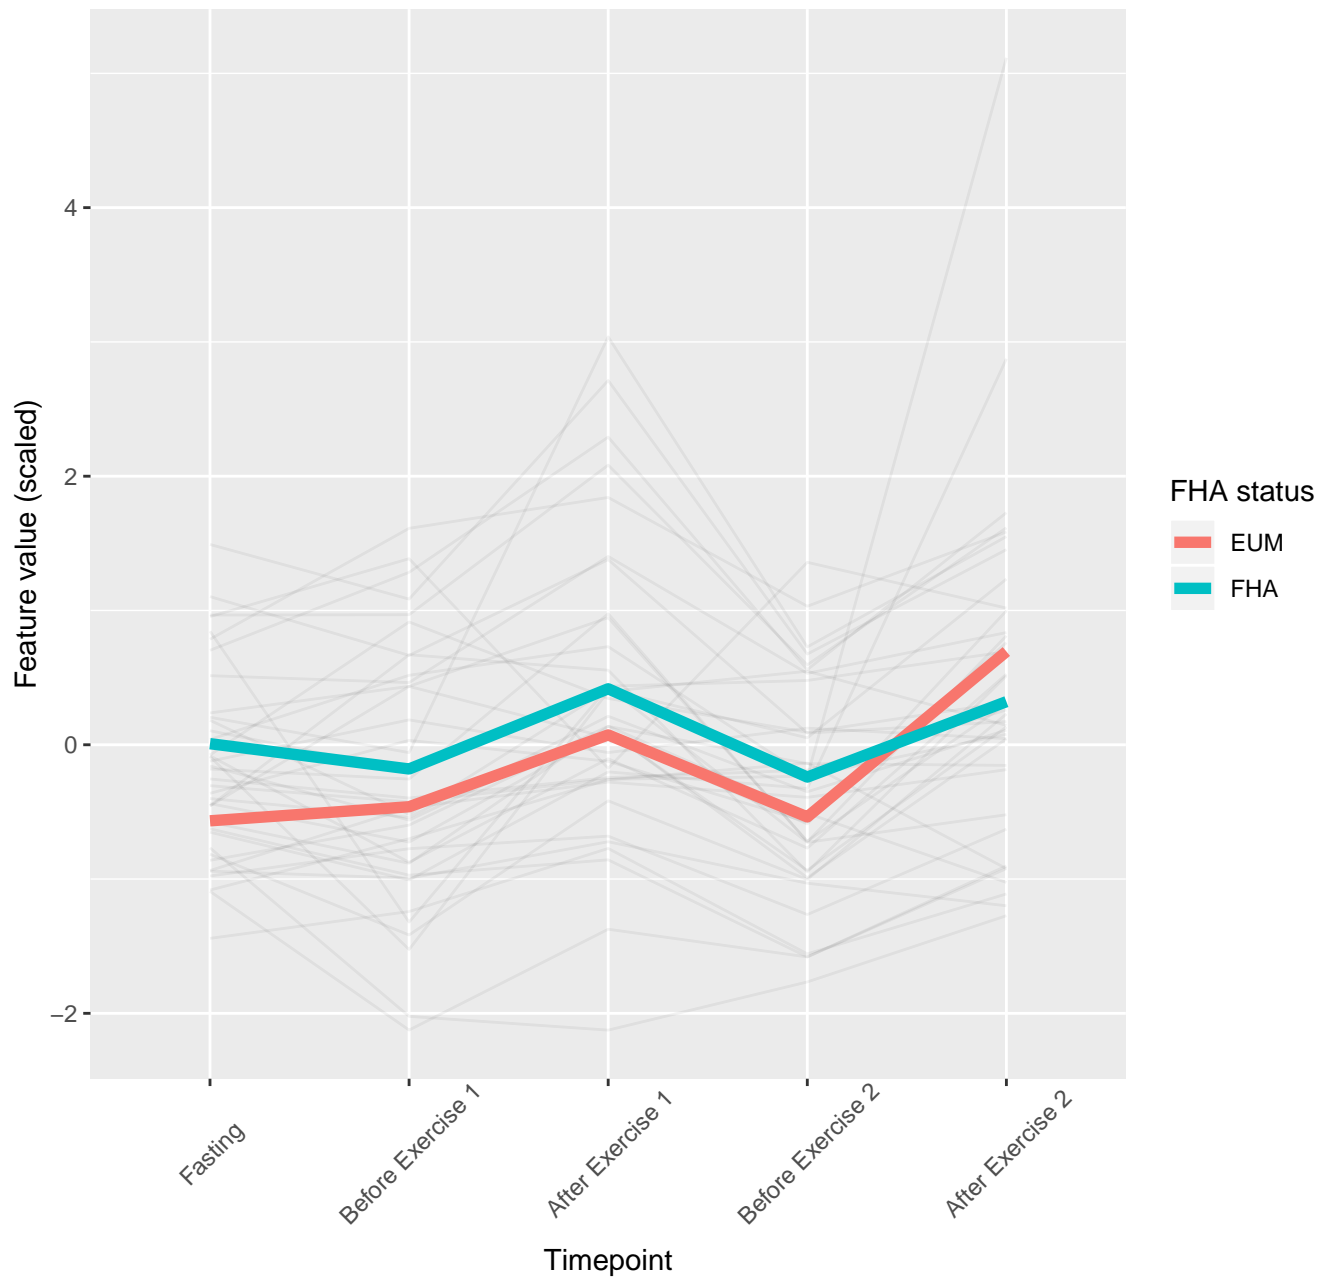

Line plot of SM(d18:2/18:1)

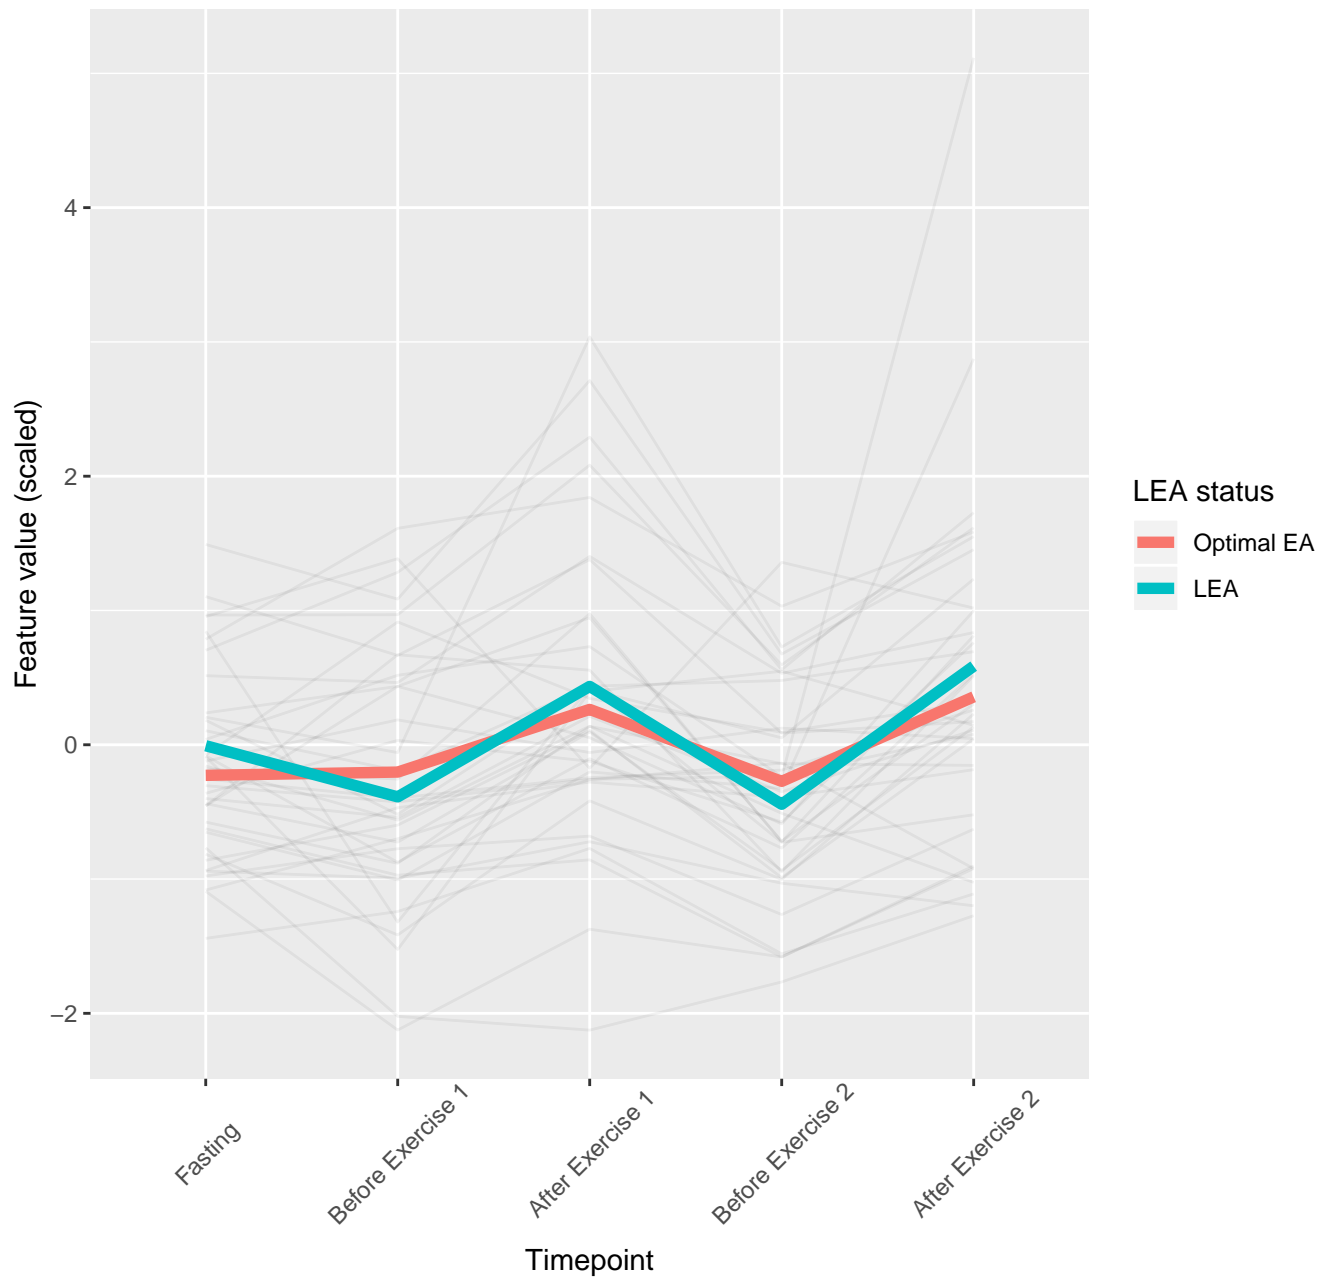

Line plot of SM(d18:2/24:1)

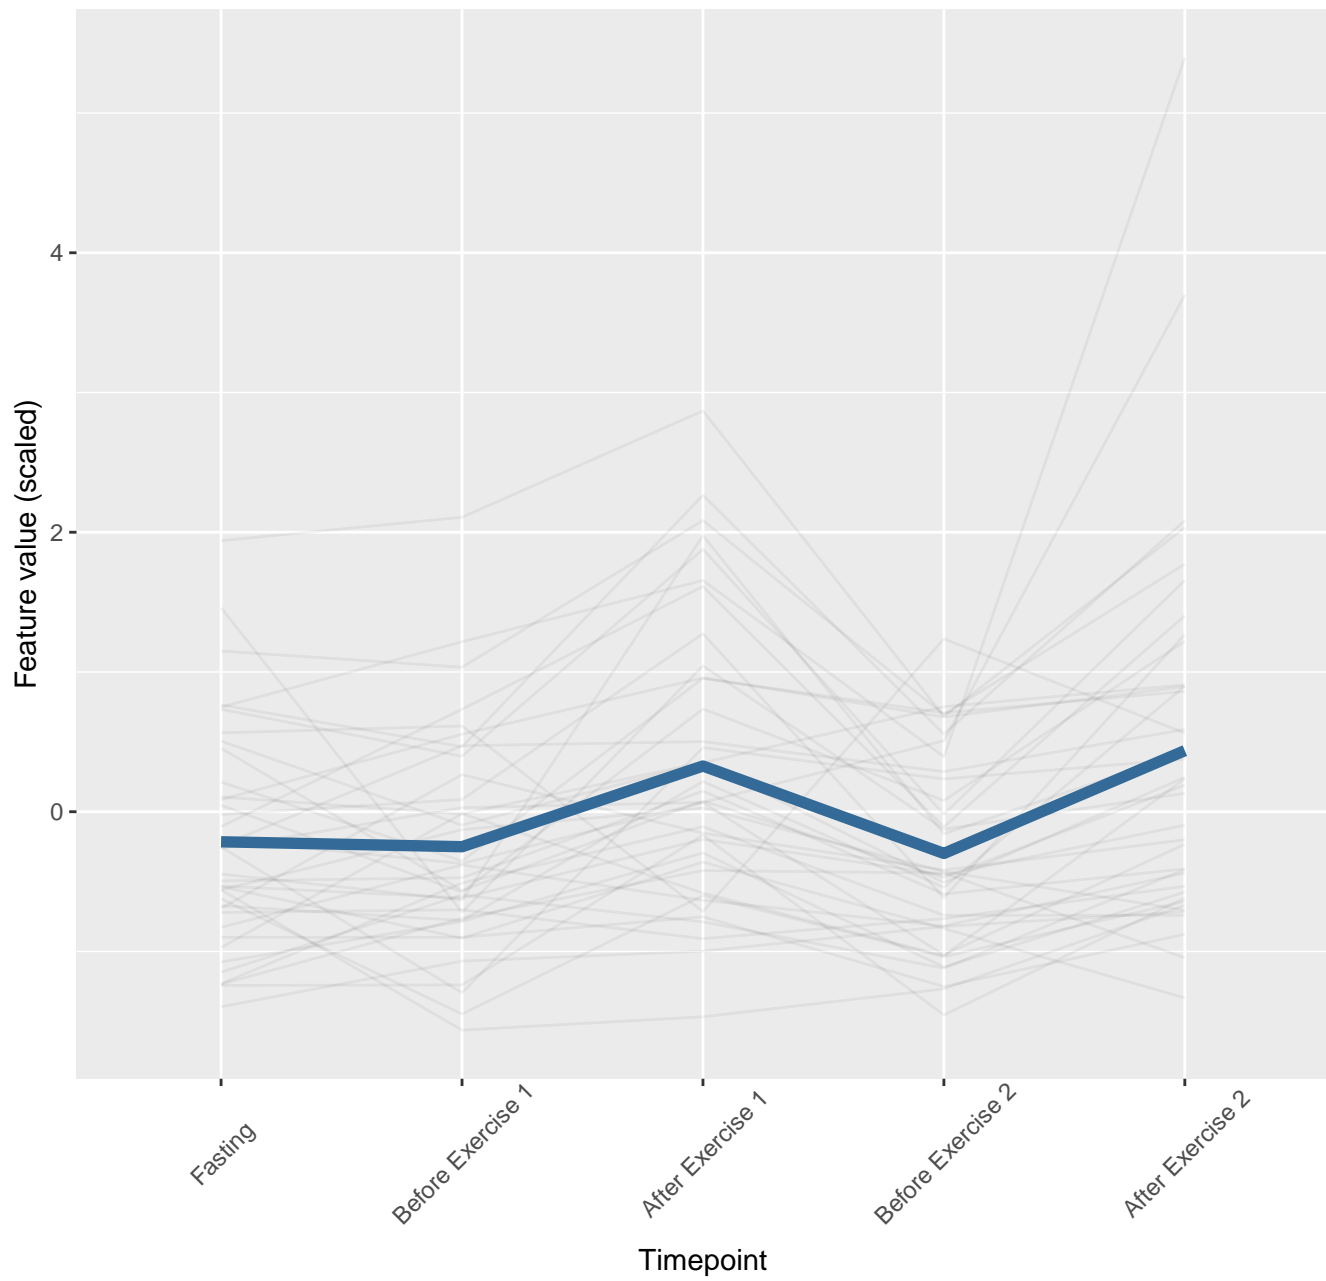

Line plot of SM(d18:2/24:1)

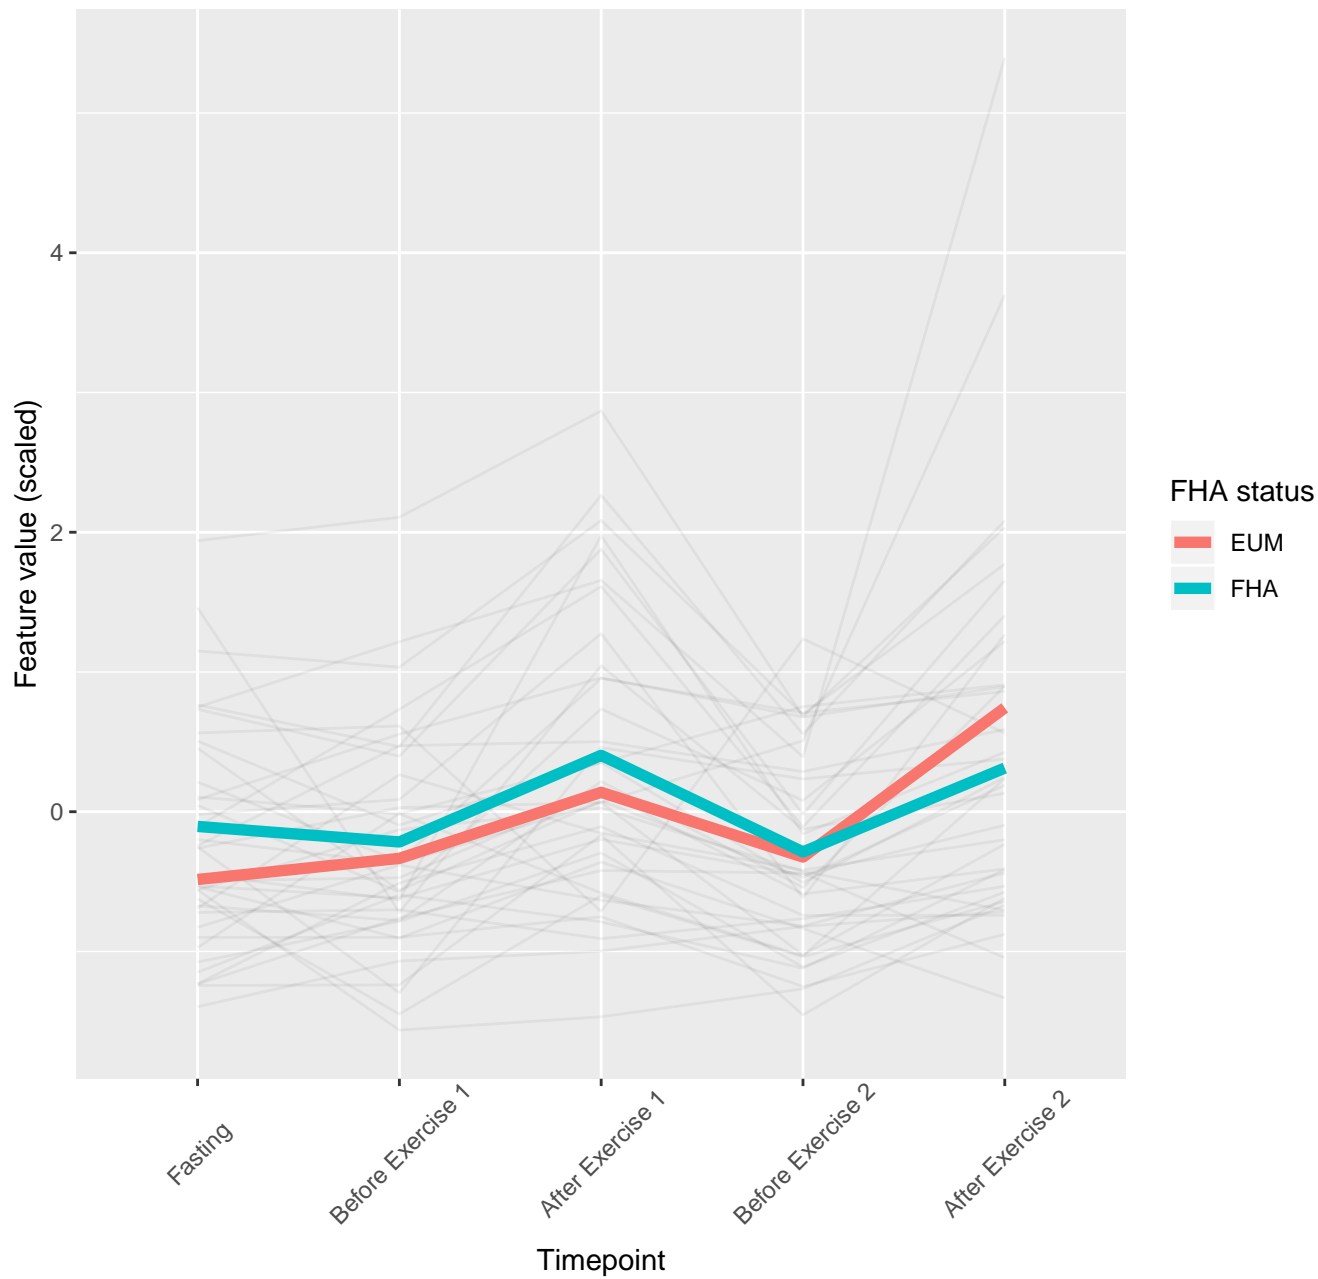



Line plot of SM(d18:2/24:1)

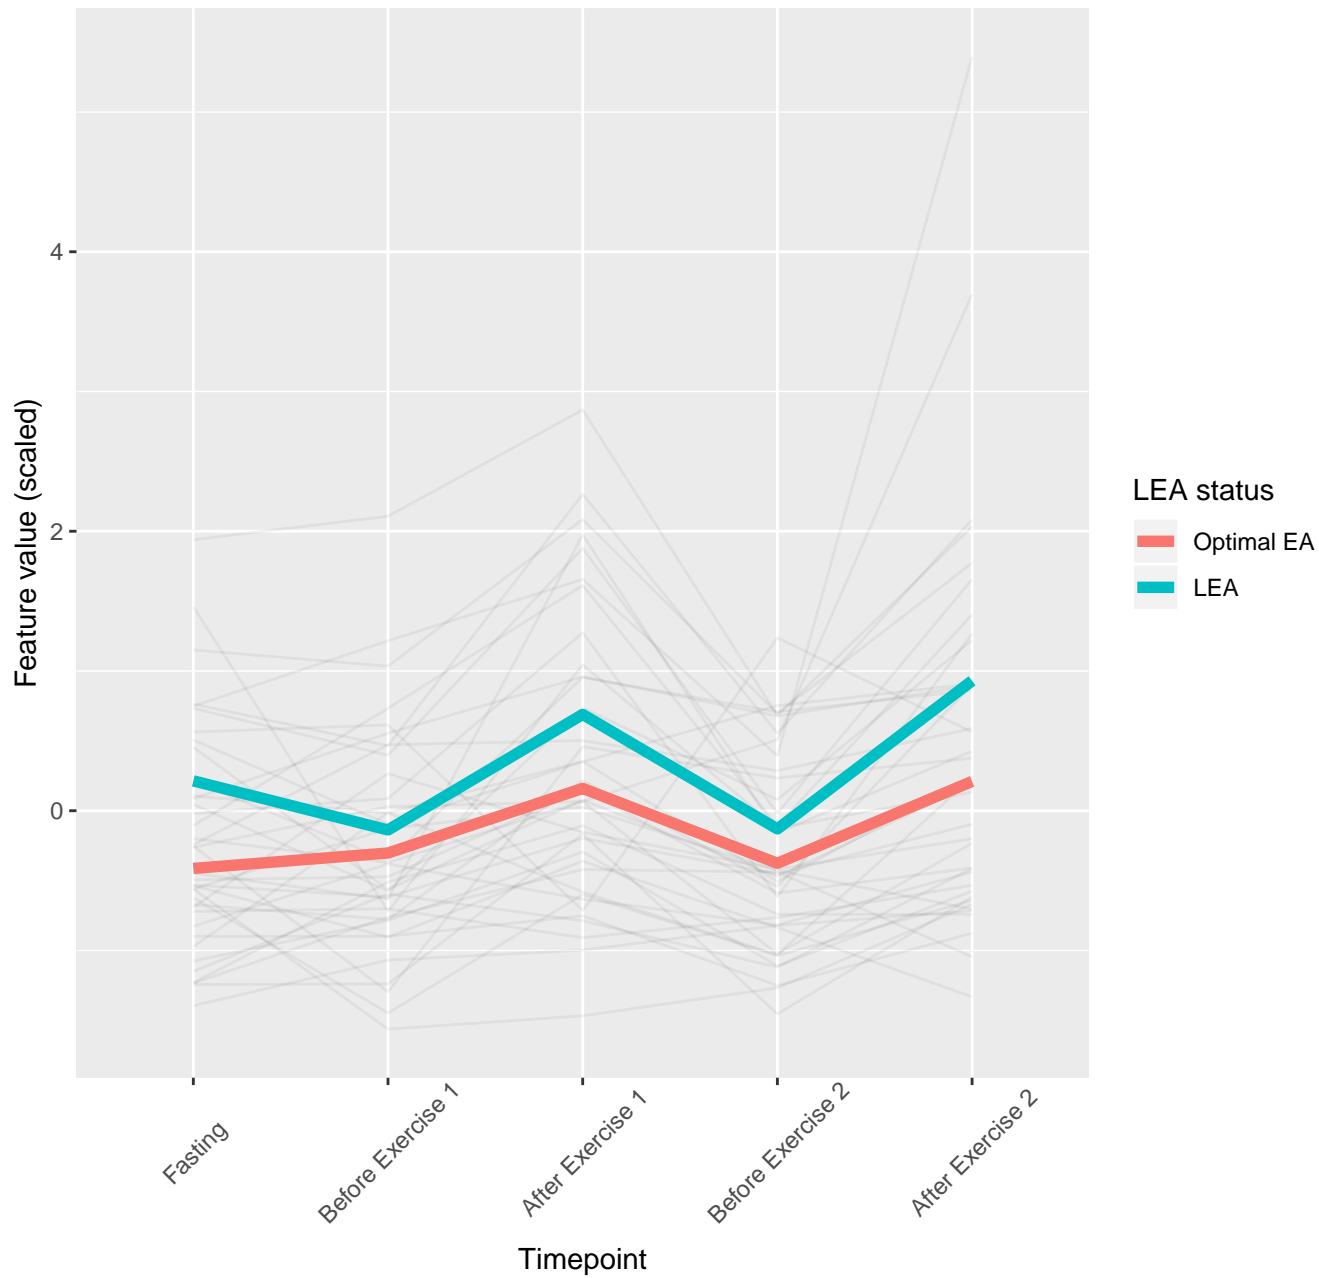

Line plot of SM(d32:1)

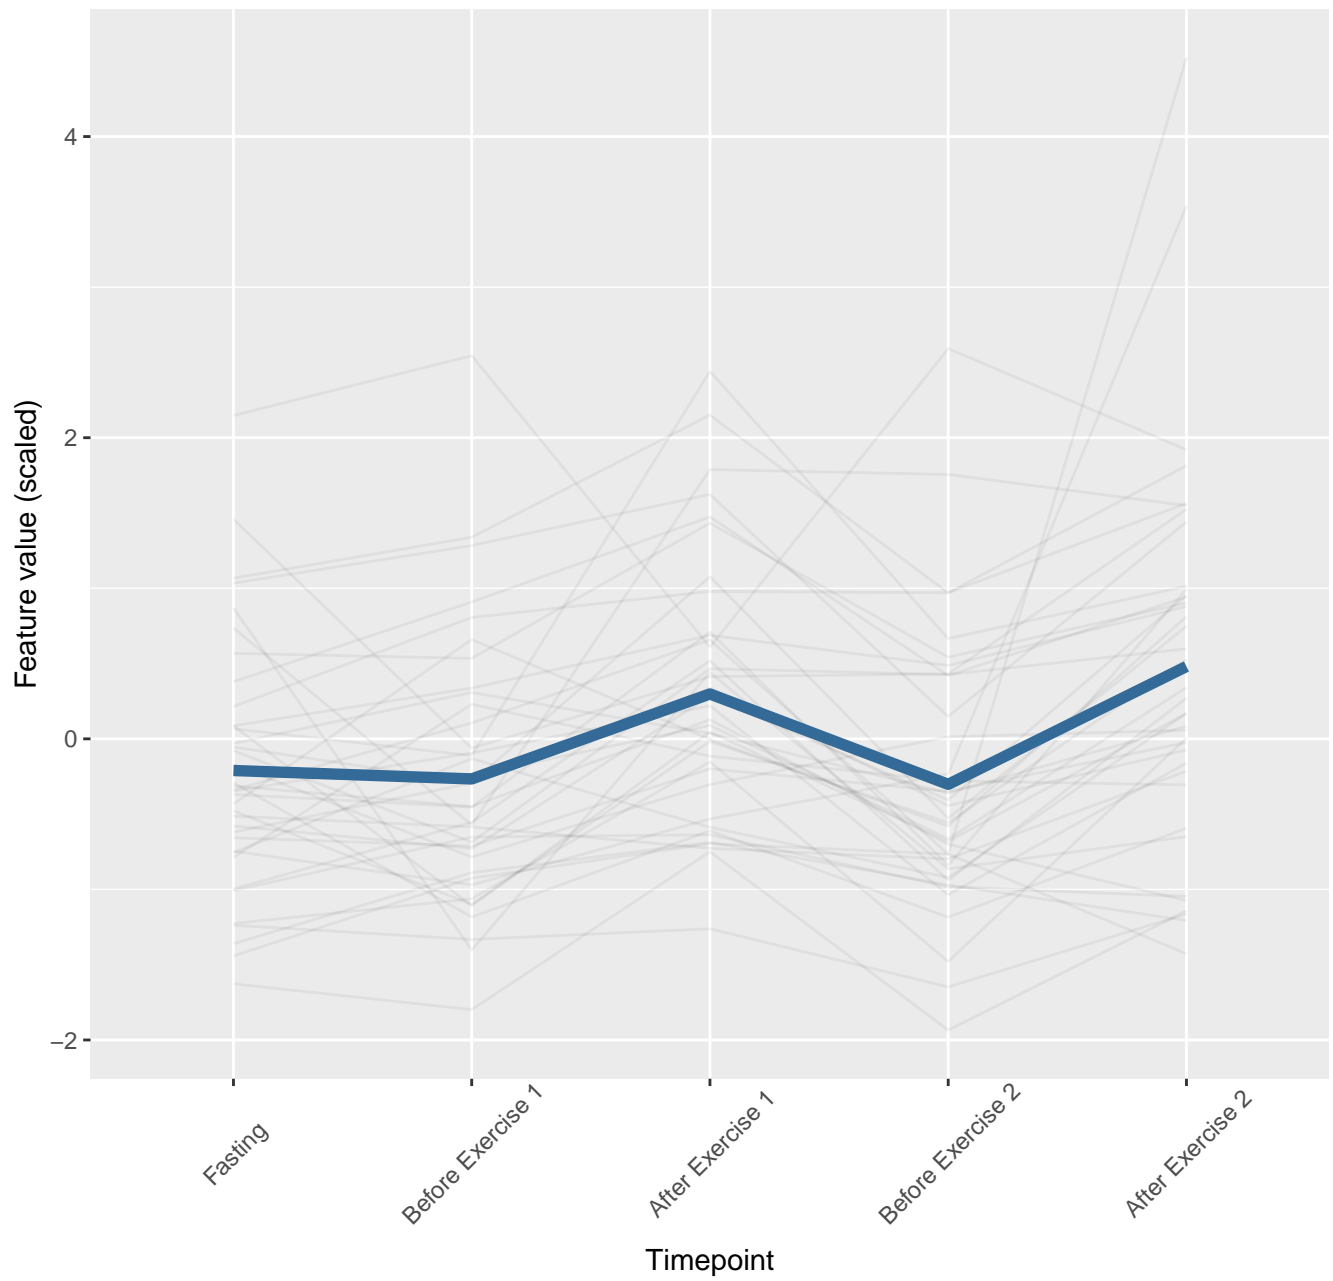

Line plot of SM(d32:1)

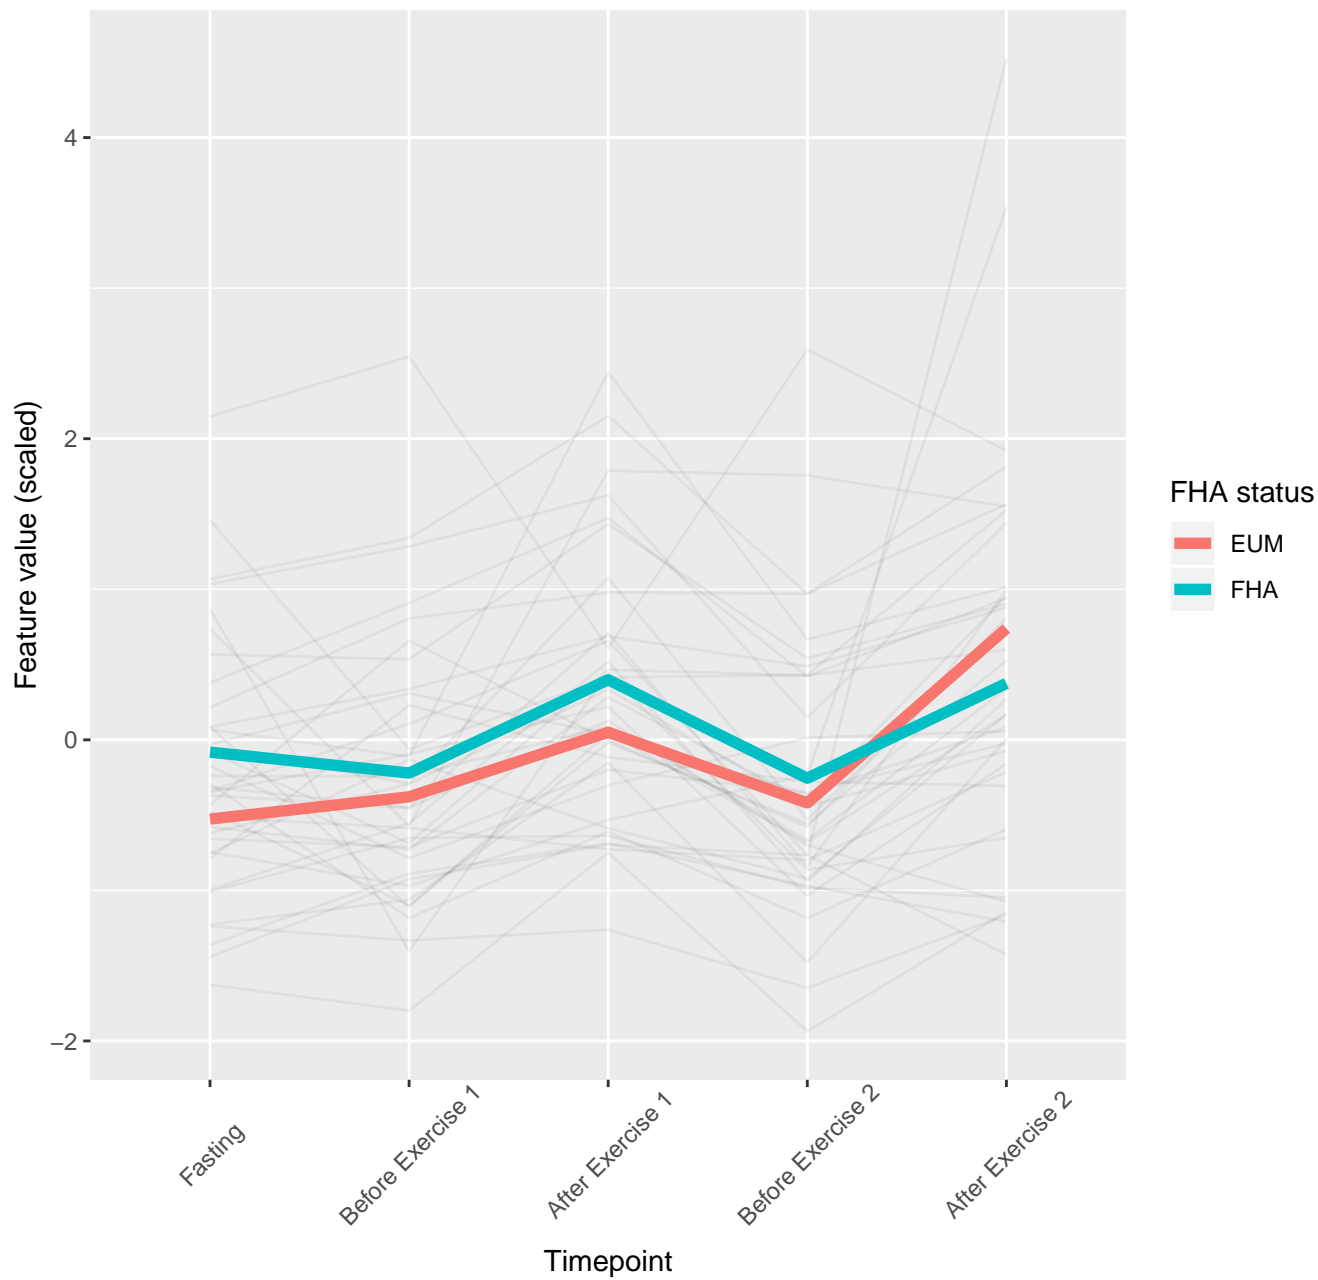

Line plot of SM(d32:1)

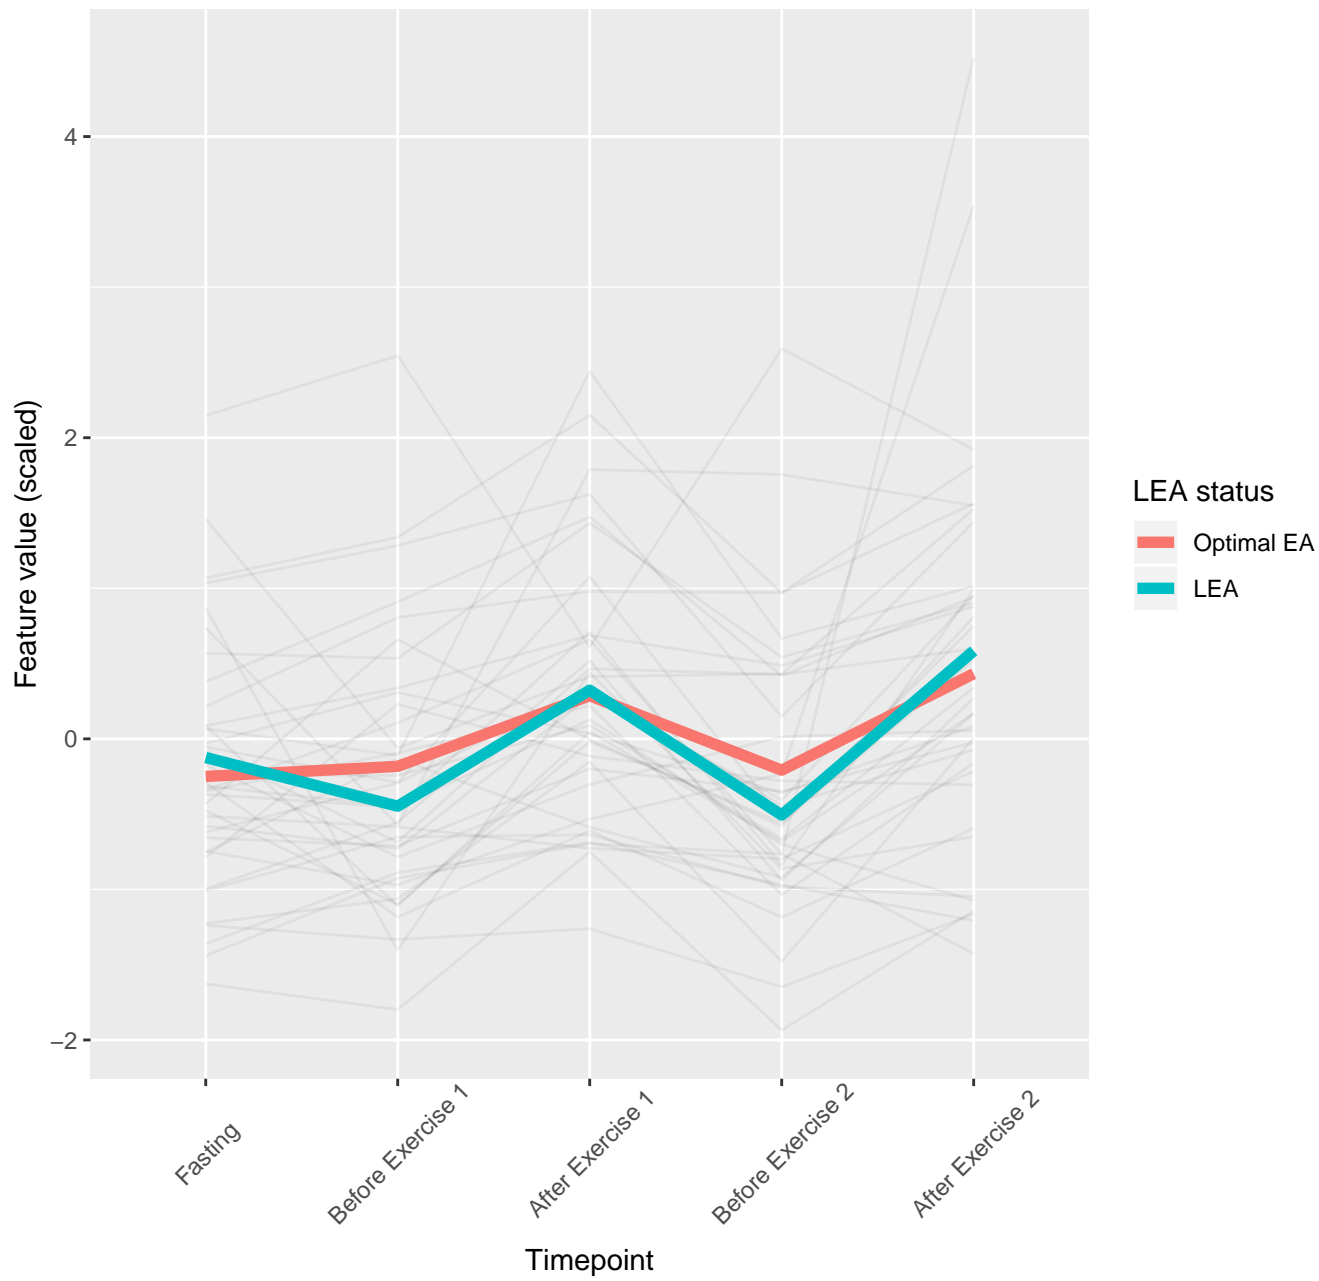

Line plot of SM(d33:1)

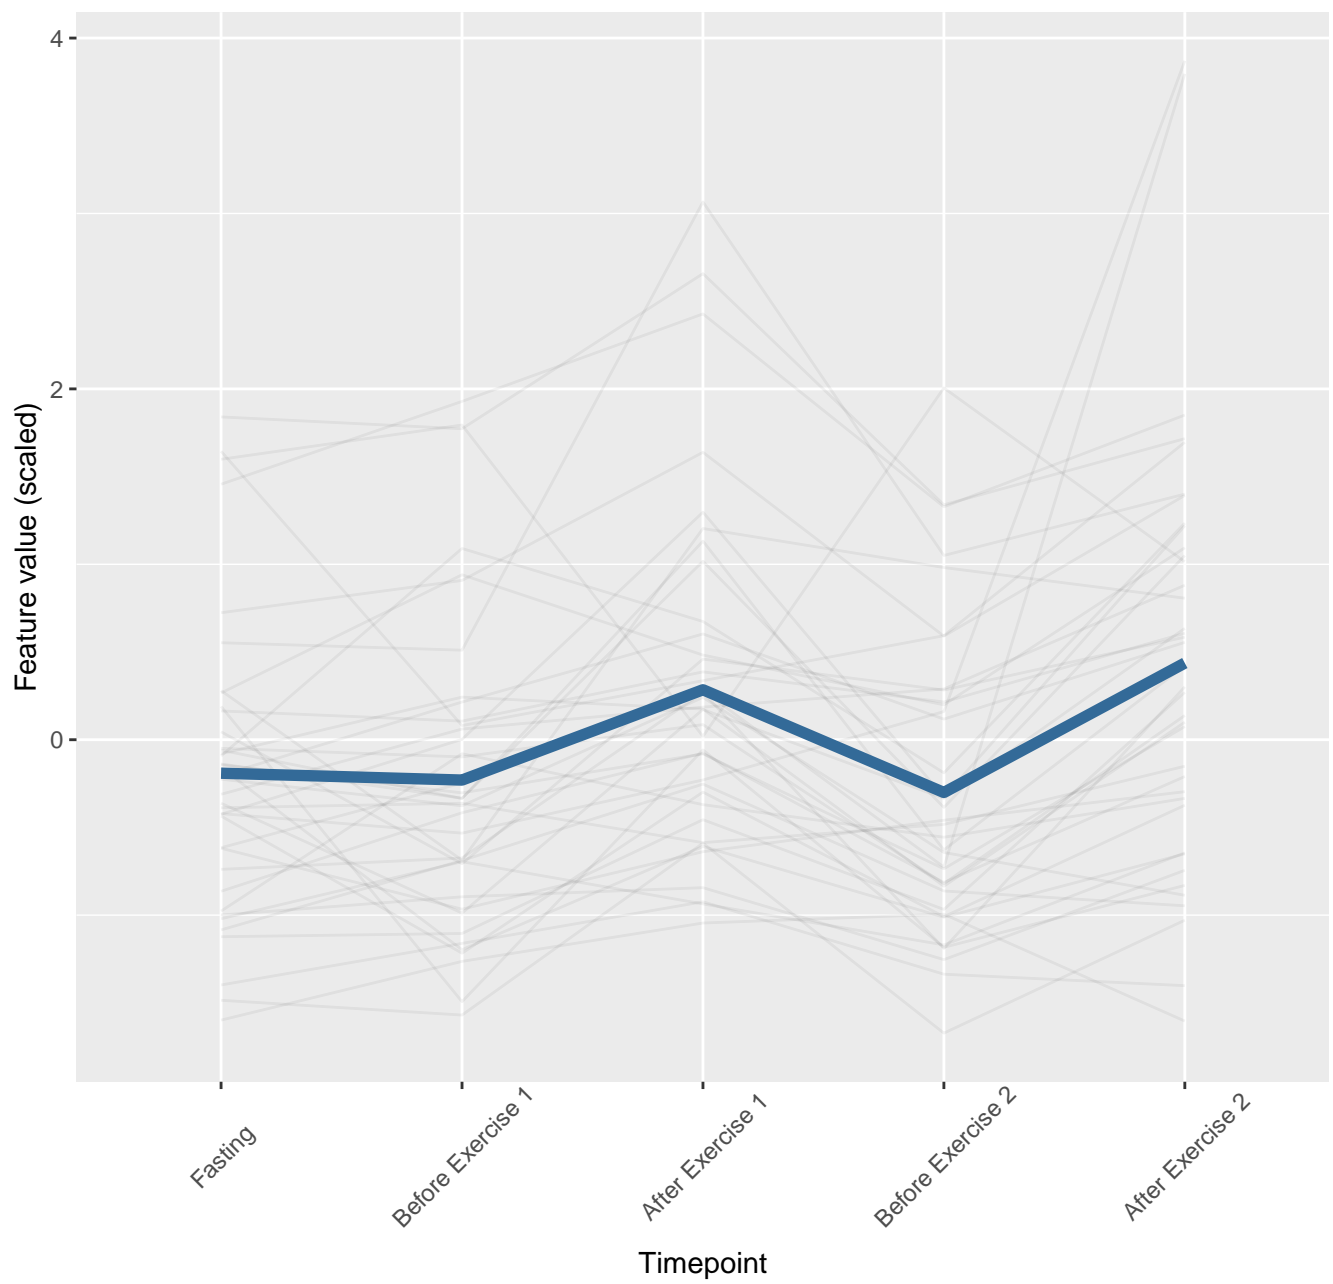

Line plot of SM(d33:1)

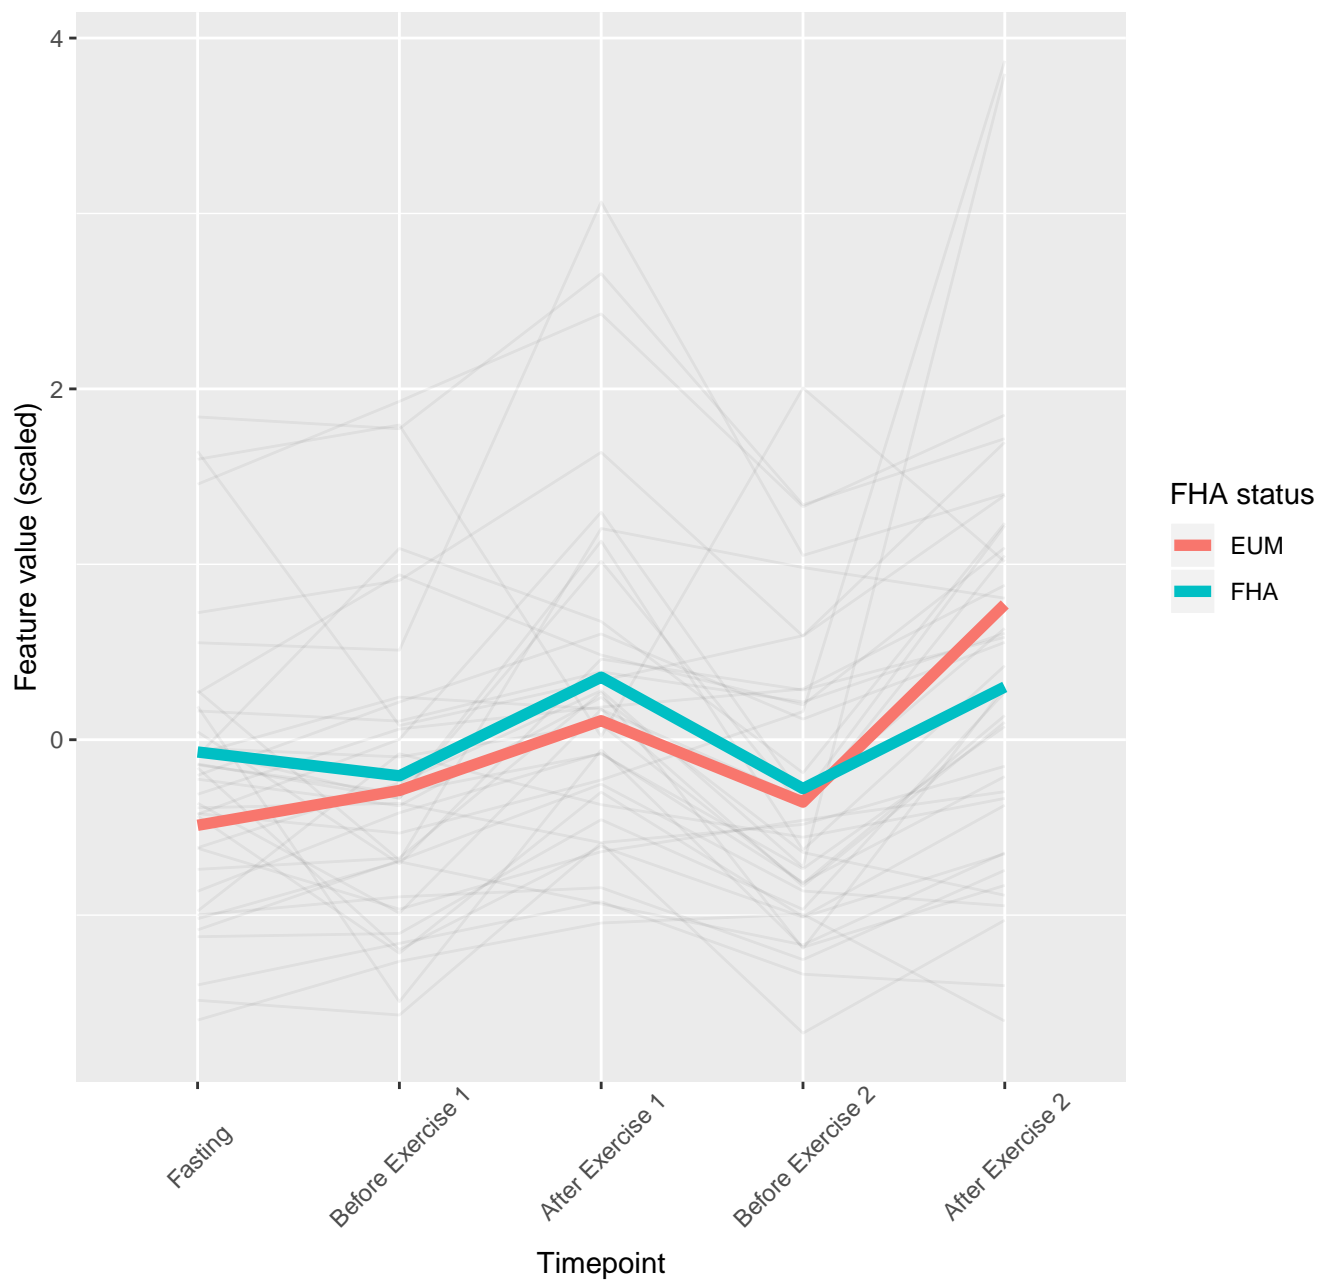

Line plot of SM(d33:1)

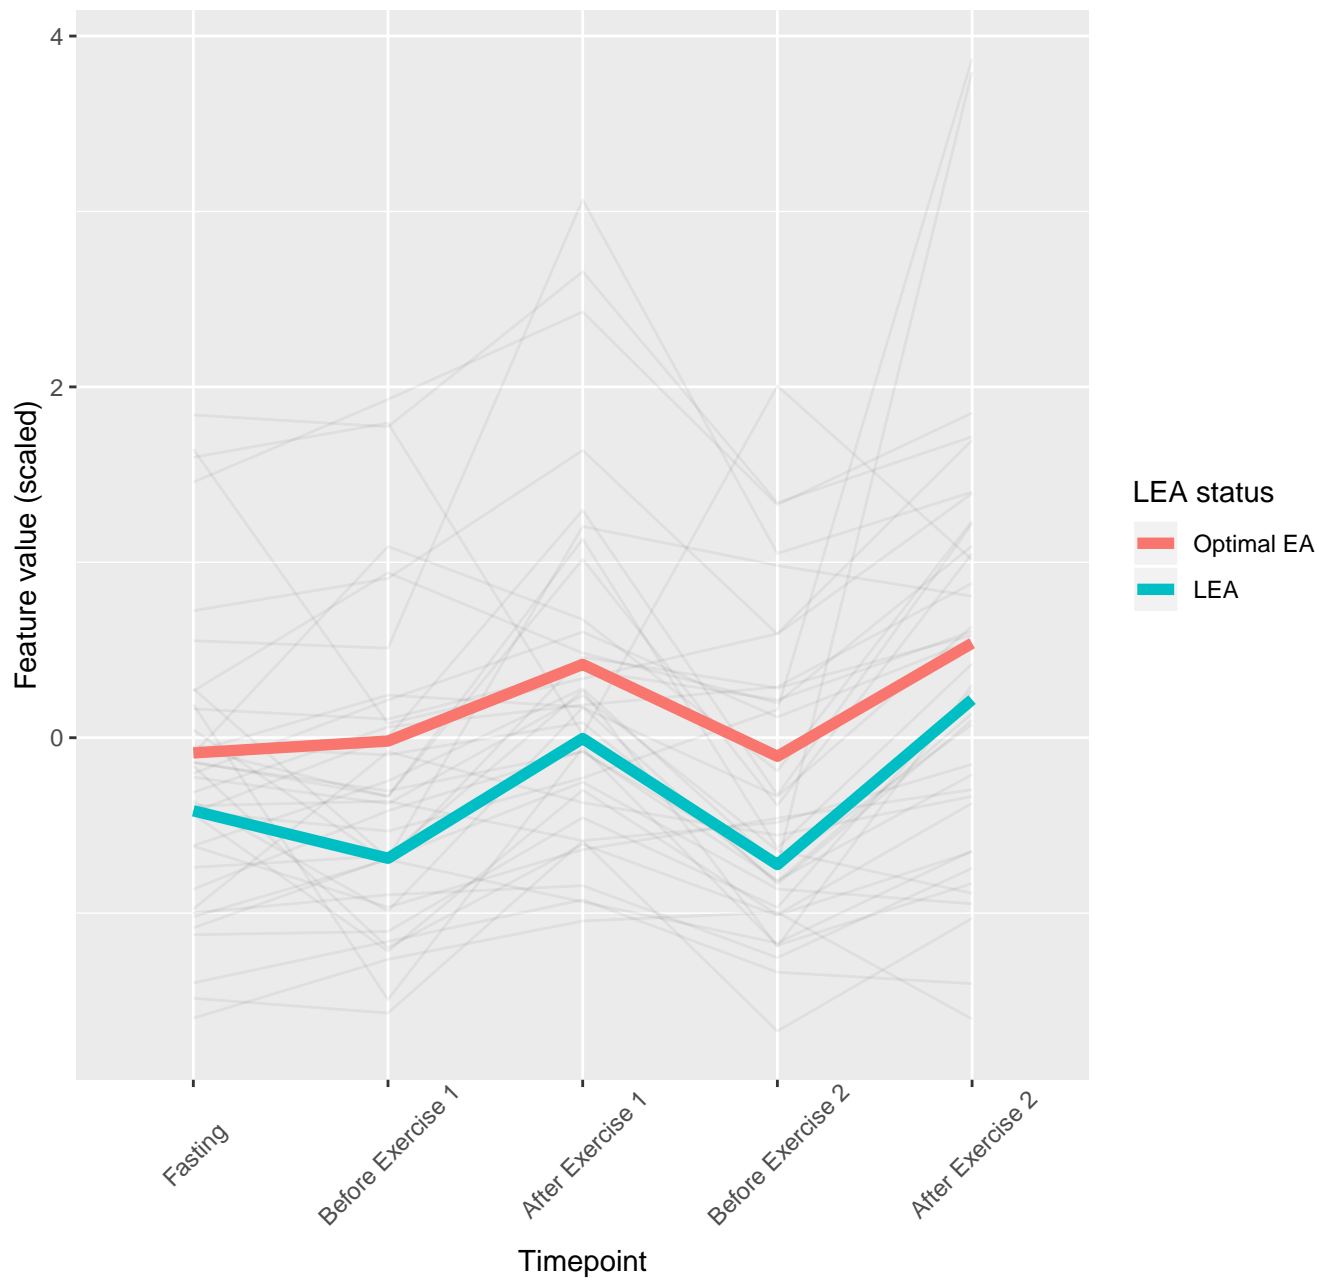

Line plot of SM(d34:1)

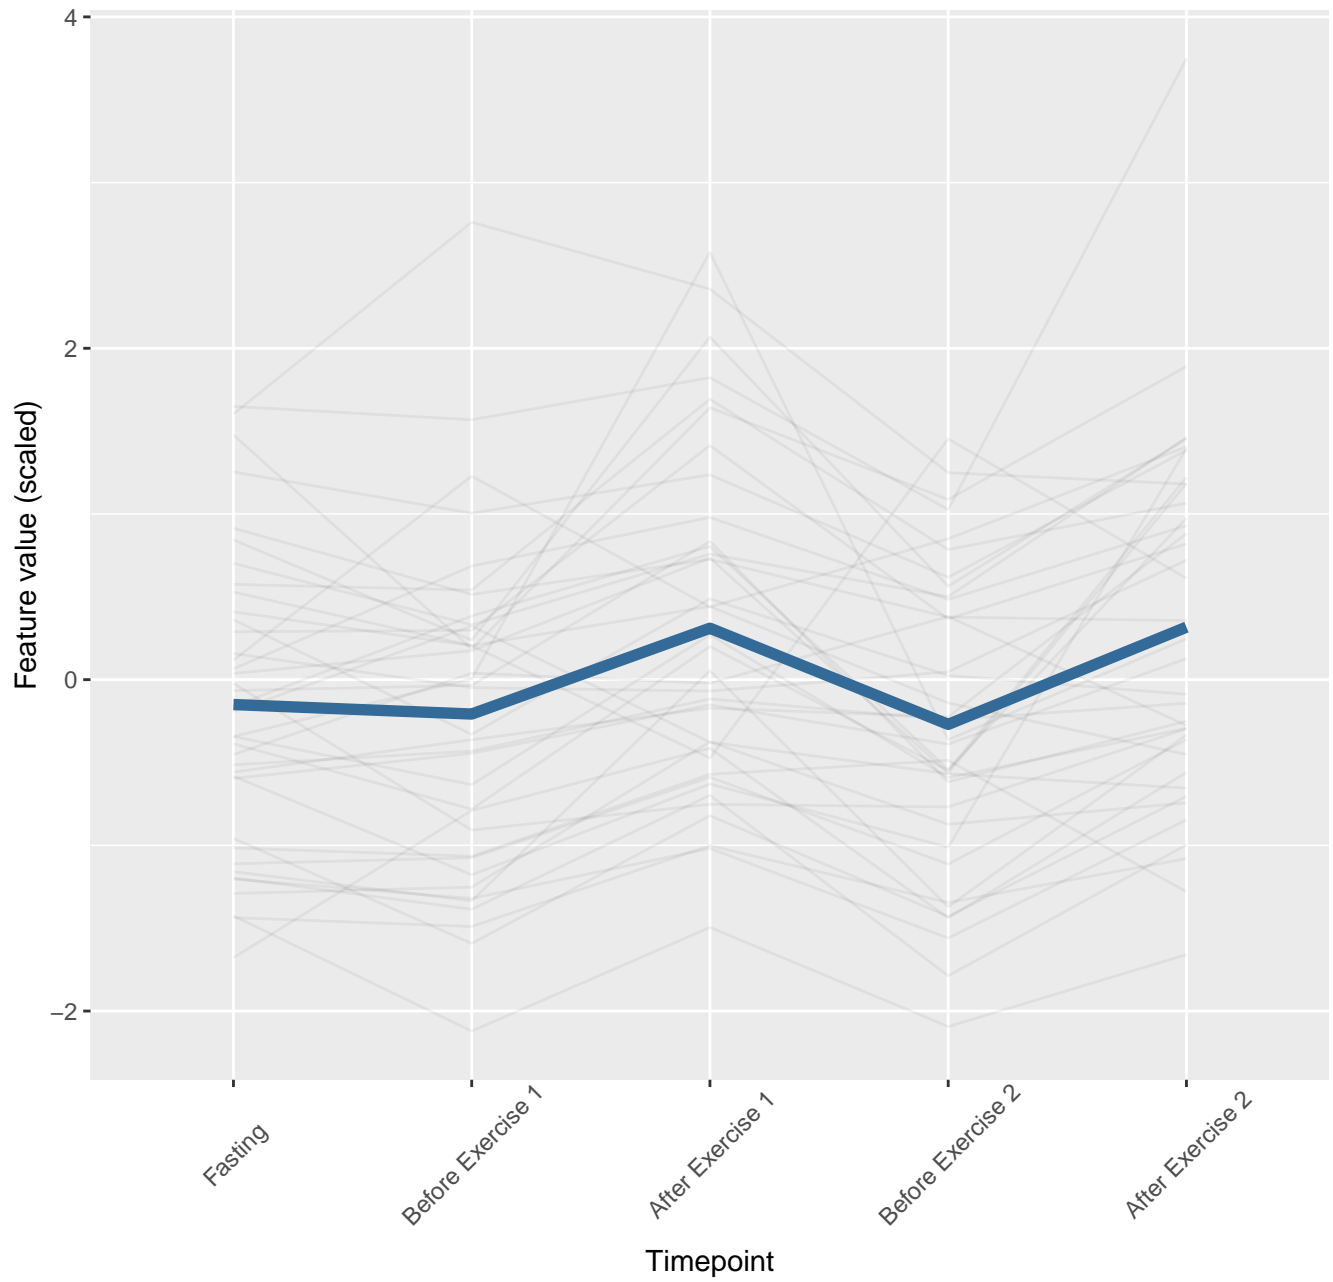



Line plot of SM(d34:1)

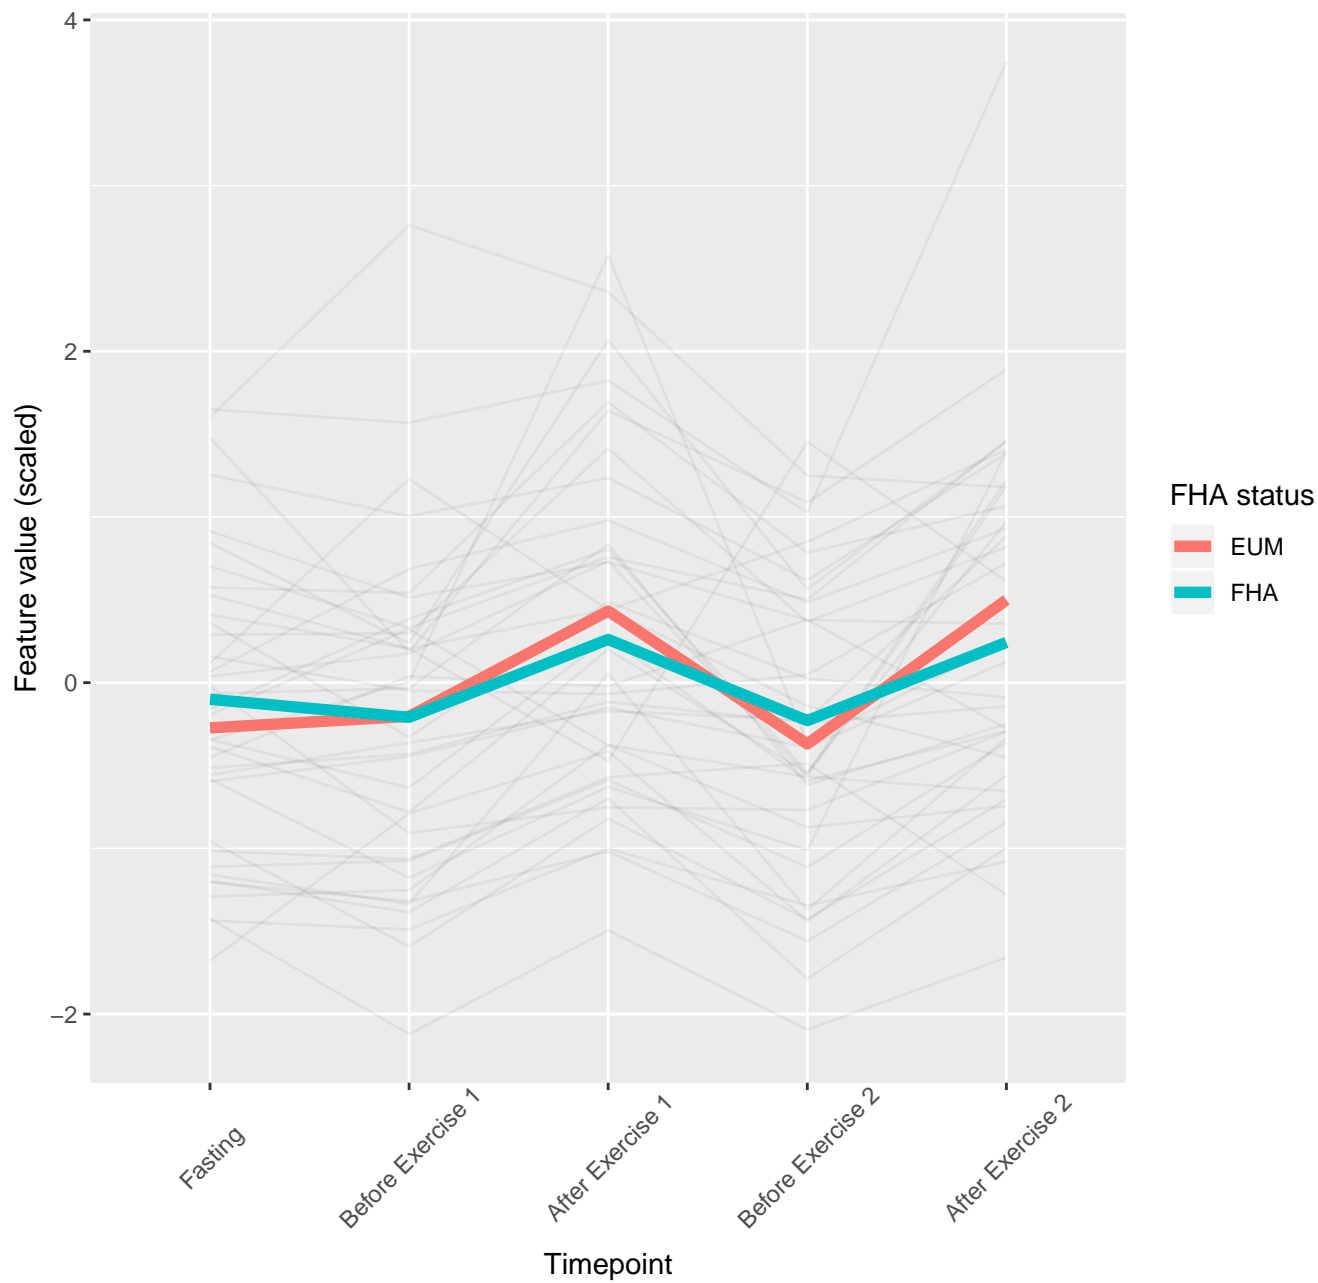

Line plot of SM(d34:1)

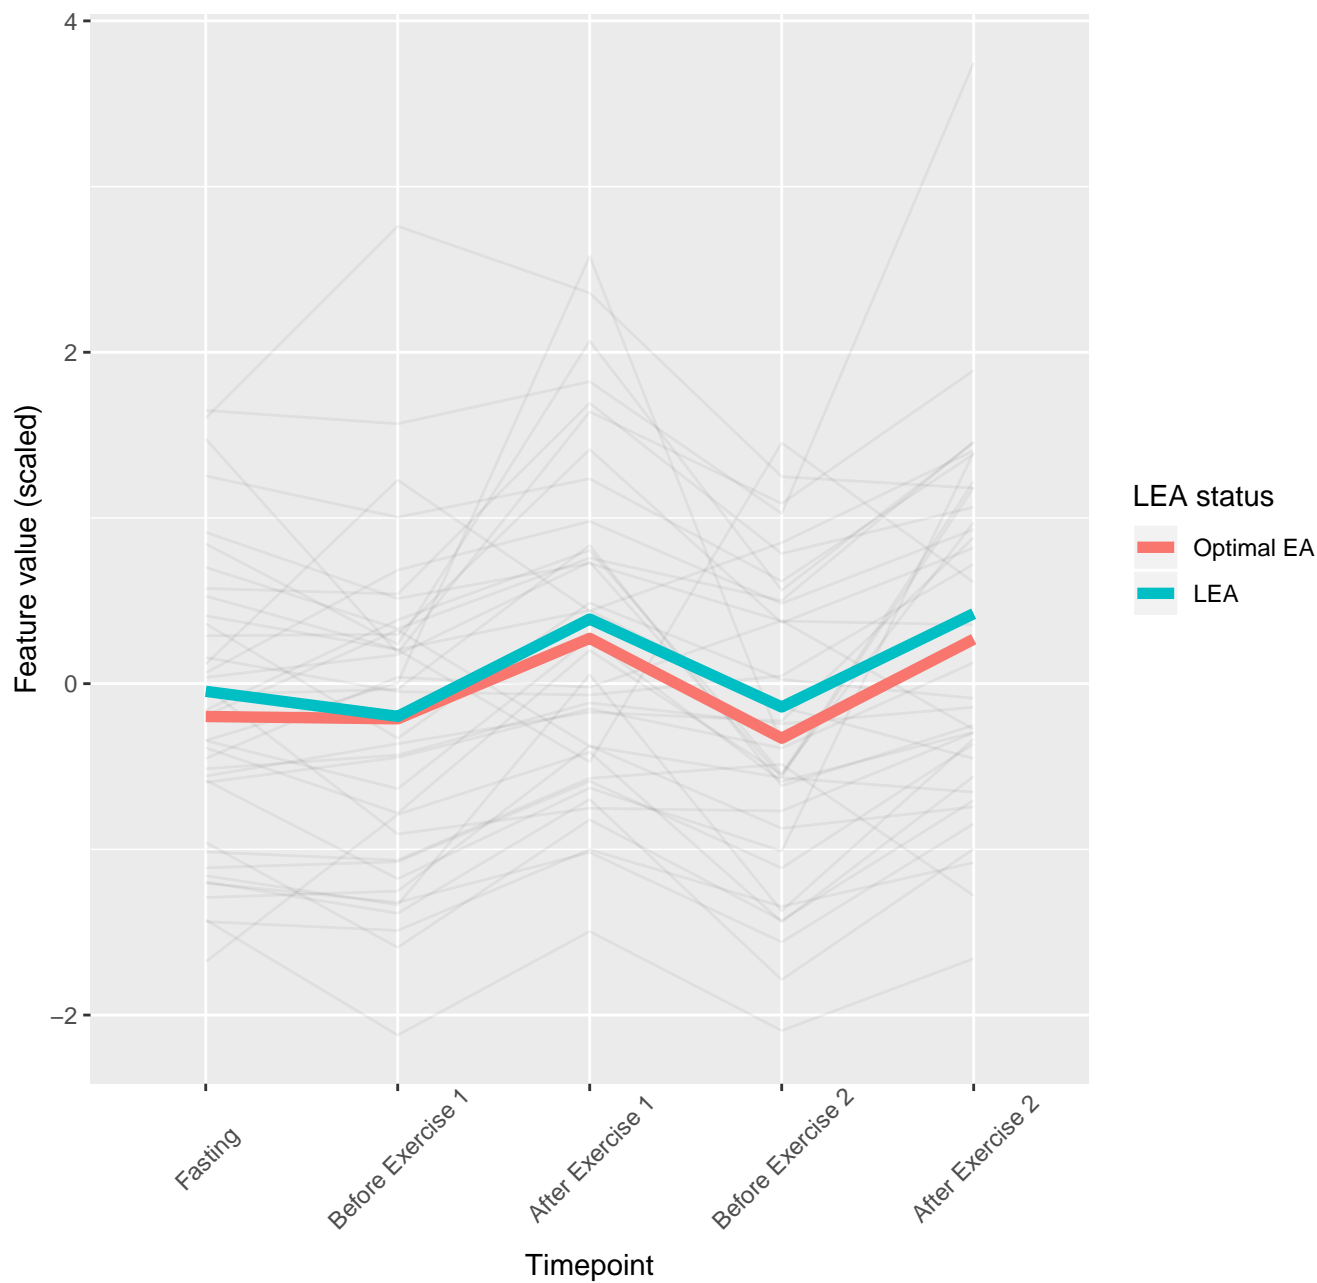

Line plot of SM(d36:1)

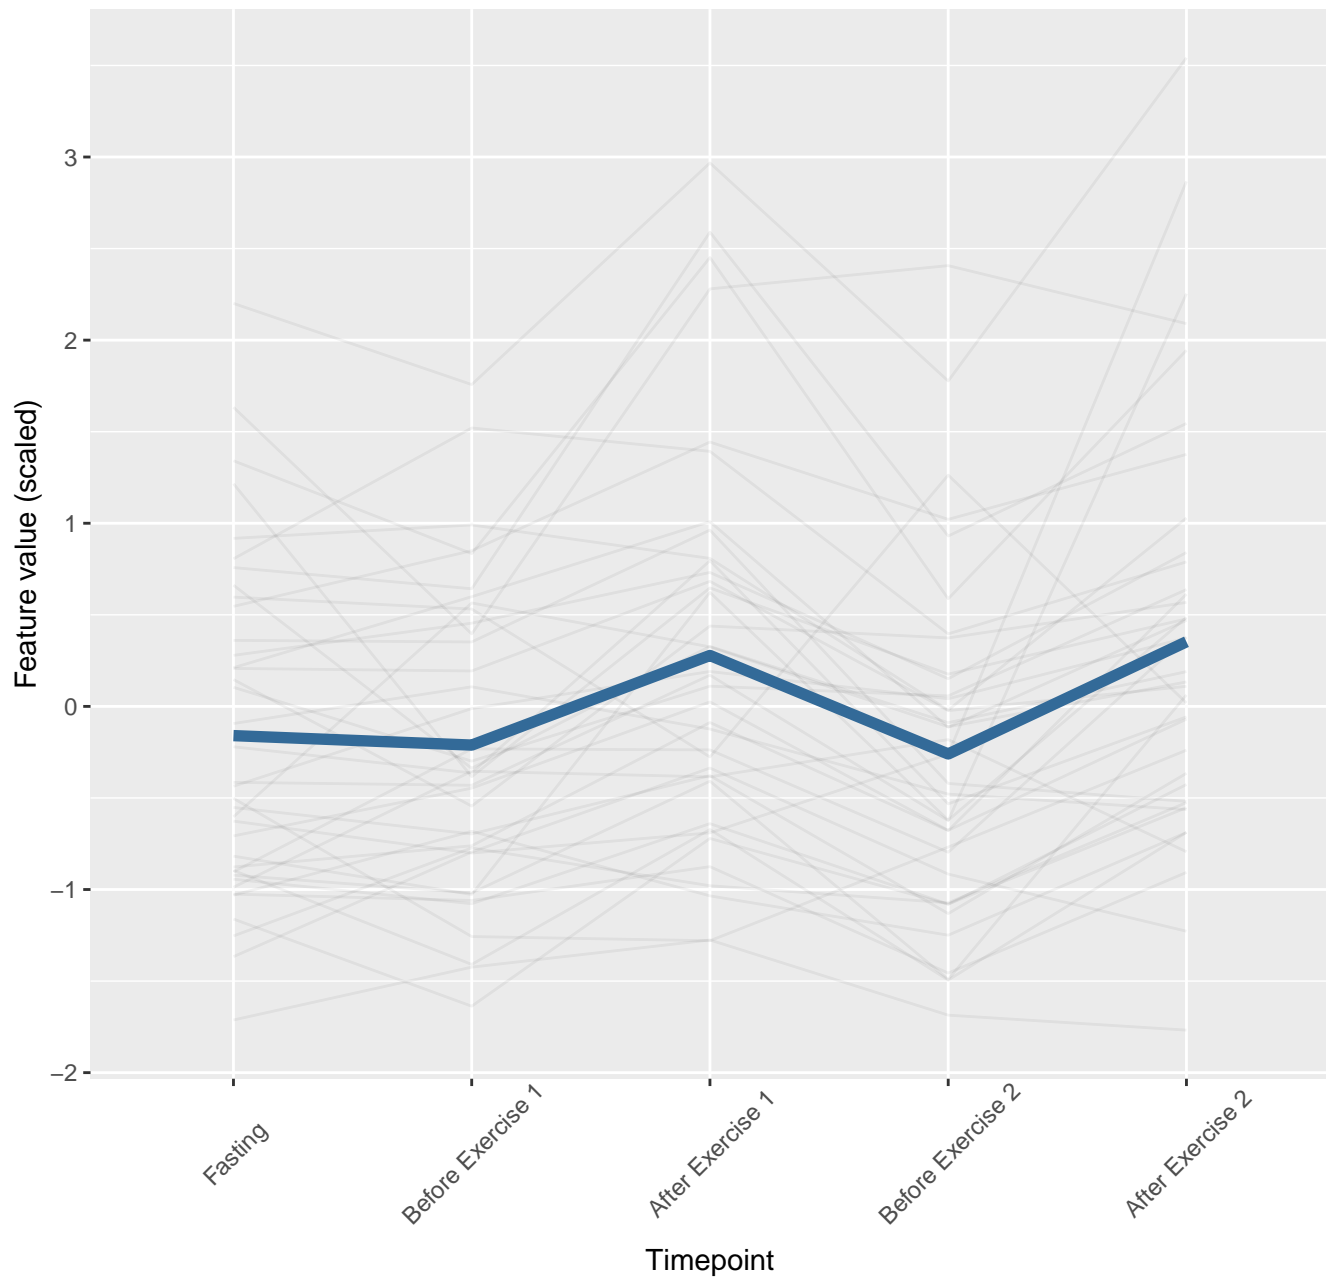

Line plot of SM(d36:1)

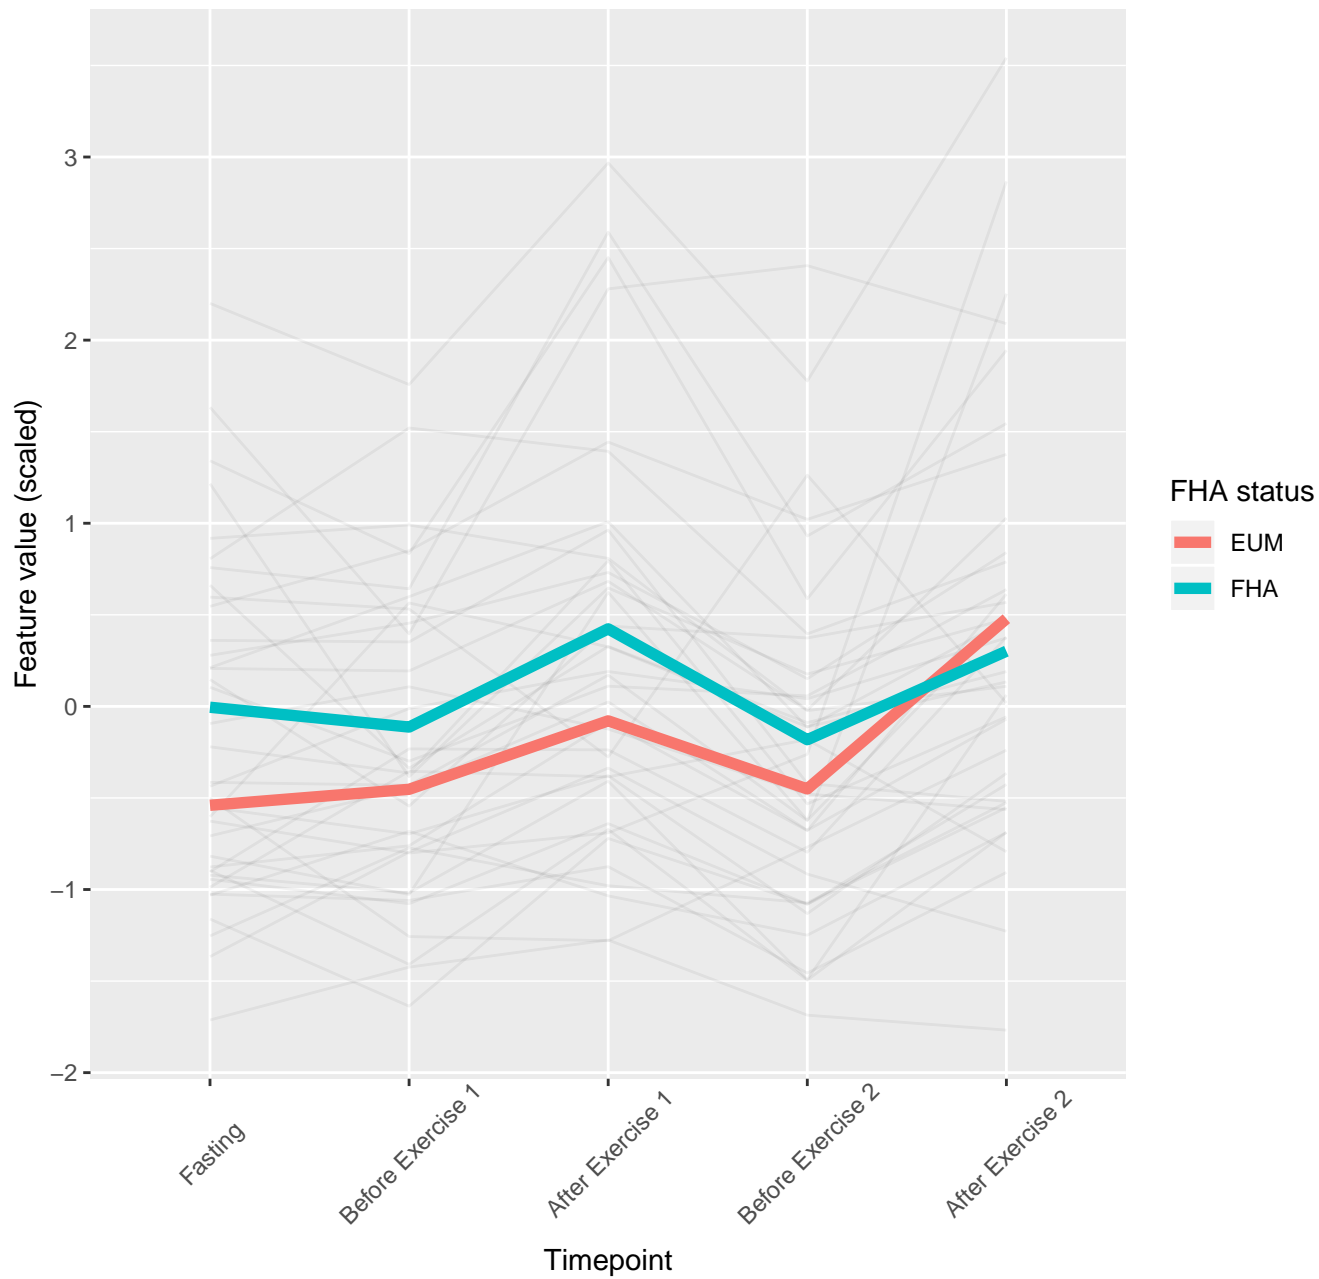

Line plot of SM(d36:1)

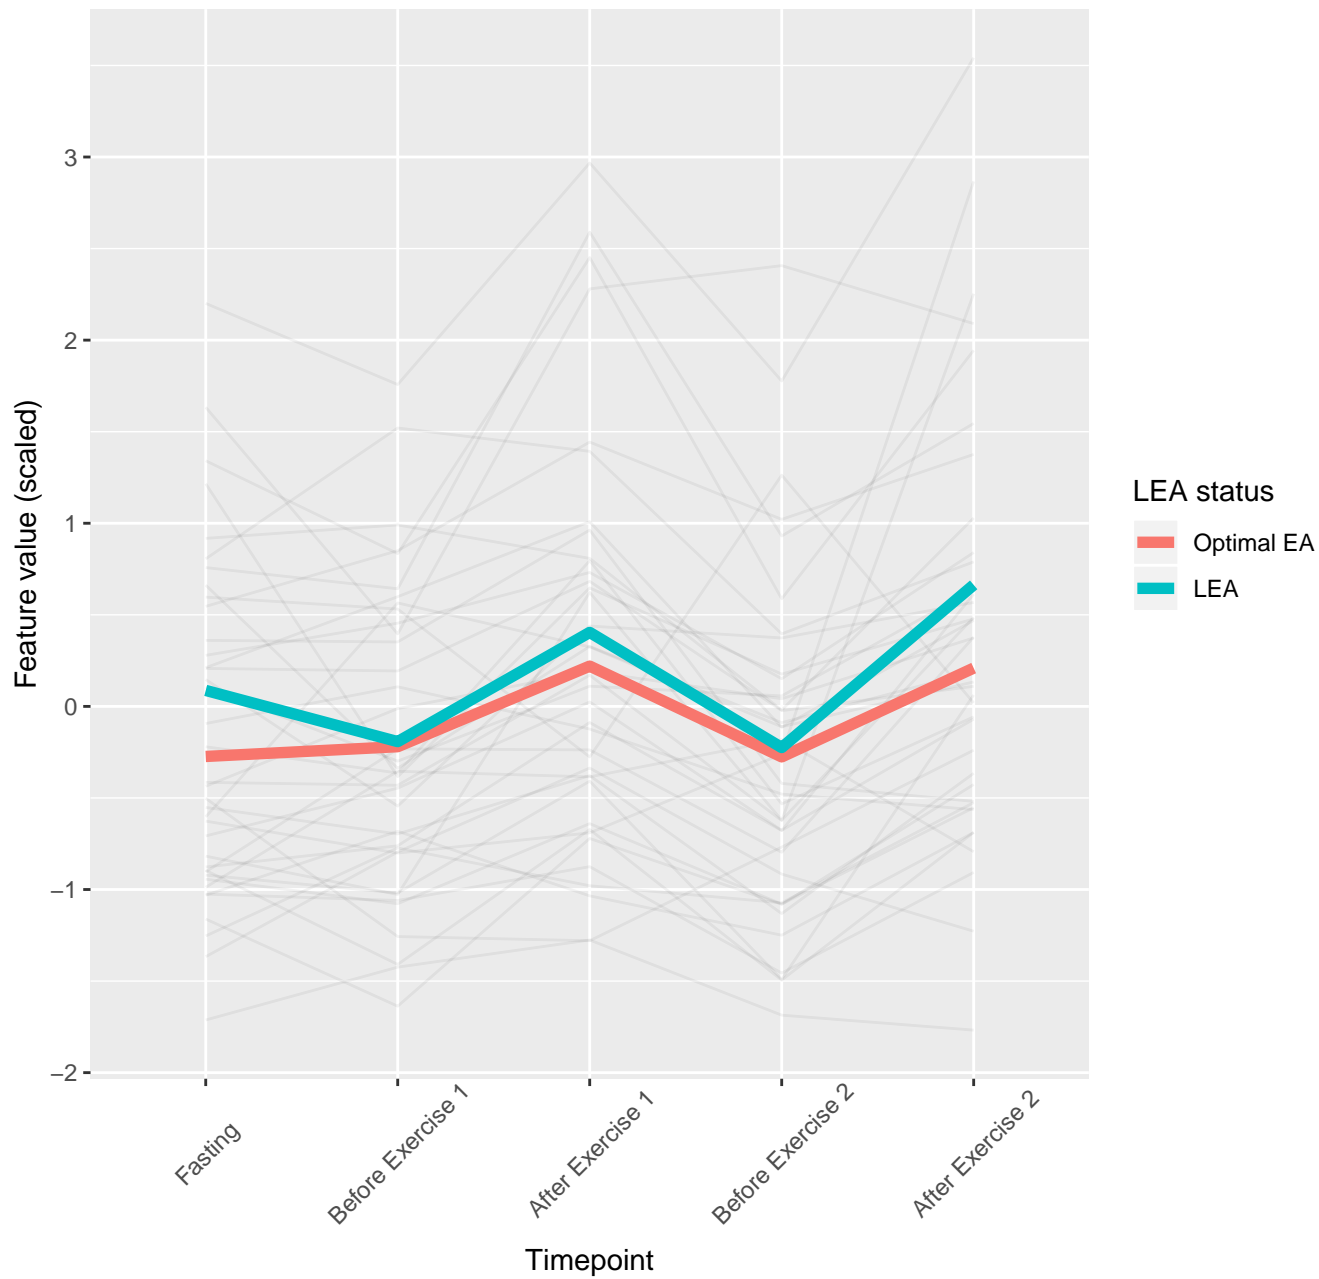

Line plot of SM(d36:2)

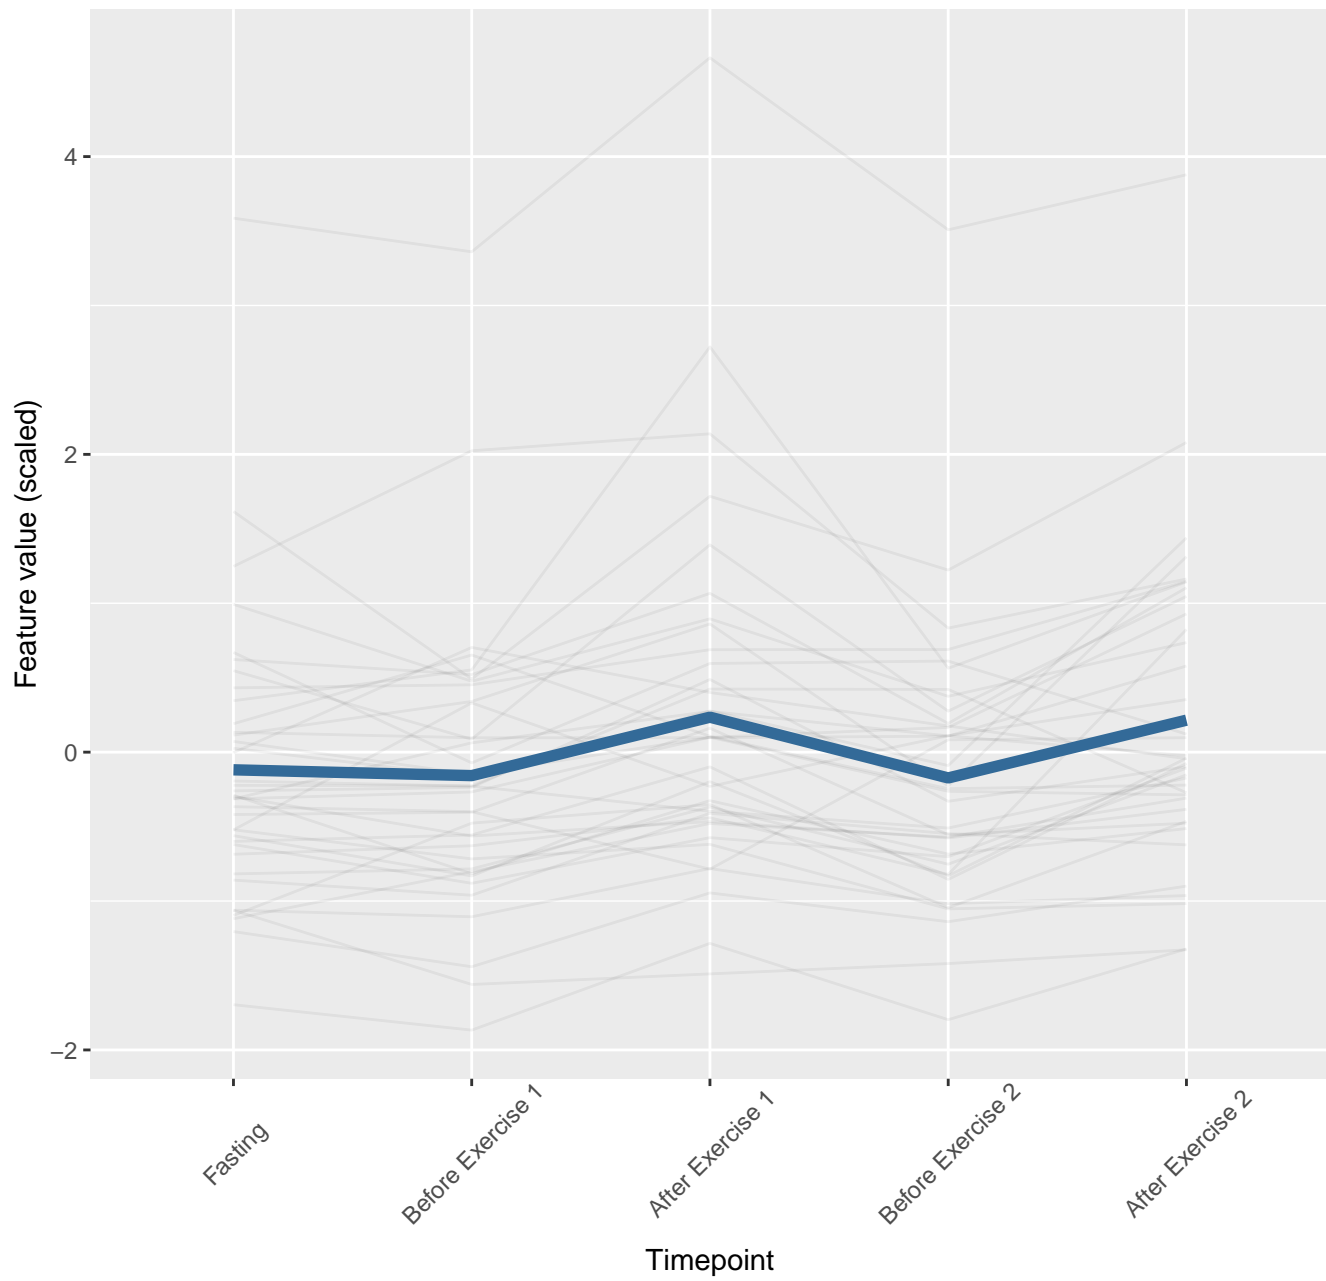

Line plot of SM(d36:2)

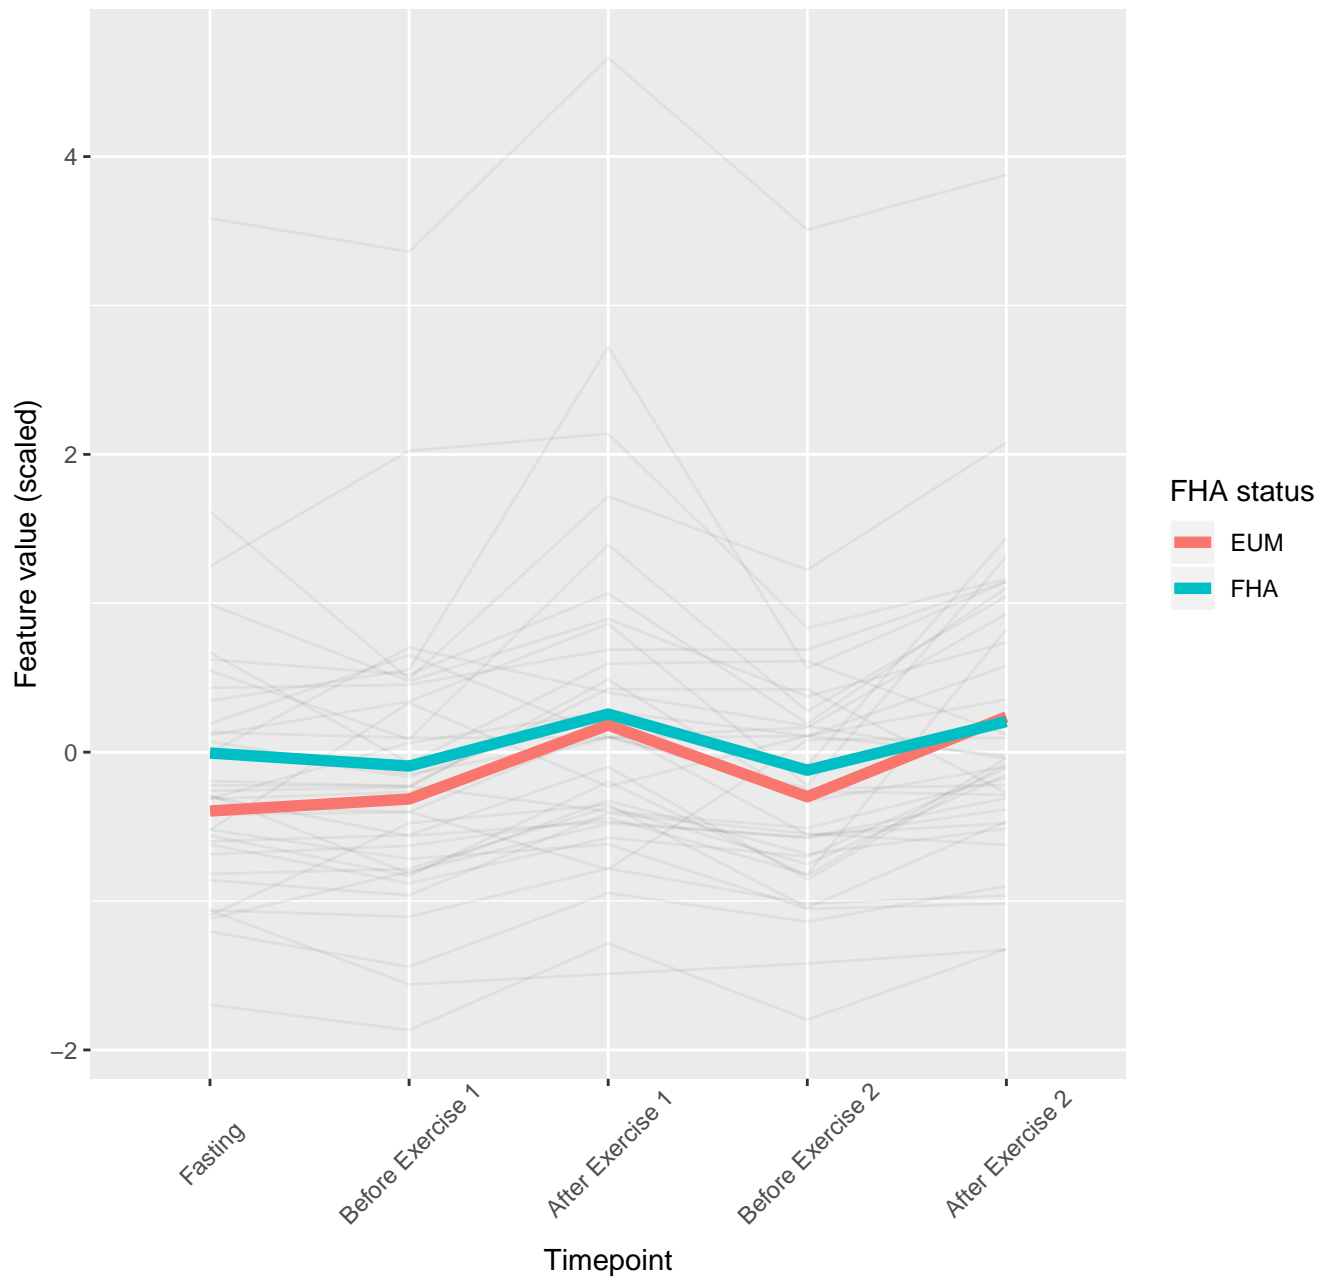

Line plot of SM(d36:2)

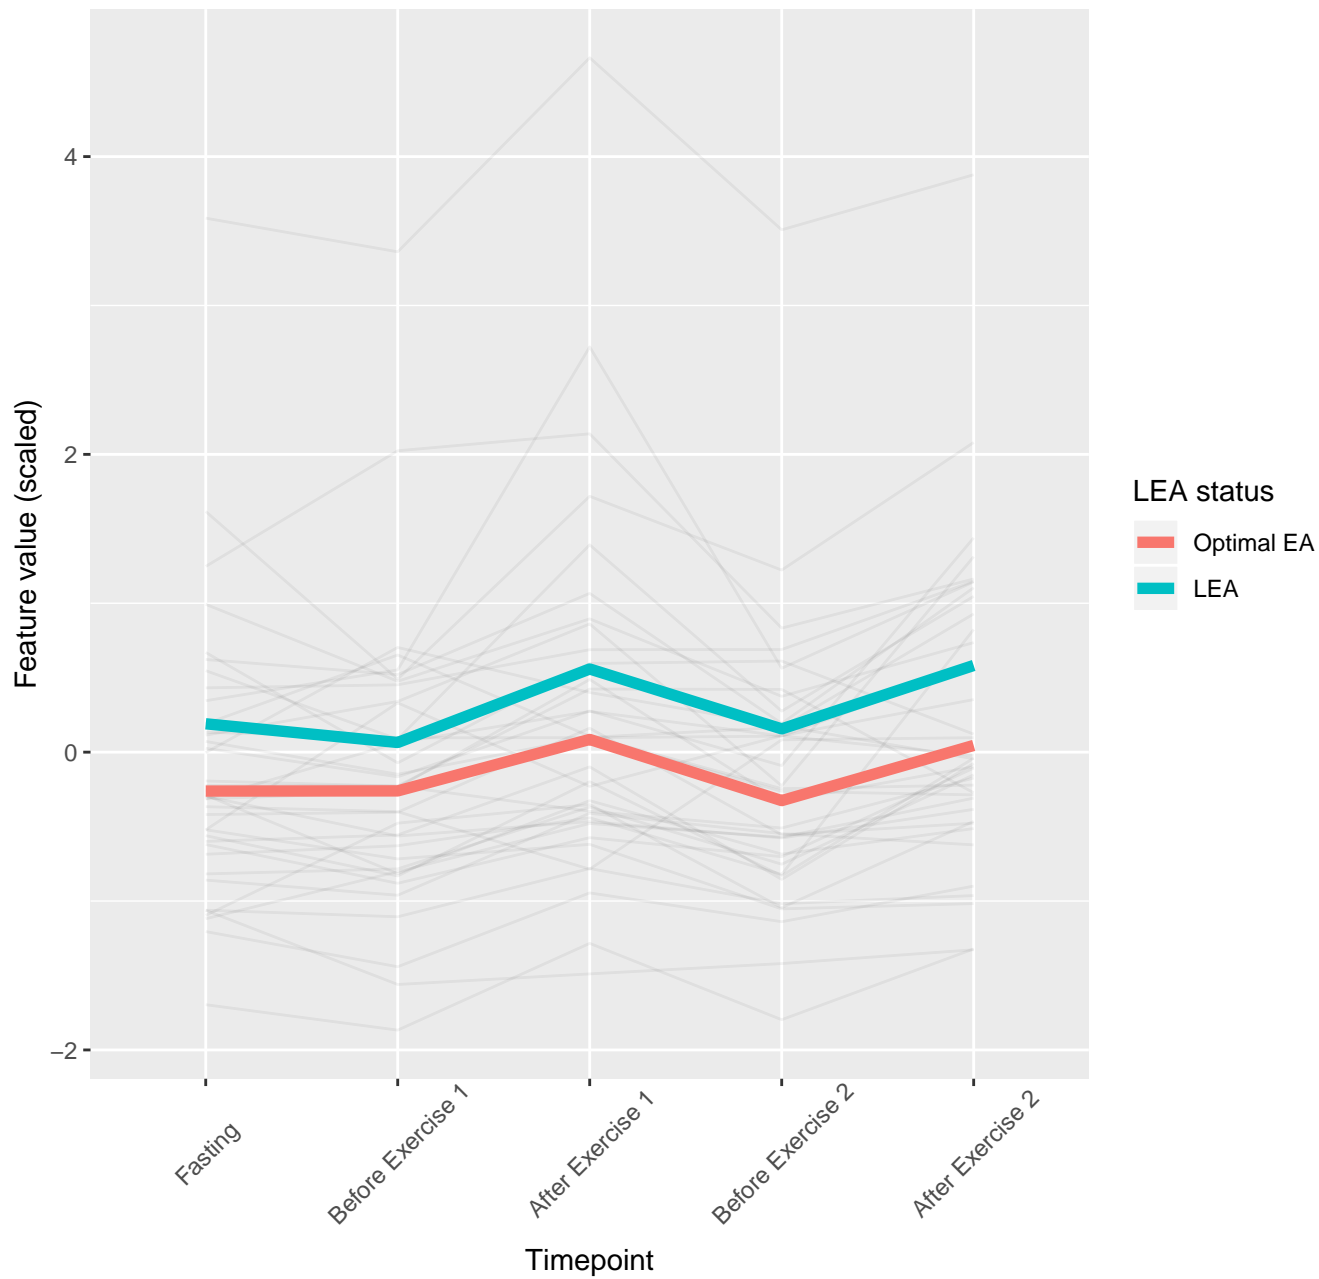



Line plot of SM(d38:0)

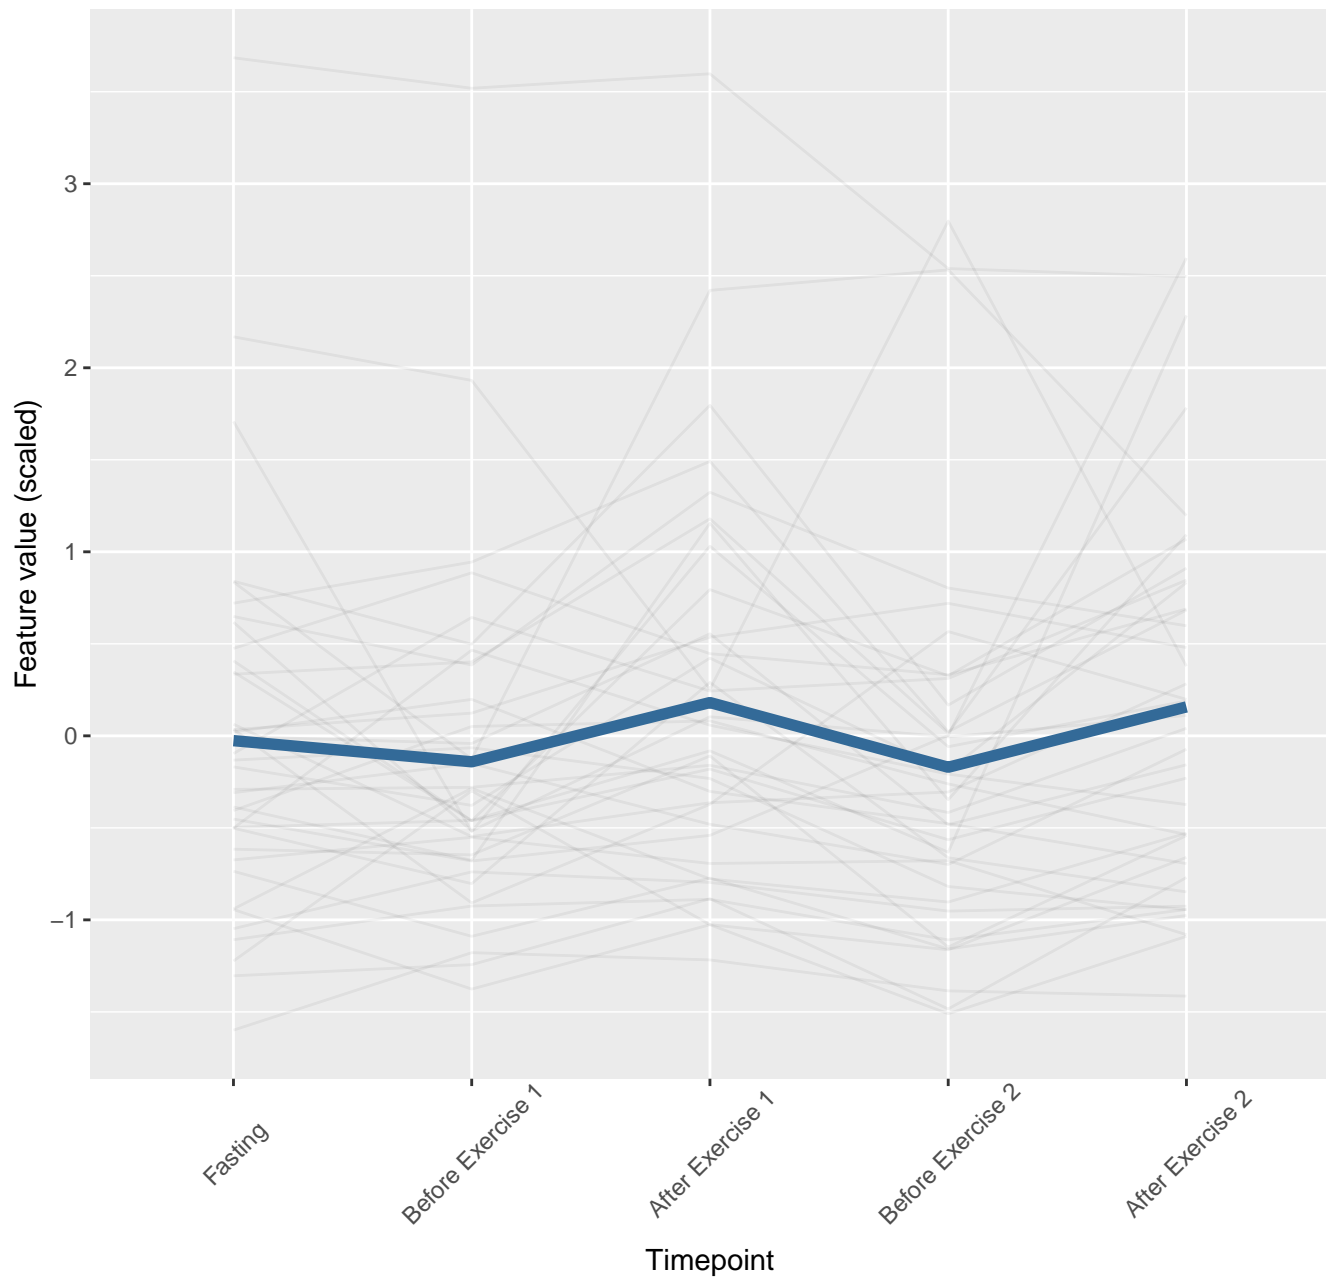

Line plot of SM(d38:0)

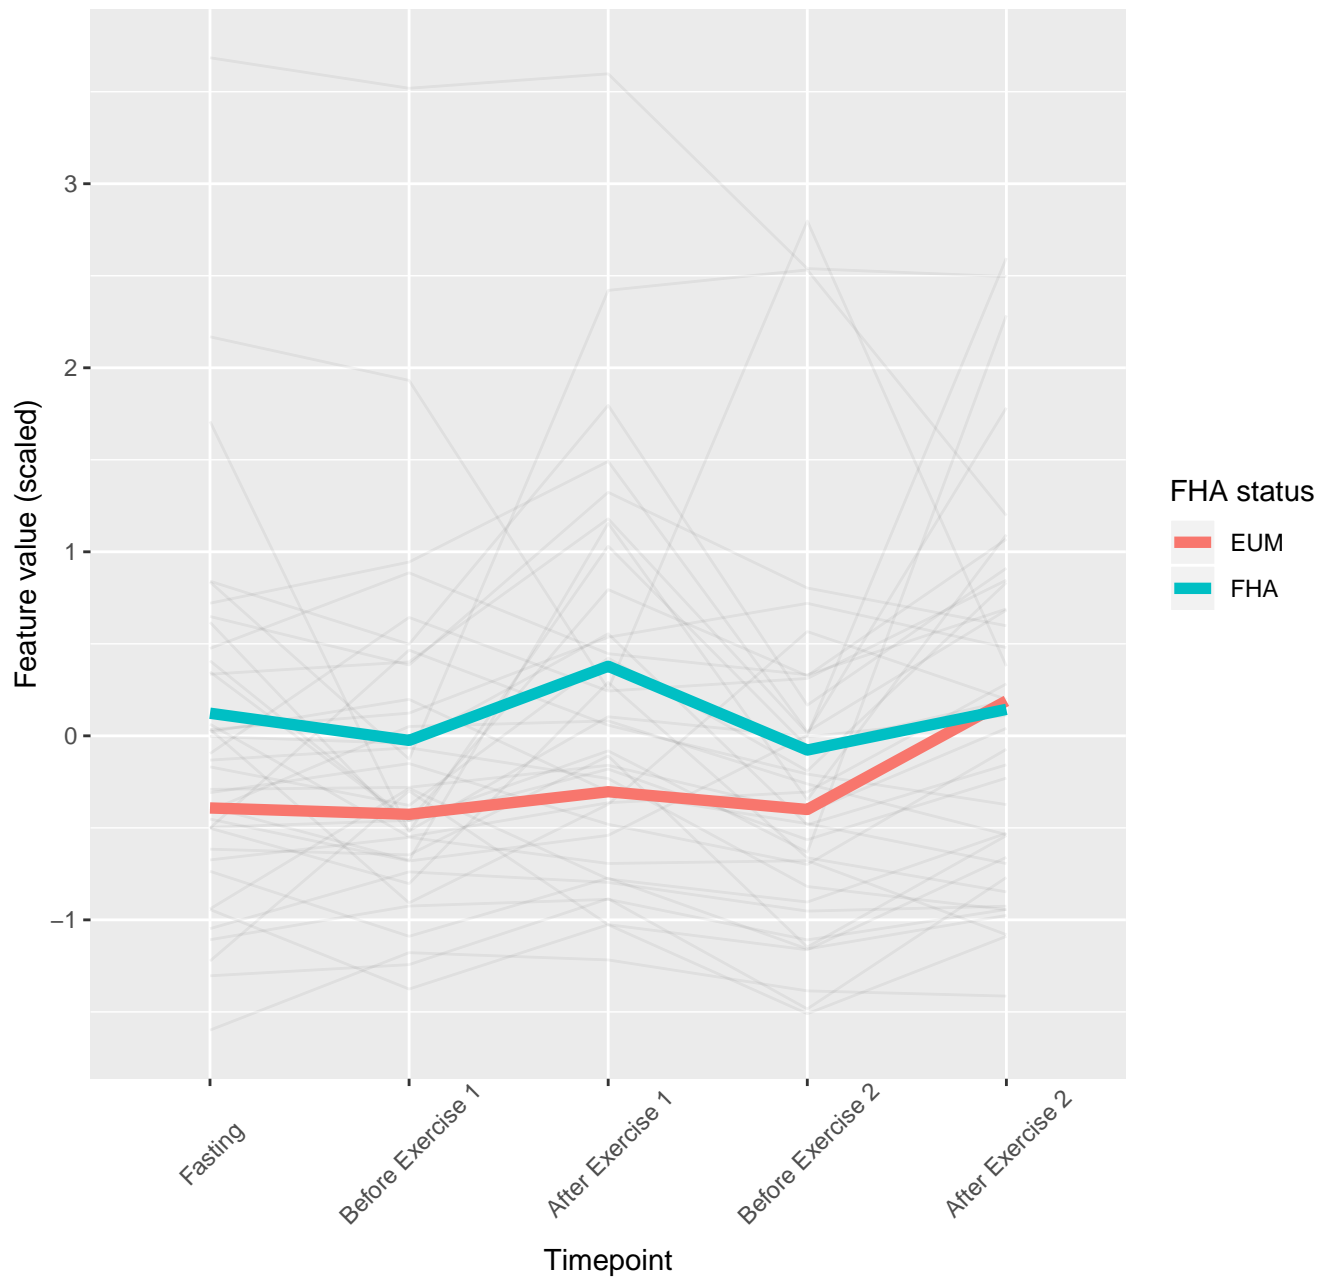

Line plot of SM(d38:0)

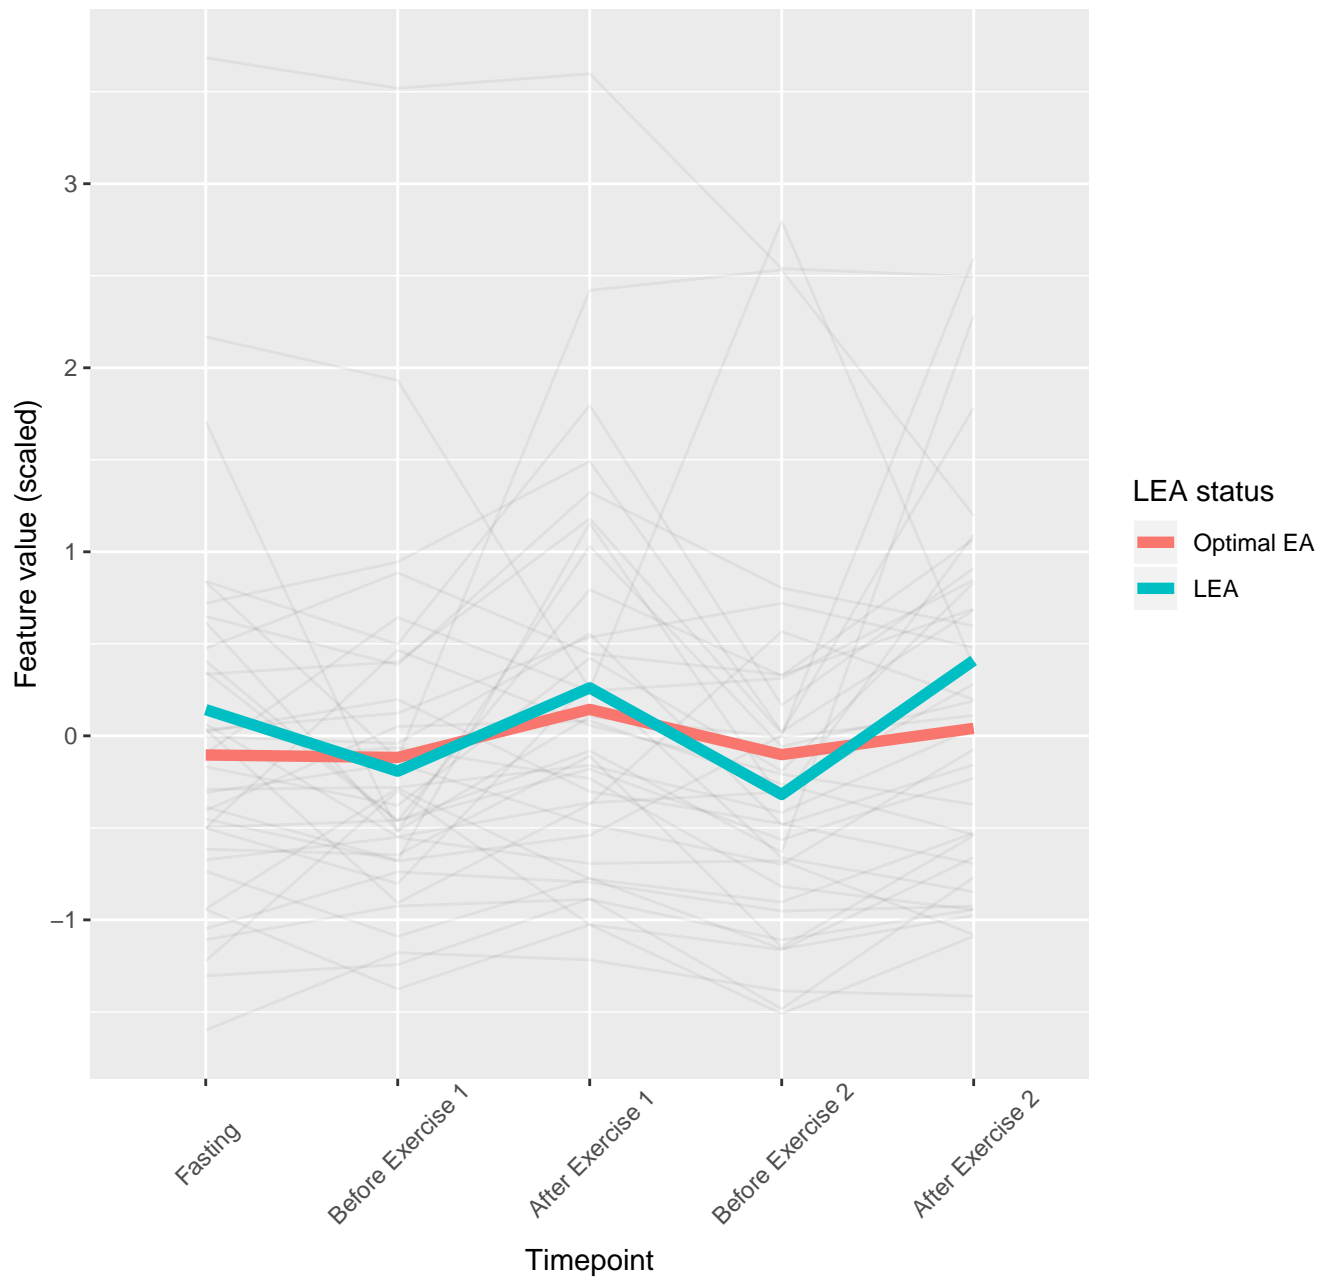

Line plot of SM(d38:1)

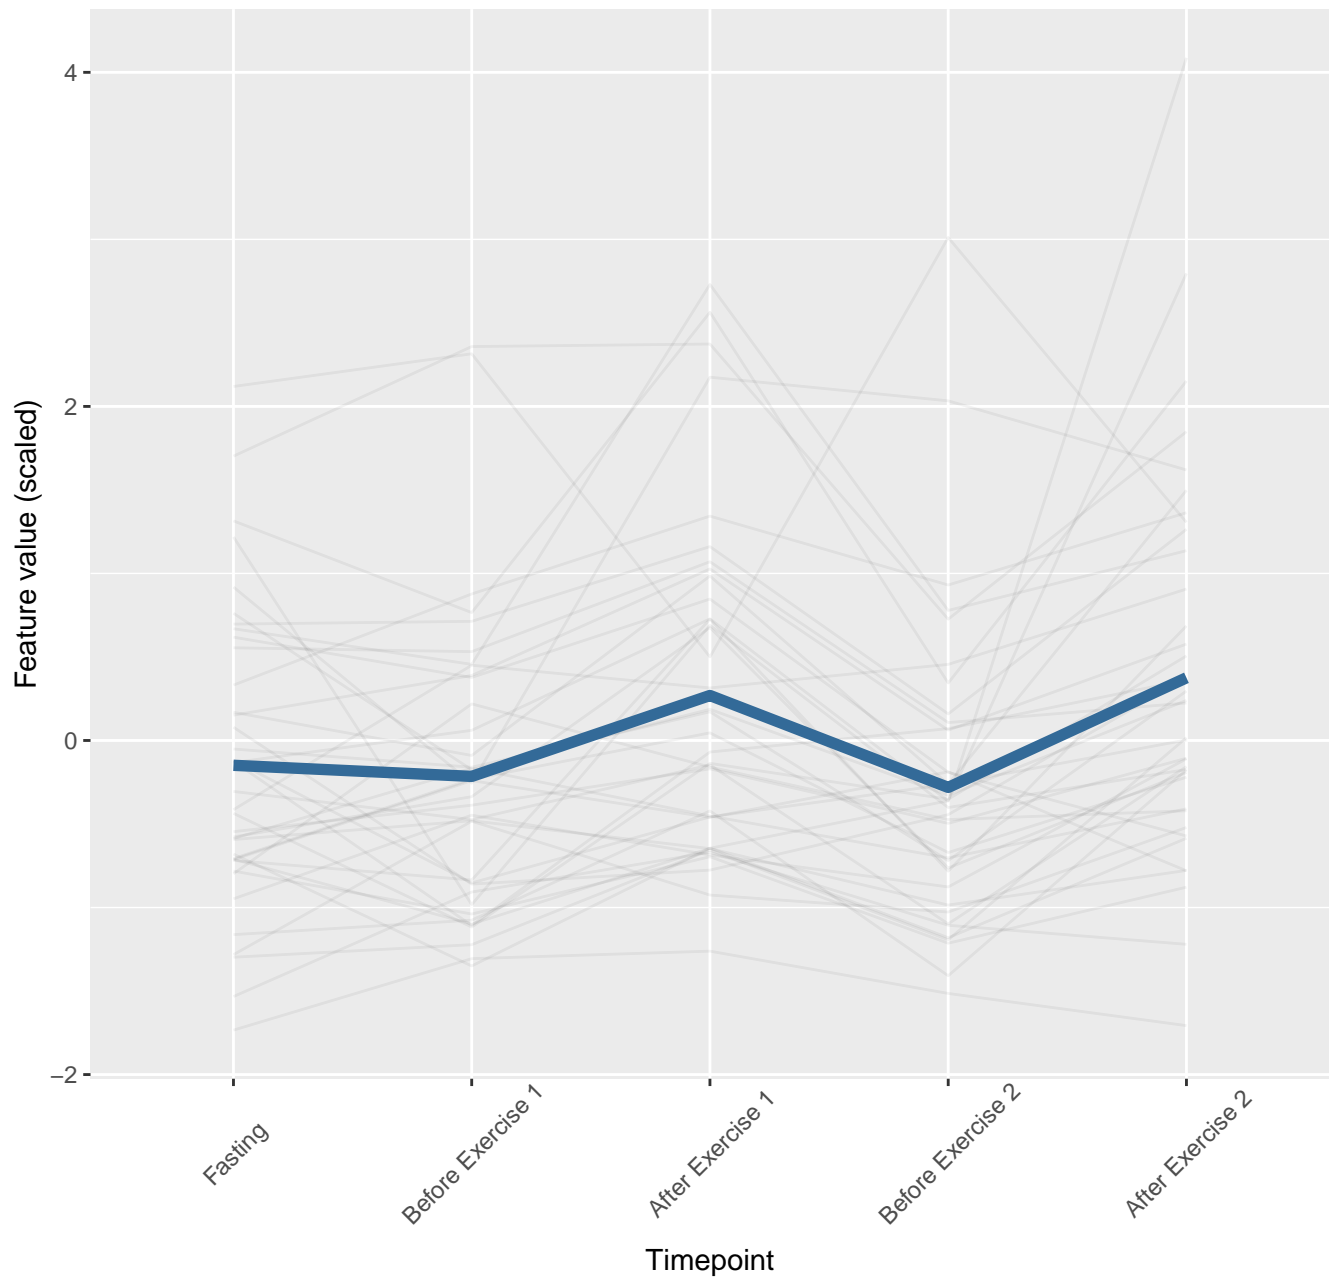

Line plot of SM(d38:1)

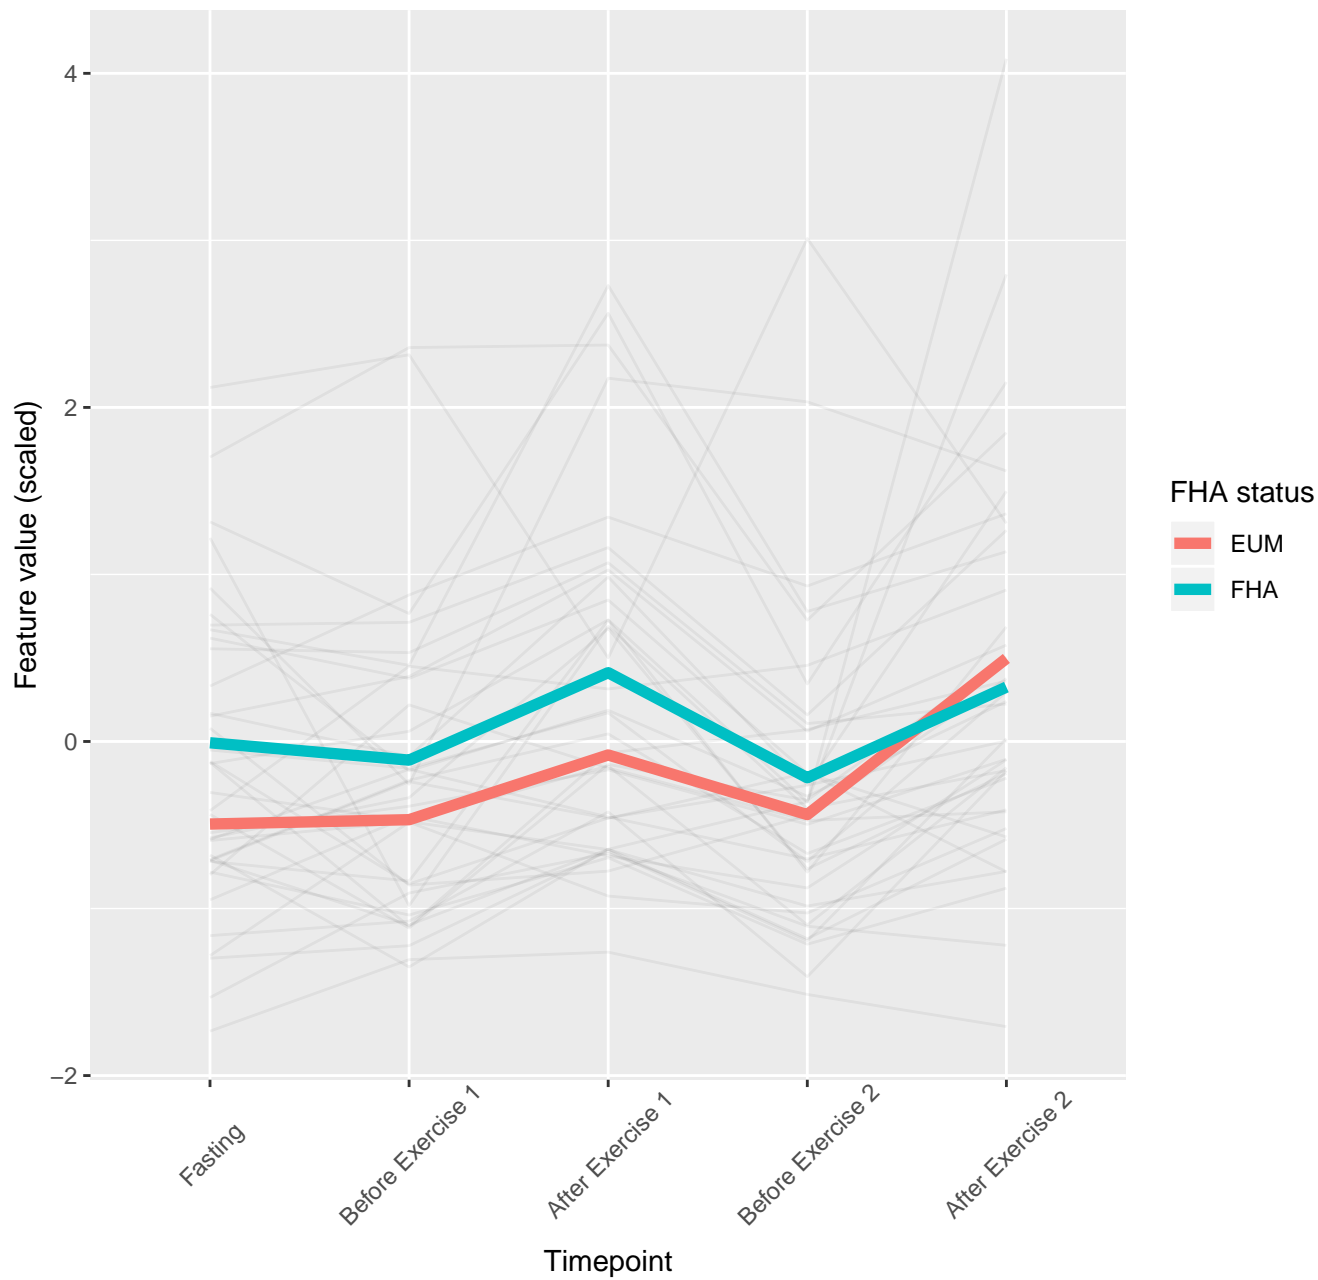

Line plot of SM(d38:1)

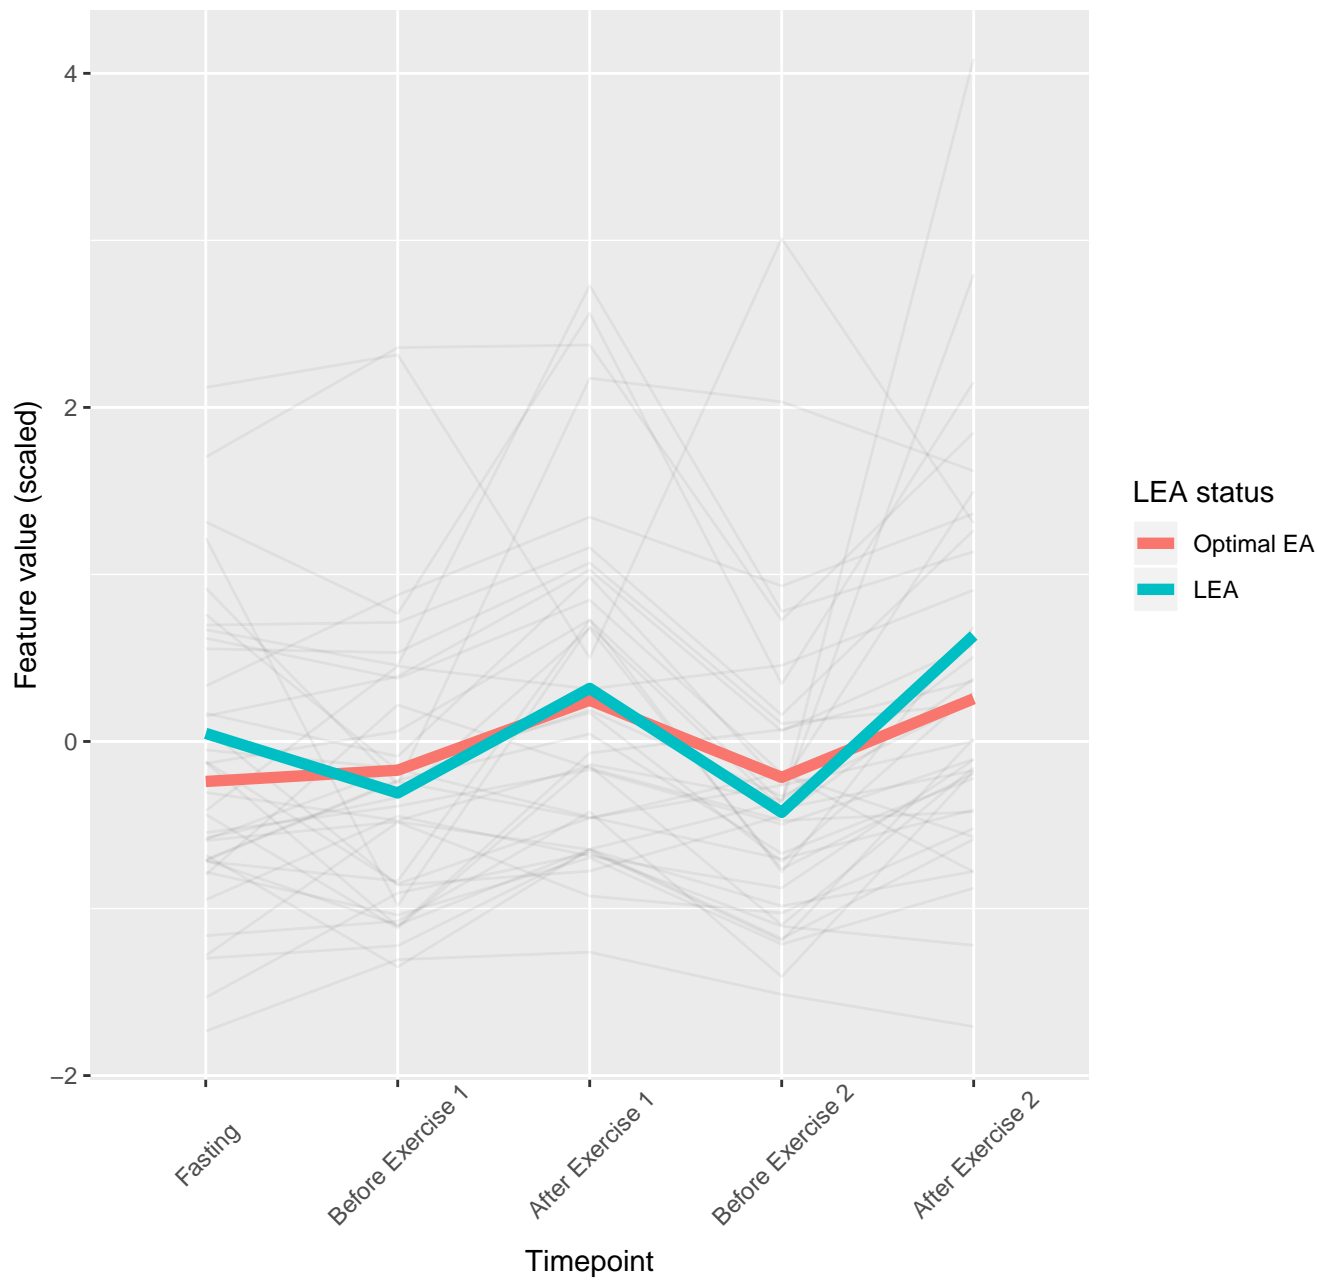

Line plot of SM(d38:2)

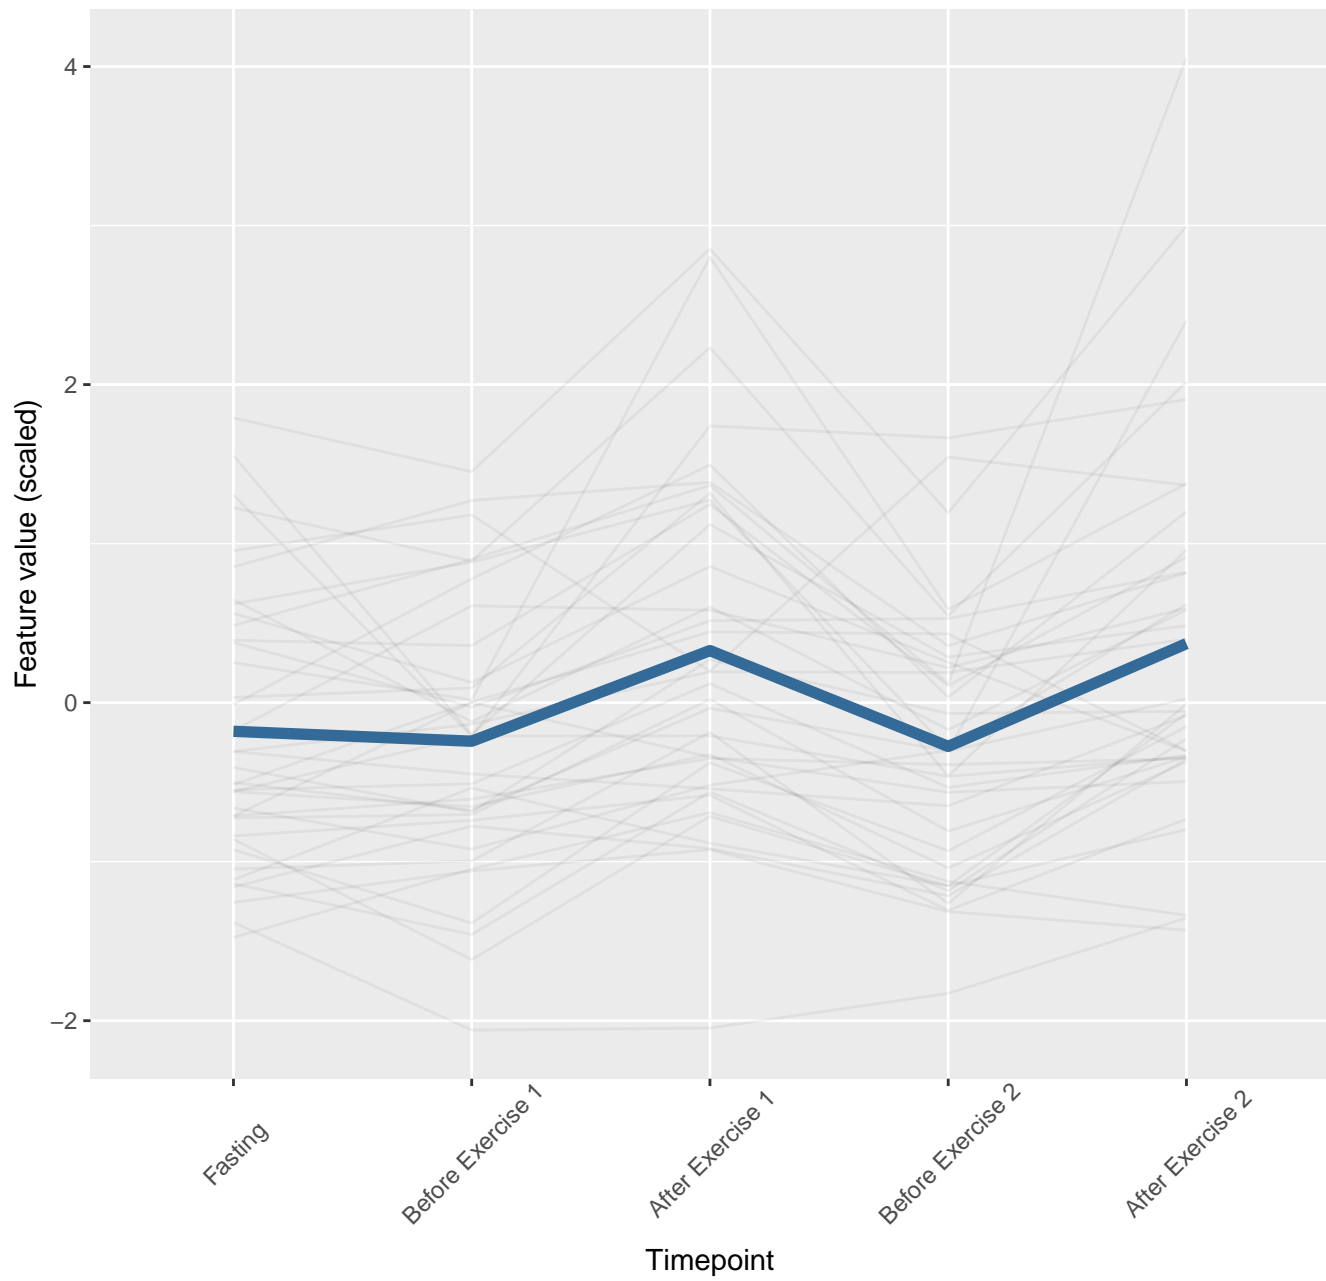

Line plot of SM(d38:2)

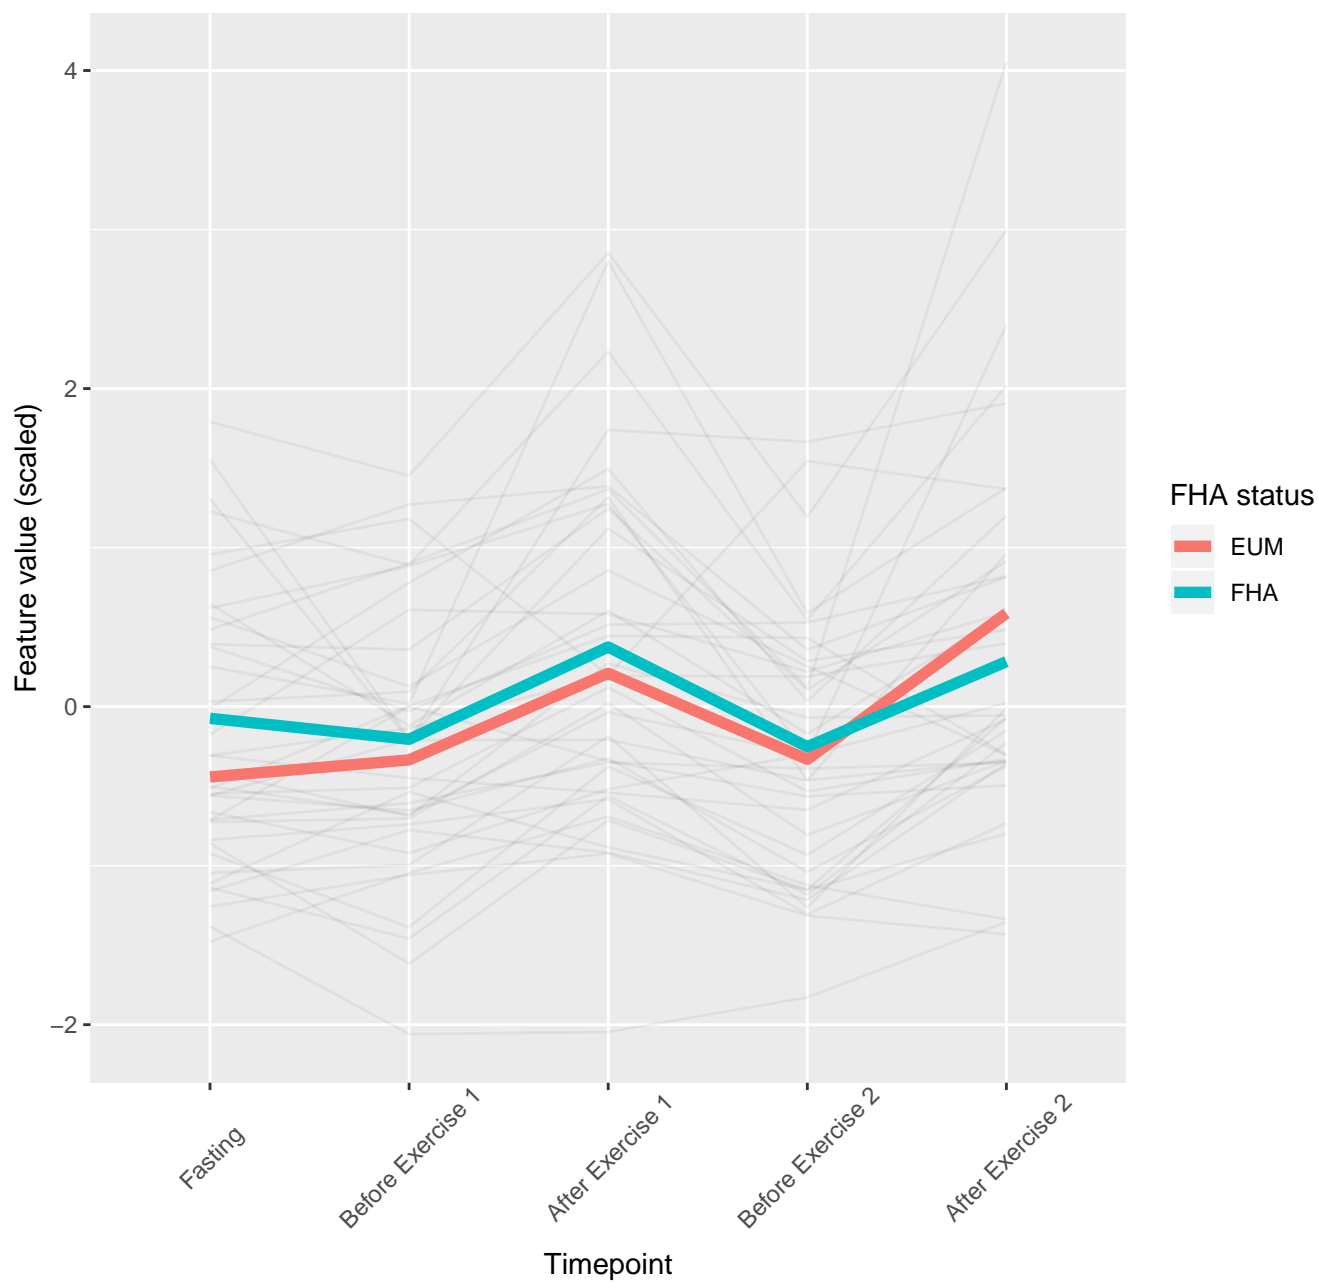



Line plot of SM(d38:2)

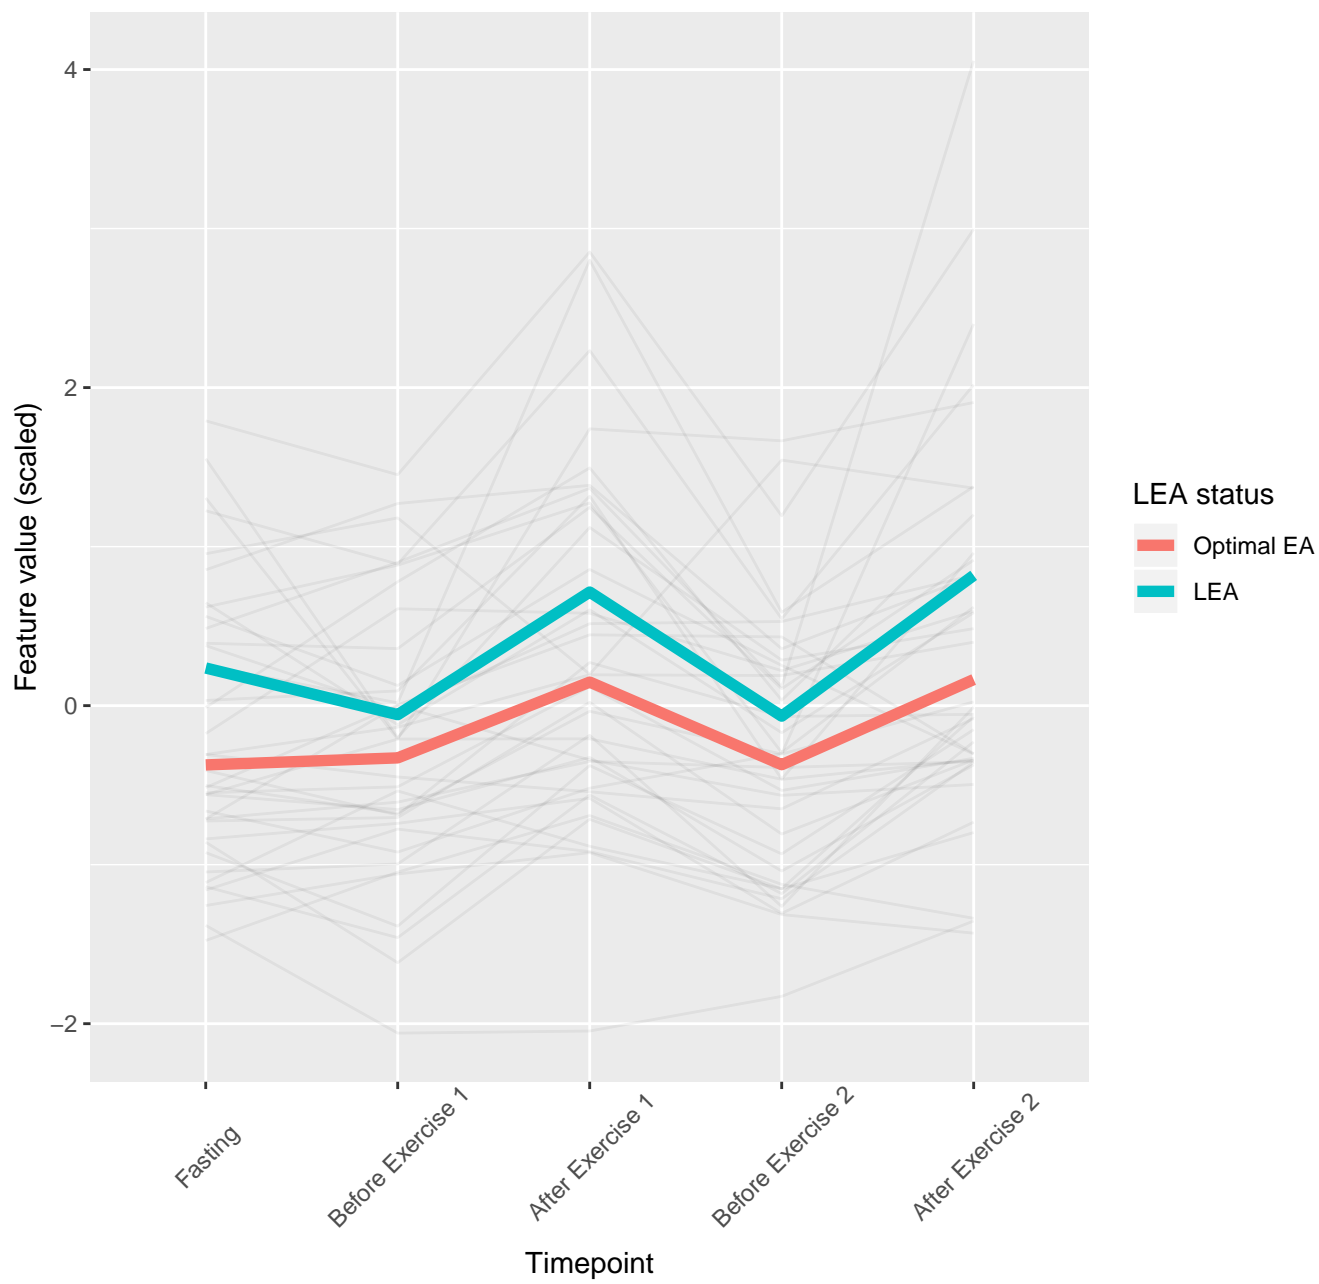

Line plot of SM(d39:1)

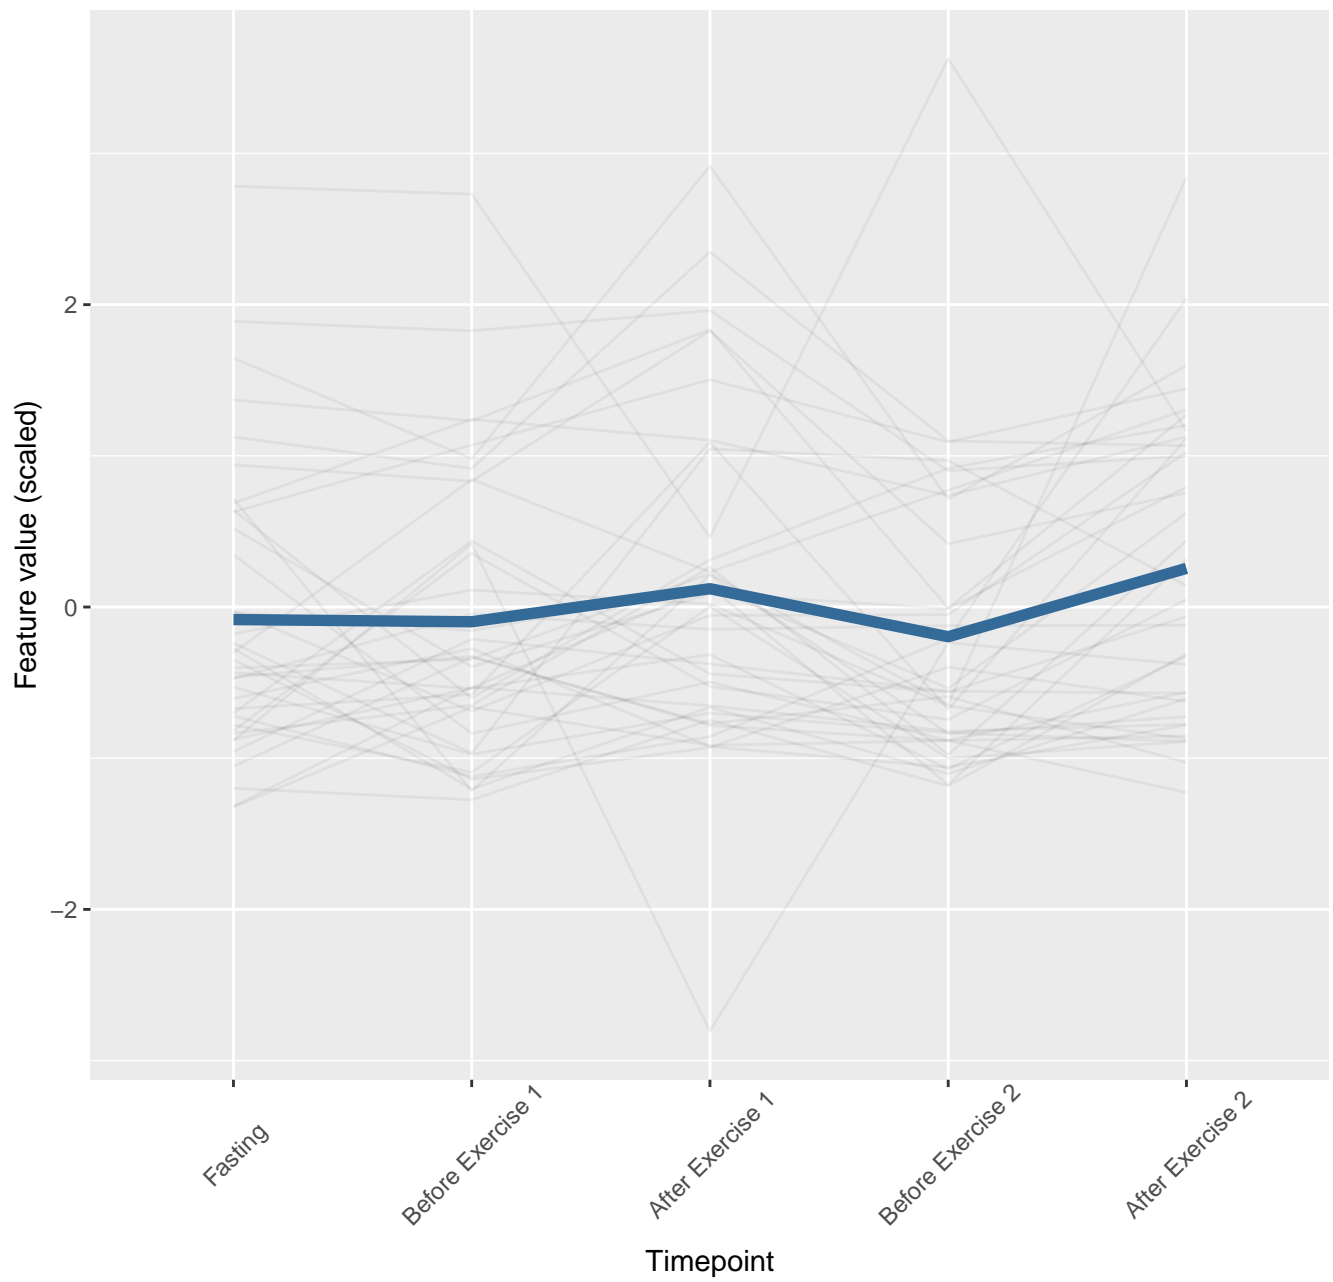

Line plot of SM(d39:1)

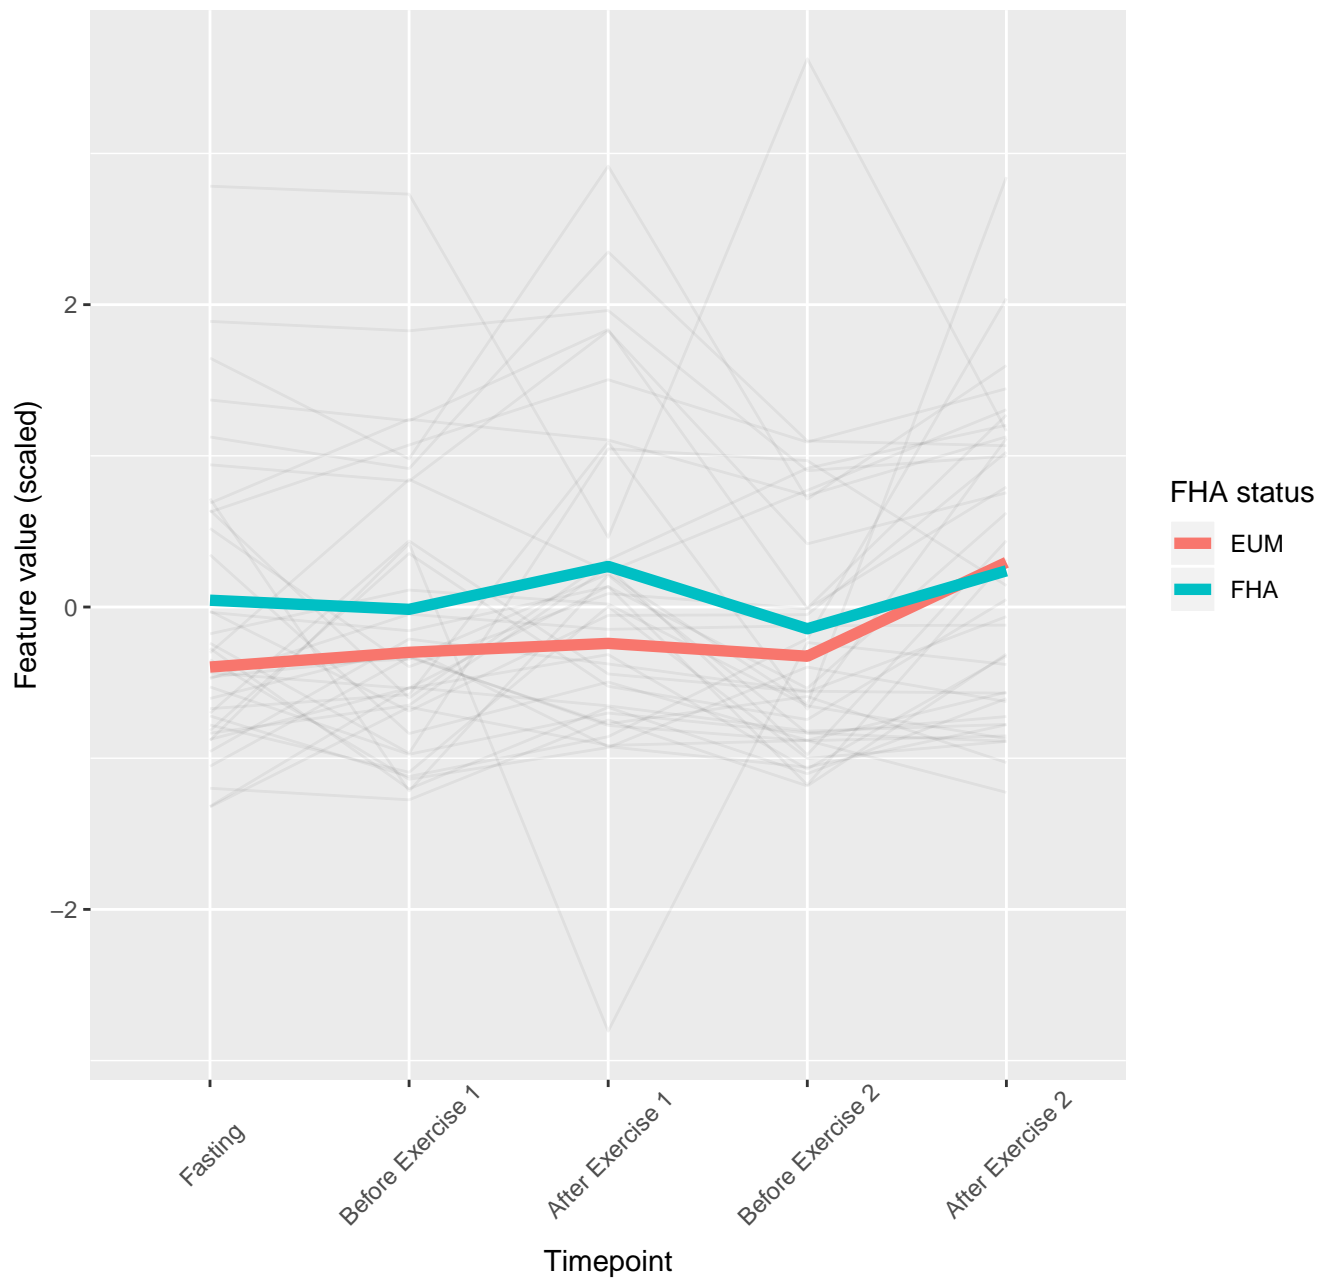

Line plot of SM(d39:1)

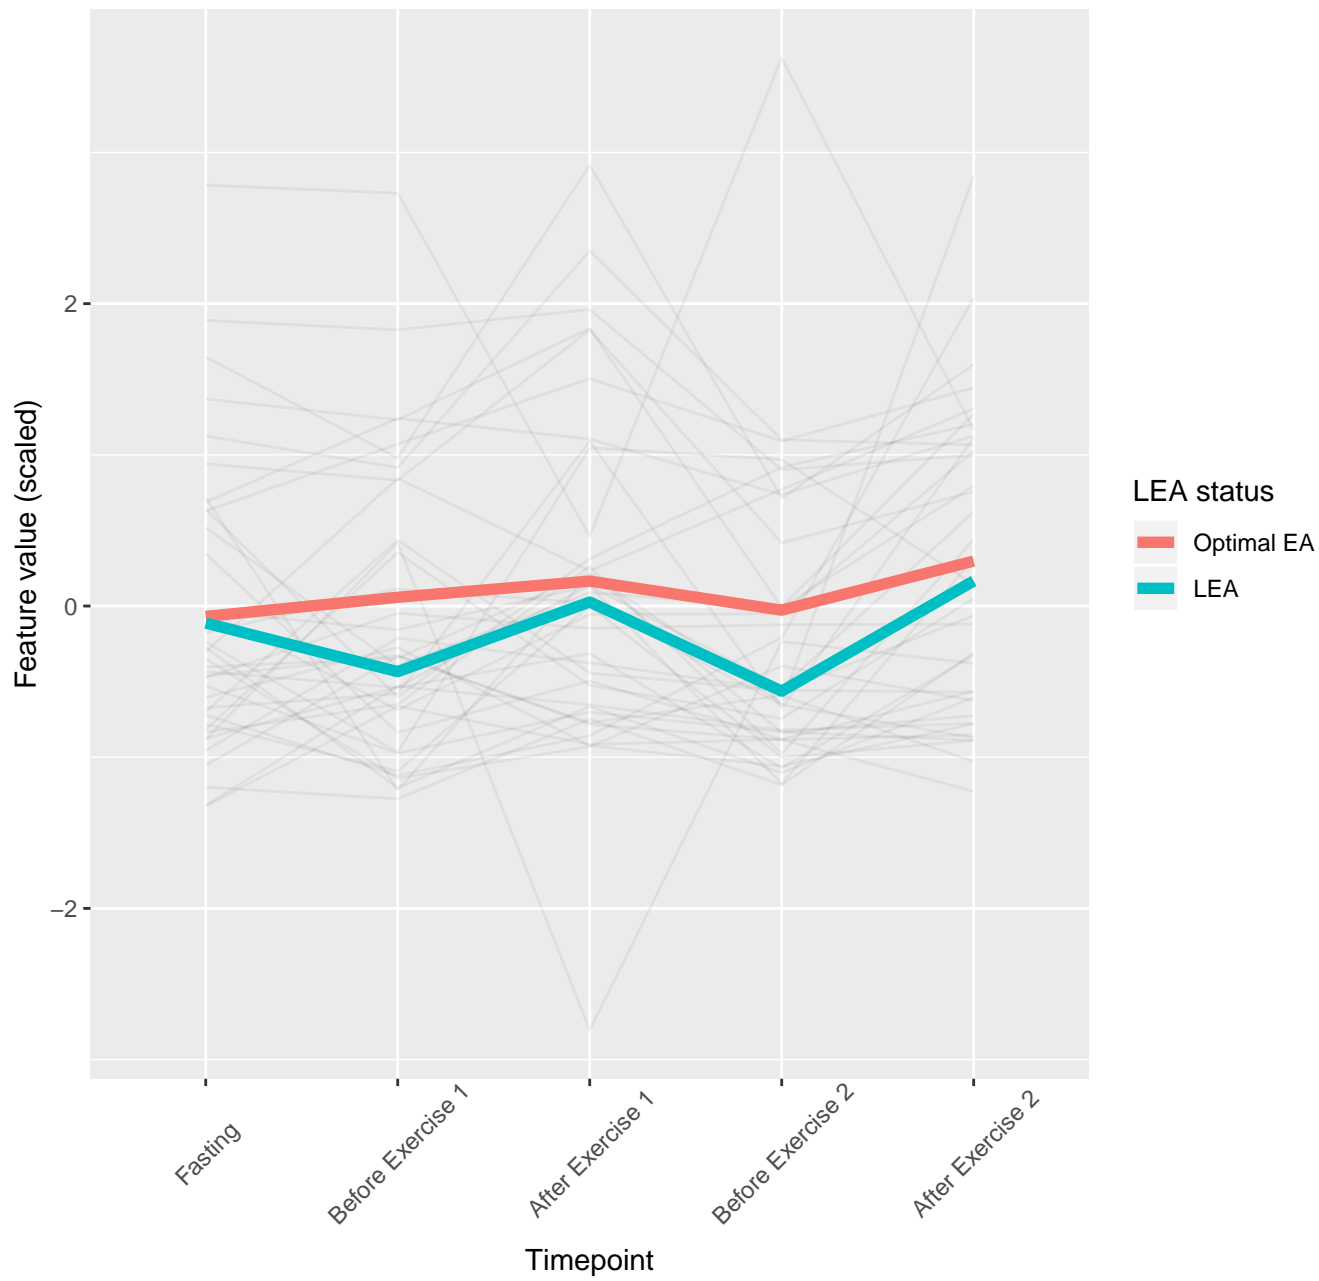

Line plot of SM(d40:1)

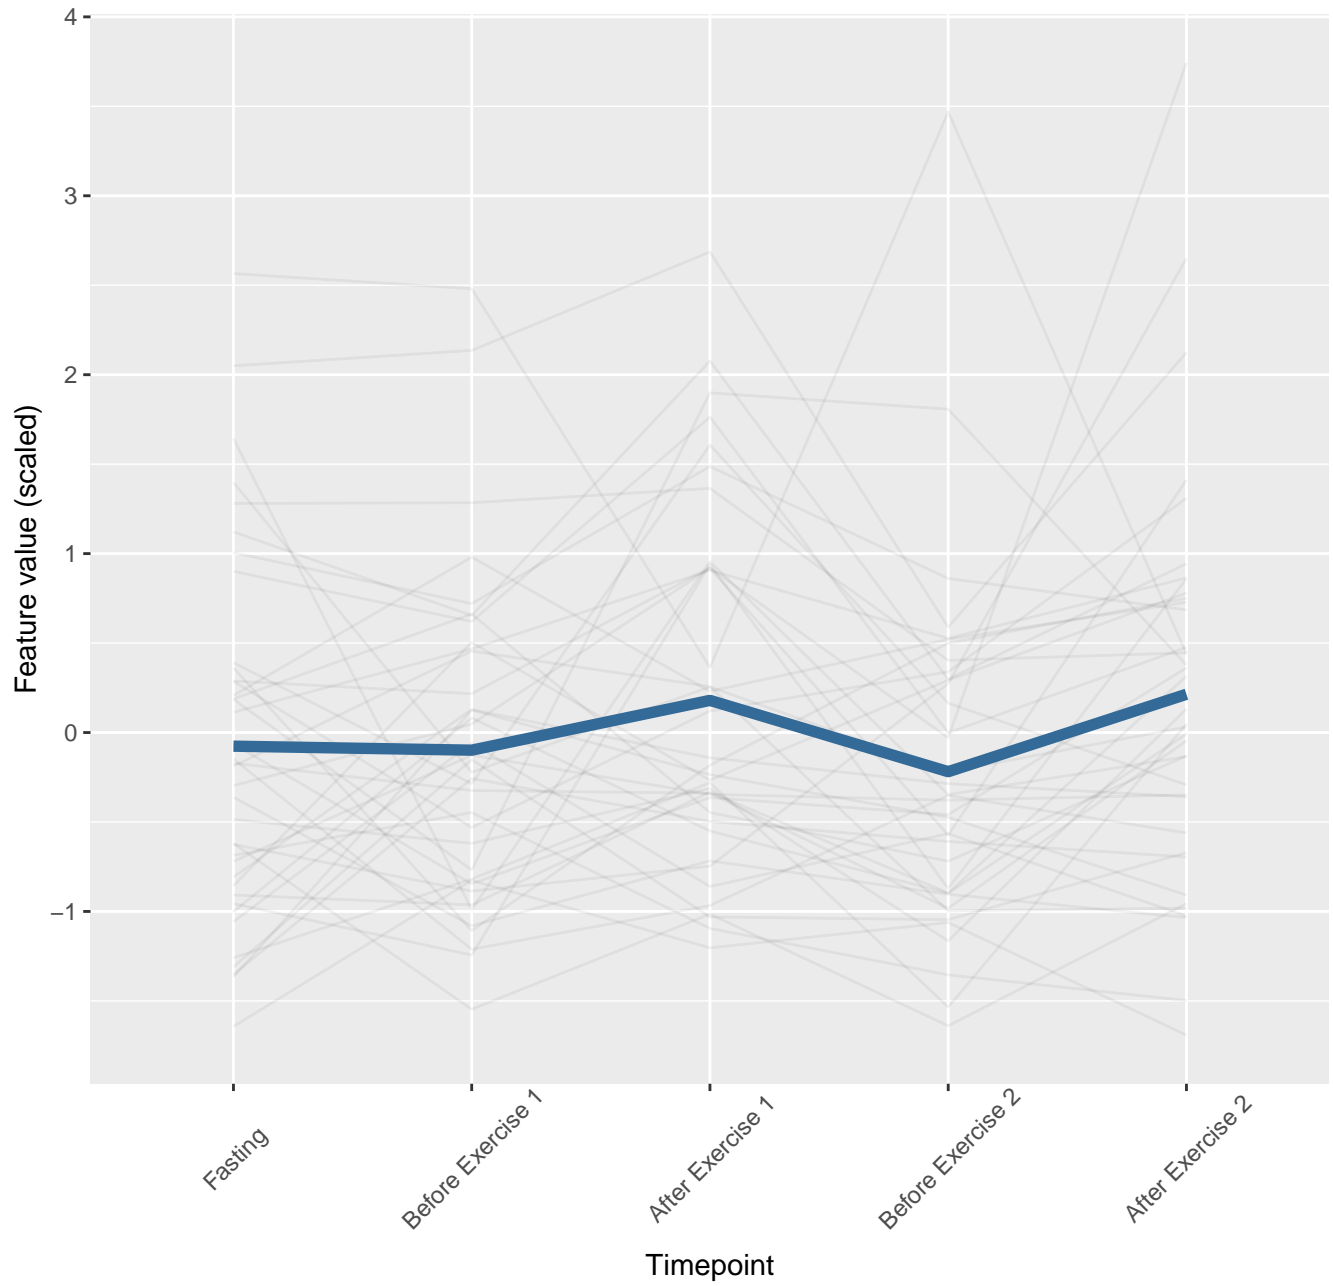

Line plot of SM(d40:1)

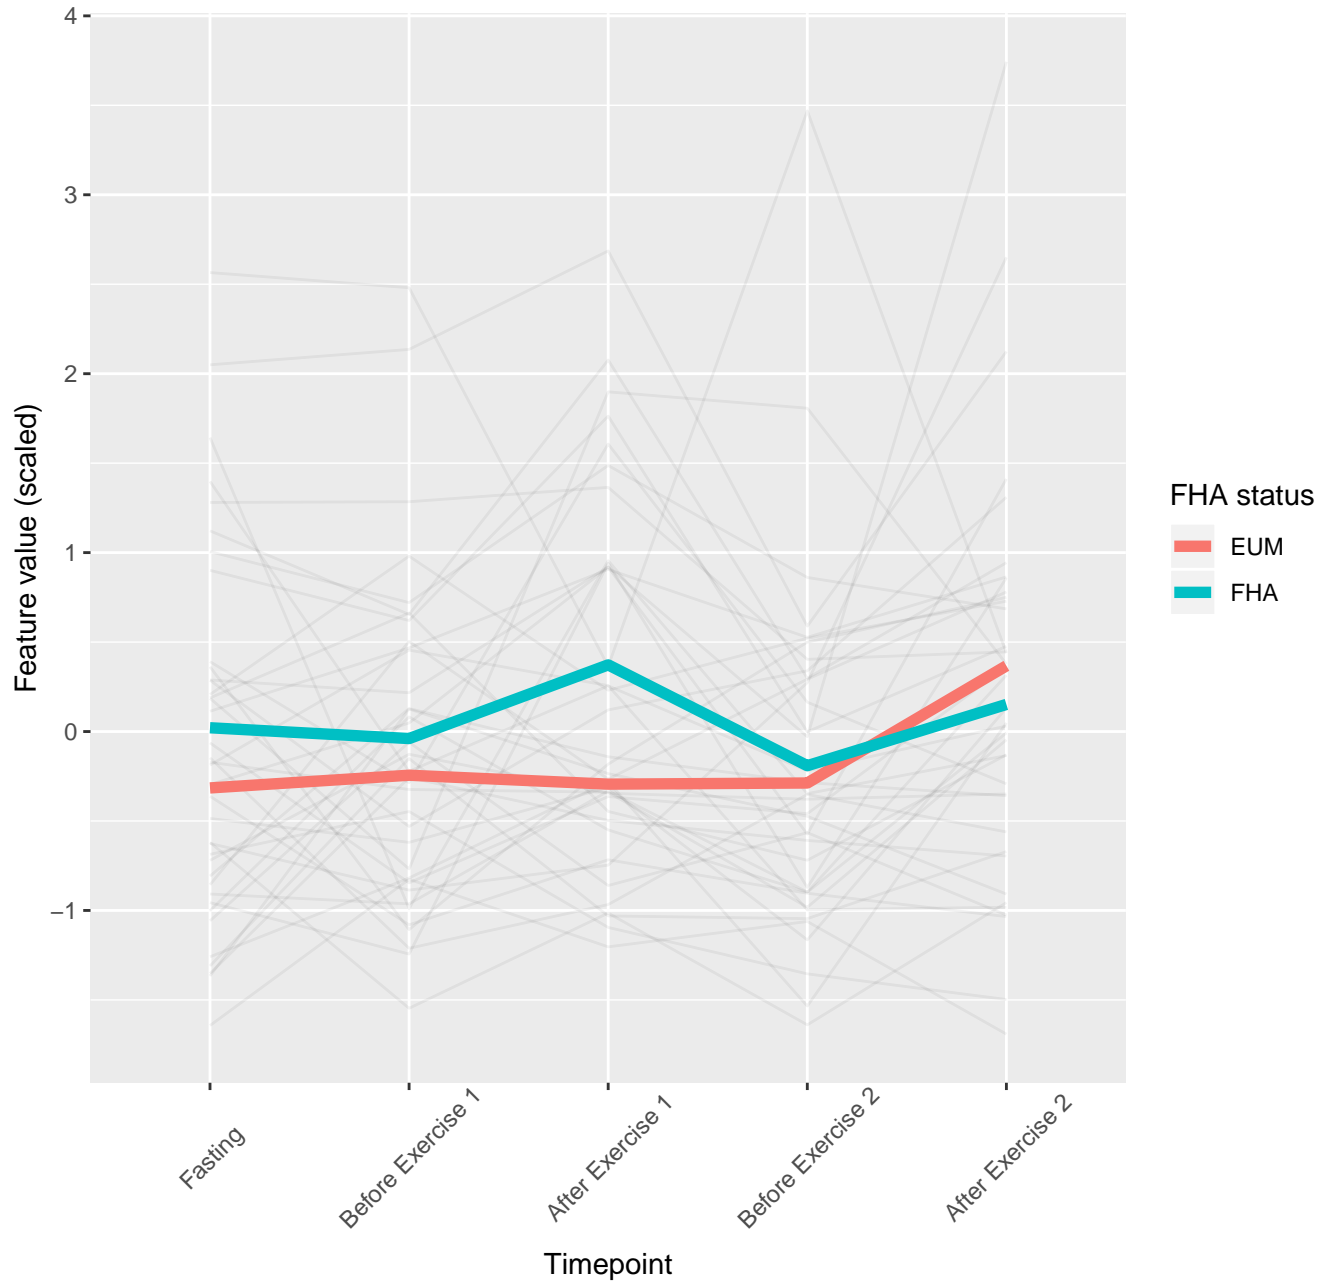

Line plot of SM(d40:1)

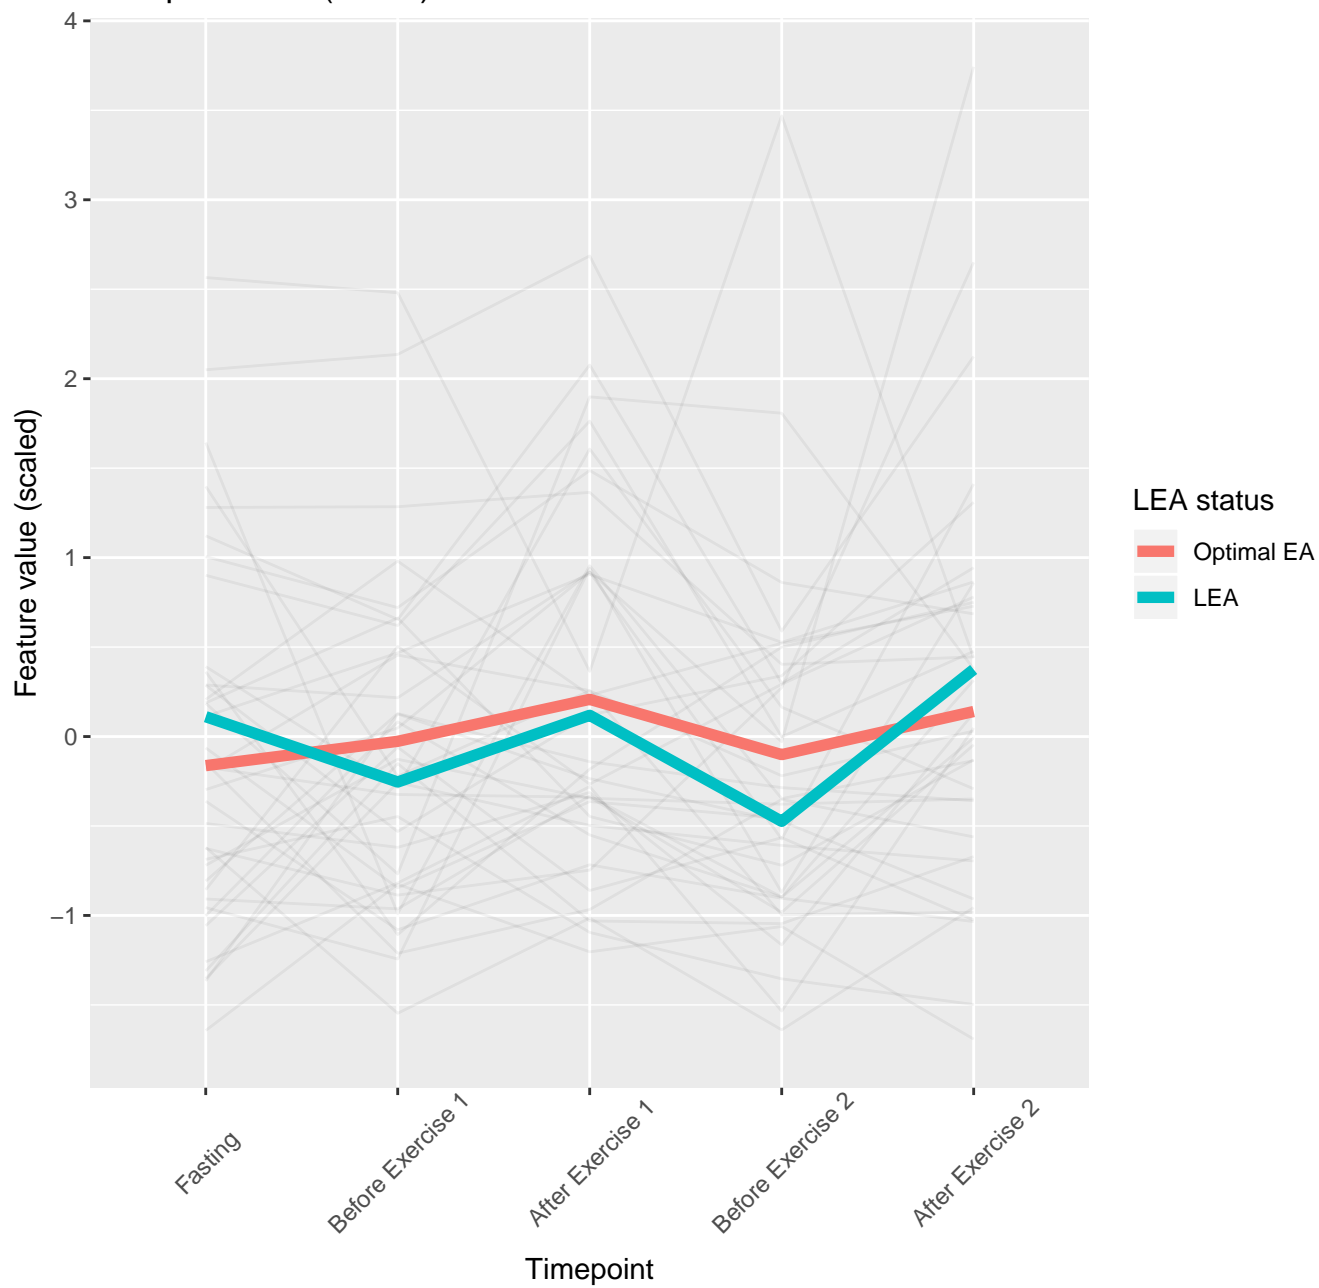

Line plot of SM(d40:2)

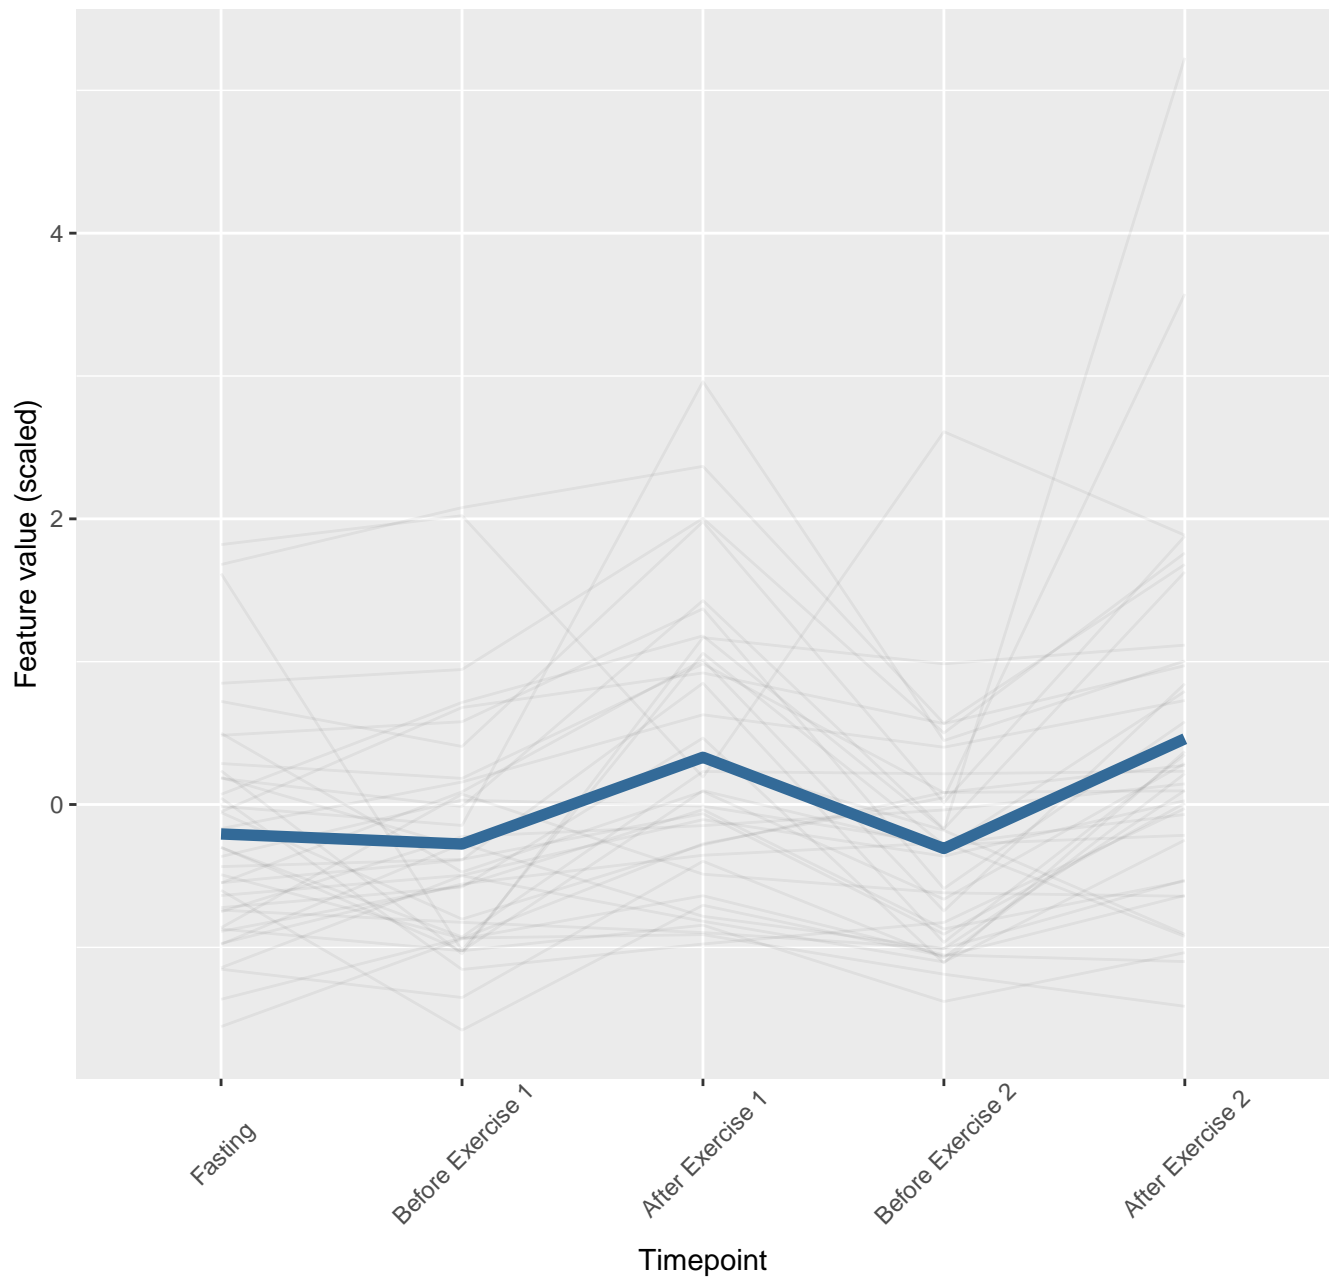



Line plot of SM(d40:2)

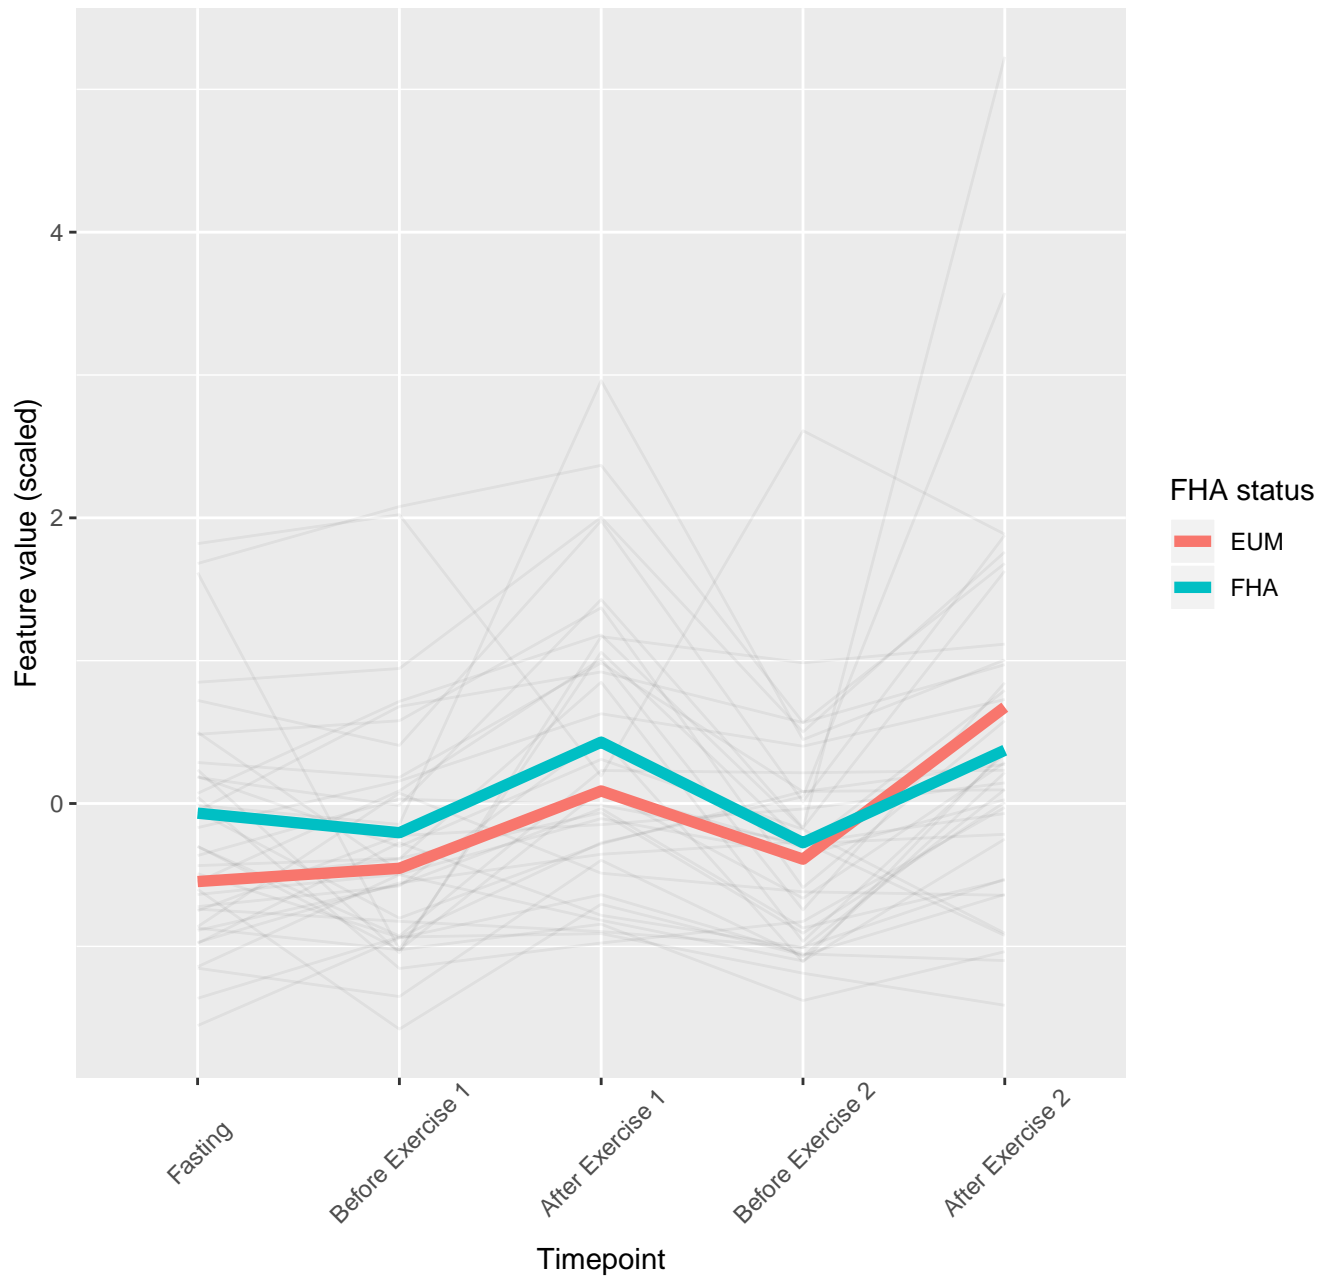

Line plot of SM(d40:2)

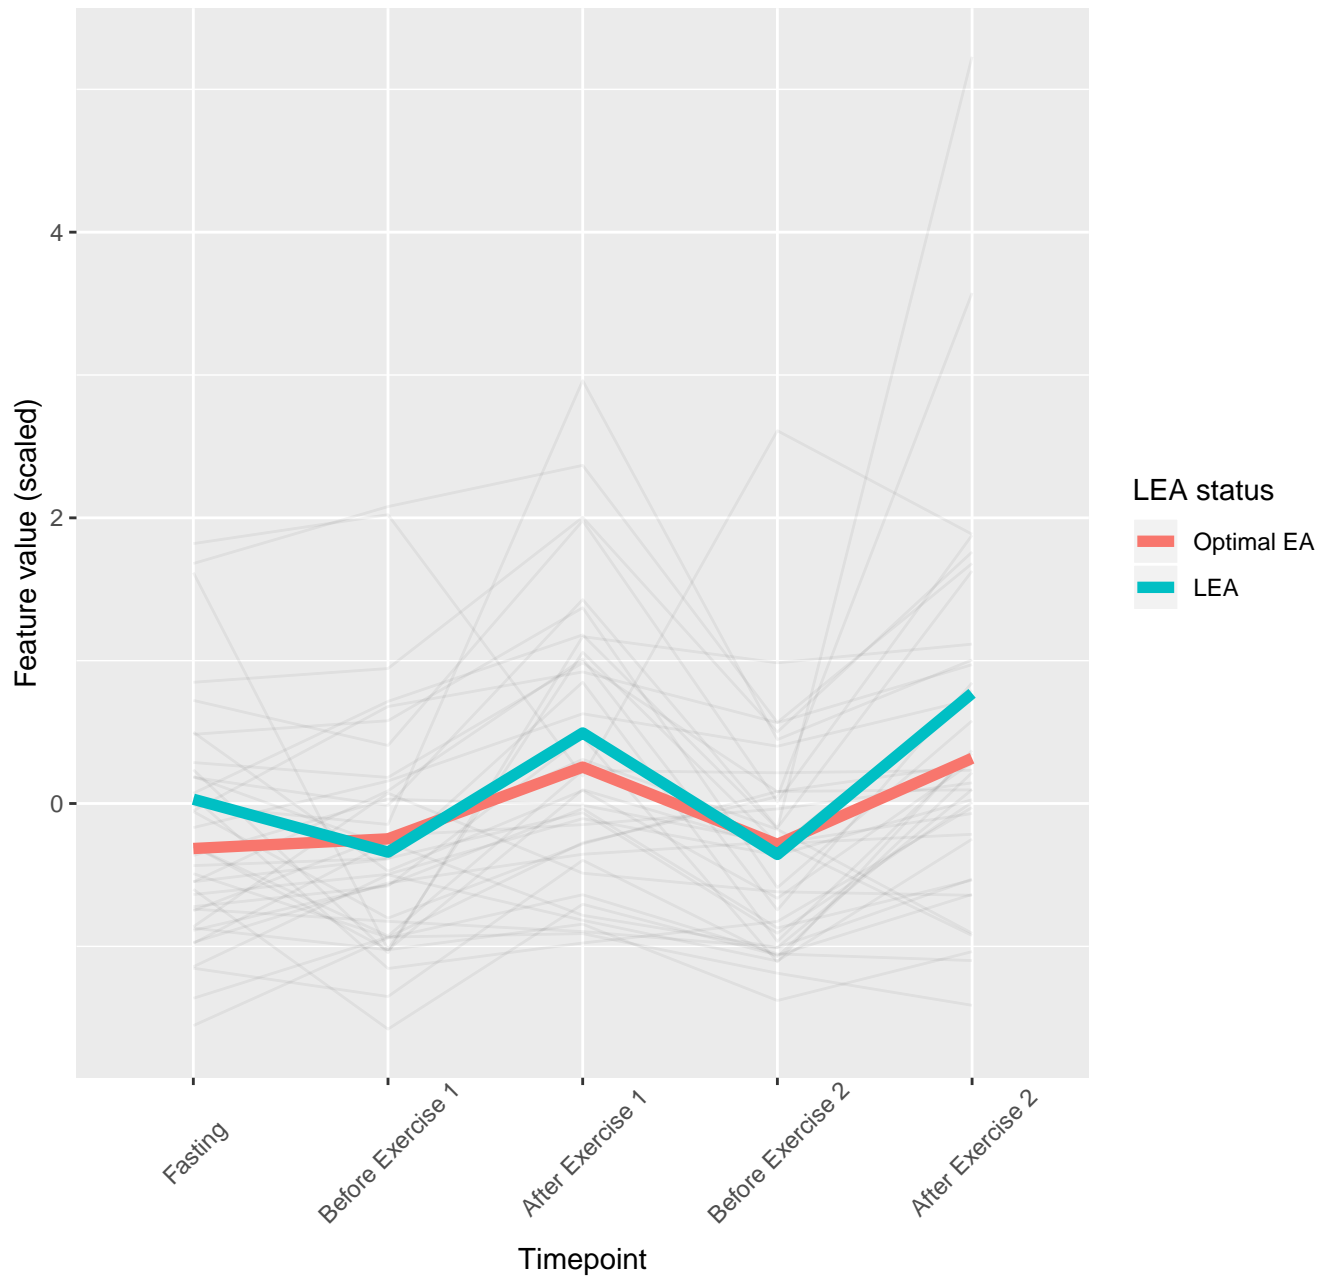

Line plot of SM(d41:1)

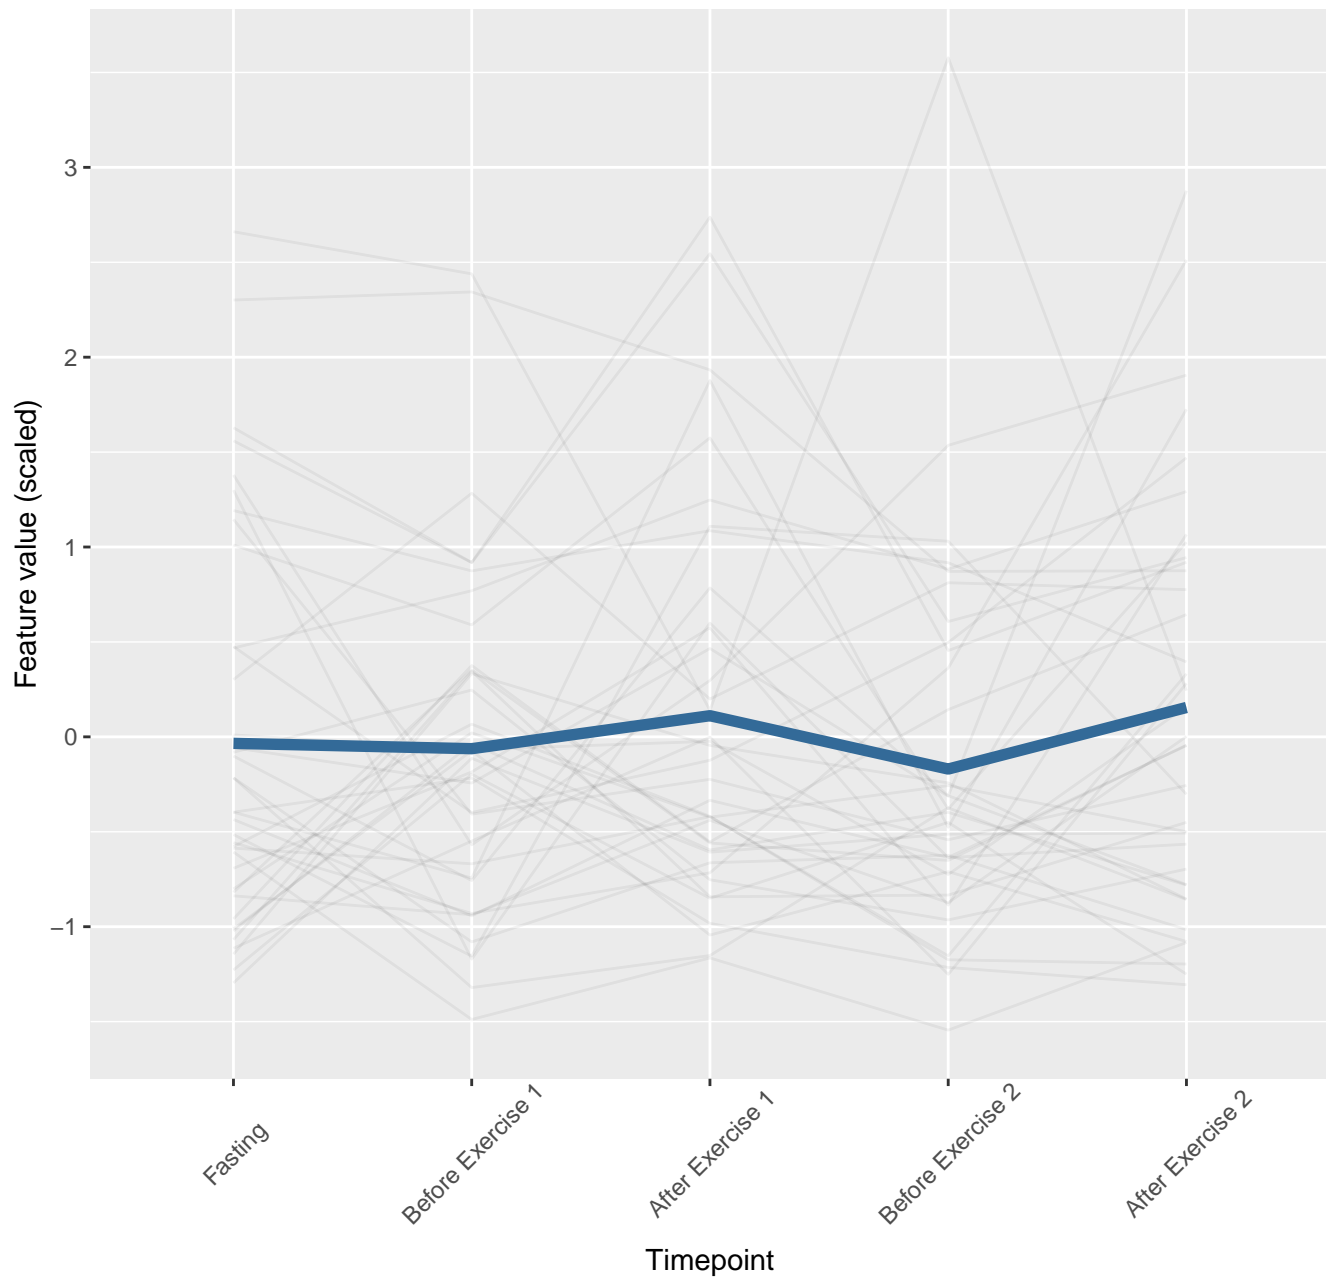

Line plot of SM(d41:1)

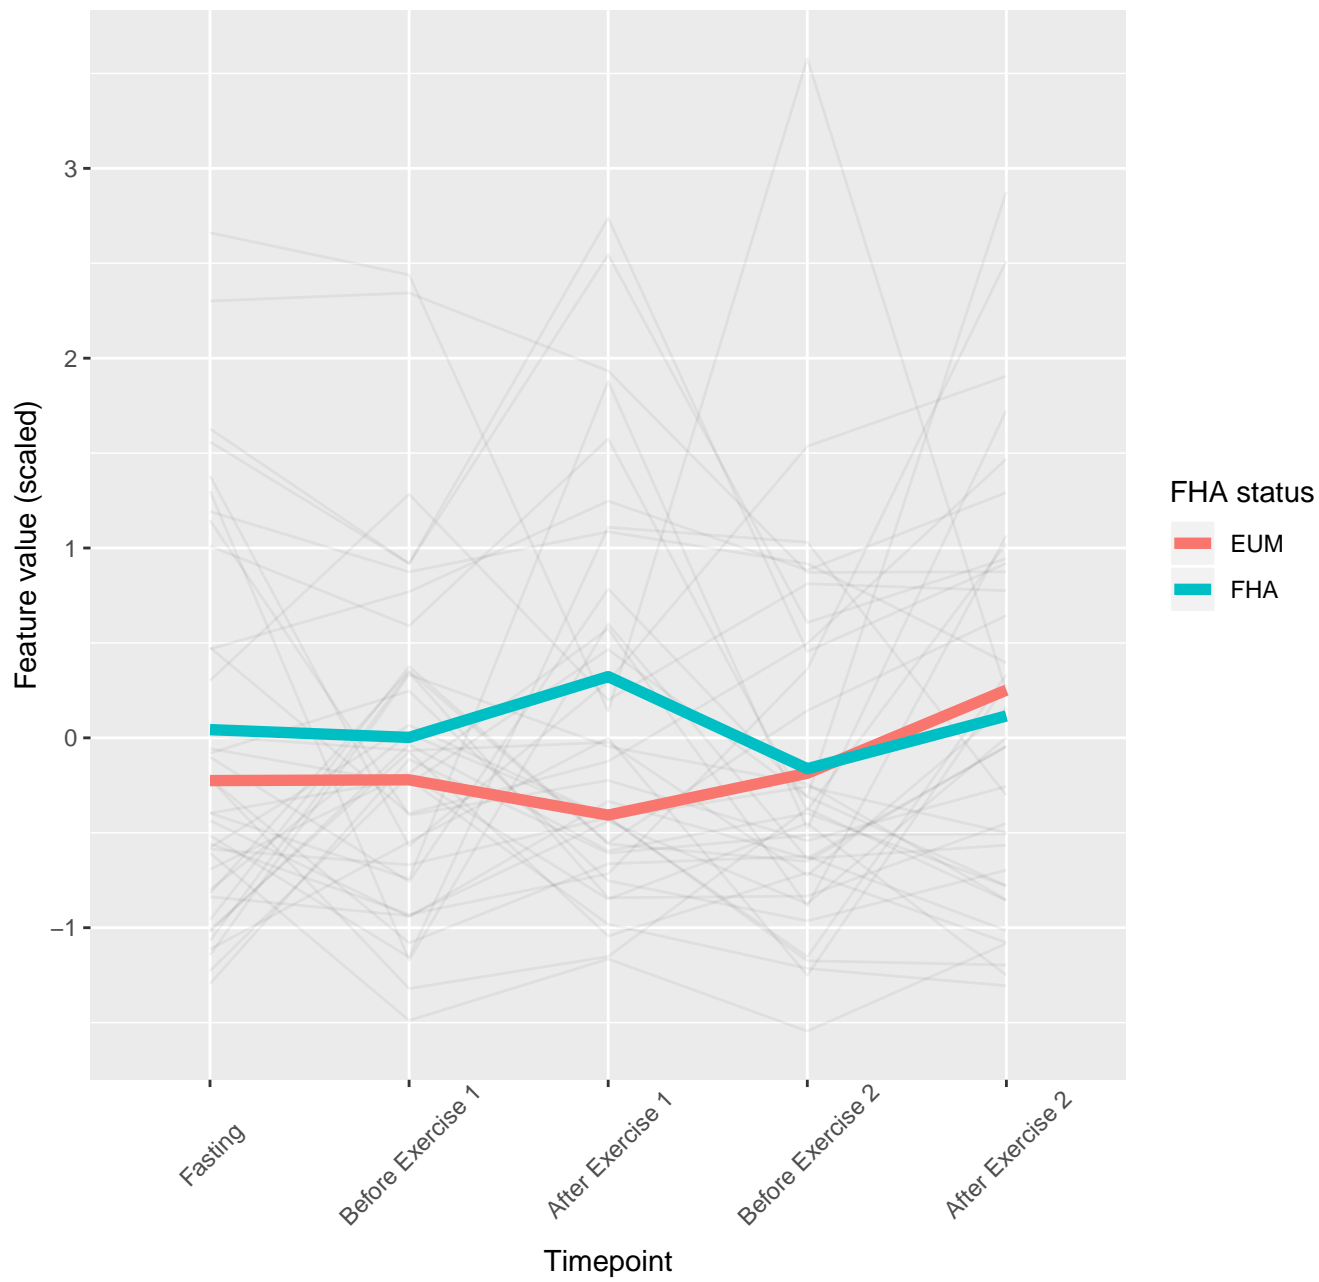

Line plot of SM(d41:1)

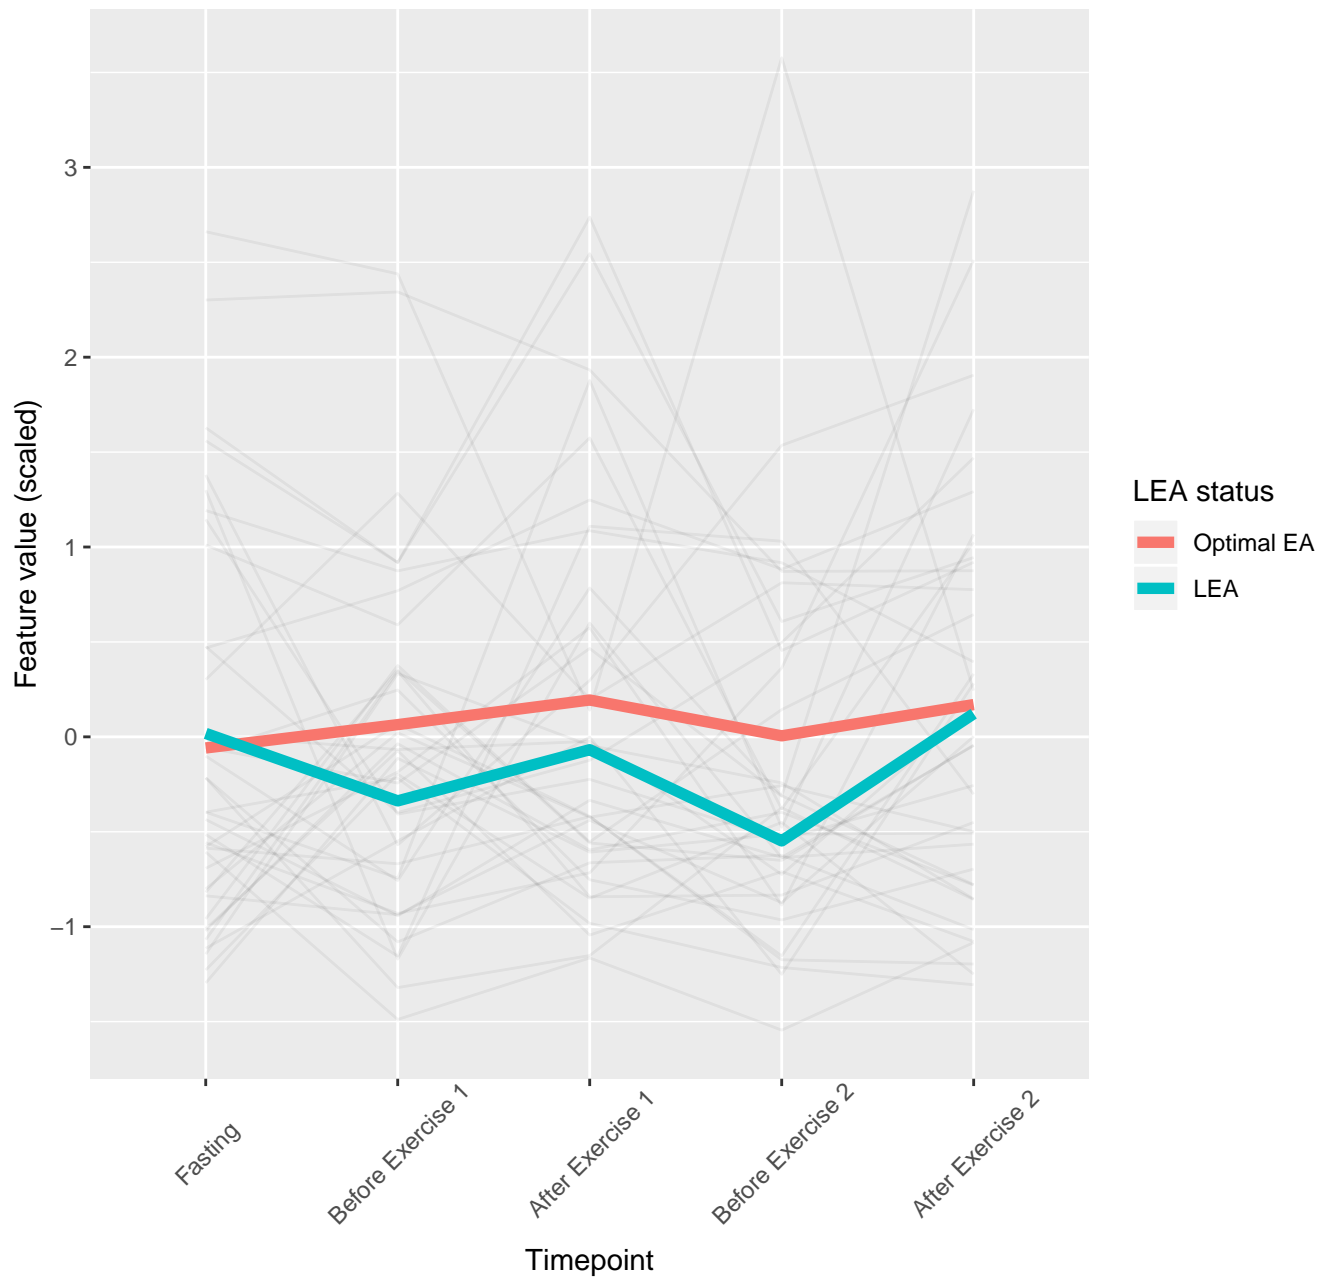

Line plot of SM(d41:2)

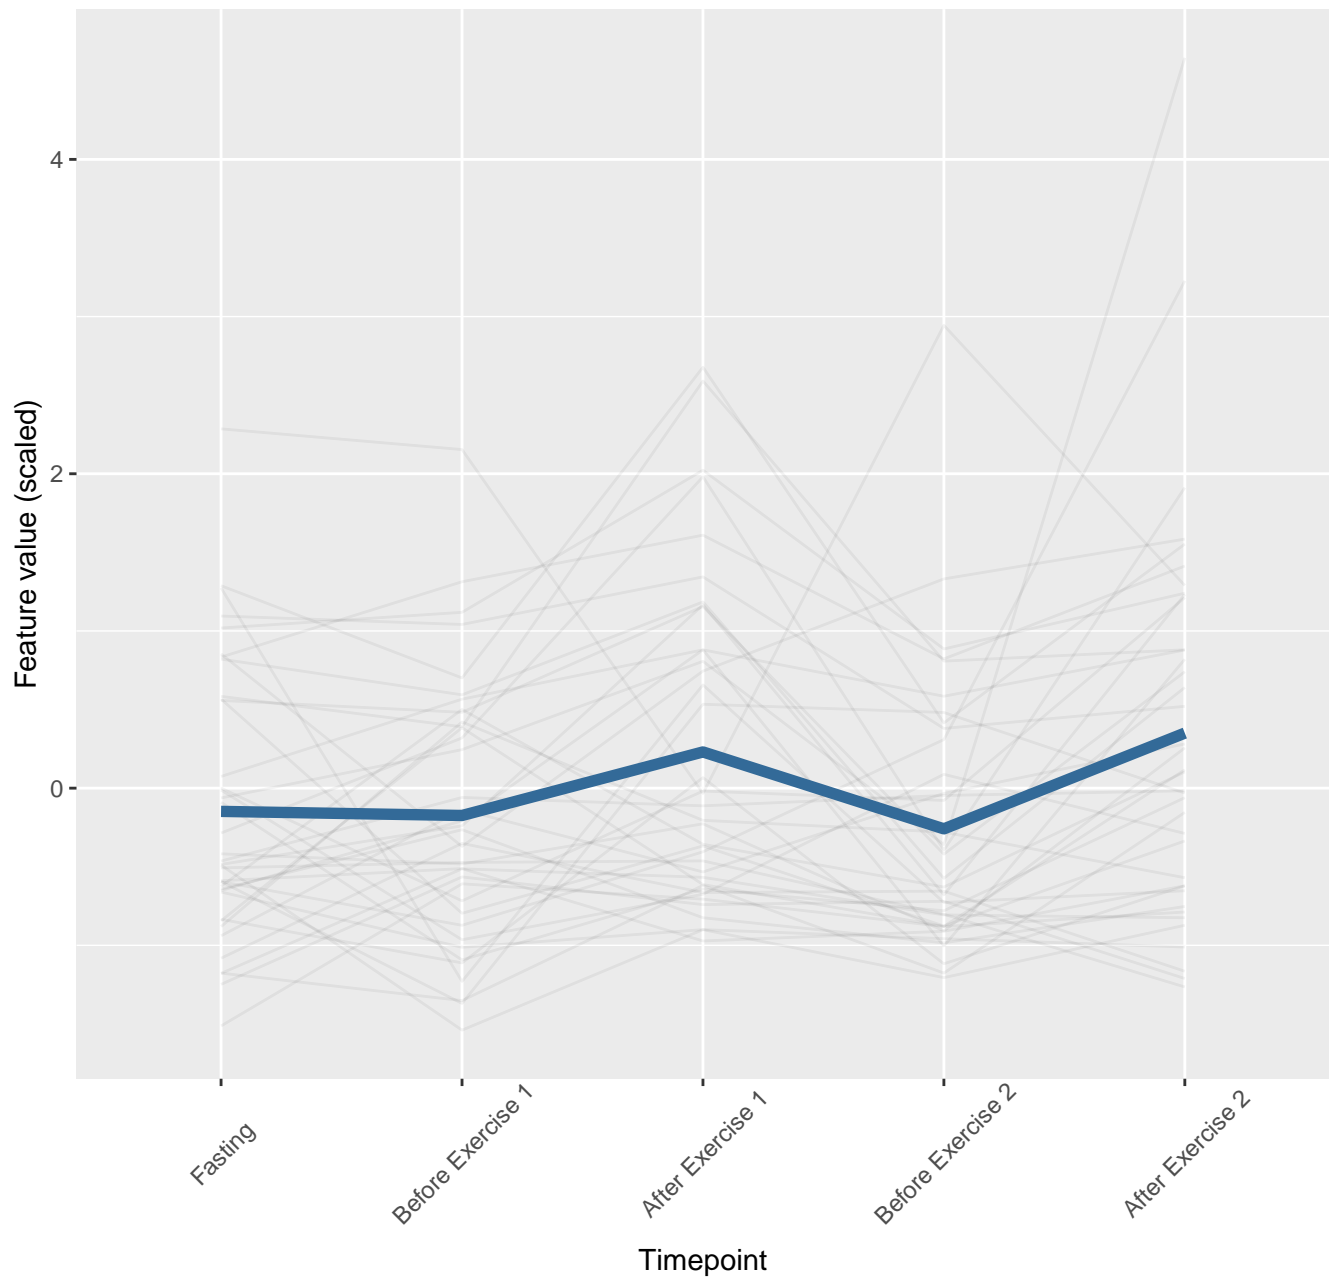

Line plot of SM(d41:2)

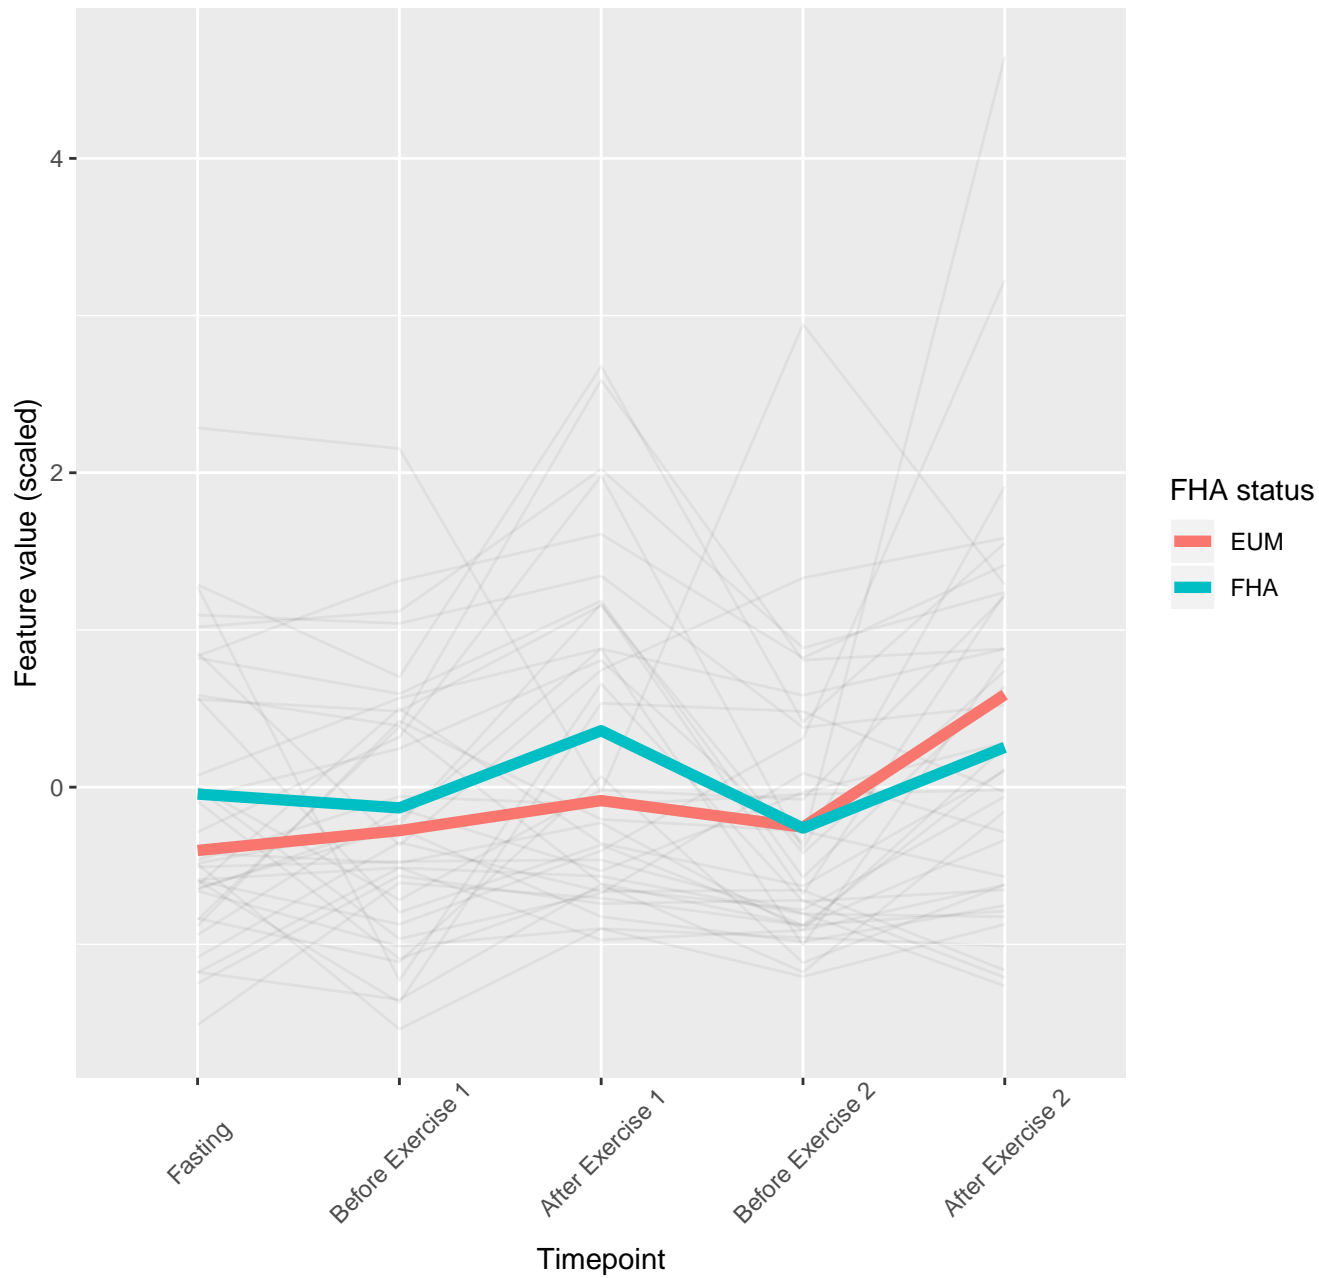

Line plot of SM(d41:2)

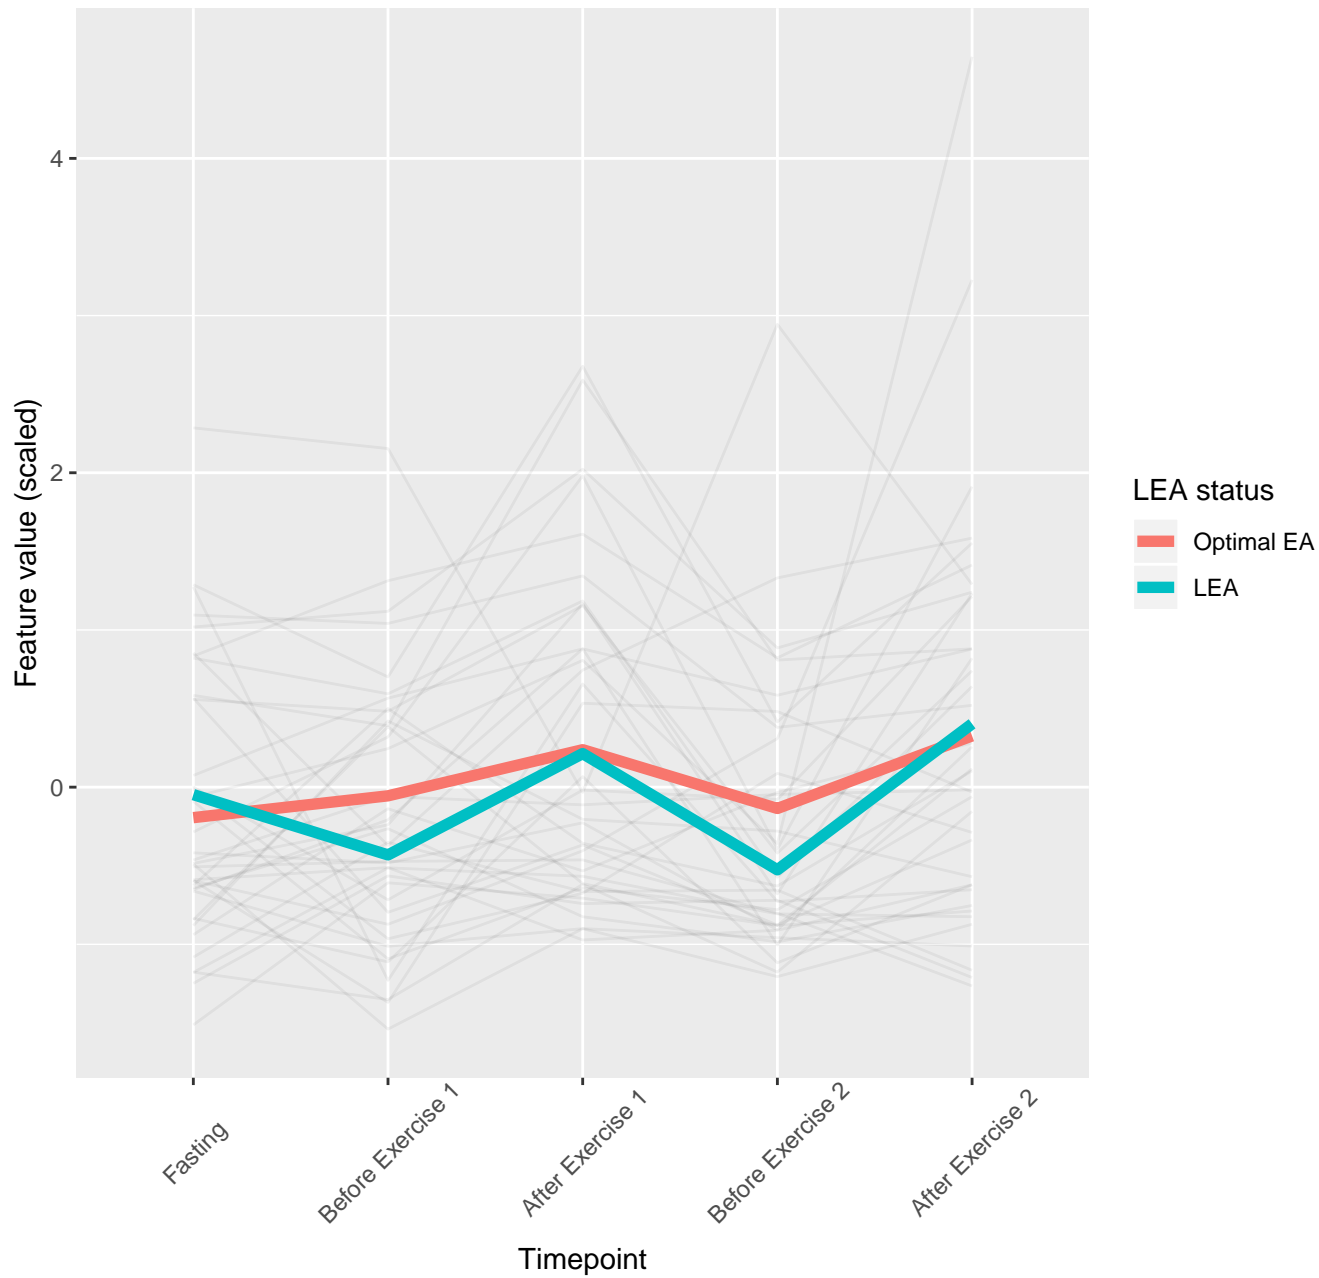



MISCELLANEOUS

Line plot of CE(18:2) + Unknown CE(667.6219)

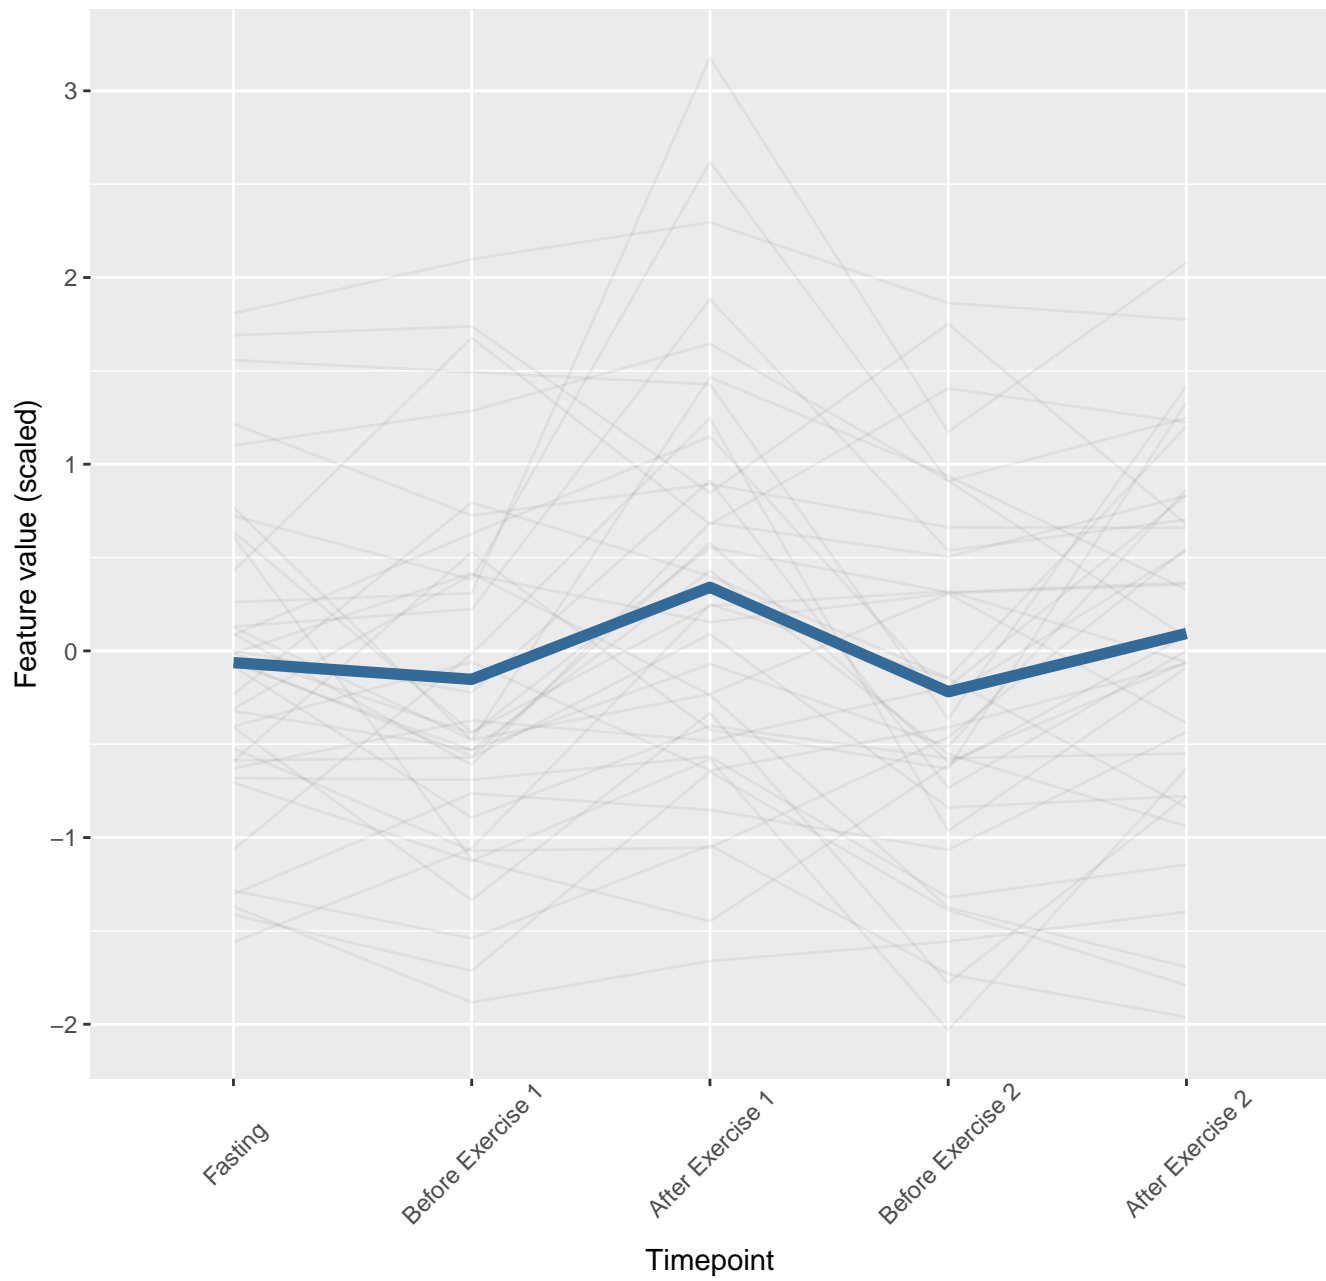

Line plot of CE(18:2) + Unknown CE(667.6219)

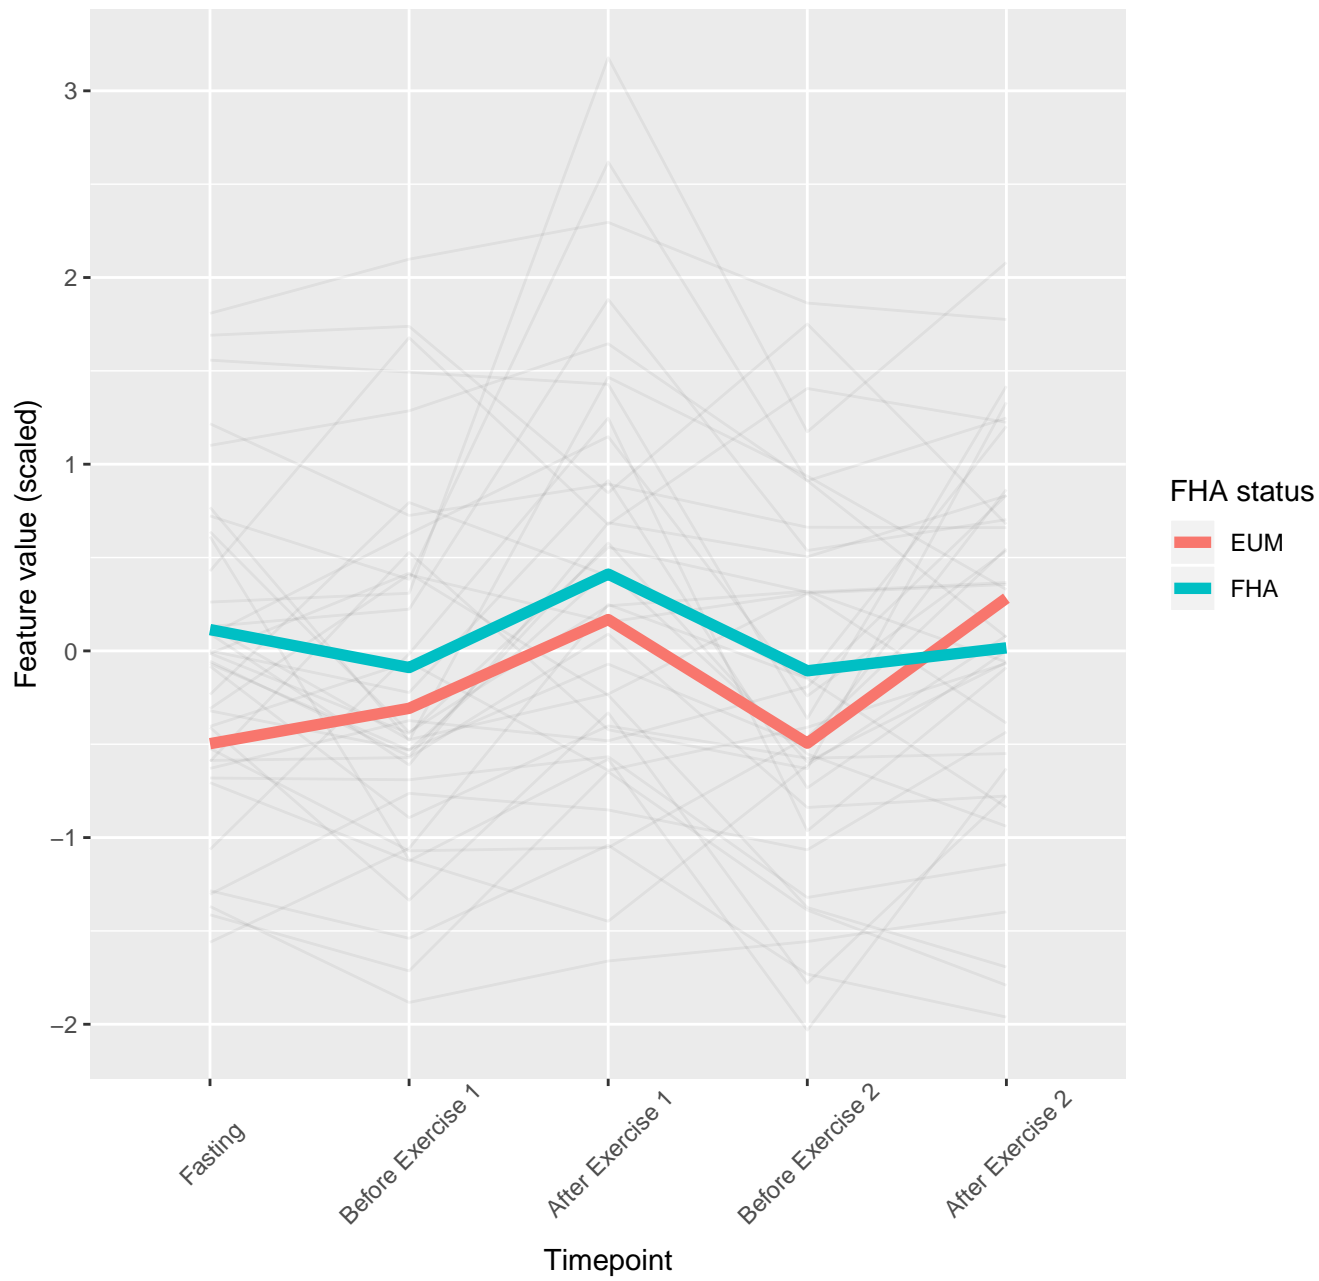

Line plot of CE(18:2) + Unknown CE(667.6219)

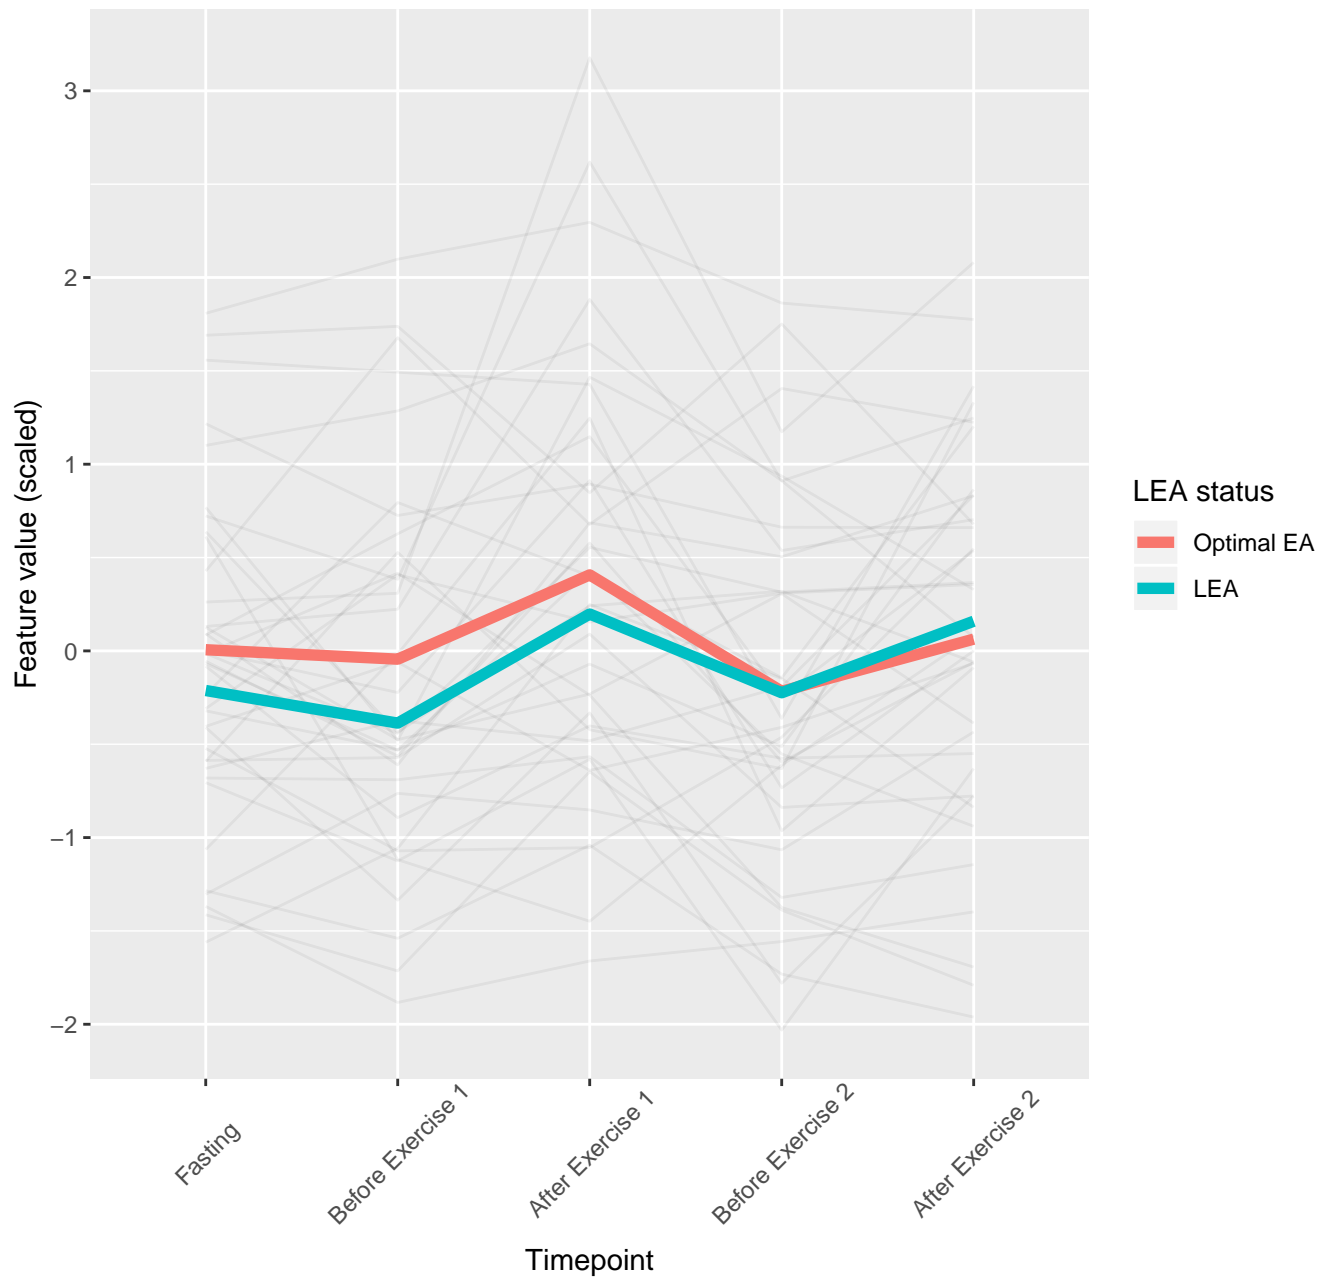

Line plot of Fragment: CE signature ion

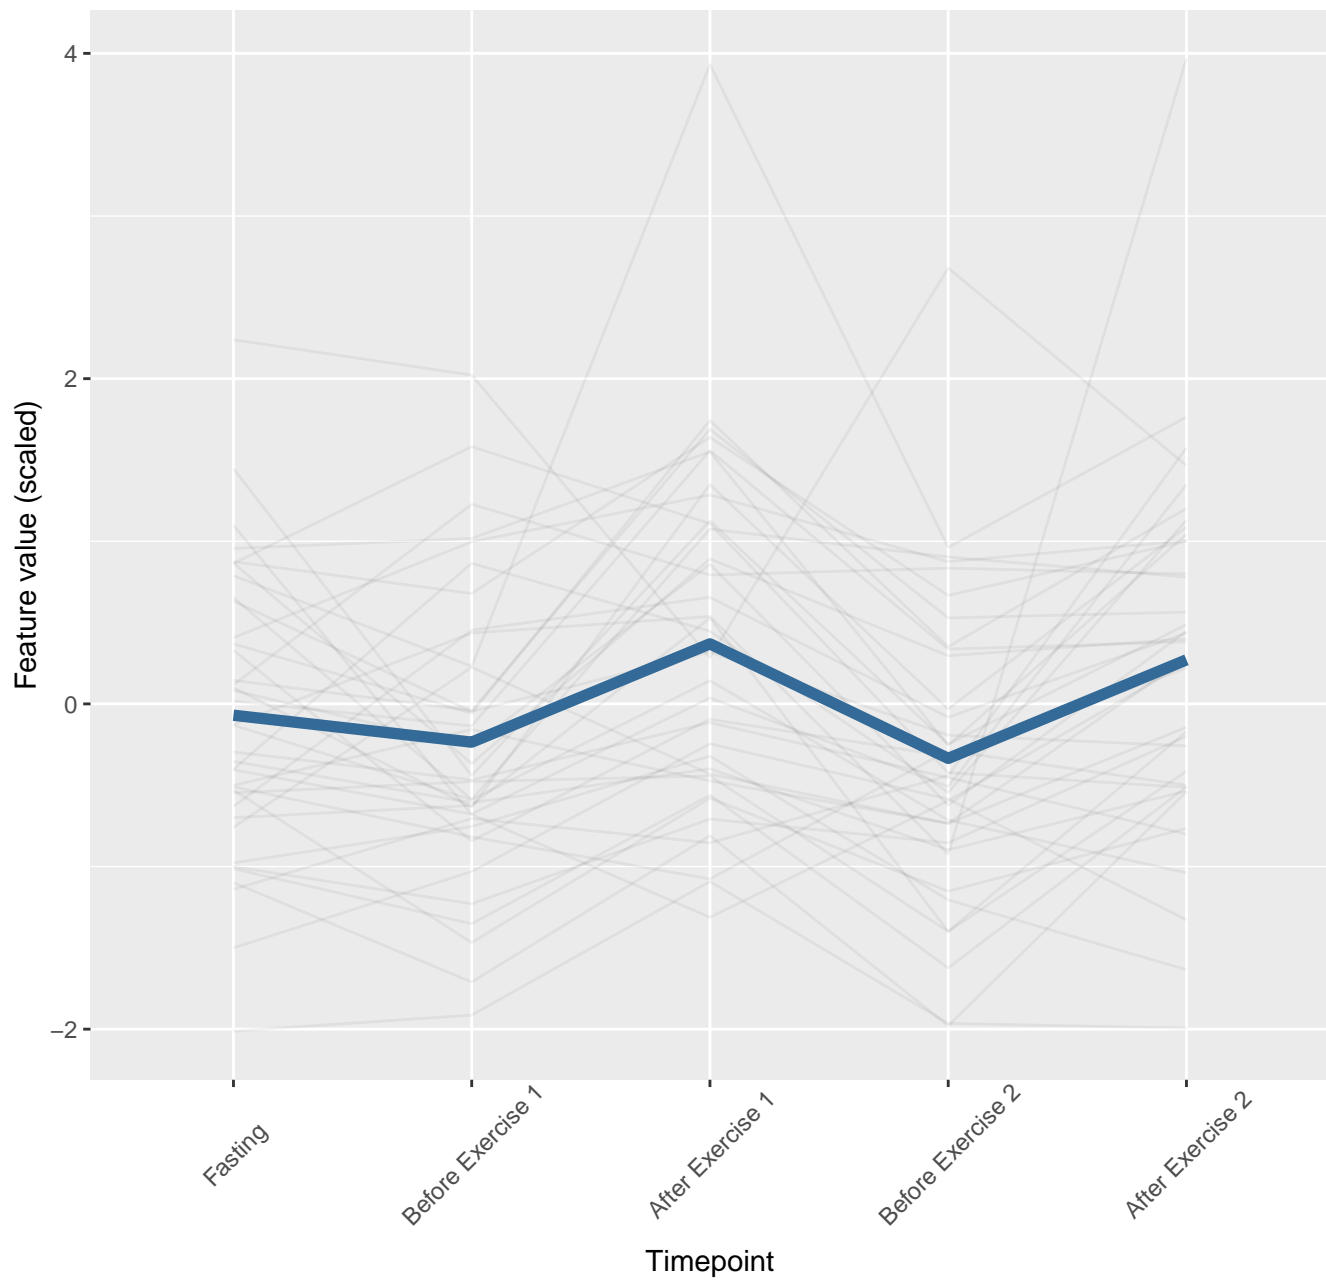

Line plot of Fragment: CE signature ion

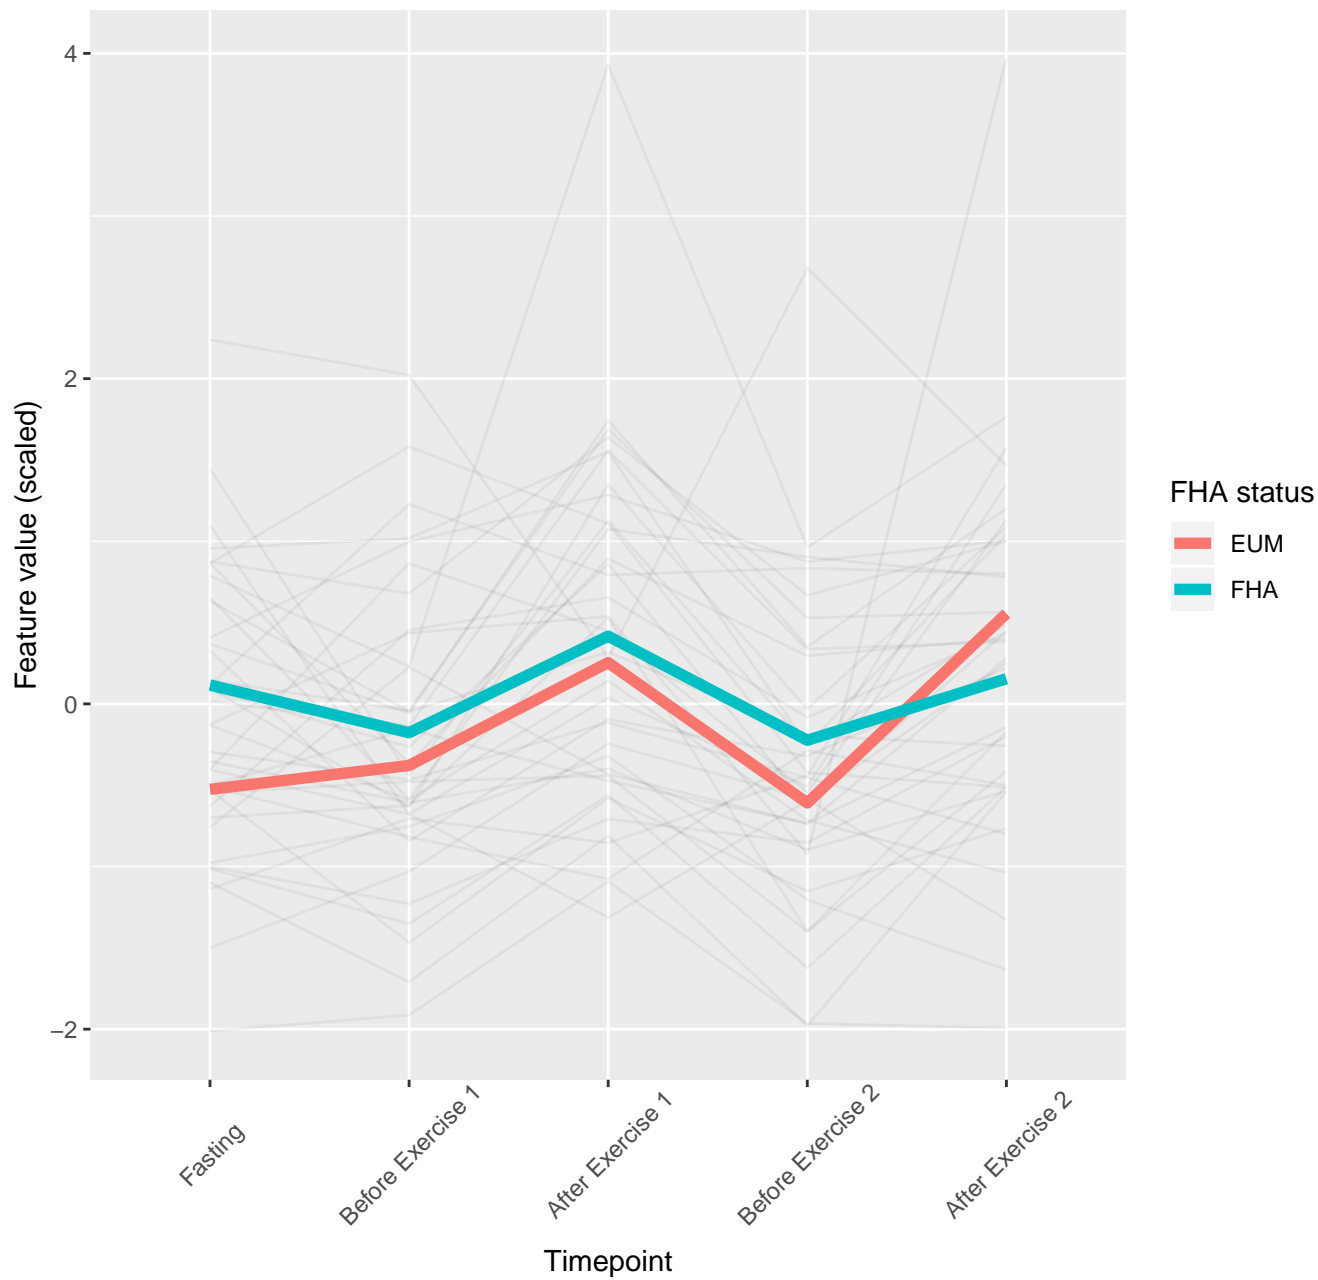

Line plot of Fragment: CE signature ion

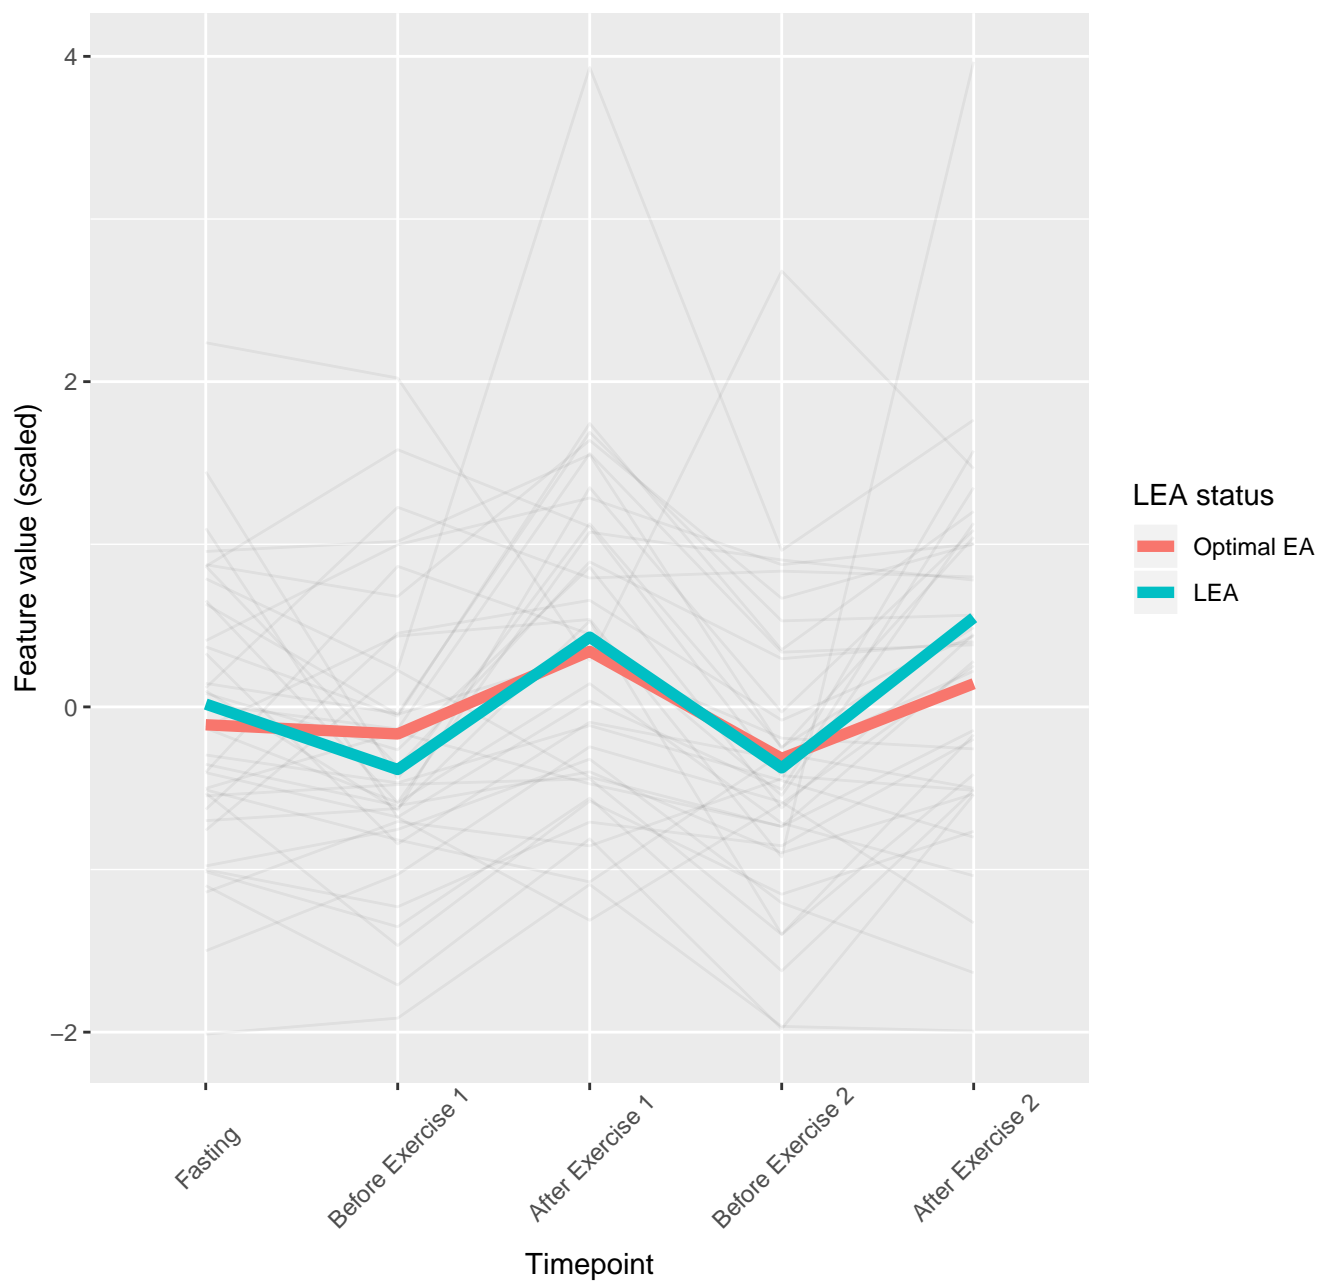

Supplement: 41598_2020_59127_MOESM1_ESM.pdf [file 41598_2020_59127_MOESM1_ESM.pdf]
