# Supplementary material for: Lipidomic profiles, lipid trajectories and clinical biomarkers in female elite endurance athletes
Source: PubMed Central journal article supplement (PMC7012926; doi:10.1038/s41598-020-59127-8), 2020-02-11

# LEA Lipidomics traj clusters

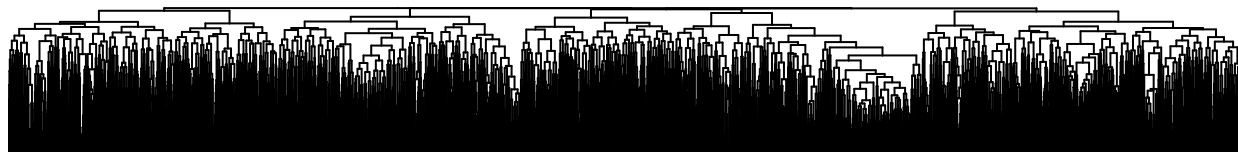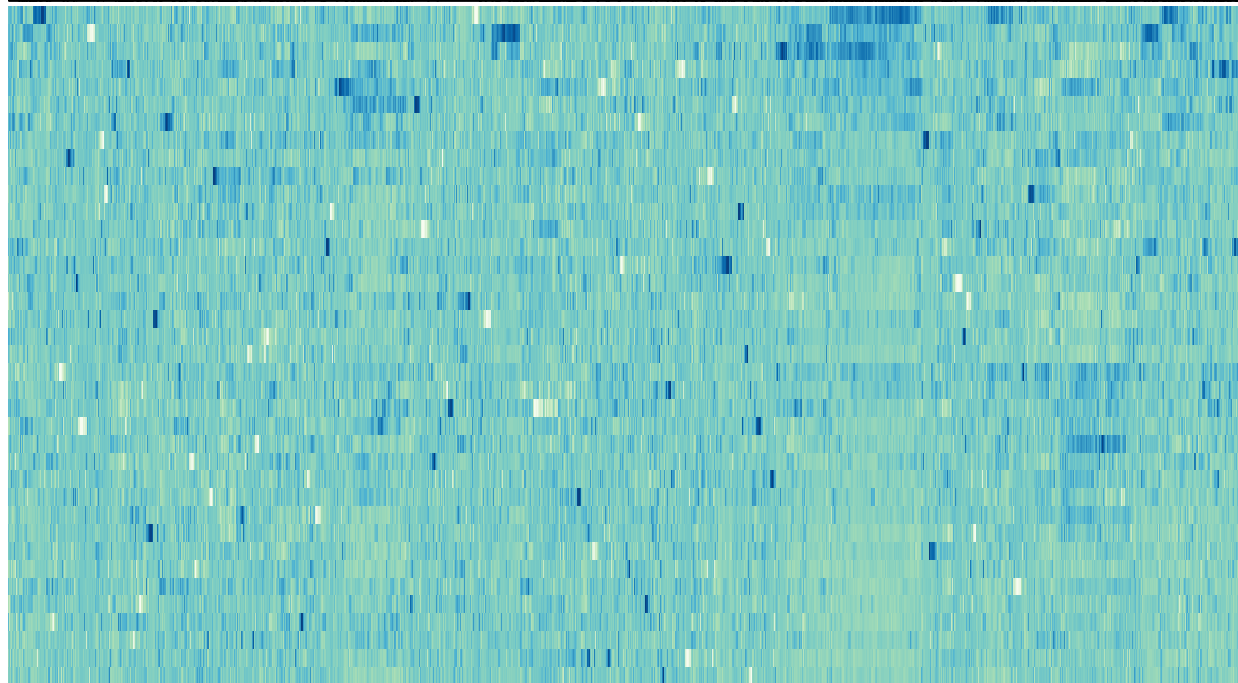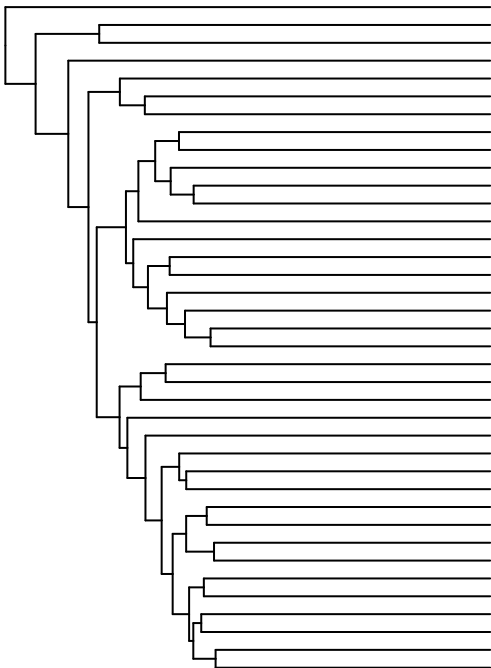

Supplement: 41598_2020_59127_MOESM2_ESM.pdf [file 41598_2020_59127_MOESM2_ESM.pdf]
