# Supplementary material for: Lipidomic profiles, lipid trajectories and clinical biomarkers in female elite endurance athletes
Source: PubMed Central journal article supplement (PMC7012926; doi:10.1038/s41598-020-59127-8), 2020-02-11

# SUPPLEMENTARY TEXT 1

MS spectra for the Steno Diabetes  
Center in-house library annotated lipids  
for the pool sample

# SM(d33:1): m/z= 689.56; RT=6.63

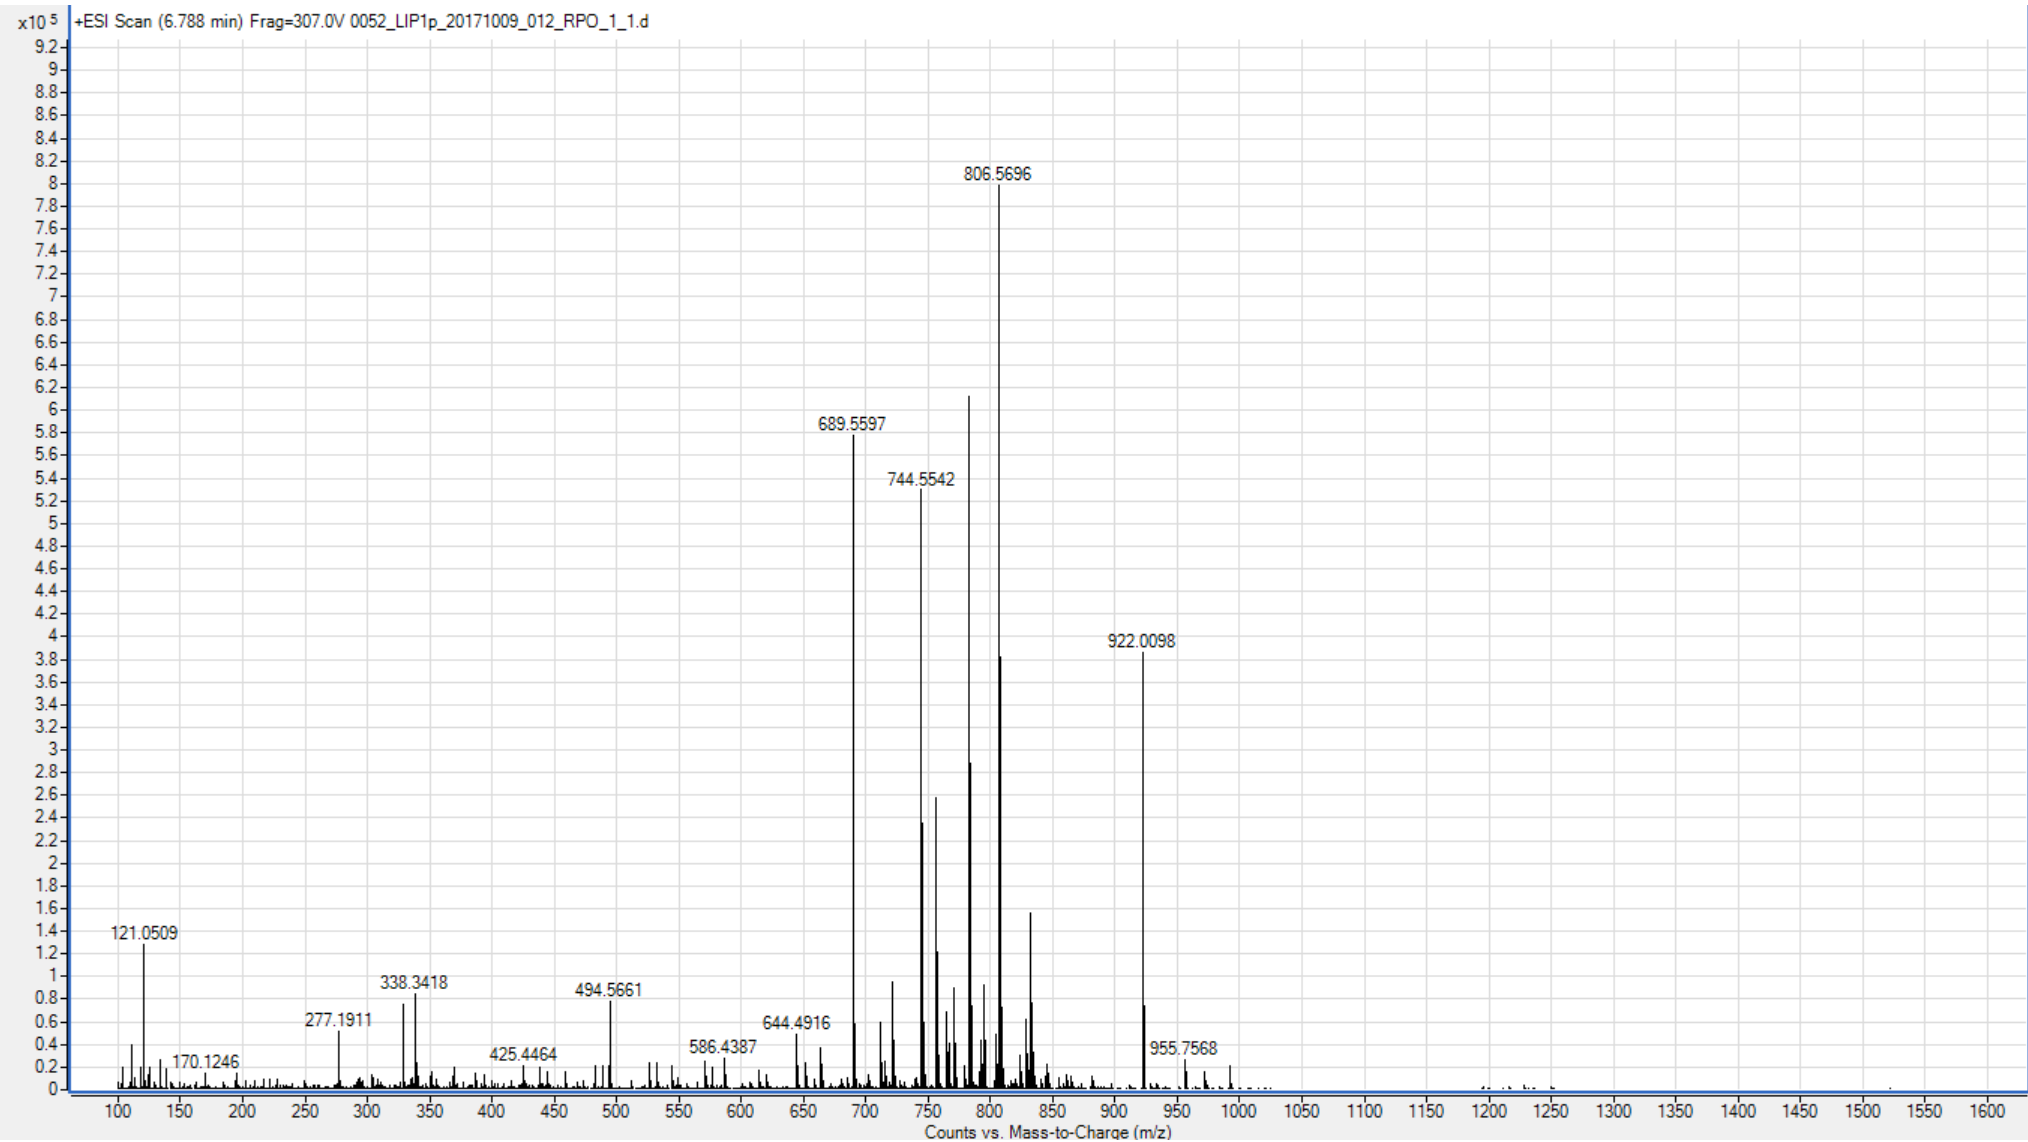

# PC(O-36:2): $m/z=691.5884$ ; RT=6.4

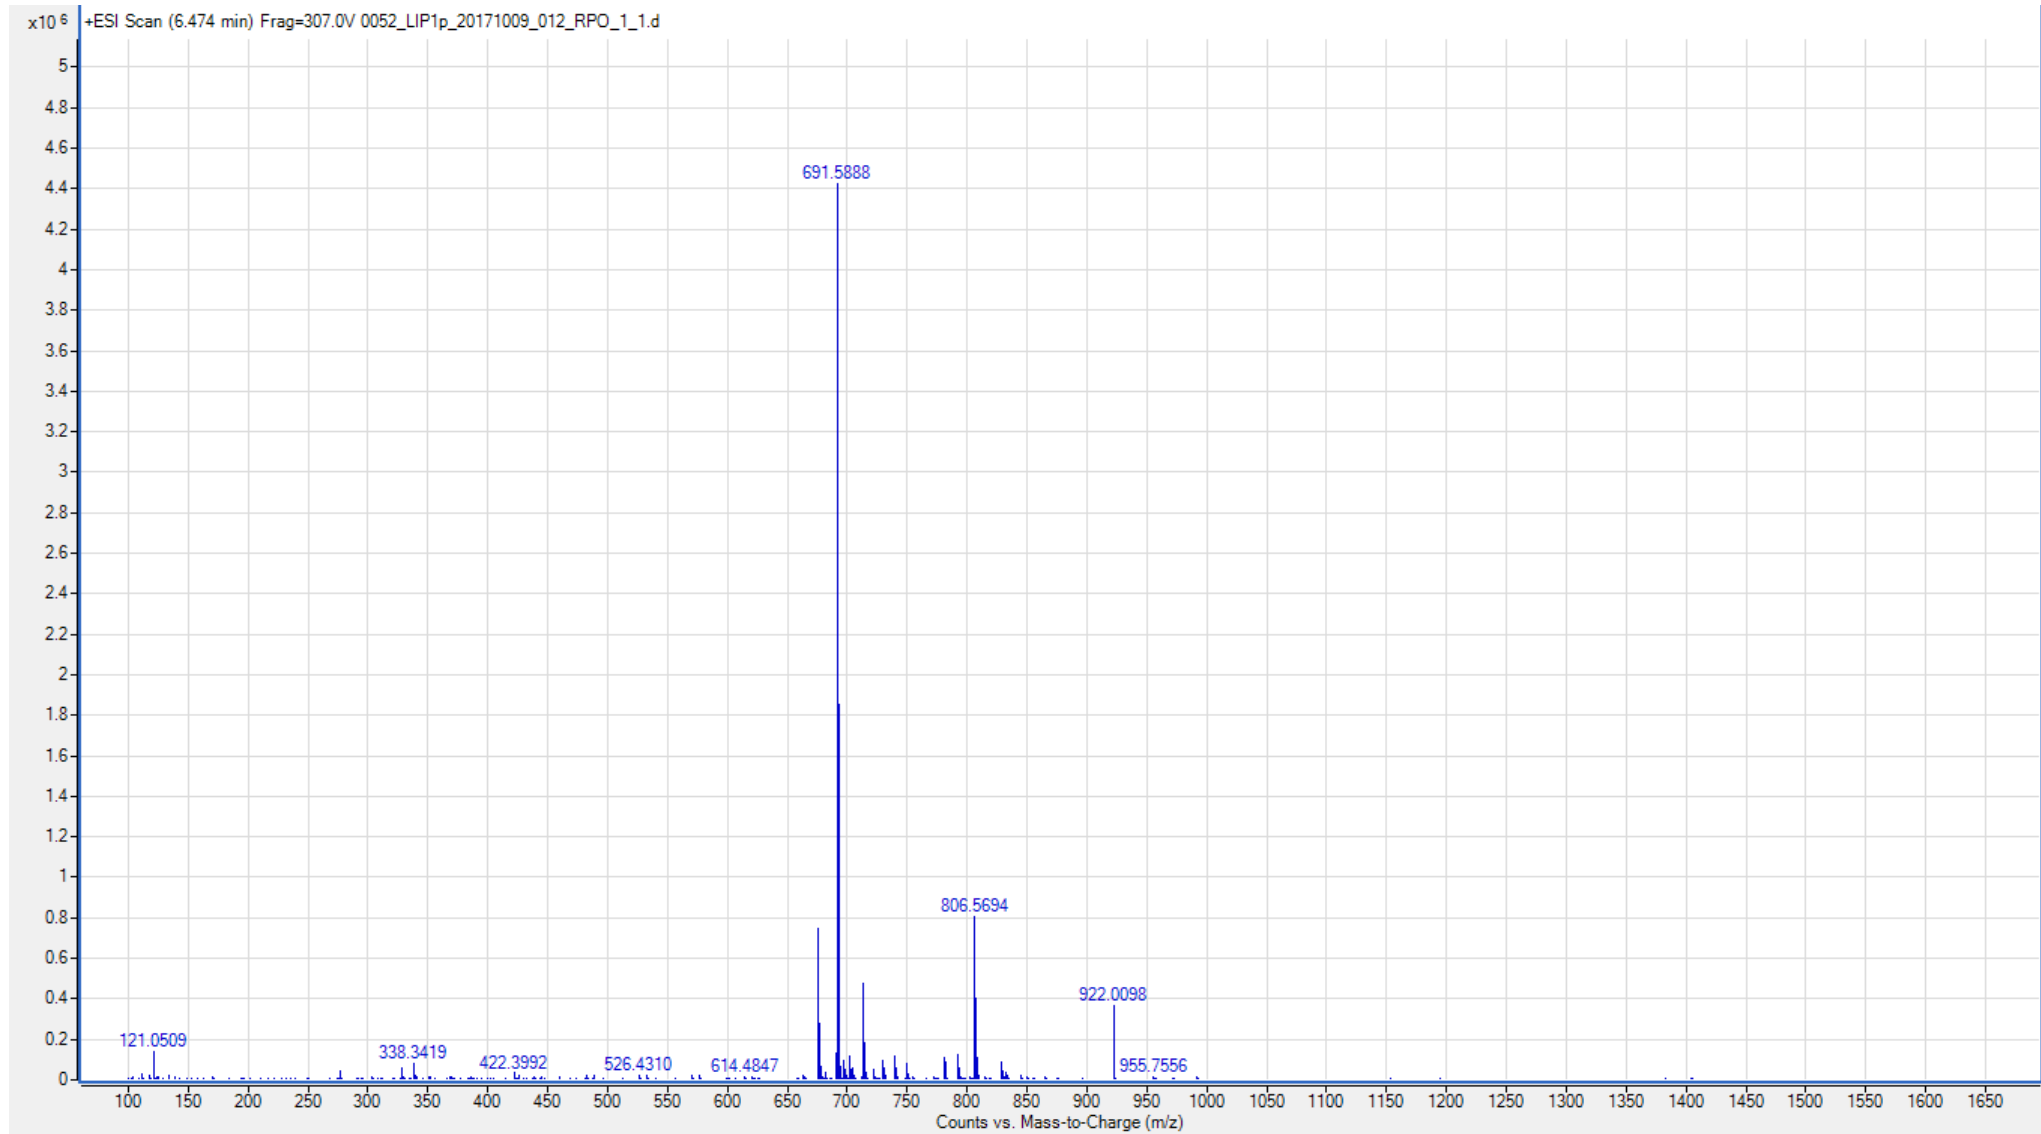

# LPC(18:2): $m/z=520.34$ ; RT=3.79

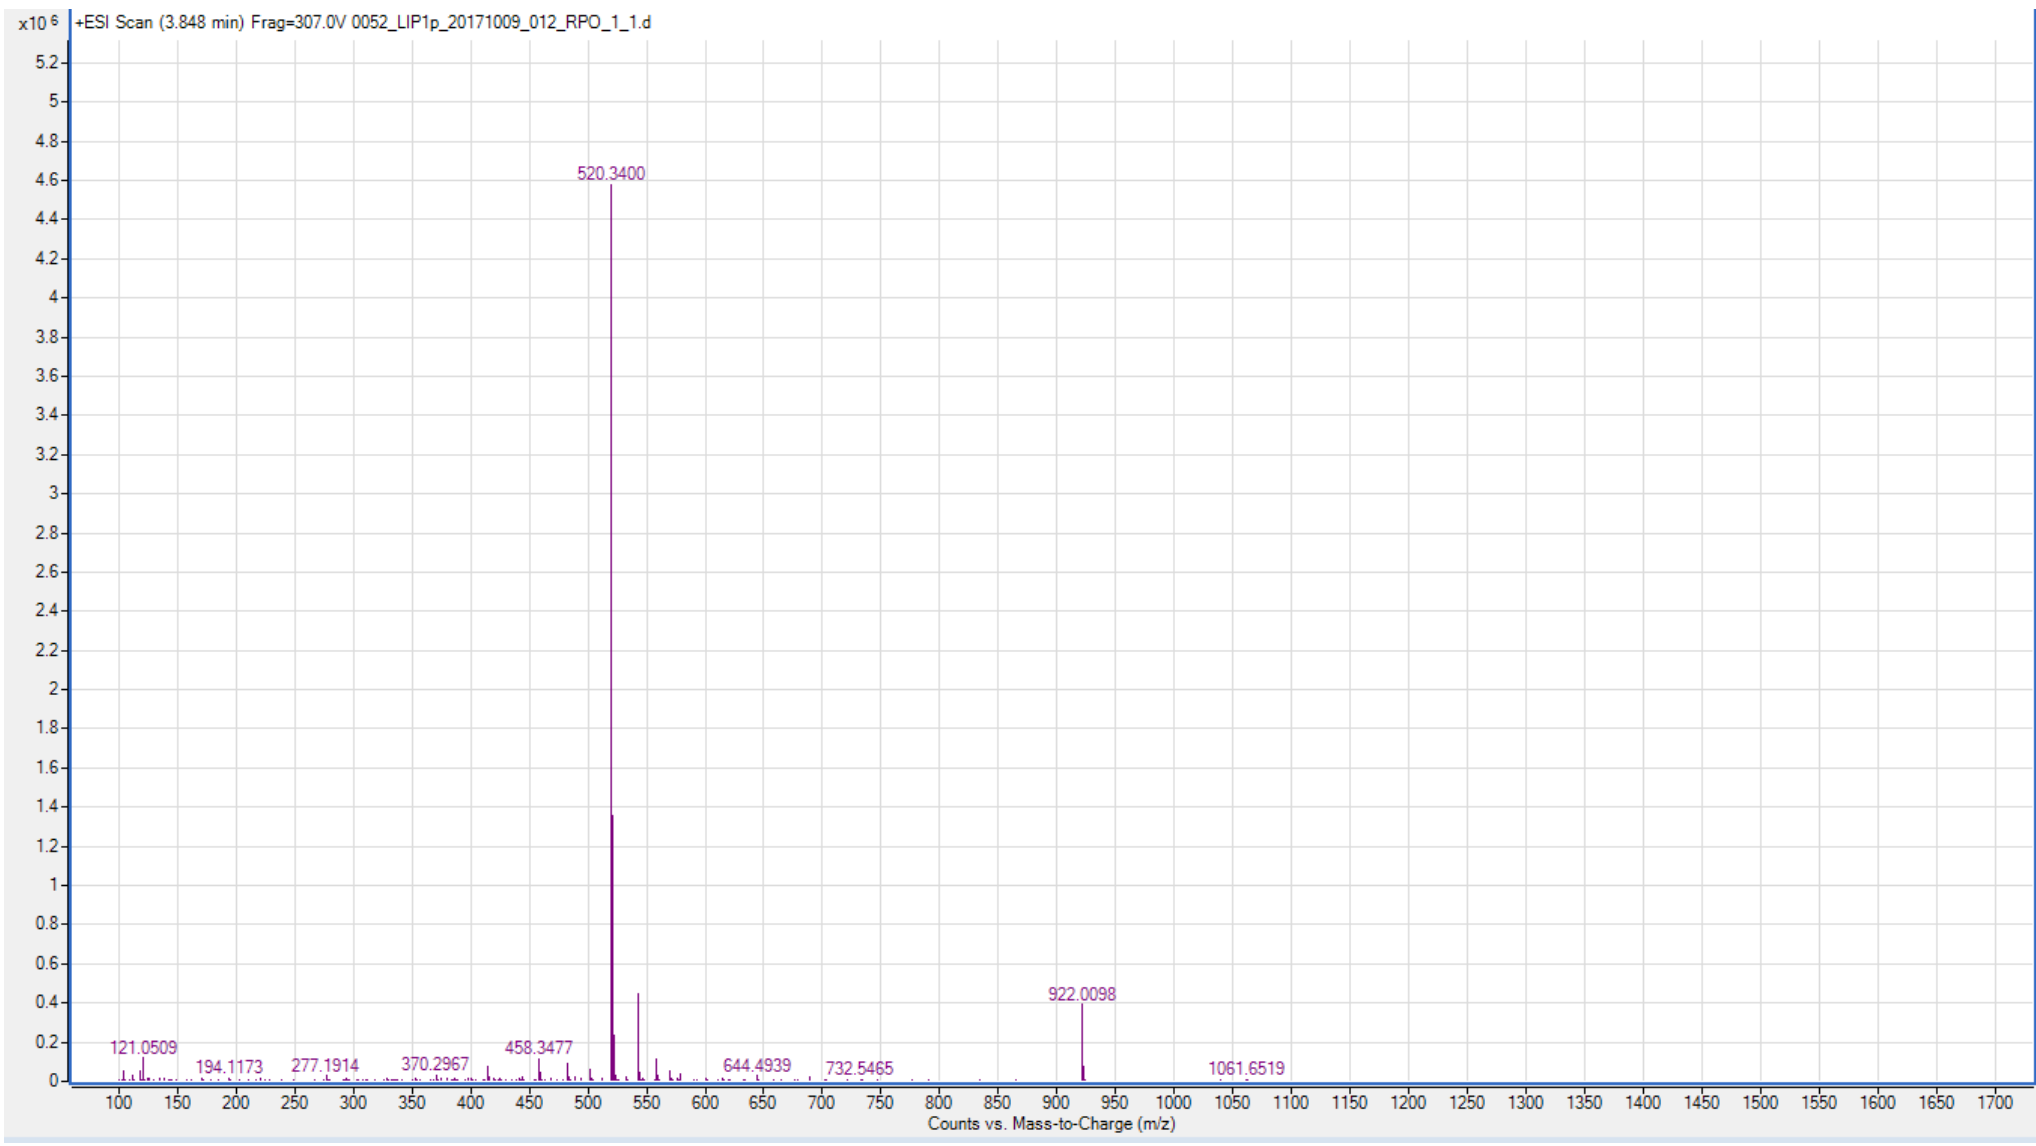

# SM(d38:1): $m/z=759.64$ ; RT=7.82

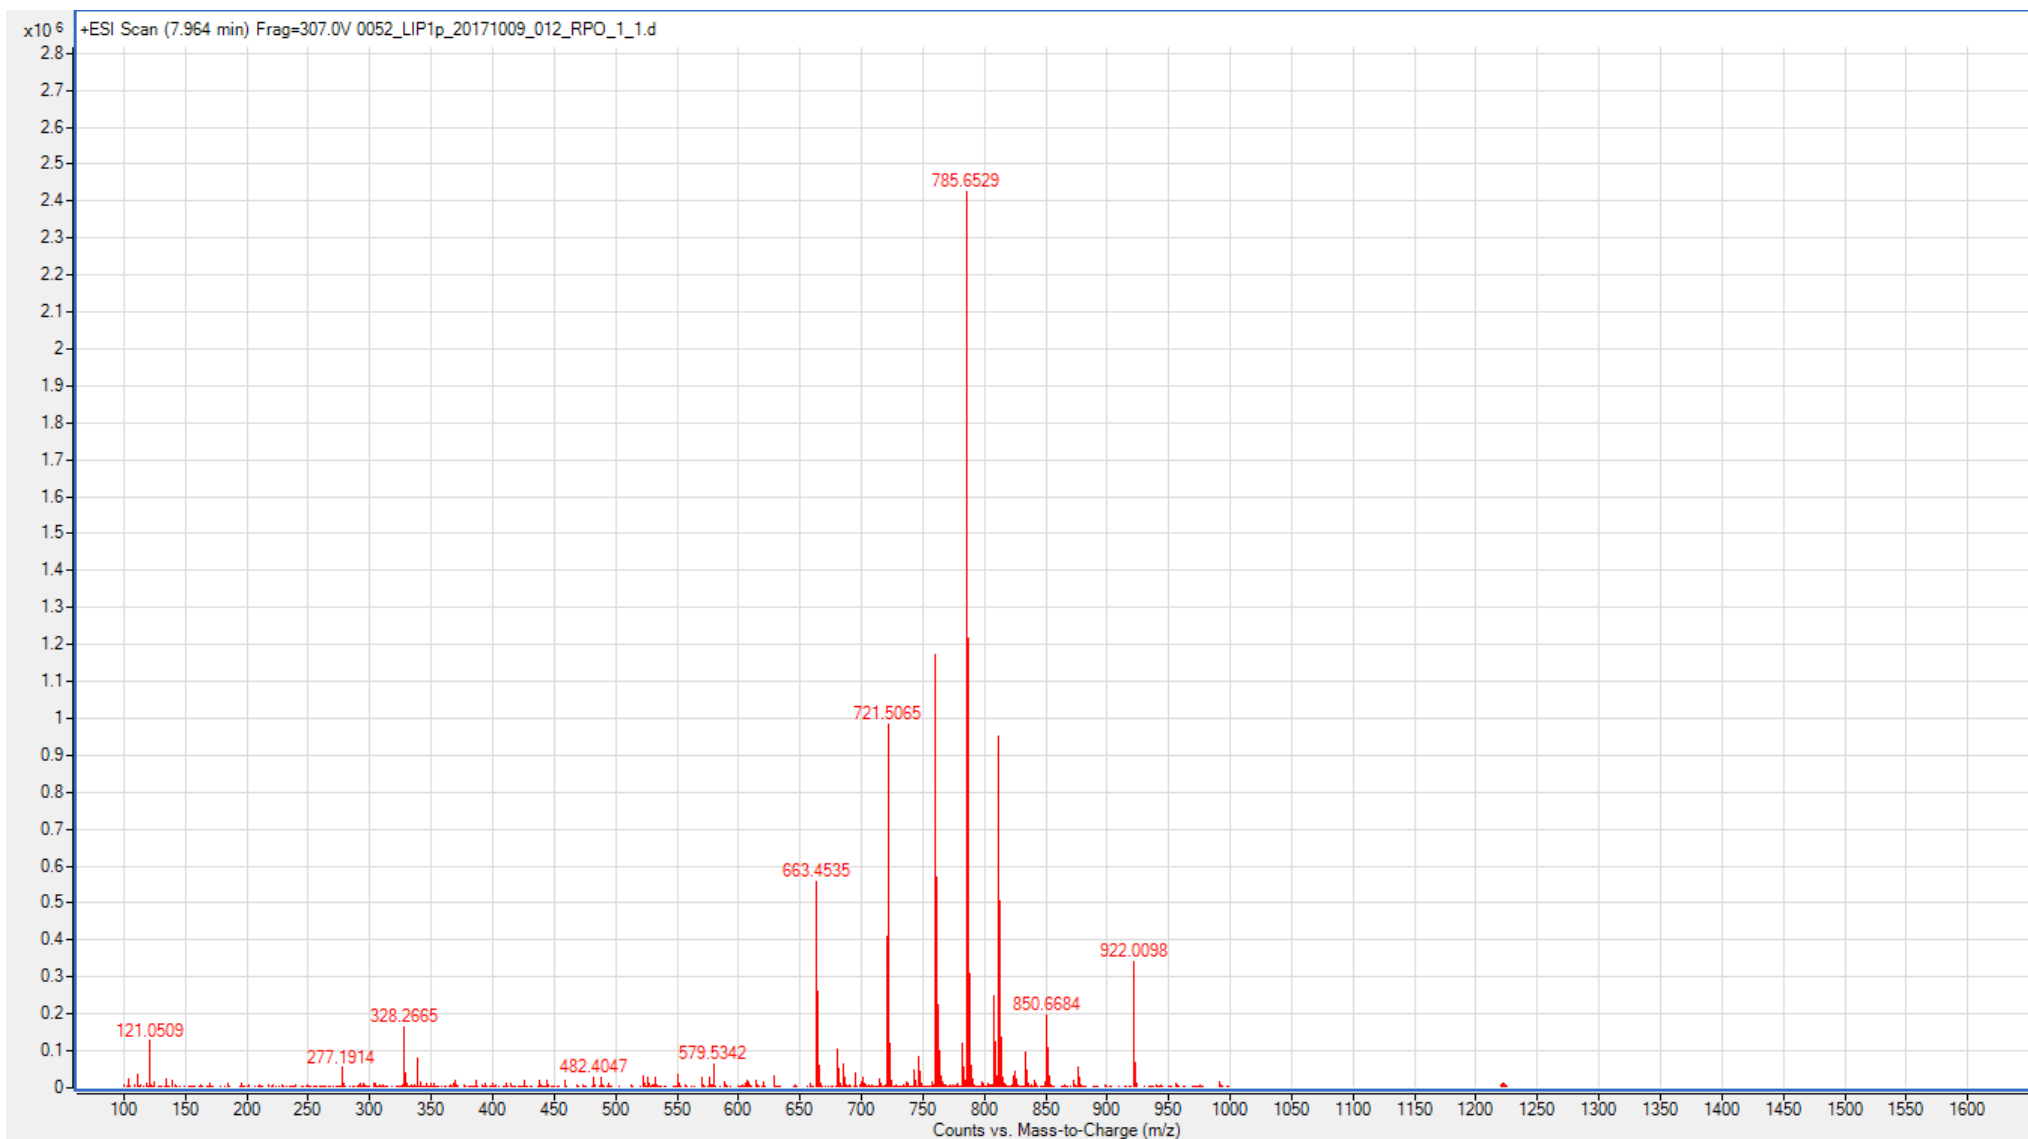

# SM(d32:1): m/z=675.54; RT=6.35

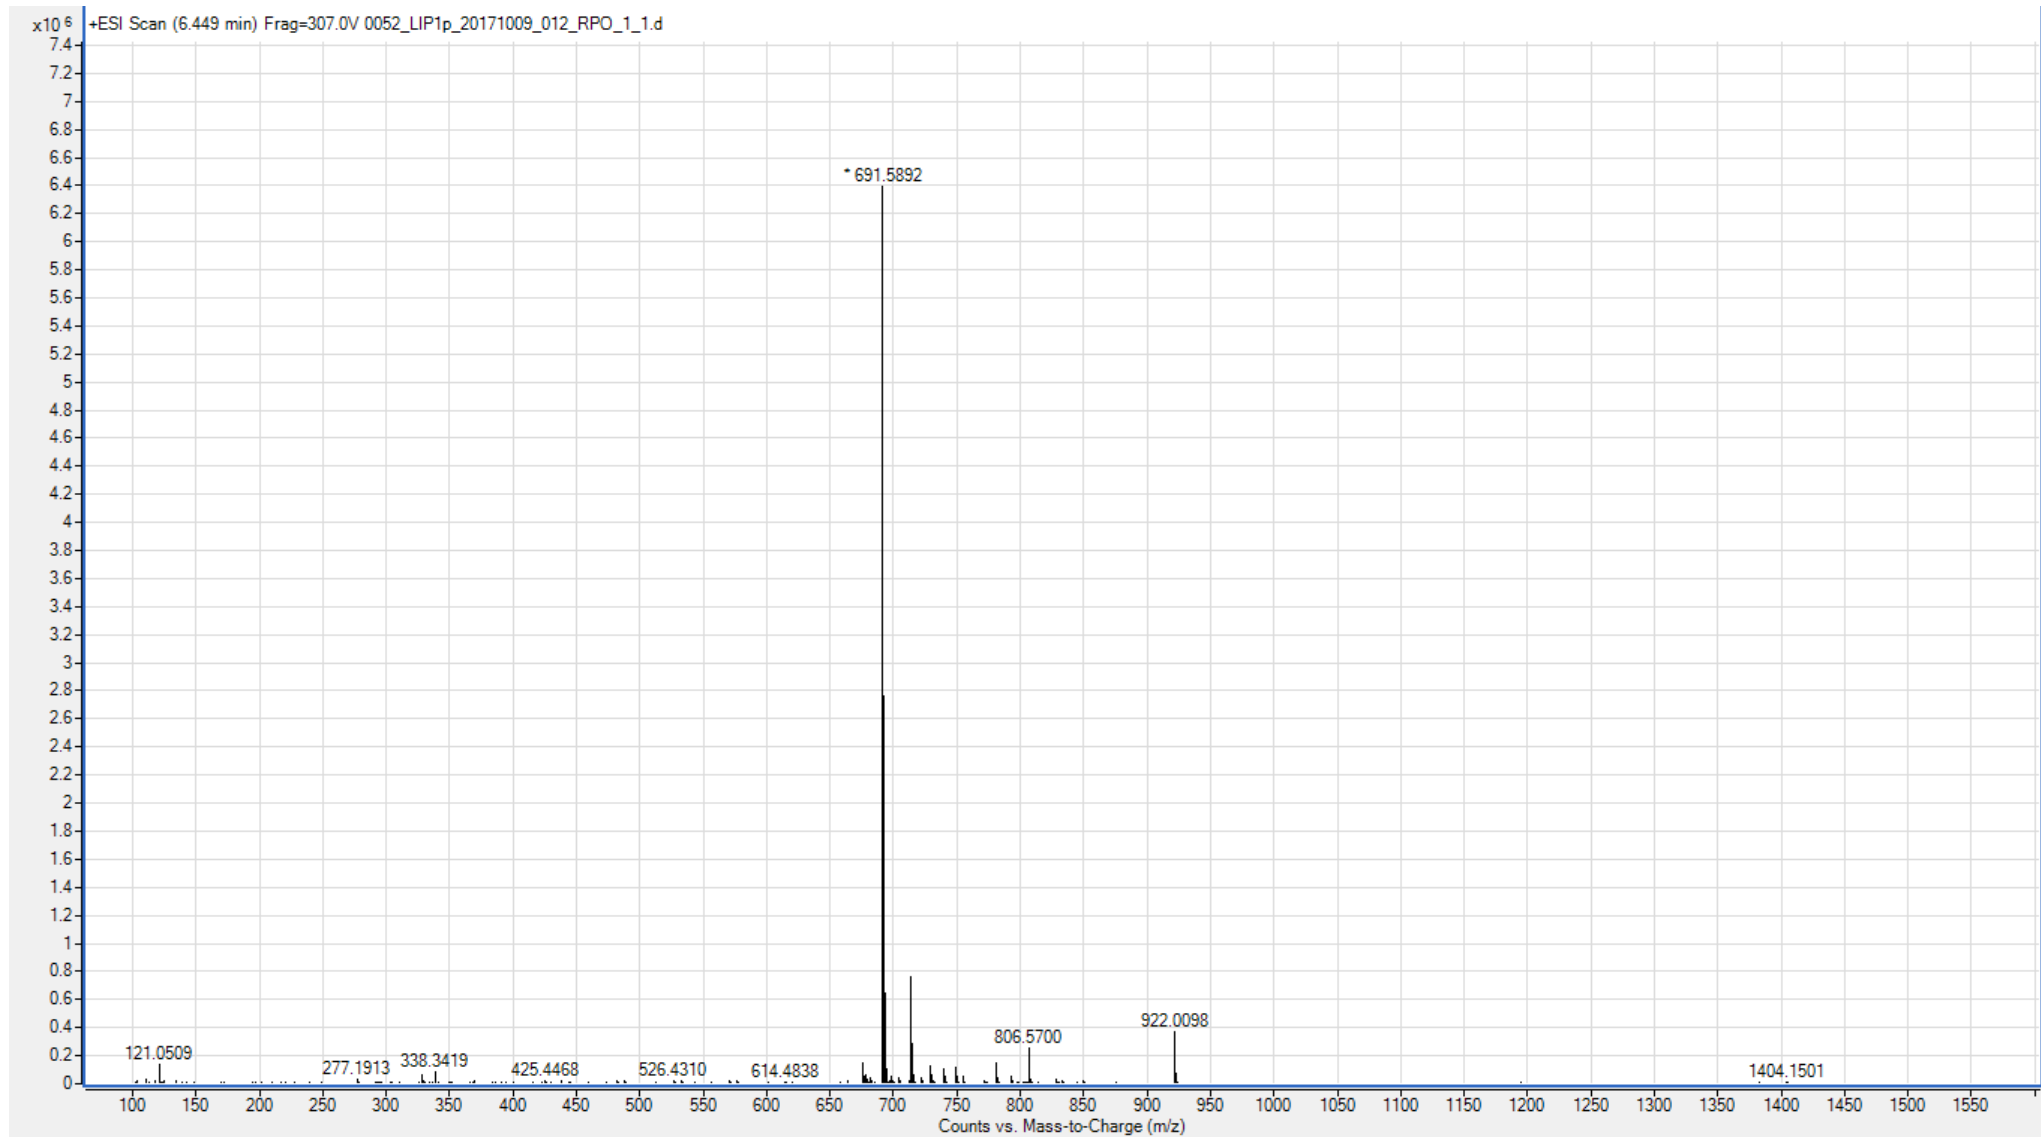

# SM(d18:2/18:1): $m/z=727.57$ ; RT=6.4

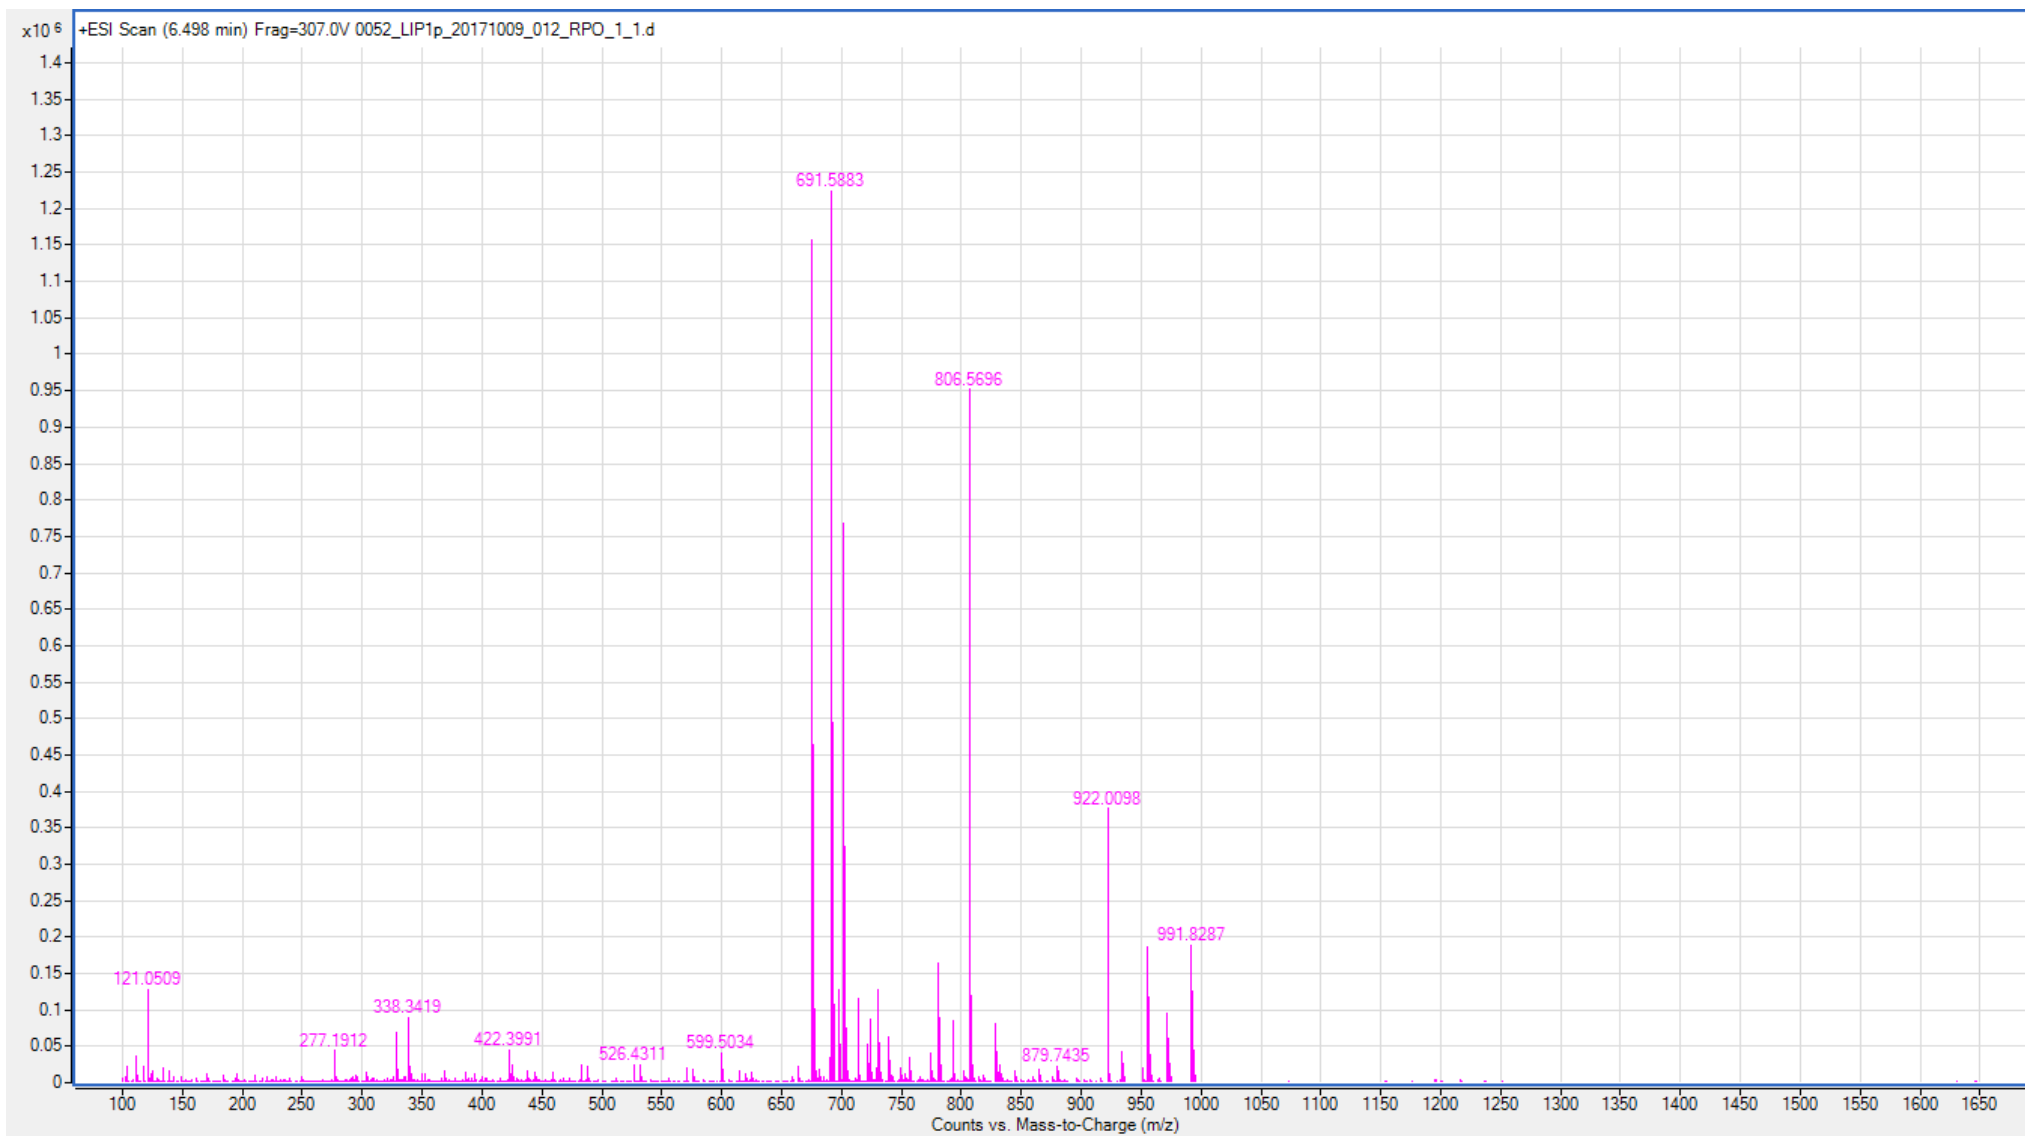

# PC(42:6): $m/z=862.63$ ; RT=7.11

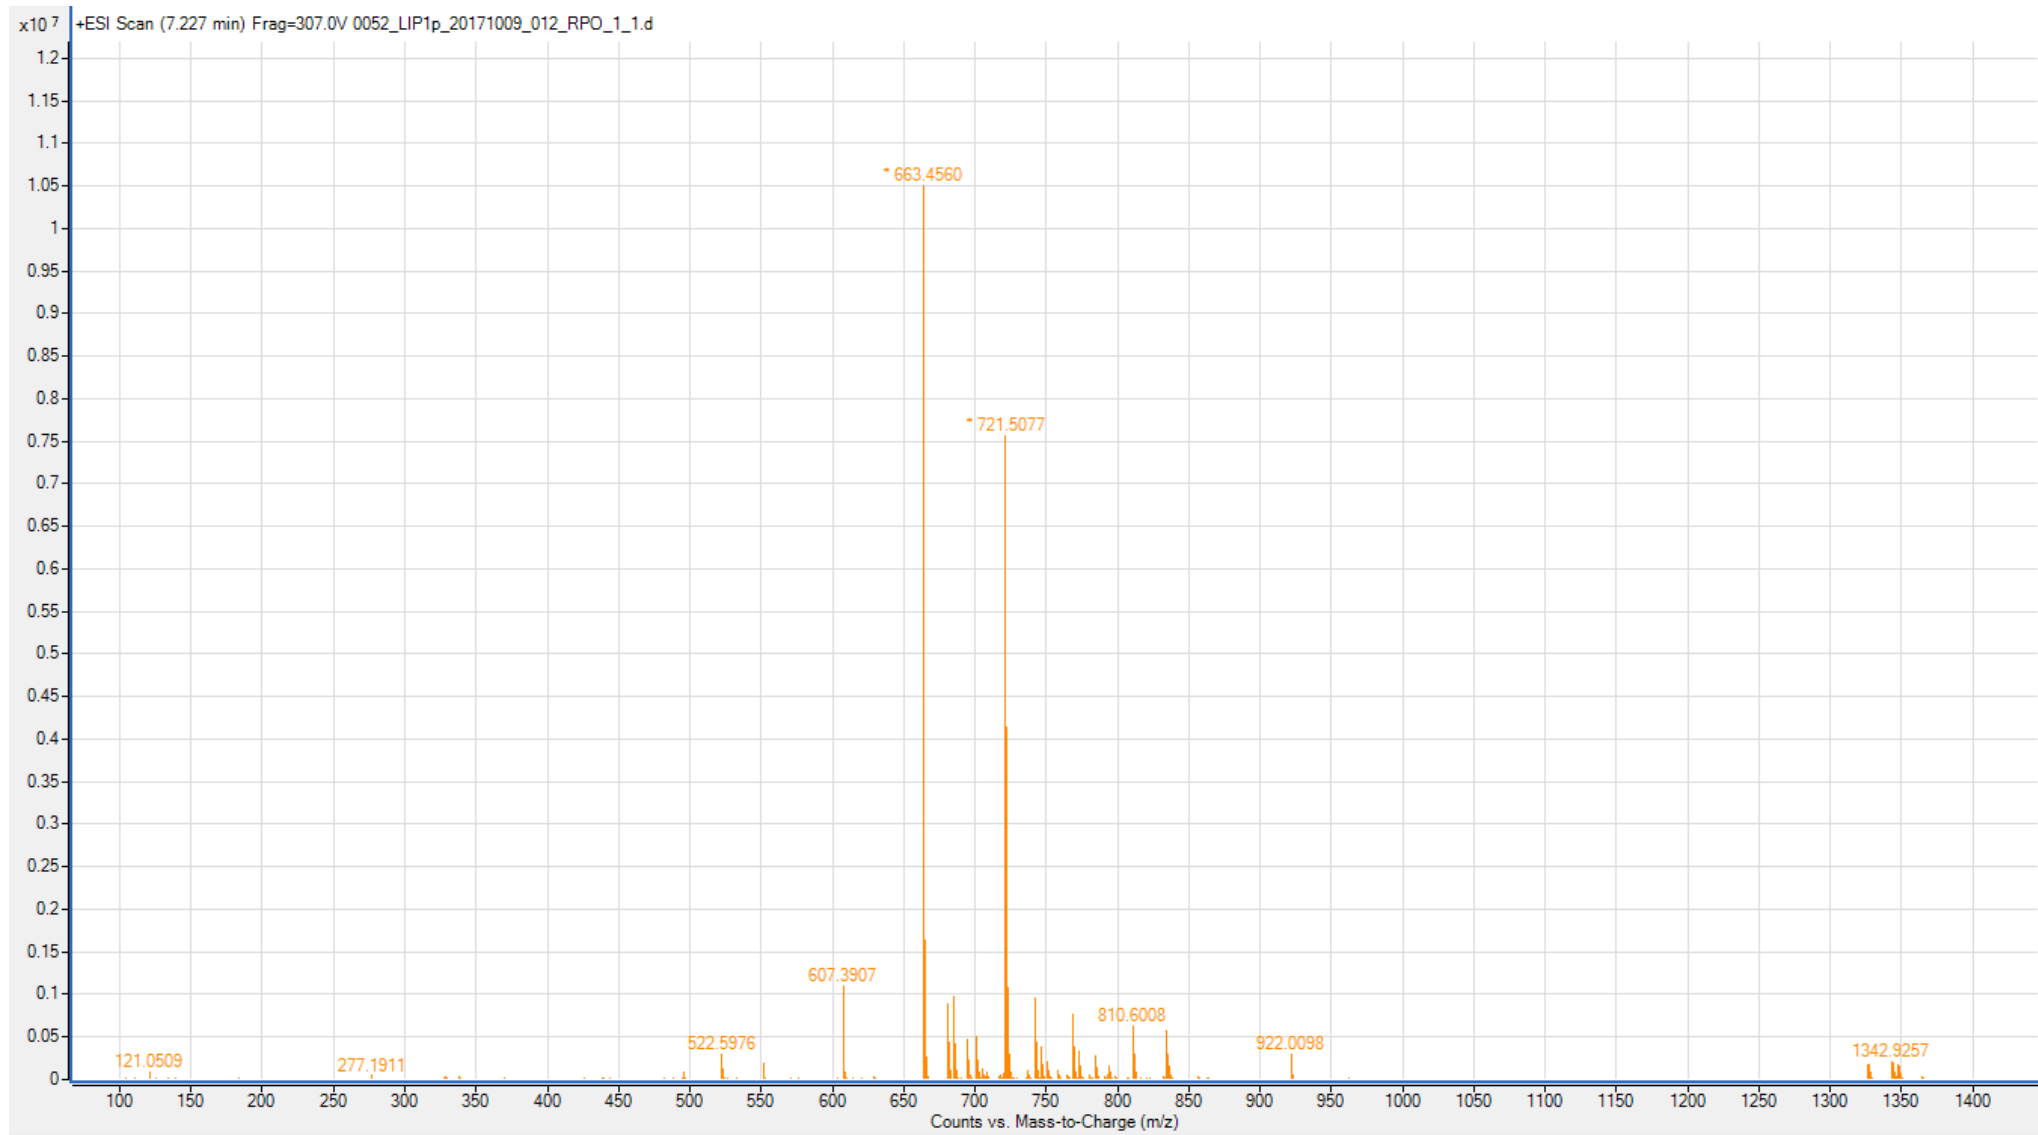

Supplement: 41598_2020_59127_MOESM4_ESM.pdf [file 41598_2020_59127_MOESM4_ESM.pdf]
